# Supplementary material for: Knockdown of ATF3 suppresses the progression of ischemic stroke through inhibiting ferroptosis
Source: Frontiers journal article supplement (doi:10.3389/fnmol.2022.1079338), 2023-01-18
Supplement: Data_Sheet_1.ZIP [file Data_Sheet_1.ZIP]

## Sheet: Results
	Area	Dead	Live	All		Dead	Dead %		Sham	Model
1	14400	2.267	53.904	56.171		0.0403589	4.03589		4.03589	35.7586
2	14400	0.336	42.11	42.446		0.00791594	0.791594		0.791594	28.8469
3	14400	0.142	57.428	57.57		0.00246656	0.246656		0.246656	27.9239
4	14400	14.184	25.482	39.666		0.357586	35.7586
5	14400	10.324	25.465	35.789		0.288469	28.8469
6	14400	10.147	26.191	36.338		0.279239	27.9239
