# Supplementary material for: Knockdown of ATF3 suppresses the progression of ischemic stroke through inhibiting ferroptosis
Source: Frontiers journal article supplement (doi:10.3389/fnmol.2022.1079338), 2023-01-18
Supplement: Data_Sheet_2.ZIP [file Data_Sheet_2.ZIP]

## Sheet: Sheet1
id	baseMean	baseMean_C	baseMean_MCA	foldChange(MCA/C)(MCA/C)	log2FoldChange	pval	padj	Chromosome	Start Site	End Site	Direction	Length	Name	GO	KEGG	EC	eggNOG Class	eggNOG	Description	Entrez_geneID	UniProtAC
ENSRNOG00000047261	194.873	366.941	22.8052	0.0621495	-4.00811	1.62593e-20	2.96e-16	18	14756684	14964991	+	1747	AABR07031445.1	GO:0005515;GO:0008017;GO:0008017;GO:0005515;GO:0008017;GO:0008017;GO:0005515;GO:0005737;GO:0005815;GO:0005856;GO:0005874;GO:0005881;GO:0007049;GO:0008017;GO:0008017;GO:0031110;GO:0035371;GO:0051010;GO:0051225;GO:0051233;GO:0051301;GO:1904825;	-	-	Z	12QG6;KOG3000	-	-	-
ENSRNOG00000024082	148.834	38.9392	258.728	6.6444	2.73214	3.27596e-11	2.98194e-07	8	58870516	58914603	+	2383	Gldn	GO:0005615;GO:0005886;GO:0009986;GO:0016020;GO:0016021;GO:0032528;GO:0034113;GO:0045162;GO:0045162;GO:0045162;GO:0086080;	K16364	-	W	0V0WW;196QV;1B9V9;0WCCH;0E5DV;0AZW3;0KCV6;14T0V;1DCDY	gliomedin [Source:RGD Symbol;Acc:727879]	315675	Q80WL1
ENSRNOG00000010626	126.213	32.9825	219.443	6.65331	2.73407	1.58679e-10	9.62918e-07	10	105498728	105504393	+	3779	Sphk1	GO:0003951;GO:0003951;GO:0016301;GO:0016301;GO:0016301;GO:0016310;GO:0003951;GO:0003951;GO:0016301;GO:0016301;GO:0016301;GO:0016310;GO:0003951;GO:0003951;GO:0016301;GO:0016301;GO:0016301;GO:0016310;GO:0000287;GO:0003677;GO:0003951;GO:0005516;GO:0005524;GO:0005737;GO:0005829;GO:0005886;GO:0005905;GO:0006670;GO:0008289;GO:0008481;GO:0010800;GO:0010803;GO:0016301;GO:0017050;GO:0019722;GO:0030100;GO:…	K04718	EC:2.7.1.91	T;I	0VCBZ;1AYDB;0A1GE;0DP44;1915T;1CY22;KOG1116;0UQ07;12RSX	sphingosine kinase 1 [Source:RGD Symbol;Acc:620048]	170897	Q91V26;A0A0G2JWE5
ENSRNOG00000002918	72.4971	4.85597	140.138	28.859	4.85095	2.24878e-10	1.02347e-06	10	90988732	90990203	+	1472	FAM187A	GO:0016020;GO:0016021;	-	-	S	12NE2;0DF5R;18X1J;09TVB;0IE2U;0UT4Z;1B338;0V4UJ;1CPVE	family with sequence similarity 187, member A [Source:RGD Symbol;Acc:1307851]	287741	Q6AXV7
ENSRNOG00000031167	365.655	129.082	602.228	4.66547	2.22202	7.49204e-10	2.72785e-06	3	147609095	147632801	+	732	AABR07054319.1	GO:0000166;GO:0005524;GO:0005737;GO:0016209;GO:0016491;GO:0032542;GO:0032542;GO:0032542;GO:0032542;GO:0032542;GO:0034599;GO:0055114;GO:0098869;	-	-	L	KOG3388	sulfiredoxin 1 [Source:NCBI gene;Acc:296271]	-	-
ENSRNOG00000006096	85.4181	151.077	19.7594	0.130791	-2.93467	1.20837e-09	3.6664e-06	5	27986663	28177340	-	5352	Slc26a7	GO:0001696;GO:0001696;GO:0001696;GO:0001696;GO:0005253;GO:0005253;GO:0005254;GO:0005254;GO:0005254;GO:0005737;GO:0005737;GO:0005768;GO:0005768;GO:0005887;GO:0006820;GO:0006820;GO:0006820;GO:0006820;GO:0006820;GO:0006821;GO:0006821;GO:0006821;GO:0008271;GO:0008271;GO:0008271;GO:0008272;GO:0008272;GO:0008272;GO:0008272;GO:0008509;GO:0008509;GO:0015106;GO:0015106;GO:0015106;GO:0015108;GO:0015116;GO:…	K13962	-	P	KOG0236	solute carrier family 26 member 7 [Source:RGD Symbol;Acc:1310846]	297910	D3Z8P6
ENSRNOG00000019822	476.02	131.009	821.032	6.26699	2.64777	1.61475e-09	4.19951e-06	7	11646269	11648322	-	1300	Gadd45b	GO:0000185;GO:0000185;GO:0000185;GO:0000186;GO:0000186;GO:0005634;GO:0005634;GO:0005634;GO:0005634;GO:0005634;GO:0005737;GO:0005737;GO:0005737;GO:0006469;GO:0006469;GO:0043065;GO:0043065;GO:0046330;GO:0046330;GO:0051726;GO:0051726;GO:0051726;GO:0051726;GO:0051726;GO:1900745;GO:1900745;	K04402	-	T;D	09Y9G;0IH6M;1B4GI;0UNF1;13P0G;0DJNU;0V96X;18ZHH;1CUFR	growth arrest and DNA-damage-inducible, beta [Source:RGD Symbol;Acc:1309080]	299626	Q5U3Z2
ENSRNOG00000002832	490.013	788.913	191.114	0.242249	-2.04543	2.06671e-09	4.70305e-06	X	74577131	74706214	-	3251	Slc16a2	GO:0005886;GO:0005887;GO:0005887;GO:0005887;GO:0006520;GO:0006590;GO:0015171;GO:0015349;GO:0015349;GO:0015349;GO:0016020;GO:0016021;GO:0016324;GO:0016324;GO:0022857;GO:0022857;GO:0042403;GO:0055085;GO:0055085;GO:0070327;GO:0070327;GO:0070327;GO:0070327;GO:0070460;GO:0089718;GO:0150104;GO:2000178;	K08231	-	P;G	0V6U3;1AS0H;0DH3J;0UG7E;191HE;09VVF;1CRTS;KOG2504;12P89	solute carrier family 16 member 2 [Source:RGD Symbol;Acc:628608]	259248	Q8K1P8
ENSRNOG00000058645	727.14	224.191	1230.09	5.48678	2.45596	3.86638e-09	7.82084e-06	5	79789671	79874671	-	7213	Tnc	GO:0003674;GO:0005515;GO:0005576;GO:0005576;GO:0005604;GO:0005604;GO:0005614;GO:0005614;GO:0007155;GO:0007155;GO:0007162;GO:0007528;GO:0007528;GO:0008284;GO:0008284;GO:0009611;GO:0009611;GO:0009612;GO:0010628;GO:0010628;GO:0014012;GO:0014012;GO:0031012;GO:0031175;GO:0042060;GO:0042127;GO:0042127;GO:0042475;GO:0045471;GO:0045545;GO:0045545;GO:0060447;GO:0060739;GO:0060739;GO:0060740;GO:0060740;GO:…	K06252	-	-	-	tenascin C [Source:RGD Symbol;Acc:621057]	116640	B2LYI9
ENSRNOG00000017819	296.352	36.4378	556.266	15.2662	3.93227	6.08345e-09	1.1065e-05	18	29560365	29562153	-	1698	Cd14	GO:0001530;GO:0001530;GO:0001530;GO:0001819;GO:0002237;GO:0002237;GO:0002376;GO:0005515;GO:0005515;GO:0005576;GO:0005615;GO:0005794;GO:0005794;GO:0005794;GO:0005886;GO:0005886;GO:0006898;GO:0006898;GO:0006954;GO:0006954;GO:0006954;GO:0009408;GO:0009617;GO:0009617;GO:0009617;GO:0009897;GO:0009897;GO:0009897;GO:0009897;GO:0009986;GO:0016020;GO:0031225;GO:0031362;GO:0031362;GO:0031362;GO:0031663;GO:…	K04391	-	T;W	18TM4;13RSN;0UIW7;09VP7;0V6N2;0DGXI;1B430;0IXG9;1CRMT	CD14 molecule [Source:RGD Symbol;Acc:620588]	60350	Q63691
ENSRNOG00000012779	211.986	43.5496	380.422	8.73538	3.12687	6.68578e-09	1.1065e-05	16	56813791	56900052	-	5876	Msr1	GO:0005044;GO:0006898;GO:0016020;	K06558	-	W	0A0WI;1AYTK;0IK8A;13KR0;1CXF3;0VBT1;0URV4;190AD;0DNHQ	macrophage scavenger receptor 1 [Source:RGD Symbol;Acc:1564316]	498638	-
ENSRNOG00000049495	75.3846	132.339	18.4299	0.139262	-2.84412	1.55868e-08	2.36464e-05	7	143345201	143353925	-	2093	Krt71	GO:0005882;GO:0031069;GO:0031069;GO:0031069;GO:0045095;GO:0045095;GO:0045095;GO:0045095;GO:0045095;GO:0045109;GO:0045109;	K07605	-	Z	13KAE;0DN7K;0VDT9;1CZND;0A2Y1;0IQKP;195DE;1AZQV;0UKI9	keratin 71 [Source:RGD Symbol;Acc:1584538]	683613	D3ZXB7
ENSRNOG00000023546	1986.27	262.12	3710.41	14.1554	3.82328	1.69641e-08	2.37563e-05	12	23839399	23841049	-	879	Hspb1	GO:0001932;GO:0005080;GO:0005634;GO:0005634;GO:0005634;GO:0005737;GO:0005737;GO:0005737;GO:0005819;GO:0005856;GO:0005886;GO:0006469;GO:0008426;GO:0009615;GO:0019901;GO:0030018;GO:0032731;GO:0032760;GO:0035556;GO:0035924;GO:0038033;GO:0042802;GO:0042803;GO:0043122;GO:0043292;GO:0043536;GO:0044183;GO:0045766;GO:0061077;GO:0061629;GO:0099641;GO:1902176;GO:2001028;GO:2001234;	K04455	-	O	1CQAZ;1AZ7Y;09UBS;0V5AU;18YXM;KOG3591;0DFMC;0UKIC;13KJ7	heat shock protein family B (small) member 1 [Source:RGD Symbol;Acc:61306]	24471	G3V913
ENSRNOG00000018086	181.797	296.12	67.4732	0.227857	-2.1338	2.63338e-08	3.42433e-05	1	224800252	224818482	+	2157	Slc22a8	GO:0005452;GO:0006811;GO:0015698;GO:0016020;GO:0016021;GO:0016021;GO:0016021;GO:0016323;GO:0016324;GO:0022857;GO:0022857;GO:0055085;GO:0055085;	K08205	-	I;P	1ASKF;18W64;0UH21;09Y5Y;1CPSX;KOG0255;12QRQ;0DF32;0V595	solute carrier family 22 member 8 [Source:RGD Symbol;Acc:632286]	83500	Q9R1U7
ENSRNOG00000057092	218.774	85.2772	352.27	4.13088	2.04645	5.05881e-08	6.13971e-05	10	70411738	70435156	+	5269	Slfn4	GO:0009617;GO:0016020;GO:0016021;GO:0048286;GO:0009617;GO:0016020;GO:0016021;GO:0048286;	K24457	-	-	-	schlafen 4 [Source:RGD Symbol;Acc:620455]	114247	Q9TPX1
ENSRNOG00000027658	99.1744	167.399	30.95	0.184888	-2.43528	5.88195e-08	6.69255e-05	X	140299770	140303686	-	2186	Gpr101	GO:0004930;GO:0004930;GO:0004930;GO:0004930;GO:0005887;GO:0007165;GO:0007186;GO:0007186;GO:0007186;GO:0016020;GO:0016021;GO:0016021;GO:0016021;GO:0043235;GO:0043235;GO:0071880;	K08423	-	T	KOG3656;1D0SU;1B30G;12SU2;18Z6I;0VEV3;0UGDQ;0DRJM;0A3RW	G protein-coupled receptor 101 [Source:RGD Symbol;Acc:1564196]	317608	D4ABK4
ENSRNOG00000003109	136.332	223.4	49.2646	0.220522	-2.18101	8.95012e-08	9.58452e-05	10	103334052	103340922	-	2749	Btbd17	GO:0005515;	K24808	-	S	0V98G;0DJQQ;12QPX;09YAZ;KOG2075;1CUHP;191CF;0UNHM;1B1AB	BTB domain containing 17 [Source:RGD Symbol;Acc:1563331]	303660	D4A8L9
ENSRNOG00000000239	302.483	2.17786	602.788	276.78	8.11259	1.40318e-07	0.000141916	10	69423086	69424979	+	850	Ccl7	GO:0002548;GO:0005125;GO:0005576;GO:0005576;GO:0005576;GO:0005615;GO:0005615;GO:0005615;GO:0005615;GO:0006935;GO:0006954;GO:0006954;GO:0006955;GO:0006955;GO:0007010;GO:0007010;GO:0007186;GO:0008009;GO:0008009;GO:0008009;GO:0008009;GO:0008009;GO:0008201;GO:0008360;GO:0008360;GO:0010332;GO:0030335;GO:0030335;GO:0030593;GO:0031726;GO:0031726;GO:0031727;GO:0031727;GO:0043547;GO:0048020;GO:0048245;GO:…	K05509	-	W	0DW80;0A9MF;0UWUA;0J1ST;1B71A;0VKCZ;1D5FR;13VZX;196I9	C-C motif chemokine ligand 7 [Source:RGD Symbol;Acc:1359152]	287561	Q9QXY8
ENSRNOG00000007159	1024.66	7.30551	2042.01	279.516	8.12679	1.69753e-07	0.00015484	10	69412017	69413870	+	835	Ccl2	GO:0000165;GO:0001664;GO:0001664;GO:0001666;GO:0001912;GO:0001938;GO:0002523;GO:0002544;GO:0002548;GO:0002548;GO:0002687;GO:0002693;GO:0005125;GO:0005125;GO:0005125;GO:0005576;GO:0005576;GO:0005576;GO:0005576;GO:0005615;GO:0005615;GO:0005615;GO:0005615;GO:0005737;GO:0005791;GO:0006874;GO:0006935;GO:0006954;GO:0006954;GO:0006954;GO:0006955;GO:0006955;GO:0007010;GO:0007179;GO:0007186;GO:0007568;GO:…	K14624	-	W	0A9MF;0J1ST;0VKCZ;13VZX;1D54A;0DVIR;0UW9M;1B6T0;1942X	C-C motif chemokine ligand 2 [Source:RGD Symbol;Acc:3645]	24770	P14844
ENSRNOG00000043451	504.832	142.434	867.23	6.08863	2.60612	1.70107e-07	0.00015484	14	6673686	6679901	-	1519	Spp1	GO:0001503;GO:0005178;GO:0005615;GO:0005794;GO:0006710;GO:0007155;GO:0007155;GO:0033280;GO:0045893;GO:0071394;GO:2000866;GO:0001503;GO:0007155;	K06250	-	W	1933G;1B1CS;13I3U;0IVP1;0UPAR;0DMXE;0VGDG;09UE0;1D2CJ	secreted phosphoprotein 1 [Source:RGD Symbol;Acc:3752]	25353	P08721
ENSRNOG00000011145	56.2326	98.6442	13.821	0.14011	-2.83537	2.0864e-07	0.000180871	4	85286372	85329362	-	3027	Crhr2	GO:0004888;GO:0004888;GO:0004930;GO:0004930;GO:0005886;GO:0007166;GO:0007166;GO:0007186;GO:0007186;GO:0016020;GO:0016020;GO:0016020;GO:0016021;GO:0016021;GO:0016021;GO:0004888;GO:0004888;GO:0004930;GO:0004930;GO:0004930;GO:0004930;GO:0005179;GO:0005783;GO:0005791;GO:0005794;GO:0005886;GO:0005886;GO:0005886;GO:0007015;GO:0007165;GO:0007166;GO:0007166;GO:0007186;GO:0007186;GO:0007186;GO:0007186;GO:…	K04579	-	T	12QXI;0V77P;0DHIN;09W9C;KOG4564;1CS8V;190D1;0UQYA;1B13Y	corticotropin releasing hormone receptor 2 [Source:RGD Symbol;Acc:70547]	64680	P47866
ENSRNOG00000007102	626.071	963.504	288.638	0.299572	-1.73903	2.35981e-07	0.000195274	3	146420346	146470293	-	3595	Acss1	GO:0000166;GO:0003987;GO:0003987;GO:0003987;GO:0003987;GO:0003987;GO:0003987;GO:0003987;GO:0005524;GO:0005739;GO:0005759;GO:0005759;GO:0005759;GO:0006085;GO:0006085;GO:0006085;GO:0016208;GO:0016208;GO:0016874;GO:0019413;GO:0019427;GO:0019427;GO:0019542;GO:0050218;GO:0050218;GO:0050218;GO:0050218;	K01895	EC:6.2.1.1	I	1CPRT;0UG6K;KOG1175;0V4QZ;09TRN;18SZ8;1B23Y;0DF20;12NC2	acyl-CoA synthetase short-chain family member 1 [Source:RGD Symbol;Acc:1306246]	296259	D3ZZN3
ENSRNOG00000002159	277.632	116.742	438.522	3.75634	1.90933	2.61678e-07	0.000207124	14	10343282	10395047	-	3048	Gpat3	GO:0003841;GO:0005783;GO:0005783;GO:0005789;GO:0006072;GO:0008654;GO:0016746;GO:0019432;GO:0019432;GO:0032006;	K13506	EC:2.3.1.15	I	1ATY2;0V5QH;0DG0R;12PYI;KOG2898;18SVM;09UQX;0UIE5;1CQQB	glycerol-3-phosphate acyltransferase 3 [Source:RGD Symbol;Acc:1565703]	305166	Q4V8J4
ENSRNOG00000002905	52.1493	13.0765	91.2222	6.97606	2.80241	3.08829e-07	0.00023426	10	90984227	90987823	+	1152	Ccdc103	GO:0001947;GO:0001947;GO:0003341;GO:0003341;GO:0003351;GO:0005576;GO:0005737;GO:0005929;GO:0007368;GO:0030030;GO:0031514;GO:0036157;GO:0036157;GO:0036158;GO:0036158;GO:0036159;GO:0036159;GO:0036159;GO:0042803;GO:0042803;GO:0042995;GO:0070286;GO:0070286;GO:0070286;GO:0070286;GO:0071907;GO:0071907;GO:0001947;GO:0003341;GO:0003351;GO:0005576;GO:0005737;GO:0005929;GO:0007368;GO:0030030;GO:0031514;GO:…	K23731	-	S	0VEHF;18VCV;0INY9;1CYQ0;0DI91;1B48Z;13M61;0A3NM;0UFIY	coiled-coil domain containing 103 [Source:RGD Symbol;Acc:1562370]	498006	D3Z8H9
ENSRNOG00000002418	664.266	1017.02	311.515	0.306303	-1.70697	3.7131e-07	0.000270388	13	105039853	105141030	-	4317	Tgfb2	GO:0000902;GO:0000902;GO:0001540;GO:0001540;GO:0001654;GO:0001654;GO:0001666;GO:0001837;GO:0001837;GO:0001942;GO:0001942;GO:0003007;GO:0003007;GO:0005102;GO:0005102;GO:0005114;GO:0005114;GO:0005160;GO:0005160;GO:0005160;GO:0005160;GO:0005576;GO:0005576;GO:0005576;GO:0005615;GO:0005615;GO:0005615;GO:0005615;GO:0005615;GO:0006468;GO:0006468;GO:0007050;GO:0007050;GO:0007165;GO:0007179;GO:0007179;GO:…	K13376	-	T	KOG3900	transforming growth factor, beta 2 [Source:RGD Symbol;Acc:70491]	81809	Q07257
ENSRNOG00000012302	1023.45	1749.98	296.916	0.169669	-2.55921	4.34154e-07	0.000303373	2	181045703	181102918	-	4587	Gucy1a1	GO:0000166;GO:0004383;GO:0004383;GO:0004383;GO:0004383;GO:0004383;GO:0005525;GO:0005737;GO:0005829;GO:0006182;GO:0006182;GO:0006182;GO:0006182;GO:0008074;GO:0008217;GO:0009190;GO:0009190;GO:0010750;GO:0016829;GO:0016849;GO:0016849;GO:0020037;GO:0020037;GO:0035556;GO:0035556;GO:0060087;GO:0098925;GO:0098978;GO:0098982;	K12318	EC:4.6.1.2	F	1CRZY;12NXE;KOG4171;1AWMH;0UJCG;0DEMR;0A1DS;18ZD8;0V5S9	guanylate cyclase 1 soluble subunit alpha 1 [Source:RGD Symbol;Acc:68436]	497757	Q5U330
ENSRNOG00000008736	52.4368	13.8112	91.0623	6.59336	2.72101	4.49936e-07	0.000303373	13	90967739	90977734	-	2526	Slamf8	GO:0002232;GO:0002336;GO:0010760;GO:0016020;GO:0016021;GO:0033860;GO:0035690;GO:0038023;GO:0042742;GO:0042802;GO:0043549;GO:0045577;GO:0060266;GO:0090027;GO:0090383;GO:1902623;GO:2000509;	K16853	-	S;T	0IVMT;0VFS6;1B38D;18Z8N;12QUS;1D1MY;0DSCJ;0US0C;0A4VK	SLAM family member 8 [Source:RGD Symbol;Acc:1306263]	289237	D3ZS24
ENSRNOG00000003546	361.589	59.3309	663.847	11.1889	3.484	5.65277e-07	0.00034877	10	12995904	12997930	-	963	Tnfrsf12a	GO:0001726;GO:0005515;GO:0005886;GO:0005886;GO:0005886;GO:0005886;GO:0006931;GO:0007155;GO:0009986;GO:0016020;GO:0016021;GO:0043065;GO:0043065;GO:0043065;GO:0043065;GO:0045765;GO:0045773;GO:0061041;GO:0061041;GO:0097191;GO:2001238;GO:2001238;GO:2001238;	K05149	-	T	0IYHX;193HS;0A898;1B683;0DV15;0VJ50;0UW5T;1D4KA;13SI8	TNF receptor superfamily member 12A [Source:RGD Symbol;Acc:631329]	302965	Q80XX9
ENSRNOG00000020298	616.492	230.962	1002.02	4.33847	2.11719	5.68558e-07	0.00034877	1	199941161	199965191	+	2425	Bag3	GO:0000045;GO:0000774;GO:0000774;GO:0000774;GO:0001725;GO:0005515;GO:0005634;GO:0005634;GO:0005634;GO:0005737;GO:0005737;GO:0005737;GO:0005829;GO:0005829;GO:0005886;GO:0007420;GO:0008625;GO:0008625;GO:0010664;GO:0010664;GO:0010664;GO:0010664;GO:0016020;GO:0021510;GO:0030018;GO:0030018;GO:0031072;GO:0034605;GO:0034605;GO:0034620;GO:0034620;GO:0042307;GO:0042307;GO:0043005;GO:0043066;GO:0044877;GO:…	K09557	-	O;T	190E8;KOG4361;0VABT;KOG0940;09ZER;0DKX1;0UPZ2;1CVS9;12TKZ;1AZNI	Bcl2-associated athanogene 3 [Source:RGD Symbol;Acc:1307794]	293524	Q5U2U8
ENSRNOG00000017712	55.8584	96.3228	15.3941	0.159817	-2.6455	5.74738e-07	0.00034877	2	30125249	30127269	-	840	Cartpt	GO:0000186;GO:0000186;GO:0000186;GO:0000186;GO:0000186;GO:0001678;GO:0001678;GO:0001678;GO:0001696;GO:0005184;GO:0005184;GO:0005515;GO:0005576;GO:0005615;GO:0005615;GO:0005615;GO:0005615;GO:0005615;GO:0005615;GO:0005615;GO:0007186;GO:0007186;GO:0007186;GO:0007186;GO:0007186;GO:0007218;GO:0007268;GO:0008343;GO:0008343;GO:0008343;GO:0008343;GO:0008343;GO:0009267;GO:0009267;GO:0009267;GO:0009267;GO:…	-	-	W;T	0A8I8;0J0KJ;193DW;1D4AE;13UF6;0UW06;1B6FX;0DUZG;0VJEN	CART prepropeptide [Source:RGD Symbol;Acc:2272]	29131	P49192
ENSRNOG00000039759	139.746	223.654	55.8379	0.249662	-2.00195	7.95953e-07	0.00046743	X	10023489	10031167	-	1299	Gpr34	GO:0004930;GO:0004930;GO:0004930;GO:0007165;GO:0007186;GO:0007186;GO:0007186;GO:0007186;GO:0016020;GO:0016021;GO:0016021;GO:0016021;GO:0035589;GO:0045028;	K08383	-	T	18XF3;09W0W;12V1H;0UJCK;0DHA5;1CS01;1AUVU;0V6Z9;0IH53	G protein-coupled receptor 34 [Source:RGD Symbol;Acc:1563681]	554353	Q6XCE7
ENSRNOG00000013902	135.703	217.024	54.3825	0.250583	-1.99664	1.019e-06	0.000579715	2	149441598	149444548	-	1254	P2ry12	GO:0001609;GO:0001621;GO:0001621;GO:0004930;GO:0005886;GO:0006930;GO:0007186;GO:0007186;GO:0007188;GO:0007193;GO:0007596;GO:0016021;GO:0030168;GO:0031224;GO:0031253;GO:0043270;GO:0044298;GO:0045028;GO:0070527;GO:0071318;GO:0071407;GO:0150063;GO:1904139;	K04298	-	T;P	1CT99;09X78;0IFYD;0DIIP;1AZG8;0V85U;12QCX;18YWI;0UM35	purinergic receptor P2Y12 [Source:RGD Symbol;Acc:621681]	64803	Q9EPX4
ENSRNOG00000014797	1568.24	497.49	2639	5.30462	2.40725	1.06214e-06	0.000585948	9	81569289	81586553	-	3712	Tmbim1	GO:0005123;GO:0005123;GO:0005123;GO:0005765;GO:0005765;GO:0005794;GO:0005794;GO:0005794;GO:0010008;GO:0010008;GO:0016020;GO:0016021;GO:0043086;GO:0043086;GO:0043231;GO:1902042;GO:1902042;GO:1902042;GO:1902045;GO:1902045;GO:1902045;GO:1903077;GO:1903077;GO:1903077;GO:2000504;GO:2000504;GO:0005123;GO:0005765;GO:0005794;GO:0010008;GO:0016020;GO:0016021;GO:0043086;GO:1902042;GO:1902045;GO:1903077;GO:…	K24205	-	T	1CV44;0A48Z;13KHB;0UP78;0VCZI;0DKA5;1AYSJ;KOG2322;191FS	transmembrane BAX inhibitor motif containing 1 [Source:RGD Symbol;Acc:1359409]	316516	Q6AYE0
ENSRNOG00000011316	77.7356	25.9205	129.551	4.99799	2.32135	1.14731e-06	0.000614319	15	46613810	46643772	+	4023	Fam167a	-	-	-	S	0UPY1;191GX;1CVQV;0VAAC;09ZDC;13K6I;0IIXX;0DKVP;1AYU1	family with sequence similarity 167, member A [Source:RGD Symbol;Acc:1561302]	498533	D3ZQX1
ENSRNOG00000006940	75.9596	21.4253	130.494	6.09064	2.60659	1.20715e-06	0.000627893	7	119482272	119499425	+	1496	Ncf4	GO:0005515;GO:0005737;GO:0005737;GO:0005737;GO:0005829;GO:0006801;GO:0006909;GO:0006909;GO:0010008;GO:0010008;GO:0016020;GO:0016020;GO:0016175;GO:0016175;GO:0016176;GO:0016176;GO:0016176;GO:0016176;GO:0016176;GO:0032266;GO:0032266;GO:0035091;GO:0035091;GO:0042554;GO:0043020;GO:0043020;GO:0043020;GO:0043020;GO:0043020;GO:0045730;GO:0045730;GO:0060090;	K08012	-	C	197B1;0B580;0WHUJ;1DFP4;0E8S1;0V3EH;0IRR2;1BB78;13EBX	neutrophil cytosolic factor 4 [Source:RGD Symbol;Acc:1593157]	500904	B2RZ98
ENSRNOG00000019474	170.948	269.921	71.9748	0.266651	-1.90697	1.47315e-06	0.000744964	9	17225122	17245093	+	1126	Rsph9	GO:0003341;GO:0005930;GO:0005930;GO:0031514;GO:0035082;GO:0035082;GO:0044458;GO:0060294;GO:0062177;GO:0097729;GO:1904158;GO:0001534;GO:0001534;GO:0003341;GO:0003341;GO:0003341;GO:0005737;GO:0005856;GO:0005930;GO:0005930;GO:0005930;GO:0005930;GO:0031514;GO:0031514;GO:0035082;GO:0035082;GO:0035082;GO:0035082;GO:0044458;GO:0060271;GO:0060271;GO:0060294;GO:0060294;GO:0060294;GO:0062177;GO:0062177;GO:…	K19757	-	Z;S	0IH9Y;09UCR;13MAV;0UH1N;1AY7G;0DFNE;1CQBY;0V5BZ	radial spoke head component 9 [Source:RGD Symbol;Acc:1310693]	316238	D4A5Y7
ENSRNOG00000050997	1067.63	542.397	1592.86	2.93671	1.5542	1.59992e-06	0.000787202	6	60132024	60151420	-	1791	Ifrd1	GO:0005634;GO:0005737;GO:0014706;GO:0030517;GO:0042692;GO:0043403;GO:0048671;	-	-	Z	0DF0F;0V4P9;12NEI;191T8;09TQ4;1CPQ6;1B4E2;0UGAR;KOG2842	interferon-related developmental regulator 1 [Source:RGD Symbol;Acc:2867]	29596	P20695;Q5XIV9
ENSRNOG00000052051	70.0118	119.344	20.6795	0.173277	-2.52885	1.69369e-06	0.000811412	8	70408528	70436028	-	5899	Slc24a1	GO:0005886;GO:0006816;GO:0006874;GO:0007601;GO:0008273;GO:0008273;GO:0016021;GO:0035725;GO:0055085;GO:0070588;GO:0071805;	K13749	-	-	-	solute carrier family 24 member 1 [Source:RGD Symbol;Acc:620080]	56814	Q9QZM6
ENSRNOG00000000699	210.804	327.365	94.2431	0.287884	-1.79644	2.02433e-06	0.000944945	12	48577905	48579196	+	1266	Selplg	-	-	-	U	1BBIZ;0WJ52;13G41;197GW;0V3WD;0B6EU;0ITN9;0E9IK;1DGDN	selectin P ligand [Source:RGD Symbol;Acc:1307971]	-	-
ENSRNOG00000008215	316.782	150.404	483.16	3.21243	1.68366	2.25982e-06	0.0010285	10	104654717	104659188	-	2198	Trim47	GO:0004842;GO:0004842;GO:0004842;GO:0005829;GO:0008270;GO:0008270;GO:0016567;GO:0016567;GO:0016567;GO:0046872;	K12023	-	O	0A1J2;0VCET;18SZS;0UJVK;0DP4V;13HCI;1CY2X;0IJ9G;1B01C	tripartite motif-containing 47 [Source:RGD Symbol;Acc:1597317]	690374	D3ZA22
ENSRNOG00000019728	660.353	284.45	1036.26	3.64302	1.86513	2.65252e-06	0.00117779	1	199495298	199623960	+	7433	Itgam	GO:0005615;GO:0005886;GO:0007155;GO:0008305;GO:0009986;GO:0010668;GO:0031072;GO:0032930;GO:0043315;GO:0044853;GO:0001774;GO:0001781;GO:0001846;GO:0001851;GO:0002523;GO:0005615;GO:0005634;GO:0005886;GO:0006898;GO:0006909;GO:0006911;GO:0007155;GO:0007155;GO:0007155;GO:0007155;GO:0007159;GO:0007229;GO:0008201;GO:0008305;GO:0008305;GO:0009897;GO:0009986;GO:0010668;GO:0014005;GO:0016020;GO:0016021;GO:…	K06461	-	W	1DEZI;0WGDS;1974J;0B3YP;0V2Z3;1BAVT;13CB3;0E803;0IPBA	integrin subunit alpha M [Source:RGD Symbol;Acc:2926]	25021	Q9JI30
ENSRNOG00000036865	28.8247	51.9418	5.70755	0.109884	-3.18595	2.89479e-06	0.00125475	7	143461423	143473783	-	2964	Krt77	GO:0005856;GO:0005882;GO:0045095;GO:0045095;GO:0045095;	K07605	-	Z	190AC;1CVNE;13N8I;0DKTI;0UPV3;0VA8D;0IVT1;1AZI7;09ZB7	keratin 77 [Source:RGD Symbol;Acc:1302968]	406226	Q6IG01
ENSRNOG00000010645	395.445	110.437	680.453	6.16148	2.62328	3.29736e-06	0.00139601	15	24141651	24165537	+	1086	Lgals3	GO:0001772;GO:0002376;GO:0002548;GO:0005576;GO:0005634;GO:0005634;GO:0005681;GO:0005737;GO:0005737;GO:0005743;GO:0008380;GO:0019863;GO:0019863;GO:0019903;GO:0030246;GO:0030246;GO:0030246;GO:0030593;GO:0030855;GO:0031334;GO:0042056;GO:0042129;GO:0043236;GO:0045087;GO:0045806;GO:0048245;GO:0048246;GO:0050918;GO:0070232;GO:0071674;GO:0071677;GO:0090280;GO:1902041;GO:1903078;GO:2001237;GO:0002376;GO:…	K06831	-	W	1D159;0A4D8;192VW;0UGPC;0VF81;1ASDY;13MYU;KOG3587;0DF7M	galectin 3 [Source:RGD Symbol;Acc:69356]	83781	P08699
ENSRNOG00000025075	224.097	104.093	344.101	3.30571	1.72496	3.7459e-06	0.00154987	1	165884407	165901923	-	2770	Relt	GO:0005515;GO:0005654;GO:0006915;GO:0006915;GO:0006915;GO:0016020;GO:0016021;GO:0097186;GO:0097186;GO:0097186;GO:0097186;GO:0005515;GO:0006915;GO:0006915;GO:0016020;GO:0016021;GO:0097186;GO:0097186;	K05156	-	T	1AU4V;0DHHY;13KSE;09XX0;0IKJV;1CS86;18YEG;0UJQB;0V5NR	RELT, TNF receptor [Source:RGD Symbol;Acc:1305381]	361615	F1LVW5
ENSRNOG00000014838	79.037	17.0175	141.057	8.28894	3.05119	3.94406e-06	0.00159559	5	59416076	59446647	+	920	Glipr2	GO:0000139;GO:0005576;GO:0010634;GO:0010718;GO:0042803;GO:0070374;	K24835	-	S;T	0DNDW;18UA2;12TIJ;1CXB4;KOG3017;0A2BQ;0URQZ;1B2EQ;0VEM6	GLI pathogenesis-related 2 [Source:RGD Symbol;Acc:1583669]	679819	-
ENSRNOG00000008334	399.07	601.668	196.472	0.326546	-1.61464	4.05023e-06	0.00160292	5	159540421	159583049	-	7187	Crocc	GO:0001917;GO:0003779;GO:0005198;GO:0005200;GO:0005813;GO:0005814;GO:0005814;GO:0005829;GO:0005886;GO:0007098;GO:0007098;GO:0008104;GO:0010457;GO:0010669;GO:0015629;GO:0019894;GO:0032053;GO:0033365;GO:0035253;GO:0035253;GO:0045494;GO:0045724;GO:0051656;GO:0097729;GO:0120219;GO:1903566;GO:0007098;GO:0035253;	K16469	-	Z;S	0V8DF;18TRH;12QI5;1B2VX;0IFAN;0DMD8;0UPA7;1CXRV;09XBI	ciliary rootlet coiled-coil, rootletin [Source:RGD Symbol;Acc:1305364]	313663	D4AD05
ENSRNOG00000013945	358.9	179.475	538.325	2.99945	1.5847	5.75761e-06	0.00223015	1	84018859	84040433	-	3291	Itpkc	GO:0000166;GO:0000828;GO:0005516;GO:0005524;GO:0005634;GO:0005634;GO:0005737;GO:0005737;GO:0008440;GO:0008440;GO:0008440;GO:0008440;GO:0016301;GO:0016301;GO:0016301;GO:0016301;GO:0016301;GO:0016310;GO:0016740;GO:0032958;GO:0032958;GO:0032958;GO:0046854;	K00911	EC:2.7.1.127	I	0DETR;KOG1621;0UFV3;09X5Z;1CPHH;18VPA;0V5G0;12Q5E;1ARPZ	inositol-trisphosphate 3-kinase C [Source:RGD Symbol;Acc:631336]	308451	Q80ZG2
ENSRNOG00000043416	129.461	20.2853	238.636	11.764	3.55631	6.27201e-06	0.00235697	1	80730499	80744831	-	1885	Bcl3	GO:0005515;GO:0005634;GO:0005654;GO:0005737;GO:0005829;GO:0005886;GO:0006351;GO:0006974;GO:0007249;GO:0008134;GO:0009615;GO:0010225;GO:0030330;GO:0030496;GO:0032717;GO:0032991;GO:0032996;GO:0033257;GO:0042771;GO:0042981;GO:0043066;GO:0043231;GO:0045727;GO:0045892;GO:0045893;GO:0046426;GO:0051101;GO:1901222;	K09258	-	S;K;E	192I2;13MDS;1CTIZ;KOG0504;0VD0G;1AWHJ;0A24Y;0UT49;0DPT6	BCL3, transcription coactivator [Source:RGD Symbol;Acc:1589465]	680611	-
ENSRNOG00000010833	156.096	70.7871	241.404	3.41029	1.76989	6.34395e-06	0.00235697	4	115004448	115015965	-	2061	Mthfd2	GO:0000287;GO:0000287;GO:0003674;GO:0003824;GO:0003824;GO:0004477;GO:0004477;GO:0004477;GO:0004487;GO:0004487;GO:0004487;GO:0004488;GO:0004488;GO:0004488;GO:0004488;GO:0004488;GO:0005575;GO:0005739;GO:0005739;GO:0006730;GO:0008150;GO:0016787;GO:0035999;GO:0042301;GO:0042301;GO:0046653;GO:0046653;GO:0055114;	K13403	-	H	18UDZ;KOG0089;1AUTU;0DKXC;0APE9;1CVSJ;0W1R2;12RHN;0UG7R	methylenetetrahydrofolate dehydrogenase (NADP+ dependent) 2, methenyltetrahydrofolate cyclohydrolase [Source:RGD Symbol;Acc:1311313]	680308	D4A1Y5
ENSRNOG00000019810	211.386	100.699	322.073	3.19836	1.67733	7.39792e-06	0.00269358	9	82556573	82564294	+	2176	Des	GO:0005634;GO:0005737;GO:0005856;GO:0005882;GO:0005882;GO:0005882;GO:0005882;GO:0005911;GO:0005916;GO:0008092;GO:0014704;GO:0030018;GO:0030018;GO:0031594;GO:0042383;GO:0042383;GO:0042802;GO:0043292;GO:0045109;GO:0045111;GO:0097512;	K07610	-	Z	1CU69;0UGTY;18TDT;09YCR;12RK9;1ASHR;0V9A9;0DJSK;0IFZ1	desmin [Source:RGD Symbol;Acc:620686]	64362	P48675;Q6P725
ENSRNOG00000000281	851.432	1246.58	456.284	0.366029	-1.44997	8.00403e-06	0.00285712	11	87058616	87075785	+	2338	Prodh1	GO:0004657;GO:0005739;GO:0006562;GO:0004657;GO:0006562;	K00318	EC:1.5.5.2	E	0DF0Q;18SNH;KOG0186;1B1HY;0UG4V;09TQE;1CPQH;0V4PN;12S69	proline dehydrogenase 1 [Source:RGD Symbol;Acc:1590932]	680409	-
ENSRNOG00000017212	785.618	418.116	1153.12	2.75789	1.46357	1.04217e-05	0.00364861	5	166913735	166926636	-	2989	Spsb1	GO:0005515;GO:0005829;GO:0005829;GO:0006511;GO:0006511;GO:0016567;GO:0016567;GO:0016567;GO:0019005;GO:0043161;GO:1990756;GO:1990756;GO:0005515;GO:0005829;GO:0006511;GO:0016567;GO:0016567;GO:0019005;GO:0043161;GO:1990756;	K10343	-	O;J	KOG3953;1CRWB;0V6W6;12P0S;0DH66;09VXP	splA/ryanodine receptor domain and SOCS box containing 1 [Source:RGD Symbol;Acc:1309319]	313722	B0BMX8
ENSRNOG00000036703	119.084	11.4268	226.741	19.8428	4.31055	1.10497e-05	0.00379546	1	199555722	199576932	+	4673	Itgax	GO:0007155;GO:0008284;GO:0008305;GO:0009897;GO:0009986;GO:0010628;GO:0010628;GO:0030335;GO:0030971;GO:0031643;GO:0034113;GO:0045766;GO:0051607;GO:1905956;	K06462	-	W	1DEZI;0WGDS;1974K;0B3YP;0V2Z3;1BAVV;13CB3;0E803;0IPBA	integrin subunit alpha X [Source:RGD Symbol;Acc:1561123]	499271	-
ENSRNOG00000001469	345.505	175.773	515.237	2.93126	1.55152	1.2767e-05	0.00430413	12	24978483	25021863	+	3588	Eln	GO:0003151;GO:0005201;GO:0005201;GO:0005576;GO:0007519;GO:0030198;GO:0030833;GO:0043149;GO:0050840;GO:0062023;GO:0062023;GO:0071953;GO:0071953;GO:0005201;GO:0005201;GO:0005576;GO:0062023;GO:0062023;	K14211	-	Z;O;W	0UW7Z;0DVKN;147W8;0A9RM;0VKP5;1B71I;1D4X0;196DQ;0IZT8	elastin [Source:RGD Symbol;Acc:67394]	25043	Q99372;D4A9U4
ENSRNOG00000007477	45.4082	77.0107	13.8057	0.17927	-2.47979	1.31384e-05	0.00434882	3	172856733	172880450	+	1908	Edn3	GO:0005576;GO:0005576;GO:0005576;GO:0019229;GO:0019229;GO:0042310;	K05227	-	W;T	0IXXK;1B4X9;0UUDD;0VHJ2;0A6R7;13SBF;1D32N;193BF;0DT77	endothelin 3 [Source:RGD Symbol;Acc:2534]	366270	P13207
ENSRNOG00000012049	79.1274	12.1727	146.082	12.0008	3.58506	1.50084e-05	0.00487907	15	47293699	47300460	+	3282	Sox7	GO:0000976;GO:0000976;GO:0000978;GO:0000981;GO:0000981;GO:0000981;GO:0001706;GO:0001706;GO:0003674;GO:0003700;GO:0003700;GO:0003700;GO:0005575;GO:0005634;GO:0005634;GO:0005634;GO:0005737;GO:0005737;GO:0005737;GO:0006355;GO:0006357;GO:0006357;GO:0008150;GO:0008285;GO:0008285;GO:0009653;GO:0030154;GO:0043280;GO:0043280;GO:0043565;GO:0043565;GO:0045892;GO:0045892;GO:0045893;GO:0045893;GO:0060828;GO:…	K09270	-	K	0B4CG;0V33M;1BAYX;13CXF;0WGV4;0E883;1976H;0IPZD;1DF6W	SRY-box transcription factor 7 [Source:RGD Symbol;Acc:1310038]	290317	D3ZTE1
ENSRNOG00000022116	835.024	1230.05	439.999	0.357709	-1.48314	1.75517e-05	0.00560577	15	37400889	37410848	-	1803	Gjb6	GO:0003674;GO:0005243;GO:0005243;GO:0005829;GO:0005884;GO:0005886;GO:0005921;GO:0005921;GO:0005922;GO:0005922;GO:0005922;GO:0006915;GO:0007154;GO:0007154;GO:0007267;GO:0007568;GO:0007605;GO:0008017;GO:0008285;GO:0010644;GO:0016020;GO:0016021;GO:0016264;GO:0016324;GO:0030054;GO:0032496;GO:0042471;GO:0048487;GO:0048839;GO:0051015;GO:0051602;GO:0055085;GO:0071333;GO:1903763;GO:1990349;GO:0003674;GO:…	K07625	-	T	0UMBQ;12R0F;1CUES;0DJMX;0IFM8;09Y6S;1AYZM;0V7CT;18THC	gap junction protein, beta 6 [Source:RGD Symbol;Acc:621830]	84403	Q9R140
ENSRNOG00000003840	580.001	872.304	287.697	0.329813	-1.60028	1.98758e-05	0.00623862	14	66831848	67170361	-	7665	Slit2	GO:0001657;GO:0001933;GO:0002042;GO:0002689;GO:0005095;GO:0005509;GO:0005515;GO:0005615;GO:0005737;GO:0007411;GO:0008045;GO:0008201;GO:0010593;GO:0010596;GO:0014912;GO:0021836;GO:0021972;GO:0030308;GO:0030336;GO:0030837;GO:0031290;GO:0032870;GO:0035385;GO:0042802;GO:0042803;GO:0043065;GO:0043116;GO:0043237;GO:0043394;GO:0048495;GO:0048754;GO:0048846;GO:0050919;GO:0050929;GO:0051058;GO:0051414;GO:…	K06839	-	T	1AW0U;18WXT;KOG4237;0VBMR;0A0RC;1CX9Y;0DNCR;12U4V;0UTKX	slit guidance ligand 2 [Source:RGD Symbol;Acc:69310]	360272	F1MA79
ENSRNOG00000014524	636.487	165.612	1107.36	6.68651	2.74125	2.14178e-05	0.00660866	17	13799383	13812704	-	3695	S1pr3	GO:0003376;GO:0004930;GO:0004930;GO:0004930;GO:0004930;GO:0005178;GO:0005178;GO:0005737;GO:0005886;GO:0005886;GO:0005886;GO:0005886;GO:0006954;GO:0006954;GO:0007165;GO:0007186;GO:0007186;GO:0007186;GO:0007189;GO:0007193;GO:0007193;GO:0007219;GO:0007219;GO:0016020;GO:0016021;GO:0016021;GO:0016021;GO:0019222;GO:0032651;GO:0032651;GO:0038036;GO:0038036;GO:1903141;GO:1903141;GO:0003376;GO:0004930;GO:…	K04290	-	T	13190;0DENT;1B52I;09TH0;0IIA7;1CPCM;0V4G0;18U1G;0UFVA	sphingosine-1-phosphate receptor 3 [Source:RGD Symbol;Acc:1583843]	306792	F1M9D3
ENSRNOG00000018911	1580.95	809.402	2352.5	2.90647	1.53927	2.2212e-05	0.0067395	17	70684134	70713726	+	4717	Pfkfb3	GO:0000166;GO:0003824;GO:0003824;GO:0003824;GO:0003873;GO:0003873;GO:0003873;GO:0003873;GO:0003873;GO:0004331;GO:0004331;GO:0004331;GO:0004331;GO:0005524;GO:0005524;GO:0005524;GO:0005654;GO:0005829;GO:0006000;GO:0006000;GO:0006003;GO:0006003;GO:0006003;GO:0006003;GO:0006110;GO:0007420;GO:0008152;GO:0016301;GO:0016310;GO:0016311;GO:0016740;GO:0016787;GO:0046835;GO:0000166;GO:0003824;GO:0003824;GO:…	K01103	-	G	1CUMN;0UGYH;09UK4;0DFVS;12R0U;1B4WH;18VXZ;0V5JD;KOG0234	6-phosphofructo-2-kinase/fructose-2,6-biphosphatase 3 [Source:RGD Symbol;Acc:619776]	117276	O35552
ENSRNOG00000000187	589.535	90.6943	1088.38	12.0005	3.58502	2.4878e-05	0.00742465	7	119554354	119568776	+	3333	Csf2rb	GO:0004896;GO:0005515;GO:0016020;GO:0016021;GO:0019221;	K04738	-	W;T	0UI7U;0IGEX;1B2E2;0VATT;1CWB6;12RW9;09Z09;0DMFV;1955X	colony stimulating factor 2 receptor beta common subunit [Source:RGD Symbol;Acc:620189]	171081	Q78ZF5
ENSRNOG00000059947	173.969	28.8907	319.048	11.0433	3.4651	2.61167e-05	0.00766862	6	33885495	33908016	+	3067	Sdc1	GO:0008022;GO:0009897;GO:0009986;GO:0009986;GO:0016020;GO:0042060;GO:0042802;GO:0048627;GO:0055002;GO:0060070;GO:1903543;GO:1903553;	K06257	-	-	-	syndecan 1 [Source:RGD Symbol;Acc:3648]	25216	P26260
ENSRNOG00000049580	33.6124	59.4129	7.81184	0.131484	-2.92704	2.65627e-05	0.00767579	20	45813169	45815940	-	2237	Gpr6	GO:0004930;GO:0007186;GO:0007204;GO:0016021;GO:0038036;	K04313	-	T	KOG3656;09XND;1CT9U;1B57H;0V8K3;0UUIU;19100;0DJ04;12TYS	G protein-coupled receptor 6 [Source:RGD Symbol;Acc:70939]	83683	P51651
ENSRNOG00000006094	1141.77	242.19	2041.36	8.42875	3.07532	2.74635e-05	0.00781207	3	92696313	92783658	-	3973	Cd44	GO:0004896;GO:0005540;GO:0005540;GO:0005540;GO:0005794;GO:0005829;GO:0005886;GO:0005902;GO:0007155;GO:0007155;GO:0007155;GO:0009986;GO:0016020;GO:0016021;GO:0016021;GO:0016021;GO:0016324;GO:0016477;GO:0019221;GO:0030214;GO:0031258;GO:0033138;GO:0034116;GO:0035692;GO:0042110;GO:0042995;GO:0042995;GO:0043066;GO:0043154;GO:0043518;GO:0044319;GO:0044344;GO:0050731;GO:0051216;GO:0070374;GO:0070487;GO:…	K06256	-	W;T	1B3SZ;18UX2;1CUI9;0UNIM;13SK8;0DJR6;09YBF;0V990;0IZCP	CD44 molecule (Indian blood group) [Source:RGD Symbol;Acc:2307]	25406	O08779
ENSRNOG00000012280	656.031	28.7455	1283.32	44.6441	5.4804	3.16705e-05	0.00887017	2	158097843	158103653	+	1924	Ptx3	GO:0001550;GO:0001550;GO:0001849;GO:0001849;GO:0001849;GO:0001872;GO:0001872;GO:0001878;GO:0001878;GO:0005615;GO:0005615;GO:0005615;GO:0008228;GO:0008228;GO:0030198;GO:0030198;GO:0031012;GO:0031012;GO:0042802;GO:0042802;GO:0044793;GO:0044869;GO:0044869;GO:0044871;GO:0044871;GO:0045087;GO:0045087;GO:0045087;GO:0045087;GO:0045087;GO:0045429;GO:0045429;GO:0046597;GO:0046597;GO:0046790;GO:0046790;GO:…	-	-	U	1ARH7;0USD5;1CRK4;0A2FB;0DQ2G;0IHCT;0VD2S;18WWI;12U05	pentraxin 3 [Source:RGD Symbol;Acc:1593476]	689388	D3ZT94
ENSRNOG00000014117	1127.94	112.853	2143.04	18.9897	4.24714	3.34599e-05	0.00922935	19	14508616	14515456	+	1566	Hmox1	GO:0002246;GO:0004392;GO:0004392;GO:0005198;GO:0005634;GO:0005783;GO:0006788;GO:0006788;GO:0006879;GO:0006979;GO:0016239;GO:0016242;GO:0020037;GO:0034101;GO:0034395;GO:0034605;GO:0035094;GO:0042167;GO:0042168;GO:0042802;GO:0042803;GO:0043065;GO:0045766;GO:0048471;GO:0048661;GO:0048662;GO:0055072;GO:0055114;GO:0071243;GO:0071276;GO:0071456;GO:0072719;GO:0090050;GO:1902042;GO:1903589;	K00510	EC:1.14.14.18	P	0DKYK;1B1BX;1D12W;0A1IP;0VAKY;KOG4480;18VDY;0UPPE;139TG	heme oxygenase 1 [Source:RGD Symbol;Acc:2806]	24451	P06762
ENSRNOG00000004500	273.497	73.5564	473.438	6.43639	2.68625	3.4741e-05	0.00943971	7	102586313	102591240	+	2691	Myc	GO:0003700;GO:0005654;GO:0006355;GO:0046983;GO:0003700;GO:0003700;GO:0006355;GO:0006355;	-	-	K	0VABW;18XVH;09ZEU;12RYD;1AWEN;0DKX3;0UKYJ;1CVSB;0IFSM	MYC proto-oncogene, bHLH transcription factor [Source:RGD Symbol;Acc:3130]	-	-
ENSRNOG00000002434	626.589	345.849	907.328	2.62348	1.39148	3.65276e-05	0.00977918	10	77537340	77543192	+	1396	Tmem100	GO:0001525;GO:0001570;GO:0001701;GO:0003197;GO:0003198;GO:0005783;GO:0005886;GO:0005886;GO:0007219;GO:0030509;GO:0043204;GO:0043204;GO:0043491;GO:0045603;GO:0048471;GO:0048471;GO:0050848;GO:0051930;GO:0060842;GO:0071773;GO:2001214;	-	-	S;T	13S2Z;0VICE;1D3N3;0IY9U;193GG;0DUAE;0A7HJ;1B5NJ;0UVGD	transmembrane protein 100 [Source:RGD Symbol;Acc:1560541]	497979	Q569C0
ENSRNOG00000046452	280.41	97.5365	463.283	4.74984	2.24788	3.71915e-05	0.00981262	13	89327794	89433815	-	3699	Fcgr2b	GO:0001540;GO:0001811;GO:0002434;GO:0002638;GO:0002862;GO:0002865;GO:0002924;GO:0004888;GO:0005886;GO:0005886;GO:0005887;GO:0005887;GO:0006898;GO:0006911;GO:0006952;GO:0007166;GO:0007166;GO:0009617;GO:0009897;GO:0009986;GO:0016020;GO:0016021;GO:0016021;GO:0016064;GO:0016358;GO:0019772;GO:0019864;GO:0019864;GO:0019865;GO:0019886;GO:0021549;GO:0030889;GO:0032355;GO:0032456;GO:0032693;GO:0033030;GO:…	K12560	-	W;T	0V8DY;1CTIQ;1AUTP;18YEM;140GW;0DITC;0J9AP;0UMEI;09XFS	Fc fragment of IgG receptor IIb [Source:RGD Symbol;Acc:631331]	289211	Q63203;Q5BKD6
ENSRNOG00000019742	2472.28	1282.17	3662.4	2.8564	1.5142	4.04672e-05	0.0105244	10	88790408	88842233	-	4428	Stat3	GO:0000785;GO:0000976;GO:0000978;GO:0000981;GO:0001103;GO:0001228;GO:0001659;GO:0001754;GO:0003677;GO:0003677;GO:0003700;GO:0003700;GO:0003700;GO:0004879;GO:0005634;GO:0005634;GO:0005634;GO:0005654;GO:0005667;GO:0005667;GO:0005737;GO:0005737;GO:0005829;GO:0005886;GO:0006355;GO:0006355;GO:0006366;GO:0006606;GO:0006954;GO:0007165;GO:0008134;GO:0008283;GO:0008285;GO:0010507;GO:0010628;GO:0010628;GO:…	K04692	-	K	1CT96;09X75;13KVM;KOG3667;0DIIK;0V85R;0UN5S;18W5F;1B3J0	signal transducer and activator of transcription 3 [Source:RGD Symbol;Acc:3772]	25125	P52631
ENSRNOG00000018752	73.6009	12.0128	135.189	11.2537	3.49233	4.14803e-05	0.0106359	1	219468675	219472654	+	2257	Clcf1	GO:0005102;GO:0005125;GO:0005127;GO:0005576;GO:0008284;GO:0042531;GO:0043524;GO:0097058;GO:0097059;	K05421	-	T	13QUJ;0VFD4;0DNAE;0UGU6;1CX7B;0IVWG;0A3N0	cardiotrophin-like cytokine factor 1 [Source:RGD Symbol;Acc:1303171]	365395	Q4KMB8
ENSRNOG00000045654	37.195	0.314321	74.0758	235.669	7.88062	4.48161e-05	0.0113316	20	2699712	2701815	-	2104	LOC108348108	-	K03283	-	O;L	1ATY5;09YID;0USSJ;0V9G5;KOG0101;12PIY;1CUSF;191DD;0DH5C;1ATY5;09YID;0USSJ;0V9G5;KOG0101;12PIY;1CUSF;191DD;0DH5C	heat shock 70 kDa protein 1A [Source:RGD Symbol;Acc:11425585]	108348108	P0DMW1
ENSRNOG00000019184	62.1515	100.335	23.9683	0.238884	-2.06562	5.09487e-05	0.0127058	2	61888950	61949926	-	2043	Npr3	GO:0001501;GO:0001501;GO:0001501;GO:0002158;GO:0002158;GO:0002158;GO:0005887;GO:0007193;GO:0007194;GO:0007200;GO:0008217;GO:0008217;GO:0008217;GO:0008528;GO:0016020;GO:0016020;GO:0016021;GO:0016021;GO:0016021;GO:0016941;GO:0016941;GO:0016941;GO:0016941;GO:0017046;GO:0017046;GO:0017046;GO:0030157;GO:0031404;GO:0031404;GO:0032991;GO:0032991;GO:0033688;GO:0033688;GO:0033688;GO:0035810;GO:0035810;GO:…	K12325	-	T	1CT5K;0UPKM;13JUB;0A0ZH;18ZMW;KOG1023;0DNKV;0VBVX;1B1ZK	natriuretic peptide receptor 3 [Source:RGD Symbol;Acc:3196]	25339	P41740
ENSRNOG00000001915	29.2784	51.4766	7.08013	0.137541	-2.86207	5.32223e-05	0.0130934	11	17538063	17560296	+	2618	Chodl	GO:0005737;GO:0005737;GO:0005737;GO:0005813;GO:0005829;GO:0010975;GO:0016020;GO:0016021;GO:0048471;GO:0048471;GO:0050772;GO:0005737;GO:0005737;GO:0010975;GO:0016020;GO:0016021;GO:0048471;GO:0050772;	K10078	-	T;V	1AX7Q;13M0K;09UCB;0DFMY;KOG4297;1CQBI;0UMRI;19186;0V5BG	chondrolectin [Source:RGD Symbol;Acc:1309885]	288289	D3ZI86
ENSRNOG00000005996	51.2443	83.6818	18.8068	0.224742	-2.15366	6.11619e-05	0.0146826	3	15411939	15433252	-	1179	Lhx6	GO:0000977;GO:0000981;GO:0000981;GO:0000981;GO:0003677;GO:0003677;GO:0003677;GO:0005634;GO:0005634;GO:0005634;GO:0005634;GO:0006355;GO:0006355;GO:0006357;GO:0021799;GO:0021800;GO:0021853;GO:0021877;GO:0021884;GO:0021884;GO:0021895;GO:0030182;GO:0046872;GO:0048469;GO:1990837;GO:1990837;	K09375	-	K	0V94S;1B20S;0UNCI;1CUDG;18W0V;0DJKQ;09Y79;13IEI;KOG0490	LIM homeobox 6 [Source:RGD Symbol;Acc:1306174]	311901	-
ENSRNOG00000048004	145.124	217.665	72.5834	0.333464	-1.5844	6.12951e-05	0.0146826	6	27631364	27643076	-	2662	Garem2	-	-	-	S	1CU2B;0II0U;1B4T7;0VC44;0UM53;0DR6J;0A18E;18YFM;12VKE	GRB2 associated regulator of MAPK1 subtype 2 [Source:RGD Symbol;Acc:1597138]	362801	M0RB26
ENSRNOG00000001224	333.664	152.228	515.099	3.38373	1.75861	6.23176e-05	0.0147337	20	11777783	11815647	-	3151	Itgb2	GO:0001540;GO:0001540;GO:0001851;GO:0002523;GO:0005178;GO:0005886;GO:0005925;GO:0006898;GO:0006909;GO:0006911;GO:0007155;GO:0007155;GO:0007155;GO:0007155;GO:0007159;GO:0007160;GO:0007160;GO:0007160;GO:0007160;GO:0007229;GO:0007229;GO:0007229;GO:0007229;GO:0007229;GO:0007568;GO:0008305;GO:0008305;GO:0009897;GO:0009986;GO:0016020;GO:0016020;GO:0016021;GO:0016477;GO:0019901;GO:0030101;GO:0030369;GO:…	K06464	-	W	0DG9T;1CUIS;0V602;18TZE;09V0A;1AVA6;12SZY;KOG1226;0UJTE	integrin subunit beta 2 [Source:RGD Symbol;Acc:1305581]	309684	B2RYB8
ENSRNOG00000049829	20.5685	1.22751	39.9095	32.5126	5.02293	6.33168e-05	0.014778	4	98337367	98523473	+	1127	AABR07060872.1	GO:0005615;GO:0006955;	-	-	S	1D4BU;0JET2;0DV18;0A9SH;0VKQ1;14622;1D395;196JH;0UWEJ;13VDD;0AB3K;0DTX1;0VM9P;0J107;1B6XQ	-	-	-
ENSRNOG00000000700	215.802	318.996	112.607	0.353004	-1.50225	6.82847e-05	0.0157357	12	48598647	48605704	+	2167	Tmem119	GO:0001503;GO:0001503;GO:0001649;GO:0001649;GO:0001934;GO:0001934;GO:0001958;GO:0001958;GO:0003674;GO:0005575;GO:0005783;GO:0005783;GO:0005886;GO:0005886;GO:0005886;GO:0005886;GO:0007283;GO:0007283;GO:0008150;GO:0010628;GO:0010628;GO:0010832;GO:0010832;GO:0016020;GO:0016021;GO:0030501;GO:0030501;GO:0030501;GO:0030501;GO:0033690;GO:0033690;GO:0033690;GO:0033690;GO:0045669;GO:0045669;GO:0045669;GO:…	-	-	S	0DQFW;0UTQ2;13ITP;1ASXG;1911X;0IVJ5;0A2TP;0VDPC;1CZHZ	transmembrane protein 119 [Source:RGD Symbol;Acc:1307573]	304581	B2RYL3
ENSRNOG00000003134	1296.6	1825.09	768.103	0.420856	-1.2486	7.09376e-05	0.0161427	14	20479323	20920286	-	4620	Slc4a4	GO:0005452;GO:0005452;GO:0005886;GO:0006811;GO:0006814;GO:0006820;GO:0006820;GO:0008509;GO:0008509;GO:0008510;GO:0009986;GO:0015293;GO:0015698;GO:0015701;GO:0016020;GO:0016020;GO:0016020;GO:0016020;GO:0016021;GO:0016021;GO:0016021;GO:0016323;GO:0035725;GO:0036376;GO:0042391;GO:0042802;GO:0045821;GO:0051453;GO:0055085;GO:0098656;GO:0005452;GO:0006820;GO:0008509;GO:0016020;GO:0016021;	K13575	-	P	KOG1172;09VZ2;18U3P;0UHJM;0DHY5;0V6NE;12Q16;1AT6F;1CUNV	solute carrier family 4 member 4 [Source:RGD Symbol;Acc:68936]	84484	Q9JI66
ENSRNOG00000004730	694.139	993.26	395.018	0.397698	-1.33025	7.42264e-05	0.0166826	3	107559997	107760589	-	3113	Meis2	GO:0003677;GO:0006355;GO:0000978;GO:0000978;GO:0000978;GO:0000981;GO:0001228;GO:0001228;GO:0001228;GO:0001228;GO:0001654;GO:0001654;GO:0001654;GO:0003674;GO:0003677;GO:0003677;GO:0003677;GO:0003677;GO:0003677;GO:0005575;GO:0005634;GO:0005634;GO:0005634;GO:0006355;GO:0006355;GO:0006357;GO:0007420;GO:0008134;GO:0008134;GO:0008284;GO:0008542;GO:0008542;GO:0009612;GO:0009880;GO:0009887;GO:0031016;GO:…	K16670	-	K	12QXG;KOG0773;0UJ0K;1CSCS;09WD2;0DHNB;0V7BH	Meis homeobox 2 [Source:RGD Symbol;Acc:1305198]	311311	D4A2T5
ENSRNOG00000009311	53.2762	14.3617	92.1907	6.41919	2.68239	7.6513e-05	0.0169868	7	12804919	12810570	-	1897	Fstl3	GO:0001503;GO:0001822;GO:0001968;GO:0001968;GO:0002244;GO:0002244;GO:0005515;GO:0005576;GO:0005615;GO:0005615;GO:0005615;GO:0005615;GO:0005634;GO:0005634;GO:0005634;GO:0005654;GO:0005794;GO:0006357;GO:0006357;GO:0007275;GO:0007283;GO:0008584;GO:0022409;GO:0022409;GO:0030141;GO:0030154;GO:0030324;GO:0030325;GO:0030510;GO:0030514;GO:0030514;GO:0030514;GO:0032926;GO:0032926;GO:0032926;GO:0044306;GO:…	K23913	-	O;W;K	136BB;1CVYX;KOG3649;09ZKB;18TG0;0VAH4;0UGUG;1B0AW;0DM3V	follistatin like 3 [Source:RGD Symbol;Acc:621811]	114031	Q99PW7
ENSRNOG00000017510	1889.34	2666.15	1112.53	0.41728	-1.26091	8.46385e-05	0.0185644	1	140845465	140860894	-	2196	Mfge8	GO:0007155;GO:0001786;GO:0005178;GO:0005615;GO:0006910;GO:0006911;GO:0007155;GO:0008429;GO:0009897;GO:0019897;GO:0043277;GO:0050766;	K17253	-	W;T	1CUAV;0DH22;0IFBC;0UTE6;18S0X;0V92H;1ARJ3;13JKY;09URB	milk fat globule-EGF factor 8 protein [Source:RGD Symbol;Acc:3083]	25277	P70490
ENSRNOG00000009740	962.12	1491.99	432.249	0.289712	-1.78731	9.12761e-05	0.0197819	4	175729726	175776808	+	2762	Slco1c1	GO:0005515;GO:0005886;GO:0005886;GO:0006811;GO:0008514;GO:0008514;GO:0015349;GO:0015349;GO:0015349;GO:0015711;GO:0015711;GO:0016020;GO:0016020;GO:0016020;GO:0016021;GO:0016323;GO:0016323;GO:0022857;GO:0022857;GO:0055085;GO:0055085;GO:0055085;GO:0070327;GO:2000611;	K08747	-	Q;P	192AR;0DI86;KOG3626;09WXI;0UUA9;13HRA;1B4AU;0V7VT;1CSYI	solute carrier organic anion transporter family, member 1c1 [Source:RGD Symbol;Acc:628660]	84511	Q9EPZ7
ENSRNOG00000038916	79.5284	29.9769	129.08	4.30597	2.10634	9.37332e-05	0.0198814	7	28898649	28932641	-	2742	Dram1	GO:0005737;GO:0005737;GO:0005764;GO:0005764;GO:0005764;GO:0010506;GO:0010506;GO:0010506;GO:0016020;GO:0016021;	K21955	-	S;T	KOG4320;0A1B4;13IZ4;18ZSY;0DNYR;0VC6S;0UG0B;1CXW9;1B37H	DNA-damage regulated autophagy modulator 1 [Source:RGD Symbol;Acc:1598133]	679937	B5DEF4
ENSRNOG00000049075	940.179	480.071	1400.29	2.91684	1.5444	9.39192e-05	0.0198814	2	93981656	93985378	-	723	Fabp5	GO:0001972;GO:0005324;GO:0005504;GO:0005576;GO:0005615;GO:0005615;GO:0005634;GO:0005634;GO:0005737;GO:0005737;GO:0006006;GO:0006629;GO:0006656;GO:0008289;GO:0008289;GO:0008289;GO:0009611;GO:0010829;GO:0014069;GO:0014069;GO:0015909;GO:0030054;GO:0031392;GO:0035360;GO:0042593;GO:0042802;GO:0045202;GO:0045202;GO:0051930;GO:0099178;GO:0099178;GO:0120162;GO:0120162;GO:1990379;	K08754	-	I	1D3CW;0A6X7;KOG4015;0UV0G;13SB3;1B5MC;0VHYA;193BM;0DU16	fatty acid binding protein 5 [Source:RGD Symbol;Acc:70997]	140868	P55053
ENSRNOG00000014961	1027.02	300.606	1753.43	5.83298	2.54423	0.000100091	0.0209443	5	161947137	161981441	-	1852	Pdpn	GO:0016020;GO:0016021;	K16778	-	W;T	1B5SB;13XJM;19435;1D3DH;0A8GE;0UVAP;0J49G;0VJYA;0DTNQ	podoplanin [Source:RGD Symbol;Acc:61819]	54320	Q64294
ENSRNOG00000002946	334.31	40.6058	628.014	15.4661	3.95104	0.000110047	0.022766	10	106975178	106976040	-	863	Socs3	GO:0001784;GO:0001932;GO:0007259;GO:0007259;GO:0009968;GO:0009968;GO:0016567;GO:0035556;GO:0035556;GO:0040008;GO:0042532;GO:0043066;GO:0043066;GO:0045595;GO:0045597;GO:0046426;GO:0046627;GO:0050728;GO:0060670;GO:0060674;GO:0060707;GO:0060708;GO:1990830;	K04696	-	T	0DS95;191EU;0A4T3;KOG4566;13IYN;0VFMZ;1CZRN;1AX90;0UR4C	suppressor of cytokine signaling 3 [Source:RGD Symbol;Acc:621087]	89829	O88583
ENSRNOG00000007600	1364.99	1924.32	805.657	0.41867	-1.25611	0.000133216	0.0272493	X	136792643	136807885	-	4407	Igsf1	GO:0006355;GO:0016020;GO:0032926;GO:0034711;GO:0038102;	-	-	T	1AU4T;1D1DA;18V5S;09XDV;0DRNW;0IIFF;0UIM6;0VFGT;12UDV	immunoglobulin superfamily, member 1 [Source:RGD Symbol;Acc:631402]	302822	Q925N6
ENSRNOG00000022256	23.1517	5.79524	40.5083	6.98992	2.80527	0.000138485	0.0280125	14	17210733	17212930	+	1134	Cxcl10	GO:0002690;GO:0005125;GO:0005125;GO:0005576;GO:0005576;GO:0005576;GO:0005576;GO:0005576;GO:0005615;GO:0005615;GO:0005615;GO:0006935;GO:0006935;GO:0006935;GO:0006935;GO:0006935;GO:0006952;GO:0006952;GO:0006954;GO:0006954;GO:0006955;GO:0006955;GO:0006955;GO:0007186;GO:0007186;GO:0007186;GO:0007189;GO:0007189;GO:0007189;GO:0008009;GO:0008009;GO:0008009;GO:0008009;GO:0008009;GO:0008201;GO:0008201;GO:…	K12671	-	W	13VPQ;1B6SH;1D56C;193TZ;0DVW2;0A9VR;0VKR5;0UWIU;0J1VC	C-X-C motif chemokine ligand 10 [Source:RGD Symbol;Acc:620209]	245920	P48973
ENSRNOG00000022598	350.475	516.325	184.626	0.357576	-1.48368	0.000141747	0.028097	9	15655735	15700312	-	4191	Trerf1	GO:0001650;GO:0003713;GO:0005634;GO:0005654;GO:0005829;GO:0008134;GO:0030374;GO:0033142;GO:0045893;GO:0045944;GO:0050847;GO:0071393;GO:0000118;GO:0003713;GO:0003714;GO:0005634;GO:0005634;GO:0005667;GO:0006357;GO:0008134;GO:0016575;GO:0030374;GO:0033142;GO:0045892;GO:0045893;GO:0045944;GO:0050847;GO:0071393;	-	-	K	1CRKM;13KUZ;0V6KZ;09VMU;0UIUE;KOG4167;0DGWA	transcriptional regulating factor 1 [Source:RGD Symbol;Acc:1307167]	316219	D3ZYN9
ENSRNOG00000025679	879.273	523.327	1235.22	2.36032	1.23898	0.00014199	0.028097	5	144114012	144150647	+	3467	Stk40	GO:0003016;GO:0004672;GO:0005524;GO:0005654;GO:0005829;GO:0005977;GO:0006468;GO:0010468;GO:0030324;GO:0035264;GO:0043066;GO:0043408;GO:0048286;GO:0060425;	K16312	EC:2.7.11.1	T	KOG0583;0VAAZ;09ZDZ;1350N;1CVRI;0DKWC;0USNH;190P5;1ATXD	serine/threonine kinase 40 [Source:RGD Symbol;Acc:727884]	360230	Q7TNL4;A0A0G2JST8
ENSRNOG00000011153	526.904	309.948	743.861	2.39995	1.26301	0.000144983	0.0283808	4	152995865	153018394	+	3845	Il17ra	GO:0005102;GO:0005886;GO:0030368;GO:0032736;GO:0032747;GO:0032754;GO:0032755;GO:0050729;GO:0050832;GO:0071621;GO:0072537;GO:0097400;GO:0097400;GO:1900017;GO:2000340;	K05164	-	T	13JH5;1CQP4;0V5PE;1B1CI;09UPU;0DFZM;0UHIY;18SS1;0IH6C	interleukin 17 receptor A [Source:RGD Symbol;Acc:1306559]	312679	D4A740
ENSRNOG00000014061	129.661	57.4784	201.844	3.51166	1.81215	0.00016944	0.0319832	1	274245184	274258595	+	2419	Dusp5	GO:0000188;GO:0004721;GO:0004722;GO:0004725;GO:0004725;GO:0004725;GO:0004725;GO:0005634;GO:0006470;GO:0006470;GO:0008138;GO:0008138;GO:0008138;GO:0016311;GO:0016311;GO:0016311;GO:0016787;GO:0016791;GO:0016791;GO:0016791;GO:0017017;GO:0017017;GO:0035335;GO:0035970;GO:0106306;GO:0106306;GO:0106307;GO:0106307;	K04459	-	V	0DPDW;13MS0;0VCMA;0UKGT;18UUA;0A1RP;1AXUN;1CYBQ;KOG1716	dual specificity phosphatase 5 [Source:RGD Symbol;Acc:620854]	171109	O54838
ENSRNOG00000050869	448.438	112.513	784.364	6.97133	2.80143	0.000169818	0.0319832	11	89008008	89009146	+	1139	Cebpd	GO:0000976;GO:0000976;GO:0000978;GO:0000978;GO:0000978;GO:0000978;GO:0000981;GO:0001228;GO:0001228;GO:0001228;GO:0002244;GO:0002244;GO:0003677;GO:0003677;GO:0003677;GO:0003700;GO:0003700;GO:0005634;GO:0005634;GO:0005634;GO:0006355;GO:0006355;GO:0006357;GO:0006357;GO:0006357;GO:0042802;GO:0042802;GO:0043565;GO:0045444;GO:0045444;GO:0045595;GO:0045669;GO:0045669;GO:0045892;GO:0045892;GO:0045944;GO:…	K10050	-	K	1DG2D;0WIKP;13FF6;0E96M;0ISXQ;0B5XT;0V3NH	CCAAT/enhancer binding protein delta [Source:RGD Symbol;Acc:2328]	25695	Q03484
ENSRNOG00000029510	1272.21	1770.67	773.749	0.436981	-1.19436	0.000171677	0.0319832	8	117836701	117856689	+	6727	Plxnb1	GO:0002116;GO:0002116;GO:0002116;GO:0005515;GO:0005886;GO:0005887;GO:0005887;GO:0005887;GO:0007162;GO:0007162;GO:0007162;GO:0007165;GO:0007165;GO:0008360;GO:0008360;GO:0008360;GO:0008360;GO:0014068;GO:0014068;GO:0016020;GO:0017154;GO:0017154;GO:0017154;GO:0017154;GO:0017154;GO:0017154;GO:0030334;GO:0032794;GO:0032794;GO:0033689;GO:0033689;GO:0043087;GO:0043547;GO:0043547;GO:0043931;GO:0043931;GO:…	K06821	-	T	1CRZ7;1AZY2;12RMW;18S3F;09UD0;0UJBM;0V5C8;0DFNS;KOG3610	plexin B1 [Source:RGD Symbol;Acc:1310564]	316009	-
ENSRNOG00000047867	303.664	434.247	173.082	0.39858	-1.32706	0.000173106	0.0319832	8	117231769	117237229	-	2560	Klhdc8b	GO:0005515;GO:0005737;GO:0005829;GO:0030496;GO:0045171;GO:0098813;GO:0110070;GO:0140014;GO:1902410;	-	-	S;J	0UGXM;12SUR;KOG1072;0V4JT;09TKT;0DEXD;1ATSI;18XIP;1CPM1	kelch domain containing 8B [Source:RGD Symbol;Acc:1359445]	306589	Q5XIA9
ENSRNOG00000024905	283.295	409.373	157.216	0.38404	-1.38067	0.000173166	0.0319832	6	27425235	27460038	-	2457	Drc1	GO:0005829;GO:0005858;GO:0007368;GO:0007507;GO:0060285;GO:0070286;GO:0070286;	K19754	-	Z;S	09XUZ;0IEKG;1CW0D;0DM59;18TQ5;12R8S;0V8SM;1AZZ7;0UQ8T	dynein regulatory complex subunit 1 [Source:RGD Symbol;Acc:1359318]	362712	Q5XI65
ENSRNOG00000007338	867.072	346.652	1387.49	4.00255	2.00092	0.0001753	0.0319832	4	122835436	122895121	+	4309	Fbln2	GO:0005509;GO:0005509;GO:0005515;GO:0005576;GO:0005576;GO:0005576;GO:0010811;GO:0010811;GO:0010811;GO:0030198;GO:0030198;GO:0050840;GO:0050840;GO:0050840;GO:0062023;GO:0062023;	K17307	-	W;T	1BB58;197A8;13DX5;0B4ZX;0WHJJ;0E8MC;0IR7F;0V3BX;1DFJ4	fibulin 2 [Source:RGD Symbol;Acc:628685]	282583	G3V6X1
ENSRNOG00000039754	187.055	101.945	272.164	2.66971	1.41668	0.000175684	0.0319832	13	48455923	48482138	+	2583	Rab7b	GO:0003924;GO:0003924;GO:0005525;GO:0005525;GO:0005764;GO:0005764;GO:0005764;GO:0005764;GO:0005770;GO:0005770;GO:0005770;GO:0005770;GO:0005794;GO:0005794;GO:0005802;GO:0005802;GO:0008333;GO:0032755;GO:0032755;GO:0034144;GO:0034144;GO:0034164;GO:0034164;GO:0034499;GO:0034499;GO:0045335;GO:0045335;GO:0045335;GO:0045335;GO:0045654;GO:0045654;GO:0051092;GO:0051092;GO:0071346;GO:0071346;GO:0090385;	K07898	-	U	1CWAW;1B46X;0UTM1;09ZWZ;13NHB;0VATI;1900B;KOG0394;0DMFK	Rab7b, member RAS oncogene family [Source:RGD Symbol;Acc:1562617]	501854	D4A7A8
ENSRNOG00000014739	64.9688	101.048	28.8892	0.285895	-1.80644	0.000178341	0.0321455	3	161018511	161024209	+	731	Wfdc2	GO:0005576;GO:0030414;GO:0005576;GO:0030414;	K23636	-	W	0A938;1B6D1;0VJUS;0J36N;13XT5;1D4Q5;1941D;0DVDJ;0UW64	WAP four-disulfide core domain 2 [Source:RGD Symbol;Acc:628757]	286888	Q8CHN3
ENSRNOG00000047493	635.376	885.813	384.94	0.434561	-1.20237	0.000183725	0.0327913	4	175969549	176026163	-	3752	Slco1a4	GO:0005515;GO:0006820;GO:0008514;GO:0016020;GO:0016020;GO:0022857;GO:0055085;GO:0005515;GO:0016020;GO:0022857;GO:0055085;	K03460	-	Q	KOG3626	solute carrier organic anion transporter family, member 1a4 [Source:RGD Symbol;Acc:621389]	170698	O35913
ENSRNOG00000001036	289.058	417.893	160.224	0.383409	-1.38305	0.000187651	0.0331668	12	12665194	12712742	-	3914	Rsph10b	-	-	-	S;E	1AVHY;18XB3;1CZ93;0DQ7S;0A1QR;12TZ4;0VCK9;KOG0231;0UINH	radial spoke head 10 homolog B [Source:RGD Symbol;Acc:1311893]	288478	Q66HB5
ENSRNOG00000023013	176.767	96.154	257.381	2.67676	1.42049	0.000190059	0.0332695	18	51844976	52017734	-	1934	Marchf3	GO:0008270;GO:0005764;GO:0005768;GO:0008270;GO:0043231;	K10658	EC:2.3.2.27	A;O	0A486;1CZ1N;0VD9D;KOG1609;19589;13VEV;0UFPJ;1B55H;0DQ11	membrane associated ring-CH-type finger 3 [Source:RGD Symbol;Acc:1359308]	364878	Q5XIE5
ENSRNOG00000048847	303.951	460.651	147.251	0.319658	-1.6454	0.000192207	0.0333251	16	39827749	39938513	+	3898	Wdr17	GO:0005515;	K24740	-	B	1ASFF;0UGR8;1CQ51;09U5S;0DFF9;KOG0273;0V54R;18TBC;12SDZ	WD repeat domain 17 [Source:RGD Symbol;Acc:1590843]	364653	-
ENSRNOG00000026941	1282.48	1821.14	743.825	0.40844	-1.2918	0.000199381	0.0342427	4	83967696	83972540	-	4845	Tril	GO:0001530;GO:0002718;GO:0005515;GO:0034142;GO:0046696;	-	-	T;W;V	0VDRY;KOG0619;0A2WR;0UQVX;0DI64;137ZK;1AZD0;1CSWG;18ZH3	TLR4 interactor with leucine-rich repeats [Source:RGD Symbol;Acc:1310827]	362364	Q496Z2
ENSRNOG00000003895	69.5877	9.99279	129.183	12.9276	3.69238	0.000207394	0.0350786	13	61066153	61070599	-	1366	Rgs1	GO:0001965;GO:0005096;GO:0005096;GO:0005829;GO:0007165;GO:0007186;GO:0008277;GO:0009617;GO:0031234;GO:0043547;GO:0061737;	K16449	-	T	KOG3589	regulator of G-protein signaling 1 [Source:RGD Symbol;Acc:3561]	54289	P97844
ENSRNOG00000012181	879.073	1227.28	530.861	0.432549	-1.20906	0.000209803	0.0350786	16	22537056	22561496	-	3671	Lpl	GO:0004465;GO:0004465;GO:0004806;GO:0004806;GO:0005102;GO:0005509;GO:0005515;GO:0005615;GO:0006629;GO:0006631;GO:0006633;GO:0008201;GO:0008970;GO:0010886;GO:0010890;GO:0019433;GO:0032722;GO:0034185;GO:0034371;GO:0034372;GO:0042632;GO:0042803;GO:0043395;GO:0045600;GO:0052689;GO:0055096;GO:0070328;GO:0071813;	-	-	I;G	0V43M;18SPR;0IJUA;09YV0;0URVT;12SVP;1AUDV;1CTTB;0DK9W	lipoprotein lipase [Source:RGD Symbol;Acc:3017]	-	-
ENSRNOG00000010597	104.76	181.072	28.4474	0.157106	-2.67019	0.000212905	0.0350786	9	5294381	5330815	-	4999	Slc5a7	GO:0001701;GO:0005307;GO:0005886;GO:0005886;GO:0007271;GO:0007274;GO:0008292;GO:0008292;GO:0015220;GO:0015220;GO:0015871;GO:0016020;GO:0016020;GO:0016020;GO:0016021;GO:0016021;GO:0022857;GO:0022857;GO:0031594;GO:0033265;GO:0043025;GO:0055085;GO:0055085;GO:0016020;GO:0016020;GO:0016020;GO:0016021;GO:0022857;GO:0022857;GO:0055085;GO:0055085;	K14387	-	P	1AZ7N;1CUXJ;0DK3T;12QNJ;KOG3761;0UJ7I;09XPD;0V8KZ;191NK	solute carrier family 5 member 7 [Source:RGD Symbol;Acc:69270]	85426	Q9JMD7
ENSRNOG00000016756	32.3384	9.64131	55.0355	5.7083	2.51306	0.000214628	0.0350786	1	78833157	78837623	+	3443	Ptgir	GO:0004930;GO:0005829;GO:0005886;GO:0007186;GO:0007189;GO:0007189;GO:0010642;GO:0016021;GO:0032496;GO:0048662;GO:0048662;	K04263	-	T	KOG3656;0V9VD;18V5R;13HYN;1B15B;0UU8X;1CV6N;09YXQ;0DKCR	prostaglandin I2 receptor [Source:RGD Symbol;Acc:1310890]	292661	P43253
ENSRNOG00000036942	31.1863	9.8981	52.4746	5.30148	2.40639	0.00021475	0.0350786	5	168009393	168035810	+	1711	Tnfrsf9	GO:0005515;GO:0005615;GO:0006915;GO:0006915;GO:0008285;GO:0008285;GO:0009897;GO:0009897;GO:0009897;GO:0009897;GO:0016020;GO:0016021;GO:0019955;GO:0019955;GO:0032693;GO:0032695;GO:0038023;GO:0038023;GO:0038023;GO:0038023;GO:0042127;GO:0042127;GO:0042802;GO:0005515;GO:0005615;GO:0006915;GO:0006915;GO:0008285;GO:0008285;GO:0009897;GO:0009897;GO:0009897;GO:0009897;GO:0016020;GO:0016021;GO:0019955;GO:…	K05146	-	T	1D12G;1AZW0;1966K;0VF4P;13P0A;0IW3N;0DQGQ;0USZ5;0A4A0	TNF receptor superfamily member 9 [Source:RGD Symbol;Acc:1598208]	500590	Q4V895
ENSRNOG00000013747	133.61	70.2557	196.963	2.80352	1.48724	0.00021868	0.0350786	14	81435449	81472952	-	2859	Sh3bp2	GO:0001784;GO:0007165;	K07984	-	T	19132;0IGI1;12U6S;0A1YH;0UFFD;1CX22;0DN5J;1ARC7;0VCE6	SH3-domain binding protein 2 [Source:RGD Symbol;Acc:1310588]	305450	F1LS93
ENSRNOG00000042446	90.2179	160.242	20.1935	0.126018	-2.9883	0.000219238	0.0350786	3	110491226	110492398	-	1173	Ankrd63	GO:0005515;	-	-	S;E	KOG0504;0UR22;1D1PZ;0DS73;18TTC;0VFUN;1AZY1;0A4ZF;13TQP	ankyrin repeat domain 63 [Source:RGD Symbol;Acc:1595953]	691770	D3ZKY6
ENSRNOG00000009967	450.26	796.637	103.883	0.130402	-2.93896	0.000219663	0.0350786	6	27328406	27424864	+	7163	Otof	GO:0005509;GO:0016021;GO:0016079;GO:0005509;GO:0016021;GO:0016079;	K19949	-	M;U	09TCK;12QQ5;18VMX;KOG1326;0DI4C;1CSUS;0V4BR;0UINT;1AUK9	otoferlin [Source:RGD Symbol;Acc:620646]	84573	A0A0G2K867
ENSRNOG00000020416	453.725	638.433	269.018	0.421372	-1.24683	0.000222684	0.0352351	7	11335478	11353713	-	2675	Zfr2	GO:0003676;GO:0003676;GO:0003725;GO:0003727;GO:0005634;GO:0008270;GO:0008270;	K13203	-	S;A;C	12TUD;1CVUP;1AZS3;09VKJ;0V6JR;KOG3792;18Y9U;0DKZW;0UGMF	zinc finger RNA binding protein 2 [Source:RGD Symbol;Acc:1304737]	314639	-
ENSRNOG00000019638	1178.97	722.994	1634.94	2.26134	1.17718	0.000224513	0.0352351	2	187842885	187863516	-	3213	Lmna	GO:0005634;GO:0005634;GO:0005635;GO:0005635;GO:0005638;GO:0005654;GO:0005829;GO:0005882;GO:0006606;GO:0006997;GO:0006998;GO:0008285;GO:0010628;GO:0016363;GO:0016604;GO:0016607;GO:0030334;GO:0030951;GO:0031647;GO:0031965;GO:0034504;GO:0035861;GO:0055015;GO:0071456;GO:0072201;GO:0090201;GO:0090343;GO:1900114;GO:1900180;GO:1903243;GO:1990683;GO:2001237;GO:0005882;GO:0005882;GO:0005882;GO:0005882;	K12641	-	Z;D;B;Y	1CRS3;0V6SA;0UHSX;12PTX;09VTI;18S9T;0DH1W;KOG0977;1ARIZ	lamin A/C [Source:RGD Symbol;Acc:620456]	60374	G3V8L3
ENSRNOG00000017801	3330.7	2063.31	4598.09	2.2285	1.15607	0.000226894	0.0353044	7	121480723	121482772	+	1940	Atf4	GO:0000122;GO:0000122;GO:0000122;GO:0000976;GO:0000977;GO:0000978;GO:0000978;GO:0000978;GO:0000981;GO:0000981;GO:0001085;GO:0001228;GO:0001228;GO:0001228;GO:0003677;GO:0003677;GO:0003677;GO:0003700;GO:0003700;GO:0003700;GO:0003700;GO:0003700;GO:0005634;GO:0005634;GO:0005634;GO:0005634;GO:0005634;GO:0005634;GO:0005654;GO:0005667;GO:0005667;GO:0005737;GO:0005737;GO:0005737;GO:0005737;GO:0005737;GO:…	K04374	-	K	1D0BZ;1ARUV;0UU7X;12N2V;0DR6K;KOG4571;18U4Y;0VEF5;0A3JX	activating transcription factor 4 [Source:RGD Symbol;Acc:621863]	79255	Q9ES19;B0BMW3
ENSRNOG00000019390	33.6117	11.1889	56.0346	5.00807	2.32426	0.000230155	0.0355083	8	130416355	130421871	+	2266	Klhl40	GO:0005515;GO:0031397;GO:0048741;	K10473	-	T	KOG4441	kelch-like family member 40 [Source:RGD Symbol;Acc:1305368]	316088	-
ENSRNOG00000004972	314.429	133.726	495.133	3.70259	1.88853	0.00023376	0.0357212	14	89314176	89334276	+	2038	Upp1	GO:0003824;GO:0003824;GO:0004850;GO:0004850;GO:0004850;GO:0004850;GO:0004850;GO:0004850;GO:0004850;GO:0005654;GO:0005737;GO:0005737;GO:0005829;GO:0005829;GO:0006218;GO:0006218;GO:0006218;GO:0006220;GO:0006220;GO:0006248;GO:0006248;GO:0006249;GO:0006249;GO:0009032;GO:0009032;GO:0009116;GO:0009116;GO:0009166;GO:0009166;GO:0016740;GO:0016757;GO:0016763;GO:0016763;GO:0042149;GO:0042802;GO:0042802;GO:…	K00757	EC:2.4.2.3	F	09UGA;18V8D;0UI8B;KOG3728;12PTT;0DFS2;1CQFK;0V5FN;1ATT2	uridine phosphorylase 1 [Source:RGD Symbol;Acc:1305566]	289801	Q499V1
ENSRNOG00000014258	112.893	47.2436	178.542	3.77917	1.91807	0.00023546	0.0357212	1	4637491	4653210	-	3231	Rab32	GO:0000166;GO:0003924;GO:0003924;GO:0003924;GO:0003924;GO:0003924;GO:0005525;GO:0005525;GO:0005525;GO:0005739;GO:0005739;GO:0005741;GO:0005769;GO:0005783;GO:0005794;GO:0005794;GO:0005802;GO:0005802;GO:0005802;GO:0005802;GO:0006886;GO:0007005;GO:0012505;GO:0016020;GO:0016020;GO:0016192;GO:0016192;GO:0019882;GO:0030742;GO:0031982;GO:0031982;GO:0032438;GO:0033162;GO:0035646;GO:0035650;GO:0035651;GO:…	K07918	-	U	0UK7T;1CX4D;0DMV7;12SMZ;0VB4K;KOG4423;1915B;0A08N;1ATT3	RAB32, member RAS oncogene family [Source:RGD Symbol;Acc:1559997]	365042	D4AEG2
ENSRNOG00000000456	112.769	44.5431	180.995	4.06338	2.02268	0.000237747	0.0357701	20	3990613	3993769	+	2066	Psmb8	GO:0000502;GO:0000502;GO:0000502;GO:0000502;GO:0004298;GO:0004298;GO:0005634;GO:0005737;GO:0005839;GO:0005839;GO:0005839;GO:0006508;GO:0008233;GO:0016787;GO:0019882;GO:0045444;GO:0045444;GO:0051603;GO:0051603;GO:0052548;GO:1990111;	K02740	EC:3.4.25.1	O	0V6J5;KOG0175;12PAC;0UH93;0DGUM;18SWK;1AS2J;09VK0;1CRIR	proteasome 20S subunit beta 8 [Source:RGD Symbol;Acc:3426]	24968	P28064;A0A023IMI6
ENSRNOG00000018166	860.113	523.411	1196.81	2.28657	1.19318	0.000245063	0.0365152	2	199831990	199847629	+	4979	Prkab2	GO:0006629;GO:0006631;GO:0006633;GO:0050790;GO:0050790;GO:0120162;GO:0004679;GO:0005515;GO:0006468;GO:0006629;GO:0006631;GO:0006633;GO:0016301;GO:0016310;GO:0031588;GO:0042802;GO:0050790;GO:0050790;GO:0120162;GO:0120162;	K07199	-	C;G	09WBC;1CSB3;194MK;KOG1616;12P0Q;0V79M;1B4VQ;0DHKM;0UJTQ	protein kinase AMP-activated non-catalytic subunit beta 2 [Source:RGD Symbol;Acc:620905]	64562	Q9QZH4
ENSRNOG00000047137	2843.22	1595.05	4091.39	2.56505	1.35899	0.000247116	0.0365152	2	33881024	33920837	-	5718	Erbin	GO:0005176;GO:0005515;GO:0007165;GO:0032088;	K12796	-	S;T	0KCZ0;0WCG7;0E5H1;14T4V;1DCH1;1B9X2;0AZZW;196RM;0V0ZJ	erbb2 interacting protein [Source:RGD Symbol;Acc:1562952]	365661	M0R9T2
ENSRNOG00000011774	55.6368	21.6095	89.6642	4.1493	2.05287	0.000248716	0.0365152	5	160122425	160158386	-	3009	Fblim1	GO:0001650;GO:0001725;GO:0001725;GO:0001725;GO:0003674;GO:0005575;GO:0005737;GO:0005737;GO:0005925;GO:0005925;GO:0008150;GO:0030054;GO:0031005;GO:0031005;GO:0031005;GO:0033623;GO:0033623;GO:0046872;GO:0071944;GO:0071944;GO:0098609;GO:0098609;GO:0098609;GO:0001725;GO:0001725;GO:0003674;GO:0005575;GO:0005737;GO:0005925;GO:0008150;GO:0031005;GO:0031005;GO:0033623;GO:0046872;GO:0071944;GO:0098609;GO:…	K24416	-	T	0VCJZ;18X65;1CYA8;KOG1701;0UPS3;1B3DZ;13JRW;0DPCC;0A1QC	filamin binding LIM protein 1 [Source:RGD Symbol;Acc:1359551]	362650	Q5U1Y3
ENSRNOG00000028908	79.5392	128.857	30.2213	0.234534	-2.09213	0.000252385	0.0367574	3	161041727	161050557	-	2772	Eppin	GO:0001669;GO:0004867;GO:0005576;GO:0005737;GO:0030414;	K23622	-	O;W	13TKX;KOG4295;0VJ1R;0DU64;1D3FD;0A7YJ;0UV9P;1B661;193QA	epididymal peptidase inhibitor [Source:RGD Symbol;Acc:1597722]	685161	D4A2Z2
ENSRNOG00000007374	246.518	371.9	121.137	0.325725	-1.61827	0.000256737	0.0370679	4	33638709	33646819	+	1178	Tac1	GO:0005576;GO:0006954;GO:0007204;GO:0007217;GO:0019233;GO:0030424;GO:0043025;GO:0048265;GO:1990090;GO:0007217;GO:0007217;	K05239	-	W	0UUXW;192MT;13QPC;1D399;0IWZZ;1B5HU;0A6Z0;0VHT5;0DTX5	tachykinin, precursor 1 [Source:RGD Symbol;Acc:3807]	24806	P06767
ENSRNOG00000005037	24.1719	4.32976	44.0141	10.1655	3.34561	0.000258589	0.0370679	3	100366168	100427030	+	3500	Kif18a	GO:0000070;GO:0000166;GO:0000776;GO:0001726;GO:0001726;GO:0003674;GO:0003774;GO:0003777;GO:0003777;GO:0003777;GO:0003779;GO:0003779;GO:0005524;GO:0005524;GO:0005524;GO:0005575;GO:0005634;GO:0005634;GO:0005634;GO:0005737;GO:0005737;GO:0005828;GO:0005828;GO:0005871;GO:0005874;GO:0005874;GO:0005901;GO:0005901;GO:0007018;GO:0007018;GO:0007018;GO:0007019;GO:0007019;GO:0007019;GO:0007080;GO:0007080;GO:…	K10401	-	Z	12RJM;1CPG1;0UFSZ;1ARMY;09TF8;0DESB;KOG0242;18US5;0V4EB	kinesin family member 18A [Source:RGD Symbol;Acc:1561740]	362186	D3ZIA5
ENSRNOG00000029756	53.7219	85.4228	22.0211	0.25779	-1.95573	0.000261029	0.0371253	2	149430854	149432106	-	1253	P2ry13	GO:0004930;GO:0005783;GO:0007186;GO:0007194;GO:0016021;GO:0045028;GO:0071407;	K08388	-	T	1CT99;09X78;1AWBY;0IFYD;18TZF;0DIIP;0V85U;12QCX;0UKVV	purinergic receptor P2Y13 [Source:RGD Symbol;Acc:1302941]	310444	Q6GUG4
ENSRNOG00000022839	144.181	78.0214	210.341	2.69594	1.43079	0.000263962	0.0372513	1	252906234	252911382	+	2045	Ifit3	GO:0003723;GO:0005515;GO:0005737;GO:0005737;GO:0005739;GO:0005829;GO:0005829;GO:0008285;GO:0008285;GO:0009615;GO:0009615;GO:0009617;GO:0035457;GO:0035457;GO:0035458;GO:0035634;GO:0042802;GO:0042802;GO:0043066;GO:0043066;GO:0051607;	K24849	-	T;P	1AVY2;0UPM4;18T62;1CVFR;12U68;0DKMA;KOG1124;09Z5A;0VA2H	interferon-induced protein with tetratricopeptide repeats 3 [Source:RGD Symbol;Acc:1359681]	309526	Q6AYE7
ENSRNOG00000024382	78.9408	31.4238	126.458	4.02426	2.00872	0.000266076	0.0372609	13	89385859	89396051	+	1342	Fcgr3a	GO:0003674;GO:0004888;GO:0005887;GO:0007166;GO:0009897;GO:0009986;GO:0009986;GO:0016020;GO:0016021;GO:0019767;GO:0019767;GO:0019770;GO:0019770;GO:0038094;GO:0038095;GO:0042060;GO:0042119;GO:0042119;GO:0045780;GO:0045780;GO:0050776;GO:0051930;GO:0071222;	K06463	-	T	1CT5P;0DIF5;0UH33;0V4JJ;18UCB;13I65;0IKYD;09X44;1AV4J	Fc fragment of IgG receptor IIIa [Source:RGD Symbol;Acc:1303067]	304966	Q6XPU4
ENSRNOG00000050996	489.431	712.594	266.268	0.373661	-1.4202	0.000273665	0.0380311	15	58016238	58019442	+	3205	Kctd4	GO:0005515;GO:0051260;GO:0051260;	-	-	S;G	0V9WV;1CV87;09YZ8;0DKE6;KOG2723;12SWP	potassium channel tetramerization domain containing 4 [Source:RGD Symbol;Acc:1594637]	691835	D3ZXL9
ENSRNOG00000016416	971.88	539.384	1404.38	2.60367	1.38054	0.00028034	0.0386636	1	214151338	214163808	-	1873	Rnh1	GO:0005515;GO:0005737;GO:0005515;GO:0005737;GO:0005515;GO:0005654;GO:0005737;GO:0005829;GO:0008428;GO:0032311;GO:0043086;GO:0045765;	K16634	-	S;T;I	1CTJT;0UMG5;12QJ4;0DIUG;1AZPP;KOG4308;0V8F0;09XGZ;18VH9	ribonuclease/angiogenin inhibitor 1 [Source:RGD Symbol;Acc:621398]	100360501	P29315;E2RUH2
ENSRNOG00000003244	31.0057	51.3894	10.6219	0.206695	-2.27443	0.000286576	0.0392264	10	35737664	35739625	-	506	Ltc4s	GO:0006691;GO:0008047;GO:0016021;	K00807	EC:4.4.1.20	M;I	13S22;0A7S9;0IX5F;0UVBZ;0VIKT;0DUFA;1D3ER;1B5SS;193FD	leukotriene C4 synthase [Source:RGD Symbol;Acc:620677]	114097	Q925U2
ENSRNOG00000013668	179.277	57.0185	301.536	5.28839	2.40283	0.000290863	0.0395162	4	100407658	100419446	+	1476	Capg	GO:0001726;GO:0003779;GO:0005546;GO:0005615;GO:0005634;GO:0005634;GO:0005634;GO:0005654;GO:0005730;GO:0005730;GO:0005737;GO:0005737;GO:0005737;GO:0005737;GO:0005814;GO:0005814;GO:0007417;GO:0008154;GO:0015629;GO:0019904;GO:0019904;GO:0030027;GO:0030031;GO:0030031;GO:0042470;GO:0042995;GO:0044877;GO:0044877;GO:0045335;GO:0051014;GO:0051015;GO:0051015;GO:0051015;GO:0051016;GO:0051016;GO:0051016;GO:…	K10368	-	Z	13HHD;190Y7;KOG0443;1D0BW;0UU7U;0DR6G;0VEF2;1B2TK;0A3JT	capping actin protein, gelsolin like [Source:RGD Symbol;Acc:1311724]	297339	Q6AYC4
ENSRNOG00000010158	98.5669	147.757	49.3767	0.334175	-1.58132	0.00029512	0.0397975	1	123015746	123019522	+	3777	Magel2	GO:0004842;GO:0005634;GO:0005737;GO:0005768;GO:0030904;GO:0034314;GO:0042147;GO:0042752;GO:0045892;GO:0051127;GO:0070534;	K23950	-	S;K	1B46G;0DSVQ;141PH;1D2B5;KOG4562;18ZZH;0A5M9;0UQX9;0VDYT	MAGE family member L2 [Source:RGD Symbol;Acc:1583615]	679875	D3ZTL5
ENSRNOG00000013634	191.981	105.345	278.617	2.64481	1.40316	0.000305942	0.0409535	8	128022473	128026841	-	2457	Myd88	GO:0002238;GO:0002269;GO:0002283;GO:0002755;GO:0002755;GO:0005149;GO:0005515;GO:0005634;GO:0005737;GO:0005829;GO:0005886;GO:0006909;GO:0006909;GO:0006915;GO:0006954;GO:0007165;GO:0007166;GO:0009615;GO:0009682;GO:0010468;GO:0010628;GO:0016064;GO:0031663;GO:0032481;GO:0032494;GO:0032496;GO:0032675;GO:0032680;GO:0032722;GO:0032740;GO:0032747;GO:0032755;GO:0032757;GO:0032760;GO:0035325;GO:0042127;GO:…	K04729	-	T;K	12SM9;0A237;1CWEU;0UQSF;191S8;0VCYQ;0IIN8;0DFRX;1B0YG	MYD88, innate immune signal transduction adaptor [Source:RGD Symbol;Acc:735043]	301059	Q6Y1S1
ENSRNOG00000020848	761.125	470.785	1051.47	2.23343	1.15926	0.000309617	0.0410083	1	84044551	84067066	+	2096	Coq8b	GO:0000166;GO:0005524;GO:0005737;GO:0005739;GO:0005739;GO:0005739;GO:0005829;GO:0005886;GO:0006468;GO:0006744;GO:0006744;GO:0006744;GO:0006744;GO:0006744;GO:0016020;GO:0016021;GO:0016301;GO:0016301;GO:0016310;GO:0016740;GO:0021692;GO:0021692;GO:0031314;GO:0031966;	K08869	-	S;G	0VBIQ;1AWIN;18UYS;1CUH0;12NR4;0A0NM;0UTHY;0DN9Z;KOG1234	coenzyme Q8B [Source:RGD Symbol;Acc:1311356]	308453	Q6AY19
ENSRNOG00000050647	1267.84	11.9365	2523.75	211.432	7.72405	0.000312251	0.0410083	20	4877324	4879779	-	2456	Hspa1b	-	K03283	-	-	-	heat shock protein family A (Hsp70) member 1B [Source:RGD Symbol;Acc:2840]	24472	P0DMW0;P0DMW1
ENSRNOG00000033261	5125.68	7050.75	3200.61	0.453938	-1.13943	0.000314615	0.0410083	15	18399515	18415965	+	3085	Fam107a	GO:0001558;GO:0001725;GO:0005634;GO:0005737;GO:0005925;GO:0015629;GO:0016607;GO:0030335;GO:0031398;GO:0031647;GO:0032587;GO:0032956;GO:0051895;GO:0070507;GO:2000134;	-	-	-	-	family with sequence similarity 107, member A [Source:RGD Symbol;Acc:1306327]	361018	Q566E1
ENSRNOG00000009972	286.869	168.044	405.693	2.4142	1.27155	0.000315362	0.0410083	10	86860685	86884210	+	3456	Rara	GO:0000122;GO:0000122;GO:0000122;GO:0000785;GO:0000785;GO:0000900;GO:0000976;GO:0000976;GO:0000977;GO:0000977;GO:0000977;GO:0000978;GO:0000978;GO:0000978;GO:0001657;GO:0001657;GO:0001843;GO:0001843;GO:0001889;GO:0001972;GO:0001972;GO:0002068;GO:0002068;GO:0003148;GO:0003148;GO:0003417;GO:0003417;GO:0003677;GO:0003677;GO:0003677;GO:0003677;GO:0003677;GO:0003682;GO:0003682;GO:0003700;GO:0003700;GO:…	K08527	-	K	0A2S1;0VCMW;1CUZC;13J5G;1AT6T;0DK5J;KOG3575;0UIJW	retinoic acid receptor, alpha [Source:RGD Symbol;Acc:3534]	24705	Q499N1
ENSRNOG00000021670	78.9928	120.002	37.9831	0.316519	-1.65963	0.00032913	0.0424952	2	142747501	142885604	-	9810	Frem2	GO:0001654;GO:0001654;GO:0001654;GO:0001822;GO:0001822;GO:0002009;GO:0002009;GO:0005604;GO:0005604;GO:0007154;GO:0007154;GO:0007155;GO:0007155;GO:0007507;GO:0007507;GO:0016020;GO:0016021;GO:0016021;GO:0016021;GO:0042733;GO:0042733;GO:0048839;GO:0048839;	K23380	-	O;W;T;P	KOG1306;0V3A5;KOG2090;1BB3X;1979G;0E8I9;1DFGD;KOG3597;0B4VC;0WHE8;13DQN	FRAS1 related extracellular matrix 2 [Source:RGD Symbol;Acc:1566012]	310418	F1T1U1
ENSRNOG00000037957	673.832	989.119	358.546	0.36249	-1.46399	0.000334814	0.0429245	11	87366621	87380704	+	2337	Aifm3	GO:0005739;GO:0005743;GO:0005783;GO:0005829;GO:0016491;GO:0050660;GO:0051537;GO:0055114;GO:0097194;GO:0005743;GO:0005783;GO:0016491;GO:0016491;GO:0055114;GO:0097194;	K22747	-	Q;C;P	18Y27;KOG1336;09UFR;0DFRE;1AYZ0;12NZZ;1CQF0;0UTGA;0V5F4	apoptosis inducing factor, mitochondria associated 3 [Source:RGD Symbol;Acc:1306028]	303786	D3ZF03
ENSRNOG00000014870	144.545	211.605	77.4855	0.36618	-1.44937	0.000339651	0.0432402	10	58810058	58834538	-	3475	Slc13a5	GO:0005654;GO:0005829;GO:0005886;GO:0006811;GO:0006814;GO:0006842;GO:0015137;GO:0015137;GO:0015141;GO:0015142;GO:0015744;GO:0015746;GO:0015746;GO:0016020;GO:0016020;GO:0016020;GO:0016021;GO:0022857;GO:0022857;GO:0035674;GO:0055085;GO:0055085;GO:0071422;	K14445	-	P	0V512;1B2G3;18TMY;12Q3H;0UGKU;1CQ1N;0DFBW;09U24;KOG1281	solute carrier family 13 member 5 [Source:RGD Symbol;Acc:631374]	266998	Q8CJ44
ENSRNOG00000008644	18.7094	32.934	4.48489	0.136178	-2.87643	0.000347718	0.0435645	6	77418096	77421286	-	2297	Nkx2-1	GO:0000122;GO:0000122;GO:0000976;GO:0000976;GO:0000977;GO:0000977;GO:0000978;GO:0000981;GO:0000981;GO:0000981;GO:0001161;GO:0001161;GO:0001764;GO:0003677;GO:0003677;GO:0003677;GO:0003677;GO:0003700;GO:0003700;GO:0005634;GO:0005634;GO:0005634;GO:0005667;GO:0006355;GO:0006355;GO:0006355;GO:0006357;GO:0006644;GO:0007389;GO:0007411;GO:0007420;GO:0007420;GO:0007492;GO:0007626;GO:0008134;GO:0009725;GO:…	K09342	-	K	13KS2;0DPDA;1ART5;KOG0842;18UZK;1CYB6;0VCKT;0UFZ7;0A1R4	NK2 homeobox 1 [Source:RGD Symbol;Acc:3866]	25628	G3V740
ENSRNOG00000007002	192.538	3.38679	381.69	112.7	6.81634	0.000348346	0.0435645	14	84482674	84500642	+	2226	Lif	GO:0001974;GO:0005102;GO:0005125;GO:0005125;GO:0005125;GO:0005125;GO:0005125;GO:0005146;GO:0005146;GO:0005146;GO:0005576;GO:0005576;GO:0005576;GO:0005615;GO:0005829;GO:0006955;GO:0006955;GO:0007260;GO:0007566;GO:0008083;GO:0008083;GO:0008083;GO:0008284;GO:0008284;GO:0008285;GO:0010628;GO:0019827;GO:0030324;GO:0033138;GO:0033141;GO:0033630;GO:0042531;GO:0043410;GO:0045595;GO:0045651;GO:0045835;GO:…	K05419	-	W;K	1AW5H;13KJX;0UKPG;09WYC;0V7WJ;1CSZC;0DI8W;0ITBQ;18X3D	LIF, interleukin 6 family cytokine [Source:RGD Symbol;Acc:620865]	60584	O88211
ENSRNOG00000003544	12.3171	1.51206	23.1221	15.2918	3.93469	0.000350217	0.0435645	10	73333119	73362783	+	3254	Tbx4	GO:0000978;GO:0000981;GO:0001525;GO:0001525;GO:0001525;GO:0001708;GO:0002009;GO:0002009;GO:0003674;GO:0003677;GO:0003700;GO:0003700;GO:0005575;GO:0005634;GO:0005634;GO:0005634;GO:0006355;GO:0006355;GO:0006357;GO:0008150;GO:0030324;GO:0030324;GO:0030326;GO:0030326;GO:0030326;GO:0035108;GO:0035108;GO:0035108;GO:0035116;GO:0035116;GO:0048705;GO:0048705;GO:1990401;GO:1990401;	K10178	-	K	0UKP1;12SBZ;1CTPC;0V6G9;1AW54;KOG3585;0DIXX;09XK8;18WSR	T-box transcription factor 4 [Source:RGD Symbol;Acc:1309057]	303399	D4A0A2
ENSRNOG00000000368	927.391	1283.41	571.376	0.445203	-1.16746	0.000353482	0.0435645	20	53789760	54517709	-	4938	Grik2	GO:0001662;GO:0004970;GO:0004970;GO:0005216;GO:0006811;GO:0006874;GO:0007268;GO:0014069;GO:0015276;GO:0015277;GO:0016020;GO:0016020;GO:0019228;GO:0032983;GO:0035249;GO:0038023;GO:0042391;GO:0042734;GO:0043025;GO:0043524;GO:0045202;GO:0045211;GO:0048169;GO:0048172;GO:0051967;GO:0060079;GO:0060080;GO:0098686;GO:0098978;GO:0099507;GO:0120169;GO:1904315;GO:0004970;GO:0004970;GO:0005216;GO:0005216;GO:…	K05202	-	T;P	12SMD;KOG1054;1CY3H;0UNY0;09UD2;0DP5H;194JN;1AYFT;0V5CD	glutamate ionotropic receptor kainate type subunit 2 [Source:RGD Symbol;Acc:2733]	54257	P42260
ENSRNOG00000059463	1092.26	682.594	1501.93	2.20033	1.13772	0.000354163	0.0435645	2	189609800	189615366	+	2411	Slc39a1	GO:0001701;GO:0001701;GO:0005102;GO:0005385;GO:0005385;GO:0005385;GO:0005886;GO:0005886;GO:0005886;GO:0006829;GO:0006829;GO:0016020;GO:0016020;GO:0016020;GO:0016020;GO:0016021;GO:0030001;GO:0030001;GO:0046873;GO:0046873;GO:0048701;GO:0048701;GO:0055085;GO:0055085;GO:0060173;GO:0060173;GO:0071577;GO:0071577;GO:0071577;	K14709	-	-	-	solute carrier family 39 member 1 [Source:RGD Symbol;Acc:1305241]	361986	B5DEF5
ENSRNOG00000028187	51.0255	79.7649	22.2861	0.279397	-1.83961	0.00035685	0.0436004	3	59981959	59984489	+	1484	Sp9	GO:0030326;GO:1990837;	K09199	-	K	KOG1721	Sp9 transcription factor [Source:RGD Symbol;Acc:1559457]	366078	D3ZZ24
ENSRNOG00000023226	692.347	242.329	1142.36	4.71409	2.23698	0.000361167	0.0438336	2	193892589	193901236	+	573	S100a10	GO:0001765;GO:0005509;GO:0005509;GO:0006900;GO:0016020;GO:0016021;GO:0019897;GO:0042803;GO:0043547;GO:0044325;GO:0045121;GO:0051099;GO:0051496;GO:0051894;GO:0072659;GO:1900026;GO:1990665;	K17274	-	-	-	S100 calcium binding protein A10 [Source:RGD Symbol;Acc:628655]	81778	P05943;B3Y9H3
ENSRNOG00000018371	808.498	133.009	1483.99	11.157	3.47988	0.000371805	0.0448259	18	63130542	63140181	+	1751	Tubb6	GO:0000166;GO:0000226;GO:0000278;GO:0003924;GO:0003924;GO:0003924;GO:0005200;GO:0005200;GO:0005200;GO:0005525;GO:0005525;GO:0005525;GO:0005525;GO:0005737;GO:0005737;GO:0005856;GO:0005874;GO:0005874;GO:0005874;GO:0005874;GO:0005874;GO:0005874;GO:0007017;GO:0007017;	K07375	-	Z	0UFQ4;0DEPX;KOG1375;09TCM;12NDK;1CPDK;0V4BS;1B0XY	tubulin, beta 6 class V [Source:RGD Symbol;Acc:1305887]	307351	Q4QQV0
ENSRNOG00000040201	155.123	224.991	85.2554	0.378928	-1.4	0.000385286	0.0461456	2	19781408	19808937	-	1132	Atp6ap1l	GO:0016020;GO:0016021;GO:0030641;GO:0033180;GO:0033180;GO:0033181;GO:1902600;GO:1902600;	-	-	C	0DGSE;0V6H0;09VHR;1B532;193WS;1CRGG;13J2T;KOG3868;0UINA	ATPase H+ transporting accessory protein 1 like [Source:RGD Symbol;Acc:1564936]	361875	D3ZA00
ENSRNOG00000026466	461.398	641.861	280.935	0.437688	-1.19203	0.000389399	0.0462199	20	25990304	26163656	+	7675	Lrrtm3	GO:0005515;GO:0051965;GO:0098978;GO:0098978;GO:0099054;GO:0099061;GO:1902004;GO:1902004;GO:0005515;GO:0016020;GO:0016021;	-	-	T	0A09C;KOG0619;18VF8;1AX4W;0DM0P;0VB5B;1CWRW;0UHMD;13IFE	leucine rich repeat transmembrane neuronal 3 [Source:RGD Symbol;Acc:1304866]	294380	D3ZAL8
ENSRNOG00000037851	130.252	70.9697	189.535	2.67065	1.41719	0.000392869	0.0462199	11	89009931	89260297	-	3084	Spidr	GO:0000228;GO:0000228;GO:0000724;GO:0000724;GO:0005654;GO:0006974;GO:0010569;GO:0031334;GO:0070202;GO:0070202;GO:0071479;GO:0072711;GO:0072757;GO:2000781;GO:0000228;GO:0000228;GO:0000228;GO:0000724;GO:0000724;GO:0000724;GO:0005654;GO:0005654;GO:0006974;GO:0006974;GO:0010569;GO:0010569;GO:0031334;GO:0031334;GO:0070202;GO:0070202;GO:0070202;GO:0071479;GO:0071479;GO:0072711;GO:0072711;GO:0072757;GO:…	K22806	-	S	1CWAA;0IGEG;0DMF3;09ZWG;0VAT3;12SCD;18YMA;0UU50;1B4RP	scaffold protein involved in DNA repair [Source:RGD Symbol;Acc:1566036]	498119	A2VD15
ENSRNOG00000058609	334.795	472.277	197.313	0.417791	-1.25915	0.000393523	0.0462199	2	220481616	220535751	-	1662	Palmd	GO:0005737;GO:0008360;GO:0008360;GO:0016020;GO:0016020;	-	-	-	-	palmdelphin [Source:RGD Symbol;Acc:1305624]	-	-
ENSRNOG00000023208	293.596	412.77	174.422	0.422565	-1.24276	0.000400571	0.0467086	5	57876498	57881944	-	2332	Myorg	GO:0004553;GO:0004553;GO:0005789;GO:0005789;GO:0005975;GO:0005975;GO:0008152;GO:0016020;GO:0016021;GO:0016787;GO:0016798;GO:0031965;GO:0031965;GO:0043568;GO:0043568;GO:0048741;GO:0048741;GO:0048741;GO:0048741;GO:0051897;GO:0051897;	K24727	EC:3.2.1.-	G	18ZV8;12N4M;0V888;0DIMD;1CTC8;KOG1065;09X9Y;0UM3S;1AWN2	myogenesis regulating glycosidase [Source:RGD Symbol;Acc:1309821]	366360	D4AE63
ENSRNOG00000014832	267.389	157.59	377.187	2.39347	1.25911	0.000404511	0.0467086	8	116012121	116045954	-	2641	Mapkapk3	GO:0002224;GO:0004672;GO:0004674;GO:0005524;GO:0005654;GO:0006468;GO:0018105;GO:0032496;GO:0034097;GO:0044351;	K04444	EC:2.7.11.1	T	18UXI;12PZ5;0UTB0;KOG0604;1B3PJ;0DJR3;09YBC;0V7I5;1CVTI	MAPK activated protein kinase 3 [Source:RGD Symbol;Acc:1304980]	315994	Q66H84
ENSRNOG00000038427	123.054	183.806	62.3014	0.338952	-1.56085	0.000405381	0.0467086	14	78359682	78377825	-	1728	AABR07015812.1	-	-	-	S	0DPMU;13VKT;0VCV3;0UR2D;1CYKR;1B4IA;0A1ZV;0J1QI;196AG	-	-	-
ENSRNOG00000010085	204.123	289.933	118.314	0.408073	-1.2931	0.000414521	0.0474614	15	104026601	104115748	+	1895	Cldn10	GO:0005198;GO:0005198;GO:0005737;GO:0005886;GO:0005886;GO:0005886;GO:0005886;GO:0005923;GO:0005923;GO:0005923;GO:0005923;GO:0005923;GO:0007155;GO:0016020;GO:0016021;GO:0016021;GO:0016021;GO:0030054;GO:0043269;GO:0043269;GO:0070830;GO:0005198;GO:0005198;GO:0005737;GO:0005886;GO:0005886;GO:0005886;GO:0005923;GO:0005923;GO:0005923;GO:0005923;GO:0005923;GO:0007155;GO:0016020;GO:0016021;GO:0016021;GO:…	K06087	-	U	0DGF3;09V66;0V65R;13J0P;0IQ7E;1AYHK;18YGW;0URIF;1CR4T	claudin 10 [Source:RGD Symbol;Acc:1308027]	290485	G3V7A9
ENSRNOG00000004373	330.833	191.681	469.986	2.45192	1.29391	0.000446963	0.0508561	19	24846938	24854953	+	2029	Ddx39a	GO:0003676;GO:0004386;GO:0005524;GO:0000398;GO:0003676;GO:0004386;GO:0005524;GO:0005634;GO:0005737;GO:0006406;GO:0016607;GO:0042802;	K13182	EC:3.6.4.13	A	0UKS5;KOG0329;0V6I3;1CW5E;1B1Q1;09VIW;0DHKJ;190U5;12PBW	DExD-box helicase 39A [Source:RGD Symbol;Acc:619920]	89827	Q5U216
ENSRNOG00000017980	103.795	51.7849	155.806	3.00871	1.58914	0.000451687	0.0510632	1	198744050	198781750	+	4511	Itgal	GO:0001772;GO:0002291;GO:0002291;GO:0005911;GO:0007155;GO:0007155;GO:0007155;GO:0007157;GO:0007157;GO:0007159;GO:0007159;GO:0007160;GO:0007160;GO:0007166;GO:0007229;GO:0008305;GO:0008305;GO:0009897;GO:0009986;GO:0009986;GO:0016020;GO:0016021;GO:0022407;GO:0022409;GO:0030369;GO:0030369;GO:0034687;GO:0034687;GO:0035683;GO:0035683;GO:0042102;GO:0043113;GO:0043113;GO:0044877;GO:0046872;GO:0050798;GO:…	K05718	-	W	1CREA;0UGYZ;0V6ET;12R4T;KOG3637;0DGQF;09VFM;191BA;1B0IN	integrin subunit alpha L [Source:RGD Symbol;Acc:631424]	308995	Q3T1L6
ENSRNOG00000014156	17.1517	3.72339	30.58	8.21294	3.0379	0.000454394	0.0510632	3	2642531	2646648	+	2300	Fut7	GO:0005794;GO:0006486;GO:0006486;GO:0006486;GO:0008417;GO:0008417;GO:0016020;GO:0016020;GO:0016020;GO:0016021;GO:0016740;GO:0016757;GO:0032580;GO:0036065;GO:0001807;GO:0002361;GO:0002522;GO:0002523;GO:0002523;GO:0005794;GO:0005794;GO:0005802;GO:0005802;GO:0006486;GO:0006486;GO:0006486;GO:0006486;GO:0006486;GO:0006672;GO:0006672;GO:0006954;GO:0007566;GO:0007566;GO:0008417;GO:0008417;GO:0008417;GO:…	K07635	EC:2.4.1.-	G;E	0DND2;1CWH9;0VF77;12PZ7;1B1P7;0A4CD;1954B;KOG2619;0URPX	fucosyltransferase 7 [Source:RGD Symbol;Acc:735019]	296564	Q712G6
ENSRNOG00000048449	24.6318	4.65516	44.6084	9.58257	3.26041	0.000459299	0.0512978	10	92667869	92783410	+	2391	Itgb3	GO:0005178;GO:0005178;GO:0007155;GO:0007155;GO:0007155;GO:0007229;GO:0007229;GO:0007229;GO:0008305;GO:0008305;GO:0016020;GO:0016021;GO:0070527;GO:0070527;GO:0001954;GO:0005080;GO:0005178;GO:0005178;GO:0005925;GO:0007044;GO:0007155;GO:0007160;GO:0007229;GO:0008305;GO:0009897;GO:0009986;GO:0010628;GO:0010763;GO:0016324;GO:0019899;GO:0030334;GO:0030335;GO:0032880;GO:0032956;GO:0033690;GO:0035866;GO:…	-	-	W	KOG1226	integrin subunit beta 3 [Source:RGD Symbol;Acc:628868]	-	-
ENSRNOG00000030877	1902.15	3023.95	780.344	0.258055	-1.95425	0.000468182	0.0519711	X	118084890	118318039	+	4397	Htr2c	GO:0004930;GO:0004993;GO:0005887;GO:0007186;GO:0007626;GO:0007631;GO:0016021;GO:0004930;GO:0004930;GO:0004930;GO:0004993;GO:0004993;GO:0005886;GO:0005887;GO:0005887;GO:0007165;GO:0007186;GO:0007186;GO:0007186;GO:0007626;GO:0007626;GO:0007631;GO:0007631;GO:0016020;GO:0016021;GO:0016021;GO:0016021;GO:0098664;	K04157	-	T	KOG3656;13K0V;09VWK;18X1I;0V6V4;0DH4Q;1CRUZ;1ASRI;0UPP3	5-hydroxytryptamine receptor 2C [Source:RGD Symbol;Acc:2848]	25187	P08909;Q62842
ENSRNOG00000005615	499.85	145.612	854.087	5.86549	2.55225	0.000483733	0.0533719	4	97782512	97784842	-	1241	Gadd45a	GO:0000122;GO:0000185;GO:0005634;GO:0005634;GO:0005634;GO:0005634;GO:0005737;GO:0006469;GO:0007098;GO:0016525;GO:0016607;GO:0019900;GO:0033140;GO:0033140;GO:0042770;GO:0042803;GO:0043065;GO:0043537;GO:0043537;GO:0046330;GO:0046982;GO:0047485;GO:0051726;GO:0051726;GO:0051726;GO:0071260;GO:0071479;GO:0071850;GO:0071901;GO:1900745;GO:1990841;GO:2000379;	K04402	-	D;L	192I9;0V8X2;0UN20;12QUD;1AZ2H;0IFHI;1CU4I;0DJCA;09XZA	growth arrest and DNA-damage-inducible, alpha [Source:RGD Symbol;Acc:2654]	25112	Q66HL6
ENSRNOG00000050794	569.014	349.784	788.245	2.25352	1.17218	0.000489434	0.0536755	10	39390581	39405311	-	1176	Pdlim4	GO:0001725;GO:0005515;GO:0005634;GO:0005737;GO:0005856;GO:0019903;GO:0019903;GO:0030027;GO:0031532;GO:0031941;GO:0042803;GO:0046872;GO:0048471;GO:0051393;	K23353	-	Z;T	KOG1703;09Z3U;0VA18;0UN06;1AXGH;1CQB5;190D7;0DKJE;13DHP	PDZ and LIM domain 4 [Source:RGD Symbol;Acc:3575]	24915	P36202
ENSRNOG00000043286	273.219	381.951	164.488	0.430652	-1.21541	0.000506902	0.0552023	19	10861406	10884047	-	1716	Cpne2	GO:0005544;GO:0005634;GO:0005634;GO:0005737;GO:0005737;GO:0005886;GO:0005886;GO:0005886;GO:0071277;GO:0071277;GO:0071277;GO:0005544;GO:0005634;GO:0005737;GO:0005886;GO:0005886;GO:0071277;GO:0071277;	K24524	-	T	0V43Q;0USSQ;09T4Y;KOG1327;12Q7Z;0DEG5;1CRU2;18Z86;1B13I	copine 2 [Source:RGD Symbol;Acc:1586036]	498972	H1UBM7
ENSRNOG00000008219	47.058	76.2218	17.8943	0.234766	-2.0907	0.000509419	0.0552023	8	62811173	62893087	-	2981	Ccdc33	GO:0005777;GO:0005777;	-	-	S;W	1AS0Y;0IJ8S;0DRA6;13KQB;1D0FF;0A3PC;0USB7;0VEI5	coiled-coil domain containing 33 [Source:RGD Symbol;Acc:1561126]	315712	Q5XIR4
ENSRNOG00000005424	1984.01	1171.47	2796.56	2.38723	1.25534	0.000516568	0.0556457	6	42852683	42859927	+	3641	Odc1	GO:0003824;GO:0003824;GO:0006596;GO:0006596;GO:0001822;GO:0001822;GO:0003824;GO:0003824;GO:0004586;GO:0004586;GO:0004586;GO:0004586;GO:0004586;GO:0004586;GO:0005737;GO:0005737;GO:0005737;GO:0005829;GO:0005829;GO:0006595;GO:0006596;GO:0006596;GO:0006596;GO:0008284;GO:0008284;GO:0009446;GO:0009615;GO:0009615;GO:0016829;GO:0016831;GO:0033387;GO:0033387;GO:0033387;GO:0033387;GO:0042176;GO:0042176;GO:…	K01581	EC:4.1.1.17	E	0V441;12P9T;1ATE0;KOG0622;09T5B;0DGPX;1CRDR;0UH37;18TFZ	ornithine decarboxylase 1 [Source:RGD Symbol;Acc:3227]	24609	P09057
ENSRNOG00000013987	986.327	345.738	1626.92	4.70563	2.23439	0.000525261	0.055884	7	12471824	12518654	+	7781	Sbno2	GO:0002281;GO:0002281;GO:0005634;GO:0006355;GO:0006355;GO:0006355;GO:0030282;GO:0030316;GO:0030316;GO:0031490;GO:0042393;GO:0045892;GO:0045892;GO:0045944;GO:0045944;GO:0050727;GO:0050727;GO:0050727;GO:0050727;GO:0061430;GO:0071222;GO:0071348;GO:0071354;GO:0071354;GO:0072674;GO:0072675;GO:1990830;GO:0002281;GO:0002281;GO:0002281;GO:0002281;GO:0005634;GO:0006355;GO:0006355;GO:0006355;GO:0030282;GO:…	-	-	T;K	0A037;0DMI8;KOG1513;12NTI;191FB;0VAZE;1ATNQ;1CXV4;0UPHZ	strawberry notch homolog 2 [Source:RGD Symbol;Acc:1307194]	314619	D3ZDU8
ENSRNOG00000006789	325.162	196.784	453.54	2.30476	1.20462	0.000525476	0.055884	7	70580198	70585084	+	925	Ddit3	GO:0000122;GO:0000122;GO:0000976;GO:0000976;GO:0000978;GO:0001228;GO:0001955;GO:0003677;GO:0003677;GO:0003677;GO:0003700;GO:0003700;GO:0003700;GO:0003700;GO:0005634;GO:0005634;GO:0005634;GO:0005737;GO:0005737;GO:0005770;GO:0006355;GO:0006355;GO:0006355;GO:0006355;GO:0006357;GO:0006915;GO:0006915;GO:0006983;GO:0006986;GO:0006986;GO:0007049;GO:0007050;GO:0007050;GO:0007605;GO:0008134;GO:0008134;GO:…	K04452	-	K	1DG2M;0E96W;0B5Y7;197DN;1BBCY;0ISXY;0V3NR;13FFP;0WIM3	DNA-damage inducible transcript 3 [Source:RGD Symbol;Acc:62391]	29467	Q496Y7
ENSRNOG00000009088	1657.77	1022.73	2292.82	2.24185	1.16469	0.000532892	0.055884	7	26946125	26984400	-	3430	Txnrd1	GO:0001650;GO:0004791;GO:0005654;GO:0016491;GO:0016668;GO:0045454;GO:0050660;GO:0055114;GO:0000166;GO:0004791;GO:0004791;GO:0004791;GO:0004791;GO:0016491;GO:0016491;GO:0016491;GO:0016668;GO:0016668;GO:0045454;GO:0045454;GO:0050660;GO:0050660;GO:0055114;GO:0098869;	K22182	EC:1.8.1.9	Q;O	1CVEN;09UWI;KOG0405;0UPJN;12PHT;0V5W9;1AUW3;0DKK6;190DN	thioredoxin reductase 1 [Source:RGD Symbol;Acc:61959]	58819	-
ENSRNOG00000016316	155.57	85.7125	225.428	2.63005	1.39509	0.000535019	0.055884	4	120825699	120840111	-	3261	Mcm2	GO:0000785;GO:0003677;GO:0003688;GO:0005524;GO:0005634;GO:0005634;GO:0005634;GO:0005654;GO:0005664;GO:0005737;GO:0006260;GO:0006268;GO:0006270;GO:0006270;GO:0006334;GO:0006915;GO:0019899;GO:0032508;GO:0042393;GO:0042555;GO:0042555;GO:0071353;GO:0090102;GO:1905775;	K02540	EC:3.6.4.12	L	12NMS;0VB69;1B39U;0UFCG;KOG0477;18XEB;0DQBE;0A0AA;1CZDC	minichromosome maintenance complex component 2 [Source:RGD Symbol;Acc:1305577]	312538	D3ZP96
ENSRNOG00000013090	793.874	158.172	1429.58	9.0381	3.17602	0.000541256	0.055884	17	13391467	13393243	-	1090	Gadd45g	GO:0000185;GO:0000185;GO:0000185;GO:0000186;GO:0005634;GO:0005634;GO:0005634;GO:0005634;GO:0005634;GO:0005737;GO:0005737;GO:0005737;GO:0006469;GO:0006915;GO:0007275;GO:0030154;GO:0042802;GO:0043065;GO:0043065;GO:0046330;GO:0046330;GO:0051726;GO:0051726;GO:0051726;GO:0051726;GO:0120162;GO:0120162;GO:1900745;GO:1900745;	K04402	-	T;D;L	0IW58;0DJIS;192VU;1AXT2;13PDM;0A34J;1CUBC;0UN9X;0VDZH	growth arrest and DNA-damage-inducible, gamma [Source:RGD Symbol;Acc:1311796]	291005	Q9WTQ7;B5DEF0
ENSRNOG00000019283	74.1399	33.5961	114.684	3.4136	1.77129	0.000543144	0.055884	1	166031272	166037424	-	1743	P2ry2	GO:0004930;GO:0004930;GO:0004930;GO:0005886;GO:0007165;GO:0007186;GO:0007186;GO:0007186;GO:0007200;GO:0007200;GO:0016020;GO:0016021;GO:0016021;GO:0016021;GO:0035589;GO:0045028;GO:0045028;GO:0070257;GO:0070257;GO:0097746;GO:0097746;	K04269	-	T	1B4D4;0DQE8;18SUJ;0IIAQ;0VA7A;1CZG5;0UU5Q;09ZC8;12RKR	purinergic receptor P2Y2 [Source:RGD Symbol;Acc:62088]	29597	P41232
ENSRNOG00000006828	191.543	75.0149	308.072	4.10681	2.03802	0.000544618	0.055884	6	75793960	75874235	-	4566	Baz1a	GO:0000228;GO:0000228;GO:0003674;GO:0005515;GO:0005575;GO:0005634;GO:0006261;GO:0006261;GO:0006338;GO:0006338;GO:0008150;GO:0008623;GO:0008623;GO:0046872;	K11655	-	B	KOG1245;0DEJM;1B30Q;09T8F;130KW;0UGEB;1CP9I;18S1W;0V47E	bromodomain adjacent to zinc finger domain, 1A [Source:RGD Symbol;Acc:1306199]	314126	P22282
ENSRNOG00000018646	458.462	90.9873	825.936	9.07749	3.18229	0.000544714	0.055884	18	29329764	29340403	-	2305	Hbegf	GO:0005154;GO:0005154;GO:0005615;GO:0005615;GO:0005887;GO:0007173;GO:0007173;GO:0008016;GO:0008083;GO:0008083;GO:0008201;GO:0008201;GO:0008284;GO:0009986;GO:0016477;GO:0030335;GO:0035313;GO:0048661;GO:0050731;GO:0051549;GO:0051897;GO:0060326;GO:0090303;	K08523	-	T	0IMHM;18XRI;0DIV7;13N5C;0V8FS;09XHR;1CTKI;0UHI0;1AWZI	heparin-binding EGF-like growth factor [Source:RGD Symbol;Acc:2526]	25433	Q06175
ENSRNOG00000037613	617.881	389.541	846.221	2.17235	1.11926	0.000547459	0.055884	10	56001799	56008885	-	4071	Kdm6b	GO:0005634;GO:0005634;GO:0006338;GO:0008013;GO:0010468;GO:0016577;GO:0043565;GO:0045165;GO:0045446;GO:0045944;GO:0046872;GO:0048333;GO:0055007;GO:0070301;GO:0071557;GO:0071557;GO:0071557;GO:0071558;GO:0071558;GO:0071558;GO:0120162;	K11448	EC:1.14.11.68	S;P;K;B	KOG1246;13F8S;0WIFR;KOG1124;0V3KT;0B5T8;0E93T;1DFZT	lysine demethylase 6B [Source:RGD Symbol;Acc:1307629]	363630	-
ENSRNOG00000012787	582.206	803.963	360.449	0.448341	-1.15733	0.000549477	0.055884	X	113948654	114110062	+	5335	Tmem164	GO:0016020;GO:0016021;	-	-	S	0URRV;0DNEM;1CXBY;0VBPY;1B193;1936P;0A0TC;13I5P;0IHH4	transmembrane protein 164 [Source:RGD Symbol;Acc:1563286]	367763	D3ZFX1
ENSRNOG00000059857	382.806	236.046	529.567	2.2435	1.16575	0.000553166	0.0559466	7	140349138	140356209	-	1609	Rnd1	GO:0003924;GO:0003924;GO:0003924;GO:0005102;GO:0005102;GO:0005525;GO:0005525;GO:0005525;GO:0005856;GO:0005886;GO:0005886;GO:0005912;GO:0005912;GO:0005938;GO:0007015;GO:0007015;GO:0007015;GO:0007162;GO:0007162;GO:0007163;GO:0007264;GO:0007264;GO:0008360;GO:0015629;GO:0016322;GO:0016322;GO:0016477;GO:0019901;GO:0030865;GO:0031410;GO:0032956;GO:0042995;GO:0043231;GO:0043231;	K07531	-	-	-	Rho family GTPase 1 [Source:RGD Symbol;Acc:1306338]	362993	Q5FVG9
ENSRNOG00000033026	279.898	438.519	121.278	0.276562	-1.85433	0.000562819	0.0566084	8	119691388	119744506	+	3450	Dclk3	GO:0000166;GO:0004672;GO:0004672;GO:0004672;GO:0004672;GO:0004672;GO:0005524;GO:0005524;GO:0005524;GO:0005634;GO:0005634;GO:0005634;GO:0005737;GO:0005737;GO:0005737;GO:0006468;GO:0006468;GO:0018105;GO:0018105;GO:0018105;GO:0035556;GO:0035556;GO:1900181;	K17530	EC:2.7.11.1	T;D	1CRZC;0V62X;KOG0615;09W08;12PM1;18WVY;1B0E6;0DH9B;0UQV8	doublecortin-like kinase 3 [Source:RGD Symbol;Acc:1309232]	316023	F1LWF2
ENSRNOG00000042717	190.672	110.305	271.038	2.45716	1.29699	0.000580827	0.0580987	2	197987705	197991574	-	1737	Ciart	GO:0000976;GO:0000976;GO:0000978;GO:0000978;GO:0005634;GO:0005634;GO:0032922;GO:0032922;GO:0032922;GO:0032922;GO:0045475;GO:0045892;GO:0045892;GO:0070888;GO:0000976;GO:0000976;GO:0000978;GO:0000978;GO:0000978;GO:0005634;GO:0005634;GO:0005634;GO:0032922;GO:0032922;GO:0032922;GO:0032922;GO:0032922;GO:0045475;GO:0045475;GO:0045892;GO:0045892;GO:0045892;GO:0070888;GO:0070888;	K21599	-	S	13N8G;1CS5D;0UJKF;0DHF8;09W5W;18V0E;0IICF;0V749;1B3U8	circadian associated repressor of transcription [Source:RGD Symbol;Acc:1566380]	365871	D3ZPV3
ENSRNOG00000003956	274.698	468.176	81.2204	0.173483	-2.52714	0.000586775	0.0583477	X	26315878	26376467	-	2298	Arhgap6	GO:0005096;GO:0005737;GO:0005829;GO:0007015;GO:0007165;GO:0043087;GO:0051497;GO:0051895;GO:0005096;GO:0007015;GO:0007165;GO:0043087;	K20631	-	T	KOG2710;12TDV;0A1AN;0VC6D	Rho GTPase activating protein 6 [Source:RGD Symbol;Acc:2323364]	100363276	-
ENSRNOG00000032240	108.83	33.3543	184.306	5.52571	2.46616	0.000593556	0.0583477	2	248178389	248197160	+	3108	Gbp5	GO:0003924;GO:0005525;GO:0005737;GO:0005794;GO:0009617;GO:0031410;GO:0032731;GO:0032731;GO:0032741;GO:0034067;GO:0042802;GO:0042803;GO:0045089;GO:0048471;GO:0051289;GO:0071346;GO:0071346;GO:1900017;GO:1900227;	K20898	-	S;K	0V5RR;0DG1U;09US8;18XUQ;1ASMB;KOG2037;1CQRC;0UHMY;13NFW	guanylate binding protein 5 [Source:RGD Symbol;Acc:1311040]	362050	B5DF73;F1M9F6
ENSRNOG00000008015	772.478	272.089	1272.87	4.67812	2.22593	0.000596095	0.0583477	6	109300433	109303299	+	1589	Fos	GO:0000976;GO:0000976;GO:0000978;GO:0000978;GO:0000978;GO:0000979;GO:0000979;GO:0000981;GO:0001102;GO:0001102;GO:0001228;GO:0001228;GO:0001661;GO:0003677;GO:0003677;GO:0003677;GO:0003677;GO:0003677;GO:0003682;GO:0003682;GO:0003690;GO:0003700;GO:0003700;GO:0003700;GO:0003700;GO:0003700;GO:0005515;GO:0005515;GO:0005634;GO:0005634;GO:0005634;GO:0005634;GO:0005634;GO:0005634;GO:0005654;GO:0005654;GO:…	K04379	-	K	0VBM4;1AWTS;18ZBU;13HYQ;1CX97;0UUEW;0A0QR;KOG1414;0DNC6	Fos proto-oncogene, AP-1 transcription factor subunit [Source:RGD Symbol;Acc:2626]	314322	P12841
ENSRNOG00000012546	385.185	212.352	558.017	2.62779	1.39385	0.000596137	0.0583477	5	60809762	60837764	+	4405	Frmpd1	GO:0005515;GO:0005575;GO:0005856;GO:0005856;GO:0005886;GO:0005886;GO:0005886;GO:0005938;GO:0005938;GO:0005938;GO:0007165;GO:0007165;GO:0008150;GO:0008277;GO:0008277;GO:0032991;GO:0032991;GO:0090150;GO:0090150;	K23954	-	S;O;T	1CV4E;18Z3W;0DKAH;KOG3552;0V7SU;12QFH;0UJ3R;09WUV;1AWKT	FERM and PDZ domain containing 1 [Source:RGD Symbol;Acc:1305229]	313244	-
ENSRNOG00000029191	83.527	34.1893	132.865	3.88615	1.95834	0.000601783	0.0585854	2	248219428	248239899	+	1878	LOC685067	GO:0003924;GO:0005525;GO:0020005;GO:0031410;GO:0042832;GO:0044406;GO:0050830;GO:0071346;	-	-	S;O;T;D;C;K	191WI;0V9BC;134KU;09XSJ;1AYRV;KOG2037;1CUKV;0UNNF;0DJTQ	similar to guanylate binding protein family, member 6 [Source:RGD Symbol;Acc:1583235]	-	-
ENSRNOG00000025476	142.383	49.6128	235.153	4.73976	2.24481	0.000608687	0.0589422	1	242572533	242577817	+	2077	Tmem252	-	-	-	S	0A71H;1B5B8;193AW;0UV15;13U5C;0IZEX;1D3B1;0VHQK;0DSFX	transmembrane protein 252 [Source:RGD Symbol;Acc:1359349]	361744	Q6AXS2
ENSRNOG00000001414	1819.92	24.323	3615.51	148.646	7.21574	0.000619221	0.0596451	12	22641104	22651482	+	3063	Serpine1	GO:0001525;GO:0002020;GO:0004867;GO:0005102;GO:0005576;GO:0005615;GO:0005615;GO:0010469;GO:0010757;GO:0010951;GO:0014912;GO:0030194;GO:0030336;GO:0032757;GO:0033629;GO:0035491;GO:0045766;GO:0048260;GO:0050729;GO:0050829;GO:0051918;GO:0061044;GO:0062023;GO:0070062;GO:0071222;GO:0090026;GO:0090399;GO:0097187;GO:1901331;GO:1902042;GO:2000098;GO:2000352;	K03982	-	V	12U1A;0DFHY;0UGVD;1ASJ0;09U85;KOG2392;0V57A;1CQ7S;18TF4	serpin family E member 1 [Source:RGD Symbol;Acc:3249]	24617	P20961
ENSRNOG00000014297	1249.25	801.151	1697.34	2.11863	1.08313	0.000626395	0.0600186	3	160872503	160891190	-	2488	Sdc4	GO:0001843;GO:0009986;GO:0010762;GO:0016020;GO:0042060;GO:0042130;GO:0042802;GO:0060122;GO:0070053;GO:1903543;GO:1903553;	K16338	-	W;T	13RBQ;0VDJG;0UKWC;1CZD7;1ATRY;0IXIG;192PV;0A2PM;0DQBB	syndecan 4 [Source:RGD Symbol;Acc:3650]	24771	P34901
ENSRNOG00000006859	2060.04	1325.55	2794.53	2.1082	1.07601	0.000641571	0.0611508	4	342302	350515	+	2420	Insig1	GO:0003674;GO:0005575;GO:0005783;GO:0005783;GO:0005783;GO:0005789;GO:0006629;GO:0006641;GO:0006695;GO:0006695;GO:0006991;GO:0008142;GO:0008142;GO:0008202;GO:0008203;GO:0008203;GO:0008203;GO:0008203;GO:0008289;GO:0010894;GO:0016020;GO:0016021;GO:0016126;GO:0016126;GO:0032355;GO:0032869;GO:0032869;GO:0032933;GO:0032933;GO:0032937;GO:0032937;GO:0033993;GO:0036315;GO:0036316;GO:0036316;GO:0042472;GO:…	-	-	T	KOG4363;1AYMX;0DHAY;09W1V;1CQV1;12UD5;0V703;0UJE9;191JJ	insulin induced gene 1 [Source:RGD Symbol;Acc:708457]	64194	Q08755
ENSRNOG00000015845	1486.08	722.429	2249.72	3.11411	1.63882	0.000647428	0.0613258	3	11921715	11971327	+	3678	Niban2	GO:0003713;GO:0005737;GO:0005829;GO:0005829;GO:0005886;GO:0005912;GO:0008285;GO:0032274;GO:0043066;GO:0045892;GO:0045893;GO:2000279;GO:2000679;	-	-	O;T	0IFR1;0DHAS;1AWIM;09X6Z;18SRM;0V85K;13HCM;1CS0W;0UM2T	niban apoptosis regulator 2 [Source:RGD Symbol;Acc:1307018]	362115	B4F7E8
ENSRNOG00000019857	1147.41	1697.06	597.756	0.35223	-1.50541	0.000650145	0.0613258	7	11582984	11628929	+	2898	Gng7	GO:0005834;GO:0005834;GO:0005886;GO:0007165;GO:0007186;GO:0007186;GO:0016020;GO:0031681;GO:0031681;	K04543	-	T	0DVJW;0UWDM;13U9E;KOG4119;0A9DD;1D4TQ;193UN;1B6MV;0VKAC	G protein subunit gamma 7 [Source:RGD Symbol;Acc:61860]	58979	P43425;A0A0G2JSR6
ENSRNOG00000001311	308.267	429.683	186.85	0.434855	-1.20139	0.000656803	0.0614441	20	14557740	14573519	-	1247	Rab36	GO:0003924;GO:0003924;GO:0005525;GO:0005525;	K07922	-	U	0DF4C;0V4TD;KOG0094;1AX4G;0UMMU;09TU3;1CPU8;191F2;13KHZ	RAB36, member RAS oncogene family [Source:RGD Symbol;Acc:1596098]	690407	B2RZ53
ENSRNOG00000046848	53.9354	16.3555	91.5154	5.5954	2.48424	0.000658148	0.0614441	8	103459161	103484535	+	1541	PCOLCE2	GO:0005515;GO:0005518;GO:0008201;GO:0016504;GO:1990830;	K24361	-	O	0DI6V;0V7UK;1AUFA;09WWE;1CSX8;0IEMJ;18UKE;12Q5Y;0UIY8	procollagen C-endopeptidase enhancer 2 [Source:RGD Symbol;Acc:1595195]	684050	B1WBU3
ENSRNOG00000032917	914.883	363.454	1466.31	4.03439	2.01235	0.000663912	0.0616659	12	17252093	17263477	+	3289	Zfand2a	GO:0000502;GO:0008270;GO:0032436;GO:0071243;GO:0008270;	K24685	-	S;T	0VDR8;KOG3183;0DQHX;12RE3;19369;0A2VU;1CZK2;1B5PH;0UV4A	zinc finger AN1-type containing 2A [Source:RGD Symbol;Acc:1310991]	360772	Q5U2P3
ENSRNOG00000028670	99.6842	145.207	54.1616	0.372997	-1.42276	0.000668752	0.0618002	11	31223074	31238026	-	2707	RGD1562726	-	-	-	S	0A1JT;1CTEP;0VCFE;13HIH;0IJDH;0UNUQ;1B0PB;0DP7T	similar to Putative protein C21orf62 homolog [Source:RGD Symbol;Acc:1562726]	498060	D3ZJP2
ENSRNOG00000005883	65.7442	109.076	22.4124	0.205475	-2.28296	0.000697364	0.0638807	15	11632759	11812485	-	3385	Nek10	GO:0004672;GO:0004672;GO:0004674;GO:0005524;GO:0006468;GO:0006468;GO:0031954;GO:0043406;GO:0070372;GO:0120197;GO:1902749;GO:1902911;GO:0004672;GO:0004674;GO:0005524;GO:0006468;	K20879	EC:2.7.11.1	T	KOG0589;1AWQN;1CVNK;18Z38;0DKTN;0UPV7;0VA8H;09ZBB;12PYJ	NIMA-related kinase 10 [Source:RGD Symbol;Acc:1564342]	305710	-
ENSRNOG00000011971	293.888	151.889	435.887	2.86977	1.52093	0.000698284	0.0638807	4	157143592	157155609	-	3018	C1s	GO:0004252;GO:0004252;GO:0004252;GO:0005509;GO:0005509;GO:0006508;GO:0006508;GO:0006958;GO:0006958;GO:0008236;GO:0042802;GO:0004252;GO:0004252;GO:0006508;GO:0006508;GO:0006958;GO:0006958;	K01331	EC:3.4.21.42	O;E	09UJW;KOG3627;1CPG5;13HY4;0UQTZ;0DFVH;18VM5;1AXUV;0V5J3	complement C1s [Source:RGD Symbol;Acc:619983]	192262	Q6P6T1
ENSRNOG00000020833	1099.93	1491.66	708.211	0.474781	-1.07467	0.000710258	0.0645697	8	118333706	118347582	+	1716	Cspg5	GO:0005794;GO:0007399;GO:0007399;GO:0016020;GO:0016021;GO:0030660;GO:0050804;GO:0098978;GO:0098982;GO:0099055;GO:0099550;GO:2000300;	K08116	-	T	0UGV8;0IJTR;18XNK;1ASIU;09Z9Z;0DKS7;0VA73;1CVKU;12T47	chondroitin sulfate proteoglycan 5 [Source:RGD Symbol;Acc:2431]	50568	Q9ERQ6
ENSRNOG00000010938	345.759	479.107	212.412	0.44335	-1.17348	0.00071391	0.0645697	1	91433030	91448564	+	1877	Slc7a10	GO:0006865;GO:0015175;GO:0015175;GO:0015804;GO:0015804;GO:0016020;GO:0016020;GO:0016020;GO:0016021;GO:0022857;GO:0022857;GO:0042941;GO:0042942;GO:0055085;GO:0055085;	K13782	-	E	12P2T;09V1W;1CWAQ;0DJGF;0V61J;1AW9C;18S0U;0UKI7;KOG1287	solute carrier family 7 member 10 [Source:RGD Symbol;Acc:621672]	114518	Q75T81
ENSRNOG00000019573	179.116	253.602	104.63	0.412574	-1.27728	0.000716456	0.0645697	19	37913336	37916813	-	1362	Lcat	GO:0006629;GO:0008374;	K00650	EC:2.3.1.43	I	0V6IX;18ZWH;12S4B;09VJS;1AX9Z;KOG2369;0UIYR;0DGU9;1CRIE	lecithin cholesterol acyltransferase [Source:RGD Symbol;Acc:2993]	24530	P18424
ENSRNOG00000059715	525.719	723.084	328.355	0.454103	-1.13891	0.000728806	0.0653592	14	71895246	71973419	-	4896	Cc2d2a	GO:0001822;GO:0001843;GO:0007224;GO:0007368;GO:0007507;GO:0035082;GO:0035869;GO:0036038;GO:0043010;GO:0044458;GO:0060271;GO:1904491;GO:1905515;GO:1990403;	K19352	-	-	-	coiled-coil and C2 domain containing 2A [Source:RGD Symbol;Acc:1561042]	498386	-
ENSRNOG00000003704	122.209	176.151	68.2666	0.387546	-1.36756	0.00075417	0.0673023	14	70015754	70086143	+	4328	Fam184b	-	-	-	S	0DKQK;0VA5Q;1CVJ1;1AVRZ;0II9D;0UT1Y;130ST;18YB5;09Z8D	family with sequence similarity 184, member B [Source:RGD Symbol;Acc:1564950]	289671	-
ENSRNOG00000012988	1135.82	1575.13	696.509	0.442192	-1.17725	0.000760556	0.0675411	1	59156251	59214452	+	2866	Lix1	GO:0005737;GO:0097352;	-	-	S	0DJYJ;0IH13;09YI3;18XRX;12T2A;0V9FV;1AYB1;0UNTW;1CUS6	limb and CNS expressed 1 [Source:RGD Symbol;Acc:1309454]	292381	D3ZAG6
ENSRNOG00000046667	288.161	110.652	465.671	4.20844	2.07329	0.000771739	0.0682015	1	80214494	80221710	-	3741	Fosb	GO:0000978;GO:0000978;GO:0000981;GO:0001228;GO:0003677;GO:0003677;GO:0003677;GO:0003690;GO:0003700;GO:0003700;GO:0003700;GO:0005634;GO:0005634;GO:0005634;GO:0005634;GO:0006357;GO:0006357;GO:0006357;GO:0006366;GO:0007565;GO:0009612;GO:0032570;GO:0032870;GO:0042493;GO:0043278;GO:0043565;GO:0045944;GO:0051412;GO:0051591;GO:0071277;GO:1990837;GO:0000978;GO:0000978;GO:0000978;GO:0000981;GO:0001228;GO:…	K09029	-	K	1B091;0VDJP;0UQ9C;1CW78;18YMU;138Q1;KOG1414;0DMC2;0A2PT	FosB proto-oncogene, AP-1 transcription factor subunit [Source:RGD Symbol;Acc:1308198]	100360880	D3ZLB7
ENSRNOG00000014029	996.544	1346.4	646.691	0.480312	-1.05796	0.000776435	0.068285	X	121578940	121731543	-	3194	Klhl13	GO:0003674;GO:0004842;GO:0004842;GO:0005515;GO:0005575;GO:0008150;GO:0016567;GO:0016567;GO:0030496;GO:0031463;GO:0031463;GO:0032465;GO:0032465;GO:0047485;GO:0047485;GO:0097602;GO:0097602;	K10447	-	-	-	kelch-like family member 13 [Source:RGD Symbol;Acc:1559646]	313445	-
ENSRNOG00000043099	1064.69	687.317	1442.06	2.0981	1.06908	0.000780769	0.0683361	20	32213148	32232632	-	4380	Ddx21	GO:0003676;GO:0003723;GO:0004386;GO:0005524;	K16911	EC:3.6.4.13	A	0V7JV;1CSMF;0DHWV;KOG0331;13I3P;18ZE4;09WM6;0UFEA;1AVTD	DExD-box helicase 21 [Source:RGD Symbol;Acc:1307306]	317399	Q3B8Q1
ENSRNOG00000019354	873.1	1184.75	561.449	0.473897	-1.07735	0.000791554	0.0686964	17	1029048	1093873	-	7515	Ptch1	GO:0008158;GO:0016021;GO:0000122;GO:0000122;GO:0001658;GO:0001658;GO:0001701;GO:0001701;GO:0001709;GO:0001709;GO:0001841;GO:0001841;GO:0001843;GO:0001843;GO:0003007;GO:0003007;GO:0003674;GO:0005113;GO:0005113;GO:0005119;GO:0005119;GO:0005119;GO:0005634;GO:0005794;GO:0005794;GO:0005886;GO:0005886;GO:0005886;GO:0005886;GO:0005901;GO:0005901;GO:0005929;GO:0005929;GO:0007165;GO:0007165;GO:0007224;GO:…	K06225	-	T	KOG1935;1CR60;12QN4;0V677;09V7N;1B3AN;0DGGD;19183;0UMP2	patched 1 [Source:RGD Symbol;Acc:621425]	89830	-
ENSRNOG00000024426	165.271	232.528	98.0146	0.421517	-1.24634	0.000792433	0.0686964	18	69841053	69849389	+	1022	AABR07032520.1	-	-	-	O	KOG2032	-	-	-
ENSRNOG00000018003	61.0423	10.4486	111.636	10.6843	3.41742	0.000797476	0.068806	2	25222328	25235275	-	2975	F2rl1	GO:0001965;GO:0002286;GO:0002690;GO:0002720;GO:0004930;GO:0004930;GO:0004930;GO:0005769;GO:0005886;GO:0005887;GO:0007186;GO:0007186;GO:0007204;GO:0007204;GO:0007596;GO:0010804;GO:0014068;GO:0015057;GO:0016021;GO:0030193;GO:0030335;GO:0030836;GO:0031143;GO:0031274;GO:0031681;GO:0032682;GO:0032722;GO:0032722;GO:0032729;GO:0032731;GO:0032733;GO:0032755;GO:0032757;GO:0032930;GO:0034137;GO:0034140;GO:…	K04234	-	T	1AT52;0UP7N;1CQ23;18TQ1;09YVG;0IGEM;12SCP;0V9T9;0DFCD	F2R like trypsin receptor 1 [Source:RGD Symbol;Acc:620866]	116677	Q63645
ENSRNOG00000015156	89.4572	36.9065	142.008	3.84778	1.94403	0.00080272	0.0688385	1	218652917	218657925	-	844	Gal	GO:0001664;GO:0004966;GO:0004966;GO:0004966;GO:0005179;GO:0005179;GO:0005179;GO:0005184;GO:0005184;GO:0005184;GO:0005184;GO:0005576;GO:0005576;GO:0005576;GO:0005615;GO:0005615;GO:0005615;GO:0005737;GO:0005794;GO:0006954;GO:0007218;GO:0007218;GO:0007218;GO:0007399;GO:0007631;GO:0008285;GO:0010737;GO:0010737;GO:0019933;GO:0019933;GO:0030141;GO:0030141;GO:0031763;GO:0031764;GO:0031764;GO:0031764;GO:…	K05244	-	W;T	13SP2;0VK86;0A9GV;1B6FH;193RX;0UWA1;0DV69;0IZPR;1D4GN	galanin and GMAP prepropeptide [Source:RGD Symbol;Acc:61954]	29141	P10683
ENSRNOG00000048782	231.592	331.119	132.064	0.398842	-1.32611	0.000808287	0.0688385	4	122994425	123040609	-	3150	Wnt7a	GO:0000578;GO:0000578;GO:0001502;GO:0001502;GO:0001525;GO:0001525;GO:0002062;GO:0002062;GO:0005102;GO:0005102;GO:0005102;GO:0005102;GO:0005109;GO:0005109;GO:0005109;GO:0005125;GO:0005125;GO:0005125;GO:0005515;GO:0005575;GO:0005576;GO:0005576;GO:0005615;GO:0007269;GO:0007269;GO:0007275;GO:0007275;GO:0007275;GO:0008284;GO:0009953;GO:0009953;GO:0009986;GO:0009986;GO:0010595;GO:0010595;GO:0010628;GO:…	K00572	-	T	0UM7X;KOG3913;1CRRV;09V80;1B07S;12R4V;0V67H;18UKX;0DN64	Wnt family member 7A [Source:RGD Symbol;Acc:69079]	114850	M0R9D3
ENSRNOG00000010665	9.19366	0.980127	17.4072	17.7601	4.15057	0.000813712	0.0688385	10	87057136	87067456	-	1426	Ccr7	GO:0002408;GO:0002408;GO:0002606;GO:0002606;GO:0002885;GO:0002885;GO:0002922;GO:0002922;GO:0004930;GO:0004930;GO:0004930;GO:0004950;GO:0004950;GO:0005739;GO:0005886;GO:0005886;GO:0005886;GO:0005886;GO:0006935;GO:0006935;GO:0006935;GO:0006935;GO:0006954;GO:0006954;GO:0006955;GO:0006955;GO:0006955;GO:0006955;GO:0006955;GO:0007165;GO:0007186;GO:0007186;GO:0007186;GO:0007204;GO:0009897;GO:0009897;GO:…	K04182	-	T	13IRZ;0DEJ4;09T7V;1CP8Z;0IMBE;18XTR;0V46V;1AVXW;0UFI1	C-C motif chemokine receptor 7 [Source:RGD Symbol;Acc:735151]	287673	Q6U2D6
ENSRNOG00000022859	16.0376	1.26467	30.8106	24.3625	4.60659	0.000814075	0.0688385	9	14727976	14809447	-	1027	Trem1	GO:0002526;GO:0038023;	K14362	-	T	1967I;0A7B0;0UUXD;0J3SD;0VI5H;1B5DQ;13YAU;1D33N;0DU5D	triggering receptor expressed on myeloid cells 1 [Source:RGD Symbol;Acc:1309467]	301229	-
ENSRNOG00000017373	1101.43	1491.12	711.751	0.477328	-1.06695	0.000817689	0.0688385	15	51465148	51485692	-	5132	Rhobtb2	GO:0003924;GO:0003924;GO:0003924;GO:0005515;GO:0005525;GO:0005525;GO:0005525;GO:0005856;GO:0005886;GO:0005938;GO:0007015;GO:0007163;GO:0007264;GO:0007264;GO:0008360;GO:0019901;GO:0030865;GO:0031410;GO:0032956;GO:0042995;GO:0043231;GO:0043652;	K07868	-	Z;S	0V6A6;09VAV;0UIDA;18VPU;12P76;1AW5Q;KOG0393;1CR96;0DGJC	Rho-related BTB domain containing 2 [Source:RGD Symbol;Acc:1309924]	306004	Q5BJV7
ENSRNOG00000061304	1972.42	2671.99	1272.85	0.476367	-1.06986	0.000820854	0.0688385	X	157239306	157312028	-	5132	Atp2b3	GO:0000166;GO:0000166;GO:0000166;GO:0003407;GO:0005388;GO:0005388;GO:0005388;GO:0005388;GO:0005388;GO:0005516;GO:0005524;GO:0005524;GO:0005524;GO:0005886;GO:0005886;GO:0005887;GO:0006811;GO:0006816;GO:0006874;GO:0007420;GO:0015085;GO:0016020;GO:0016020;GO:0016020;GO:0016021;GO:0016021;GO:0016021;GO:0016887;GO:0019829;GO:0030165;GO:0030165;GO:0043231;GO:0045121;GO:0046872;GO:0051480;GO:0051480;GO:…	K05850	EC:7.2.2.10	-	-	ATPase plasma membrane Ca2+ transporting 3 [Source:RGD Symbol;Acc:621304]	29599	Q64568
ENSRNOG00000033192	245.526	45.7055	445.346	9.74381	3.28449	0.000837473	0.0688385	2	56110777	56151531	-	2894	Osmr	GO:0004896;GO:0004924;GO:0005515;GO:0005900;GO:0008284;GO:0016020;GO:0016324;GO:0019838;GO:0034097;GO:0038165;GO:0004896;GO:0005515;GO:0016020;	K05057	-	W;T	0V9S1;09YU5;0UMMA;18ZNE;13IDN;1AUIC;1CV2Q;0DK8V;0IFCQ	oncostatin M receptor [Source:RGD Symbol;Acc:1302983]	310132	Q65Z14
ENSRNOG00000033693	44.8137	20.101	69.5264	3.45885	1.79029	0.000839185	0.0688385	2	30376419	30458542	-	6127	Naip2	GO:0005524;GO:0006915;GO:0006954;GO:0006954;GO:0016045;GO:0016045;GO:0042742;GO:0042742;GO:0043027;GO:0043027;GO:0043027;GO:0043066;GO:0043066;GO:0043154;GO:0070269;GO:0070269;GO:0071391;GO:0072557;GO:0072557;	-	-	-	-	NLR family, apoptosis inhibitory protein 2 [Source:MGI Symbol;Acc:MGI:1298226]	-	-
ENSRNOG00000000902	10044.4	5872.78	14216.1	2.42068	1.27541	0.000844601	0.0688385	12	6322668	6341902	-	3446	Hsph1	GO:0000774;GO:0005654;GO:0005737;GO:0005829;GO:0005874;GO:0032991;GO:0043014;GO:0051085;	K09485	-	O	1CYEZ;12NET;0DHTZ;1B4CT;09WIN;0V7H7;18XA2;KOG0103;0UK3I	heat shock protein family H (Hsp110) member 1 [Source:RGD Symbol;Acc:1311609]	288444	Q66HA8
ENSRNOG00000019342	348.051	522.492	173.611	0.332276	-1.58955	0.000844989	0.0688385	1	198100586	198104109	-	1223	Sult1a1	GO:0008146;	K01014	EC:2.8.2.1	S;J	0UQ9S;1B00G;0DF5W;194BP;KOG1584;09TVG;0V4UQ;12P7D;1CPVI	sulfotransferase family 1A member 1 [Source:RGD Symbol;Acc:3767]	83783	P17988
ENSRNOG00000029768	27.8433	0	55.6866	Inf	Inf	0.000846123	0.0688385	10	69476775	69478462	+	677	Ccl12	GO:0001525;GO:0002548;GO:0002548;GO:0002687;GO:0003674;GO:0004672;GO:0005125;GO:0005575;GO:0005576;GO:0005576;GO:0005576;GO:0005615;GO:0005615;GO:0006468;GO:0006816;GO:0006874;GO:0006887;GO:0006935;GO:0006954;GO:0006954;GO:0006955;GO:0006955;GO:0007010;GO:0007186;GO:0007267;GO:0008009;GO:0008009;GO:0008009;GO:0008009;GO:0008360;GO:0016004;GO:0030593;GO:0031640;GO:0031727;GO:0043547;GO:0044828;GO:…	K14624	-	W	0A9MF;0J1ST;0VKCZ;13VZX;1D54A;0DVIR;0UW9M;1B6T0	chemokine (C-C motif) ligand 12 [Source:RGD Symbol;Acc:1309255]	287562	D4ABS1
ENSRNOG00000019177	1065.75	1443.13	688.365	0.476994	-1.06796	0.000847063	0.0688385	18	28781349	28832428	+	4397	Psd2	GO:0005085;GO:0005515;GO:0005543;GO:0005543;GO:0016020;GO:0030425;GO:0030425;GO:0032012;GO:0032012;GO:0032154;GO:0032154;GO:0032587;GO:0032587;GO:0032587;GO:0043025;GO:0043025;GO:0050790;GO:0098794;GO:0098794;GO:0098978;GO:0098978;	K12494	-	U	0UJDQ;0DHAJ;12PMY;192DR;09W1G;1CS0M;KOG0932;1AYUE;0V6ZS	pleckstrin and Sec7 domain containing 2 [Source:RGD Symbol;Acc:1311075]	307500	D4ACB6
ENSRNOG00000016553	71.6798	106.746	36.614	0.343002	-1.54371	0.000848279	0.0688385	5	157002826	157059508	-	4963	Vwa5b1	-	K24510	-	S	1B2KP;0V6M3;0UKPU;1CRKQ;0IFPF;12U4G;191ET;09VMZ;0DGWF	von Willebrand factor A domain containing 5B1 [Source:RGD Symbol;Acc:1308559]	313653	D3ZP60
ENSRNOG00000019780	52.365	24.3398	80.3902	3.30284	1.72371	0.000851494	0.0688385	2	211003046	211017778	-	3403	Sypl2	GO:0006874;GO:0006874;GO:0007507;GO:0007507;GO:0008021;GO:0008021;GO:0016020;GO:0016020;GO:0016020;GO:0016021;GO:0017075;GO:0030672;GO:0033292;GO:0033292;	-	-	P;U	18SPP;0IF8N;0A37U;0UU05;1AYGS;13E5U;1CZZ7;0DQV7;0VE2J	synaptophysin-like 2 [Source:RGD Symbol;Acc:1309907]	362018	D4A6M0
ENSRNOG00000008943	1213.79	1939.44	488.133	0.251688	-1.99029	0.000854573	0.0688385	5	17056419	17061837	-	1702	Penk	GO:0001662;GO:0001964;GO:0002118;GO:0007218;GO:0007626;GO:0009617;GO:0019233;GO:0007218;	K18832	-	O;T;W	0DMB6;0IJUY;13JXE;0VA4A;18X49;1ASMG;0UP1B;1CW6B;0A412	proenkephalin [Source:RGD Symbol;Acc:68946]	29237	P04094
ENSRNOG00000053272	1215.87	713.972	1717.77	2.40593	1.2666	0.000863594	0.0690316	13	51022681	51030802	+	1829	Chi3l1	GO:0003674;GO:0005576;GO:0005576;GO:0005615;GO:0005615;GO:0005615;GO:0005615;GO:0005615;GO:0005737;GO:0005737;GO:0005783;GO:0005783;GO:0005975;GO:0005975;GO:0006032;GO:0006915;GO:0006954;GO:0006954;GO:0006954;GO:0007250;GO:0007250;GO:0008061;GO:0008061;GO:0008061;GO:0008061;GO:0008061;GO:0008061;GO:0009612;GO:0009612;GO:0009612;GO:0010800;GO:0010800;GO:0030246;GO:0030324;GO:0030324;GO:0030324;GO:…	K17523	-	-	-	chitinase 3 like 1 [Source:RGD Symbol;Acc:620874]	89824	Q9WTV1
ENSRNOG00000005352	44.6495	14.5736	74.7254	5.12744	2.35824	0.000865804	0.0690316	X	135240451	135250519	-	2448	Elf4	GO:0000978;GO:0000978;GO:0000981;GO:0000981;GO:0000981;GO:0001228;GO:0001228;GO:0001787;GO:0001787;GO:0001787;GO:0001787;GO:0001866;GO:0001866;GO:0001866;GO:0001866;GO:0003677;GO:0003700;GO:0003700;GO:0005634;GO:0005634;GO:0005654;GO:0006355;GO:0006355;GO:0006357;GO:0016604;GO:0016605;GO:0016605;GO:0030154;GO:0043565;GO:0043565;GO:0045087;GO:0045087;GO:0045893;GO:0045893;GO:0045893;GO:0045944;GO:…	K09428	-	K	1AU8I;190ME;KOG3804;13QSC;0UQSV;0DMK0;0A00C;1CWFA;0VAX0	E74 like ETS transcription factor 4 [Source:RGD Symbol;Acc:1560743]	302811	D3ZWM8
ENSRNOG00000057072	34.6917	55.9551	13.4282	0.239982	-2.059	0.000868346	0.0690316	19	11106033	11144641	-	4372	Slc12a3	GO:0005829;GO:0005886;GO:0006811;GO:0006811;GO:0006811;GO:0006814;GO:0006814;GO:0015081;GO:0015293;GO:0015377;GO:0015377;GO:0015698;GO:0016020;GO:0016020;GO:0016020;GO:0016021;GO:0016021;GO:0016021;GO:0016324;GO:0016324;GO:0022857;GO:0022857;GO:0035725;GO:0055085;GO:0055085;GO:0070062;	K14426	-	-	-	solute carrier family 12 member 3 [Source:RGD Symbol;Acc:3686]	54300	P55018;G3V8G0
ENSRNOG00000007646	2077.46	2796.51	1358.41	0.485753	-1.04171	0.000884793	0.0700333	6	106039991	106163302	+	6421	Sipa1l1	GO:0005096;GO:0031532;GO:0043087;GO:0048814;GO:0051056;GO:0005096;GO:0005096;GO:0005096;GO:0005515;GO:0031532;GO:0031532;GO:0043087;GO:0043087;GO:0043547;GO:0048814;GO:0048814;GO:0051056;GO:0051056;GO:0005096;GO:0005096;GO:0031532;GO:0031532;GO:0043087;GO:0043087;GO:0043547;GO:0048814;GO:0048814;GO:0005096;GO:0005096;GO:0005096;GO:0005515;GO:0005886;GO:0015629;GO:0031532;GO:0031532;GO:0043087;GO:…	K17701	-	T	12P2U;0DGA6;09V0S;KOG3686;0V60F;KOG3686	signal-induced proliferation-associated 1 like 1 [Source:RGD Symbol;Acc:708497]	246212	O35412
ENSRNOG00000001714	126.012	179.666	72.3582	0.402736	-1.31209	0.00090061	0.0709766	11	74834050	74968336	+	4284	Atp13a4	GO:0000166;GO:0000166;GO:0000166;GO:0005524;GO:0005524;GO:0005789;GO:0006812;GO:0006812;GO:0006874;GO:0006874;GO:0016020;GO:0016021;GO:0016021;GO:0016021;GO:0016887;GO:0016887;GO:0016887;GO:0016887;GO:0019829;GO:0034220;GO:0046872;GO:0098655;	K14951	EC:7.2.2.-	P	12PU6;0DEPA;0V4B6;09TBZ;KOG0208;1CPD1;1949P;0UFP9;1ARIR	ATPase 13A4 [Source:RGD Symbol;Acc:1306927]	288026	F1M9L4
ENSRNOG00000049150	81.7451	122.242	41.2487	0.337436	-1.56732	0.000944275	0.0738429	20	53775355	53777159	-	1805	AABR07045621.1	GO:0005634;GO:0005839;GO:0005839;GO:0051603;GO:0051603;	-	-	O	KOG0182	-	-	-
ENSRNOG00000027940	356.447	505.373	207.521	0.41063	-1.28409	0.000945092	0.0738429	7	12652415	12663819	+	2910	Plppr3	GO:0006644;GO:0006644;GO:0008195;GO:0016020;GO:0016021;GO:0016311;GO:0042577;	K19582	-	I	0E9CV;13FUG;1DG87;0V3SD;197F7;0WIWW;0B676;1BBFM;0ITB3	phospholipid phosphatase related 3 [Source:RGD Symbol;Acc:727823]	314614	B3DM92
ENSRNOG00000008180	393.034	247.37	538.699	2.17771	1.12281	0.000950894	0.0739787	5	16526058	16642648	+	3430	Lyn	GO:0001782;GO:0001817;GO:0001933;GO:0001934;GO:0002431;GO:0002513;GO:0002576;GO:0002762;GO:0002768;GO:0002774;GO:0002902;GO:0004672;GO:0004672;GO:0004713;GO:0004713;GO:0004713;GO:0004715;GO:0005515;GO:0005524;GO:0005634;GO:0005634;GO:0005737;GO:0005794;GO:0005886;GO:0005886;GO:0006468;GO:0006468;GO:0006974;GO:0007169;GO:0008284;GO:0008285;GO:0008285;GO:0009725;GO:0010976;GO:0017124;GO:0018108;GO:…	K05854	EC:2.7.10.2	T	0UNKM;195ZK;KOG0197;0DJSM;1AWSY;09YCT;12R3M;1CUJR;0V5FJ	LYN proto-oncogene, Src family tyrosine kinase [Source:RGD Symbol;Acc:621017]	81515	Q07014
ENSRNOG00000001113	1720.36	2312.2	1128.51	0.488068	-1.03485	0.000959909	0.0743624	12	14021727	14078134	+	2146	Mmd2	GO:0004672;GO:0004672;GO:0006468;GO:0016020;GO:0016021;GO:0016021;GO:0016021;GO:0019835;GO:0019835;GO:0032880;GO:0032880;GO:0045666;GO:0045666;GO:0045860;GO:0045860;GO:0046579;GO:0046579;GO:0048471;GO:0048471;	K11064	-	V	0A071;1AWFY;KOG4243;131YA;0UH5G;0DMT9;1CWNM;0VB2Z;18UHW	monocyte to macrophage differentiation-associated 2 [Source:RGD Symbol;Acc:1306506]	304301	B1WBN0
ENSRNOG00000006999	373.697	513.044	234.349	0.456782	-1.13042	0.000967548	0.0744669	5	122551405	122642202	-	3710	Wdr78	GO:0002244;GO:0003341;GO:0005515;GO:0005858;GO:0005930;GO:0031514;GO:0070286;	K24723	-	Z	0B6MM;0WJCK;197HV;1DGH8;13GF0;1BBKV;0IU36;0E9NM;0V3YX	WD repeat domain 78 [Source:RGD Symbol;Acc:1311027]	313417	Q4V8G4
ENSRNOG00000037835	122.228	175.733	68.7231	0.391066	-1.35451	0.00096944	0.0744669	9	81644355	81651989	+	2744	Catip	GO:0005634;GO:0005737;GO:0005886;GO:0015629;GO:0030041;GO:0044782;	-	-	S	0VAWG;0IG05;1CWEK;0UQS2;09ZZQ;18ZBI;13JWG;1B0IS;0DMJB	ciliogenesis associated TTC17 interacting protein [Source:RGD Symbol;Acc:1596071]	690437	-
ENSRNOG00000020468	404.042	254.019	554.066	2.1812	1.12512	0.000979871	0.0749519	18	25984638	25997555	-	2677	Stard4	GO:0005737;GO:0005737;GO:0005783;GO:0005783;GO:0005829;GO:0005829;GO:0008289;GO:0008289;GO:0010873;GO:0010873;GO:0010879;GO:0010879;GO:0010879;GO:0015485;GO:0015485;GO:0015485;GO:0015485;GO:0015485;GO:0031410;GO:0031410;GO:0032367;GO:0032367;GO:0032367;GO:0032367;GO:0032367;GO:0034435;GO:0070508;GO:0070508;GO:0070508;GO:0070859;GO:0070859;GO:0120009;GO:0120020;GO:0120020;GO:0120020;	-	-	I	0B449;1975J;1DF2S;0E83N;0IPNZ;0V319;0WGKB;13CJW;1BAXD	StAR-related lipid transfer domain containing 4 [Source:RGD Symbol;Acc:1309475]	291699	D3Z9I9
ENSRNOG00000019141	202.136	64.5888	339.684	5.25918	2.39484	0.000984669	0.0750038	1	252807065	252808380	-	1316	Ch25h	GO:0000254;GO:0001567;GO:0001567;GO:0001567;GO:0001567;GO:0004497;GO:0005506;GO:0005506;GO:0005783;GO:0005789;GO:0005789;GO:0006629;GO:0006694;GO:0008202;GO:0008203;GO:0008203;GO:0008203;GO:0008395;GO:0008395;GO:0008395;GO:0008610;GO:0008610;GO:0016020;GO:0016020;GO:0016021;GO:0016126;GO:0016126;GO:0016491;GO:0016491;GO:0016491;GO:0016491;GO:0035754;GO:0035754;GO:0035754;GO:0046872;GO:0055114;	K10223	EC:1.14.99.38	I	0VDNC;0A2SV;0DQEU;1ASUG;KOG0873;1CZGS;135H8;0UKEC;18VSA	cholesterol 25-hydroxylase [Source:RGD Symbol;Acc:1310575]	309527	Q4QQV7
ENSRNOG00000059683	1222.2	1686.54	757.858	0.449358	-1.15406	0.0009978	0.0756133	10	89999917	90030639	-	2400	Mpp2	GO:0005515;GO:0032590;GO:0043197;GO:0043198;GO:0044325;GO:0060079;GO:0060291;GO:0098685;GO:0098919;GO:0098978;GO:0099031;GO:0005515;	K24048	-	-	-	membrane palmitoylated protein 2 [Source:RGD Symbol;Acc:620014]	85275	D3ZAA9
ENSRNOG00000004048	722.213	980.659	463.768	0.472914	-1.08035	0.00100098	0.0756133	7	132857628	133018584	+	8159	Lrrk2	GO:0000149;GO:0000165;GO:0000186;GO:0000187;GO:0000287;GO:0001933;GO:0001934;GO:0003779;GO:0003924;GO:0004672;GO:0004672;GO:0004672;GO:0004674;GO:0004674;GO:0004708;GO:0005096;GO:0005515;GO:0005524;GO:0005525;GO:0005525;GO:0005737;GO:0005739;GO:0005741;GO:0005743;GO:0005759;GO:0005764;GO:0005768;GO:0005783;GO:0005783;GO:0005794;GO:0005794;GO:0005798;GO:0005802;GO:0005829;GO:0005886;GO:0005886;GO:…	K08844	EC:2.7.11.1	T	KOG0619;12STJ;0V5UM;18X1G;0UMDH;KOG0192;1CTHU;09UV1;1AWVX;0DISN	leucine-rich repeat kinase 2 [Source:RGD Symbol;Acc:1561168]	300160	-
ENSRNOG00000016050	1849.99	1219.04	2480.94	2.03516	1.02514	0.00101223	0.0758692	16	71266248	71319449	-	3389	Fgfr1	GO:0000166;GO:0001837;GO:0004672;GO:0004672;GO:0004713;GO:0004713;GO:0004713;GO:0004713;GO:0004714;GO:0004714;GO:0005007;GO:0005007;GO:0005007;GO:0005524;GO:0005524;GO:0005524;GO:0005634;GO:0005737;GO:0005829;GO:0005886;GO:0005886;GO:0006468;GO:0006468;GO:0008201;GO:0008284;GO:0008284;GO:0008284;GO:0008543;GO:0008543;GO:0008543;GO:0010863;GO:0016020;GO:0016021;GO:0016021;GO:0016021;GO:0016301;GO:…	K04362	EC:2.7.10.1	T	1CWAC;1B422;0DFEA;09U4P;12P10;KOG0200;0V53S;18VM8;0UQBT	Fibroblast growth factor receptor 1 [Source:RGD Symbol;Acc:620713]	79114	Q04589
ENSRNOG00000016678	90.6766	44.8838	136.469	3.0405	1.60431	0.0010127	0.0758692	3	12262822	12292663	+	2127	Angptl2	GO:0001525;GO:0005102;GO:0005615;GO:0062023;	-	-	S;T;E	0DH5X;1B35P;1CRW5;13DWM;0V6W2;0UNZ8;KOG2579;09VXJ;18XZR	angiopoietin-like 2 [Source:RGD Symbol;Acc:620004]	171100	Q9JJ03
ENSRNOG00000033153	84.7129	31.1988	138.227	4.43053	2.14748	0.00102367	0.0763768	5	151823887	151824633	-	747	Sfn	GO:0000079;GO:0001836;GO:0003334;GO:0003674;GO:0005575;GO:0005634;GO:0005737;GO:0005737;GO:0008150;GO:0008630;GO:0010482;GO:0010839;GO:0019901;GO:0030216;GO:0030307;GO:0031424;GO:0042802;GO:0043154;GO:0043588;GO:0045606;GO:0046827;GO:0051219;GO:0051726;GO:0061436;	-	-	O	0UNW5;1CUTR;KOG0841;1AYDP;18TYH;09YJE;0DJZU;13HCJ;0V9H4	stratifin [Source:RGD Symbol;Acc:1304729]	-	-
ENSRNOG00000015030	1073.72	693.514	1453.92	2.09645	1.06795	0.00103855	0.0770085	1	241945841	242083484	-	4672	Tjp2	GO:0005515;GO:0005634;GO:0005886;GO:0005886;GO:0005886;GO:0005911;GO:0005923;GO:0005923;GO:0005923;GO:0005923;GO:0005923;GO:0008022;GO:0010033;GO:0016020;GO:0019904;GO:0030054;GO:0030674;GO:0034109;GO:0044291;GO:0045216;GO:0050839;GO:0050892;GO:0070160;GO:0071847;GO:0090557;GO:0090557;GO:0090559;GO:0098609;GO:0150105;GO:1905605;GO:1905605;GO:1990782;GO:2001205;	K06098	-	T	18TVU;1CZ0V;0URM8;0DF65;12RKK;09TVQ;KOG3580;1B1J1;0V4UW	tight junction protein 2 [Source:RGD Symbol;Acc:619807]	115769	Q3ZB99
ENSRNOG00000005574	27.8295	10.3575	45.3015	4.37379	2.12888	0.0010406	0.0770085	8	32018560	32037531	+	3023	Adamts8	GO:0004222;GO:0004222;GO:0004222;GO:0005576;GO:0006508;GO:0006508;GO:0006508;GO:0008233;GO:0008237;GO:0008237;GO:0008237;GO:0008270;GO:0008270;GO:0030198;GO:0031012;GO:0062023;GO:0062023;	K08623	EC:3.4.24.-	O	1AZJG;0UPW8;0A2K7;18XPC;0VDG8;12TH9;1CZ96;0DQ7U;KOG3538	ADAM metallopeptidase with thrombospondin type 1 motif, 8 [Source:RGD Symbol;Acc:1308511]	300475	-
ENSRNOG00000023561	79.6034	154.91	4.2971	0.0277394	-5.17192	0.00104798	0.0772409	4	158224000	158576978	+	3015	Ano2	GO:0005229;GO:0005886;GO:0006821;GO:0042802;GO:0046983;GO:0097730;GO:0046983;GO:0046983;	K19497	-	U	KOG2514	anoctamin 2 [Source:RGD Symbol;Acc:1591606]	100361584	-
ENSRNOG00000010308	789.299	1162.02	416.581	0.358498	-1.47996	0.00106079	0.0774966	1	131448447	131460473	-	2102	Nr2f2	GO:0005634;GO:0000122;GO:0000122;GO:0000122;GO:0000122;GO:0000978;GO:0001701;GO:0001701;GO:0001764;GO:0001764;GO:0001893;GO:0001893;GO:0001937;GO:0001937;GO:0001945;GO:0001945;GO:0001972;GO:0001972;GO:0001972;GO:0001972;GO:0003084;GO:0003677;GO:0003677;GO:0003677;GO:0003700;GO:0003700;GO:0003700;GO:0003700;GO:0004879;GO:0004879;GO:0004879;GO:0004879;GO:0005515;GO:0005634;GO:0005634;GO:0005634;GO:…	K08548	-	K	09US9;12TH6;0V5RS;KOG3575	nuclear receptor subfamily 2, group F, member 2 [Source:RGD Symbol;Acc:69305]	113984	O09018
ENSRNOG00000050697	499.93	252.64	747.22	2.95765	1.56445	0.00106235	0.0774966	3	172527107	172537877	-	1355	Ctsz	GO:0004180;GO:0004180;GO:0004197;GO:0004197;GO:0005576;GO:0005615;GO:0005615;GO:0005615;GO:0005615;GO:0005764;GO:0005764;GO:0005764;GO:0005783;GO:0006508;GO:0006508;GO:0006508;GO:0006508;GO:0006508;GO:0008233;GO:0008234;GO:0008234;GO:0008234;GO:0009986;GO:0010757;GO:0010757;GO:0010977;GO:0016787;GO:0030426;GO:0031410;GO:0031410;GO:0032091;GO:0032091;GO:0043525;GO:0051603;GO:0060441;GO:0060441;GO:…	K08568	EC:3.4.18.1	O	0V558;1CQ5N;12NZ5;0UHSF;KOG1543;1ATCR;0DFFX;09U69;18TBS	cathepsin Z [Source:RGD Symbol;Acc:708479]	252929	Q9R1T3
ENSRNOG00000039593	59.426	13.1807	105.671	8.01713	3.00309	0.00106738	0.0774966	18	28506934	28516209	-	1320	Ecscr	GO:0005829;GO:0005829;GO:0005886;GO:0005886;GO:0016020;GO:0016021;GO:0016525;GO:0016525;GO:1901800;GO:1901800;GO:2000353;GO:2000353;	-	-	T	0A7Z8;1B6C5;193XM;0UVRV;0VIUI;0DUCF;0J4RP;13X34;1D40I	endothelial cell surface expressed chemotaxis and apoptosis regulator [Source:RGD Symbol;Acc:1594804]	689248	M0RCJ4
ENSRNOG00000010756	421.868	269.677	574.06	2.12869	1.08997	0.00106848	0.0774966	10	56187020	56198449	+	2192	Tp53	GO:0000976;GO:0003677;GO:0003700;GO:0005515;GO:0005634;GO:0006355;GO:0006915;GO:0051262;GO:0000122;GO:0000976;GO:0000977;GO:0000978;GO:0001228;GO:0001756;GO:0001836;GO:0002309;GO:0002326;GO:0002360;GO:0002931;GO:0003677;GO:0003682;GO:0003700;GO:0003700;GO:0005515;GO:0005634;GO:0005634;GO:0005657;GO:0005737;GO:0005739;GO:0005759;GO:0005829;GO:0006302;GO:0006355;GO:0006355;GO:0006357;GO:0006606;GO:…	K04451	-	K;B	1AVUU;0UKCC;0VDT8;0DI05;1915J;0IITK;09X7G;1CSQW;13B4X	tumor protein p53 [Source:RGD Symbol;Acc:3889]	24842	P10361
ENSRNOG00000013850	97.7885	170.337	25.2397	0.148175	-2.75463	0.00107348	0.0775503	5	172364421	172365188	+	592	Hes5	GO:0000122;GO:0001227;GO:0003677;GO:0006355;GO:0007155;GO:0007219;GO:0007219;GO:0007224;GO:0007420;GO:0008284;GO:0014003;GO:0021537;GO:0021781;GO:0021915;GO:0022010;GO:0030513;GO:0031641;GO:0042531;GO:0043010;GO:0045595;GO:0045608;GO:0045665;GO:0045747;GO:0045892;GO:0045893;GO:0045944;GO:0046427;GO:0046983;GO:0048469;GO:0048661;GO:0048708;GO:0048712;GO:0048715;GO:0050678;GO:0050767;GO:0051216;GO:…	K06055	-	K	0IWTV;0DSNF;0VIK5;1B5H7;1961A;1D1YP;13QDQ;0UUSQ;0A7RR	hes family bHLH transcription factor 5 [Source:RGD Symbol;Acc:621340]	79225	Q03062
ENSRNOG00000003745	297.446	18.3548	576.537	31.4107	4.97319	0.00108015	0.0777239	13	109817728	109849632	-	2909	Atf3	GO:0000122;GO:0000122;GO:0000122;GO:0000976;GO:0000976;GO:0000977;GO:0000977;GO:0000977;GO:0000978;GO:0000978;GO:0000978;GO:0000981;GO:0001227;GO:0001227;GO:0001227;GO:0001228;GO:0001228;GO:0001228;GO:0001709;GO:0003677;GO:0003677;GO:0003677;GO:0003677;GO:0003677;GO:0003700;GO:0003700;GO:0003700;GO:0003700;GO:0005634;GO:0005634;GO:0005634;GO:0005634;GO:0005634;GO:0005634;GO:0005634;GO:0005654;GO:…	K09032	-	K	13JH3;0V8DB;1CTI3;1B4PM;0UMDQ;18WR8;KOG1414;09XF5;0DISV	activating transcription factor 3 [Source:RGD Symbol;Acc:2165]	25389	P29596
ENSRNOG00000011668	339.196	170.359	508.032	2.98212	1.57634	0.00109285	0.0783284	17	12261102	12276315	+	1960	Nfil3	GO:0000122;GO:0000977;GO:0000978;GO:0000978;GO:0001227;GO:0001779;GO:0003700;GO:0005634;GO:0006351;GO:0006355;GO:0006366;GO:0006955;GO:0007623;GO:0010628;GO:0045892;GO:0045892;GO:0045893;GO:0071353;	K09059	-	K	1DG2J;13FFK;0E96U;0WIM0;0B5Y4;197DM;1BBCW;0ISXX;0V3NP	nuclear factor, interleukin 3 regulated [Source:RGD Symbol;Acc:620972]	114519	Q6IMZ0
ENSRNOG00000004766	272.724	167.196	378.253	2.26233	1.17781	0.00109833	0.078412	10	11154658	11174861	-	3360	Glis2	GO:0000122;GO:0000122;GO:0000122;GO:0000976;GO:0000976;GO:0000977;GO:0000977;GO:0000978;GO:0000981;GO:0001228;GO:0001228;GO:0001822;GO:0001822;GO:0003677;GO:0003677;GO:0005634;GO:0005634;GO:0005634;GO:0005654;GO:0005737;GO:0005737;GO:0006355;GO:0006355;GO:0006357;GO:0007417;GO:0016607;GO:0016607;GO:0043433;GO:0043433;GO:0045879;GO:0045879;GO:0045892;GO:0045892;GO:0045893;GO:0045893;GO:0045944;GO:…	K09233	-	K	1AYXW;1D0S2;18WP5;0VE01;12THQ;0UPZD;0DRJ5;KOG1721;0A1UT	GLIS family zinc finger 2 [Source:RGD Symbol;Acc:1309177]	302946	D3ZIA9
ENSRNOG00000001618	14.6024	26.0115	3.19335	0.122767	-3.02601	0.00112161	0.0797616	11	38251955	38274217	-	3615	Ripk4	GO:0000166;GO:0002009;GO:0002009;GO:0004672;GO:0004672;GO:0005515;GO:0005524;GO:0005524;GO:0005524;GO:0005737;GO:0005737;GO:0006468;GO:0006468;GO:0051092;GO:0051092;	K08848	EC:2.7.11.1	T;E	0DIBF;18ST1;KOG0504;12Q8D;0UG6G;1ARZH;09X0U;KOG0192;0V7Z0;1CT1Y	receptor-interacting serine-threonine kinase 4 [Source:RGD Symbol;Acc:1311691]	304053	-
ENSRNOG00000024536	27.758	47.3923	8.12361	0.171412	-2.54446	0.00112794	0.0798997	18	61759289	61788863	-	960	AABR07032338.1	GO:0001946;GO:0002020;GO:0005509;GO:0005509;GO:0005518;GO:0005615;GO:0010575;GO:0010954;GO:0031012;GO:1900748;GO:0005509;GO:0005509;	-	-	W;T	KOG1218;09UPA;195KD;0DFZ1;0UT5U;1CQNG;12NVE;0V5NY;1AS9G	collagen and calcium binding EGF domains 1 [Source:NCBI gene;Acc:361341]	-	-
ENSRNOG00000000158	1248.31	812.338	1684.28	2.07337	1.05198	0.00114092	0.0805053	18	40701984	40716686	-	1516	Cdo1	GO:0005506;GO:0005506;GO:0005829;GO:0005829;GO:0006534;GO:0007595;GO:0008198;GO:0008198;GO:0010243;GO:0016491;GO:0016702;GO:0016702;GO:0016702;GO:0017172;GO:0017172;GO:0017172;GO:0017172;GO:0019448;GO:0019448;GO:0033762;GO:0042412;GO:0043200;GO:0045471;GO:0046439;GO:0046872;GO:0051213;GO:0051384;GO:0051591;GO:0055114;	K00456	EC:1.13.11.20	E	0VBPB;18S28;0A0SU;0DNE3;1CXBB;12T2Y;1AXHJ;0UJAU;KOG4064	cysteine dioxygenase type 1 [Source:RGD Symbol;Acc:69262]	81718	P21816
ENSRNOG00000021400	54.6849	87.8887	21.481	0.244412	-2.03261	0.00115301	0.0809507	X	75792931	75795055	+	2125	Magee2	-	-	-	S	0UFU5;13MWW;0V943;KOG4562;194RD;1CZ75;0A3NE;0DQ5W;1ARP0	MAGE family member E2 [Source:RGD Symbol;Acc:1564872]	302392	D4A6M8
ENSRNOG00000008116	3018.49	4055.72	1981.27	0.488511	-1.03354	0.00115612	0.0809507	5	124690214	124765498	+	3079	Plpp3	GO:0001568;GO:0001702;GO:0001933;GO:0005178;GO:0005886;GO:0006644;GO:0006644;GO:0006644;GO:0007155;GO:0008195;GO:0016020;GO:0016021;GO:0016311;GO:0030111;GO:0030111;GO:0030111;GO:0042392;GO:0042577;GO:0042577;GO:0042577;GO:0050731;GO:0050821;GO:0051091;GO:0060020;GO:0060070;GO:0098609;GO:1902068;	K01080	EC:3.1.3.4	I	0E9CW;1DG88;0V3SE;0WIWX;0B677;13FUH;197F8;1BBFN;0ITB4	phospholipid phosphatase 3 [Source:RGD Symbol;Acc:620454]	192270	Q6IMX4
ENSRNOG00000013949	855.405	1153	557.81	0.48379	-1.04755	0.0011817	0.0821815	1	141866283	141893705	-	1911	Idh2	GO:0000287;GO:0000287;GO:0004450;GO:0004450;GO:0004450;GO:0004450;GO:0006097;GO:0006099;GO:0006102;GO:0006102;GO:0016491;GO:0016616;GO:0016616;GO:0046872;GO:0051287;GO:0051287;GO:0055114;GO:0000287;GO:0004448;GO:0004450;GO:0004450;GO:0004450;GO:0005739;GO:0005777;GO:0005829;GO:0006102;GO:0016616;GO:0051287;GO:0055114;	K00031	EC:1.1.1.42	C	12N84;1CTA8;0DIJK;09THE;0UM46;1AZ8V;0V4GD;18S5S;KOG1526	isocitrate dehydrogenase (NADP(+)) 2 [Source:RGD Symbol;Acc:1597139]	361596	P56574
ENSRNOG00000008816	775.613	260.758	1290.47	4.94891	2.30711	0.00118273	0.0821815	4	78694447	78715683	+	2306	Gpnmb	GO:0001818;GO:0001934;GO:0001934;GO:0005178;GO:0005887;GO:0007155;GO:0007165;GO:0007267;GO:0008201;GO:0008201;GO:0016021;GO:0030335;GO:0031410;GO:0031954;GO:0032720;GO:0034103;GO:0034103;GO:0042130;GO:0045545;GO:0048018;GO:0050868;GO:0070374;GO:1901215;GO:2000134;	K20732	-	S;W	0VESI;0A3XQ;0UHCK;0IE9P;0DPKX;1AYZQ;12T0E;1CYK0;18UDN	glycoprotein nmb [Source:RGD Symbol;Acc:71008]	113955	Q9QZF6
ENSRNOG00000033697	95.1605	52.4327	137.888	2.62982	1.39496	0.00119701	0.0828259	8	2635851	2651652	+	1223	Casp4	GO:0004197;GO:0006508;GO:0008234;GO:0042981;	K04394	-	D	1ARQT;0VAES;1CVVC;12S0S;0UFW8;0DM0G;18SGZ;09WHC;KOG3573	caspase 4 [Source:RGD Symbol;Acc:621757]	114555	Q3MHS1
ENSRNOG00000009079	879.266	1187.93	570.603	0.480334	-1.05789	0.0012011	0.0828259	6	51265515	51356383	-	3268	Prkar2b	GO:0001932;GO:0004862;GO:0005737;GO:0005737;GO:0005813;GO:0005886;GO:0005952;GO:0005952;GO:0006631;GO:0007612;GO:0008603;GO:0008603;GO:0008603;GO:0019901;GO:0031625;GO:0034236;GO:0043197;GO:0043198;GO:0050804;GO:0097546;GO:0098794;GO:0098978;GO:2000480;GO:0000166;GO:0001932;GO:0001932;GO:0005952;GO:0005952;GO:0008603;GO:0008603;GO:0016301;GO:0016310;GO:0030552;GO:2000479;GO:0000166;GO:0001932;GO:…	K04739	-	T	09ZXF;12RDS;0VCXB;KOG1113	protein kinase cAMP-dependent type II regulatory subunit beta [Source:RGD Symbol;Acc:3394]	24679	P12369
ENSRNOG00000014819	2134.23	3251.38	1017.09	0.312817	-1.67661	0.00121104	0.0831964	10	88257976	88266210	-	3609	Hap1	GO:0005730;GO:0005739;GO:0005769;GO:0005776;GO:0005813;GO:0005814;GO:0005829;GO:0008089;GO:0008104;GO:0016234;GO:0017157;GO:0021549;GO:0021979;GO:0022008;GO:0031410;GO:0031587;GO:0047496;GO:0048011;GO:0050769;GO:1902513;GO:1902857;GO:1904115;	K04647	-	Z;U	1B3SA;0DSNH;KOG4360;19167;0A590;14213;0V8YZ;1D1YS;0UUJC	huntingtin-associated protein 1 [Source:RGD Symbol;Acc:68327]	29430	P54256
ENSRNOG00000024127	175.612	245.425	105.798	0.431083	-1.21396	0.00122781	0.0840314	11	74984613	75124249	+	4464	Atp13a5	GO:0000166;GO:0006812;GO:0016021;GO:0016887;	K14951	EC:7.2.2.-	P	1B3TI;19278;12PU6;0DEPA;0V4B6;09TBZ;KOG0208;1CPD1;0UFP9	ATPase 13A5 [Source:RGD Symbol;Acc:1306792]	303856	F1MA70
ENSRNOG00000021714	42.674	66.3311	19.0169	0.286696	-1.8024	0.00124565	0.0849331	19	53743383	53754602	-	879	Fam92b	GO:0005814;GO:0005856;GO:0030030;GO:0036064;GO:0036064;	K23868	-	S	0IFRR;13HP7;0DGZ6;1CRPC;18Y8N;09VQJ;0UIYK;0V6PK;1AXCK	family with sequence similarity 92, member B [Source:RGD Symbol;Acc:1560673]	361423	D3ZCB9
ENSRNOG00000006532	5156.64	3439.52	6873.76	1.99847	0.998894	0.00125596	0.0853163	10	104573664	104575890	-	1655	H3f3a	GO:0000228;GO:0000781;GO:0000786;GO:0000786;GO:0000786;GO:0000786;GO:0000978;GO:0000979;GO:0001649;GO:0001740;GO:0003674;GO:0003677;GO:0003677;GO:0005575;GO:0005634;GO:0005634;GO:0006334;GO:0006336;GO:0007283;GO:0007338;GO:0008150;GO:0008283;GO:0030307;GO:0031492;GO:0031508;GO:0031509;GO:0032991;GO:0035264;GO:0042692;GO:0046982;GO:0046982;GO:0048477;GO:1902340;	K11253	-	B	KOG1745	H3 histone family member 3A [Source:RGD Symbol;Acc:2319910]	117056	P84245;B0BMY8
ENSRNOG00000009140	1119.81	1505.29	734.337	0.487838	-1.03553	0.00127485	0.086124	3	79713567	79718025	+	1365	C1qtnf4	GO:0005515;GO:0005576;GO:0005615;GO:0005615;GO:0032755;GO:0032755;GO:0032760;GO:0032760;GO:0070105;GO:0070105;GO:1901224;GO:1901224;	-	-	S	0VCJM;1AWVP;0A1PY;0UMDC;0IFAJ;18XT8;0DPC2;12U4U;1CY9W	C1q and TNF related 4 [Source:RGD Symbol;Acc:1311006]	-	-
ENSRNOG00000010989	3283.64	2201.57	4365.71	1.983	0.987682	0.00127874	0.086124	15	106257650	106292112	+	3328	Ipo5	GO:0005515;GO:0005634;GO:0005737;GO:0006606;GO:0006607;GO:0006610;GO:0006886;GO:0042307;GO:0061608;GO:0071230;GO:0005515;GO:0005634;GO:0005634;GO:0005634;GO:0005737;GO:0005737;GO:0005737;GO:0006606;GO:0006606;GO:0006606;GO:0006607;GO:0006610;GO:0006886;GO:0006886;GO:0008139;GO:0015031;GO:0031267;GO:0042307;GO:0061608;GO:0061608;GO:0071230;	K20222	-	Y;U	KOG2171;12RET;1CU95;0DJGN;0UGEA;1AS6T;09Y3R;0V913;19571	importin 5 [Source:RGD Symbol;Acc:1308715]	306182	D4A781
ENSRNOG00000012843	143.014	32.4392	253.588	7.81732	2.96667	0.00128204	0.086124	6	136682126	136701628	+	2632	Aspg	GO:0004067;GO:0004067;GO:0004067;GO:0005515;GO:0006520;GO:0006520;	K13278	-	E	1B1B9;KOG0503;12RED;0DNMW;192F6;0UHG2;1CXJ7;09YS9;0V9Q4	asparaginase [Source:RGD Symbol;Acc:708388]	246266	O88202
ENSRNOG00000020478	394.086	537.26	250.911	0.46702	-1.09844	0.00128757	0.0861771	18	25749098	25965957	+	1920	Camk4	GO:0001650;GO:0004672;GO:0004683;GO:0005524;GO:0005654;GO:0006468;GO:0007616;GO:0043011;GO:0045893;	K05869	EC:2.7.11.17	T;K	0UQ59;0DM29;0V97E;KOG0032;1AYX5;190X4;09ZJ3;1CVX9;12S2G	calcium/calmodulin-dependent protein kinase IV [Source:RGD Symbol;Acc:2264]	25050	P13234
ENSRNOG00000059322	175.935	246.222	105.648	0.429078	-1.22069	0.00132149	0.0881233	12	546760	576746	-	2127	N4bp2l1	-	-	-	-	-	NEDD4 binding protein 2-like 1 [Source:RGD Symbol;Acc:1595713]	-	-
ENSRNOG00000002595	883.654	1190.53	576.781	0.484476	-1.0455	0.00133335	0.0885902	13	39434217	39643361	-	2007	Dpp10	GO:0006508;GO:0008076;GO:0008236;GO:0016020;GO:0044325;GO:1903078;	K23014	-	O	0DJEJ;KOG2100;1CU70;09URM;0V52H;12P87	dipeptidyl peptidase like 10 [Source:RGD Symbol;Acc:1306427]	363972	Q6Q629
ENSRNOG00000062295	8.96316	0.665805	17.2605	25.9243	4.69623	0.00135066	0.0889325	7	143874734	143878705	+	2650	Gm9918	-	-	-	-	-	predicted gene 9918 [Source:MGI Symbol;Acc:MGI:3646315]	-	-
ENSRNOG00000058047	91.6144	49.8178	133.411	2.67798	1.42114	0.00135095	0.0889325	1	24854907	24858316	-	576	AABR07000733.1	-	-	-	-	-	-	-	-
ENSRNOG00000007545	498.293	207.489	789.096	3.80307	1.92717	0.00135316	0.0889325	7	18627808	18634079	-	1888	Angptl4	GO:0001525;GO:0001525;GO:0001525;GO:0001666;GO:0004857;GO:0004857;GO:0004857;GO:0005102;GO:0005576;GO:0005576;GO:0005576;GO:0005576;GO:0005615;GO:0005615;GO:0005615;GO:0005615;GO:0005615;GO:0005615;GO:0006629;GO:0019216;GO:0042802;GO:0042802;GO:0043066;GO:0043066;GO:0043066;GO:0043066;GO:0043066;GO:0043086;GO:0043335;GO:0043335;GO:0051005;GO:0051005;GO:0051005;GO:0062023;GO:0070328;GO:0070328;GO:…	K08767	-	S;W;E	18W2C;0DHPK;0VDSJ;1CZMH;1AZPH;0UI82;KOG2579;0A2XA;13K55	angiopoietin-like 4 [Source:RGD Symbol;Acc:735058]	362850	Q6TMA8
ENSRNOG00000005214	183.263	82.4448	284.081	3.44571	1.7848	0.00136387	0.0893138	14	100151210	100217913	-	2155	Plek	GO:0035556;GO:0035556;GO:0002244;GO:0002576;GO:0005080;GO:0005737;GO:0006904;GO:0007229;GO:0010572;GO:0010920;GO:0010925;GO:0030030;GO:0030836;GO:0030836;GO:0030845;GO:0030866;GO:0031529;GO:0031532;GO:0032233;GO:0032587;GO:0033625;GO:0035556;GO:0042803;GO:0043325;GO:0045744;GO:0046488;GO:0060305;GO:0070493;GO:0070493;GO:0070527;GO:0070528;GO:0070560;	K19993	-	T	0IFJ7;09XEV;13HUJ;1CTS2;1AS31;18SWX;0V8KH;0DJ0K;0UG9Y	pleckstrin [Source:RGD Symbol;Acc:1308269]	364206	Q4KM33
ENSRNOG00000032546	1032.11	682.899	1381.32	2.02274	1.01631	0.00138129	0.0899029	7	11786105	11824742	-	6015	Dot1l	GO:0000077;GO:0000077;GO:0000781;GO:0003674;GO:0005575;GO:0005634;GO:0005634;GO:0005634;GO:0005634;GO:0005634;GO:0005634;GO:0005654;GO:0006281;GO:0006281;GO:0006325;GO:0006342;GO:0006342;GO:0006348;GO:0006348;GO:0008150;GO:0008168;GO:0008284;GO:0008284;GO:0010467;GO:0010467;GO:0016740;GO:0018024;GO:0018024;GO:0018024;GO:0018024;GO:0018024;GO:0031151;GO:0031151;GO:0031151;GO:0031151;GO:0032259;GO:…	K11427	EC:2.1.1.360	D;K;B	0URCG;1B20R;0DPVS;18UY6;0A2I0;KOG3924;0VDE2;1CYVA;13I17	DOT1 like histone lysine methyltransferase [Source:RGD Symbol;Acc:1306644]	362831	D3ZCP0
ENSRNOG00000012481	48.4082	22.5653	74.251	3.29049	1.7183	0.00138274	0.0899029	2	207262934	207268609	+	2144	Ppm1j	GO:0004722;GO:0004722;GO:0006470;GO:0006470;GO:0016791;	K17504	EC:3.1.3.16	T	0USGN;09XQ6;0DJ21;0V8CS;KOG1323;1CTTM;13HDW;18TWW;1AWC4	protein phosphatase, Mg2+/Mn2+ dependent, 1J [Source:RGD Symbol;Acc:1359104]	295341	Q641Y6
ENSRNOG00000050251	15.2867	0.299434	30.274	101.104	6.6597	0.00140867	0.0912629	3	114772603	114776155	+	1151	MGC105649	GO:0005634;GO:0009617;	-	-	S	1B6S5;13VC0;0DVHR;1D4UC;0VK77;0UW9E;0J1F7;19410;0A9AE	hypothetical LOC302884 [Source:RGD Symbol;Acc:1359583]	302884	Q5RK28
ENSRNOG00000008676	419.578	122.315	716.842	5.86064	2.55106	0.00142344	0.0918924	4	169147243	169181966	+	2805	Emp1	GO:0005886;GO:0008219;GO:0016020;GO:0016021;GO:0032060;GO:0016020;GO:0016021;	-	-	U	1D35G;0VHND;192Z7;0UV06;0DTTB;13PXT;0IW7W;1B5E1;0A6UE	epithelial membrane protein 1 [Source:RGD Symbol;Acc:2552]	25314	P54848
ENSRNOG00000048478	68.7713	30.3209	107.222	3.53622	1.82221	0.00143714	0.0921514	9	84689150	84690338	+	629	Kcne4	GO:0003674;GO:0005249;GO:0005249;GO:0005251;GO:0006811;GO:0006811;GO:0008076;GO:0008150;GO:0015459;GO:0016020;GO:0016020;GO:0016020;GO:0016021;GO:0016324;GO:0044325;GO:0044325;GO:0044325;GO:0060307;GO:0086005;GO:0086011;GO:0086091;GO:0097623;GO:0098915;GO:1902260;GO:1902282;	K04898	-	P	0DSUW;18TV3;0A1WE;0UTWB;1CYPP;0IWSX;0VG7B;1B2H0;13QQA	potassium voltage-gated channel subfamily E regulatory subunit 4 [Source:RGD Symbol;Acc:1302957]	367302	Q71FD8
ENSRNOG00000005958	1716.78	1144.36	2289.21	2.00042	1.0003	0.00144262	0.0921514	3	138055240	138116664	-	4668	Rrbp1	GO:0005515;GO:0005783;GO:0015031;GO:0015031;GO:0016020;GO:0016021;GO:0030176;GO:0030176;GO:0030176;	K14000	-	T;U	0IFNK;0UNK0;1ATNB;0DJSA;09YCF;12R31;0V99X;1CUJC	ribosome binding protein 1 [Source:RGD Symbol;Acc:1306536]	311483	F1M853
ENSRNOG00000038483	27.8557	9.95027	45.7612	4.599	2.20132	0.00144263	0.0921514	15	51433859	51463718	+	1817	AABR07018323.1	GO:0005515;GO:0007165;GO:0007165;GO:0016020;GO:0016021;GO:0005515;GO:0005886;GO:0006915;GO:0007165;GO:0007165;GO:0009986;GO:0016020;GO:0016021;GO:0036462;GO:0043065;	-	-	T	1D113;193IZ;0VHIU;1B5KK;13SSI;0DRSY;0UPZY;0IZX0;0A701	-	-	-
ENSRNOG00000047943	11.9516	2.17047	21.7326	10.0129	3.32378	0.00146583	0.0933059	1	90957133	90962466	-	1442	LOC108348106	GO:0016491;GO:0016491;GO:0055114;	-	-	S;E	1CVE2;1B3KZ;KOG3200;0DPMJ;0UTIS;0VCUW;12U7Y;19289;0A1ZN	alpha-ketoglutarate-dependent dioxygenase alkB homolog 6 [Source:RGD Symbol;Acc:11413490]	-	-
ENSRNOG00000014149	295.687	404.308	187.067	0.462686	-1.1119	0.00148005	0.0938501	16	24779477	24788740	-	2905	Npy1r	GO:0003151;GO:0004930;GO:0004930;GO:0004930;GO:0004983;GO:0004983;GO:0005886;GO:0007165;GO:0007186;GO:0007186;GO:0007186;GO:0007218;GO:0016020;GO:0016021;GO:0016021;GO:0016021;GO:0004930;GO:0004930;GO:0004930;GO:0004983;GO:0004983;GO:0005886;GO:0007165;GO:0007186;GO:0007186;GO:0007186;GO:0007218;GO:0016020;GO:0016021;GO:0016021;GO:0016021;	K04204	-	W;T	KOG3656;0DGSM;09VHZ;0V6H8;13MWP;1B1XD;18VJ5;0UHCI;1CRGR	neuropeptide Y receptor Y1 [Source:RGD Symbol;Acc:3198]	29358	G3V7T1
ENSRNOG00000015441	528.803	230.102	827.504	3.59624	1.84649	0.00149144	0.0938501	1	196942364	196967220	+	3561	Il4r	GO:0002532;GO:0002532;GO:0002639;GO:0003674;GO:0004896;GO:0004896;GO:0005515;GO:0005576;GO:0005615;GO:0005886;GO:0006954;GO:0006955;GO:0016020;GO:0016020;GO:0016020;GO:0016021;GO:0016021;GO:0016021;GO:0016064;GO:0019221;GO:0030728;GO:0032722;GO:0042127;GO:0042832;GO:0043032;GO:0043235;GO:0043306;GO:0043627;GO:0044877;GO:0045626;GO:0045630;GO:0120162;GO:0120162;GO:1901741;GO:1990834;GO:0002532;GO:…	K05071	-	W;T	0VAMV;1CW4H;12S81;0UQEC;0IGBQ;09ZRD;0DG63;1ASCG;18VWB	interleukin 4 receptor [Source:RGD Symbol;Acc:2899]	25084	Q63257
ENSRNOG00000010952	671.764	906.599	436.929	0.481942	-1.05307	0.00149476	0.0938501	4	147756553	147826997	+	4392	Ift122	GO:0001843;GO:0005515;GO:0005737;GO:0005929;GO:0005929;GO:0005929;GO:0007227;GO:0009953;GO:0010172;GO:0021914;GO:0030991;GO:0030991;GO:0030991;GO:0032391;GO:0035050;GO:0035115;GO:0035720;GO:0035721;GO:0035721;GO:0036064;GO:0036064;GO:0042073;GO:0042073;GO:0042733;GO:0042995;GO:0045879;GO:0048593;GO:0048596;GO:0050680;GO:0060173;GO:0060271;GO:0060271;GO:0060271;GO:0060271;GO:0060830;GO:0060831;GO:…	K19656	-	S	1B1S5;1CWYW;12RQK;0DKZ0;0V4HD;KOG1538;0URKS;09TIE	intraflagellar transport 122 [Source:RGD Symbol;Acc:1311302]	312651	Q5PPJ1
ENSRNOG00000008709	4641.41	6167.69	3115.13	0.505073	-0.985438	0.001495	0.0938501	8	33239139	33392305	+	9935	Arhgap32	GO:0001650;GO:0005096;GO:0005515;GO:0005654;GO:0005794;GO:0005938;GO:0005938;GO:0005938;GO:0007165;GO:0007165;GO:0007264;GO:0014069;GO:0014069;GO:0015629;GO:0015629;GO:0015629;GO:0035091;GO:0035091;GO:0043547;GO:1901981;GO:1901981;	K20647	-	T	KOG1449;12QN7;0V8JH;1CU4A;1B2T6;0UT4M;18ZUD;0DJC3;09XZ2	Rho GTPase activating protein 32 [Source:RGD Symbol;Acc:1305267]	315530	-
ENSRNOG00000029528	700.477	938.085	462.868	0.493418	-1.01912	0.00150314	0.0939004	20	10361988	10386751	-	2655	Cbs	GO:0001958;GO:0001974;GO:0004122;GO:0004122;GO:0004122;GO:0004122;GO:0004122;GO:0005634;GO:0005634;GO:0005737;GO:0005737;GO:0005737;GO:0005737;GO:0005737;GO:0005829;GO:0006535;GO:0006535;GO:0006535;GO:0006563;GO:0006563;GO:0006565;GO:0006801;GO:0008652;GO:0010749;GO:0016829;GO:0019343;GO:0019343;GO:0019344;GO:0019344;GO:0019346;GO:0019346;GO:0019448;GO:0019825;GO:0019899;GO:0020037;GO:0020037;GO:…	K01697	EC:4.2.1.22	E	0VA5B;1CX03;18Z1P;KOG1252;0UHT6;1ARA3;0DN8N;12RSH;0A0M7	cystathionine beta synthase [Source:RGD Symbol;Acc:2287]	24250	P32232
ENSRNOG00000010319	708.233	386.414	1030.05	2.66567	1.4145	0.00150612	0.0939004	15	57221292	57277811	+	3637	Lcp1	GO:0001725;GO:0001726;GO:0001891;GO:0002102;GO:0002286;GO:0003674;GO:0003779;GO:0005178;GO:0005509;GO:0005509;GO:0005515;GO:0005575;GO:0005737;GO:0005737;GO:0005884;GO:0005884;GO:0005925;GO:0010737;GO:0015629;GO:0016477;GO:0022617;GO:0030175;GO:0031100;GO:0032432;GO:0032432;GO:0033157;GO:0042802;GO:0048471;GO:0051015;GO:0051015;GO:0051015;GO:0051015;GO:0051017;GO:0051017;GO:0051017;GO:0051017;GO:…	K17276	-	Z	0V55N;12U9H;1CRV4;09VWS;KOG0046;1AX42;0DH4W;18VE7;0UMME	lymphocyte cytosolic protein 1 [Source:RGD Symbol;Acc:1308288]	306071	Q5XI38
ENSRNOG00000003707	1679.13	2240.24	1118.02	0.499064	-1.0027	0.00151951	0.0941214	X	71299662	71313542	-	5740	Zmym3	GO:0005654;GO:0007010;GO:0007010;GO:0008270;GO:0008270;GO:0022604;GO:0022604;	K24675	-	S	0DEUU;0IE8I;12QSK;1B1SR;192A9;0UH5N;0V4H1;1CPIJ;09TI3	zinc finger MYM-type containing 3 [Source:RGD Symbol;Acc:1564967]	317260	-
ENSRNOG00000056216	121.525	64.8026	178.247	2.75062	1.45975	0.00152001	0.0941214	1	277190964	277242774	+	2431	Casp7	GO:0004190;GO:0004190;GO:0004197;GO:0004197;GO:0004197;GO:0004197;GO:0004197;GO:0005634;GO:0005634;GO:0005737;GO:0005737;GO:0005829;GO:0005829;GO:0006508;GO:0006508;GO:0006508;GO:0006508;GO:0006508;GO:0006915;GO:0006915;GO:0006915;GO:0006915;GO:0006915;GO:0007507;GO:0007507;GO:0007568;GO:0008233;GO:0008233;GO:0008233;GO:0008234;GO:0008234;GO:0008234;GO:0008234;GO:0009411;GO:0009411;GO:0016485;GO:…	K04397	EC:3.4.22.60	-	-	caspase 7 [Source:RGD Symbol;Acc:620944]	64026	O88550
ENSRNOG00000002361	297.366	407.039	187.694	0.461119	-1.11679	0.00152718	0.0942452	14	12218553	12315229	+	4557	Prkg2	GO:0004672;GO:0004674;GO:0004692;GO:0005524;GO:0006468;GO:0006468;	K19477	EC:2.7.11.12	T	KOG0616;09V14;0V60R;191EH;1CV9T;0DGAH;1B2N1;0UPDE;12QSF	protein kinase cGMP-dependent 2 [Source:RGD Symbol;Acc:3401]	25523	Q64595
ENSRNOG00000000920	79.7809	115.498	44.0639	0.381512	-1.3902	0.00154374	0.0947492	12	30450316	30464352	+	1534	Phkg1	GO:0004672;GO:0004689;GO:0005516;GO:0005524;GO:0005964;GO:0005978;GO:0006468;	K00871	EC:2.7.11.19	G	1CUPG;1B385;12Q77;KOG0599;09YFU;0DJW5;191KN;0URRA;0V9DN	phosphorylase kinase catalytic subunit gamma 1 [Source:RGD Symbol;Acc:3325]	29353	P13286
ENSRNOG00000021104	115.7	45.9921	185.408	4.0313	2.01125	0.00154576	0.0947492	1	101900733	101903910	-	729	Emp3	GO:0005886;GO:0008219;GO:0016020;GO:0016021;GO:0032060;	-	-	U	13RZU;0DRMF;0VEWW;0IY40;190TR;0A421;1D0UJ;1B1ZG;0URXX	epithelial membrane protein 3 [Source:RGD Symbol;Acc:621094]	81505	Q9QYW5
ENSRNOG00000023627	74.0373	109.87	38.2044	0.347723	-1.52399	0.00156173	0.0954072	5	172825072	172858053	+	2355	Cfap74	-	-	-	S	0VZH9;12QMP;0AMPE;19480;0IDXX;1AX51;0E3A7;0UI15;1DAHW	cilia and flagella associated protein 74 [Source:RGD Symbol;Acc:2324110]	100362748	-
ENSRNOG00000009533	189.198	262.794	115.602	0.439896	-1.18476	0.00157262	0.0956168	2	260997497	261032821	+	1566	Erich3	-	-	-	S	1CTDC;0UM7R;0DINH;18XR9;1AWTP;0V89F;0IE95;13HJ6;09XB1	glutamate-rich 3 [Source:RGD Symbol;Acc:1593279]	-	-
ENSRNOG00000047939	11.0617	20.4434	1.67988	0.0821724	-3.6052	0.00157567	0.0956168	8	49544858	49547418	+	255	Smim35	GO:0016020;GO:0016021;	-	-	S	1B8DS;196I1;0AIHB;0KFE9;0UYZ4;0E1EC;1D9FT;0VVYQ;12Z0N	small integral membrane protein 35 [Source:RGD Symbol;Acc:7587328]	102546809	-
ENSRNOG00000020164	237.175	146.686	327.665	2.23379	1.15949	0.00159115	0.096001	1	215515764	215536980	-	705	Ifitm10	GO:0016021;GO:0016021;	-	-	S	0DGBP;0V61Z;0UI25;194KZ;09V2C;1ATMY;0J92W;13WPD;1CR15	interferon induced transmembrane protein 10 [Source:RGD Symbol;Acc:1563319]	-	-
ENSRNOG00000011406	85.3137	1.9119	168.715	88.245	6.46344	0.00159255	0.096001	10	70884531	70886355	+	631	Ccl4	GO:0005125;GO:0005576;GO:0005576;GO:0005576;GO:0005615;GO:0005615;GO:0006935;GO:0006955;GO:0006955;GO:0007165;GO:0008009;GO:0008009;GO:0035690;GO:0060326;	K12964	-	W;T	13X8V;1B6HY;0UVZK;196B4;1D4A0;0DUZ9;0J4I9;0A8E2;0VJA1	C-C motif chemokine ligand 4 [Source:RGD Symbol;Acc:620441]	116637	P50230
ENSRNOG00000007647	59.9407	93.8921	25.9894	0.276801	-1.85308	0.00161357	0.0969475	5	13744658	13760305	-	2582	Oprk1	GO:0004930;GO:0004985;GO:0004985;GO:0005654;GO:0005829;GO:0005886;GO:0005887;GO:0006955;GO:0007186;GO:0016021;GO:0016021;GO:0031635;GO:0038003;GO:0038048;GO:0038048;GO:0051607;	K04214	-	T	KOG3656;09V4N;1AUUH;1CR3A;0DGDS;0UJBF;18XT9;0V64A;12RBB	opioid receptor, kappa 1 [Source:RGD Symbol;Acc:69426]	29335	P34975
ENSRNOG00000020925	270.164	171.767	368.561	2.1457	1.10145	0.00163886	0.098143	1	226996237	227002139	-	1347	Ccdc86	GO:0005634;GO:0005634;GO:0005634;GO:0005654;GO:0005694;GO:0005730;GO:0005730;	K14822	-	S	0VFSG;13W7I;1AS7H;KOG4538;0DSCT;1D1N8;0UFYK;18UHE;0A41T	coiled-coil domain containing 86 [Source:RGD Symbol;Acc:1359280]	293738	Q5XIB5
ENSRNOG00000004757	396.497	554.746	238.247	0.42947	-1.21937	0.00164838	0.0983895	8	132344710	132345708	-	999	Tmem158	-	-	-	U	0VGI9;0IXR9;1D1HV;13RTW;0UU9M;0A5P6;1B7MT;0DMFA	transmembrane protein 158 [Source:RGD Symbol;Acc:708473]	117582	Q91XV7
ENSRNOG00000007152	1330.04	886.9	1773.18	1.9993	0.999495	0.00166912	0.0990285	4	140703619	140709319	+	2376	Bhlhe40	GO:0000122;GO:0000978;GO:0000981;GO:0000981;GO:0001102;GO:0001227;GO:0001227;GO:0003677;GO:0003677;GO:0003677;GO:0005634;GO:0005634;GO:0006355;GO:0006355;GO:0007623;GO:0007623;GO:0009416;GO:0016604;GO:0019904;GO:0032922;GO:0032922;GO:0042752;GO:0042803;GO:0043153;GO:0043425;GO:0043426;GO:0043433;GO:0045892;GO:0045892;GO:0046982;GO:0046983;GO:0046983;GO:0070888;GO:0070888;GO:1990837;	K03729	-	K	0UHQ1;0DR7U;1ATAH;18XNS;0VEG1;KOG4304;13K2M;0A3M1;1D0D9	basic helix-loop-helix family, member e40 [Source:RGD Symbol;Acc:68439]	79431	O35780;Q76JQ4
ENSRNOG00000005048	135.523	239.617	31.4299	0.131167	-2.93052	0.00167082	0.0990285	7	83113672	83153519	+	3373	Trhr	GO:0004930;GO:0004930;GO:0004930;GO:0004997;GO:0004997;GO:0005886;GO:0007165;GO:0007186;GO:0007186;GO:0007186;GO:0016020;GO:0016021;GO:0016021;GO:0016021;	K04282	-	T	KOG3656;0UGJJ;1ASBD;12S0J;09U1D;0V506;0DFB2;18WZP;1CQ0V	thyrotropin releasing hormone receptor [Source:RGD Symbol;Acc:3904]	25570	Q01717
ENSRNOG00000039494	132.755	203.051	62.4591	0.307603	-1.70086	0.00167541	0.0990285	4	50152452	50200328	-	2781	Aass	GO:0003824;GO:0005739;GO:0008152;GO:0016491;GO:0016491;GO:0019477;GO:0033512;GO:0043231;GO:0047130;GO:0047130;GO:0047131;GO:0047131;GO:0047131;GO:0055114;	K14157	-	C;E	0UKB3;KOG0172;14F6N;1CSPJ;0V7MW;18ZF5;09WPB;0DHYX;1AWCP	aminoadipate-semialdehyde synthase [Source:RGD Symbol;Acc:1310811]	296925	A2VCW9
ENSRNOG00000058308	296.26	408.262	184.259	0.451325	-1.14776	0.00169378	0.0997903	10	68248655	68517564	-	1692	Asic2	GO:0003026;GO:0005216;GO:0005261;GO:0005272;GO:0005272;GO:0005272;GO:0005887;GO:0006812;GO:0006814;GO:0006814;GO:0006814;GO:0006814;GO:0007602;GO:0007605;GO:0009612;GO:0010447;GO:0015280;GO:0015280;GO:0015280;GO:0016020;GO:0016020;GO:0016020;GO:0016021;GO:0016021;GO:0016021;GO:0016021;GO:0019229;GO:0022839;GO:0034220;GO:0034765;GO:0035418;GO:0035725;GO:0042391;GO:0043005;GO:0043025;GO:0043066;GO:…	K04828	-	-	-	acid sensing ion channel subunit 2 [Source:RGD Symbol;Acc:2017]	25364	Q62962
ENSRNOG00000028768	25.8751	8.32089	43.4293	5.21931	2.38386	0.00171049	0.10045	2	248249468	248263168	+	2626	Gbp4	GO:0003924;GO:0003924;GO:0003924;GO:0005525;GO:0005525;GO:0005525;GO:0005634;GO:0005829;GO:0005829;GO:0020005;GO:0031410;GO:0031410;GO:0031410;GO:0035458;GO:0035458;GO:0042803;GO:0042832;GO:0042832;GO:0042832;GO:0044406;GO:0044406;GO:0048471;GO:0050830;GO:0050830;GO:0050830;GO:0071346;GO:0071346;GO:0071346;	K20899	-	S;O;T;D;C;K	191WI;0V9BC;134KU;09XSJ;1AYRV;KOG2037;1CUKV;0UNNF;0DJTQ	guanylate binding protein 4 [Source:RGD Symbol;Acc:1310579]	310917	D3ZQL3
ENSRNOG00000003251	655.766	901.243	410.289	0.455248	-1.13528	0.00172207	0.100805	13	60435946	60444957	+	4463	B3galt2	GO:0000139;GO:0005794;GO:0005794;GO:0006486;GO:0006486;GO:0006486;GO:0006682;GO:0006682;GO:0008375;GO:0008376;GO:0008499;GO:0008499;GO:0008499;GO:0008532;GO:0009312;GO:0009312;GO:0016020;GO:0016020;GO:0016020;GO:0016021;GO:0016757;GO:0016758;GO:0030311;	K07820	EC:2.4.1.86	G	1CRZT;1921D;09TSJ;KOG2287;0UK0V;1ARKG;12TG6;0V6Z1;0DH9U	Beta-1,3-galactosyltransferase 2 [Source:RGD Symbol;Acc:1586615]	686081	D4A950
ENSRNOG00000049614	184.733	254.112	115.354	0.453951	-1.13939	0.00173075	0.100988	17	72036588	72046381	-	1407	AABR07028488.1	GO:0004867;GO:0004867;GO:0010951;GO:0030212;GO:0030212;	-	-	-	-	-	-	-
ENSRNOG00000015049	114.559	195.692	33.4267	0.170813	-2.54951	0.00174253	0.101351	8	128169191	128266639	-	8537	Scn5a	GO:0001518;GO:0001518;GO:0002027;GO:0005216;GO:0005248;GO:0005248;GO:0005261;GO:0005516;GO:0005654;GO:0005730;GO:0005783;GO:0005886;GO:0005886;GO:0005901;GO:0006811;GO:0006814;GO:0006814;GO:0009986;GO:0010765;GO:0014704;GO:0016020;GO:0016021;GO:0017134;GO:0019899;GO:0019901;GO:0019904;GO:0030018;GO:0030315;GO:0030506;GO:0031625;GO:0035725;GO:0042383;GO:0044325;GO:0050998;GO:0051899;GO:0055085;GO:…	K04838	-	P	12NIT;0V4YY;KOG2301;09U04;0DF9X;1B2J3;195RU;0UGHZ;1CPZK	sodium voltage-gated channel alpha subunit 5 [Source:RGD Symbol;Acc:3637]	25665	P15389
ENSRNOG00000031163	142.893	51.1008	234.685	4.59259	2.19931	0.00175303	0.101617	11	47243342	47271487	+	4052	Nfkbiz	GO:0005515;GO:0005634;GO:0005634;GO:0006954;GO:0010468;GO:0050729;GO:0050852;GO:2000321;GO:0005515;GO:0005634;GO:0005634;GO:0005634;GO:0006954;GO:0006954;GO:0010468;GO:0016607;GO:0036464;GO:0050729;GO:0050729;GO:0050852;GO:0050852;GO:2000321;GO:2000321;	K14242	-	K;E	0DKBA;KOG0504;13JN0;09YW3;0V9TX	NFKB inhibitor zeta [Source:RGD Symbol;Acc:1310834]	304005	D4A1S9
ENSRNOG00000003738	75.6452	112.427	38.8631	0.345673	-1.53252	0.00175828	0.101617	13	106751625	107427329	+	15650	Ush2a	GO:0001917;GO:0002141;GO:0002142;GO:0005515;GO:0005518;GO:0005518;GO:0005604;GO:0005604;GO:0005737;GO:0007605;GO:0016324;GO:0017022;GO:0032391;GO:0032421;GO:0035315;GO:0036064;GO:0042802;GO:0045184;GO:0045494;GO:0045494;GO:0048496;GO:0050953;GO:0060113;GO:0060171;GO:1990075;GO:1990696;	K19636	-	W	09WNF;12RDZ;0DHY3;0UK9N;1CSNP;0V7M1;KOG1836	usherin [Source:RGD Symbol;Acc:628777]	289369	-
ENSRNOG00000006681	233.455	146.965	319.946	2.17702	1.12236	0.00179974	0.103684	5	2603505	2632030	-	2946	Rdh10	GO:0001656;GO:0001701;GO:0002138;GO:0002138;GO:0004745;GO:0004745;GO:0005737;GO:0007601;GO:0008406;GO:0009887;GO:0014032;GO:0016020;GO:0016021;GO:0016491;GO:0031076;GO:0035115;GO:0042572;GO:0042574;GO:0043583;GO:0043584;GO:0048568;GO:0048703;GO:0052650;GO:0055114;GO:0060431;GO:0060449;	K11151	EC:1.1.1.-	Q	KOG1201;0DJ5E;1CTXA;0UHPJ;0VBEB;1ATA6;192UK;09Z8W;12XSB	retinol dehydrogenase 10 [Source:RGD Symbol;Acc:727793]	353252	Q80ZF7
ENSRNOG00000046327	1159.21	775.544	1542.88	1.98941	0.992342	0.001838	0.104951	14	59658935	59735450	-	4278	Rbpj	GO:0000122;GO:0000978;GO:0000978;GO:0000978;GO:0000978;GO:0000981;GO:0001103;GO:0001228;GO:0001228;GO:0001228;GO:0001525;GO:0001756;GO:0001837;GO:0001974;GO:0002193;GO:0002193;GO:0002437;GO:0003139;GO:0003151;GO:0003157;GO:0003160;GO:0003176;GO:0003177;GO:0003198;GO:0003214;GO:0003222;GO:0003256;GO:0003677;GO:0003677;GO:0003677;GO:0003677;GO:0003682;GO:0003700;GO:0003700;GO:0005634;GO:0005634;GO:…	K06053	-	K	KOG3743;12T7Q;0V54V;1CQ58;09U5V;0UFH9;0DFFF	recombination signal binding protein for immunoglobulin kappa J region [Source:RGD Symbol;Acc:1593096]	679028	M0R7Q3
ENSRNOG00000014371	1315.72	1837.76	793.688	0.431878	-1.21131	0.00183886	0.104951	19	50848736	51972103	+	4038	Cdh13	GO:0000278;GO:0001938;GO:0001938;GO:0001954;GO:0001954;GO:0002040;GO:0002040;GO:0002040;GO:0003674;GO:0005509;GO:0005509;GO:0005509;GO:0005509;GO:0005615;GO:0005615;GO:0005737;GO:0005737;GO:0005886;GO:0005886;GO:0005886;GO:0005886;GO:0005886;GO:0005886;GO:0005901;GO:0005901;GO:0007155;GO:0007155;GO:0007156;GO:0007156;GO:0007156;GO:0007156;GO:0007156;GO:0007162;GO:0007162;GO:0007266;GO:0007266;GO:…	K06808	-	Z;U	19014;0A0VD;KOG3594;12N25;0URUD;1CXDX;0VBRU;0DNGI;1B1V2	cadherin 13 [Source:RGD Symbol;Acc:619745]	192248	Q8R490
ENSRNOG00000036689	3102.05	2035.1	4169	2.04855	1.0346	0.00183903	0.104951	10	109736458	109747987	-	2489	P4hb	GO:0003756;GO:0003756;GO:0003779;GO:0004656;GO:0005178;GO:0005178;GO:0005783;GO:0005783;GO:0005793;GO:0005829;GO:0005856;GO:0009897;GO:0009897;GO:0015037;GO:0016222;GO:0016972;GO:0018401;GO:0030027;GO:0032991;GO:0034663;GO:0034975;GO:0034976;GO:0045785;GO:0046598;GO:0046982;GO:0071456;GO:0098761;GO:1900026;GO:1902175;	K09580	EC:5.3.4.1	O	18VCD;09UNI;0DJ22;0UPA4;KOG0190;1CTTN;1B4V7;0V5N3;12P44	prolyl 4-hydroxylase subunit beta [Source:RGD Symbol;Acc:3244]	25506	P04785
ENSRNOG00000013805	230.275	115.755	344.796	2.97868	1.57467	0.00185341	0.105378	14	81488008	81504686	+	1597	Tnip2	GO:0005654;GO:0005737;GO:0005737;GO:0005829;GO:0007249;GO:0019901;GO:0019901;GO:0023035;GO:0031593;GO:0031593;GO:0031593;GO:0034134;GO:0034134;GO:0034138;GO:0034138;GO:0034162;GO:0043032;GO:0043123;GO:0043123;GO:0043123;GO:0045944;GO:0045944;GO:0045944;GO:0046872;GO:0050821;GO:0050871;GO:0070498;GO:0070530;GO:0070530;GO:0071222;GO:2000352;GO:2000352;	-	-	T;K	18SPA;1CQP0;0V5PA;09UPQ;0DFZE;1AXXE;0IEB1;0UHIS;12NVJ	TNFAIP3 interacting protein 2 [Source:RGD Symbol;Acc:1307717]	305451	A0A0G2QC05
ENSRNOG00000039048	38.0522	17.1868	58.9175	3.42806	1.77739	0.00185809	0.105378	11	60848131	60882379	-	2526	Cd200r1	GO:0038023;GO:0150077;	K21668	-	T	0IUJX;09UBR;13MZY;0VCDX;0DHSW;0USYY;1930G;1CWFP;1B5B2	CD200 receptor 1 [Source:RGD Symbol;Acc:61837]	64357	Q9ES58
ENSRNOG00000019719	32.3031	51.1067	13.4996	0.264146	-1.92059	0.00187253	0.105868	4	159077195	159079003	-	1809	Kcna5	GO:0005216;GO:0005249;GO:0005251;GO:0005515;GO:0005886;GO:0005886;GO:0005887;GO:0006811;GO:0006813;GO:0006813;GO:0007219;GO:0008076;GO:0008076;GO:0009986;GO:0014704;GO:0014704;GO:0015271;GO:0016020;GO:0016020;GO:0019229;GO:0019901;GO:0034705;GO:0042391;GO:0042391;GO:0043266;GO:0045121;GO:0051260;GO:0051393;GO:0055085;GO:0060081;GO:0060372;GO:0071805;GO:0086014;GO:0086050;GO:0086052;GO:0086087;GO:…	K04878	-	P	0UT61;1CZF4;09UK7;0DFVW;KOG1545;1B543;12QRV;0V5JH;195Q9	potassium voltage-gated channel subfamily A member 5 [Source:RGD Symbol;Acc:2953]	25470	P19024
ENSRNOG00000007707	231.676	317.14	146.212	0.461034	-1.11706	0.00191339	0.107843	4	78067689	78075398	-	4249	Zfp467	GO:0003677;GO:0005634;GO:0006355;	-	-	K	0DFQJ;1ASTP;0V5E3;18Y4Z;KOG1721;0UH52;09UER;13P1D;1CQE7	zinc finger protein 467 [Source:RGD Symbol;Acc:1561603]	500110	Q5RJR4
ENSRNOG00000054217	7.60173	0.314321	14.8891	47.3691	5.56588	0.00193926	0.108058	5	153507093	153531137	+	1230	Runx3	GO:0003677;GO:0003700;GO:0005524;GO:0005634;GO:0005634;GO:0005654;GO:0005730;GO:0005737;GO:0005829;GO:0006355;GO:0006468;GO:0043231;GO:0045893;GO:0071559;GO:1990837;GO:0003677;GO:0003700;GO:0005524;GO:0005634;GO:0006355;	K09279	-	-	-	RUNX family transcription factor 3 [Source:RGD Symbol;Acc:620082]	156726	Q91ZK1
ENSRNOG00000058780	13.0038	2.84367	23.1639	8.14577	3.02605	0.00193983	0.108058	14	87448692	87453785	+	1528	Igfbp1	GO:0005520;GO:0005520;GO:0005576;GO:0005615;GO:0005794;GO:0031994;GO:0031995;	K23578	-	-	-	insulin-like growth factor binding protein 1 [Source:RGD Symbol;Acc:2872]	25685	P21743
ENSRNOG00000001452	174.263	239.316	109.21	0.456342	-1.13181	0.00194304	0.108058	12	24473981	24476295	+	2315	Fzd9	GO:0001503;GO:0001503;GO:0001503;GO:0004888;GO:0004888;GO:0004930;GO:0005515;GO:0005737;GO:0005737;GO:0005886;GO:0005886;GO:0005886;GO:0005886;GO:0005886;GO:0007165;GO:0007166;GO:0007166;GO:0007186;GO:0007275;GO:0007405;GO:0007405;GO:0007611;GO:0007611;GO:0009986;GO:0009986;GO:0016020;GO:0016020;GO:0016020;GO:0016021;GO:0016021;GO:0016021;GO:0016021;GO:0016055;GO:0016055;GO:0017147;GO:0017147;GO:…	K02842	-	T	1AWAX;0V4SV;0UKDJ;1CQNS;0DFWZ;12NRT;KOG3577;18ZXX;09TTI	frizzled class receptor 9 [Source:RGD Symbol;Acc:628817]	266608	Q8K4C8
ENSRNOG00000012660	90.1389	45.5679	134.71	2.95625	1.56377	0.00194411	0.108058	2	143656793	143688087	+	3229	Postn	GO:0001666;GO:0001953;GO:0003073;GO:0003674;GO:0005515;GO:0005615;GO:0005615;GO:0005737;GO:0005802;GO:0007155;GO:0007155;GO:0007155;GO:0008201;GO:0008593;GO:0009612;GO:0009888;GO:0014850;GO:0014911;GO:0030198;GO:0030198;GO:0031012;GO:0031012;GO:0031594;GO:0032355;GO:0042060;GO:0044344;GO:0046872;GO:0050839;GO:0062023;GO:0071307;GO:0071356;GO:0071560;GO:1900025;GO:1990138;GO:1990523;GO:2000343;GO:…	K24790	-	W;M	0V4XK;KOG1437;0DIVC;0UMH6;1CTKR;13I26;09TYN	periostin [Source:RGD Symbol;Acc:1305285]	361945	D3ZAF5
ENSRNOG00000008125	19.4423	35.3782	3.50644	0.099113	-3.33478	0.00194688	0.108058	4	172709724	172711074	+	1351	Igbp1b	GO:0005829;GO:0009966;GO:0009966;GO:0035303;GO:0051721;	K17606	-	T	0V8DV;KOG2830;1CTIK;13IT8;0DIT8;0UMEE;09XFP	immunoglobulin (CD79A) binding protein 1b [Source:RGD Symbol;Acc:1560971]	502919	D3ZMB4
ENSRNOG00000007290	18541.3	24348.2	12734.3	0.52301	-0.93509	0.00195653	0.108263	13	90651686	90676629	-	5128	Atp1a2	GO:0000166;GO:0000166;GO:0000166;GO:0001504;GO:0001504;GO:0001662;GO:0001662;GO:0002026;GO:0002026;GO:0002087;GO:0002087;GO:0005391;GO:0005391;GO:0005391;GO:0005391;GO:0005391;GO:0005496;GO:0005496;GO:0005515;GO:0005524;GO:0005524;GO:0005524;GO:0005524;GO:0005524;GO:0005737;GO:0005737;GO:0005768;GO:0005886;GO:0005886;GO:0005886;GO:0005890;GO:0005890;GO:0005890;GO:0005901;GO:0006811;GO:0006813;GO:…	K01539	EC:7.2.2.13	P	0UTC5;0DGSY;0V6HG;18YC1;12SUH;1CRH1;KOG0203;1B02V;09VI8	ATPase Na+/K+ transporting subunit alpha 2 [Source:RGD Symbol;Acc:2168]	24212	P06686
ENSRNOG00000012098	2870.59	3877.43	1863.76	0.480669	-1.05688	0.00196309	0.108297	4	85662892	85711696	+	6428	Adcyap1r1	GO:0004888;GO:0004930;GO:0004999;GO:0007166;GO:0007186;GO:0016020;GO:0016021;GO:0043231;GO:0043235;GO:0004888;GO:0004930;GO:0004999;GO:0007166;GO:0007186;GO:0016020;GO:0016021;GO:0004888;GO:0004930;GO:0004999;GO:0007166;GO:0007186;GO:0016020;GO:0016021;GO:0004888;GO:0004930;GO:0004999;GO:0007166;GO:0007186;GO:0016020;GO:0016021;	K04587	-	T	0DPQP;0A22Q;1AUEQ;0VCY5;1CYPW;KOG4564;18WNY;0UN9M;13N30	ADCYAP receptor type I [Source:RGD Symbol;Acc:2038]	24167	P32215
ENSRNOG00000027392	17.1211	29.2367	5.00552	0.171207	-2.54619	0.00197483	0.108615	3	3724656	3747440	-	3123	Ccdc187	GO:0005813;GO:0005813;GO:0008017;GO:0008017;GO:0034453;GO:0034453;	-	-	S	0DJIP;09Y5B;0J9FE;1B4J7;0V92W;19501;1CUB9;140FB;0UN9T	coiled-coil domain containing 187 [Source:RGD Symbol;Acc:1565512]	499759	-
ENSRNOG00000014795	912.052	1219.77	604.333	0.495449	-1.01319	0.00198867	0.108894	2	5569935	5579894	-	2638	Nr2f1	GO:0000122;GO:0000978;GO:0001227;GO:0003700;GO:0003700;GO:0005634;GO:0005654;GO:0005829;GO:0006355;GO:0008270;GO:0043565;GO:0043565;GO:1990837;GO:0000122;GO:0000122;GO:0000978;GO:0000978;GO:0001227;GO:0001764;GO:0003700;GO:0004879;GO:0005634;GO:0005634;GO:0006357;GO:0007399;GO:0010468;GO:0010977;GO:0021796;GO:0030154;GO:0030522;GO:0030900;GO:0043565;GO:0044323;GO:0045944;GO:0045944;GO:0048856;GO:…	K08547	-	K	1953R;0DG1V;09US9;12TH6;1CQRD;0UND5;0V5RS;1B1RV;KOG3575	nuclear receptor subfamily 2, group F, member 1 [Source:RGD Symbol;Acc:621682]	81808	Q62681
ENSRNOG00000027730	38.775	59.8999	17.6501	0.294659	-1.76288	0.00199186	0.108894	8	52751854	52763598	+	1944	Nxpe1	-	-	-	S	1CYRG;0A27H;0UPCB;0V4XX;0DF8A;0IF0E;1AY94;191HM;12NFD	neurexophilin and PC-esterase domain family, member 1 [Source:RGD Symbol;Acc:1566243]	500992	F1M016
ENSRNOG00000003975	2460.19	1666.24	3254.14	1.95298	0.96568	0.0020175	0.109705	10	57273005	57275708	-	816	Pfn1	GO:0001843;GO:0003779;GO:0005634;GO:0005737;GO:0006357;GO:0030036;GO:0031267;GO:0060074;GO:0098885;GO:0098978;	K05759	-	Z	0V8PQ;18Y70;1CTW2;0UMT0;13I2C;1AX9H;09XRZ;KOG1755;0DJ46	profilin 1 [Source:RGD Symbol;Acc:621825]	64303	P62963
ENSRNOG00000015434	1103.88	742.772	1464.98	1.97231	0.979888	0.00201874	0.109705	7	12414733	12424367	-	3345	Midn	GO:0005515;GO:0005634;GO:0005634;GO:0005737;GO:0005829;	-	-	S;O	12NPD;18VN5;0UUDX;09UCY;1CQC6;0DFNP;0V5C5;0IE7U;1AWNX	midnolin [Source:RGD Symbol;Acc:1309629]	314623	D4AE48
ENSRNOG00000006767	6.00444	0	12.0089	Inf	Inf	0.00202893	0.10993	3	146365092	146373365	+	1140	Cst7	GO:0004869;GO:0004869;GO:0004869;GO:0004869;GO:0004869;GO:0005615;GO:0005615;GO:0005615;GO:0005615;GO:0005737;GO:0005737;GO:0005764;GO:0005764;GO:0005764;GO:0005764;GO:0005768;GO:0005768;GO:0005770;GO:0005770;GO:0005770;GO:0005771;GO:0005771;GO:0005783;GO:0005783;GO:0005783;GO:0005783;GO:0005794;GO:0005794;GO:0005794;GO:0005794;GO:0006955;GO:0006955;GO:0010466;GO:0010466;GO:0010466;GO:0030414;GO:…	K13903	-	O	13U6Y;0A7N3;0J26J;0VIGK;193KU;0DUAH;1B62X;1D3S4;0UVC4	cystatin F [Source:RGD Symbol;Acc:1309154]	296257	D3ZCV2
ENSRNOG00000009708	52.9928	79.1026	26.8829	0.339848	-1.55704	0.0020534	0.110829	5	169200287	169212170	-	2841	Tas1r1	GO:0004930;GO:0007186;GO:0008527;GO:0016021;GO:0050917;	K04624	-	W;T	1CQ05;09U0P;0DFAE;KOG1056;0UGIR;0V4ZE;1AU74;13MM3;18WNA	taste 1 receptor member 1 [Source:RGD Symbol;Acc:61891]	29407	Q9Z0R8
ENSRNOG00000020300	208.104	63.9262	352.281	5.51075	2.46225	0.00205769	0.110829	1	215628785	215662504	+	1234	Lsp1	GO:0003779;GO:0003779;GO:0006935;GO:0006935;GO:0006952;GO:0006952;GO:0007165;GO:0007165;GO:0098761;GO:0098761;	K14957	-	T	KOG3656;0VCRI;0A5RQ;1AZ9B;191HK;1D2A1;13MTQ;0UR8V;0DSFT	lymphocyte-specific protein 1 [Source:RGD Symbol;Acc:1306133]	361680	Q4QQV6
ENSRNOG00000024952	45.9298	4.10834	87.7512	21.3593	4.41679	0.00207074	0.111203	18	60013382	60095354	-	6028	Atp8b1	GO:0000166;GO:0000166;GO:0000166;GO:0000287;GO:0000287;GO:0003674;GO:0005319;GO:0005319;GO:0005524;GO:0005524;GO:0005524;GO:0005654;GO:0005783;GO:0005783;GO:0005783;GO:0005794;GO:0005794;GO:0005794;GO:0005802;GO:0005829;GO:0005886;GO:0005886;GO:0005886;GO:0005886;GO:0005886;GO:0005887;GO:0005887;GO:0006855;GO:0006855;GO:0007030;GO:0007605;GO:0007605;GO:0008150;GO:0008206;GO:0008206;GO:0015247;GO:…	K01530	EC:7.6.2.1	P	1DEEG;0B0RP;0E78M;0V2D3;14TYS;1BA9D;196WC;0WD8Z;0KDRM	ATPase phospholipid transporting 8B1 [Source:RGD Symbol;Acc:1308488]	291555	-
ENSRNOG00000004100	244.444	92.4137	396.473	4.2902	2.10104	0.00208165	0.11146	7	99954492	99961026	+	1972	Trib1	GO:0004672;GO:0004672;GO:0004860;GO:0004860;GO:0005524;GO:0005524;GO:0005634;GO:0005634;GO:0005634;GO:0005737;GO:0005737;GO:0006468;GO:0006468;GO:0006469;GO:0006469;GO:0007254;GO:0007254;GO:0008134;GO:0008134;GO:0008134;GO:0014912;GO:0014912;GO:0031434;GO:0031434;GO:0031434;GO:0031625;GO:0031625;GO:0031665;GO:0031665;GO:0032436;GO:0032436;GO:0032436;GO:0032496;GO:0032496;GO:0032496;GO:0043405;GO:…	K08814	-	T	1CTRK;KOG0583;12P1G;0V8UE;09XWW;1B3UK;0UQNY;18WDS;0DJ05	tribbles pseudokinase 1 [Source:RGD Symbol;Acc:621596]	78969	G3V6J8;Q9EQL6
ENSRNOG00000006144	341.055	460.953	221.157	0.479781	-1.05955	0.00209311	0.111745	4	134784668	135069970	-	4126	Cntn3	GO:0005515;GO:0005886;GO:0007155;GO:0007399;GO:0016020;GO:0031225;GO:0043005;GO:0046658;GO:0098609;	K06761	-	T	1CT2J;1ARQS;12P91;0DHM2;KOG3513;0UFW7;09X1D;1950A;0V64Z	contactin 3 [Source:RGD Symbol;Acc:3253]	54279	Q62682
ENSRNOG00000020136	39.824	4.33714	75.3108	17.3642	4.11804	0.00211095	0.112368	15	34378148	34392066	-	3377	Tgm1	GO:0003810;GO:0003810;GO:0010838;GO:0016020;GO:0018149;GO:0018149;GO:0030216;GO:0031224;GO:0042802;GO:0045787;	K05619	EC:2.3.2.13	O	0V54T;12WTW;0IFMV;09U5T;18XJJ;1D059;0DFFC;0UJVS;1AUCQ	transglutaminase 1 [Source:RGD Symbol;Acc:61838]	60335	P23606
ENSRNOG00000019926	254.148	348.554	159.743	0.458303	-1.12563	0.00211876	0.112455	9	98313632	98364205	+	808	Ramp1	GO:0001525;GO:0001635;GO:0005886;GO:0006816;GO:0006886;GO:0007186;GO:0007189;GO:0008277;GO:0009986;GO:0015026;GO:0015026;GO:0015031;GO:0016021;GO:0031623;GO:0043235;GO:0060050;GO:0072659;GO:0097643;GO:0097647;GO:0150056;GO:1990406;GO:1990407;GO:1990408;	K08447	-	W;T	0DUT0;1963N;1D42H;0VIKD;0A839;1B635;0IZHQ;0UVS0;13SUZ	receptor activity modifying protein 1 [Source:RGD Symbol;Acc:61870]	58965	Q9JJ74
ENSRNOG00000019592	66.2413	97.8241	34.6584	0.354293	-1.49699	0.00212692	0.11256	9	97183214	97290639	-	2663	Iqca	GO:0005524;GO:0005524;GO:0016887;GO:0016887;GO:0005524;GO:0005524;GO:0016887;GO:0016887;	-	-	O;T	09XQ0;KOG0740;0DN30;0V8MP;12QNZ;1ASI4;18TE4;0URBR;1CWZH	IQ motif containing with AAA domain [Source:MGI Symbol;Acc:MGI:1922168]	-	-
ENSRNOG00000017808	308.685	415.19	202.18	0.486957	-1.03813	0.00214356	0.113111	4	122365093	122377659	+	2428	Klf15	GO:0000976;GO:0000976;GO:0000977;GO:0000977;GO:0000978;GO:0000978;GO:0000978;GO:0000981;GO:0001228;GO:0001228;GO:0001678;GO:0001678;GO:0003677;GO:0003677;GO:0003700;GO:0003700;GO:0005634;GO:0005634;GO:0005634;GO:0005654;GO:0006357;GO:0010001;GO:0010001;GO:0010468;GO:0010468;GO:0014898;GO:0014898;GO:0016607;GO:0030111;GO:0030111;GO:0032868;GO:0032868;GO:0043231;GO:0045893;GO:0045893;GO:0045944;GO:…	K09210	-	K	0DKYE;194MN;0VACX;0UTYX;KOG1721;1B4IY;12TNQ;09ZFU;1CVTD	Kruppel-like factor 15 [Source:RGD Symbol;Acc:70918]	85497	Q5FVT6;Q9WTQ3
ENSRNOG00000014378	28.3012	5.1591	51.4433	9.97137	3.31779	0.00217579	0.11448	9	46840992	46881264	+	1439	Il1r2	GO:0004908;GO:0004908;GO:0004908;GO:0004910;GO:0004910;GO:0005737;GO:0010955;GO:0016020;GO:0016021;GO:0019221;GO:0019966;GO:0032690;GO:1900016;GO:2000660;	K04387	-	T	13JKH;1AUSK;0UJ9N;0DH7J;1CRXR;09VYU;0IJCQ;0V6X6;18ZQ1	interleukin 1 receptor type 2 [Source:RGD Symbol;Acc:621147]	117022	P43303
ENSRNOG00000003703	160.149	96.7622	223.536	2.31016	1.20799	0.00219591	0.114698	13	45042882	45068077	-	2917	Mcm6	GO:0000166;GO:0003677;GO:0003677;GO:0003677;GO:0003678;GO:0003678;GO:0003678;GO:0003678;GO:0003678;GO:0003697;GO:0004386;GO:0005524;GO:0005524;GO:0005524;GO:0005634;GO:0005634;GO:0005634;GO:0005634;GO:0005634;GO:0005654;GO:0005694;GO:0006260;GO:0006260;GO:0006260;GO:0006268;GO:0006270;GO:0006270;GO:0007049;GO:0016787;GO:0016887;GO:0032508;GO:0032508;GO:0042555;GO:0042555;GO:0042555;GO:0042802;	K02542	EC:3.6.4.12	L	0DGF8;18VIT;0V65Z;KOG0480;0UK0K;12P59;1CWTI;09V6E;1B294	minichromosome maintenance complex component 6 [Source:RGD Symbol;Acc:61967]	29685	A9CMB8
ENSRNOG00000012876	210.637	345.768	75.5052	0.21837	-2.19516	0.00219877	0.114698	4	153874852	153912155	+	2436	Slc6a13	GO:0005332;GO:0005368;GO:0005886;GO:0005887;GO:0006836;GO:0008028;GO:0010940;GO:0015171;GO:0015718;GO:0015734;GO:0016020;GO:0016021;GO:0016323;GO:0071705;GO:0089718;GO:0005332;GO:0005332;GO:0005886;GO:0005887;GO:0005887;GO:0006836;GO:0006836;GO:0006836;GO:0015293;GO:0015812;GO:0016020;GO:0016020;GO:0016020;GO:0016021;GO:0016021;GO:0016021;GO:0055085;	K05046	-	P	KOG3659;0UQ5V;12NMW;09U0F;0DHIB;1ARAK;1CQKB;0V4BE;1927T	solute carrier family 6 member 13 [Source:RGD Symbol;Acc:620788]	171163	P31646
ENSRNOG00000055962	562.88	374.019	751.74	2.00989	1.00712	0.00219962	0.114698	X	157319046	157331204	-	2426	Bgn	GO:0005515;GO:0005539;GO:0009986;GO:0019800;GO:0030133;GO:0031012;GO:0042383;GO:0050840;GO:0060348;GO:0061975;	K08118	-	-	-	biglycan [Source:RGD Symbol;Acc:2207]	25181	P47853
ENSRNOG00000011683	75.6497	42.1849	109.114	2.58658	1.37104	0.00220513	0.114698	1	142174648	142183884	-	2799	Fes	GO:0000166;GO:0001578;GO:0001578;GO:0004672;GO:0004672;GO:0004672;GO:0004672;GO:0004713;GO:0004713;GO:0004713;GO:0004713;GO:0004713;GO:0004713;GO:0004714;GO:0004715;GO:0004715;GO:0004715;GO:0004715;GO:0005102;GO:0005524;GO:0005524;GO:0005524;GO:0005737;GO:0005737;GO:0005737;GO:0005856;GO:0005886;GO:0005925;GO:0005925;GO:0006468;GO:0006468;GO:0006935;GO:0007098;GO:0007098;GO:0007155;GO:0007169;GO:…	K07527	EC:2.7.10.2	Z;T	0DF0D;1ARXF;0V4P6;18SQH;0UG4F;KOG0194;09TQ2;1CPQ4;12U0U	FES proto-oncogene, tyrosine kinase [Source:RGD Symbol;Acc:1564385]	361597	D4A584
ENSRNOG00000012874	720.171	959.09	481.252	0.50178	-0.994872	0.00221182	0.114718	1	134699299	134742514	+	3401	Rgma	GO:0001843;GO:0001843;GO:0003674;GO:0005102;GO:0005102;GO:0005783;GO:0005886;GO:0005886;GO:0009986;GO:0009986;GO:0010975;GO:0010975;GO:0010976;GO:0010977;GO:0010977;GO:0015026;GO:0015026;GO:0015026;GO:0015026;GO:0015026;GO:0016020;GO:0030509;GO:0030509;GO:0030509;GO:0030509;GO:0030509;GO:0030510;GO:0030510;GO:0031175;GO:0031175;GO:0031225;GO:0043005;GO:0043547;GO:0043547;GO:0045944;GO:0045944;GO:…	K23096	-	O;T	1B1XC;0V50I;0IFAH;1CQ15;190SP;09U1P;0DFBD;13KHI;0UTKR	repulsive guidance molecule BMP co-receptor a [Source:RGD Symbol;Acc:1311983]	308739	D4A188
ENSRNOG00000021729	423.954	573.019	274.888	0.47972	-1.05974	0.00223121	0.115396	4	51482170	51586881	-	3033	Iqub	GO:0001669;GO:0001669;GO:0007224;GO:0007224;GO:0030030;GO:0031514;GO:0031514;GO:0060271;GO:0060271;	K24838	-	Z;S	0IEKT;1CTSU;0V8MA;0DEPR;18TXP;0UPQJ;09TY8;1B29K;12SDD	IQ motif and ubiquitin domain containing [Source:RGD Symbol;Acc:4145674]	296936	Q45GW3
ENSRNOG00000004603	212.927	134.029	291.826	2.17733	1.12256	0.00224091	0.115516	7	63973279	64251110	-	3258	Srgap1	GO:0005096;GO:0005096;GO:0005096;GO:0005515;GO:0005737;GO:0007165;GO:0007165;GO:0007266;GO:0016477;GO:0030336;GO:0031267;GO:0043547;	K07526	-	T	KOG3565;1AUAZ;0V5QS;0DG0Y;0UHM1;1CQQK;12NWK;09UR6	SLIT-ROBO Rho GTPase activating protein 1 [Source:RGD Symbol;Acc:1566260]	314903	F1M287
ENSRNOG00000010775	247.215	159.003	335.427	2.10956	1.07694	0.00224624	0.115516	1	129766100	129780356	-	4287	Arrdc4	GO:0005768;GO:0005886;GO:0005886;GO:0015031;GO:0016567;GO:0043231;GO:0051443;GO:0140112;GO:1903561;GO:1990756;GO:0005737;GO:0005768;GO:0005768;GO:0005769;GO:0005886;GO:0005886;GO:0005886;GO:0015031;GO:0015031;GO:0015031;GO:0016020;GO:0016567;GO:0016567;GO:0031410;GO:0051443;GO:0140112;GO:0140112;GO:1903561;GO:1903561;GO:1990756;GO:1990756;GO:1990756;	-	-	C	KOG3780	arrestin domain containing 4 [Source:RGD Symbol;Acc:1311763]	293019	Q7TP90
ENSRNOG00000000909	815.898	550.198	1081.6	1.96584	0.975143	0.00225755	0.115771	12	6929978	6956984	-	3701	Uspl1	GO:0001825;GO:0008283;GO:0009301;GO:0015030;GO:0015030;GO:0016926;GO:0016926;GO:0030576;GO:0030576;GO:0030576;GO:0030576;GO:0032183;GO:0032183;GO:0032183;GO:0032183;GO:0070140;GO:0070140;GO:0070140;GO:0070140;GO:0001825;GO:0008283;GO:0008283;GO:0009301;GO:0009301;GO:0015030;GO:0015030;GO:0015030;GO:0016926;GO:0016926;GO:0016926;GO:0030576;GO:0030576;GO:0030576;GO:0030576;GO:0030576;GO:0032183;GO:…	K23008	EC:3.4.22.-	O	13IJV;09UNR;1AV12;0V88A;0DIMF;1CTCB;0USZP;0IJ9P;18VWH	ubiquitin specific peptidase like 1 [Source:RGD Symbol;Acc:1310835]	288447	D3ZTS4
ENSRNOG00000015283	58.7201	86.9157	30.5246	0.351197	-1.50965	0.00229081	0.117146	5	140888973	140904207	+	1367	Nt5c1a	GO:0000166;GO:0000166;GO:0000287;GO:0000287;GO:0005737;GO:0005737;GO:0005829;GO:0005829;GO:0008253;GO:0008253;GO:0008253;GO:0008253;GO:0008253;GO:0009117;GO:0009117;GO:0009128;GO:0009128;GO:0016311;GO:0046059;GO:0046085;GO:0046085;	K01081	EC:3.1.3.5	F	0V5Y9;0UNZ4;12S4T;0DG7R;1AVB8;190GU;09UYB;0IE01;1CQX9	5'-nucleotidase, cytosolic IA [Source:RGD Symbol;Acc:1310908]	313574	D3ZVD3
ENSRNOG00000001229	397.55	260.874	534.226	2.04783	1.0341	0.0023124	0.117919	20	12225202	12332858	+	5007	Col18a1	GO:0001525;GO:0001525;GO:0001886;GO:0001886;GO:0003674;GO:0005201;GO:0005581;GO:0005604;GO:0005615;GO:0005615;GO:0008284;GO:0030198;GO:0030198;GO:0030335;GO:0030938;GO:0031012;GO:0042493;GO:0051599;GO:2000353;	K06823	-	W	190Y6;09X6K;13HQD;1B2RC;0V854;0DIHW;KOG3546;0UQUR;1CPIV	collagen type XVIII alpha 1 chain [Source:RGD Symbol;Acc:70936]	85251	F1LR02
ENSRNOG00000021264	733.385	493.427	973.343	1.97262	0.980111	0.00235712	0.119864	3	124880698	124884570	-	1160	Pcna	GO:0000122;GO:0000307;GO:0000701;GO:0000785;GO:0003677;GO:0003682;GO:0003684;GO:0005634;GO:0005634;GO:0005652;GO:0005654;GO:0005657;GO:0005657;GO:0005813;GO:0006275;GO:0006287;GO:0006298;GO:0008022;GO:0008134;GO:0016604;GO:0019899;GO:0019899;GO:0019985;GO:0030337;GO:0030855;GO:0030971;GO:0031297;GO:0032077;GO:0032139;GO:0032405;GO:0034644;GO:0035035;GO:0042802;GO:0043596;GO:0043626;GO:0044877;GO:…	K04802	-	L	09XJK;0US1G;0V8HJ;1CZE3;194MP;1B236;0DQC1;KOG1636;12NN3	proliferating cell nuclear antigen [Source:RGD Symbol;Acc:3269]	25737	P04961
ENSRNOG00000018170	1515.79	1995.87	1035.72	0.51893	-0.946388	0.00236595	0.11992	16	19999112	20016190	+	3186	Slc27a1	GO:0000166;GO:0001579;GO:0001676;GO:0004467;GO:0004467;GO:0004467;GO:0005324;GO:0005783;GO:0005886;GO:0005886;GO:0005887;GO:0006646;GO:0006654;GO:0006655;GO:0006656;GO:0006659;GO:0006661;GO:0009409;GO:0009925;GO:0010867;GO:0015225;GO:0015245;GO:0015245;GO:0015245;GO:0015562;GO:0015878;GO:0015908;GO:0015909;GO:0015909;GO:0015911;GO:0016021;GO:0016021;GO:0031652;GO:0031957;GO:0031957;GO:0031957;GO:…	K08745	EC:6.2.1.-	P;I	1ATUU;0UU7E;KOG1179;12N3R;18W8T;1CS9A;0DICZ;09TFA;0V4ED	solute carrier family 27 member 1 [Source:RGD Symbol;Acc:620927]	94172	Q6GMM8
ENSRNOG00000002811	359.214	525.765	192.664	0.366445	-1.44833	0.00237396	0.11992	13	63526486	63959332	+	3039	Brinp3	GO:0003674;GO:0005576;GO:0005739;GO:0005783;GO:0005783;GO:0007049;GO:0007050;GO:0007399;GO:0030425;GO:0030425;GO:0043025;GO:0043025;GO:0045666;GO:0045666;GO:0045666;GO:0045666;GO:0045666;GO:0045666;GO:0045786;GO:0045930;GO:0045930;GO:0045930;GO:0045930;GO:0045930;GO:0045930;GO:0071300;GO:0071300;GO:0071300;GO:0071300;	-	-	O;T	1CT5W;0DMB8;0IF4X;09ZT1;18S37;1AWVS;0UT5X;12S9M;0VAPB	BMP/retinoic acid inducible neural specific 3 [Source:RGD Symbol;Acc:708421]	286901	Q8K1M7
ENSRNOG00000021795	132.636	195.483	69.7899	0.357013	-1.48595	0.00237799	0.11992	7	120846330	120882392	-	2304	Fam227a	-	-	-	S	1B38K;0IEYD;13KF2;0UK5V;0VA76;1CVKY;19265;09UII;0DKSA	family with sequence similarity 227, member A [Source:RGD Symbol;Acc:1305939]	300074	Q4V8A5
ENSRNOG00000055716	16.7616	5.02164	28.5016	5.67576	2.50481	0.00239097	0.120242	1	64182422	64188658	+	2029	Oscar	GO:0009986;GO:0009986;GO:0016020;GO:0016021;GO:0030316;GO:0030316;GO:0038064;GO:0038064;GO:0038065;GO:0038094;GO:0038094;GO:0045780;GO:0045780;GO:0072674;GO:0072674;	K14377	-	-	-	osteoclast associated Ig-like receptor [Source:RGD Symbol;Acc:1559897]	292537	D3ZCA1
ENSRNOG00000046258	8.88279	1.26098	16.5046	13.0887	3.71025	0.00239893	0.12031	11	84919066	84931160	-	4198	B3gnt5	GO:0000139;GO:0005794;GO:0005794;GO:0006486;GO:0006486;GO:0006486;GO:0006486;GO:0007275;GO:0007417;GO:0007417;GO:0007420;GO:0007420;GO:0008375;GO:0008376;GO:0008457;GO:0008457;GO:0008457;GO:0008457;GO:0016020;GO:0016020;GO:0016020;GO:0016021;GO:0016740;GO:0016757;GO:0016758;GO:0047256;GO:0047256;	K03766	EC:2.4.1.206	G	09TX1;KOG2287;1CPX1;0UGDY;1AS2W;18SWV;0DF7G;0V4W5;12Y0M	UDP-GlcNAc:betaGal beta-1,3-N- acetylglucosaminyltransferase 5 [Source:RGD Symbol;Acc:70955]	116740	Q99NB2
ENSRNOG00000002440	381.507	250.059	512.955	2.05134	1.03656	0.00241047	0.120557	13	35494721	35511020	-	2059	Ralb	GO:0000166;GO:0001934;GO:0003924;GO:0003924;GO:0003924;GO:0003924;GO:0003925;GO:0005525;GO:0005525;GO:0005525;GO:0005525;GO:0005886;GO:0005886;GO:0005886;GO:0007165;GO:0007165;GO:0007265;GO:0007265;GO:0009267;GO:0016020;GO:0016020;GO:0019003;GO:0030496;GO:0031625;GO:0032091;GO:0032092;GO:0051117;GO:0071360;GO:0071902;GO:2000786;	K07835	-	J	KOG0395	RAS like proto-oncogene B [Source:RGD Symbol;Acc:619852]	116546	P36860
ENSRNOG00000000572	284.633	171.795	397.471	2.31363	1.21016	0.00242058	0.120731	20	29731816	29738506	-	5573	Chst3	GO:0000139;GO:0000139;GO:0005975;GO:0005975;GO:0006790;GO:0008146;GO:0008146;GO:0008459;GO:0016020;GO:0016021;GO:0016740;GO:0030206;	K01020	EC:2.8.2.17	G;U	0A11E;191AN;0IIAV;0DKEP;0VD0C;13MM4;1D0E5;0UK91;1AVP5	carbohydrate sulfotransferase 3 [Source:RGD Symbol;Acc:620355]	84468	Q9QZL2
ENSRNOG00000026953	613.245	1066.84	159.653	0.149651	-2.74032	0.00243058	0.120898	2	219258347	219262901	-	4155	Gpr88	GO:0003774;GO:0004930;GO:0005929;GO:0007186;GO:0007626;GO:0016021;GO:0019228;GO:0050885;GO:0061743;	K08422	-	T	KOG3656;1CVA2;0UR3R;1B4KS;0DQW1;0VE36;19619;0A38G;13Q3X	G-protein coupled receptor 88 [Source:RGD Symbol;Acc:61921]	64443	Q9ESP4
ENSRNOG00000056153	7.30511	0.598868	14.0114	23.3964	4.54822	0.0024747	0.122716	5	151692108	151700246	+	2539	Tent5b	GO:1990817;	K23033	EC:2.7.7.-	-	-	terminal nucleotidyltransferase 5B [Source:RGD Symbol;Acc:1308967]	313019	B0BNK8
ENSRNOG00000015941	255.255	165.033	345.477	2.09339	1.06584	0.00248061	0.122716	10	88326080	88338207	+	2929	Fkbp10	GO:0000413;GO:0001701;GO:0003755;GO:0003755;GO:0003755;GO:0003755;GO:0003755;GO:0005509;GO:0005509;GO:0005528;GO:0005758;GO:0005783;GO:0005783;GO:0016020;GO:0016853;GO:0017185;GO:0018208;GO:0030199;GO:0035909;GO:0042060;GO:0085029;GO:0000413;GO:0001701;GO:0001701;GO:0003755;GO:0003755;GO:0003755;GO:0003755;GO:0003755;GO:0003755;GO:0005509;GO:0005509;GO:0005528;GO:0005528;GO:0005758;GO:0005758;GO:…	K09575	EC:5.2.1.8	O	0A03F;0DFD1;KOG0549;0VAZP;12U6W;1AX1P;18YBU;0UMJA;1CWIP	FKBP prolyl isomerase 10 [Source:RGD Symbol;Acc:1549751]	360627	Q5U2V1
ENSRNOG00000031244	258.773	167.292	350.255	2.09367	1.06603	0.00248977	0.122836	18	4371051	4371899	-	849	LOC108349606	GO:0042254;GO:1990904;	-	-	J	KOG3166	60S ribosomal protein L7a-like [Source:RGD Symbol;Acc:11408721]	-	-
ENSRNOG00000060614	342	221.107	462.894	2.09353	1.06594	0.0025059	0.123297	6	48866601	48980340	+	4562	Pxdn	GO:0004601;GO:0004601;GO:0004601;GO:0004601;GO:0005201;GO:0005515;GO:0005576;GO:0005615;GO:0005783;GO:0006979;GO:0006979;GO:0019806;GO:0020037;GO:0020037;GO:0020037;GO:0030198;GO:0030199;GO:0042744;GO:0055114;GO:0062023;GO:0098869;GO:0004601;GO:0004601;GO:0005201;GO:0005515;GO:0005615;GO:0005783;GO:0006979;GO:0019806;GO:0020037;GO:0020037;GO:0030198;GO:0030198;GO:0030199;GO:0042744;GO:0055114;GO:…	K19511	EC:1.11.1.7	-	-	peroxidasin [Source:RGD Symbol;Acc:1560694]	554172	-
ENSRNOG00000036692	19.0848	6.16352	32.0061	5.19283	2.37652	0.00252495	0.123811	10	109707962	109716128	+	1928	Gcgr	GO:0004888;GO:0004930;GO:0004967;GO:0004967;GO:0004967;GO:0005887;GO:0007166;GO:0007186;GO:0007188;GO:0007188;GO:0007189;GO:0009267;GO:0010628;GO:0016020;GO:0016021;GO:0042593;GO:0042594;GO:0070873;GO:0071377;GO:0071377;GO:0004888;GO:0004888;GO:0004930;GO:0004930;GO:0004967;GO:0004967;GO:0007166;GO:0007166;GO:0007186;GO:0007186;GO:0016020;GO:0016020;GO:0016020;GO:0016021;GO:0016021;GO:0016021;GO:…	K04583	-	T	09UJY;12NT5;0DFVK;0UG6T;KOG4564;18S91;0V4SW;1CQIZ;1AY2W	glucagon receptor [Source:RGD Symbol;Acc:2669]	24953	P30082;Q66HT0
ENSRNOG00000017893	406.45	617.592	195.309	0.316243	-1.6609	0.00253843	0.123811	10	14599197	14613878	-	5643	Baiap3	GO:0000149;GO:0001956;GO:0005509;GO:0005543;GO:0005829;GO:0005886;GO:0007186;GO:0019905;GO:0031902;GO:0032588;GO:0035774;GO:0042147;GO:0055038;GO:1905413;GO:1990502;	K15621	-	T;U	1CVAE;0V4P0;1B31B;18V6J;KOG1328;0UPE5;0DKGB;12NB7;09TPU	BAI1-associated protein 3 [Source:RGD Symbol;Acc:10059729]	106146145	F1LVS1
ENSRNOG00000026306	36.3767	6.99858	65.7547	9.39544	3.23196	0.00253943	0.123811	4	68808359	68819928	-	3982	Clec5a	GO:0001618;GO:0001618;GO:0001819;GO:0002076;GO:0009986;GO:0016020;GO:0016021;GO:0030099;GO:0033033;GO:0043066;GO:0045087;GO:0045087;GO:0046718;GO:0001618;GO:0001618;GO:0001618;GO:0001618;GO:0001819;GO:0001819;GO:0002076;GO:0002076;GO:0005829;GO:0005886;GO:0009986;GO:0009986;GO:0016020;GO:0016021;GO:0030099;GO:0030099;GO:0033033;GO:0033033;GO:0043066;GO:0043066;GO:0045087;GO:0045087;GO:0045087;GO:…	-	-	T;V	0VCNG;1933D;13V5K;0USSP;0A1SS;1CYD3;0DPF0;KOG4297;1AS6W	C-type lectin domain containing 5A [Source:RGD Symbol;Acc:1584755]	-	-
ENSRNOG00000004786	43.231	65.2618	21.2002	0.324848	-1.62216	0.00254356	0.123811	7	15179467	15190796	-	2228	Cyp4f1	GO:0004497;GO:0005506;GO:0005506;GO:0016020;GO:0016491;GO:0016705;GO:0016705;GO:0020037;GO:0020037;GO:0046872;GO:0055114;	K00490	EC:1.14.14.1	Q	0DIWE;1AVU8;1CTMR;09XIZ;KOG0157;12PPT;0UMIJ;0V8GR	cytochrome P450, family 4, subfamily f, polypeptide 1 [Source:RGD Symbol;Acc:70926]	56266	Q66HK8
ENSRNOG00000005387	1192.76	814.993	1570.53	1.92705	0.946396	0.0025857	0.125527	X	15098904	15102340	+	1824	Rbm3	GO:0003676;GO:0003676;GO:0003723;GO:0005654;GO:0005737;GO:0003676;GO:0003676;GO:0003723;	K13186	-	A;K	0DQA5;0A2NJ;KOG0118;13S4X;1CZC4;195JZ;1B5PY;0VDID;0UTJM	RNA binding motif protein 3 [Source:RGD Symbol;Acc:620145]	114488	Q925G0;G3V6P6
ENSRNOG00000030888	506.29	330.689	681.892	2.06203	1.04407	0.00260479	0.125874	1	220992770	221003249	+	2443	Rela	GO:0000122;GO:0000122;GO:0000122;GO:0000785;GO:0000785;GO:0000785;GO:0000785;GO:0000976;GO:0000976;GO:0000977;GO:0000977;GO:0000977;GO:0000978;GO:0000978;GO:0000978;GO:0000978;GO:0000978;GO:0000979;GO:0000979;GO:0000981;GO:0000981;GO:0000981;GO:0000981;GO:0001225;GO:0001225;GO:0001227;GO:0001227;GO:0001227;GO:0001228;GO:0001228;GO:0001228;GO:0001889;GO:0001889;GO:0001942;GO:0001942;GO:0003677;GO:…	K04735	-	K	0IG8F;1CPFA;18YPB;09TEG;13E12;1AXQX;0DERH;0V4DN;0UFH7	RELA proto-oncogene, NF-kB subunit [Source:RGD Symbol;Acc:727889]	309165	Q7TQN4
ENSRNOG00000014479	960.453	615.957	1304.95	2.11857	1.08309	0.00260667	0.125874	2	207495055	207541645	-	4795	Cttnbp2nl	GO:0006470;GO:0006470;GO:0006470;GO:0006470;GO:0015629;GO:0015629;GO:0032410;GO:0032410;GO:0034763;GO:0034763;GO:0051721;GO:0051721;GO:0051721;	-	-	Z;S	0URCX;KOG1103;1B202;0DRAA;1D0FM;0A3PH;18Z1U;0VEIC;13N7J	CTTNBP2 N-terminal like [Source:RGD Symbol;Acc:1310822]	310760	D4A8X8
ENSRNOG00000024159	275.687	177.923	373.451	2.09895	1.06967	0.00263117	0.126627	13	89601896	89606326	-	631	Fcer1g	GO:0001798;GO:0001805;GO:0001812;GO:0002283;GO:0002283;GO:0002292;GO:0002292;GO:0002376;GO:0002431;GO:0002431;GO:0002554;GO:0004888;GO:0004888;GO:0005515;GO:0005886;GO:0005886;GO:0005887;GO:0005887;GO:0006911;GO:0007165;GO:0007166;GO:0007166;GO:0007166;GO:0007229;GO:0009897;GO:0009897;GO:0009986;GO:0009986;GO:0010543;GO:0010543;GO:0016020;GO:0016020;GO:0016020;GO:0016021;GO:0016064;GO:0016064;GO:…	K07983	-	W	0J5TQ;0VMEP;193ZN;13YQF;1B6YF;1D4XA;0DVM0;0UWCJ;0AAGG	Fc fragment of IgE receptor Ig [Source:RGD Symbol;Acc:2599]	25441	P20411;B1H251
ENSRNOG00000031421	753.79	508.897	998.683	1.96245	0.972653	0.00263617	0.126627	18	40586315	40597671	+	1827	Eif1a	GO:0003723;GO:0003743;GO:0006413;GO:0003723;GO:0003743;GO:0006413;	K03236	-	J	13R6Y;0DSEU;1D1QH;KOG3403;0A4ZZ;0VFV6	eukaryotic translation initiation factor 1A [Source:RGD Symbol;Acc:1306331]	317163	Q566D5
ENSRNOG00000032297	2568.7	1753.16	3384.24	1.93037	0.948877	0.00264552	0.126741	16	26859397	26875973	+	1849	Msmo1	GO:0005506;GO:0008610;GO:0016491;GO:0055114;	K07750	EC:1.14.18.9	I	0V7J1;12PV1;1ATJN;1CSKH;09WKE;0UI04;KOG0873;18Z1I;0DHVU	methylsterol monooxygenase 1 [Source:RGD Symbol;Acc:620281]	140910	O35532
ENSRNOG00000011777	97.2692	136.856	57.6825	0.421483	-1.24645	0.00265398	0.126813	10	65566171	65585760	+	3910	Spag5	GO:0000070;GO:0000776;GO:0005737;GO:0005829;GO:0007051;GO:0007059;GO:0008017;GO:0016604;GO:0032388;GO:0034451;GO:0035371;GO:0051294;GO:0051301;GO:0051988;GO:0051988;GO:0071539;GO:0072686;GO:0072686;GO:0090235;GO:0097431;GO:1905832;	K21764	-	Z;S	1CPFB;0IIA9;191WA;09TEH;0UFS3;13JCN;1B1RU;0DERI;0V4DP	sperm associated antigen 5 [Source:RGD Symbol;Acc:620152]	252918	Q1ERY8
ENSRNOG00000005935	178.53	65.5538	291.505	4.44681	2.15277	0.00268521	0.127771	5	146933592	146945880	+	1909	A3galt2	GO:0001962;GO:0001962;GO:0005794;GO:0005794;GO:0005975;GO:0005975;GO:0006688;GO:0006688;GO:0006688;GO:0006688;GO:0016020;GO:0016020;GO:0016020;GO:0016021;GO:0016740;GO:0016757;GO:0016757;GO:0016757;GO:0016758;GO:0016758;GO:0030259;GO:0030259;GO:0031982;GO:0031982;GO:0032580;GO:0046872;GO:0047276;GO:0047276;GO:0071287;	K20736	EC:2.4.1.87	G	12TQU;0V7AU;09WCE;1B4CJ;192DQ;0DHMS;1CSC7;0UJV3;0IHE7	alpha 1,3-galactosyltransferase 2 [Source:RGD Symbol;Acc:727913]	171553	A0A4Z3
ENSRNOG00000002232	239.531	149.728	329.334	2.19955	1.13721	0.00268807	0.127771	14	7226586	7384876	-	4908	Aff1	GO:0003674;GO:0005575;GO:0005634;GO:0005634;GO:0005634;GO:0005634;GO:0008023;GO:0008150;GO:0010468;GO:0010468;GO:0010468;GO:0032783;GO:0045893;GO:0005634;GO:0008023;GO:0010468;	K15184	-	K	1AUUS;1CPFG;0V6ID;13I7E;09VJ9;0IGJB;0UKUW;18T0P;0DERP	AF4/FMR2 family, member 1 [Source:RGD Symbol;Acc:1307940]	305152	D3ZBU5
ENSRNOG00000014387	196.23	123.295	269.165	2.1831	1.12638	0.00270147	0.128074	3	111160205	111163425	+	1569	Chac1	GO:0003839;GO:0003839;GO:0003839;GO:0005112;GO:0005112;GO:0005112;GO:0005737;GO:0005737;GO:0005794;GO:0005802;GO:0005802;GO:0005802;GO:0005829;GO:0005829;GO:0005829;GO:0006751;GO:0006751;GO:0006751;GO:0006915;GO:0006986;GO:0007219;GO:0007399;GO:0010955;GO:0010955;GO:0010955;GO:0016829;GO:0022008;GO:0022008;GO:0022008;GO:0045746;GO:0045746;GO:0045746;GO:0061928;GO:0061928;GO:0070059;GO:0070059;	K07232	EC:4.3.2.7	P	KOG3182;18TEJ;0DS4S;0US6U;1AXPF;0VFB3;1D26M;0A5IM;13PF3	ChaC glutathione-specific gamma- glutamylcyclotransferase 1 [Source:RGD Symbol;Acc:1307153]	362196	B3STU3
ENSRNOG00000033235	113.89	43.8217	183.958	4.19786	2.06965	0.00271287	0.12828	1	80517411	80544825	-	1950	Relb	GO:0000785;GO:0000785;GO:0000978;GO:0000978;GO:0000978;GO:0000978;GO:0000981;GO:0003677;GO:0003677;GO:0003677;GO:0003677;GO:0003700;GO:0003700;GO:0005634;GO:0005634;GO:0005634;GO:0005634;GO:0005634;GO:0005634;GO:0005654;GO:0005737;GO:0005737;GO:0005813;GO:0005813;GO:0005829;GO:0005829;GO:0005829;GO:0006355;GO:0006355;GO:0006357;GO:0006357;GO:0006357;GO:0006954;GO:0007249;GO:0010628;GO:0010628;GO:…	K09253	-	K	0DJYW;1AWYK;0A0WR;0IFBK;13IH3;0UNAN;18TJS;1CYNR;0VD2C	RELB proto-oncogene, NF-kB subunit [Source:RGD Symbol;Acc:2321078]	100360982	-
ENSRNOG00000009857	591.131	397.623	784.639	1.97333	0.980629	0.00273154	0.128828	10	94439077	94445503	-	2853	Ftsj3	GO:0001510;GO:0001510;GO:0005634;GO:0005654;GO:0005694;GO:0005730;GO:0006364;GO:0008168;GO:0008649;GO:0031167;GO:0032259;GO:0062105;	K14857	EC:2.1.1.-	A	12PJD;09X3D;KOG1098;0DIED;190F4;0V81U;1AWDD;0UKWZ;1CT4X	FtsJ RNA 2'-O-methyltransferase 3 [Source:RGD Symbol;Acc:1307110]	303608	Q5RJT2
ENSRNOG00000023688	193.045	270.353	115.738	0.428101	-1.22398	0.00275241	0.129343	17	11101306	11103541	+	2236	Drd1	GO:0001588;GO:0001588;GO:0001659;GO:0001661;GO:0001662;GO:0001932;GO:0001963;GO:0001975;GO:0004930;GO:0004930;GO:0004930;GO:0004930;GO:0004952;GO:0004952;GO:0004952;GO:0004952;GO:0005634;GO:0005783;GO:0005886;GO:0005886;GO:0005886;GO:0005887;GO:0005887;GO:0005929;GO:0006606;GO:0006936;GO:0007165;GO:0007186;GO:0007186;GO:0007186;GO:0007186;GO:0007187;GO:0007189;GO:0007189;GO:0007189;GO:0007190;GO:…	K04144	-	T	KOG3656;0DMV2;1CWQN;0VB4G;18TYM;0USQE;1AUGB;13HSM;0A08H	dopamine receptor D1 [Source:RGD Symbol;Acc:2518]	24316	G3V933
ENSRNOG00000056209	6.1071	0.299434	11.9148	39.791	5.31437	0.00275926	0.129343	13	93939022	93960342	+	2511	Exo1	GO:0002455;GO:0003677;GO:0003677;GO:0003682;GO:0003824;GO:0004518;GO:0005634;GO:0005654;GO:0005886;GO:0006281;GO:0006298;GO:0006310;GO:0016446;GO:0016604;GO:0016788;GO:0035312;GO:0035312;GO:0045145;GO:0045190;GO:0048256;GO:0051908;	K10746	EC:3.1.-.-	-	-	exonuclease 1 [Source:RGD Symbol;Acc:1309465]	305000	-
ENSRNOG00000012582	144.282	68.399	220.164	3.21882	1.68653	0.00276378	0.129343	16	68954875	68968248	-	831	Eif4ebp1	GO:0000082;GO:0000082;GO:0002192;GO:0002192;GO:0002931;GO:0005634;GO:0005737;GO:0005737;GO:0005829;GO:0005829;GO:0005829;GO:0006417;GO:0008190;GO:0008190;GO:0008190;GO:0008190;GO:0008190;GO:0008190;GO:0008286;GO:0008286;GO:0017148;GO:0030324;GO:0030371;GO:0030371;GO:0030371;GO:0031333;GO:0031369;GO:0031929;GO:0031929;GO:0031929;GO:0032991;GO:0045471;GO:0045931;GO:0045931;GO:0045947;GO:0045947;GO:…	K07205	-	J;K	0J2Z0;19371;1B5VM;13WGN;1D3VF;0A80N;0VIV1;0DUQ9;0UVGT	eukaryotic translation initiation factor 4E binding protein 1 [Source:RGD Symbol;Acc:620259]	116636	Q62622
ENSRNOG00000006956	113.424	163.178	63.6704	0.390189	-1.35775	0.0028063	0.130309	5	104362971	104753863	+	7973	AABR07049085.1	GO:0004222;GO:0006508;GO:0030198;GO:0031012;	-	-	O;T	09X3Z;KOG4475;139KU;0V82K;KOG3538	-	-	-
ENSRNOG00000000873	6.45007	12.5093	0.390875	0.0312469	-5.00015	0.00281019	0.130309	X	159505344	159511021	+	2679	Brs3	GO:0004930;GO:0004930;GO:0004930;GO:0004930;GO:0004946;GO:0004946;GO:0005886;GO:0005886;GO:0005887;GO:0007165;GO:0007186;GO:0007186;GO:0007186;GO:0007186;GO:0008528;GO:0008528;GO:0016020;GO:0016021;GO:0016021;GO:0016021;GO:0031989;GO:0031989;GO:0043005;GO:0043025;	K04170	-	T	KOG3656;0DG5G;09UW0;0V5VR;1ATMD;1CQV3;12PGX;0UI1P;190QF	bombesin receptor subtype 3 [Source:RGD Symbol;Acc:628645]	260319	Q8K418
ENSRNOG00000017500	2530.6	3310.12	1751.07	0.529007	-0.918642	0.00281211	0.130309	19	40905847	40925660	-	3447	Mtss2	GO:0001726;GO:0003779;GO:0003785;GO:0005096;GO:0005546;GO:0005886;GO:0007009;GO:0030027;GO:0030864;GO:0031267;GO:0031267;GO:0032587;GO:0036120;GO:0061024;GO:0090630;GO:0097178;GO:0097581;	K20128	-	Z;S;T	18UTZ;1B4DD;09TS1;1CPS7;0IGVU;0DF2F;0UQ70;0V4RB;12T1B	MTSS I-BAR domain containing 2 [Source:RGD Symbol;Acc:1309731]	307845	-
ENSRNOG00000028348	10.8935	21.4739	0.313086	0.0145798	-6.09988	0.00281303	0.130309	2	260574190	260596777	-	1756	Lhx8	GO:0000977;GO:0000981;GO:0000981;GO:0000981;GO:0001674;GO:0001674;GO:0003677;GO:0003677;GO:0003677;GO:0005634;GO:0005634;GO:0006355;GO:0006355;GO:0006357;GO:0007611;GO:0007611;GO:0008585;GO:0008585;GO:0021879;GO:0021879;GO:0021884;GO:0021884;GO:0021884;GO:0030182;GO:0042475;GO:0042475;GO:0046872;GO:1990837;GO:1990837;	K09375	-	K	0A2J2;0DP43;1CP7T;18SFK;0VECV;0UKUQ;13IEI;1AYUB;KOG0490	LIM homeobox 8 [Source:RGD Symbol;Acc:1308749]	365963	G3V6V6
ENSRNOG00000018400	180.612	247.664	113.56	0.458526	-1.12493	0.00285874	0.131817	17	5382034	5409038	+	1194	Golm1	GO:0005794;GO:0005794;GO:0006997;GO:0019216;	-	-	U	0DI63;0V57K;0UHFI;1CSWF;13N6C;0IKCK;09YXH;1AW1T;1934K	golgi membrane protein 1 [Source:RGD Symbol;Acc:1589384]	680692	-
ENSRNOG00000039744	99.6494	58.9103	140.389	2.38309	1.25283	0.00286007	0.131817	20	4673658	4935887	-	4582	RT1-CE4	GO:0002476;GO:0005615;GO:0006955;GO:0006955;GO:0009897;GO:0016020;GO:0016021;GO:0019882;GO:0019882;GO:0002476;GO:0005615;GO:0006955;GO:0006955;GO:0009897;GO:0016020;GO:0016021;GO:0019882;GO:0019882;GO:0002476;GO:0005615;GO:0006955;GO:0006955;GO:0009897;GO:0016020;GO:0016021;GO:0019882;GO:0019882;GO:0002476;GO:0005615;GO:0009897;GO:0016020;GO:0016021;	K06751	-	U	0DYTT;0ADYT;1D7I8;13R8M;0II5V;0VR67;0UXG0	RT1 class I, locus CE4 [Source:RGD Symbol;Acc:1598234]	414783	Q861Q1
ENSRNOG00000020552	247.946	47.1803	448.712	9.51058	3.24953	0.00286935	0.13191	1	220826560	220835066	+	1663	Fosl1	GO:0000977;GO:0000977;GO:0000978;GO:0000978;GO:0000978;GO:0000978;GO:0000981;GO:0001228;GO:0001701;GO:0001701;GO:0003677;GO:0003677;GO:0003677;GO:0003677;GO:0003700;GO:0003700;GO:0005634;GO:0005634;GO:0005634;GO:0005634;GO:0005634;GO:0005654;GO:0005654;GO:0005829;GO:0006355;GO:0006355;GO:0006357;GO:0006357;GO:0006357;GO:0007296;GO:0007296;GO:0007565;GO:0007612;GO:0008285;GO:0009612;GO:0009629;GO:…	K04502	-	K	0VE9S;1AV5K;1954H;KOG1414;0UJNM;13REE;0A3EX;0DHGN;1CS70	FOS like 1, AP-1 transcription factor subunit [Source:RGD Symbol;Acc:2627]	25445	P10158
ENSRNOG00000025120	100.78	161.63	39.9306	0.247049	-2.01713	0.00289454	0.132579	7	70620766	70630338	-	3903	Gli1	GO:0000976;GO:0000976;GO:0000977;GO:0000977;GO:0000977;GO:0000977;GO:0000978;GO:0000978;GO:0000978;GO:0000981;GO:0000981;GO:0000981;GO:0001649;GO:0001649;GO:0003674;GO:0003677;GO:0003677;GO:0003677;GO:0003682;GO:0003682;GO:0005575;GO:0005634;GO:0005634;GO:0005634;GO:0005634;GO:0005634;GO:0005634;GO:0005634;GO:0005654;GO:0005737;GO:0005737;GO:0005737;GO:0005829;GO:0005929;GO:0005929;GO:0005930;GO:…	K16797	-	K	0UTCF;12R27;0V98N;18V53;09YB3;KOG1721;1AZ1M;1CZ2Z;0DHR1	GLI family zinc finger 1 [Source:RGD Symbol;Acc:621673]	140589	G3V6X8
ENSRNOG00000017105	146.255	232.616	59.8939	0.25748	-1.95747	0.00290617	0.132579	2	221823687	222694627	+	4355	Dpyd	GO:0006210;GO:0006212;GO:0017113;GO:0051536;GO:0051536;GO:0003824;GO:0003824;GO:0005737;GO:0005737;GO:0006210;GO:0006212;GO:0016491;GO:0016627;GO:0016627;GO:0017113;GO:0017113;GO:0017113;GO:0019483;GO:0051539;GO:0055114;GO:0003824;GO:0005737;GO:0005737;GO:0005829;GO:0005829;GO:0006145;GO:0006208;GO:0006208;GO:0006210;GO:0006212;GO:0006214;GO:0006248;GO:0006249;GO:0016491;GO:0016627;GO:0017113;GO:…	-	-	F	0B0RJ;14TYP;0WD8W;1DD46;0KDRJ;0V1HG;0E64X;0ISNJ	dihydropyrimidine dehydrogenase [Source:RGD Symbol;Acc:621218]	-	-
ENSRNOG00000011205	45.7713	1.19774	90.3448	75.4297	6.23706	0.00291102	0.132579	10	70869513	70871066	-	757	Ccl3	GO:0000165;GO:0000165;GO:0001649;GO:0001649;GO:0001775;GO:0001775;GO:0002548;GO:0002548;GO:0002548;GO:0004672;GO:0004672;GO:0004698;GO:0004698;GO:0005125;GO:0005576;GO:0005576;GO:0005576;GO:0005576;GO:0005615;GO:0005615;GO:0005615;GO:0005615;GO:0005737;GO:0005737;GO:0005829;GO:0005829;GO:0006468;GO:0006816;GO:0006816;GO:0006874;GO:0006874;GO:0006887;GO:0006887;GO:0006935;GO:0006935;GO:0006954;GO:…	K05408	-	T	196EQ;0UWD3;0DVHK;146RM;1D4YW;1B6KP;0J4I9;0A9HK;0VKER	C-C motif chemokine ligand 3 [Source:RGD Symbol;Acc:3647]	25542	P50229
ENSRNOG00000036726	7.84839	0.913189	14.7836	16.189	4.01694	0.00291454	0.132579	10	103599103	103619083	-	2989	Cd300e	GO:0004888;GO:0005886;GO:0016020;GO:0016021;	K06719	-	T	196YT;0B1CN;145H6;0JCED;1BAF9;0E6M7;1DDJF;0WDY0;0V1UE	Cd300e molecule [Source:RGD Symbol;Acc:1585137]	690076	D0V9T4
ENSRNOG00000015491	318.206	209.364	427.048	2.03974	1.02838	0.0029203	0.132579	1	247228061	247305693	+	2492	Rcl1	GO:0000447;GO:0000479;GO:0000480;GO:0003674;GO:0003824;GO:0003824;GO:0004521;GO:0005575;GO:0005634;GO:0005730;GO:0005730;GO:0005730;GO:0005730;GO:0005730;GO:0006396;GO:0006396;GO:0008150;GO:0042254;GO:0042254;GO:0042254;GO:0000447;GO:0000479;GO:0000480;GO:0003674;GO:0003824;GO:0003824;GO:0004521;GO:0005575;GO:0005634;GO:0005730;GO:0005730;GO:0005730;GO:0005730;GO:0005730;GO:0006396;GO:0006396;GO:…	K11108	-	A	KOG3980	RNA terminal phosphate cyclase-like 1 [Source:RGD Symbol;Acc:1305320]	309301	A0A0G2QBZ9
ENSRNOG00000031834	279.198	377.498	180.899	0.479206	-1.06128	0.00293718	0.13259	3	176444544	176465162	-	1411	Nkain4	GO:0002028;GO:0005886;GO:0016020;GO:0016020;GO:0016021;	K22735	-	U	KOG4556	Sodium/potassium transporting ATPase interacting 4 [Source:RGD Symbol;Acc:1305809]	296469	D4A8K5
ENSRNOG00000002792	97.2135	0.628643	193.798	308.28	8.2681	0.00294061	0.13259	14	18731378	18733391	-	1072	Cxcl2	GO:0001975;GO:0002237;GO:0002237;GO:0005125;GO:0005576;GO:0005576;GO:0005576;GO:0005615;GO:0005615;GO:0005615;GO:0005615;GO:0006935;GO:0006935;GO:0006935;GO:0006952;GO:0006952;GO:0006954;GO:0006954;GO:0006955;GO:0006955;GO:0007204;GO:0008009;GO:0008009;GO:0008009;GO:0008009;GO:0009408;GO:0010332;GO:0030593;GO:0030593;GO:0030595;GO:0032355;GO:0042060;GO:0045236;GO:0051384;GO:0061844;GO:0070098;GO:…	K05505	-	S;W	0DVJX;1D4WZ;0J3WE;1B6Q4;0VKBQ;13XHT;0A9A4;0UWC6	C-X-C motif chemokine ligand 2 [Source:RGD Symbol;Acc:70069]	114105	P30348
ENSRNOG00000020599	13.8051	3.45004	24.1601	7.00287	2.80795	0.00294793	0.13259	16	21273387	21274688	-	1302	Tssk6	GO:0000166;GO:0000287;GO:0000287;GO:0000287;GO:0004672;GO:0004672;GO:0004674;GO:0004674;GO:0004674;GO:0004674;GO:0004674;GO:0004674;GO:0004674;GO:0005524;GO:0005524;GO:0005524;GO:0005524;GO:0005524;GO:0005634;GO:0005737;GO:0006468;GO:0006468;GO:0006468;GO:0006468;GO:0006468;GO:0016301;GO:0016310;GO:0018105;GO:0018105;GO:0035092;GO:0035092;GO:0035556;GO:0044877;GO:0044877;	K08811	EC:2.7.11.1	T	0UGF4;0DF87;KOG0583;190VB;12RJ4;1CPXU;1B0BS;0V4VX;09TY3	testis-specific serine kinase 6 [Source:RGD Symbol;Acc:1559764]	290670	D3ZEK4
ENSRNOG00000002723	67.7566	6.36064	129.153	20.305	4.34376	0.00295135	0.13259	13	82355471	82365341	+	3514	Sele	GO:0007155;GO:0016020;GO:0002092;GO:0004888;GO:0005615;GO:0005886;GO:0005887;GO:0005901;GO:0005905;GO:0007155;GO:0007155;GO:0007155;GO:0007157;GO:0007159;GO:0007202;GO:0016020;GO:0016020;GO:0016020;GO:0016021;GO:0030029;GO:0030246;GO:0030863;GO:0033691;GO:0043274;GO:0045121;GO:0046872;GO:0048471;GO:0050901;GO:0070492;GO:0070555;	K06494	-	W;T;V	0DGZB;0UIZN;1ASJK;KOG4297;1CRPH;13KIC;18XTT;09VQR;0V6PT	selectin E [Source:RGD Symbol;Acc:3654]	25544	P98105
ENSRNOG00000060464	649.976	906.467	393.485	0.434086	-1.20395	0.00295696	0.13259	X	156363405	156379189	-	7371	Plxna3	GO:0005515;GO:0007165;GO:0007411;GO:0017154;GO:0017154;GO:0021612;GO:0021637;GO:0021766;GO:0021785;GO:0021860;GO:0048843;GO:0050919;GO:0051495;GO:0071526;GO:0097485;GO:1902287;GO:1990138;	K06820	-	-	-	plexin A3 [Source:RGD Symbol;Acc:1584973]	309280	D3ZPX4
ENSRNOG00000025689	239.505	325.343	153.667	0.472321	-1.08216	0.00299553	0.133989	6	26784058	26792808	-	5126	Abhd1	GO:0003674;GO:0005575;GO:0008126;GO:0008150;GO:0016020;GO:0016021;GO:0016787;GO:0034338;GO:0044255;GO:0047372;GO:0051792;GO:0051793;GO:0052689;	K13696	-	S;U	12T7U;0DEPN;0URWB;09TCE;1CPDD;KOG1838;191ZD;0V4BK;1B25T	abhydrolase domain containing 1 [Source:RGD Symbol;Acc:1310988]	313917	Q5RK23
ENSRNOG00000031743	358.969	92.6793	625.26	6.74648	2.75414	0.00301158	0.134377	2	248276709	248293784	+	2481	Gbp2	GO:0003924;GO:0003924;GO:0005525;GO:0005525;GO:0005634;GO:0005654;GO:0005737;GO:0005794;GO:0005829;GO:0009617;GO:0020005;GO:0031410;GO:0034504;GO:0035458;GO:0042802;GO:0042803;GO:0042832;GO:0044406;GO:0048471;GO:0050830;GO:0071222;GO:0071346;GO:0071346;GO:0071347;GO:0071356;	K20897	-	S;O;T;D;C;K	1AVYD;0UI2K;0V9BC;134KU;09XSJ;KOG2037;1CUKV;0DJTQ;194H1	guanylate binding protein 2 [Source:RGD Symbol;Acc:621810]	171164	Q63663;Q5PQW8
ENSRNOG00000038722	27.6043	11.3227	43.8858	3.87591	1.95453	0.0030228	0.134548	14	45062662	45081991	+	2349	Tlr1	GO:0001775;GO:0002224;GO:0002755;GO:0004888;GO:0005515;GO:0005794;GO:0006952;GO:0006954;GO:0006955;GO:0007165;GO:0016021;GO:0032755;GO:0032757;GO:0032760;GO:0034130;GO:0034137;GO:0035354;GO:0035663;GO:0042116;GO:0042495;GO:0042495;GO:0042802;GO:0045121;GO:0071727;	-	-	T	0UGQQ;1CT9T;09X7S;195KZ;1B3AP;13HS3;0DIJ8;0V86D;KOG4641	toll-like receptor 1 [Source:RGD Symbol;Acc:1309975]	-	-
ENSRNOG00000028259	10.4997	0.299434	20.7	69.1305	6.11125	0.00305876	0.135816	12	2213471	2217433	+	1846	Mcemp1	GO:0016020;GO:0016021;GO:0042802;	-	-	S	196BD;1D2B9;0DT07;0JDQ4;1AXK8;0A8SS;0VJX3;0UUV1;146FG	mast cell-expressed membrane protein 1 [Source:RGD Symbol;Acc:1565374]	498128	D4A545
ENSRNOG00000016414	7536.16	9801.33	5271	0.537784	-0.894901	0.00310413	0.137495	15	33569843	33576331	-	2337	Slc22a17	GO:0005887;GO:0016021;GO:0022857;GO:0031301;GO:0055085;	K08213	-	P	1ASKQ;0IRI7;13DIK;0V8IP;0DIYE;1CTPU;09XKX;0UGXC;1946G	solute carrier family 22, member 17 [Source:RGD Symbol;Acc:631405]	305886	Q9P290
ENSRNOG00000048831	291.383	184.276	398.489	2.16245	1.11267	0.00312759	0.137801	20	28815039	28819505	+	4467	Sowahc	GO:0005515;	-	-	S;E	0UQ9Q;KOG0504;1CS56;0DHF4;194VI;13JZ2;09UAA;0V742;1AU99	sosondowah ankyrin repeat domain family member C [Source:RGD Symbol;Acc:1595666]	503306	M0R7U6
ENSRNOG00000005275	49.6501	25.8126	73.4877	2.84697	1.50943	0.00313302	0.137801	10	47031050	47059216	-	2046	Shmt1	GO:0000900;GO:0000900;GO:0000900;GO:0003824;GO:0003824;GO:0004372;GO:0004372;GO:0004372;GO:0004372;GO:0004372;GO:0004372;GO:0004372;GO:0005634;GO:0005634;GO:0005654;GO:0005737;GO:0005829;GO:0005829;GO:0005829;GO:0006231;GO:0006544;GO:0006544;GO:0006545;GO:0006563;GO:0006563;GO:0006565;GO:0006565;GO:0006565;GO:0006730;GO:0006730;GO:0008270;GO:0008732;GO:0009113;GO:0009113;GO:0009113;GO:0016597;GO:…	K00600	EC:2.1.2.1	E	1CQ9V;18VIG;0UFK0;0V59M;12NMY;KOG2467;09UAI;1AVTQ;0DFK6	serine hydroxymethyltransferase 1 [Source:RGD Symbol;Acc:1312011]	287379	Q6TXG7
ENSRNOG00000014104	1101.91	1605.25	598.57	0.372883	-1.42321	0.00313374	0.137801	18	70427007	70729030	+	7747	Myo5b	GO:0003774;GO:0005515;GO:0005524;GO:0016459;GO:0051015;GO:0003774;GO:0005515;GO:0005524;GO:0016459;GO:0051015;GO:0003774;GO:0005515;GO:0005524;GO:0016459;GO:0051015;	K10357	-	Z	1CTE0;09WK7;1ARQ9;195H0;12P08;0V7IT;0DIP4;KOG0161;KOG0160;0UFVK	myosin Vb [Source:RGD Symbol;Acc:621347]	25132	P70569
ENSRNOG00000003088	414.542	276.348	552.735	2.00014	1.0001	0.00314745	0.137828	11	64601029	64714252	+	4643	Arhgap31	GO:0005096;GO:0005096;GO:0005096;GO:0007165;GO:0007165;GO:0007264;GO:0007264;GO:0007264;GO:0017124;GO:0017124;GO:0030027;GO:0030027;GO:0030027;GO:0043547;	K20646	-	T	14T4S;0V0ZE;0E5GY;0WCG4;1B9WW;1DCGW;0AZZT;196RH;0KCYW	Rho GTPase activating protein 31 [Source:RGD Symbol;Acc:1306093]	288093	D4A987
ENSRNOG00000031974	1071.16	1405.72	736.602	0.524005	-0.932348	0.00314949	0.137828	2	136993208	137014492	+	3290	Pcdh10	GO:0005509;GO:0005509;GO:0005509;GO:0005886;GO:0005886;GO:0005887;GO:0007155;GO:0007155;GO:0007155;GO:0007155;GO:0007155;GO:0007156;GO:0007156;GO:0007156;GO:0016020;GO:0016020;GO:0016020;GO:0016021;GO:0005509;GO:0005886;GO:0007155;GO:0007155;GO:0007156;GO:0007156;GO:0016020;	K16499	-	Z	KOG3594	protocadherin 10 [Source:RGD Symbol;Acc:1565811]	361943	-
ENSRNOG00000008411	613.032	414.396	811.668	1.95868	0.969881	0.00316873	0.138223	3	138715570	138757111	+	2758	Sec23b	GO:0005096;GO:0005737;GO:0005783;GO:0005783;GO:0005783;GO:0005789;GO:0005829;GO:0006886;GO:0006886;GO:0006888;GO:0006888;GO:0008270;GO:0008270;GO:0012505;GO:0012505;GO:0012507;GO:0015031;GO:0016020;GO:0016192;GO:0030127;GO:0030127;GO:0030127;GO:0031410;GO:0043547;GO:0046872;GO:0048471;GO:0048471;GO:0070971;GO:0090110;GO:0090114;GO:0090114;	K14006	-	U	KOG1986	Sec23 homolog B, coat complex II component [Source:RGD Symbol;Acc:1310699]	362226	D3ZCT7
ENSRNOG00000002802	166.463	3.69361	329.233	89.1357	6.47793	0.00317369	0.138223	14	18743685	18745457	-	926	Cxcl1	GO:0005125;GO:0005576;GO:0005576;GO:0005576;GO:0005615;GO:0005615;GO:0006935;GO:0006935;GO:0006935;GO:0006952;GO:0006952;GO:0006955;GO:0006955;GO:0007165;GO:0008009;GO:0008009;GO:0032930;GO:0060326;GO:0070965;GO:1902035;	K05505	-	S;W	0DVJX;1D4WZ;19409;0J3WE;1B6Q4;0VKBQ;13XHT;0A9A4;0UWC6	C-X-C motif chemokine ligand 1 [Source:RGD Symbol;Acc:619869]	81503	P14095
ENSRNOG00000021161	135.911	73.0803	198.742	2.7195	1.44334	0.00321032	0.139484	1	222254184	222272285	-	2455	Fermt3	GO:0002102;GO:0002102;GO:0003674;GO:0005178;GO:0005178;GO:0005178;GO:0005575;GO:0007155;GO:0007159;GO:0007159;GO:0007159;GO:0007159;GO:0007160;GO:0007229;GO:0007229;GO:0007229;GO:0007229;GO:0008150;GO:0030055;GO:0030335;GO:0030335;GO:0033622;GO:0033622;GO:0033622;GO:0033622;GO:0033632;GO:0033632;GO:0033632;GO:0033632;GO:0034446;GO:0034446;GO:0070527;GO:0070527;GO:0070527;	K17084	-	Z;D	0UN6Z;0V5AY;09Y5C;1D028;0DGY8;KOG3727;18SGF;12RPR;1B4RC	fermitin family member 3 [Source:RGD Symbol;Acc:1310168]	309186	B2GVB9
ENSRNOG00000038066	226.344	311.654	141.034	0.452535	-1.1439	0.00322551	0.139811	X	69580015	69605032	+	3903	Fam155b	-	-	-	S	1AW0N;0IKAJ;18WYF;1CW3N;0DI54;12TSI;0V7T2;0UKI2;09WV3	family with sequence similarity 155, member B [Source:RGD Symbol;Acc:1584125]	688841	D4A4E6
ENSRNOG00000050792	118.311	43.0982	193.524	4.49031	2.16682	0.00324038	0.140122	3	37545238	37564699	+	1363	Tnfaip6	GO:0003674;GO:0005540;GO:0005540;GO:0005615;GO:0005615;GO:0007155;GO:0007155;GO:0030335;GO:0030728;GO:0050728;GO:0050728;GO:0050728;	K19018	-	O;T	KOG3714;KOG1218	TNF alpha induced protein 6 [Source:RGD Symbol;Acc:621359]	84397	B0BN34
ENSRNOG00000037409	30.7713	1.21262	60.33	49.7517	5.63667	0.00326534	0.140866	10	57415832	57436368	-	1152	Scimp	GO:0001726;GO:0001726;GO:0001772;GO:0001772;GO:0001772;GO:0001772;GO:0001772;GO:0002720;GO:0002732;GO:0002732;GO:0016020;GO:0016020;GO:0016020;GO:0016021;GO:0016021;GO:0016021;GO:0030175;GO:0030175;GO:0031256;GO:0031256;GO:0031259;GO:0031259;GO:0031666;GO:0031666;GO:0032735;GO:0032735;GO:0032755;GO:0032755;GO:0032874;GO:0032874;GO:0034138;GO:0034138;GO:0034142;GO:0034142;GO:0034154;GO:0034154;GO:…	-	-	S;T	0A93G;193YH;1B6C3;0VJZV;13U6C;1D4AC;0UW04;0DUZN;0J1IN	SLP adaptor and CSK interacting membrane protein [Source:RGD Symbol;Acc:1593299]	691993	F1LYV1
ENSRNOG00000014320	207.435	28.7273	386.142	13.4417	3.74864	0.0032731	0.140867	17	51898217	51912496	-	2554	Inhba	GO:0000082;GO:0000082;GO:0000082;GO:0001541;GO:0001541;GO:0001541;GO:0001707;GO:0001707;GO:0001942;GO:0001942;GO:0001942;GO:0002244;GO:0002244;GO:0002244;GO:0002244;GO:0005102;GO:0005102;GO:0005125;GO:0005125;GO:0005125;GO:0005125;GO:0005179;GO:0005179;GO:0005179;GO:0005576;GO:0005576;GO:0005576;GO:0005576;GO:0005576;GO:0005615;GO:0005615;GO:0006357;GO:0006357;GO:0006357;GO:0007050;GO:0007050;GO:…	K04667	-	T	0V7ND;13QY5;KOG3900;09WPX;195NP;0DHZK;0UI57;1CSQ8;1B33Q	inhibin subunit beta A [Source:RGD Symbol;Acc:62074]	29200	P18331
ENSRNOG00000002800	50.7174	74.3992	27.0355	0.363385	-1.46043	0.00333119	0.142774	X	70563570	70572295	+	2969	Gdpd2	GO:0005884;GO:0005884;GO:0005886;GO:0005886;GO:0006629;GO:0006629;GO:0008081;GO:0008081;GO:0016020;GO:0016021;GO:0030027;GO:0030027;GO:0045669;GO:0045669;GO:0090527;GO:0090527;	K01124	EC:3.1.4.43	T;C	KOG2258;1B2GE;0DF5H;0V4UA;09TV3;12SSC;0UTGD;190H2;1CPV5	glycerophosphodiester phosphodiesterase domain containing 2 [Source:RGD Symbol;Acc:1560780]	302421	D3Z9K9
ENSRNOG00000008526	51.5979	85.8337	17.3622	0.202277	-2.30559	0.00333309	0.142774	8	48577952	48582353	-	2074	Pdzd3	GO:0005515;GO:0005903;GO:0006811;GO:0007168;GO:0008022;GO:0010754;GO:0030251;GO:0030251;GO:0043296;GO:0045177;GO:1990381;	K24059	-	O	13MD0;0ITA7;0VBMF;0A0R2;1CX9M;18YHC;1AXPX;0DNCH;0URP9	PDZ domain containing 3 [Source:RGD Symbol;Acc:1559807]	500986	D4A7C5
ENSRNOG00000018822	46.3309	78.8332	13.8286	0.175416	-2.51115	0.00336268	0.143271	16	20297414	20307400	+	2845	Slc5a5	GO:0005634;GO:0005886;GO:0006590;GO:0008507;GO:0015111;GO:0015705;GO:0015705;GO:0016020;GO:0016021;GO:0022857;GO:0055085;GO:0071320;GO:0071371;GO:1904200;	K14385	-	P	0V7Q3;190Y2;1CSS0;KOG2349;0DI1C;0USI7;12TWH;1B5AE;09WRQ	solute carrier family 5 member 5 [Source:RGD Symbol;Acc:69267]	114613	Q63008;F1LR66
ENSRNOG00000018109	1005.07	509.858	1500.28	2.94254	1.55706	0.00336886	0.143271	5	153568745	153625869	-	1154	Clic4	GO:0001525;GO:0001886;GO:0005244;GO:0005254;GO:0005737;GO:0005737;GO:0005739;GO:0005739;GO:0005813;GO:0005829;GO:0005886;GO:0005886;GO:0005902;GO:0005911;GO:0006811;GO:0006821;GO:0007035;GO:0009566;GO:0009986;GO:0015630;GO:0016020;GO:0016363;GO:0030216;GO:0030216;GO:0030336;GO:0030496;GO:0034220;GO:0034707;GO:0034765;GO:0035264;GO:0045177;GO:0048471;GO:0048754;GO:0061299;GO:0071277;	K05024	-	P	KOG1422;13HTJ;0DKFR;0V9Y1;1B595;1CRYR;0UIAQ;18ZDF;09Z0K	chloride intracellular channel 4 [Source:RGD Symbol;Acc:61857]	83718	Q9Z0W7
ENSRNOG00000015448	51.8951	76.5343	27.256	0.356127	-1.48954	0.00337661	0.143271	18	81569910	81590887	+	1230	Dipk1c	-	-	-	S	0DIBA;0V7YX;0UPFA;0IH7Q;18ZZX;13NRU;1AZ28;09X0S;1CT1S	divergent protein kinase domain 1C [Source:RGD Symbol;Acc:1559694]	498891	D3ZJ65
ENSRNOG00000014456	488.201	300.268	676.135	2.25178	1.17106	0.00337881	0.143271	9	61655963	61675873	+	1621	Coq10b	-	K18588	-	I	18YGY;12PAZ;09U4K;0V53P;0DFE7;KOG3177;0UPM8;1AUGJ;1CQ3Z	coenzyme Q10B [Source:RGD Symbol;Acc:1359509]	301416	Q5I0I9;A0A0G2JSW8
ENSRNOG00000017857	491.345	652.591	330.1	0.50583	-0.983276	0.003388	0.143271	9	16629401	16643182	-	5413	LOC108348250	GO:0000226;GO:0000226;GO:0005737;GO:0006511;GO:0006511;GO:0016567;GO:0016567;GO:0031467;GO:0031467;GO:0031625;GO:0031625;GO:1990393;GO:1990393;	K10613	-	O	09W77;1AWYW;1CS6K;KOG1815;18WQQ;12QKY;0V75H;0UH41;0DHGC	cullin-7 [Source:RGD Symbol;Acc:11406442]	680835	A0A0H2UHP4
ENSRNOG00000015366	20.7356	0.598868	40.8724	68.2495	6.09275	0.00339191	0.143271	9	42831742	42839837	-	1362	Neurl3	GO:0016567;GO:0061630;	K15689	EC:2.3.2.27	O	0UT31;0A549;143BT;18XFV;0DRZV;KOG4625;0VG88;1B2QE;1D221	neuralized E3 ubiquitin protein ligase 3 [Source:RGD Symbol;Acc:1359633]	316326	Q5M870
ENSRNOG00000024904	144.78	209.863	79.6967	0.379756	-1.39686	0.00340764	0.143312	3	111952348	111994337	-	4572	Pla2g4e	GO:0004620;GO:0004620;GO:0004623;GO:0004623;GO:0004623;GO:0004623;GO:0004623;GO:0005509;GO:0005509;GO:0005509;GO:0005544;GO:0005546;GO:0005546;GO:0005547;GO:0005547;GO:0005737;GO:0005737;GO:0005737;GO:0005765;GO:0005765;GO:0005829;GO:0005829;GO:0005886;GO:0005886;GO:0006629;GO:0009395;GO:0009395;GO:0010314;GO:0010314;GO:0016042;GO:0016410;GO:0016410;GO:0016410;GO:0016787;GO:0031901;GO:0031901;GO:…	K16342	EC:3.1.1.4	T;I;U	191YX;0DH2V;1ARGK;KOG1325;KOG1028;1CRT2;12TZQ;09VUK;0V6TA;0UKR4	phospholipase A2, group IVE [Source:RGD Symbol;Acc:1310595]	296091	-
ENSRNOG00000013589	625.288	825.188	425.388	0.515504	-0.955944	0.00340862	0.143312	4	149261044	149273891	+	5423	Cxcl12	GO:0001569;GO:0001666;GO:0001667;GO:0001764;GO:0001938;GO:0005125;GO:0005178;GO:0005178;GO:0005576;GO:0005576;GO:0005576;GO:0005615;GO:0005615;GO:0005634;GO:0005737;GO:0005886;GO:0006935;GO:0006935;GO:0006952;GO:0006952;GO:0006955;GO:0006955;GO:0007281;GO:0007411;GO:0007420;GO:0008009;GO:0008009;GO:0008009;GO:0008009;GO:0008009;GO:0008045;GO:0008083;GO:0008284;GO:0008285;GO:0008344;GO:0008354;GO:…	K10031	-	T;W	193EB;0J1S5;0VJPY;0UVTJ;0A8NS;1B6UX;13U89;0DV23;1D4CP	C-X-C motif chemokine ligand 12 [Source:RGD Symbol;Acc:3651]	24772	-
ENSRNOG00000021017	1116.03	1469.47	762.584	0.518951	-0.946328	0.00346116	0.145064	1	101682172	101687293	+	1332	Ca11	GO:0004089;GO:0004089;GO:0006730;GO:0008270;GO:0008270;GO:0016323;GO:0016323;GO:0016323;GO:0016836;	-	-	T;P;E	1CRAR;0UFCF;0V6BK;KOG0382;1B2QV;0DGKX;09VCF;12SDI;18XWE	carbonic anhydrase 11 [Source:RGD Symbol;Acc:735155]	308588	Q811X3
ENSRNOG00000030151	364.615	501.008	228.222	0.455526	-1.1344	0.00347601	0.145064	4	38664066	39102807	-	4932	Thsd7a	GO:0005886;GO:0005886;GO:0005886;GO:0016020;GO:0016021;GO:0031532;GO:0031532;GO:0098846;	-	-	O;W	13BI7;1BAQZ;0V2SG;0E7PT;1DEPY;0INDB;0B3HF;0WFWQ	thrombospondin type 1 domain containing 7A [Source:RGD Symbol;Acc:1566201]	500032	-
ENSRNOG00000018488	26.2202	10.6718	41.7685	3.91391	1.96861	0.00347811	0.145064	3	161519743	161534704	+	1378	Cd40	GO:0001934;GO:0001934;GO:0002376;GO:0002637;GO:0002637;GO:0002768;GO:0002768;GO:0002768;GO:0003823;GO:0003823;GO:0005515;GO:0005615;GO:0005737;GO:0005886;GO:0005886;GO:0006874;GO:0006874;GO:0006874;GO:0006954;GO:0006954;GO:0009617;GO:0009897;GO:0009897;GO:0009897;GO:0009897;GO:0009897;GO:0009986;GO:0009986;GO:0016020;GO:0016021;GO:0019724;GO:0019899;GO:0019899;GO:0019904;GO:0023035;GO:0023035;GO:…	K03160	-	T	0VFS7;0A15X;19164;1D0E0;0IY0H;1B166;13SA9;0US0P;0DSBB	CD40 molecule [Source:RGD Symbol;Acc:619830]	171369	Q4QQW2
ENSRNOG00000015741	1532.99	2045.9	1020.07	0.498593	-1.00407	0.00348217	0.145064	7	132430853	132757558	-	6219	Slc2a13	GO:0002020;GO:0002020;GO:0005366;GO:0015798;GO:0016020;GO:0016021;GO:0022857;GO:0031090;GO:0042995;GO:0044297;GO:0051117;GO:0055085;GO:0071944;GO:1902004;	K08150	-	F;J;P;G	0V4IE;1CPJQ;0UFY6;KOG0254;0DEW4;1ARSF;09TJE;12Q13;18SIV	solute carrier family 2 member 13 [Source:RGD Symbol;Acc:621814]	171147	Q921A2
ENSRNOG00000046699	56.7747	4.65885	108.89	23.3728	4.54676	0.00349049	0.145078	3	160799981	160802433	-	856	Slpi	GO:0003674;GO:0003677;GO:0003729;GO:0004866;GO:0004867;GO:0004867;GO:0005575;GO:0005576;GO:0005576;GO:0005615;GO:0005615;GO:0006955;GO:0010951;GO:0019731;GO:0019731;GO:0019899;GO:0030414;GO:0030414;GO:0032091;GO:0032496;GO:0035821;GO:0045071;GO:0045087;GO:0045087;GO:0050728;GO:0052547;	K23638	-	-	-	secretory leukocyte peptidase inhibitor [Source:RGD Symbol;Acc:621768]	84386	Q9WUQ4
ENSRNOG00000002360	835.557	1098.07	573.046	0.521867	-0.938246	0.00352759	0.146287	14	39964588	40049354	+	1737	Gabrg1	GO:0004888;GO:0004888;GO:0004890;GO:0004890;GO:0004890;GO:0005216;GO:0005216;GO:0005230;GO:0005230;GO:0005237;GO:0005254;GO:0005254;GO:0005886;GO:0005886;GO:0005887;GO:0006811;GO:0006811;GO:0006811;GO:0006821;GO:0006821;GO:0006821;GO:0007165;GO:0007214;GO:0007214;GO:0007214;GO:0007268;GO:0007268;GO:0007268;GO:0008503;GO:0016020;GO:0016020;GO:0016021;GO:0016021;GO:0016021;GO:0022851;GO:0030054;GO:…	K05186	-	T;W	18VKV;0UPC9;0DKUC;09U8T;0V57Y;KOG3642;12RN9;1AYYN;1CVP9	gamma-aminobutyric acid type A receptor gamma 1 subunit [Source:RGD Symbol;Acc:621732]	140674	P23574
ENSRNOG00000007345	526.838	728.995	324.68	0.44538	-1.16689	0.00353609	0.146306	X	116751230	116792864	-	7271	Amot	GO:0001570;GO:0001701;GO:0001702;GO:0001726;GO:0003365;GO:0005654;GO:0005884;GO:0005923;GO:0006935;GO:0008180;GO:0009897;GO:0016525;GO:0030027;GO:0030027;GO:0030036;GO:0030054;GO:0030139;GO:0030334;GO:0031410;GO:0034260;GO:0034613;GO:0034613;GO:0035329;GO:0038023;GO:0040019;GO:0042074;GO:0043532;GO:0043534;GO:0048514;GO:0051056;	K16819	-	Z	0IJU5;0V5I4;1B34E;1CQHX;18S2J;0DFUH;12NSQ;0UHAI;09UIX	angiomotin [Source:RGD Symbol;Acc:1564027]	300289	A0A0G2JX94
ENSRNOG00000031475	636.873	411.008	862.737	2.09907	1.06975	0.00355112	0.146595	5	148257642	148311645	+	5241	Col16a1	GO:0005178;GO:0007155;GO:0033622;GO:0033627;GO:0051894;GO:0071230;	K24339	-	W	1CRV0;09VWM;18WU2;KOG3544;12SNN;1AW9W;0V6V5;0DH4R;0UJ6A	collagen type XVI alpha 1 chain [Source:RGD Symbol;Acc:1310982]	366474	-
ENSRNOG00000026110	53.9028	84.6763	23.1293	0.27315	-1.87224	0.00357129	0.147094	20	47596575	47689245	+	4673	Scml4	GO:0005515;GO:0003682;GO:0005515;GO:0005634;GO:0005634;GO:0042393;GO:0045892;	K11466	-	K	13K84;0UJ0D;09VRV;KOG3766;0DH0F;0V6QS;1CRQS	Scm polycomb group protein like 4 [Source:RGD Symbol;Acc:1310898]	309859	D3ZRV1
ENSRNOG00000053562	182.074	249.377	114.77	0.460228	-1.11958	0.00361993	0.14876	X	62363757	62376143	+	2853	Arx	GO:0000981;GO:0000981;GO:0003677;GO:0003677;GO:0003677;GO:0005634;GO:0006355;GO:0006355;GO:0006357;GO:0000122;GO:0000978;GO:0000981;GO:0000981;GO:0000981;GO:0001227;GO:0001764;GO:0003677;GO:0003677;GO:0003677;GO:0003682;GO:0005634;GO:0006355;GO:0006355;GO:0007411;GO:0010628;GO:0021759;GO:0021772;GO:0021800;GO:0021831;GO:0021846;GO:0021853;GO:0030900;GO:0042127;GO:0044241;GO:0046622;GO:0072148;GO:…	K09452	-	-	-	aristaless related homeobox [Source:RGD Symbol;Acc:1562672]	317268	A6YP92
ENSRNOG00000000525	113.607	161.898	65.3152	0.403435	-1.30959	0.00364415	0.149418	20	6923489	6932786	+	2090	Pi16	GO:0005576;GO:0005576;GO:0005615;GO:0005615;GO:0061052;GO:0005576;GO:0005615;GO:0005615;GO:0061052;GO:0005576;GO:0005576;GO:0005615;GO:0005615;GO:0005615;GO:0061052;GO:0061052;	K20412	-	S;Q;T	09ZMA;1CW04;0UMPP;KOG3017;0DM4Z;18W04;132N4;0VAHZ;1AZZ0	peptidase inhibitor 16 [Source:RGD Symbol;Acc:1304760]	294312	D3ZGM7
ENSRNOG00000021817	242.604	147.88	337.329	2.2811	1.18973	0.0036539	0.149477	4	145594575	145651053	+	2944	Irak2	GO:0000166;GO:0001959;GO:0001959;GO:0001959;GO:0001959;GO:0002755;GO:0002755;GO:0003674;GO:0004672;GO:0004672;GO:0004674;GO:0005515;GO:0005524;GO:0005524;GO:0005524;GO:0005575;GO:0005634;GO:0005737;GO:0005829;GO:0005886;GO:0006468;GO:0006468;GO:0006954;GO:0006954;GO:0007165;GO:0007165;GO:0007249;GO:0007249;GO:0008150;GO:0019221;GO:0031663;GO:0031663;GO:0032088;GO:0032088;GO:0035556;GO:0042803;GO:…	K04731	EC:2.7.11.1	T	0VCW6;KOG1187;1B38V;1CYMY;18TZG;0DPNZ;0A211;0UT05;13JWZ	interleukin-1 receptor-associated kinase 2 [Source:RGD Symbol;Acc:1309584]	362418	Q4QQS0
ENSRNOG00000003348	525.234	351.933	698.536	1.98485	0.989032	0.00366759	0.149477	10	46330368	46332172	-	1668	Rasd1	GO:0003924;GO:0005525;GO:0007165;GO:0016020;GO:0016529;	K07843	-	S;J;I	0DFAM;18SFV;0V4ZN;0UTY8;1CQ0D;12QWC;09U0W;KOG0395;1B1N7	ras related dexamethasone induced 1 [Source:RGD Symbol;Acc:619727]	64455	Q9JKF8
ENSRNOG00000013376	381.248	254.85	507.645	1.99193	0.99417	0.00367442	0.149477	19	55258905	55268951	-	1697	Mvd	GO:0004163;GO:0005524;GO:0005829;GO:0008299;GO:0016831;GO:0019287;	K01597	EC:4.1.1.33	H;I	1CX3V;KOG2833;1AXDC;09XM1;0VBAH;0DN78;12SRE;0URH5;192DB	mevalonate diphosphate decarboxylase [Source:RGD Symbol;Acc:621292]	81726	Q62967
ENSRNOG00000023683	115.942	168.456	63.4284	0.376529	-1.40917	0.00367842	0.149477	10	76811759	76813386	-	1628	Nog	GO:0000122;GO:0001501;GO:0001649;GO:0001655;GO:0001657;GO:0001701;GO:0001706;GO:0001707;GO:0001837;GO:0001839;GO:0001843;GO:0003149;GO:0003151;GO:0003203;GO:0003223;GO:0005576;GO:0005615;GO:0005615;GO:0007275;GO:0007389;GO:0007411;GO:0007417;GO:0007420;GO:0007492;GO:0008045;GO:0009953;GO:0010628;GO:0010629;GO:0019955;GO:0021510;GO:0021533;GO:0021915;GO:0021983;GO:0030154;GO:0030336;GO:0030510;GO:…	K04658	-	T	195PQ;1ARD1;0VG5A;1390P;0IIR6;09WYR;0DQWR;1D00R;0UUNG	noggin [Source:RGD Symbol;Acc:3183]	25495	G3V8X8
ENSRNOG00000043215	28.9016	45.6684	12.1348	0.265715	-1.91205	0.00372616	0.15108	19	26066127	26073194	+	1513	Rtbdn	GO:0019897;GO:0019897;GO:0031362;GO:0032217;GO:0032218;GO:0033165;GO:0033165;GO:0038023;GO:1902444;GO:1902444;GO:1902444;	-	-	S	0IW20;09VE8;1B5SN;0UNY2;193ZD;1CUVB;0V9IP;0DK1F;13QDT	retbindin [Source:RGD Symbol;Acc:1308534]	304667	D3ZWD2
ENSRNOG00000029682	485.428	147.399	823.457	5.58657	2.48196	0.00380511	0.153938	20	5040337	5049166	+	1172	Clic1	GO:0005244;GO:0005247;GO:0005254;GO:0005254;GO:0005254;GO:0005254;GO:0005254;GO:0005254;GO:0005515;GO:0005634;GO:0005634;GO:0005634;GO:0005634;GO:0005635;GO:0005635;GO:0005737;GO:0005737;GO:0005737;GO:0005739;GO:0005739;GO:0005886;GO:0006749;GO:0006749;GO:0006811;GO:0006821;GO:0006821;GO:0006821;GO:0006821;GO:0006821;GO:0016020;GO:0016021;GO:0031965;GO:0034220;GO:0034707;GO:0034765;GO:0045669;GO:…	K05021	-	P	13BMJ;0E7RC;1DERC;0WFZ7;0B3JN;1BARU;0V2TF;1972E;0INGZ	chloride intracellular channel 1 [Source:RGD Symbol;Acc:1303043]	406864	Q6MG61
ENSRNOG00000007943	5.8557	0.299434	11.412	38.1118	5.25217	0.00382047	0.154011	10	86582612	86595102	+	2910	Gsdma	GO:0001786;GO:0005546;GO:0005737;GO:0005737;GO:0005829;GO:0005886;GO:0006915;GO:0006915;GO:0012501;GO:0016020;GO:0042742;GO:0048471;GO:0048471;GO:0070269;GO:0070273;	K22141	-	S	0VE97;18WGC;13M0A;1D067;0US65;0IH8H;1B03H;0DNZP;0A3EH	gasdermin A [Source:RGD Symbol;Acc:1592062]	360619	D3ZA32
ENSRNOG00000050780	141.733	86.8824	196.585	2.26265	1.17801	0.00383032	0.154011	3	11717667	11723327	-	1990	Fpgs	GO:0001889;GO:0004326;GO:0004326;GO:0004326;GO:0004326;GO:0004326;GO:0004326;GO:0004326;GO:0005524;GO:0005524;GO:0005575;GO:0005737;GO:0005739;GO:0005829;GO:0006536;GO:0006536;GO:0006760;GO:0006760;GO:0007420;GO:0009058;GO:0009058;GO:0009396;GO:0009396;GO:0009396;GO:0016874;GO:0016874;GO:0031100;GO:0046872;GO:0046901;GO:0046901;GO:0046901;	-	-	H	KOG2525;12RBD	folylpolyglutamate synthase [Source:RGD Symbol;Acc:1587713]	-	-
ENSRNOG00000005695	885.93	440.851	1331.01	3.01919	1.59416	0.0038323	0.154011	4	170856751	170860225	-	676	Mgp	GO:0001503;GO:0005509;GO:0005509;GO:0005509;GO:0005576;GO:0005576;GO:0005576;GO:0007275;GO:0030154;GO:0030500;GO:0030500;GO:0031012;GO:0031012;GO:0051216;GO:0062023;GO:0062023;	K19481	-	W	0A8WX;13TZ9;0DV9Z;0VJT6;1D4KM;0UW3Q;0IZCH	matrix Gla protein [Source:RGD Symbol;Acc:3088]	25333	P08494;Q5RK05
ENSRNOG00000007539	109.728	66.606	152.85	2.29484	1.19839	0.00384164	0.154046	6	45655954	45669148	-	3666	Rsad2	GO:0001650;GO:0003824;GO:0003824;GO:0005739;GO:0005741;GO:0005743;GO:0005783;GO:0005783;GO:0005789;GO:0005811;GO:0009615;GO:0009615;GO:0034157;GO:0034165;GO:0035710;GO:0043367;GO:0043621;GO:0045071;GO:0045071;GO:0046872;GO:0050709;GO:0051536;GO:0051536;GO:0051536;GO:0051539;GO:0051607;GO:0051607;GO:2000553;	K15045	-	T	12T31;0V8TS;18XI7;0IGZE;09XW8;1CU0T;0DJ8V;0UKZM;1AT32	radical S-adenosyl methionine domain containing 2 [Source:RGD Symbol;Acc:620495]	65190	O70600
ENSRNOG00000036834	101.565	60.8689	142.26	2.33716	1.22476	0.00386407	0.154592	7	144934610	144936803	-	1493	Gpr84	GO:0001604;GO:0004930;GO:0004930;GO:0005887;GO:0007186;GO:0007186;GO:0007218;GO:0008528;GO:0016020;GO:0016021;GO:0016021;GO:0016021;GO:0043235;	K08421	-	T	KOG3656;0DKBV;12RH3;18TUI;0V9UA;0UH8Z;1ASX2;09YWK;1CV5N	G protein-coupled receptor 84 [Source:RGD Symbol;Acc:1585277]	688730	D4ACK0
ENSRNOG00000055672	74.0809	11.7412	136.421	11.619	3.53842	0.00389275	0.154592	6	99839960	99843245	-	1007	Gpx2	GO:0004602;GO:0006979;GO:0055114;	-	-	-	-	glutathione peroxidase 2 [Source:RGD Symbol;Acc:727780]	-	-
ENSRNOG00000012886	342.482	36.5941	648.37	17.7179	4.14713	0.00389434	0.154592	7	120580743	120592095	+	1941	Maff	GO:0000978;GO:0000981;GO:0001228;GO:0001228;GO:0001701;GO:0001701;GO:0003677;GO:0003677;GO:0003677;GO:0003700;GO:0003700;GO:0005634;GO:0005634;GO:0005654;GO:0005739;GO:0006355;GO:0006355;GO:0006357;GO:0035914;GO:0035914;GO:0043565;GO:0043565;GO:0045604;GO:0045604;GO:0045604;GO:0045944;GO:0045944;GO:1990837;GO:1990837;	K09037	-	K	0VETP;13PV3;0DRIE;0UUE2;0A3YU;1AYB2;KOG4196;193BP;1CXHH	MAF bZIP transcription factor F [Source:RGD Symbol;Acc:1309531]	366960	D3ZC87
ENSRNOG00000011677	2208.26	2922.4	1494.11	0.511261	-0.967867	0.00389732	0.154592	9	60021534	60070552	+	5664	Slc39a10	GO:0002903;GO:0005385;GO:0005385;GO:0005886;GO:0005887;GO:0006882;GO:0006882;GO:0016020;GO:0016020;GO:0016020;GO:0016021;GO:0030001;GO:0030001;GO:0030890;GO:0046873;GO:0046873;GO:0050861;GO:0050861;GO:0055085;GO:0055085;GO:0071578;GO:0071578;GO:1903615;GO:0002903;GO:0002903;GO:0005385;GO:0005385;GO:0005385;GO:0005886;GO:0005886;GO:0005887;GO:0006882;GO:0006882;GO:0006882;GO:0016020;GO:0016020;GO:…	K14716	-	P	09U35;0UJDR;1CQ2I;0V527;1AUWK;KOG2693;0DFCU;18SI3;12S2U	solute carrier family 39 member 10 [Source:RGD Symbol;Acc:1307321]	363229	D4A517
ENSRNOG00000010100	178.401	110.002	246.799	2.24358	1.1658	0.00390395	0.154592	9	64077845	64096265	-	1474	Tyw5	GO:0000049;GO:0000049;GO:0005506;GO:0016706;GO:0016706;GO:0031591;GO:0031591;GO:0042803;	K18066	EC:1.14.11.42	J;T;B	KOG2132;0DG1E;1AW7Q;1CQR0;191KM;14F8A;0UKRB;09URU;0V5RA	tRNA-yW synthesizing protein 5 [Source:RGD Symbol;Acc:1311269]	301419	D3ZY75
ENSRNOG00000009946	1137.85	743.27	1532.44	2.06175	1.04387	0.0039062	0.154592	8	22750336	22774903	+	4725	Ldlr	GO:0001540;GO:0002020;GO:0005041;GO:0005041;GO:0005509;GO:0005509;GO:0005515;GO:0005764;GO:0005764;GO:0005768;GO:0005769;GO:0005769;GO:0005770;GO:0005770;GO:0005794;GO:0005886;GO:0005905;GO:0006629;GO:0006897;GO:0006898;GO:0006909;GO:0007616;GO:0007616;GO:0008203;GO:0009897;GO:0009986;GO:0009986;GO:0010628;GO:0010629;GO:0010867;GO:0010899;GO:0015914;GO:0016020;GO:0016021;GO:0016323;GO:0030169;GO:…	K12473	-	T	1DCIN;196RX;0B01R;0WCI5;0E5IS;14T6W;0V10Y;1B9XX;0KD0U	low density lipoprotein receptor [Source:RGD Symbol;Acc:2998]	300438	P35952
ENSRNOG00000031681	14.1209	24.4179	3.82398	0.156606	-2.67479	0.0039268	0.154887	16	82438682	82439441	-	645	AABR07026539.1	-	-	-	S	0VI38;0UVBR;1B5HJ;0DU3Z;0J9PY;1964F;140NG;0A78Y;1D3G6	uncharacterized LOC102553495 [Source:NCBI gene;Acc:102553495]	-	-
ENSRNOG00000021231	1381.91	1941.67	822.157	0.423428	-1.23981	0.00393066	0.154887	3	123175860	123179644	-	2496	Lzts3	GO:0014069;GO:0014069;	-	-	Z;S	0UKWB;09X32;12T7X;0DIE0;0V81H;18SGY;1CT4J;1AWCQ;0IFZY	leucine zipper tumor suppressor family member 3 [Source:RGD Symbol;Acc:631327]	280670	Q8K1Q4
ENSRNOG00000014956	116.605	72.4127	160.797	2.22056	1.15092	0.00395754	0.155008	9	81655629	81666706	+	2955	Slc11a1	GO:0001818;GO:0001819;GO:0002309;GO:0002606;GO:0002827;GO:0005384;GO:0005764;GO:0005770;GO:0005886;GO:0006826;GO:0006826;GO:0006828;GO:0006876;GO:0006879;GO:0006879;GO:0006909;GO:0006954;GO:0007035;GO:0009617;GO:0009617;GO:0010008;GO:0010628;GO:0015707;GO:0016020;GO:0016020;GO:0016020;GO:0016021;GO:0030001;GO:0030001;GO:0030670;GO:0030670;GO:0032147;GO:0032496;GO:0032729;GO:0034341;GO:0042060;GO:…	K12347	-	P	KOG1291	solute carrier family 11 member 1 [Source:RGD Symbol;Acc:1601463]	316519	P70553
ENSRNOG00000016690	917.964	630.759	1205.17	1.91067	0.934075	0.00395759	0.155008	17	57976268	57984036	-	2811	Idi1	GO:0004452;GO:0004452;GO:0004452;GO:0004452;GO:0005777;GO:0005777;GO:0006694;GO:0006695;GO:0008202;GO:0008203;GO:0008299;GO:0008299;GO:0008299;GO:0016126;GO:0016787;GO:0016787;GO:0016853;GO:0050992;	K01823	EC:5.3.3.2	Q	KOG0142;0DHUS;12RXQ;1B400;0UNMJ;0V7I1;09TJQ;1CSJF;18WS0	isopentenyl-diphosphate delta isomerase 1 [Source:RGD Symbol;Acc:621835]	89784	O35760;A0A0H2UHN2
ENSRNOG00000001520	289.272	396.442	182.102	0.45934	-1.12237	0.00395928	0.155008	3	58164931	58169521	+	2757	Dlx1	GO:0000122;GO:0000122;GO:0000977;GO:0000981;GO:0000981;GO:0000981;GO:0003677;GO:0003677;GO:0003677;GO:0003677;GO:0003682;GO:0005634;GO:0005634;GO:0005634;GO:0006355;GO:0006355;GO:0006357;GO:0009954;GO:0021544;GO:0021766;GO:0021879;GO:0021892;GO:0021893;GO:0030154;GO:0030514;GO:0042475;GO:0043524;GO:0045597;GO:0045746;GO:0045944;GO:0045944;GO:0046533;GO:0048706;GO:0048715;GO:0071560;GO:0071773;GO:…	K09314	-	K	12TFX;1B31I;1D13F;18U2A;0UNE7;0VF5U;0A3ET;KOG0850;0DRUZ	distal-less homeobox 1 [Source:RGD Symbol;Acc:1309593]	296500	G3V669
ENSRNOG00000008834	48.1143	71.7882	24.4404	0.340452	-1.55448	0.00396895	0.155053	15	82099159	82482009	-	1593	Dach1	GO:0000122;GO:0000977;GO:0000978;GO:0001227;GO:0010944;GO:0030336;GO:0045892;GO:2000279;	-	-	K	KOG3915	dachshund family transcription factor 1 [Source:RGD Symbol;Acc:1592073]	306096	-
ENSRNOG00000003515	300.659	419.073	182.244	0.434874	-1.20133	0.00398001	0.155152	13	99271366	99300579	-	1922	Ephx1	GO:0003824;GO:0033961;GO:0003824;GO:0033961;	K01253	EC:3.3.2.9	S;O	1ASKJ;12N4B;0V48J;09T9G;KOG2565;18TH3;0UGX8;1CPAK;0DEKQ	epoxide hydrolase 1 [Source:RGD Symbol;Acc:2557]	25315	P07687
ENSRNOG00000008586	27.7048	7.3148	48.0947	6.57499	2.71699	0.00402239	0.156469	7	26375866	26425108	+	2769	Aldh1l2	GO:0003824;GO:0003824;GO:0004029;GO:0005654;GO:0005737;GO:0005737;GO:0005739;GO:0006730;GO:0006730;GO:0006730;GO:0009058;GO:0009058;GO:0009258;GO:0009258;GO:0009258;GO:0016020;GO:0016021;GO:0016155;GO:0016155;GO:0016155;GO:0016155;GO:0016155;GO:0016491;GO:0016491;GO:0016491;GO:0016620;GO:0016620;GO:0016742;GO:0016742;GO:0055114;	K00289	EC:1.5.1.6	F	KOG2452	aldehyde dehydrogenase 1 family, member L2 [Source:RGD Symbol;Acc:1309458]	299699	-
ENSRNOG00000019311	184.193	61.7505	306.636	4.96572	2.312	0.00403919	0.156479	1	266053002	266059256	+	3070	Nfkb2	GO:0000978;GO:0000978;GO:0000978;GO:0000981;GO:0001228;GO:0001228;GO:0002268;GO:0002268;GO:0002467;GO:0002467;GO:0003677;GO:0003677;GO:0003677;GO:0003700;GO:0003700;GO:0005515;GO:0005515;GO:0005634;GO:0005634;GO:0005634;GO:0005634;GO:0005737;GO:0005737;GO:0005737;GO:0005737;GO:0005737;GO:0005829;GO:0005829;GO:0006355;GO:0006355;GO:0006355;GO:0006355;GO:0006357;GO:0007165;GO:0007165;GO:0007568;GO:…	K04469	-	K;E	0VD3P;KOG0504;0A3C4;18TUE;1B0KB;0UJGQ;1CTIN;0DITA;13GBI	nuclear factor kappa B subunit 2 [Source:RGD Symbol;Acc:1307189]	309452	Q5U2Z4
ENSRNOG00000013170	132.998	72.4501	193.546	2.67144	1.41762	0.00403984	0.156479	X	122724129	122781479	+	1281	Il13ra1	GO:0002639;GO:0004896;GO:0004896;GO:0004896;GO:0004923;GO:0004924;GO:0005127;GO:0005515;GO:0005575;GO:0008284;GO:0009897;GO:0016020;GO:0016020;GO:0016020;GO:0016021;GO:0016515;GO:0019221;GO:0019955;GO:0030890;GO:0035772;GO:0038165;GO:0043235;GO:0048861;	K05076	-	W;T	0IH4K;0UPWG;1CYDQ;18ZBP;1AYWF;0DPFH;0A1TB;0VCP3;13MHI	interleukin 13 receptor subunit alpha 1 [Source:RGD Symbol;Acc:628741]	252963	Q561K3
ENSRNOG00000012630	747.014	297.521	1196.51	4.02159	2.00777	0.00404935	0.156515	2	207271853	207279314	+	1669	Rhoc	GO:0000281;GO:0003924;GO:0003924;GO:0003924;GO:0005525;GO:0005525;GO:0005525;GO:0005634;GO:0005634;GO:0005856;GO:0005886;GO:0005886;GO:0005886;GO:0005938;GO:0007015;GO:0007163;GO:0007264;GO:0007264;GO:0008360;GO:0016477;GO:0019901;GO:0030335;GO:0030865;GO:0031334;GO:0031334;GO:0031410;GO:0032154;GO:0032420;GO:0032420;GO:0032956;GO:0042995;GO:0043005;GO:0043231;GO:0043297;GO:0043297;GO:0051496;GO:…	K07857	-	Z	KOG0393	ras homolog family member C [Source:RGD Symbol;Acc:1304965]	295342	-
ENSRNOG00000048932	37.5307	12.8867	62.1747	4.82471	2.27044	0.00406619	0.15682	7	142244295	142260896	-	1496	Smagp	GO:0005654;GO:0005886;GO:0030054;	-	-	U	0A8WU;0DV01;13WRM;1D4AQ;0VJT3;0J3FG;0UVXG;193RT;1B6M0	small cell adhesion glycoprotein [Source:RGD Symbol;Acc:727777]	300236	Q7TPF1
ENSRNOG00000019958	512.282	676.653	347.912	0.514166	-0.959693	0.00407448	0.15682	9	17841410	17845921	+	1686	Tmem151b	-	-	-	S	0V6QR;1CW3S;0IFXW;09VRU;0UKXD;1AWDN;0DH0E;18SSM;12S64	transmembrane protein 151B [Source:RGD Symbol;Acc:1562074]	301253	D3ZNW8
ENSRNOG00000017354	628.817	434.74	822.895	1.89284	0.920554	0.00409208	0.156924	4	71740532	71749386	+	2558	Zyx	GO:0001725;GO:0005634;GO:0005829;GO:0005886;GO:0005912;GO:0005925;GO:0005925;GO:0007160;GO:0007179;GO:0007179;GO:0007229;GO:0007229;GO:0015629;GO:0043149;GO:0045335;GO:0071346;	K06273	-	Z;T	09XN2;0UHQ8;KOG1701;1AZ7U;0DIZV;1CTR8;13N9K;0V8JU;18XKF	zyxin [Source:RGD Symbol;Acc:620698]	114636	D4A7U1
ENSRNOG00000001728	227.572	131.991	323.153	2.44831	1.29178	0.00409951	0.156924	11	73676601	73678984	-	2384	Fam43a	-	-	-	S;O	0A4QA;13J8Y;0VFJD;18VMA;1B0JS;1CUZ5;0DK5C;KOG4448;0US94	family with sequence similarity 43, member A [Source:RGD Symbol;Acc:1304790]	288031	Q4KLG0
ENSRNOG00000006908	107.083	148.235	65.9318	0.444778	-1.16884	0.00411393	0.156924	5	36681528	36683356	-	1829	Pou3f2	GO:0000978;GO:0000981;GO:0000981;GO:0001228;GO:0003677;GO:0003677;GO:0003677;GO:0003677;GO:0003700;GO:0003700;GO:0003700;GO:0005634;GO:0005634;GO:0005634;GO:0005634;GO:0005654;GO:0005667;GO:0006355;GO:0006355;GO:0006357;GO:0006357;GO:0006357;GO:0007399;GO:0007420;GO:0007420;GO:0008284;GO:0008544;GO:0010629;GO:0014002;GO:0014044;GO:0021799;GO:0021869;GO:0021979;GO:0021985;GO:0022011;GO:0030182;GO:…	K09365	-	K	1AZF5;194Q7;KOG3802;12SB4;0V6VN;0UP1U;1CXDW;0DNGH;09VX7	POU class 3 homeobox 2 [Source:RGD Symbol;Acc:61946]	29588	G3V6U5
ENSRNOG00000005307	4425.44	5743.8	3107.08	0.540945	-0.886447	0.00412913	0.156924	3	47995959	48287910	+	5854	Slc4a10	GO:0005452;GO:0005452;GO:0006811;GO:0006820;GO:0006820;GO:0008509;GO:0008509;GO:0015698;GO:0016020;GO:0016020;GO:0016020;GO:0016021;GO:0016021;GO:0016021;GO:0098656;GO:0005452;GO:0005452;GO:0006811;GO:0006820;GO:0006820;GO:0008509;GO:0008509;GO:0015698;GO:0016020;GO:0016020;GO:0016020;GO:0016021;GO:0016021;GO:0016021;GO:0098656;GO:0005452;GO:0005452;GO:0006811;GO:0006820;GO:0006820;GO:0008509;GO:…	K13861	-	P	KOG1172	solute carrier family 4 member 10 [Source:RGD Symbol;Acc:631407]	295645	Q80ZA5
ENSRNOG00000061230	2229.19	2930.78	1527.61	0.521231	-0.940006	0.00414188	0.156924	X	156909913	156928057	+	5862	L1cam	GO:0005515;GO:0005886;GO:0007160;GO:0007411;GO:0009986;GO:0016477;GO:0019904;GO:0030424;GO:0031175;GO:0043025;GO:0050808;GO:0061564;GO:0005515;GO:0016020;GO:0016021;	K06550	-	-	-	L1 cell adhesion molecule [Source:RGD Symbol;Acc:619777]	50687	Q05695
ENSRNOG00000032895	40.3311	60.6214	20.0409	0.330592	-1.59688	0.00414198	0.156924	7	14891001	14907305	+	2217	Cyp4f4	GO:0004497;GO:0005506;GO:0005506;GO:0005783;GO:0005789;GO:0008391;GO:0008391;GO:0016020;GO:0016021;GO:0016491;GO:0016705;GO:0016705;GO:0019369;GO:0020037;GO:0020037;GO:0020037;GO:0036101;GO:0036101;GO:0042361;GO:0042376;GO:0042377;GO:0043231;GO:0043231;GO:0046872;GO:0050051;GO:0050051;GO:0050051;GO:0055114;GO:0097267;GO:1905344;	K00490	EC:1.14.14.1	Q	0DIWE;1CTMR;09XIZ;KOG0157;12PPT;0UMIJ;0V8GR	cytochrome P450, family 4, subfamily f, polypeptide 4 [Source:RGD Symbol;Acc:708363]	286904	P51869
ENSRNOG00000060831	63.0096	19.9208	106.098	5.32602	2.41306	0.00414613	0.156924	2	250897969	250923744	-	3652	Clca1	GO:0003674;GO:0005229;GO:0005229;GO:0005229;GO:0005887;GO:0005902;GO:0005902;GO:0006508;GO:0006821;GO:0006821;GO:0008233;GO:0008237;GO:0016021;GO:0016021;GO:0016787;GO:0030141;GO:0030141;GO:0042589;GO:0046872;GO:0071456;	K05027	-	-	-	chloride channel accessory 1 [Source:RGD Symbol;Acc:1306258]	308015	A0A0G2JWX9
ENSRNOG00000059140	22.7533	8.93656	36.5701	4.09219	2.03287	0.00414689	0.156924	14	86781202	86796378	-	3336	Myo1g	GO:0000146;GO:0000166;GO:0001891;GO:0001891;GO:0002456;GO:0002456;GO:0003774;GO:0003774;GO:0003774;GO:0003779;GO:0005516;GO:0005524;GO:0005524;GO:0005524;GO:0005546;GO:0005546;GO:0005547;GO:0005547;GO:0005654;GO:0005737;GO:0005886;GO:0005886;GO:0005886;GO:0005886;GO:0005902;GO:0005902;GO:0005902;GO:0006887;GO:0006887;GO:0006909;GO:0006909;GO:0007015;GO:0015629;GO:0016459;GO:0016459;GO:0016459;GO:…	K10356	-	-	-	myosin IG [Source:RGD Symbol;Acc:1306016]	289785	-
ENSRNOG00000042246	77.5302	115.753	39.3073	0.33958	-1.55818	0.00416195	0.156924	5	56797502	56800759	+	3004	Tmem215	GO:0016020;GO:0016021;	-	-	S	1CYEN;0A1U5;0UI5Y;0IEYB;1B317;1911A;13GMM;0DPGD;0VCPU	transmembrane protein 215 [Source:RGD Symbol;Acc:1589861]	690918	D3ZI94
ENSRNOG00000011559	2913.58	2005.42	3821.74	1.90571	0.930325	0.00416336	0.156924	2	225005019	225036188	+	1990	Cnn3	GO:0003779;GO:0003779;GO:0003779;GO:0005515;GO:0005516;GO:0005829;GO:0005874;GO:0005884;GO:0008017;GO:0014069;GO:0015629;GO:0030425;GO:0030674;GO:0030855;GO:0030855;GO:0031032;GO:0031032;GO:0032780;GO:0043025;GO:0043197;	-	-	Z	1ASK8;1CYR7;KOG2046;0VDP2;18TGI;0URP5;0A2XZ;0DPS0;13HAN	calponin 3 [Source:RGD Symbol;Acc:71044]	54321	P37397
ENSRNOG00000058388	464.118	138.454	789.782	5.7043	2.51205	0.00418019	0.157232	1	85380088	85382569	+	1812	Zfp36	GO:0000122;GO:0000122;GO:0000165;GO:0000165;GO:0000288;GO:0000288;GO:0000289;GO:0000289;GO:0000932;GO:0003729;GO:0003729;GO:0005634;GO:0005634;GO:0005737;GO:0005737;GO:0005829;GO:0005829;GO:0006357;GO:0006402;GO:0009611;GO:0009611;GO:0010494;GO:0010837;GO:0019899;GO:0019901;GO:0019957;GO:0030014;GO:0031072;GO:0031086;GO:0032680;GO:0032703;GO:0032897;GO:0035278;GO:0035556;GO:0035925;GO:0035925;GO:…	K15308	-	-	-	zinc finger protein 36 [Source:RGD Symbol;Acc:620722]	79426	P47973;G3V8K6
ENSRNOG00000036828	1334.54	1729.86	939.227	0.54295	-0.881109	0.00424202	0.158944	7	145117951	145145376	+	1831	Pde1b	GO:0001505;GO:0001975;GO:0004114;GO:0007165;GO:0007165;GO:0007626;GO:0008081;GO:0008542;GO:0042053;GO:0042428;	K13755	EC:3.1.4.17	T	09UJP;1AXG6;0DFVA;1919P;0V5IU;0UMZS;12QGU;KOG3688;1CQIP	phosphodiesterase 1B [Source:RGD Symbol;Acc:3278]	29691	Q01066
ENSRNOG00000052129	652.199	918.939	385.458	0.41946	-1.25339	0.00424316	0.158944	16	18877257	18937562	-	4668	Nwd1	GO:0005515;GO:0005730;GO:0005829;GO:0010628;GO:0032088;	-	-	-	-	NACHT and WD repeat domain containing 1 [Source:RGD Symbol;Acc:2321209]	-	-
ENSRNOG00000014248	296.679	395.865	197.493	0.498889	-1.00321	0.00427277	0.159724	9	75021790	75528644	-	3796	Erbb4	GO:0000976;GO:0001755;GO:0004672;GO:0004713;GO:0004713;GO:0004714;GO:0005154;GO:0005524;GO:0005634;GO:0005739;GO:0006468;GO:0007165;GO:0007169;GO:0007169;GO:0007399;GO:0007416;GO:0007507;GO:0007595;GO:0007595;GO:0008284;GO:0008285;GO:0009880;GO:0014068;GO:0016021;GO:0016323;GO:0016477;GO:0018108;GO:0021551;GO:0021889;GO:0030334;GO:0042531;GO:0042531;GO:0042803;GO:0043235;GO:0043653;GO:0045165;GO:…	K05085	EC:2.7.10.1	T	12QPC;1B2KX;0V6WJ;09VY3;KOG1025;0DH6Q;1CRHP;0UMRH;194DU	erb-b2 receptor tyrosine kinase 4 [Source:RGD Symbol;Acc:620486]	59323	Q62956
ENSRNOG00000016278	10.5355	2.15928	18.9117	8.75835	3.13066	0.00429524	0.160084	19	10619220	10620671	-	282	Ccl17	GO:0002548;GO:0005125;GO:0005575;GO:0005576;GO:0005576;GO:0005576;GO:0005615;GO:0005615;GO:0006935;GO:0006954;GO:0006955;GO:0006955;GO:0007186;GO:0008009;GO:0008009;GO:0008009;GO:0008150;GO:0030593;GO:0031729;GO:0043547;GO:0045662;GO:0048020;GO:0048247;GO:0070098;GO:0070374;GO:0071346;GO:0071347;GO:0071356;	K21083	-	O	0VKMD;1D52X;1B6CZ;0DVSN;193ZA;13UJT;0UWBB;0J0QF;0A9PX	C-C motif chemokine ligand 17 [Source:RGD Symbol;Acc:619924]	117518	Q9ERE0
ENSRNOG00000020938	745.218	272.844	1217.59	4.46259	2.15788	0.00430087	0.160084	1	101511901	101514974	-	2420	Ppp1r15a	-	K14019	-	T	0USCT;1CZEM;0ITE6;12TD0;0A2QW;1AW9F;0DQCM;0VDKN;193NM	protein phosphatase 1, regulatory subunit 15A [Source:RGD Symbol;Acc:621526]	171071	Q6IN02;A0A0G2JSW4
ENSRNOG00000012439	184.027	119.532	248.522	2.07914	1.05598	0.00430877	0.160084	4	153442218	153465203	-	1992	Bid	GO:0001836;GO:0001836;GO:0001836;GO:0002931;GO:0005515;GO:0005737;GO:0005737;GO:0005737;GO:0005737;GO:0005739;GO:0005739;GO:0005739;GO:0005739;GO:0005741;GO:0005741;GO:0005741;GO:0005829;GO:0005829;GO:0005829;GO:0005829;GO:0005829;GO:0006626;GO:0006626;GO:0006915;GO:0006919;GO:0006919;GO:0006919;GO:0006919;GO:0007420;GO:0008637;GO:0008637;GO:0010918;GO:0010918;GO:0016020;GO:0016020;GO:0016020;GO:…	K04726	-	T;U	0DT0Q;1D2MG;1B5WE;0VFYP;0UU1X;1938H;0A64C;13PQP;0IVZ7	BH3 interacting domain death agonist [Source:RGD Symbol;Acc:620160]	64625	Q9JLT6;A8ASI9
ENSRNOG00000004890	329.723	435.412	224.034	0.514533	-0.958665	0.004327	0.160434	7	105353913	105592804	-	4587	Adcy8	GO:0000166;GO:0004016;GO:0004016;GO:0004016;GO:0004016;GO:0004016;GO:0005524;GO:0005886;GO:0005886;GO:0005886;GO:0006171;GO:0006171;GO:0006171;GO:0007613;GO:0007616;GO:0007626;GO:0008294;GO:0009190;GO:0009190;GO:0010255;GO:0014069;GO:0016020;GO:0016021;GO:0016323;GO:0016324;GO:0016829;GO:0016849;GO:0016849;GO:0030424;GO:0030425;GO:0031915;GO:0032793;GO:0032809;GO:0035556;GO:0035556;GO:0035774;GO:…	K08048	EC:4.6.1.1	F;C	09VH7;12SXH;0V5TX;1CYPM;0UT5W;0DEWH;1AUSG;18T4V;KOG3619	adenylate cyclase 8 [Source:RGD Symbol;Acc:2036]	29241	P40146
ENSRNOG00000019229	269.057	179.223	358.891	2.00248	1.00179	0.00434293	0.160697	1	85103519	85112619	+	1181	Fbl	GO:0000494;GO:0001094;GO:0001094;GO:0001650;GO:0001651;GO:0001652;GO:0001652;GO:0003723;GO:0003723;GO:0003723;GO:0003723;GO:0003723;GO:0005515;GO:0005634;GO:0005634;GO:0005634;GO:0005634;GO:0005654;GO:0005654;GO:0005654;GO:0005694;GO:0005730;GO:0005730;GO:0005730;GO:0005730;GO:0006364;GO:0006364;GO:0006364;GO:0008150;GO:0008168;GO:0008168;GO:0008168;GO:0008649;GO:0015030;GO:0015030;GO:0015030;GO:…	K14563	EC:2.1.1.-	A	0VAFW;09ZIX;12REI;KOG1596;18T28;0DNYC;0UFCD;1CXVU;1B1UN	fibrillarin [Source:RGD Symbol;Acc:1305542]	292747	P22509
ENSRNOG00000043300	420.512	552.527	288.498	0.522142	-0.937485	0.00435984	0.160996	5	58018039	58019836	-	952	Enho	GO:0005179;GO:0005179;GO:0005886;GO:0005886;GO:0005886;GO:0007165;GO:0016020;GO:0016021;GO:0045747;GO:0045747;GO:0045747;	-	-	S	0JEN8;146TZ	energy homeostasis associated [Source:RGD Symbol;Acc:6487582]	100912292	D3ZUG5
ENSRNOG00000021438	148.943	46.8007	251.086	5.365	2.42358	0.00439851	0.162095	7	140716113	140723714	+	1533	Tuba1c	GO:0003924;GO:0005200;GO:0005525;GO:0005874;GO:0007017;	K07374	-	-	-	tubulin, alpha 1C [Source:RGD Symbol;Acc:1307226]	300218	Q6AYZ1
ENSRNOG00000056746	48.743	26.0563	71.4298	2.74136	1.45489	0.00444116	0.163312	2	193778042	193783761	+	4683	Tchh	GO:0005509;GO:0045109;GO:0046914;	-	-	-	-	trichohyalin [Source:RGD Symbol;Acc:1309635]	-	-
ENSRNOG00000016696	361.019	76.7647	645.274	8.40587	3.0714	0.00446081	0.163312	16	75966352	76016195	+	2443	Angpt2	GO:0001525;GO:0001525;GO:0001525;GO:0001525;GO:0001666;GO:0003674;GO:0005102;GO:0005576;GO:0005615;GO:0005615;GO:0005615;GO:0005634;GO:0005886;GO:0007275;GO:0007281;GO:0009314;GO:0009612;GO:0009749;GO:0010467;GO:0010467;GO:0010812;GO:0010812;GO:0014070;GO:0014823;GO:0016525;GO:0016525;GO:0030154;GO:0030971;GO:0030971;GO:0030971;GO:0030971;GO:0030971;GO:0031100;GO:0042995;GO:0043537;GO:0043537;GO:…	K05466	-	S;W;T;E;V	1AS0K;09TS9;13CXA;1CPSF;0DF2N;KOG2579;0UG7I;18WN4;0V4RJ	angiopoietin 2 [Source:RGD Symbol;Acc:621861]	89805	O35462
ENSRNOG00000015622	78.1271	45.5716	110.683	2.42877	1.28022	0.00446915	0.163312	2	53797954	53811134	-	1993	Fbxo4	GO:0000151;GO:0000151;GO:0000209;GO:0000209;GO:0004842;GO:0004842;GO:0005515;GO:0005737;GO:0005737;GO:0007568;GO:0007568;GO:0010608;GO:0010608;GO:0016567;GO:0016567;GO:0019005;GO:0019005;GO:0019005;GO:0019725;GO:0019725;GO:0031146;GO:0031146;GO:0031146;GO:0031146;GO:0031398;GO:0031647;GO:0031647;GO:0031648;GO:0031648;GO:0032212;GO:0032212;GO:0035726;GO:0035726;GO:0042803;GO:0042803;GO:0048147;GO:…	K10291	-	O	09XZ8;0V8X0;0UG7A;0IE1X;1ARZ8;18UFK;1CU4G;12TR7;0DJC8	F-box protein 4 [Source:RGD Symbol;Acc:1307580]	310363	D3ZIH4
ENSRNOG00000008301	1020.77	399.733	1641.8	4.10724	2.03817	0.0044766	0.163312	13	90807199	90814119	-	1297	Tagln2	GO:0005515;GO:0030855;	K20526	-	Z	0VBM2;KOG2046;0DFF6;13HE5;09ZFN	transgelin 2 [Source:RGD Symbol;Acc:1310840]	304983	Q5XFX0
ENSRNOG00000042785	416.985	258.285	575.686	2.22888	1.15632	0.0044804	0.163312	5	150684133	150704117	-	3739	Sesn2	GO:0001932;GO:0001932;GO:0001932;GO:0005092;GO:0005092;GO:0005634;GO:0005634;GO:0005737;GO:0005737;GO:0005737;GO:0005739;GO:0006111;GO:0006111;GO:0006635;GO:0006635;GO:0007005;GO:0007005;GO:0009749;GO:0009749;GO:0016239;GO:0016239;GO:0016239;GO:0016684;GO:0016684;GO:0016684;GO:0030308;GO:0030308;GO:0030330;GO:0030330;GO:0030330;GO:0031588;GO:0031588;GO:0031932;GO:0031932;GO:0031932;GO:0032042;GO:…	K20394	-	S;J	KOG3746;09WFN;1ARDG;0V7E5;0DH5Z;0UTRC;18ZH0;12PWZ;1CUY2	sestrin 2 [Source:RGD Symbol;Acc:1566319]	502988	B2GUV6
ENSRNOG00000021027	988.602	1301.8	675.403	0.518822	-0.946689	0.00448537	0.163312	1	101687855	101692846	+	1702	Dbp	GO:0000977;GO:0000977;GO:0000977;GO:0000977;GO:0000978;GO:0000981;GO:0001228;GO:0001228;GO:0001889;GO:0003677;GO:0003700;GO:0003700;GO:0005634;GO:0005634;GO:0005634;GO:0005634;GO:0005634;GO:0006355;GO:0006355;GO:0006357;GO:0006357;GO:0006357;GO:0007623;GO:0007623;GO:0045944;GO:0045944;GO:0048511;GO:1990837;GO:1990837;GO:0000977;GO:0000977;GO:0003677;GO:0003700;GO:0003700;GO:0005634;GO:0005634;GO:…	K09056	-	K	14TSY;0WD3B;0V1D6;196US;0KDK1;1DCZC;1BA5Y;0E601;0B0K5	D-box binding PAR bZIP transcription factor [Source:RGD Symbol;Acc:2491]	24309	P16443
ENSRNOG00000005871	167.458	9.69169	325.225	33.5571	5.06855	0.00449469	0.163325	3	1452644	1468614	+	2040	Il1rn	GO:0005125;GO:0005125;GO:0005125;GO:0005149;GO:0005149;GO:0005149;GO:0005150;GO:0005151;GO:0005152;GO:0005152;GO:0005152;GO:0005576;GO:0005615;GO:0005615;GO:0005615;GO:0006954;GO:0006954;GO:0006955;GO:0006955;GO:0007165;GO:0034115;GO:0045352;GO:0045353;GO:0051384;GO:2000660;GO:2000660;GO:2000660;	K05481	-	W;T	13TYV;0A4QH;0VFJK;0DS6S;192T2;1D1FU;0URDG;0IZQ4;1B5Q8	interleukin 1 receptor antagonist [Source:RGD Symbol;Acc:621159]	60582	P25086
ENSRNOG00000024566	59.4237	32.8132	86.0342	2.62194	1.39063	0.00454869	0.164958	5	144162141	144176807	-	1896	Sh3d21	GO:0005515;	K23715	-	T	0VFSH;1D12S;0DF5D;1AVVG;13RES;KOG4348;0URPF;0A5IV;194GD	SH3 domain containing 21 [Source:RGD Symbol;Acc:1305090]	362598	B1WC96;F6PUS4
ENSRNOG00000009912	109.902	28.69	191.114	6.66136	2.73582	0.00456365	0.165007	5	151172206	151199745	+	2628	Fgr	GO:0000166;GO:0001784;GO:0001784;GO:0001784;GO:0001784;GO:0001819;GO:0001819;GO:0001819;GO:0002376;GO:0004672;GO:0004672;GO:0004713;GO:0004713;GO:0004713;GO:0004713;GO:0004713;GO:0004713;GO:0004714;GO:0004715;GO:0004715;GO:0004715;GO:0004715;GO:0004715;GO:0005102;GO:0005515;GO:0005515;GO:0005524;GO:0005524;GO:0005524;GO:0005737;GO:0005739;GO:0005743;GO:0005758;GO:0005829;GO:0005829;GO:0005856;GO:…	K08891	EC:2.7.10.2	T	09UFI;1CY48;1B3P8;190WU;0DFI9;12R0Y;0UHW7;KOG0197;0V649	FGR proto-oncogene, Src family tyrosine kinase [Source:RGD Symbol;Acc:621319]	79113	Q6P6U0
ENSRNOG00000005923	1971.21	1377.37	2565.04	1.86227	0.897065	0.00457134	0.165007	8	12284528	12333316	+	2269	Mtmr2	GO:0002091;GO:0004438;GO:0004438;GO:0004438;GO:0004438;GO:0004438;GO:0004725;GO:0004725;GO:0005515;GO:0005634;GO:0005634;GO:0005737;GO:0005737;GO:0005737;GO:0005737;GO:0005774;GO:0005774;GO:0005829;GO:0005829;GO:0005829;GO:0006629;GO:0008021;GO:0014069;GO:0016020;GO:0016311;GO:0016311;GO:0016311;GO:0016311;GO:0016791;GO:0016791;GO:0030424;GO:0030425;GO:0031642;GO:0031642;GO:0032288;GO:0032288;GO:…	K18081	-	S;Z;I;U	09V1P;0DGB0;0V61A;1919N;1CR0F;1B0PR;KOG1089;0UQYM;12P82	myotubularin related protein 2 [Source:RGD Symbol;Acc:1311865]	315422	D3ZA31
ENSRNOG00000013408	863.006	1131.57	594.441	0.525323	-0.928723	0.00457724	0.165007	9	45901741	46081880	+	4273	Npas2	GO:0003677;GO:0003700;GO:0005634;GO:0005634;GO:0005654;GO:0005667;GO:0005667;GO:0005737;GO:0005829;GO:0006355;GO:0045739;GO:0045893;GO:0045944;GO:0046983;GO:0051775;GO:0051879;GO:0060548;GO:1990837;GO:2001020;	K09026	-	K	0B4G2;1DF9F;1BB0B;0V35J;19779;0E8AS;0WGZ2;13D2V;0IQ5V	neuronal PAS domain protein 2 [Source:RGD Symbol;Acc:1309681]	316351	F1MAG2
ENSRNOG00000016538	174.607	265.312	83.9029	0.316243	-1.6609	0.00464626	0.167164	17	79321900	79676499	-	5857	Itga8	GO:0001656;GO:0001656;GO:0001822;GO:0001822;GO:0003674;GO:0005783;GO:0005783;GO:0005886;GO:0007155;GO:0007155;GO:0007155;GO:0007160;GO:0007160;GO:0007229;GO:0007420;GO:0007613;GO:0007613;GO:0008305;GO:0008305;GO:0009986;GO:0009986;GO:0014069;GO:0016020;GO:0030030;GO:0030030;GO:0030198;GO:0030198;GO:0030511;GO:0030511;GO:0032591;GO:0034446;GO:0034446;GO:0042472;GO:0042472;GO:0043204;GO:0045177;GO:…	K06584	-	W	18UAE;09T5M;0V44B;1CS57;KOG3637;0UMSX;12N24;1AX9B;0DEGR	integrin subunit alpha 8 [Source:RGD Symbol;Acc:621634]	364786	B5DEG1
ENSRNOG00000010208	3210.33	153.726	6266.93	40.7669	5.34933	0.00466575	0.167534	X	1364786	1369384	-	740	Timp1	GO:0002248;GO:0005125;GO:0005515;GO:0005604;GO:0005615;GO:0008191;GO:0008191;GO:0008270;GO:0008284;GO:0010951;GO:0030414;GO:0031012;GO:0043086;GO:0051045;GO:0071492;GO:1901164;GO:1905049;GO:2001044;	K16451	-	O;W	13TYM;0DQST;0VE85;0A3XX;19004;1B53V;0UU4B;1D0Q5;KOG4745	TIMP metallopeptidase inhibitor 1 [Source:RGD Symbol;Acc:621675]	116510	P30120
ENSRNOG00000008165	76.9287	45.1644	108.693	2.40661	1.267	0.00470383	0.168569	3	148327965	148370187	+	3287	Tpx2	GO:0000922;GO:0000922;GO:0000922;GO:0005634;GO:0005654;GO:0005737;GO:0005819;GO:0005819;GO:0005819;GO:0005819;GO:0005856;GO:0005874;GO:0005874;GO:0005880;GO:0007020;GO:0007020;GO:0007026;GO:0007026;GO:0007049;GO:0008017;GO:0015630;GO:0019901;GO:0019901;GO:0019901;GO:0030295;GO:0032147;GO:0032147;GO:0032147;GO:0032147;GO:0043203;GO:0043203;GO:0045171;GO:0051301;GO:0060236;GO:0060236;GO:0060236;GO:…	K16812	-	Z	09WN2;0IIEY;190I3;0DHXK;13HQ9;1AZT1;0UQI8;1CSNB;0V7KN	TPX2, microtubule nucleation factor [Source:RGD Symbol;Acc:1311894]	311546	D3ZA78
ENSRNOG00000033617	157.877	213.699	102.054	0.477561	-1.06624	0.00475384	0.169395	10	87238723	87248632	-	2648	Krt26	GO:0005198;GO:0005198;GO:0005882;GO:0005198;GO:0005198;GO:0005882;	K07604	-	Z	0JA2D;1CYEX;140UR;1B31H;0A3M3;0DPGM;0USUB;0VEG4	keratin 26 [Source:RGD Symbol;Acc:1303322]	407758	Q6IFW9
ENSRNOG00000000081	88.0184	40.7398	135.297	3.32101	1.73162	0.00475954	0.169395	14	13192347	13274978	+	1467	Antxr2	GO:0016021;GO:0038023;	K20909	-	W;T	0DEQM;09TDC;0UT6T;1B3I4;0IK1W;18W49;13I6B;0V4CF;1CPEB	ANTXR cell adhesion molecule 2 [Source:RGD Symbol;Acc:1561294]	305633	-
ENSRNOG00000017679	156.446	222.005	90.8873	0.409392	-1.28844	0.00476006	0.169395	1	170262156	170272298	+	2207	Cckbr	GO:0001696;GO:0004930;GO:0004930;GO:0004930;GO:0004951;GO:0005886;GO:0007165;GO:0007186;GO:0007186;GO:0007186;GO:0007200;GO:0007204;GO:0008284;GO:0015054;GO:0015054;GO:0015054;GO:0016020;GO:0016020;GO:0016021;GO:0016021;GO:0016021;GO:0017046;GO:0031741;GO:0038188;GO:0045851;GO:0048565;GO:0048732;GO:0004930;GO:0004930;GO:0007186;GO:0007186;GO:0015054;GO:0015054;GO:0016020;GO:0016021;GO:0016021;GO:…	K04195	-	T	KOG3656;0DKXD;0VBAF;1CWX9;1AYVX;0UJFM;12Q94;18ZUP;0A0E7	cholecystokinin B receptor [Source:RGD Symbol;Acc:2290]	25706	P30553
ENSRNOG00000005335	192.039	259.628	124.449	0.479336	-1.06089	0.00476859	0.169395	3	40038336	40624530	+	2184	Galnt13	GO:0004653;GO:0004653;GO:0006493;GO:0018242;GO:0018243;	K00710	EC:2.4.1.41	O	0V43X;09T56;KOG3736;1B3Y0;1CP61;0DEGC;0UFE7;12N1X	polypeptide N-acetylgalactosaminyltransferase 13 [Source:RGD Symbol;Acc:735044]	311039	Q6UE39
ENSRNOG00000003453	518.148	790.739	245.557	0.310541	-1.68714	0.0047734	0.169395	13	42219887	42263024	-	2011	Lypd1	GO:0001662;GO:0007271;GO:0016020;GO:0030550;GO:0033130;GO:0035094;GO:0095500;GO:1903077;	-	-	S	19332;1B5G7;0VHJ4;0A6R8;0UUY4;0IWWH;1D2ZS;0DTQR;13QQK	Ly6/Plaur domain containing 1 [Source:RGD Symbol;Acc:1549754]	360838	Q66H42
ENSRNOG00000036673	8.5953	1.26467	15.9259	12.5929	3.65454	0.00478761	0.169569	10	110251363	110259985	-	1160	Sectm1b	GO:0005125;GO:0005125;GO:0006955;GO:0006955;GO:0006955;GO:0007165;GO:0016020;GO:0016021;GO:0016021;GO:0016021;	-	-	-	-	secreted and transmembrane 1B [Source:RGD Symbol;Acc:735132]	287884	E9PTB4
ENSRNOG00000056786	404.797	175.759	633.835	3.60628	1.85051	0.00481243	0.170117	19	55305496	55367353	-	8203	Piezo1	GO:0005783;GO:0008381;GO:0010831;GO:0016021;GO:0033625;GO:0033634;	K22128	-	-	-	piezo-type mechanosensitive ion channel component 1 [Source:RGD Symbol;Acc:1308822]	361430	Q0KL00
ENSRNOG00000031211	38.0281	62.4724	13.5838	0.217437	-2.20133	0.00483181	0.170471	1	189233141	189272172	+	3618	Acsm5	GO:0000166;GO:0000166;GO:0003674;GO:0004321;GO:0005524;GO:0005525;GO:0005575;GO:0005739;GO:0005759;GO:0005759;GO:0006629;GO:0006631;GO:0006633;GO:0006637;GO:0008150;GO:0015645;GO:0016874;GO:0031956;GO:0031956;GO:0046872;GO:0047760;	K01896	EC:6.2.1.2	I	18WKR;0DF8B;KOG1175;0V9V8;13HY5;1CPXY;0UKDN;09YXJ;1AXQF	acyl-CoA synthetase medium-chain family member 5 [Source:RGD Symbol;Acc:1309578]	361637	Q6AYT9
ENSRNOG00000018484	202.164	96.2878	308.041	3.19917	1.6777	0.00488618	0.171674	5	135997725	136002900	-	2389	Plk3	GO:0000082;GO:0000122;GO:0000302;GO:0002039;GO:0004672;GO:0004674;GO:0004674;GO:0005515;GO:0005524;GO:0005634;GO:0005730;GO:0005737;GO:0005795;GO:0005813;GO:0006468;GO:0006970;GO:0006974;GO:0009314;GO:0031122;GO:0032465;GO:0043066;GO:0051302;GO:0090166;GO:0090316;GO:1904716;GO:2000777;	K08862	EC:2.7.11.21	D;B	0DJU6;0V605;0UNZU;09V0D;1AYZW;1CUMA;KOG0575;12PB0;18ZVH	polo-like kinase 3 [Source:RGD Symbol;Acc:62039]	58936	Q9R011
ENSRNOG00000004649	49.8272	4.02651	95.6278	23.7495	4.56983	0.00488836	0.171674	3	121876263	121882726	-	1396	Il1b	GO:0000165;GO:0000187;GO:0001660;GO:0001934;GO:0005125;GO:0005125;GO:0005125;GO:0005125;GO:0005125;GO:0005149;GO:0005149;GO:0005149;GO:0005178;GO:0005576;GO:0005576;GO:0005576;GO:0005576;GO:0005615;GO:0005615;GO:0005615;GO:0005615;GO:0005615;GO:0005737;GO:0005764;GO:0005829;GO:0006954;GO:0006954;GO:0006954;GO:0006954;GO:0006955;GO:0006955;GO:0008284;GO:0008285;GO:0009743;GO:0010573;GO:0010575;GO:…	K04519	-	T;V	0DRYM;1CWH6;18TT7;0VFAB;0UPAA;13ME0;0IGSZ;1ASW1;0A43M	interleukin 1 beta [Source:RGD Symbol;Acc:2891]	24494	Q5BKB0
ENSRNOG00000059765	741.887	966.093	517.681	0.535851	-0.900097	0.0048942	0.171674	7	141326321	141354937	+	4235	Asic1	GO:0001662;GO:0001975;GO:0005216;GO:0005261;GO:0005272;GO:0005272;GO:0005272;GO:0005794;GO:0005886;GO:0005886;GO:0005887;GO:0005887;GO:0005887;GO:0005887;GO:0006811;GO:0006812;GO:0006814;GO:0006814;GO:0006814;GO:0006816;GO:0007613;GO:0008306;GO:0009986;GO:0010447;GO:0015280;GO:0015280;GO:0015280;GO:0016020;GO:0016020;GO:0016020;GO:0016021;GO:0016021;GO:0016021;GO:0016021;GO:0019233;GO:0022839;GO:…	K04829	-	-	-	acid sensing ion channel subunit 1 [Source:RGD Symbol;Acc:71062]	79123	P55926
ENSRNOG00000057347	62.9095	30.7283	95.0907	3.09457	1.62974	0.00494419	0.172869	3	164424515	164425910	+	1396	Cebpb	GO:0000122;GO:0000779;GO:0000779;GO:0000785;GO:0000785;GO:0000976;GO:0000976;GO:0000976;GO:0000977;GO:0000977;GO:0000978;GO:0000978;GO:0000978;GO:0000978;GO:0000979;GO:0000979;GO:0000981;GO:0000981;GO:0000981;GO:0000981;GO:0001227;GO:0001228;GO:0001228;GO:0001228;GO:0001541;GO:0001541;GO:0001541;GO:0001889;GO:0001892;GO:0001892;GO:0002432;GO:0003677;GO:0003677;GO:0003677;GO:0003682;GO:0003682;GO:…	K10048	-	-	-	CCAAT/enhancer binding protein beta [Source:RGD Symbol;Acc:2327]	24253	P21272
ENSRNOG00000002610	1252.23	796.608	1707.85	2.1439	1.10024	0.00494855	0.172869	10	7041510	7055101	+	3027	Carhsp1	GO:0000177;GO:0000177;GO:0000177;GO:0000932;GO:0003676;GO:0003676;GO:0003723;GO:0003730;GO:0003730;GO:0003730;GO:0003730;GO:0005737;GO:0005737;GO:0005737;GO:0005829;GO:0005829;GO:0005829;GO:0043186;GO:0043186;GO:0043186;GO:0043488;GO:0043488;GO:0043488;GO:0043488;	-	-	J;K	1D360;0DTTV;0VHGT;0A6V3;0UV81;1B5IC;KOG3070;13R8D;192UW	calcium regulated heat stable protein 1 [Source:RGD Symbol;Acc:708415]	260416	Q9WU49
ENSRNOG00000017359	9044.83	11694.4	6395.29	0.546869	-0.870733	0.00495674	0.172869	9	92916469	92930279	+	1921	Itm2c	GO:0001540;GO:0005524;GO:0005764;GO:0005764;GO:0005794;GO:0005886;GO:0010977;GO:0030182;GO:0048471;GO:2001238;	K18265	-	S	18ZTI;0DGZ9;KOG4681;1AYWX;12PF0;1CRPF;09VQN;0V6PP;0UIYQ	integral membrane protein 2C [Source:RGD Symbol;Acc:1309503]	301575	Q5PQL7
ENSRNOG00000015318	342.265	451.178	233.353	0.517207	-0.951186	0.00497188	0.173065	5	140923914	140940905	+	4658	Heyl	GO:0000122;GO:0000122;GO:0000978;GO:0000978;GO:0000978;GO:0000981;GO:0000981;GO:0000981;GO:0001227;GO:0001227;GO:0001227;GO:0001228;GO:0001228;GO:0003151;GO:0003151;GO:0003181;GO:0003181;GO:0003184;GO:0003184;GO:0003198;GO:0003198;GO:0003203;GO:0003203;GO:0003208;GO:0003208;GO:0003677;GO:0003677;GO:0003700;GO:0003700;GO:0005634;GO:0005634;GO:0005634;GO:0005737;GO:0005737;GO:0006355;GO:0006355;GO:…	K09091	-	K	09UFB;13JPZ;0UH61;0V5EP;KOG4304;18S83;1AXEH;0DFBU;1CQEP	hes-related family bHLH transcription factor with YRPW motif-like [Source:RGD Symbol;Acc:1305022]	313575	D3ZIH3
ENSRNOG00000013140	724.092	946.742	501.443	0.529651	-0.916886	0.00498285	0.173116	2	62399748	62634785	-	8289	Pdzd2	GO:0005515;GO:0005737;GO:0005829;GO:0005886;GO:0034451;GO:0043231;	K24058	-	O;W;T	0DG9W;0UJC6;KOG3528;0VCM9;1398J;18ZA9;1CYBP;1AUVD;0A1RN	PDZ domain containing 2 [Source:RGD Symbol;Acc:619958]	65034	Q9QZR8
ENSRNOG00000056092	8.61344	1.21262	16.0143	13.2063	3.72315	0.0050261	0.173866	8	13614800	13680870	-	3399	Hephl1	GO:0004322;GO:0004322;GO:0004322;GO:0005507;GO:0005507;GO:0005886;GO:0006811;GO:0006826;GO:0006879;GO:0006879;GO:0016020;GO:0016021;GO:0016491;GO:0016491;GO:0016491;GO:0016491;GO:0046872;GO:0055072;GO:0055114;	K14735	EC:1.16.3.1	-	-	hephaestin-like 1 [Source:RGD Symbol;Acc:1564835]	500946	-
ENSRNOG00000018421	270.943	181.544	360.342	1.98487	0.989046	0.00504459	0.173866	1	140584380	140593745	+	2373	Aen	GO:0003676;GO:0003676;GO:0004518;GO:0004527;GO:0004527;GO:0004527;GO:0004527;GO:0005634;GO:0005634;GO:0005654;GO:0005654;GO:0005654;GO:0005730;GO:0005730;GO:0006915;GO:0006974;GO:0010212;GO:0010212;GO:0010212;GO:0016787;GO:0031965;GO:0042771;GO:0042771;GO:0042771;GO:0042771;GO:0090305;	K18340	EC:3.1.-.-	L	13MVV;0DP42;1CZQR;KOG2249;18S7A;0A30D;0UTK6;0VDVH;1B0D2	apoptosis enhancing nuclease [Source:RGD Symbol;Acc:1305051]	361594	B2GUW6
ENSRNOG00000030475	110.132	150.309	69.9562	0.465417	-1.1034	0.00504465	0.173866	X	110404022	110411039	+	4072	Pwwp3b	-	K23386	-	S	1CVA7;0IKQG;18VG8;1B31S;09Z0U;0V9YE;0DKG5;0UPDV;13EUE	PWWP domain containing 3B [Source:RGD Symbol;Acc:1565148]	501630	B5DEG0
ENSRNOG00000000894	2279.77	2949	1610.54	0.546133	-0.872677	0.00504689	0.173866	12	5573729	5822874	-	11182	Fry	GO:0000902;GO:0000902;GO:0000902;GO:0004857;GO:0005938;GO:0030427;GO:0031175;GO:0043086;GO:1904428;GO:0000902;GO:0000902;GO:0004857;GO:1904428;GO:0000902;	-	-	S	0DMBN;KOG1825;09ZTF;12QYI;1CW6T;0V7IK	FRY microtubule binding protein [Source:RGD Symbol;Acc:1307034]	304244	C0IXW5
ENSRNOG00000056219	134.15	22.3701	245.93	10.9937	3.4586	0.00505219	0.173866	4	163239849	163261958	-	3776	Olr1	GO:0016020;GO:0016021;	K08763	-	-	-	oxidized low density lipoprotein receptor 1 [Source:RGD Symbol;Acc:620515]	140914	O70156;A0A0G2K1K0
ENSRNOG00000020391	235.457	157.251	313.664	1.99467	0.996147	0.00509318	0.174946	19	39257586	39259728	+	1178	Nip7	GO:0003723;GO:0005634;GO:0005654;GO:0005730;GO:0005829;GO:0042255;	K07565	-	J	0DPDE;KOG3492;18XBT;12TZT;1CYBA;0VCKZ;1AZM8;0USR8;0A1R6	nucleolar pre-rRNA processing protein NIP7 [Source:RGD Symbol;Acc:620069]	192180	Q9WV50
ENSRNOG00000011589	2601.55	3503.79	1699.31	0.484993	-1.04396	0.00513598	0.175434	2	230901126	231132039	+	4012	Camk2d	GO:0004672;GO:0004683;GO:0005516;GO:0005524;GO:0006468;GO:0004672;GO:0004683;GO:0005516;GO:0005524;GO:0006468;GO:0004672;GO:0004683;GO:0005516;GO:0005524;GO:0006468;	K04515	EC:2.7.11.17	T	1AZN8;0UFT0;194Y9;KOG0033;0DI02;09W2C;1CSQS;0V70H;12PNB	calcium/calmodulin-dependent protein kinase II delta [Source:RGD Symbol;Acc:2263]	24246	P15791
ENSRNOG00000004040	185.164	259.513	110.816	0.427015	-1.22764	0.00513609	0.175434	10	98237141	98294522	-	4866	Abca8	GO:0000166;GO:0003674;GO:0005319;GO:0005524;GO:0005524;GO:0005524;GO:0005575;GO:0005783;GO:0005783;GO:0005886;GO:0006686;GO:0006686;GO:0006869;GO:0008150;GO:0008559;GO:0008559;GO:0010874;GO:0010874;GO:0010875;GO:0010875;GO:0016020;GO:0016021;GO:0016021;GO:0016021;GO:0016323;GO:0016323;GO:0016887;GO:0042626;GO:0042626;GO:0042626;GO:0042626;GO:0042626;GO:0042908;GO:0042908;GO:0043231;GO:0055085;GO:…	K05650	-	Q	0V4GH;12P2M;KOG0059;0DG5X;194IQ;09THI;1AWAC;1CQVH;0UHWM	ATP binding cassette subfamily A member 8 [Source:RGD Symbol;Acc:1307069]	303637	-
ENSRNOG00000022707	48.6744	7.01716	90.3316	12.873	3.68627	0.00513629	0.175434	2	93827504	93831419	+	1347	Pmp2	GO:0005504;GO:0005504;GO:0005737;GO:0008289;GO:0008289;GO:0015485;GO:0015485;GO:0043209;GO:0043209;GO:0061024;GO:0061024;GO:0061024;GO:0061024;	K24977	-	I	1964B;13PZ6;0DTR9;KOG4015;0VHJR;0UV3H;0A6RS;1D336;1B5J6	peripheral myelin protein 2 [Source:RGD Symbol;Acc:1585218]	688790	D3ZFG5
ENSRNOG00000010897	812.433	570.288	1054.58	1.8492	0.886902	0.00519986	0.177036	3	22811927	22888598	+	2360	Nek6	GO:0000166;GO:0000287;GO:0001222;GO:0004672;GO:0004672;GO:0004674;GO:0004674;GO:0005524;GO:0005524;GO:0005524;GO:0005524;GO:0005634;GO:0005654;GO:0005737;GO:0005737;GO:0005813;GO:0005829;GO:0006468;GO:0006468;GO:0006468;GO:0007059;GO:0016301;GO:0016310;GO:0018105;GO:0019894;GO:0019901;GO:0030071;GO:0031625;GO:0032991;GO:0033613;GO:0034451;GO:0046777;GO:0000166;GO:0004672;GO:0004672;GO:0004674;GO:…	K20875	EC:2.7.11.1	T;D	0UMFJ;12QIW;1CTJB;0V8EI;KOG0591;0DIU0;18XAC;1AYVS;09XGG	NIMA-related kinase 6 [Source:RGD Symbol;Acc:727779]	360161	P59895;B1H218
ENSRNOG00000024207	194.259	127.554	260.964	2.04591	1.03274	0.00521536	0.177036	14	2018500	2032593	-	4385	Fgfrl1	GO:0000139;GO:0001501;GO:0001501;GO:0003179;GO:0003179;GO:0005007;GO:0005007;GO:0005007;GO:0005007;GO:0005794;GO:0005794;GO:0005794;GO:0005886;GO:0005886;GO:0005886;GO:0005886;GO:0005886;GO:0008201;GO:0008201;GO:0008285;GO:0008285;GO:0008543;GO:0016020;GO:0016021;GO:0017134;GO:0017134;GO:0017134;GO:0030133;GO:0030133;GO:0030658;GO:0031410;GO:0042802;GO:0042802;GO:0044291;GO:0044291;GO:0060412;GO:…	-	-	T	0A3G3;KOG0200;0US2A;13HBG;1911I;0DR3B;0VEB2;1B4AZ;1CYBE	fibroblast growth factor receptor-like 1 [Source:RGD Symbol;Acc:735156]	360903	Q7TQM3
ENSRNOG00000016166	187.016	80.665	293.367	3.63686	1.86269	0.00521579	0.177036	1	259308296	259357056	-	1471	Pdlim1	GO:0001725;GO:0003713;GO:0005515;GO:0005667;GO:0005737;GO:0005856;GO:0005856;GO:0006357;GO:0030018;	K23353	-	Z;T	1AU0J;0V87K;KOG1703;13CT0;1CTB9;0UM5E;195TH;09X91;0DIKF	PDZ and LIM domain 1 [Source:RGD Symbol;Acc:68324]	54133	P52944
ENSRNOG00000000196	40.9933	67.1811	14.8056	0.220383	-2.18192	0.00522211	0.177036	8	58744849	58772408	-	2863	Cyp19a1	GO:0002677;GO:0005506;GO:0005783;GO:0006710;GO:0008209;GO:0008585;GO:0010760;GO:0016705;GO:0016712;GO:0020037;GO:0020037;GO:0030540;GO:0030879;GO:0055114;GO:0060065;GO:0060736;GO:0061370;GO:0070330;GO:2000866;	K07434	EC:1.14.14.14	Q	0A31Z;1CYRF;1AWBD;0VDX3;18X96;0UPRK;0DPSB;KOG0157;12TCU	cytochrome P450, family 19, subfamily a, polypeptide 1 [Source:RGD Symbol;Acc:2457]	25147	-
ENSRNOG00000011823	34.2594	13.1752	55.3436	4.20059	2.07059	0.00526971	0.178318	9	25410669	25440411	+	5743	Tfap2b	GO:0003700;GO:0005634;GO:0006355;GO:0000122;GO:0000122;GO:0000977;GO:0000978;GO:0000978;GO:0000978;GO:0000981;GO:0000981;GO:0000981;GO:0000981;GO:0000987;GO:0000987;GO:0001228;GO:0001228;GO:0001228;GO:0001822;GO:0001822;GO:0003091;GO:0003091;GO:0003682;GO:0003700;GO:0003700;GO:0003700;GO:0003700;GO:0005634;GO:0005634;GO:0005634;GO:0005634;GO:0005634;GO:0005634;GO:0006006;GO:0006006;GO:0006355;GO:…	K09176	-	K	18YC6;0UHTE;KOG3811;1CQV5;12NZG;1ATHI;0DERM;0V4DR;09TEJ	transcription factor AP-2 beta [Source:RGD Symbol;Acc:1306321]	301285	D4A505
ENSRNOG00000014241	1139.46	771.269	1507.66	1.95478	0.967003	0.00528651	0.178326	5	156215417	156318671	+	4656	Ece1	GO:0001921;GO:0004175;GO:0004222;GO:0004222;GO:0004222;GO:0005768;GO:0006508;GO:0006508;GO:0006508;GO:0007507;GO:0008233;GO:0008237;GO:0008237;GO:0008237;GO:0008270;GO:0009897;GO:0010814;GO:0010815;GO:0010816;GO:0016020;GO:0016021;GO:0016021;GO:0016485;GO:0016486;GO:0016787;GO:0033093;GO:0034959;GO:0042447;GO:0042733;GO:0042803;GO:0043583;GO:0046872;GO:0048471;GO:0060037;GO:0004222;GO:0004222;GO:…	K01415	EC:3.4.24.71	E	1CTV4;KOG3624;18ZFA;09UPT;0V5PD;1B0YA;0DJ3A;12PKS;0UKZ6	endothelin converting enzyme 1 [Source:RGD Symbol;Acc:620293]	94204	Q6IN10
ENSRNOG00000042731	445.982	625.449	266.514	0.426117	-1.23068	0.00529371	0.178326	4	153330069	153350446	+	1964	Slc25a18	GO:0005313;GO:0005739;GO:0005743;GO:0015183;GO:0015293;GO:0015810;GO:0015813;GO:0016020;GO:0016021;GO:0022857;GO:0043490;GO:0055085;GO:0055085;GO:0070778;	K15107	-	C	0DJDJ;18VKE;1AV6J;1CU5V;KOG0750;0USP5;0V5W4;09Y0H;12U0A	solute carrier family 25 member 18 [Source:RGD Symbol;Acc:1590470]	681896	Q505J6
ENSRNOG00000005347	663.482	870.142	456.823	0.524999	-0.929614	0.00530682	0.178326	3	92288818	92290919	-	2102	Fjx1	GO:0005615;GO:0005615;GO:0005615;GO:0007267;GO:0010842;GO:0010842;	K16674	-	S	12U1K;1ATYK;1CYDP;0DPFG;0A1TA;194RT;0IHNI;0UQMW;0VCP2	four-jointed box kinase 1 [Source:RGD Symbol;Acc:1306113]	366140	D4AB25
ENSRNOG00000008246	213.307	134.451	292.162	2.173	1.11969	0.00531203	0.178326	6	26821255	26828972	-	3836	Emilin1	GO:0003180;GO:0003180;GO:0005515;GO:0005576;GO:0005615;GO:0005615;GO:0007160;GO:0007160;GO:0010628;GO:0010628;GO:0010629;GO:0010629;GO:0010811;GO:0010811;GO:0016477;GO:0016477;GO:0016525;GO:0016525;GO:0030023;GO:0030023;GO:0030023;GO:0030198;GO:0030198;GO:0030512;GO:0030512;GO:0030948;GO:0030948;GO:0031012;GO:0031012;GO:0032966;GO:0032966;GO:0034668;GO:0034668;GO:0042802;GO:0042802;GO:0042802;GO:…	K24246	-	W	0V4G9;0DEU2;09TH9;12QJG;0IKJ2;1CPHU;0UFVH	elastin microfibril interfacer 1 [Source:RGD Symbol;Acc:1311209]	298845	D3Z9E1
ENSRNOG00000020587	324.638	204.647	444.629	2.17266	1.11946	0.00531893	0.178326	1	220854403	220861420	+	1573	Efemp2	GO:0005509;GO:0005615;GO:0008201;GO:0031012;GO:0042803;GO:0048251;GO:0048251;GO:0071953;GO:1905609;GO:0001527;GO:0005509;GO:0005509;GO:0005604;GO:0005615;GO:0005615;GO:0008201;GO:0031012;GO:0035904;GO:0042803;GO:0048251;GO:0048251;GO:0048251;GO:0060414;GO:0060840;GO:0071953;GO:0097084;GO:1904026;GO:1904028;GO:1904706;GO:1904831;GO:1905609;GO:0005509;GO:0005615;GO:0048251;	K19866	-	T	0DJ1C;KOG1217;09XPN;1CTSV;0V8MB;12QNQ;0UMQ2	EGF containing fibulin extracellular matrix protein 2 [Source:RGD Symbol;Acc:1359496]	293677	Q5XI84
ENSRNOG00000002520	1272.23	635.241	1909.23	3.00552	1.58761	0.00535314	0.179143	10	4719713	4763510	+	2238	Litaf	GO:0000978;GO:0001228;GO:0001817;GO:0005654;GO:0005765;GO:0005765;GO:0005794;GO:0005886;GO:0008270;GO:0009898;GO:0016020;GO:0032496;GO:0043231;GO:0045944;GO:0046872;GO:0050699;GO:0071222;GO:0098559;GO:0098560;GO:0098574;GO:1901223;	K19363	-	S;K	0IVVU;0VHZM;0DQ6M;0A73K;1CZ7X;193N5;13Q3V;1B5NF;0UTGC	lipopolysaccharide-induced TNF factor [Source:RGD Symbol;Acc:69294]	65161	P0C0T0;B2RYP2
ENSRNOG00000008292	2462.51	1743.15	3181.87	1.82535	0.868174	0.00539608	0.179172	6	96810907	96856052	+	3985	Hif1a	GO:0000302;GO:0000785;GO:0000977;GO:0000978;GO:0000981;GO:0000981;GO:0001228;GO:0001228;GO:0001525;GO:0001568;GO:0001666;GO:0001666;GO:0001755;GO:0001837;GO:0001892;GO:0001922;GO:0001944;GO:0001947;GO:0002039;GO:0002052;GO:0002248;GO:0003151;GO:0003208;GO:0003677;GO:0003700;GO:0003700;GO:0003700;GO:0005515;GO:0005634;GO:0005634;GO:0005634;GO:0005654;GO:0005667;GO:0005737;GO:0005829;GO:0006089;GO:…	K08268	-	K	13HTM;0V556;18TR3;1ASU2;KOG3558;0UH5E;0DFFV;1CQYZ;09U67	hypoxia inducible factor 1 subunit alpha [Source:RGD Symbol;Acc:61928]	29560	O35800
ENSRNOG00000008203	1116.23	1604.25	628.209	0.39159	-1.35258	0.00540092	0.179172	15	14559471	14737704	-	1701	Synpr	GO:0008021;GO:0016020;GO:0008021;GO:0008021;GO:0016020;GO:0016020;GO:0016020;GO:0016021;	-	-	U	1B17D;0DEJF;0IDYC;12N3N;09T87;0V477;1CP9A;0UFIA	synaptoporin [Source:RGD Symbol;Acc:708366]	-	-
ENSRNOG00000025624	1282.2	1700.36	864.039	0.508151	-0.976671	0.00540235	0.179172	8	56179637	56264263	+	7106	Arhgap20	GO:0007165;GO:0007165;	K20641	-	T	1901B;1ARFK;0V4M8;0DKNK;0UPNX;1CVH2;09TN6;13HUN;KOG4724	Rho GTPase activating protein 20 [Source:RGD Symbol;Acc:1303160]	367085	Q6REY9
ENSRNOG00000001416	467.233	314.503	619.962	1.97124	0.979104	0.00540334	0.179172	12	22677607	22680630	-	2638	Vgf	GO:0005184;	-	-	T	13BI6;0UIFK;1B544;0DSGI;1D013;18YZ7;0VAGW;0IKTZ;0A2HR	VGF nerve growth factor inducible [Source:RGD Symbol;Acc:69399]	29461	P20156
ENSRNOG00000020518	524.55	688.268	360.832	0.52426	-0.931645	0.00540511	0.179172	2	188495629	188501444	+	3053	Fam189b	GO:0016020;GO:0016021;GO:0016021;GO:0016021;GO:0050699;GO:0050699;	-	-	S	18T2Q;0V70E;0UJEQ;0DHB9;1CS1D;1B276;09W29;13N77;0IET7	family with sequence similarity 189, member B [Source:RGD Symbol;Acc:1306107]	310640	D3Z8J6
ENSRNOG00000013162	1869.65	2817.85	921.451	0.327005	-1.61261	0.00541304	0.179172	X	122808605	122811789	+	2089	Zcchc12	GO:0003676;GO:0003713;GO:0005634;GO:0008270;GO:0016605;GO:0016607;GO:0030509;GO:0032183;GO:0045944;	-	-	K	1CPRV;0UG6P;0J95G;1B1WG;140YV;0V4R1;09TRQ;18V8R;0DF22	zinc finger CCHC-type containing 12 [Source:RGD Symbol;Acc:1359439]	313436	Q5HZA3
ENSRNOG00000060482	18.8183	30.4567	7.17989	0.235741	-2.08473	0.00543069	0.17943	2	172924837	173087648	-	885	AABR07011857.2	-	-	-	-	-	-	-	-
ENSRNOG00000014294	159.435	104.761	214.11	2.04381	1.03126	0.0054501	0.179745	4	157239142	157263890	-	2353	Ptpn6	GO:0001784;GO:0001784;GO:0002244;GO:0002924;GO:0004721;GO:0004725;GO:0004725;GO:0004725;GO:0004725;GO:0004725;GO:0004725;GO:0005001;GO:0005634;GO:0005654;GO:0005730;GO:0005737;GO:0005737;GO:0005911;GO:0006470;GO:0006470;GO:0006470;GO:0006470;GO:0008284;GO:0014068;GO:0016311;GO:0016311;GO:0016787;GO:0016791;GO:0016791;GO:0017124;GO:0018108;GO:0019901;GO:0030154;GO:0030220;GO:0032715;GO:0032720;GO:…	K05697	EC:3.1.3.48	T	0V6WW;18S1Y;0DH76;KOG0790;1AUIG;1CRXA;09VYG;132K8;0UPD5	protein tyrosine phosphatase, non-receptor type 6 [Source:RGD Symbol;Acc:620660]	116689	P81718;Q499N7
ENSRNOG00000001425	70.4435	41.1099	99.777	2.42708	1.27922	0.00551437	0.181265	12	23473270	23501036	+	2806	Sh2b2	GO:0001725;GO:0001726;GO:0001922;GO:0005068;GO:0005737;GO:0005884;GO:0005886;GO:0007165;GO:0008286;GO:0019221;GO:0019222;GO:0030036;GO:0035556;GO:0035591;GO:0035591;GO:0035591;GO:0042169;GO:0050776;GO:0050851;GO:0050853;GO:0050873;	K07193	-	Z;T	0V431;0IMWK;0DEFI;0UFD7;09T4B;1ARAG;18S0J;12N1E;1CP57	SH2B adaptor protein 2 [Source:RGD Symbol;Acc:69284]	114203	Q9Z200
ENSRNOG00000010516	101.602	7.42819	195.775	26.3557	4.72004	0.00551611	0.181265	15	3644769	3650819	-	1875	Plau	GO:0001666;GO:0004252;GO:0004252;GO:0004252;GO:0005615;GO:0006508;GO:0006508;GO:0006508;GO:0008233;GO:0008236;GO:0008236;GO:0008236;GO:0009986;GO:0010469;GO:0014909;GO:0014910;GO:0016301;GO:0016310;GO:0016787;GO:0030335;GO:0031639;GO:0031639;GO:0031639;GO:0033628;GO:0042127;GO:0042730;GO:2000097;	K01348	EC:3.4.21.73	O	0V8M3;0UMGJ;132AH;0DIUV;1CTK6;0IGFI;0A2MM;18ZU8;1AWZ7	plasminogen activator, urokinase [Source:RGD Symbol;Acc:3343]	25619	Q3KR76
ENSRNOG00000007584	532.065	341.595	722.535	2.11518	1.08078	0.00554456	0.181766	3	111877853	111941841	-	3428	Ehd4	GO:0005509;GO:0005509;GO:0005515;GO:0005524;GO:0005525;GO:0005525;GO:0005768;GO:0005769;GO:0005783;GO:0005886;GO:0005886;GO:0006897;GO:0006907;GO:0010008;GO:0016020;GO:0016197;GO:0030100;GO:0030139;GO:0032456;GO:0032456;GO:0032456;GO:0032456;GO:0032456;GO:0043231;GO:0046872;GO:0048471;GO:0048471;GO:0048471;GO:0050731;GO:0051260;GO:0051260;GO:0055038;GO:0055038;GO:0055038;GO:0060271;GO:0071363;GO:…	K12477	-	T;U	1ASKS;0V6UU;1CTEH;0USGH;09XC5;12N3T;KOG1954;0DIPJ;18U9Z	EH-domain containing 4 [Source:RGD Symbol;Acc:628883]	192204	Q8R3Z7
ENSRNOG00000060753	343.053	233.74	452.365	1.93533	0.952579	0.00555719	0.181766	7	2924603	2941122	-	3270	Esyt1	GO:0006869;GO:0008289;GO:0061817;	-	-	-	-	extended synaptotagmin 1 [Source:RGD Symbol;Acc:3053]	29579	Q9Z1X1
ENSRNOG00000020845	159.508	90.786	228.229	2.51392	1.32994	0.00556131	0.181766	1	88875375	88879303	+	603	Tyrobp	GO:0002222;GO:0002223;GO:0002274;GO:0005102;GO:0005886;GO:0005887;GO:0009986;GO:0030316;GO:0030889;GO:0034241;GO:0042802;GO:0042803;GO:0050821;GO:2000010;	K07992	-	T	0J1XS;0VJG3;13YCU;1B6GG;1D4DW;0DUU9;0A8IP;0UW2M;193Q5	Tyro protein tyrosine kinase binding protein [Source:RGD Symbol;Acc:1303081]	361537	Q6X9T7
ENSRNOG00000010181	22.1066	6.02024	38.193	6.3441	2.66542	0.00558441	0.182021	4	156253079	156264769	+	3352	Clec4d	GO:0002250;GO:0002292;GO:0005886;GO:0016020;GO:0016021;GO:0030887;GO:0034987;GO:0038094;GO:0042742;GO:0045087;	K10058	-	T;V	0UJ1X;1CW80;13PCP;1B09X;KOG4297;0VAQR;0DMCT;1930B;09ZUB	C-type lectin domain family 4, member D [Source:RGD Symbol;Acc:1303339]	362432	Q69FH1
ENSRNOG00000033433	394.378	107.354	681.403	6.34725	2.66613	0.0055891	0.182021	8	128659868	128672284	-	2970	Csrnp1	GO:0000981;GO:0001228;GO:0001228;GO:0003700;GO:0003700;GO:0005634;GO:0005634;GO:0005634;GO:0005634;GO:0006355;GO:0006355;GO:0006357;GO:0009791;GO:0009791;GO:0043565;GO:0043565;GO:0043565;GO:0045944;GO:0045944;GO:0048008;GO:0048008;GO:0048705;GO:0048705;GO:0060021;GO:0060021;GO:0060325;GO:0060325;GO:0000981;GO:0001228;GO:0003700;GO:0005634;GO:0005634;GO:0005634;GO:0006355;GO:0006357;GO:0009791;GO:…	K17494	-	K	1CYEK;18ZTQ;0VDSM;0A2XC;1AX0C;13J1M;0UPGF;KOG3813;0DMCF	cysteine and serine rich nuclear protein 1 [Source:RGD Symbol;Acc:1305999]	363165	D4AAK3
ENSRNOG00000047781	2057.54	2658.6	1456.49	0.547839	-0.868176	0.00560893	0.18234	9	9988055	10001962	+	1932	Slc25a23	GO:0002082;GO:0005347;GO:0005509;GO:0005509;GO:0005739;GO:0005739;GO:0005743;GO:0005743;GO:0005743;GO:0006851;GO:0015867;GO:0016020;GO:0016021;GO:0036444;GO:0043457;GO:0051282;GO:0051503;GO:0051561;GO:0055085;GO:0055085;GO:0071277;GO:0097274;GO:1900069;GO:0002082;GO:0002082;GO:0005347;GO:0005509;GO:0005509;GO:0005739;GO:0005739;GO:0005739;GO:0005739;GO:0005743;GO:0006851;GO:0006851;GO:0015867;GO:…	K14684	-	C	18YXP;1B4GK;09UKJ;KOG0036;0UMIK;1CQJN;0DFWA;0V5JZ;12PNQ	solute carrier family 25 member 23 [Source:RGD Symbol;Acc:1588586]	301113	M0R4V4
ENSRNOG00000007682	3294.37	4251.73	2337	0.54966	-0.86339	0.00562961	0.182687	X	127562660	127829753	+	5145	Gria3	GO:0004970;GO:0004970;GO:0005216;GO:0005216;GO:0005886;GO:0006811;GO:0006811;GO:0006811;GO:0015276;GO:0015276;GO:0016020;GO:0016020;GO:0016020;GO:0016021;GO:0030054;GO:0034220;GO:0035235;GO:0038023;GO:0038023;GO:0045202;GO:0045211;GO:0004970;GO:0004970;GO:0004971;GO:0005216;GO:0005216;GO:0005886;GO:0006811;GO:0006811;GO:0006811;GO:0015276;GO:0015276;GO:0016020;GO:0016020;GO:0016020;GO:0016021;GO:…	K05199	-	T	KOG1054	glutamate ionotropic receptor AMPA type subunit 3 [Source:RGD Symbol;Acc:70958]	29628	P19492
ENSRNOG00000027736	32.8977	11.1385	54.657	4.90704	2.29485	0.00566137	0.182877	8	23113048	23121761	+	1500	Cnn1	GO:0003779;GO:0003779;GO:0003779;GO:0003779;GO:0005515;GO:0005516;GO:0005856;GO:0005856;GO:0031032;GO:0031032;GO:1904706;GO:1904706;	-	-	Z	1CYR7;1B5BV;18ZKF;KOG2046;0VDP2;0A2XZ;0UTTE;0DPS0;13HAN	calponin 1 [Source:RGD Symbol;Acc:621883]	65204	Q08290
ENSRNOG00000004158	316.126	423.101	209.151	0.494328	-1.01646	0.00566987	0.182877	6	53488883	54059119	-	7099	Hdac9	GO:0000118;GO:0000118;GO:0000118;GO:0000122;GO:0000122;GO:0001818;GO:0001818;GO:0001975;GO:0003674;GO:0003714;GO:0004407;GO:0004407;GO:0004407;GO:0004407;GO:0004407;GO:0004407;GO:0005080;GO:0005080;GO:0005634;GO:0005634;GO:0005634;GO:0005667;GO:0005667;GO:0005737;GO:0005737;GO:0006281;GO:0006325;GO:0006325;GO:0006325;GO:0007507;GO:0008134;GO:0008134;GO:0008340;GO:0016575;GO:0016575;GO:0016575;GO:…	K11409	EC:3.5.1.98	B	KOG1343;0DH82;195A6;1AV9B;0UM1F;0V6W3;09URG;1CRY6;12P3Q	histone deacetylase 9 [Source:RGD Symbol;Acc:1310748]	687001	E5RQ38
ENSRNOG00000004063	138.418	83.3226	193.514	2.32246	1.21566	0.00567918	0.182877	10	17209212	17291876	+	2753	Sh3pxd2b	GO:0001654;GO:0005515;GO:0007507;GO:0035091;GO:0060348;GO:0071800;GO:0001501;GO:0001501;GO:0001654;GO:0001654;GO:0001654;GO:0001654;GO:0002051;GO:0002102;GO:0005515;GO:0005737;GO:0005737;GO:0006801;GO:0006801;GO:0006801;GO:0007507;GO:0007507;GO:0007507;GO:0007507;GO:0010314;GO:0010628;GO:0016176;GO:0022617;GO:0022617;GO:0032266;GO:0035091;GO:0035091;GO:0040018;GO:0042169;GO:0045600;GO:0048705;GO:…	K24032	-	Z;T;C	18WKS;0V62I;09V2W;1CXQF;KOG4773;13ARM;0UN29;1AVKE;0DGC9	SH3 and PX domains 2B [Source:RGD Symbol;Acc:1309926]	303021	-
ENSRNOG00000019440	24.5378	9.63214	39.4434	4.09498	2.03386	0.00568735	0.182877	1	81230612	81245996	+	2186	Kcnn4	GO:0005267;GO:0005516;GO:0005516;GO:0005886;GO:0006811;GO:0006813;GO:0006813;GO:0006816;GO:0006884;GO:0015269;GO:0015269;GO:0015269;GO:0015269;GO:0016020;GO:0016021;GO:0016021;GO:0016021;GO:0016286;GO:0016286;GO:0019903;GO:0030322;GO:0031982;GO:0045332;GO:0046541;GO:0050714;GO:0050862;GO:0071805;GO:0005516;GO:0006813;GO:0015269;GO:0016021;GO:0016286;	K04945	-	P	1AU4E;134EP;0A2RA;18YQ2;0UPIH;1CVDQ;0VDM0;KOG3684;0DKJF	potassium calcium-activated channel subfamily N member 4 [Source:RGD Symbol;Acc:621476]	65206	A1A5N3
ENSRNOG00000021919	210.049	88.2848	331.814	3.75845	1.91014	0.00568965	0.182877	6	98284170	98367756	+	2678	Rhoj	GO:0003924;GO:0003924;GO:0003924;GO:0003924;GO:0003924;GO:0005525;GO:0005525;GO:0005525;GO:0005525;GO:0005525;GO:0005886;GO:0005886;GO:0006897;GO:0007264;GO:0007264;GO:0007266;GO:0007266;GO:0008360;GO:0008360;GO:0010594;GO:0010594;GO:0016477;GO:0030031;GO:0030036;GO:0030036;GO:0030036;GO:0032488;GO:0061299;GO:0061299;GO:0090050;GO:0090050;GO:1903670;GO:1903670;	K07864	-	Z;S	0A0Z1;1B1Z0;12T91;0DNK8;18XN4;0VBVE;KOG0393;0URXF;1CXHD	ras homolog family member J [Source:RGD Symbol;Acc:1310528]	299145	Q5RJS2
ENSRNOG00000052038	112.811	70.2181	155.404	2.21316	1.14611	0.00569577	0.182877	16	19654798	19669196	-	1466	Haus8	-	K16591	-	-	-	HAUS augmin-like complex, subunit 8 [Source:RGD Symbol;Acc:1311565]	290626	Q5BK57
ENSRNOG00000042533	7.29126	0.998708	13.5838	13.6014	3.76568	0.00575733	0.184529	3	82762862	82777814	-	2167	Accsl	GO:0003824;GO:0003824;GO:0009058;GO:0009058;GO:0030170;GO:0030170;	-	-	T;E	12WTK;1AT54;KOG0256;1955B;0V92T;1CXW0;0A3ME;0UHIP;0DNC2	1-aminocyclopropane-1-carboxylate synthase-like [Source:RGD Symbol;Acc:1596039]	690470	D3ZUW2
ENSRNOG00000003338	852.395	594.036	1110.75	1.86984	0.902915	0.00576906	0.184579	10	49538588	49568583	+	1982	Pmp22	GO:0005886;GO:0008219;GO:0016020;GO:0016021;GO:0032060;GO:0016020;GO:0016021;	K19289	-	T;U	13RKN;0VHI9;0IWVJ;0UV1Y;1D2XN;0DTPV;0A6QA;192T4;1B5P7	peripheral myelin protein 22 [Source:RGD Symbol;Acc:3359]	24660	P25094
ENSRNOG00000013320	131.886	179.61	84.1612	0.468578	-1.09364	0.00584137	0.186565	5	57883675	57896475	-	1164	RGD1561916	GO:0002177;GO:0005634;GO:0005654;GO:0005737;GO:0005829;GO:0034622;GO:0043014;GO:0048471;GO:0048471;	K18634	-	Z;S	0V5ZF;1ASBP;09UZN;0DG96;12W6U;0IJMT;194RI;1CQYM;0UHYP	similar to testes development-related NYD-SP22 isoform 1 [Source:RGD Symbol;Acc:1561916]	500441	-
ENSRNOG00000006118	501.337	291.357	711.317	2.4414	1.28771	0.00586109	0.186867	7	77156006	77162148	-	2993	Klf10	GO:0000978;GO:0001046;GO:0001228;GO:0005634;GO:0006355;GO:0007623;GO:0009267;GO:0030282;GO:0035019;GO:0045672;GO:0045892;GO:0045944;GO:1990837;	K09209	-	K	18X56;13JUR;09Y6F;0UQA9;0VEJG;KOG1721;1B2AF;1D08Q;0DR3S	Kruppel-like factor 10 [Source:RGD Symbol;Acc:621652]	81813	O08876
ENSRNOG00000047606	66.4299	13.5303	119.33	8.81946	3.14069	0.0058807	0.187165	8	96551245	96559483	+	834	Bcl2a1	GO:0005575;GO:0005739;GO:0005741;GO:0006915;GO:0006915;GO:0007568;GO:0008630;GO:0021987;GO:0042803;GO:0042981;GO:0042981;GO:0043066;GO:0043066;GO:0044877;GO:0046982;GO:0051400;GO:0097192;	K02162	-	T	192MA;1CPFD;0A0GW;0DERK;0UFS5;KOG4728;1ARKX;0V569;13S3B	BCL2-related protein A1 [Source:RGD Symbol;Acc:620621]	170929	Q925A9
ENSRNOG00000008412	52.4731	8.40832	96.5379	11.4812	3.52121	0.00589737	0.187315	4	168832910	168851652	+	2092	Gprc5a	GO:0004930;GO:0004930;GO:0005730;GO:0005886;GO:0005886;GO:0005886;GO:0005886;GO:0007175;GO:0007186;GO:0007186;GO:0016020;GO:0016021;GO:0016021;GO:0016021;GO:0030295;GO:0031982;GO:0031982;GO:0032147;GO:0043231;GO:0043231;GO:0043235;GO:0070062;	K08468	-	T	0DNXG;0VC5K;1CXUV;1AY9A;192GF;0UNIR;12SSQ;0IIGU;0A19U	G protein-coupled receptor, class C, group 5, member A [Source:RGD Symbol;Acc:1310804]	312790	A1A5R2
ENSRNOG00000014048	1260.81	1630.45	891.174	0.546582	-0.871489	0.00590969	0.187315	19	19265164	19315357	-	3562	Cyld	GO:0002376;GO:0004843;GO:0004843;GO:0004843;GO:0005813;GO:0005815;GO:0005819;GO:0005819;GO:0005829;GO:0005881;GO:0005886;GO:0006508;GO:0006511;GO:0006511;GO:0007346;GO:0008233;GO:0008234;GO:0008270;GO:0010803;GO:0016020;GO:0016055;GO:0016579;GO:0016579;GO:0016579;GO:0016787;GO:0019901;GO:0030496;GO:0031234;GO:0032088;GO:0042995;GO:0045087;GO:0045087;GO:0046329;GO:0048471;GO:0050727;GO:0060544;GO:…	K08601	EC:3.4.19.12	O	0V9HG;12R9A;KOG3556;09YJR	CYLD lysine 63 deubiquitinase [Source:RGD Symbol;Acc:1308346]	312937	Q66H62
ENSRNOG00000015071	74.305	104.919	43.6905	0.41642	-1.26389	0.00591629	0.187315	1	70253650	70266809	+	3080	Zim1	GO:0000978;GO:0000981;GO:0005634;GO:0006355;GO:0006355;GO:0006357;GO:0046872;GO:0000978;GO:0000981;GO:0005634;GO:0006357;	K09228	-	K	0UX97;1D6BK;0DX77;143V4;0VPS9;KOG1721;0ACK9	zinc finger, imprinted 1 [Source:RGD Symbol;Acc:1310930]	308322	A0A0G2KA26
ENSRNOG00000026647	398.225	113.946	682.504	5.98969	2.58248	0.0059535	0.188166	10	57060007	57064600	-	1705	Cxcl16	GO:0005041;GO:0005041;GO:0005041;GO:0005041;GO:0005044;GO:0005044;GO:0005044;GO:0005044;GO:0005125;GO:0005615;GO:0005615;GO:0005615;GO:0006898;GO:0006898;GO:0006935;GO:0006935;GO:0006935;GO:0007165;GO:0008009;GO:0008009;GO:0008009;GO:0008009;GO:0010818;GO:0010818;GO:0016020;GO:0016021;GO:0016021;GO:0030307;GO:0030307;GO:0030307;GO:0030335;GO:0030335;GO:0030335;GO:0030335;GO:0034097;GO:0034097;GO:…	K10035	-	W;T	0A6MB;0UUCY;1D2YN;0VHFG;1B5DC;0J8A5;0DTM6;142Z2;193U1	C-X-C motif chemokine ligand 16 [Source:RGD Symbol;Acc:1562928]	497942	Q6AXU5;A0A6M4C4P9
ENSRNOG00000001336	138.447	88.2847	188.609	2.13638	1.09517	0.00598544	0.188533	12	38981927	38995570	-	1122	Orai1	GO:0002115;GO:0002115;GO:0005262;GO:0005829;GO:0005886;GO:0005887;GO:0015279;GO:0016020;GO:0016323;GO:0032991;GO:0042802;GO:0044853;GO:0045121;GO:0045762;GO:0051924;GO:0051928;GO:0061180;GO:0070509;GO:0070588;	-	-	A	KOG4298	ORAI calcium release-activated calcium modulator 1 [Source:RGD Symbol;Acc:1311873]	-	-
ENSRNOG00000036711	32.9084	15.7231	50.0937	3.18599	1.67174	0.00598584	0.188533	1	198572999	198577226	-	3866	Spn	GO:0004888;GO:0004888;GO:0016020;GO:0016021;GO:0032609;GO:0050863;GO:0050863;GO:2000404;GO:2000404;	K06477	-	S;T	13UTR;0J161;0DSHB;1D1TC;0VB1Y;0UUZ4;0A531	sialophorin [Source:RGD Symbol;Acc:3750]	24796	R9PXZ7
ENSRNOG00000001989	2331.13	3057.13	1605.12	0.52504	-0.9295	0.00603281	0.189684	11	50781127	50985083	+	2868	Alcam	GO:0001772;GO:0001772;GO:0001772;GO:0002250;GO:0002376;GO:0005886;GO:0005887;GO:0007155;GO:0007157;GO:0007157;GO:0007157;GO:0007411;GO:0007411;GO:0008045;GO:0008045;GO:0009897;GO:0009897;GO:0016020;GO:0016021;GO:0030424;GO:0030424;GO:0030424;GO:0030425;GO:0031226;GO:0031226;GO:0031226;GO:0031290;GO:0042101;GO:0042101;GO:0042101;GO:0042802;GO:0042802;GO:0042995;GO:0043025;GO:0043025;GO:0048846;GO:…	K06547	-	T	12SIX;0IFQ2;1CY32;0DP51;0A1H5;18U0H;0UGSG;0VCCP;1ASGC	activated leukocyte cell adhesion molecule [Source:RGD Symbol;Acc:619972]	79559	O35112
ENSRNOG00000006527	5344.59	6956.32	3732.86	0.536615	-0.898041	0.00606275	0.190297	4	146276862	146292213	+	4077	Slc6a1	GO:0005332;GO:0005332;GO:0005886;GO:0005886;GO:0005887;GO:0006836;GO:0007613;GO:0008306;GO:0010035;GO:0015185;GO:0015378;GO:0016020;GO:0016021;GO:0030424;GO:0043025;GO:0050808;GO:0051939;GO:0051939;GO:0098658;GO:0098719;GO:1902476;	K05034	-	P	KOG3659;12NMW;18TIT;09U0F;0DFA6;0V4BE;1AVFJ;0UUIJ;1CPZX	solute carrier family 6 member 1 [Source:RGD Symbol;Acc:620533]	79212	P23978
ENSRNOG00000060179	157.224	242.748	71.7003	0.29537	-1.75941	0.00610835	0.191398	X	139579268	139916883	-	1848	Gpc3	GO:0001658;GO:0001822;GO:0005764;GO:0005886;GO:0005886;GO:0008285;GO:0009617;GO:0009887;GO:0009948;GO:0009966;GO:0010171;GO:0030282;GO:0030316;GO:0030324;GO:0030513;GO:0035116;GO:0040008;GO:0045732;GO:0045807;GO:0045879;GO:0045880;GO:0045926;GO:0046326;GO:0046658;GO:0046658;GO:0050680;GO:0060422;GO:0060828;GO:0060976;GO:0062023;GO:0072111;GO:0072138;GO:0072180;GO:0072203;GO:0090090;GO:0090263;GO:…	K08109	-	-	-	glypican 3 [Source:RGD Symbol;Acc:2725]	25236	P13265
ENSRNOG00000005375	237.948	368.462	107.434	0.291575	-1.77806	0.00613332	0.191527	5	6936016	7465510	-	3852	RGD1564053	-	-	-	S;T	12QMQ;1927U;1B076;1CS5I;0DHFD;0UIGV;0IFD0;09W64;0V74D	RIKEN cDNA A830018L16 gene [Source:MGI Symbol;Acc:MGI:2444149]	500390	-
ENSRNOG00000028781	46.7406	74.0387	19.4425	0.262599	-1.92907	0.00613464	0.191527	1	101959540	102013243	-	5775	Abcc6	GO:0005524;GO:0005524;GO:0005654;GO:0005886;GO:0015431;GO:0015867;GO:0016021;GO:0016323;GO:0016887;GO:0022857;GO:0030643;GO:0042626;GO:0042626;GO:0055085;GO:0071716;	K05669	-	Q	KOG0054;0V48M;09T9I;0UFWQ;1CPBJ;0DEMQ;12N3Q;18YHV;1AXXY	ATP binding cassette subfamily C member 6 [Source:RGD Symbol;Acc:620268]	81642	O88269
ENSRNOG00000002393	2980.52	2127.3	3833.73	1.80216	0.849727	0.00614401	0.191527	13	103300932	103371577	+	4855	Eprs	GO:0000166;GO:0004812;GO:0004818;GO:0004827;GO:0004827;GO:0004827;GO:0005524;GO:0005737;GO:0005737;GO:0005829;GO:0005886;GO:0006412;GO:0006418;GO:0006424;GO:0006433;GO:0006433;GO:0006433;GO:0008270;GO:0017101;GO:0017101;GO:0017148;GO:0017148;GO:0032869;GO:0035613;GO:0042802;GO:0042803;GO:0043039;GO:0051020;GO:0071346;GO:0071346;GO:0140212;GO:0140212;GO:1990904;GO:0000166;GO:0000166;GO:0000166;GO:…	K14163	-	J	KOG1147;12SMX;0V4MD;18UEN;0DEYR;1B0BZ;1CPNE;09TNC;KOG4163;0UG9T	glutamyl-prolyl-tRNA synthetase [Source:RGD Symbol;Acc:1310952]	289352	Q6TXE9
ENSRNOG00000008519	701.344	916.461	486.226	0.530547	-0.914447	0.00615605	0.191574	8	102088505	102159828	-	5404	Dipk2a	-	-	-	S;U	0VAS2;0IKM0;0DME2;13JQ7;0USUP;09ZVM;1CW99;19189;1AZZG	divergent protein kinase domain 2A [Source:RGD Symbol;Acc:1309079]	315891	A0A0G2K1M5
ENSRNOG00000003069	370.838	250.016	491.66	1.96652	0.975643	0.00617102	0.191712	14	71715269	71754672	-	2247	Cd38	GO:0001666;GO:0003953;GO:0003953;GO:0003953;GO:0003953;GO:0003953;GO:0005634;GO:0005886;GO:0005886;GO:0005886;GO:0007204;GO:0007565;GO:0008284;GO:0009725;GO:0009986;GO:0009986;GO:0010977;GO:0014824;GO:0016020;GO:0016020;GO:0016020;GO:0016021;GO:0016323;GO:0016740;GO:0016787;GO:0016798;GO:0016798;GO:0016849;GO:0016849;GO:0016849;GO:0030307;GO:0030667;GO:0030890;GO:0030890;GO:0030890;GO:0030890;GO:…	K01242	-	M;T	09UGC;18Z8J;0IH8E;0UR65;0DNUA;1B4WD;12TG0;0VC2H;1CXRM	CD38 molecule [Source:RGD Symbol;Acc:2303]	25668	Q64244
ENSRNOG00000017869	254.117	161.233	347.001	2.15217	1.10579	0.00619618	0.192166	19	54314865	54336640	+	2853	Irf8	GO:0000122;GO:0000122;GO:0000122;GO:0000976;GO:0000976;GO:0000977;GO:0000977;GO:0000978;GO:0000978;GO:0000978;GO:0000981;GO:0000981;GO:0001227;GO:0001227;GO:0002273;GO:0002273;GO:0002314;GO:0002316;GO:0002376;GO:0003677;GO:0003677;GO:0003677;GO:0003700;GO:0003700;GO:0005515;GO:0005515;GO:0005634;GO:0005634;GO:0005634;GO:0005634;GO:0005634;GO:0005654;GO:0005737;GO:0005737;GO:0006355;GO:0006355;GO:…	K10155	-	K	0IED8;1CQWX;0UH9B;09UXV;12P0C;0V5XS;0DG7D;18WNW;1B0TA	interferon regulatory factor 8 [Source:RGD Symbol;Acc:1312024]	292060	Q5NUI4
ENSRNOG00000003018	336.06	163.147	508.973	3.11972	1.64142	0.00623178	0.192652	13	88995316	89032487	+	3122	Olfml2b	GO:0030198;GO:0030198;GO:0031012;GO:0031012;GO:0042802;GO:0042802;GO:0050840;GO:0050840;	-	-	W	0V58X;12NMM;0UH28;1AZIB;1CQ97;18SG8;09U9S;KOG3545;0DFJG	olfactomedin-like 2B [Source:RGD Symbol;Acc:1309257]	304960	D4A0J7
ENSRNOG00000012956	1147.43	471.913	1822.96	3.86291	1.94969	0.00624568	0.192652	3	154597168	154627257	-	3506	Tgm2	GO:0000166;GO:0000785;GO:0000785;GO:0001974;GO:0003810;GO:0003810;GO:0003810;GO:0003810;GO:0003810;GO:0003810;GO:0003810;GO:0003810;GO:0005509;GO:0005509;GO:0005515;GO:0005525;GO:0005525;GO:0005525;GO:0005576;GO:0005634;GO:0005634;GO:0005694;GO:0005737;GO:0005737;GO:0005739;GO:0005739;GO:0005739;GO:0005739;GO:0005783;GO:0005829;GO:0005829;GO:0005886;GO:0005886;GO:0005886;GO:0006508;GO:0007200;GO:…	K05625	EC:2.3.2.13	O;T	18UI9;0V54T;12WTW;0IFMV;0UGRC;09U5T;1CQ55;0DFFC;1AXCB	transglutaminase 2 [Source:RGD Symbol;Acc:621081]	56083	Q9WVJ6
ENSRNOG00000043044	128.893	46.2988	211.487	4.56786	2.19152	0.00624609	0.192652	7	12782491	12787750	+	723	Cnn2	GO:0001725;GO:0003779;GO:0005515;GO:0005856;GO:0007010;GO:0031032;GO:0032970;GO:0071260;	-	-	Z	KOG2046;0VDP2;0A2XZ;13HAN	calponin 2 [Source:RGD Symbol;Acc:1589807]	690976	-
ENSRNOG00000014350	379.775	51.1142	708.436	13.8599	3.79284	0.00626771	0.192652	2	251529354	251532312	-	1984	Ccn1	GO:0001649;GO:0001934;GO:0002041;GO:0003181;GO:0003278;GO:0003281;GO:0005178;GO:0005515;GO:0005520;GO:0005520;GO:0005576;GO:0005576;GO:0005576;GO:0007155;GO:0007165;GO:0007165;GO:0010518;GO:0010811;GO:0030198;GO:0030335;GO:0030335;GO:0030501;GO:0030513;GO:0033690;GO:0043065;GO:0043066;GO:0043280;GO:0044319;GO:0045597;GO:0045669;GO:0045860;GO:0045944;GO:0050840;GO:0060413;GO:0060591;GO:0060710;GO:…	K06829	-	W	13MDU;0IIY0;0V98S;0DJQX;1AY1V;0UN0I;1CUHY;09YB6;18Z05	cellular communication network factor 1 [Source:RGD Symbol;Acc:620763]	83476	Q9ES72;Q66HT5
ENSRNOG00000002456	283.938	374.76	193.116	0.515305	-0.956502	0.00627115	0.192652	10	77840568	77918191	-	888	Hlf	GO:0001228;GO:0003677;GO:0003677;GO:0003677;GO:0003700;GO:0003700;GO:0005634;GO:0005634;GO:0005634;GO:0005654;GO:0006355;GO:0006355;GO:0006357;GO:0006357;GO:0035914;GO:0043565;GO:0045944;GO:1990837;	K09057	-	K	0UJDF;0DJM3;1AWT6;1CUDW;18SBG;0V955;12TD3;09Y7M;KOG3119	HLF transcription factor, PAR bZIP family member [Source:RGD Symbol;Acc:1582828]	690286	-
ENSRNOG00000051624	716.634	485.488	947.78	1.95222	0.965117	0.00627837	0.192652	9	61692154	61694599	+	267	Hspe1	GO:0005524;GO:0006457;	K04078	-	-	-	heat shock protein family E (Hsp10) member 1 [Source:RGD Symbol;Acc:2844]	25462	P97601
ENSRNOG00000006355	905.058	1174.69	635.424	0.540928	-0.886492	0.00628593	0.192652	7	14340170	14369821	-	2089	Akap8l	GO:0000785;GO:0000785;GO:0003677;GO:0003677;GO:0005521;GO:0005521;GO:0005634;GO:0005634;GO:0005634;GO:0005634;GO:0005634;GO:0005634;GO:0005737;GO:0005737;GO:0006397;GO:0006397;GO:0007076;GO:0007076;GO:0010793;GO:0010793;GO:0016301;GO:0016310;GO:0016363;GO:0016363;GO:0016363;GO:0016607;GO:0031065;GO:0031065;GO:0033127;GO:0033127;GO:0034237;GO:0042826;GO:0042826;GO:0044839;GO:0044839;GO:0045944;GO:…	K15978	-	T	1CVE6;09Z43;12TMK;1AV14;0UPJ5;0IIFX;0V75R;191E7;0DKJT	A-kinase anchoring protein 8 like [Source:RGD Symbol;Acc:1359200]	299569	Q5U306
ENSRNOG00000054437	62.192	27.7636	96.6205	3.48011	1.79913	0.00629649	0.192652	14	108491069	108509892	-	1770	Rel	GO:0000978;GO:0001228;GO:0003677;GO:0003700;GO:0005634;GO:0005737;GO:0006355;GO:0007249;GO:0010629;GO:0032688;GO:0043123;GO:0045893;GO:0045944;	K09254	-	-	-	REL proto-oncogene, NF-kB subunit [Source:RGD Symbol;Acc:1311231]	305584	-
ENSRNOG00000031448	94.595	133.082	56.1078	0.421603	-1.24604	0.00631952	0.19299	5	153835821	153888506	+	2384	Stpg1	GO:0043065;GO:1902110;	-	-	S	0V51V;12N4Z;0IK80;18TZ1;1CQ29;1B14N;0DFCJ;0UGMK;09U2V	sperm-tail PG-rich repeat containing 1 [Source:RGD Symbol;Acc:1560169]	500566	Q4KLY8
ENSRNOG00000059362	35.2728	52.9664	17.5793	0.331895	-1.5912	0.00633467	0.19299	19	39063998	39077722	+	6956	Has3	GO:0005634;GO:0005737;GO:0005887;GO:0016020;GO:0016021;GO:0030213;GO:0030213;GO:0036117;GO:0042802;GO:0045226;GO:0045226;GO:0045893;GO:0050501;GO:0050501;GO:0085029;GO:0085029;GO:1900106;GO:0005634;GO:0005634;GO:0005737;GO:0005737;GO:0005887;GO:0016020;GO:0016021;GO:0030213;GO:0030213;GO:0030213;GO:0030213;GO:0036117;GO:0036117;GO:0042802;GO:0042802;GO:0045226;GO:0045226;GO:0045226;GO:0045893;GO:…	K00752	EC:2.4.1.212	-	-	hyaluronan synthase 3 [Source:RGD Symbol;Acc:628656]	266805	Q8CH92
ENSRNOG00000004437	318.528	418.254	218.802	0.52313	-0.934757	0.00633936	0.19299	10	98706960	98823287	+	2123	Map2k6	GO:0000165;GO:0000165;GO:0000166;GO:0000187;GO:0000187;GO:0000187;GO:0000187;GO:0001649;GO:0001649;GO:0001934;GO:0002931;GO:0004672;GO:0004672;GO:0004674;GO:0004708;GO:0004708;GO:0004708;GO:0004708;GO:0005524;GO:0005524;GO:0005524;GO:0005575;GO:0005654;GO:0005829;GO:0006468;GO:0006468;GO:0006468;GO:0006468;GO:0006915;GO:0016301;GO:0016310;GO:0019901;GO:0019901;GO:0022602;GO:0032308;GO:0042493;GO:…	K04433	EC:2.7.12.2	T;K	KOG0984;0V5YT;0DG8H;12S0B;195RY;09UYZ;0UG1R;1AV8T;1CQXZ	mitogen-activated protein kinase kinase 6 [Source:RGD Symbol;Acc:620666]	114495	Q925D6
ENSRNOG00000019330	109.692	19.0132	200.37	10.5385	3.3976	0.00635426	0.193121	3	151285249	151289595	+	1470	Procr	GO:0005813;GO:0038023;GO:0050819;	K06557	-	W;T	13Q2F;1B2KY;0DRFT;0VEQK;18Y8Y;0IWW5;0UMZV;0A3VY;1D0N4	protein C receptor [Source:RGD Symbol;Acc:1305991]	362248	Q4V8I1
ENSRNOG00000014336	53.5721	11.9513	95.193	7.9651	2.99369	0.00639078	0.193871	19	14523554	14561278	+	3163	Mcm5	GO:0003677;GO:0003688;GO:0005524;GO:0005634;GO:0005654;GO:0006260;GO:0006270;GO:0032508;GO:0042555;GO:0042555;GO:0000166;GO:0000727;GO:0003677;GO:0003677;GO:0003677;GO:0003678;GO:0003688;GO:0003688;GO:0003688;GO:0003697;GO:0004386;GO:0005524;GO:0005524;GO:0005524;GO:0005634;GO:0005634;GO:0005634;GO:0006260;GO:0006260;GO:0006267;GO:0006270;GO:0006270;GO:0006270;GO:0007049;GO:0016887;GO:0017116;GO:…	K02209	EC:3.6.4.12	L	KOG0481	minichromosome maintenance complex component 5 [Source:RGD Symbol;Acc:1306616]	291885	E9PTS4
ENSRNOG00000007918	78.9128	47.1042	110.721	2.35056	1.23301	0.00640026	0.193871	4	66670618	66846805	+	1961	Tbxas1	GO:0001516;GO:0004796;GO:0004796;GO:0005506;GO:0005789;GO:0006690;GO:0016705;GO:0020037;GO:0020037;GO:0055114;GO:0106256;	K01832	EC:5.3.99.5	Q	0V9SY;1CV43;0UP77;1B040;18T2T;12P50;0DKA3;09VC0;KOG0158	thromboxane A synthase 1 [Source:RGD Symbol;Acc:3826]	24886	P49430
ENSRNOG00000005874	156.708	212.817	100.599	0.472699	-1.08101	0.00643486	0.194462	7	10988532	11003785	-	2844	Tle2	GO:0005515;GO:0005634;GO:0006355;GO:0003714;GO:0003714;GO:0003714;GO:0005515;GO:0005634;GO:0005634;GO:0005634;GO:0005634;GO:0005654;GO:0005667;GO:0005925;GO:0006355;GO:0006355;GO:0016055;GO:0016604;GO:0045892;GO:0045892;GO:0070491;GO:0090090;GO:0090090;GO:0090090;	K04497	-	K;B	12N8K;1ASQH;1D06P;0UTW7;KOG0639;0DQRQ;0A3EV;18TSI;0V4HK	TLE family member 2, transcriptional corepressor [Source:RGD Symbol;Acc:1306665]	299636	Q496Z7
ENSRNOG00000018483	573.527	401.672	745.382	1.8557	0.891963	0.00645177	0.194462	19	32188267	32248684	+	2981	Smad1	GO:0000165;GO:0000978;GO:0000978;GO:0000981;GO:0001228;GO:0001649;GO:0001657;GO:0001710;GO:0002051;GO:0003677;GO:0003700;GO:0003700;GO:0005515;GO:0005634;GO:0005634;GO:0005634;GO:0005637;GO:0005667;GO:0005667;GO:0005667;GO:0005737;GO:0005737;GO:0005737;GO:0006355;GO:0006355;GO:0006357;GO:0006468;GO:0006954;GO:0007179;GO:0007179;GO:0007183;GO:0007276;GO:0008285;GO:0010628;GO:0010628;GO:0017151;GO:…	K04676	-	K	KOG3701;09TDQ;0DHAU;0V4CT;12PNA	SMAD family member 1 [Source:RGD Symbol;Acc:3030]	25671	P97588;Q6P7A6
ENSRNOG00000004672	933.929	1208.81	659.046	0.545201	-0.875139	0.00645181	0.194462	14	84335597	84355528	-	2589	Sec14l2	GO:0005654;GO:0005829;	-	-	K;I	0DJ7Y;1CTZW;KOG1471;0V8T2;18V5K;13JFG;0UHWX;09XVF;1B1RI	SEC14-like lipid binding 2 [Source:RGD Symbol;Acc:621779]	116486	Q5EBD0
ENSRNOG00000000488	552.737	349.236	756.239	2.16541	1.11464	0.00646804	0.194629	20	7136007	7138980	+	324	Hmga1	GO:0000785;GO:0003677;GO:0005634;GO:0006355;	K09282	-	K	13YDG;0DV8I;1D4EN;0A8TM;0VJQ1;0J4ZT	high mobility group AT-hook 1 [Source:RGD Symbol;Acc:628699]	117062	Q8K585
ENSRNOG00000010805	7.85397	1.21262	14.4953	11.9537	3.57938	0.0064962	0.194717	2	93792601	93797305	+	667	Fabp4	GO:0005504;GO:0005504;GO:0008289;GO:0008289;GO:0050727;GO:0050727;GO:0120162;GO:0005324;GO:0005504;GO:0005634;GO:0005737;GO:0006469;GO:0008289;GO:0009617;GO:0015909;GO:0036041;GO:0042632;GO:0045892;GO:0050727;GO:0050729;GO:0050872;GO:0050873;GO:0051427;GO:0071285;GO:0071356;GO:0120162;	K08753	-	I	13QG7;KOG4015;0VHGU;0A7EJ	fatty acid binding protein 4 [Source:RGD Symbol;Acc:69309]	79451	Q5XFV4;Q9R290
ENSRNOG00000016281	2352.27	951.622	3752.92	3.94371	1.97955	0.00649623	0.194717	16	83522162	83632153	+	6579	Col4a1	GO:0001569;GO:0001569;GO:0003674;GO:0005201;GO:0005201;GO:0005201;GO:0005201;GO:0005201;GO:0005575;GO:0005576;GO:0005581;GO:0005581;GO:0005581;GO:0005587;GO:0005587;GO:0005587;GO:0005604;GO:0005604;GO:0005604;GO:0005604;GO:0005615;GO:0007420;GO:0007420;GO:0007528;GO:0007528;GO:0016020;GO:0030020;GO:0030020;GO:0030198;GO:0030855;GO:0031012;GO:0038063;GO:0038063;GO:0048407;GO:0048407;GO:0048514;GO:…	K06237	-	W	18WJC;0UMXW;1ATZR;09U8F;0V57J;1CQ81;KOG3544;0DFDX;12N1R	collagen type IV alpha 1 chain [Source:RGD Symbol;Acc:1307148]	290905	F1MA59
ENSRNOG00000003031	4177.97	6778.47	1577.48	0.232718	-2.10334	0.00650303	0.194717	13	50091430	50153823	+	8531	Atp2b4	GO:0000166;GO:0000166;GO:0000166;GO:0003407;GO:0005388;GO:0005388;GO:0005388;GO:0005388;GO:0005388;GO:0005388;GO:0005516;GO:0005516;GO:0005524;GO:0005524;GO:0005524;GO:0005886;GO:0005887;GO:0005929;GO:0006357;GO:0006811;GO:0006816;GO:0006816;GO:0006874;GO:0006874;GO:0006874;GO:0007283;GO:0010629;GO:0010751;GO:0014832;GO:0014832;GO:0015085;GO:0016020;GO:0016020;GO:0016020;GO:0016020;GO:0016021;GO:…	K05850	EC:7.2.2.10	P	0DJY0;18ZBC;12P5I;1B2BV;09YFF;1CURI;KOG0204;0V9D9;0US9G	ATPase plasma membrane Ca2+ transporting 4 [Source:RGD Symbol;Acc:621305]	29600	Q64542
ENSRNOG00000016632	8.95822	0.332903	17.5835	52.8188	5.72298	0.00651402	0.194725	18	15650526	15688284	-	6384	Dsg3	GO:0005509;GO:0005886;GO:0007155;GO:0007156;GO:0016020;GO:0005509;GO:0005886;GO:0007155;GO:0007156;GO:0016020;	K07598	-	Z;U	0UI7C;09TST;1ATSE;1CPSY;0V4S4;0DF33;13JJ4;KOG3594;190JB	desmoglein 3 [Source:RGD Symbol;Acc:1592103]	291752	D3ZL74
ENSRNOG00000033863	777.116	1089.03	465.202	0.427172	-1.22711	0.00656443	0.19591	3	2800650	2803574	-	2925	Ajm1	GO:0045216;GO:0045216;	-	-	-	-	apical junction component 1 homolog [Source:RGD Symbol;Acc:1560470]	362083	D3ZTF0
ENSRNOG00000026235	40.2726	3.74197	76.8033	20.5248	4.3593	0.00663413	0.197667	17	10137974	10152956	+	3277	Hk3	GO:0000166;GO:0001678;GO:0001678;GO:0004340;GO:0004396;GO:0004396;GO:0004396;GO:0004396;GO:0005524;GO:0005524;GO:0005524;GO:0005536;GO:0005536;GO:0005975;GO:0005975;GO:0006096;GO:0006096;GO:0006096;GO:0016301;GO:0016310;GO:0016740;GO:0016773;GO:0016773;GO:0019318;GO:0046835;GO:0051156;GO:0000166;GO:0001678;GO:0001678;GO:0004340;GO:0004396;GO:0004396;GO:0004396;GO:0004396;GO:0004396;GO:0005524;GO:…	K00844	EC:2.7.1.1	G	09TDH;0UJHP;18YQV;12P4I;KOG1369;1AXD3;0V4CM;0DIJA;1D1CB	hexokinase 3 [Source:RGD Symbol;Acc:2798]	25060	P27926
ENSRNOG00000013733	577.138	404.746	749.531	1.85186	0.888972	0.0066451	0.19767	9	113534326	113573307	+	3625	Ppp4r1	GO:0005515;GO:0007165;GO:0007165;GO:0019888;GO:0019888;GO:0030289;GO:0030289;GO:0043666;GO:0050790;GO:0050790;	K15424	-	T	0E9R2;197IG;0V40D;0WJHP;1DGJD;0B6RZ;13GPQ;0IUDJ;1BBMZ	protein phosphatase 4, regulatory subunit 1 [Source:RGD Symbol;Acc:619798]	140943	Q8VI02
ENSRNOG00000037435	369.04	482.767	255.313	0.528853	-0.91906	0.00665994	0.197788	6	147876237	147940226	+	3790	Tmem196	GO:0016020;GO:0016021;	K22195	-	S	13JBG;0A1TE;0UST6;1B54S;193CP;0DG8G;0VCP6;0IK3M;1CQXY	transmembrane protein 196 [Source:RGD Symbol;Acc:1562527]	500750	Q5EB63
ENSRNOG00000057823	1536.72	1094.01	1979.44	1.80934	0.855461	0.00669913	0.198628	12	36638457	36642734	+	2545	Ubc	GO:0002020;GO:0005515;	K08770	-	-	-	ubiquitin C [Source:RGD Symbol;Acc:621244]	50522	Q63429
ENSRNOG00000030253	28.2861	12.9762	43.5961	3.3597	1.74833	0.00671589	0.198801	2	207252196	207255824	-	544	Tafa3	GO:0005615;GO:0005615;GO:0005615;GO:0005615;GO:0007165;GO:0014016;GO:0048018;GO:1902692;GO:1903979;GO:1903979;GO:1903979;GO:1903980;GO:1903980;GO:1903980;	-	-	S	13S60;1B64U;0A723;0UVQ2;0VHW1;0IXED;1D3W7;0DUIJ;1939K	TAFA chemokine like family member 3 [Source:RGD Symbol;Acc:1587462]	691123	-
ENSRNOG00000020185	1640.23	2223.74	1056.72	0.4752	-1.07339	0.0068568	0.202356	8	117358787	117366096	-	4495	Wdr6	GO:0005515;GO:0005737;GO:0005829;GO:0005886;GO:0007050;GO:0008180;GO:0008285;GO:0010507;	K24737	-	S;O	0DNW4;191PB;KOG0974;1CXTJ;0VC42;12TH7;1AU6B;0UT14;0A18D	WD repeat domain 6 [Source:RGD Symbol;Acc:1307649]	301007	Q5XFW6
ENSRNOG00000008428	100.116	165.856	34.3765	0.207267	-2.27044	0.00685821	0.202356	8	53678777	53743642	+	2747	Drd2	GO:0001591;GO:0001591;GO:0001659;GO:0001975;GO:0001976;GO:0002027;GO:0002028;GO:0002052;GO:0004930;GO:0004930;GO:0004952;GO:0004952;GO:0005886;GO:0005887;GO:0005929;GO:0007186;GO:0007186;GO:0007195;GO:0007195;GO:0007195;GO:0007270;GO:0007409;GO:0007608;GO:0007625;GO:0007626;GO:0007628;GO:0007631;GO:0008104;GO:0008285;GO:0008306;GO:0008542;GO:0009416;GO:0016021;GO:0021853;GO:0021984;GO:0030336;GO:…	K04145	-	T	KOG3656;0V9WF;0DEU8;13IKA;09YYS	dopamine receptor D2 [Source:RGD Symbol;Acc:2520]	24318	P61169
ENSRNOG00000016037	115.174	73.6704	156.678	2.12675	1.08865	0.00687119	0.202411	3	156339004	156340913	-	1910	Mafb	GO:0000978;GO:0001228;GO:0003677;GO:0003677;GO:0003700;GO:0005634;GO:0005634;GO:0005667;GO:0006355;GO:0006355;GO:0006357;GO:0007379;GO:0007585;GO:0008134;GO:0021571;GO:0021572;GO:0021599;GO:0033077;GO:0035284;GO:0042472;GO:0043565;GO:0045647;GO:0045671;GO:0045893;GO:0045944;GO:0048538;	K09036	-	K	1B179;0DM6M;0VAJN;0URB0;1950H;KOG4196;13UZ2;09ZNW;1CW1U	MAF bZIP transcription factor B [Source:RGD Symbol;Acc:2982]	54264	P54842
ENSRNOG00000002305	715.385	925.767	505.003	0.545497	-0.874358	0.00688585	0.202515	11	66932614	66961713	+	3998	Slc15a2	GO:0006857;GO:0006857;GO:0015293;GO:0015333;GO:0016020;GO:0016020;GO:0016020;GO:0016021;GO:0016021;GO:0016021;GO:0022857;GO:0022857;GO:0035673;GO:0035673;GO:0055085;GO:0055085;GO:0071916;GO:0140206;GO:1902600;	K14637	-	P;E	1AZJ1;12QTM;0DM9E;0V9VJ;1CTBE;0UPVU;09VFW;KOG1237;18VS2	solute carrier family 15 member 2 [Source:RGD Symbol;Acc:61972]	60577	A0A0H2UHA7;Q5U401
ENSRNOG00000002126	1482.25	1909.78	1054.72	0.55227	-0.856554	0.00690658	0.202729	11	20471764	20705063	+	5006	Ncam2	GO:0005515;GO:0005886;GO:0007155;GO:0016020;GO:0016604;GO:0030424;GO:0042802;GO:0005515;GO:0007155;GO:0007155;GO:0007155;GO:0007413;GO:0007608;GO:0016020;GO:0016020;GO:0016020;GO:0016021;GO:0030424;GO:0042802;GO:0043005;GO:0005515;GO:0007155;GO:0016020;	K06491	-	T	0V37P;0B4P1;13DEB;0IQJD;1978F;0WH7B;1DFCV;0E8EJ;1BB23	neural cell adhesion molecule 2 [Source:RGD Symbol;Acc:1303131]	288280	Q6RKB3
ENSRNOG00000057451	298.367	67.873	528.861	7.79192	2.96198	0.00691539	0.202729	7	144970444	144993652	-	4395	Itga5	GO:0005154;GO:0005178;GO:0005178;GO:0005615;GO:0005737;GO:0005783;GO:0005783;GO:0005794;GO:0005794;GO:0005886;GO:0005886;GO:0005911;GO:0005925;GO:0007044;GO:0007044;GO:0007155;GO:0007155;GO:0007155;GO:0007155;GO:0007157;GO:0007157;GO:0007159;GO:0007159;GO:0007229;GO:0007229;GO:0007565;GO:0007613;GO:0007613;GO:0008305;GO:0008305;GO:0008305;GO:0009897;GO:0009897;GO:0009986;GO:0009986;GO:0010811;GO:…	K06484	-	-	-	integrin subunit alpha 5 [Source:RGD Symbol;Acc:2925]	315346	A0A0G2K1E2
ENSRNOG00000012068	4.34274	8.68548	0	0	-Inf	0.0069594	0.203691	5	74997843	75005567	-	3485	LOC685849	-	-	-	S	13KZ7;1B11F;0IEIZ;1CWTT;0VB7A;0DMXW;0A0B6;0UR5W;192YD	RIKEN cDNA D630039A03 gene [Source:MGI Symbol;Acc:MGI:2442889]	685849	D4A4N9
ENSRNOG00000002229	1905.77	2449.17	1362.36	0.556255	-0.846182	0.00698387	0.204079	11	68695839	68842320	-	4850	Adcy5	GO:0000166;GO:0001973;GO:0004016;GO:0004016;GO:0004016;GO:0004016;GO:0004016;GO:0004016;GO:0005524;GO:0005886;GO:0005886;GO:0005886;GO:0005886;GO:0005929;GO:0006171;GO:0006171;GO:0006171;GO:0006171;GO:0007189;GO:0007189;GO:0007191;GO:0007195;GO:0007204;GO:0007626;GO:0008179;GO:0009190;GO:0009190;GO:0016020;GO:0016020;GO:0016021;GO:0016021;GO:0016829;GO:0016849;GO:0016849;GO:0035556;GO:0035556;GO:…	K08045	EC:4.6.1.1	C	09VH7;12SXH;0V5TX;18SYA;1AXTN;0DEWH;1CT48;0UKZQ;KOG3619	adenylate cyclase 5 [Source:RGD Symbol;Acc:71014]	64532	Q04400
ENSRNOG00000037085	40.9161	19.1749	62.6572	3.26766	1.70826	0.00700702	0.204428	8	128702133	128711221	-	6017	Xirp1	GO:0003779;GO:0030036;GO:0030054;	-	-	S;T;W	0UFU2;0IF8Z;13JMJ;09VV1;1CRTI;18TCV;0V6TQ;0DH39;1AWZY	xin actin-binding repeat containing 1 [Source:RGD Symbol;Acc:1304776]	-	-
ENSRNOG00000049034	91.0876	56.4461	125.729	2.22742	1.15537	0.0070347	0.204907	3	11811962	11825640	+	853	Ptrh1	GO:0004045;GO:0004045;GO:0004045;GO:0004045;	K01056	EC:3.1.1.29	J	KOG2255;0VAND;13P7M;0DMA0;09ZRW;1CW54	peptidyl-tRNA hydrolase 1 homolog [Source:RGD Symbol;Acc:1310165]	362113	-
ENSRNOG00000015992	268.475	0.299434	536.651	1792.22	10.8075	0.00704957	0.20491	9	88918433	88921001	+	787	Ccl20	GO:0002548;GO:0005125;GO:0005125;GO:0005576;GO:0005576;GO:0005576;GO:0005615;GO:0005615;GO:0005615;GO:0006935;GO:0006935;GO:0006954;GO:0006954;GO:0006955;GO:0006955;GO:0007186;GO:0008009;GO:0008009;GO:0008009;GO:0008009;GO:0030593;GO:0031731;GO:0031731;GO:0032730;GO:0035584;GO:0035584;GO:0042060;GO:0043547;GO:0048020;GO:0048247;GO:0051770;GO:0060326;GO:0070098;GO:0070374;GO:0071222;GO:0071223;GO:…	K14625	-	O	13XZQ;0J2BK	C-C motif chemokine ligand 20 [Source:RGD Symbol;Acc:3646]	29538	P97884
ENSRNOG00000016885	432.402	253.643	611.161	2.40953	1.26875	0.00707209	0.20491	17	67887939	67945037	-	2851	Klf6	-	K09207	-	K	KOG1721	Kruppel-like factor 6 [Source:RGD Symbol;Acc:62389]	58954	-
ENSRNOG00000028043	33.9982	0	67.9964	Inf	Inf	0.00707285	0.20491	14	18820168	18839595	-	1466	Cxcl3	GO:0005125;GO:0005576;GO:0005576;GO:0005576;GO:0005615;GO:0005615;GO:0005615;GO:0006935;GO:0006935;GO:0006935;GO:0006952;GO:0006952;GO:0006954;GO:0006954;GO:0006954;GO:0006955;GO:0006955;GO:0007204;GO:0008009;GO:0008009;GO:0008009;GO:0008009;GO:0008009;GO:0030593;GO:0030593;GO:0030593;GO:0032496;GO:0045236;GO:0061844;GO:0070098;GO:0071222;GO:0071222;GO:0005125;GO:0005576;GO:0005576;GO:0005576;GO:…	K05505	-	S;W	0DVJX;1D4WZ;0J3WE;1B6Q4;0VKBQ;13XHT;0A9A4;0UWC6	chemokine (C-X-C motif) ligand 3 [Source:RGD Symbol;Acc:621812]	171551	Q10746
ENSRNOG00000037113	273.53	144.195	402.864	2.79388	1.48227	0.00707983	0.20491	10	70370300	70376331	+	1772	Slfn2	GO:0008285;GO:0009617;	K24457	-	S	1D111;1423J;19473;0A069;1B7CR;0VDXK;0JAUV;0DRSW;0UUIB	schlafen 2 [Source:RGD Symbol;Acc:1308645]	303380	D4A2D6
ENSRNOG00000004540	35.5595	52.4532	18.6658	0.355857	-1.49063	0.00710452	0.205298	8	132241134	132246694	+	823	Clec3b	GO:0001501;GO:0001503;GO:0001503;GO:0001503;GO:0001503;GO:0001652;GO:0001652;GO:0001652;GO:0005509;GO:0005509;GO:0005509;GO:0005615;GO:0005615;GO:0005615;GO:0005615;GO:0005737;GO:0005737;GO:0005737;GO:0008201;GO:0008201;GO:0008201;GO:0010756;GO:0010756;GO:0030246;GO:0030282;GO:0030282;GO:0030282;GO:0030282;GO:0036143;GO:0036143;GO:0071310;GO:0071310;GO:0071560;GO:0071560;	K17520	-	W;T;V	13PCW;0A322;0VD84;192NM;0UGSN;KOG4297;1AY39;0DQIE;1CZKS	C-type lectin domain family 3, member B [Source:RGD Symbol;Acc:1311031]	100912012	D3ZUU6
ENSRNOG00000013794	183.391	123.437	243.345	1.97141	0.979226	0.00712884	0.20541	8	106449321	106470842	+	696	Rbp1	GO:0002138;GO:0005654;GO:0005811;GO:0005829;GO:0005829;GO:0006776;GO:0008289;GO:0030852;GO:0033189;GO:0042572;GO:0042573;	-	-	I	0A6MK;0UV59;KOG4015;1D35Z;192KU;0VHP8;0DTTU;13Q08;1B5Q4	retinol binding protein 1 [Source:RGD Symbol;Acc:3543]	25056	P02696
ENSRNOG00000005600	437.331	592.407	282.255	0.476455	-1.06959	0.00713463	0.20541	3	43111240	43119159	-	3375	Nr4a2	GO:0000122;GO:0000977;GO:0000978;GO:0001228;GO:0001666;GO:0001764;GO:0001975;GO:0003677;GO:0003677;GO:0003677;GO:0003677;GO:0003700;GO:0003700;GO:0004879;GO:0004879;GO:0005634;GO:0005634;GO:0005634;GO:0005634;GO:0005634;GO:0005737;GO:0006351;GO:0006351;GO:0006355;GO:0006355;GO:0006355;GO:0007399;GO:0008270;GO:0008270;GO:0008344;GO:0009791;GO:0010467;GO:0010468;GO:0016607;GO:0021952;GO:0021953;GO:…	K08558	-	K	1AWM7;12N74;19487;0UQPP;1CWCA;09TF3;KOG4217;0V4E5;0DES5	nuclear receptor subfamily 4, group A, member 2 [Source:RGD Symbol;Acc:3202]	54278	Q07917;A0A0G2JSV4;Q3LZI5
ENSRNOG00000017914	325.254	206.327	444.182	2.15281	1.10622	0.00714665	0.20541	1	170317113	170318935	-	1282	Cavin3	GO:0001558;GO:0005080;GO:0005080;GO:0005080;GO:0005737;GO:0005737;GO:0005737;GO:0005737;GO:0005829;GO:0005901;GO:0005901;GO:0005901;GO:0005901;GO:0005901;GO:0005901;GO:0005901;GO:0016020;GO:0030866;GO:0030866;GO:0032922;GO:0032922;GO:0032922;GO:0032991;GO:0032991;GO:0048511;GO:0051898;GO:0051898;GO:0070374;GO:0070374;GO:1901003;GO:1901003;	-	-	T	0IVVG;1CUPN;0UNRJ;18Z6R;1AY82;09YFY;0DJW9;13NYT;0V9DT	caveolae associated protein 3 [Source:RGD Symbol;Acc:628755]	85332	Q9Z1H9
ENSRNOG00000009331	101.938	57.6046	146.271	2.53922	1.34438	0.00715354	0.20541	3	148579920	148623033	+	2061	Hck	GO:0000166;GO:0001784;GO:0002376;GO:0004672;GO:0004672;GO:0004713;GO:0004713;GO:0004713;GO:0004713;GO:0004713;GO:0004714;GO:0004715;GO:0004715;GO:0005102;GO:0005515;GO:0005524;GO:0005524;GO:0005524;GO:0005634;GO:0005737;GO:0005764;GO:0005764;GO:0005794;GO:0005829;GO:0005856;GO:0005884;GO:0005884;GO:0005886;GO:0005886;GO:0005901;GO:0005901;GO:0005925;GO:0005925;GO:0006468;GO:0006468;GO:0006887;GO:…	K08893	EC:2.7.10.2	Z;T	18UEZ;0V4Q4;1AZTR;KOG0197;09TQU;0USB1;1CPQW;0DF11;12NBR	HCK proto-oncogene, Src family tyrosine kinase [Source:RGD Symbol;Acc:2785]	25734	P50545
ENSRNOG00000011829	818.141	1058.34	577.942	0.546083	-0.872807	0.00716846	0.205515	19	17115412	17208055	+	7081	Rpgrip1l	GO:0001701;GO:0001701;GO:0001736;GO:0001736;GO:0001736;GO:0001736;GO:0001822;GO:0001822;GO:0001889;GO:0001889;GO:0003674;GO:0005654;GO:0005737;GO:0005737;GO:0005737;GO:0005813;GO:0005813;GO:0005829;GO:0005879;GO:0005886;GO:0005911;GO:0005911;GO:0005929;GO:0005929;GO:0005929;GO:0005930;GO:0005930;GO:0007163;GO:0007163;GO:0007368;GO:0007368;GO:0007420;GO:0007420;GO:0008150;GO:0008589;GO:0008589;GO:…	K16550	-	S;Z	18Y6H;0A03H;0IGZN;0VAZQ;12TWR;0DMP8;1ATCX;1CWIR;0UP29	Rpgrip1-like [Source:RGD Symbol;Acc:1311099]	307724	D3Z8G3
ENSRNOG00000019142	59.1199	18.2227	100.017	5.48861	2.45644	0.00718514	0.205669	1	252589785	252624790	+	2553	Fas	GO:0004888;GO:0004888;GO:0005515;GO:0005516;GO:0005886;GO:0006915;GO:0006915;GO:0006915;GO:0006955;GO:0006955;GO:0007165;GO:0007165;GO:0016020;GO:0016020;GO:0016020;GO:0016021;GO:0045121;	K04390	-	T	1CTQE;09XME;1B0GF;0J23A;0DIYZ;0V8J4;13V7I;0UMMC;192Y5	Fas cell surface death receptor [Source:RGD Symbol;Acc:619831]	246097	Q63199;F1LWQ2
ENSRNOG00000010922	556.674	390.862	722.485	1.84844	0.886311	0.00725392	0.206699	8	55279373	55301320	+	4089	Ppp2r1b	GO:0000159;GO:0003674;GO:0004722;GO:0005515;GO:0005575;GO:0005737;GO:0006470;GO:0008150;GO:0008287;GO:0019888;GO:0043666;GO:0045121;GO:0045121;GO:0045202;GO:0060561;GO:0060561;GO:0098978;GO:2001241;GO:2001241;	K03456	-	T	0V6QK;194M8;12PFP;0UMTW;09VRN;KOG0211;1CS0R;0DJ4X;1AV8U	protein phosphatase 2 scaffold subunit A beta [Source:RGD Symbol;Acc:1304764]	315648	Q4QQT4
ENSRNOG00000011912	1075.39	1381.67	769.111	0.556653	-0.84515	0.00725458	0.206699	16	18959315	18974770	-	2162	Tmem38a	GO:0005261;GO:0005267;GO:0005267;GO:0006811;GO:0007029;GO:0010881;GO:0014808;GO:0015672;GO:0016020;GO:0016020;GO:0016020;GO:0016021;GO:0016529;GO:0031965;GO:0042802;GO:0042802;GO:0071313;GO:0071805;GO:0071805;GO:0098662;GO:0005261;GO:0005267;GO:0006811;GO:0015672;GO:0016020;GO:0016020;GO:0016020;GO:0016021;GO:0042802;GO:0071805;	K24013	-	P;U	1CXIU;0DNMJ;12RUJ;KOG3944;0URYP;0A101;18S5F;1B3FR;0VBWJ	transmembrane protein 38a [Source:RGD Symbol;Acc:1307901]	306327	A6ZIQ8
ENSRNOG00000014504	255.455	167.336	343.575	2.0532	1.03787	0.00725857	0.206699	9	46962288	47036670	+	3951	Il1r1	GO:0004908;GO:0004908;GO:0004909;GO:0004909;GO:0005515;GO:0007165;GO:0007165;GO:0016020;GO:0016021;GO:0019221;GO:0070498;GO:0002020;GO:0004908;GO:0004908;GO:0004908;GO:0004908;GO:0004909;GO:0004909;GO:0005161;GO:0005515;GO:0007165;GO:0007165;GO:0009897;GO:0009986;GO:0016020;GO:0016020;GO:0016021;GO:0019221;GO:0019966;GO:0032729;GO:0050727;GO:0070498;GO:0070498;GO:0070555;GO:2000391;GO:2000556;GO:…	K04386	-	W;T	1ASFK;0UGRE;0IQBC;18TBI;13MG9;1CQ57;09U5U;0DFFE;0V54U	interleukin 1 receptor type 1 [Source:RGD Symbol;Acc:2892]	25663	Q05KR1
ENSRNOG00000030012	8.95579	1.83007	16.0815	8.78737	3.13543	0.00726655	0.206699	4	155792761	155867708	-	1284	Clec4a2	GO:0030246;	K10057	-	T;V	1953C;0DMIX;13Q9N;1AWSU;0UUEM;KOG4297;0VFYN;1D1TH;0A53A	C-type lectin domain family 4, member A2 [Source:RGD Symbol;Acc:1359163]	297584	Q5YIS1
ENSRNOG00000020229	358.374	245.098	471.649	1.92433	0.944355	0.00733658	0.208366	16	20881518	20890949	-	3420	Homer3	GO:0005829;GO:0008022;GO:0014069;GO:0019904;GO:0035256;GO:0045178;GO:0098962;GO:0098978;GO:0005737;GO:0014069;GO:0030054;GO:0035256;GO:0035256;GO:0045202;	K15010	-	Z;T	13KV4;0DNAI;18V08;0UUAP;0A1HW;0VCDE;1CX7G;1ATK5;0IIX6	homer scaffold protein 3 [Source:RGD Symbol;Acc:620706]	29548	Q9Z2X5
ENSRNOG00000045649	680.147	442.755	917.539	2.07234	1.05126	0.00737741	0.208898	2	8732932	8743069	+	1678	Arrdc3	GO:0001659;GO:0001659;GO:0005737;GO:0005737;GO:0005764;GO:0005768;GO:0005768;GO:0005768;GO:0005768;GO:0005769;GO:0005886;GO:0005886;GO:0005886;GO:0005886;GO:0015031;GO:0016020;GO:0031651;GO:0031651;GO:0031699;GO:0031699;GO:0043588;GO:0043588;GO:0051443;GO:0051443;GO:0060613;GO:0060613;GO:0071878;GO:0071878;GO:0090327;GO:0090327;GO:0120163;GO:0120163;GO:0120163;	-	-	S;T;C	KOG3780;13HFT;1952J;1CQ52;09Z9K;0DFFA;0UR8U;0VA6T;1B08W	arrestin domain containing 3 [Source:RGD Symbol;Acc:1359478]	309945	Q6TXF1
ENSRNOG00000023257	631.258	162.604	1099.91	6.76436	2.75795	0.00737827	0.208898	4	124660262	124858250	-	7965	Adamts9	GO:0003179;GO:0003229;GO:0004175;GO:0004175;GO:0004222;GO:0004222;GO:0004222;GO:0005576;GO:0005615;GO:0005615;GO:0005783;GO:0006508;GO:0006508;GO:0006508;GO:0006508;GO:0006508;GO:0006508;GO:0007229;GO:0008233;GO:0008237;GO:0008237;GO:0008237;GO:0008237;GO:0008237;GO:0008270;GO:0008270;GO:0009617;GO:0009617;GO:0009986;GO:0009986;GO:0010596;GO:0016787;GO:0030198;GO:0030198;GO:0031012;GO:0031012;GO:…	K08624	EC:3.4.24.-	O	18WC0;0V69U;1CU9C;0DJGU;1AZQ6;12PII;09U5N;0UIUN;KOG3538	ADAM metallopeptidase with thrombospondin type 1 motif, 9 [Source:RGD Symbol;Acc:1306889]	312566	D3ZMB0
ENSRNOG00000005374	223.306	147.245	299.366	2.03311	1.02369	0.00743293	0.210119	14	77308204	77321977	-	1781	Lyar	GO:0000122;GO:0000122;GO:0001750;GO:0003677;GO:0003677;GO:0005634;GO:0005654;GO:0005730;GO:0005730;GO:0006364;GO:0033613;GO:0042802;GO:0045824;GO:0045943;GO:0048821;GO:0050766;GO:0140416;GO:0003677;	K15263	-	D	0UMKD;1CXGM;13NTW;KOG2186;0DNJD;0VBUI;18SVV;1B3MP;0A0Y5	Ly1 antibody reactive [Source:RGD Symbol;Acc:1305352]	289707	Q6AYK5
ENSRNOG00000025012	22.8389	40.649	5.02881	0.123713	-3.01493	0.0074661	0.210196	16	8577840	8686131	-	2617	Chat	GO:0016740;GO:0016746;GO:0016746;GO:0016746;GO:0016746;	K00623	EC:2.3.1.6	I	1CVBE;0UJVB;0DPKV;09UUK;0V5U4;KOG3717;12NYF	choline O-acetyltransferase [Source:RGD Symbol;Acc:1304627]	290567	A0A0G2JYQ6
ENSRNOG00000010440	647.735	928.006	367.464	0.395971	-1.33653	0.00746976	0.210196	18	62805410	62944630	+	1716	Gnal	GO:0003924;GO:0005525;GO:0007165;GO:0007186;GO:0019001;GO:0031683;GO:0003924;GO:0005525;GO:0007165;GO:0007186;GO:0019001;GO:0031683;GO:0003924;GO:0003924;GO:0005525;GO:0005525;GO:0007165;GO:0007165;GO:0007165;GO:0007186;GO:0007186;GO:0019001;GO:0019001;GO:0031683;GO:0031683;	K04633	-	F;T	1CQP8;KOG0099;1944X;12Q7M;09UPX;0UHJ6;0DFZT;0V5PH;1AWUQ	G protein subunit alpha L [Source:RGD Symbol;Acc:2715]	24611	P38406
ENSRNOG00000023492	66.717	93.5999	39.8342	0.425579	-1.2325	0.00747029	0.210196	18	1723565	1784233	+	4371	Greb1l	GO:0001822;	-	-	S	0DEIN;13ASJ;0UHSE;09T7F;1CP8H;0V46E;0IF9T	GREB1 like retinoic acid receptor coactivator [Source:RGD Symbol;Acc:1562371]	498819	-
ENSRNOG00000016306	423.247	581.119	265.375	0.456663	-1.1308	0.00748982	0.21042	2	8926850	9504134	-	23017	Adgrv1	GO:0004888;GO:0004930;GO:0005509;GO:0005737;GO:0007154;GO:0007166;GO:0007186;GO:0007194;GO:0007605;GO:0009986;GO:0016021;GO:0043235;GO:0045494;GO:0048496;GO:0050877;GO:0050953;GO:0004930;GO:0007154;GO:0007194;GO:0016021;GO:0001965;GO:0002141;GO:0002142;GO:0004930;GO:0004930;GO:0004930;GO:0005509;GO:0005737;GO:0005886;GO:0007186;GO:0007194;GO:0007194;GO:0007194;GO:0007601;GO:0007605;GO:0009986;GO:…	K18263	-	T;P	KOG1306;12X61;0VY13	adhesion G protein-coupled receptor V1 [Source:RGD Symbol;Acc:1562101]	100362255	-
ENSRNOG00000006747	779.752	1007.57	551.932	0.547784	-0.868321	0.00753102	0.211252	19	25246913	25261946	-	3399	Cc2d1a	GO:0000122;GO:0000978;GO:0000978;GO:0000981;GO:0001227;GO:0001227;GO:0001227;GO:0003677;GO:0005634;GO:0005634;GO:0005634;GO:0005737;GO:0005815;GO:0005856;GO:0006357;GO:1905381;GO:0000122;GO:0000122;GO:0000978;GO:0000978;GO:0000978;GO:0000978;GO:0000981;GO:0001227;GO:0001227;GO:0001227;GO:0001227;GO:0001227;GO:0001650;GO:0003677;GO:0005634;GO:0005634;GO:0005634;GO:0005737;GO:0005815;GO:0005829;GO:…	K18260	-	S;O;K;L	KOG3837;1B0CU;190ZF;09U8D;0V57H;0DGXP;0UIWA;12T8Y;1CRMX	coiled-coil and C2 domain containing 1A [Source:RGD Symbol;Acc:1306108]	288908	Q66HA5
ENSRNOG00000028649	207.638	334.294	80.982	0.242247	-2.04545	0.00756211	0.211475	19	18079094	18188330	+	3178	Tox3	GO:0003682;GO:0003713;GO:0005654;GO:0005829;GO:0042803;GO:0042981;GO:0043524;GO:0045944;GO:0051219;	-	-	K	09X38;18U2D;0DIE9;1B1HI;0UQTC;13RW7;0V81P;KOG0381;1CT4U	TOX high mobility group box family member 3 [Source:RGD Symbol;Acc:1311529]	291908	-
ENSRNOG00000047023	196.948	259.373	134.522	0.518643	-0.947188	0.0075622	0.211475	4	123516788	123557501	-	3007	Aldh1l1	GO:0003824;GO:0003824;GO:0005737;GO:0005737;GO:0005829;GO:0006730;GO:0006730;GO:0006730;GO:0009058;GO:0009058;GO:0009258;GO:0009258;GO:0009258;GO:0016155;GO:0016155;GO:0016155;GO:0016155;GO:0016491;GO:0016491;GO:0016491;GO:0016620;GO:0016620;GO:0016742;GO:0016742;GO:0055114;GO:0003824;GO:0003824;GO:0005737;GO:0005737;GO:0006730;GO:0006730;GO:0006730;GO:0009058;GO:0009058;GO:0009258;GO:0009258;GO:…	K00289	EC:1.5.1.6	F	KOG2452	aldehyde dehydrogenase 1 family, member L1 [Source:RGD Symbol;Acc:621294]	64392	P28037
ENSRNOG00000014426	733.991	224.374	1243.61	5.54256	2.47055	0.00759665	0.212112	18	47500330	47577819	-	4807	Lox	GO:0001568;GO:0001649;GO:0001932;GO:0004720;GO:0004720;GO:0005507;GO:0005518;GO:0005576;GO:0005581;GO:0005615;GO:0007507;GO:0010468;GO:0016202;GO:0016641;GO:0017015;GO:0018057;GO:0030199;GO:0030282;GO:0030324;GO:0031012;GO:0035791;GO:0035904;GO:0035905;GO:0035906;GO:0042981;GO:0043491;GO:0045652;GO:0046716;GO:0048251;GO:0048514;GO:0048747;GO:0055114;GO:0060326;GO:0061448;GO:0071310;GO:0071897;GO:…	K00277	EC:1.4.3.13	O;W	0DKQN;0VA5U;1CVJ5;13KN2;0IHTH;195CU;0UJBD;09Z8H;1AUUF	lysyl oxidase [Source:RGD Symbol;Acc:3015]	24914	P16636
ENSRNOG00000007905	325.203	425.869	224.536	0.527242	-0.923462	0.0076715	0.213596	7	3355116	3384675	+	5064	Itga7	GO:0007155;GO:0008305;GO:0007155;GO:0008305;	K06583	-	W	1DEZJ;0WGDU;1974M;0B3YQ;1BAVW;0IPBB;13CB5;0V2Z4;0E804	integrin subunit alpha 7 [Source:RGD Symbol;Acc:71022]	81008	Q63258
ENSRNOG00000018659	455.795	296.412	615.177	2.07541	1.0534	0.00767326	0.213596	2	210522375	210550560	-	4048	Csf1	GO:0001503;GO:0001954;GO:0002158;GO:0002376;GO:0002931;GO:0003006;GO:0005125;GO:0005125;GO:0005125;GO:0005125;GO:0005125;GO:0005157;GO:0005576;GO:0005615;GO:0005615;GO:0005615;GO:0005886;GO:0006954;GO:0007169;GO:0008083;GO:0008083;GO:0008083;GO:0008083;GO:0008283;GO:0008284;GO:0010628;GO:0010744;GO:0010759;GO:0016020;GO:0016021;GO:0016021;GO:0016021;GO:0030225;GO:0030278;GO:0030316;GO:0030316;GO:…	K05453	-	W;T	0II8R;13FAW;0UTJ9;1CZBK;0A2N7;0DQ9T;1B4AV;190U3;0V4DB	colony stimulating factor 1 [Source:RGD Symbol;Acc:621063]	78965	Q6GMN4
ENSRNOG00000000897	42.6271	22.3609	62.8932	2.81264	1.49192	0.00769125	0.213759	12	6016884	6078411	-	2214	Rxfp2	GO:0001556;GO:0004930;GO:0004930;GO:0004930;GO:0005515;GO:0005886;GO:0005886;GO:0005887;GO:0007165;GO:0007165;GO:0007165;GO:0007186;GO:0007186;GO:0007186;GO:0007189;GO:0007189;GO:0007189;GO:0007190;GO:0007193;GO:0008285;GO:0008528;GO:0008584;GO:0008584;GO:0009755;GO:0016020;GO:0016020;GO:0016020;GO:0016021;GO:0016021;GO:0016021;GO:0016500;GO:0016500;GO:0017046;GO:0043066;GO:0043950;	K04307	-	T	KOG0619;0E9KI;0V3XR;13G8H;0B6HY;0WJ8I;KOG2087;197HD;1DGFF;1BBK2	relaxin family peptide receptor 2 [Source:RGD Symbol;Acc:1309449]	363866	Q5ECL0
ENSRNOG00000012273	2277.56	2918.04	1637.08	0.56102	-0.833876	0.00770259	0.213759	15	52292765	52320385	-	3370	Dmtn	GO:0003779;GO:0005102;GO:0005829;GO:0005884;GO:0005886;GO:0005886;GO:0008360;GO:0010591;GO:0010763;GO:0010801;GO:0010812;GO:0014069;GO:0014731;GO:0015629;GO:0016020;GO:0030032;GO:0030036;GO:0030194;GO:0030507;GO:0030863;GO:0031095;GO:0031253;GO:0031410;GO:0032956;GO:0033137;GO:0035584;GO:0035585;GO:0043621;GO:0048471;GO:0048821;GO:0050732;GO:0051015;GO:0051017;GO:0051489;GO:0051895;GO:0065003;GO:…	-	-	Z	KOG1044	dematin actin binding protein [Source:RGD Symbol;Acc:1311419]	361069	D4A559
ENSRNOG00000059507	89.0316	124.199	53.8643	0.433694	-1.20525	0.00772944	0.214177	3	9267122	9326993	-	4749	Lamc3	GO:0000904;GO:0000904;GO:0005604;GO:0005604;GO:0005604;GO:0005604;GO:0007601;GO:0007601;GO:0009887;GO:0009888;GO:0014002;GO:0014002;GO:0016020;GO:0016477;GO:0034446;GO:0060041;GO:0060041;	K06247	-	-	-	laminin subunit gamma 3 [Source:RGD Symbol;Acc:1309399]	311862	-
ENSRNOG00000013194	982.007	1272.74	691.274	0.543139	-0.880607	0.00776425	0.214815	1	53360157	53499445	+	5396	Rps6ka2	GO:0000166;GO:0000287;GO:0000287;GO:0001556;GO:0001556;GO:0002035;GO:0002035;GO:0004672;GO:0004672;GO:0004672;GO:0004672;GO:0004674;GO:0004674;GO:0004674;GO:0004674;GO:0004674;GO:0004674;GO:0004711;GO:0004711;GO:0004711;GO:0004711;GO:0004711;GO:0004712;GO:0004712;GO:0005524;GO:0005524;GO:0005524;GO:0005634;GO:0005634;GO:0005654;GO:0005654;GO:0005737;GO:0005737;GO:0005737;GO:0005737;GO:0005819;GO:…	K04373	EC:2.7.11.1	T;D	18SMN;0V44X;0UNKI;1CP76;KOG0598;12P0N;1B1U5;0DEHF;09T66	ribosomal protein S6 kinase A2 [Source:RGD Symbol;Acc:620676]	117269	F1M7N7
ENSRNOG00000022533	57.8572	33.2873	82.4272	2.47624	1.30815	0.00778925	0.215179	12	16988136	17016791	+	3225	Micall2	GO:0005515;GO:0032456;GO:0005515;GO:0031005;GO:0032456;	K21068	-	Z	13I9X;1B00Q;0VAAH;09ZDG;1CVR0;0UQA6;0IKSW;0DKVW;190QA	MICAL-like 2 [Source:RGD Symbol;Acc:1307875]	288515	A0A0G2K365
ENSRNOG00000043088	5.07283	0	10.1457	Inf	Inf	0.00781069	0.215445	1	80800951	80809769	-	2024	Ceacam19	GO:0016020;GO:0016021;	K16825	-	S	1D1K1;1966H;1B4JI;0DQQH;0VEYT;0A3W5;0UU5Z;0IUSJ;13KWV	CEA cell adhesion molecule 19 [Source:RGD Symbol;Acc:1589436]	680640	D3ZE93
ENSRNOG00000013813	115.247	73.7407	156.753	2.12574	1.08796	0.00784125	0.215961	1	261229347	261280536	+	1854	Ubtd1	GO:0005515;	-	-	O	KOG0013;0DHAA;194YR;09W15;0V6ZG;0UNUD;1CS09;12TRY;1ASSD	ubiquitin domain containing 1 [Source:RGD Symbol;Acc:1308172]	309373	Q68FV8
ENSRNOG00000014011	168.986	61.4995	276.472	4.49551	2.16849	0.00786586	0.216311	3	111135021	111145986	+	4561	Dll4	GO:0000122;GO:0001525;GO:0001569;GO:0001974;GO:0003208;GO:0003209;GO:0003222;GO:0003344;GO:0005112;GO:0005509;GO:0007154;GO:0007219;GO:0007219;GO:0007275;GO:0008285;GO:0010596;GO:0010628;GO:0010629;GO:0016020;GO:0016021;GO:0030217;GO:0035912;GO:0035924;GO:0043537;GO:0044344;GO:0045746;GO:0045747;GO:0050767;GO:0060579;GO:0061074;GO:0061314;GO:0072554;GO:0090051;GO:1903588;GO:2000179;	K06051	-	T	0DI6N;1B0VC;KOG1217;0UFDP;18Z90;09ZC6;0VA9C;12PNX;1CVPJ	delta like canonical Notch ligand 4 [Source:RGD Symbol;Acc:1309740]	311332	-
ENSRNOG00000027784	110.203	61.4175	158.988	2.58864	1.3722	0.00791187	0.217248	1	163317282	163328591	-	2573	Tsku	GO:0005515;GO:0005615;GO:0008203;GO:0010468;GO:0010977;GO:0021540;GO:0021670;GO:0021766;GO:0021960;GO:0030178;GO:0032911;GO:0033344;GO:0042060;GO:0042632;GO:0042635;GO:0043010;GO:0050431;GO:0060122;GO:0061073;GO:0097009;GO:1904761;	K08130	-	T	1ASKI;KOG0619;137ET;0V58N;1CQ8Y;09U9H;0DFJ7;18Y56;0UGX7	tsukushi, small leucine rich proteoglycan [Source:RGD Symbol;Acc:1359311]	308843	Q6QMY6
ENSRNOG00000005960	444.66	678.4	210.921	0.31091	-1.68543	0.00793664	0.2176	8	43315592	43336304	-	3591	RGD1311744	-	-	-	-	-	similar to RIKEN cDNA 5830475I06 [Source:RGD Symbol;Acc:1311744]	-	-
ENSRNOG00000033915	262.375	344.511	180.238	0.523171	-0.934646	0.00803614	0.219997	7	117759083	117761931	+	1740	Gpt	GO:0003824;GO:0003824;GO:0004021;GO:0004021;GO:0004021;GO:0005615;GO:0005615;GO:0005737;GO:0005737;GO:0008483;GO:0009058;GO:0009058;GO:0016740;GO:0030170;GO:0030170;GO:0030170;GO:0032869;GO:0042594;GO:0042853;GO:0045722;	K00814	EC:2.6.1.2	E	18YG4;1CSIX;0UFQ1;KOG0258;0DHUE;09WYD;0V7Y4;1AVKB;12PIT	glutamic--pyruvic transaminase [Source:RGD Symbol;Acc:621720]	81670	P25409
ENSRNOG00000054251	35.7829	8.63141	62.9344	7.29133	2.86618	0.0080942	0.221133	4	163216163	163227334	-	2518	Clec7a	GO:0001872;GO:0001872;GO:0001872;GO:0001872;GO:0001872;GO:0002366;GO:0002720;GO:0002732;GO:0005737;GO:0005737;GO:0006910;GO:0006910;GO:0006910;GO:0008037;GO:0008037;GO:0008284;GO:0008284;GO:0008284;GO:0009986;GO:0009986;GO:0009986;GO:0010628;GO:0010628;GO:0016020;GO:0016021;GO:0016046;GO:0016046;GO:0016046;GO:0030246;GO:0030246;GO:0030246;GO:0030335;GO:0030335;GO:0030335;GO:0031334;GO:0031334;GO:…	K10074	-	-	-	C-type lectin domain containing 7A [Source:RGD Symbol;Acc:1565140]	502902	B5BUZ1;B2RYG9
ENSRNOG00000030628	4170.69	3029.33	5312.05	1.75354	0.810272	0.00810194	0.221133	10	56271257	56276764	-	1770	Eif4a1	GO:0000166;GO:0002183;GO:0003674;GO:0003676;GO:0003676;GO:0003724;GO:0003725;GO:0003725;GO:0003743;GO:0003743;GO:0004386;GO:0004386;GO:0004386;GO:0005524;GO:0005524;GO:0005524;GO:0005575;GO:0005737;GO:0005737;GO:0006413;GO:0008150;GO:0016787;	K03257	-	J	KOG0327	eukaryotic translation initiation factor 4A1 [Source:RGD Symbol;Acc:735141]	287436	Q6P3V8
ENSRNOG00000011932	356.266	227.167	485.366	2.13661	1.09532	0.00815489	0.22193	1	126961389	126974453	+	1270	Snrpa1	GO:0000398;GO:0005515;GO:0005634;GO:0005654;GO:0005681;GO:0005686;GO:0007283;GO:0016604;GO:0016607;GO:0071005;GO:0071007;GO:0071013;GO:0000398;GO:0000398;GO:0000398;GO:0003674;GO:0005515;GO:0005575;GO:0005634;GO:0005681;GO:0005686;GO:0005686;GO:0007283;GO:0008150;GO:0030620;GO:0030620;GO:0071005;GO:0071007;GO:0071013;	K11092	-	A	09YIZ;KOG1644;1AYMJ;0V9GQ;18XA3;0UP2V;12R8Y;0DMW9;1CWRU	small nuclear ribonucleoprotein polypeptide A' [Source:RGD Symbol;Acc:2320494]	100361269	D3ZZR5
ENSRNOG00000030930	22.5404	9.07043	36.0103	3.97008	1.98917	0.00815552	0.22193	11	14253848	14304725	-	1440	Samsn1	GO:0001784;GO:0001784;GO:0001784;GO:0002820;GO:0002820;GO:0005515;GO:0005634;GO:0005634;GO:0005634;GO:0005634;GO:0005737;GO:0005829;GO:0005829;GO:0050732;GO:0050732;GO:0050732;GO:0050869;GO:0050869;GO:0050869;GO:0005515;	K23707	-	T	1CTEN;0UM98;1AVJG;12QFT;0V4V9;KOG4384;0DIPN;09XC7;18WJV	SAM domain, SH3 domain and nuclear localization signals, 1 [Source:RGD Symbol;Acc:620926]	170637	A0A0G2K960
ENSRNOG00000004693	635.479	827.265	443.693	0.536338	-0.898786	0.00820484	0.222939	13	86390741	86451002	-	2203	Pbx1	GO:0000976;GO:0000977;GO:0000977;GO:0000978;GO:0000978;GO:0000981;GO:0000981;GO:0000981;GO:0001228;GO:0001654;GO:0001655;GO:0001658;GO:0003674;GO:0003677;GO:0003677;GO:0003677;GO:0003677;GO:0003677;GO:0003700;GO:0003700;GO:0005575;GO:0005634;GO:0005634;GO:0005634;GO:0005634;GO:0005634;GO:0005654;GO:0005667;GO:0005737;GO:0005737;GO:0006355;GO:0006355;GO:0006357;GO:0007420;GO:0008150;GO:0008284;GO:…	-	-	K	1CRZ0;KOG0774;195SF;0UGWF;0DH91;1B1DB;09TFK;12PKU;0V4EP	PBX homeobox 1 [Source:RGD Symbol;Acc:1308213]	-	-
ENSRNOG00000039544	117.939	160.246	75.6321	0.471976	-1.08321	0.00821914	0.222995	X	15506724	15520712	-	3712	Kcnd1	GO:0005216;GO:0005216;GO:0005244;GO:0005249;GO:0005249;GO:0005249;GO:0005250;GO:0005267;GO:0005515;GO:0005515;GO:0006811;GO:0006811;GO:0006811;GO:0006813;GO:0006813;GO:0006813;GO:0008076;GO:0008076;GO:0008076;GO:0014069;GO:0016020;GO:0016020;GO:0016020;GO:0016021;GO:0016021;GO:0030425;GO:0034765;GO:0042995;GO:0043025;GO:0043197;GO:0045211;GO:0051260;GO:0051260;GO:0055085;GO:0055085;GO:0071805;GO:…	K04891	-	P	09VDE;0DGMW;1CRNY;1AUF0;18T1H;0V6CD;0UIXY;KOG4390;13I54	potassium voltage-gated channel subfamily D member 1 [Source:RGD Symbol;Acc:621364]	116695	D3ZYK3
ENSRNOG00000019961	745.837	962.098	529.577	0.550439	-0.861345	0.00828063	0.22422	9	17846364	17866927	-	4905	Tcte1	GO:0005515;GO:0030317;GO:0030317;GO:0036126;GO:0036126;	-	-	T	KOG0619;194A6;0DEJX;12N3S;09T8T;1B3Y5;0V47R;1CP9U;0UFIU	t-complex-associated testis expressed 1 [Source:RGD Symbol;Acc:1305744]	316242	D3ZQW5
ENSRNOG00000003800	227.262	341.893	112.631	0.329433	-1.60194	0.00828894	0.22422	10	97509971	97582188	-	2423	Rgs9	GO:0007186;GO:0035556;GO:0098839;GO:0098978;	K13765	-	T	0UKJI;09WW3;0DI6C;1ASJ5;1CSWR;0V7U5;12RNH;18YDM;KOG3589	regulator of G-protein signaling 9 [Source:RGD Symbol;Acc:3572]	29481	P49805
ENSRNOG00000004772	15.2157	5.33954	25.0918	4.69924	2.23243	0.00834944	0.22541	3	44150992	44177689	-	1664	Cytip	GO:0005515;GO:0005654;GO:0005737;GO:0005737;GO:0005737;GO:0005768;GO:0005769;GO:0005829;GO:0005938;GO:0005938;GO:0005938;GO:0030155;GO:0030155;GO:0030155;	-	-	O	197EX;0ITA8;0E9C3;13FTJ;1DG7F;0B66B;0WIW1;0V3RU;1BBF6	cytohesin 1 interacting protein [Source:RGD Symbol;Acc:1307990]	311047	Q5I0L6
ENSRNOG00000033134	3491.7	5215.41	1767.99	0.338993	-1.56067	0.00835769	0.22541	2	11658568	11822787	+	6451	Mef2c	GO:0000977;GO:0000977;GO:0003677;GO:0003677;GO:0003677;GO:0005634;GO:0045944;GO:0045944;GO:0046983;GO:0046983;GO:0000122;GO:0000165;GO:0000977;GO:0000977;GO:0000977;GO:0000981;GO:0001228;GO:0003677;GO:0003677;GO:0003677;GO:0003680;GO:0003700;GO:0005634;GO:0005634;GO:0005654;GO:0005737;GO:0006355;GO:0007507;GO:0010628;GO:0014902;GO:0016607;GO:0030182;GO:0030279;GO:0032991;GO:0033613;GO:0043231;GO:…	K04454	-	-	-	myocyte enhancer factor 2C [Source:RGD Symbol;Acc:1563119]	499497	A0A096MJY4
ENSRNOG00000029798	744.945	959.871	530.02	0.552179	-0.856793	0.00838735	0.225599	3	85421426	86819375	+	2948	Lrrc4c	GO:0003674;GO:0005515;GO:0005575;GO:0008150;GO:0016020;GO:0016020;GO:0016020;GO:0016021;GO:0050770;GO:0050770;GO:0050804;GO:0050804;GO:0050839;GO:0050839;GO:0098632;GO:0098632;GO:0098685;GO:0098685;GO:0098978;GO:0098978;GO:0099061;GO:0099061;GO:0099560;GO:0099560;GO:0099560;	K07523	-	T	12QDS;KOG0619;18ZQH;0UPSH;09WDM;0DHNT;1ARF5;1CSD7;0V7BZ	leucine rich repeat containing 4C [Source:RGD Symbol;Acc:1311013]	311236	D3ZXT1
ENSRNOG00000023005	10.1829	1.51206	18.8537	12.4689	3.64026	0.00839711	0.225599	X	80359555	80363168	+	2717	LOC681325	GO:0034121;GO:0034121;GO:0035751;	-	-	S	0IVMI;1CZX6;0A365;1AU7J;0DQTI;195VU;13IGV;0UQ4U;0VE12	predicted gene 6377 [Source:MGI Symbol;Acc:MGI:3647255]	681325	D4A907
ENSRNOG00000046366	1068.44	1369.05	767.82	0.560841	-0.834335	0.00840186	0.225599	X	51286737	53519259	+	13961	Dmd	GO:0001954;GO:0002027;GO:0005515;GO:0005886;GO:0006355;GO:0007517;GO:0007519;GO:0008065;GO:0008270;GO:0010468;GO:0010880;GO:0010881;GO:0014809;GO:0014819;GO:0014904;GO:0016010;GO:0021629;GO:0030018;GO:0030054;GO:0030055;GO:0033137;GO:0034613;GO:0034622;GO:0035994;GO:0042383;GO:0042391;GO:0044306;GO:0045121;GO:0045202;GO:0045213;GO:0046716;GO:0048747;GO:0050998;GO:0051647;GO:0060314;GO:0060857;GO:…	-	-	Z;T;N	0VBQH;12PKW;KOG4286;0A0TT;0DK8P;18ZT6;0VBQH;1CV2H;0UP5N;12PKW;KOG4286;1AYQY;0A0TT;0DK8P;1CT9K;09X7K;0V866;0IME6;12ZRR;0DIJ3;0UM3I	dystrophin [Source:RGD Symbol;Acc:2507]	24907	Q7TPH3
ENSRNOG00000011913	1192.46	708.81	1676.11	2.36468	1.24164	0.00846756	0.227028	2	104744461	104799853	+	3792	Cp	GO:0005507;GO:0005507;GO:0006811;GO:0016491;GO:0016491;GO:0016491;GO:0046872;GO:0055114;GO:0005507;GO:0005507;GO:0005615;GO:0006811;GO:0016491;GO:0016491;GO:0016491;GO:0046872;GO:0051087;GO:0055114;	K13624	EC:1.16.3.1	Q	09WF8;192EK;0UPN2;KOG1263;12Q6R;1AZC8;1CSYR;0DI8B;0V7VZ	ceruloplasmin [Source:RGD Symbol;Acc:2387]	24268	A0A0G2K9I6
ENSRNOG00000007541	75.186	33.4641	116.908	3.49352	1.80468	0.00858883	0.229871	5	142689026	142696383	+	1673	Fhl3	GO:0001725;GO:0001725;GO:0001725;GO:0003712;GO:0003779;GO:0003779;GO:0003779;GO:0005634;GO:0005634;GO:0005634;GO:0030018;GO:0030018;GO:0030018;GO:0030036;GO:0030036;GO:0030036;GO:0046872;	K24414	-	Z;T	KOG1704;12QMN;1AY5M;09VZI;1CRYF;0UHJ7;0DH8A;19206;0V6XY	four and a half LIM domains 3 [Source:RGD Symbol;Acc:1307180]	313582	D3ZPF0
ENSRNOG00000014872	398.11	279.132	517.087	1.85248	0.88946	0.00859887	0.229871	2	227455722	227562319	+	3405	Sec24d	GO:0000149;GO:0001701;GO:0006886;GO:0006888;GO:0006888;GO:0008270;GO:0008270;GO:0030127;GO:0030127;GO:0043231;GO:0090110;	K14007	-	U	KOG1984	SEC24 homolog D, COPII coat complex component [Source:RGD Symbol;Acc:1311720]	310843	A0A0G2QC63
ENSRNOG00000023337	158.581	264.869	52.294	0.197434	-2.34056	0.0086934	0.232058	4	18178656	18396035	-	3387	Sema3a	GO:0001764;GO:0002027;GO:0005515;GO:0007411;GO:0007413;GO:0008045;GO:0010633;GO:0010977;GO:0021612;GO:0021637;GO:0021675;GO:0021772;GO:0021785;GO:0021828;GO:0030215;GO:0030215;GO:0030517;GO:0036486;GO:0038191;GO:0045499;GO:0048813;GO:0048841;GO:0048841;GO:0048843;GO:0048846;GO:0050919;GO:0060385;GO:0060666;GO:0061549;GO:0061551;GO:0071526;GO:0097490;GO:0097491;GO:0150020;GO:1901166;GO:1902285;GO:…	K06840	-	T	09YQF;0DFQ0;1CQDK;0V9N8;12RKU;1ASSR;0UH3Z;18XZJ;KOG3611	semaphorin 3A [Source:RGD Symbol;Acc:3657]	29751	Q63548
ENSRNOG00000005731	139.086	16.8706	261.302	15.4886	3.95314	0.00870674	0.232073	8	6048969	6076598	-	2263	Birc3	GO:0004842;GO:0005634;GO:0005634;GO:0005634;GO:0005737;GO:0005737;GO:0005737;GO:0006915;GO:0007283;GO:0016567;GO:0016740;GO:0031398;GO:0031398;GO:0032991;GO:0042326;GO:0042981;GO:0042981;GO:0042981;GO:0043027;GO:0043066;GO:0043066;GO:0043154;GO:0044877;GO:0045121;GO:0046872;GO:0051726;GO:0060544;GO:0060546;GO:0060546;GO:0061630;GO:0070266;GO:0071356;GO:1901222;GO:1902916;GO:2000378;GO:0004842;GO:…	K16060	-	O;T;D	09XU3;13HTW;KOG1101;1AXBT;0DJ69;0UH8Q;0V8RR;1CTY4;194HC	baculoviral IAP repeat-containing 3 [Source:RGD Symbol;Acc:621282]	78971	Q5XIW4;F7FLN8
ENSRNOG00000023458	691.719	930.829	452.61	0.486244	-1.04025	0.00872253	0.232154	X	131340045	131343853	-	3530	Dcaf12l1	GO:0003674;GO:0005515;GO:0005575;GO:0008150;GO:0080008;	-	-	S	12STZ;1CWQG;0VB4C;18TUP;0UR2A;0DMUX;0IGRG;0A08C;1AXZ0	DDB1 and CUL4 associated factor 12-like 1 [Source:RGD Symbol;Acc:1563873]	-	-
ENSRNOG00000057832	51.2939	18.0869	84.501	4.67194	2.22402	0.00880817	0.234091	18	15192962	15225427	-	1376	Rnf125	GO:0000139;GO:0000209;GO:0002039;GO:0006511;GO:0008270;GO:0031624;GO:0032480;GO:0034098;GO:0039536;GO:0043231;GO:0061630;GO:1990830;	K12170	EC:2.3.2.27	-	-	ring finger protein 125 [Source:RGD Symbol;Acc:1306757]	361296	B1WCA3
ENSRNOG00000012698	671.537	442.441	900.633	2.0356	1.02545	0.00886308	0.2349	1	127010588	127071570	+	3760	Chsy1	GO:0002063;GO:0002063;GO:0003674;GO:0005575;GO:0005576;GO:0005576;GO:0005794;GO:0008376;GO:0008376;GO:0008376;GO:0009954;GO:0009954;GO:0016020;GO:0016021;GO:0016740;GO:0016757;GO:0016757;GO:0030206;GO:0030206;GO:0030206;GO:0030206;GO:0030279;GO:0030279;GO:0031667;GO:0032580;GO:0032580;GO:0032580;GO:0045880;GO:0045880;GO:0047238;GO:0047238;GO:0047238;GO:0050510;GO:0050510;GO:0051216;GO:0051216;GO:…	K13499	-	G	09YA9;12R1H;0V97R;18S7B;1AXGC;1CUGQ;0UMZY;KOG3588;0DJPT	chondroitin sulfate synthase 1 [Source:RGD Symbol;Acc:1311904]	292999	D3ZRM3
ENSRNOG00000032002	489.992	652.881	327.103	0.501015	-0.997075	0.00886515	0.2349	2	18354542	18419071	+	5089	Hapln1	GO:0005540;GO:0007155;GO:0005540;GO:0007155;GO:0031012;GO:0045202;	K06848	-	W;T	09WUU;1ATYH;1CSV6;0V7ST;18UZN;0UKHM;0IF28;12Q1T;0DI4S	hyaluronan and proteoglycan link protein 1 [Source:RGD Symbol;Acc:2412]	29331	A1A5N6
ENSRNOG00000033741	571.543	738.828	404.259	0.547162	-0.869959	0.0088773	0.2349	2	198721724	198725154	+	2863	Ankrd34a	GO:0005515;	-	-	S	1CPRS;0DF1Z;18ST6;0IJTU;0V4QY;09TRM;0UG6H;1ARZN;13H7P	ankyrin repeat domain 34A [Source:RGD Symbol;Acc:1308412]	295283	Q5BJT1
ENSRNOG00000002794	38.74	5.18709	72.293	13.9371	3.80086	0.00894845	0.236413	13	82429063	82464628	+	3182	Selp	GO:0001530;GO:0002687;GO:0005509;GO:0005615;GO:0005886;GO:0005887;GO:0006954;GO:0007155;GO:0007155;GO:0007155;GO:0007157;GO:0007159;GO:0007159;GO:0008201;GO:0009897;GO:0009897;GO:0010572;GO:0014068;GO:0016020;GO:0016020;GO:0016020;GO:0016020;GO:0016021;GO:0016339;GO:0030246;GO:0031092;GO:0033623;GO:0033691;GO:0033691;GO:0035584;GO:0042806;GO:0046872;GO:0048306;GO:0050900;GO:0050901;GO:0050901;GO:…	K06496	-	T;V	0E9VB;1BB8S;0WJTD;0IS44;1DGP4;0V428;197BT;13EQ3;0B700	selectin P [Source:RGD Symbol;Acc:3656]	25651	P98106
ENSRNOG00000032656	512.534	662.499	362.57	0.547277	-0.869658	0.00896046	0.236413	3	157544583	158328881	-	3807	Ptprt	GO:0003674;GO:0004721;GO:0004725;GO:0004725;GO:0004725;GO:0004725;GO:0004725;GO:0004725;GO:0004725;GO:0005001;GO:0005515;GO:0005575;GO:0005886;GO:0005887;GO:0006470;GO:0006470;GO:0006470;GO:0006470;GO:0006470;GO:0007156;GO:0007169;GO:0008013;GO:0008013;GO:0008150;GO:0009986;GO:0016020;GO:0016020;GO:0016020;GO:0016021;GO:0016311;GO:0016311;GO:0016787;GO:0016790;GO:0016790;GO:0016791;GO:0016791;GO:…	K13297	EC:3.1.3.48	T	1CU3F;KOG4228;0DJB7;13DXY;0V8W3;09V8F	protein tyrosine phosphatase, receptor type, T [Source:RGD Symbol;Acc:1309653]	362263	F1LXJ9
ENSRNOG00000025051	90.4311	56.3641	124.498	2.20882	1.14327	0.00901344	0.237381	5	133864798	133878830	+	4915	Tal1	GO:0000118;GO:0000118;GO:0000122;GO:0000122;GO:0000785;GO:0000785;GO:0000976;GO:0000976;GO:0000978;GO:0000978;GO:0000978;GO:0000981;GO:0000981;GO:0000981;GO:0000981;GO:0001085;GO:0001085;GO:0001525;GO:0001525;GO:0003674;GO:0003677;GO:0003677;GO:0003677;GO:0003682;GO:0003682;GO:0003682;GO:0003700;GO:0003700;GO:0005575;GO:0005634;GO:0005634;GO:0005634;GO:0005654;GO:0005667;GO:0005667;GO:0005667;GO:…	K09068	-	K	1CYEE;0UPC5;KOG4029;13W7N;0A1TT;0DPG3;0VCPJ	TAL bHLH transcription factor 1, erythroid differentiation factor [Source:RGD Symbol;Acc:1306748]	313507	D3Z921
ENSRNOG00000007894	1832.03	2358.85	1305.2	0.55332	-0.853815	0.00903608	0.237381	5	99413187	99566318	-	7543	Mpdz	GO:0005515;GO:0005737;GO:0008022;GO:0016327;GO:0005515;	K06095	-	O;T;W	0UI7A;18UEU;0DJ9C;12QPR;0V8P7;KOG3528;1B0Z7;1CU1C;09XRI	multiple PDZ domain crumbs cell polarity complex component [Source:RGD Symbol;Acc:3105]	29365	O55164
ENSRNOG00000026309	10.0363	17.7299	2.34272	0.132134	-2.91993	0.00903627	0.237381	4	157294287	157304653	-	1693	LOC100911585	GO:0005515;GO:0005829;	-	-	T	0VBDW;0A0HR;0URJ9;1CX16;12SVI;0DN4Q;1B4Z5;191V5;KOG0531	leucine-rich repeat-containing protein 23-like [Source:RGD Symbol;Acc:6491966]	312707	G3V9K7;Q6AYI9
ENSRNOG00000022507	1346.37	974.831	1717.91	1.76226	0.81743	0.00909016	0.237873	7	135838648	135850542	-	2874	Twf1	GO:0003779;GO:0003779;GO:0003785;GO:0005524;GO:0005546;GO:0005730;GO:0005829;GO:0005911;GO:0010613;GO:0015629;GO:0030016;GO:0030175;GO:0030837;GO:0030837;GO:0032587;GO:0042989;GO:0043538;GO:0044877;GO:0048471;GO:0051016;	K08870	-	Z;W	1CQPZ;09U30;KOG1747;0UU1G;12NHS;1AYCG;0DNKE;0V521;18WBB	twinfilin actin-binding protein 1 [Source:RGD Symbol;Acc:1311872]	315265	Q5RJR2
ENSRNOG00000019264	379.749	220.524	538.973	2.44405	1.28928	0.00909897	0.237873	4	157822840	157829241	-	2075	Ltbr	GO:0005515;GO:0005794;GO:0006955;GO:0006955;GO:0016020;GO:0016021;GO:0031625;GO:0031625;GO:0031625;GO:0042802;GO:0042802;GO:0043011;GO:0043011;GO:0043123;GO:0043123;GO:0043123;GO:0043123;GO:0043123;GO:0046330;GO:0046330;GO:0048534;GO:0048534;GO:0071260;GO:0071260;GO:2001238;GO:2001238;	K03159	-	T	09XE6;0DIRS;0UMC3;0IKNN;1CTGX;12SC4;0V8C8;191FK;1AV3M	lymphotoxin beta receptor [Source:RGD Symbol;Acc:1309448]	297604	Q5U2S8
ENSRNOG00000010478	1402.8	30.6722	2774.92	90.4702	6.49937	0.00910455	0.237873	6	127941526	128080889	+	7022	LOC299282	GO:0005615;GO:0005615;GO:0005615;GO:0005615;GO:0005615;GO:0005615;GO:0005615;GO:0005615;GO:0005615;GO:0005615;GO:0005615;GO:0005615;GO:0005615;GO:0005615;	K04525	-	V	0UM4R;1B1G0;09U5H;KOG2392;12R4F;0V54I;1CQ4S;0DFF0;18T05;KOG2392;KOG2392;KOG1075	Serine protease inhibitor [Source:RGD Symbol;Acc:3745]	24795	P09006
ENSRNOG00000003148	3127.86	4000.64	2255.07	0.563679	-0.827054	0.00910725	0.237873	10	107338465	107386072	-	1661	Timp2	GO:0002020;GO:0005515;GO:0008191;GO:0008270;GO:0010951;GO:0030414;GO:1905049;	K22583	-	O;W	0DGSG;09VHV;0V6H4;18ZJR;1B3XK;1CRGJ;12TRZ;KOG4745;0UINJ	TIMP metallopeptidase inhibitor 2 [Source:RGD Symbol;Acc:61312]	29543	P30121
ENSRNOG00000000500	57.7763	82.296	33.2565	0.404109	-1.30718	0.00913712	0.237942	20	7718282	7746331	+	2985	Scube3	GO:0005509;GO:0005886;GO:0009986;GO:0042802;	K24468	-	T	KOG1217	signal peptide, CUB domain and EGF like domain containing 3 [Source:RGD Symbol;Acc:1304880]	294297	F1LV96
ENSRNOG00000007319	22.247	2.44013	42.0539	17.2343	4.10721	0.00915084	0.237942	3	147813473	147819571	-	1935	Trib3	GO:0000122;GO:0003714;GO:0003714;GO:0004672;GO:0005524;GO:0005634;GO:0005654;GO:0006468;GO:0006469;GO:0006469;GO:0010827;GO:0019899;GO:0019901;GO:0019901;GO:0031625;GO:0032092;GO:0032869;GO:0034976;GO:0043405;GO:0045599;GO:0045717;GO:0045892;GO:0051443;GO:0055106;GO:0070059;	K19518	-	T;K	0UFUB;KOG0583;1B0GJ;0DET1;192BC;09TG4;1CPGU;0V4F6;13N9B	tribbles pseudokinase 3 [Source:RGD Symbol;Acc:708432]	246273	Q9WTQ6
ENSRNOG00000011448	459.901	323.609	596.193	1.84232	0.881526	0.00915189	0.237942	16	60307148	60327236	+	2870	Eri1	GO:0003676;GO:0005730;GO:0005737;GO:0008408;	K18416	EC:3.1.-.-	L;B	1B3S8;KOG0542;0VEV9;13IP2;0UNHY;18Y83;0A2XD;0DEVN;1D0T1	exoribonuclease 1 [Source:RGD Symbol;Acc:1308378]	361159	Q5FVR4
ENSRNOG00000010691	78.7499	48.7631	108.737	2.2299	1.15698	0.00916217	0.237942	19	830877	838099	-	1609	Cmtm3	GO:0001835;GO:0001835;GO:0005737;GO:0005737;GO:0005829;GO:0005829;GO:0016020;GO:0016020;GO:0016020;GO:0016021;GO:0016021;GO:0031410;GO:0031410;GO:0031965;GO:0031965;GO:0050861;GO:0050861;	-	-	V	1CZPX;KOG4788;192MZ;1B3G7;13RCV;0A2ZK;0VDUS;0USQ0;0DQM8	CKLF-like MARVEL transmembrane domain containing 3 [Source:RGD Symbol;Acc:1308763]	291813	B5DFL6
ENSRNOG00000013963	1826.19	1301.25	2351.12	1.80681	0.853447	0.00917586	0.237958	2	44289393	44314944	+	3112	Il6st	GO:0004896;GO:0004897;GO:0004915;GO:0004921;GO:0004923;GO:0004924;GO:0005127;GO:0005138;GO:0005515;GO:0005896;GO:0005900;GO:0005977;GO:0007165;GO:0008284;GO:0008284;GO:0008593;GO:0009897;GO:0016020;GO:0019221;GO:0019221;GO:0019838;GO:0019970;GO:0019981;GO:0030425;GO:0034097;GO:0038165;GO:0042102;GO:0042531;GO:0042802;GO:0043025;GO:0044297;GO:0045669;GO:0045747;GO:0045747;GO:0048711;GO:0048861;GO:…	K05060	-	T	13G5V;0DHIZ;09W9R;0UJRG;1CS96;18TTK;0IF1N;1AV8E;0V782	interleukin 6 signal transducer [Source:RGD Symbol;Acc:2903]	25205	H9BFG4
ENSRNOG00000014975	816.31	1100.06	532.558	0.484116	-1.04657	0.0092307	0.23904	5	76092287	76102590	+	2202	Zfp483	GO:0000978;GO:0000981;GO:0003677;GO:0005634;GO:0005634;GO:0006355;GO:0006355;GO:0006357;GO:0046872;	K09229	-	K	1CWA8;1AS8S;194YH;0V4DW;0DNJ2;0A3YW;0UQXM;KOG1721;12PGP	zinc finger protein 483 [Source:RGD Symbol;Acc:727958]	170955	Q99PJ8
ENSRNOG00000006776	7.10882	13.045	1.17263	0.0898908	-3.47568	0.00928089	0.239998	4	99074535	99125111	-	2146	Smyd1	GO:0003674;GO:0003714;GO:0003714;GO:0005515;GO:0005575;GO:0005634;GO:0005634;GO:0005634;GO:0005737;GO:0005737;GO:0006338;GO:0006338;GO:0007507;GO:0007507;GO:0008150;GO:0010831;GO:0010831;GO:0018024;GO:0018024;GO:0034968;GO:0034968;GO:0035914;GO:0035914;GO:0045663;GO:0045663;GO:0045892;GO:0045892;	K11426	-	B	0UHU2;0V88P;KOG2084;1ATE7;18UCX;1CX3P;0A0JT;0DJX8;13CUM	SET and MYND domain containing 1 [Source:RGD Symbol;Acc:1305105]	297333	D4A3D2
ENSRNOG00000059714	568.552	403.365	733.739	1.81904	0.86318	0.00931273	0.24048	6	135107271	135112775	-	2758	Hsp90aa1	GO:0005524;GO:0006457;GO:0051082;	K04079	-	-	-	heat shock protein 90 alpha family class A member 1 [Source:RGD Symbol;Acc:631409]	299331	P82995
ENSRNOG00000058276	66.987	35.8336	98.1403	2.73877	1.45353	0.00935401	0.241204	19	26416818	26417597	+	315	AABR07043200.1	-	-	-	-	-	-	-	-
ENSRNOG00000007060	965.2	181.231	1749.17	9.65159	3.27077	0.00947183	0.243896	5	104984414	105010857	-	1860	Plin2	GO:0003674;GO:0005634;GO:0005634;GO:0005737;GO:0005737;GO:0005811;GO:0005811;GO:0005811;GO:0005811;GO:0005811;GO:0005829;GO:0005829;GO:0005829;GO:0005886;GO:0005886;GO:0010890;GO:0014070;GO:0015909;GO:0015909;GO:0019915;GO:0019915;GO:0019915;GO:0042493;	K17284	-	U	1CWV7;0A0CC;0DMZ6;0VB8H;18SFU;0UHNB;13HK9;0IJG1;1AT8Z	perilipin 2 [Source:RGD Symbol;Acc:728889]	298199	Q5U2U5
ENSRNOG00000013720	848.181	584.252	1112.11	1.90348	0.928639	0.00949378	0.244116	14	86101277	86111306	+	3828	Aebp1	GO:0000122;GO:0000977;GO:0000977;GO:0001227;GO:0004180;GO:0004181;GO:0004181;GO:0005518;GO:0005576;GO:0006355;GO:0006508;GO:0006508;GO:0008270;GO:0008270;GO:1904026;	K21392	-	O;T;K;E;U	1B0HM;12P19;0UQQY;0DHEZ;09V9C;0V6KB;1CUB4;KOG2649;18ZXP	AE binding protein 1 [Source:RGD Symbol;Acc:1306922]	305494	A2RUV9
ENSRNOG00000055564	468.082	275.525	660.64	2.39775	1.26168	0.00961524	0.246382	3	82854777	82856171	-	1395	RGD1564664	-	-	-	-	-	similar to LOC387763 protein [Source:RGD Symbol;Acc:1564664]	499839	A8IHN8
ENSRNOG00000026676	9.46162	2.09604	16.8272	8.02811	3.00506	0.00962023	0.246382	5	153976535	153978847	+	1574	LOC500567	-	-	-	-	-	similar to RIKEN cDNA 1700029M20 [Source:RGD Symbol;Acc:1566032]	500567	Q5PQS8
ENSRNOG00000007575	161.933	213.449	110.416	0.517296	-0.950938	0.00962252	0.246382	5	67852180	68139199	-	1720	Plppr1	GO:0005654;GO:0006644;GO:0006644;GO:0007399;GO:0007399;GO:0008195;GO:0016020;GO:0016021;GO:0016311;GO:0042577;GO:0006644;GO:0006644;GO:0007399;GO:0007399;GO:0008195;GO:0016020;GO:0016021;GO:0016311;GO:0042577;	K19581	-	I	0E9CS;1BA7G;1DG84;0V3SB;0WIWT;0B673;13FUC;0ITB0	phospholipid phosphatase related 1 [Source:RGD Symbol;Acc:1303116]	298062	Q6WAY2
ENSRNOG00000006237	1929.89	2434.86	1424.91	0.585213	-0.772967	0.00964996	0.24654	13	51985684	51992693	-	2440	Gpr37l1	GO:0003085;GO:0004930;GO:0004930;GO:0004930;GO:0004930;GO:0005886;GO:0005886;GO:0005886;GO:0007165;GO:0007186;GO:0007186;GO:0007186;GO:0007193;GO:0008528;GO:0016020;GO:0016021;GO:0016021;GO:0016021;GO:0021940;GO:0036505;GO:0042277;GO:0043235;GO:0043410;GO:0043410;GO:0045665;GO:0045879;GO:0048712;GO:1903206;	K04244	-	W;T	KOG3656;0DIFE;1CT63;1903P;0UT1N;13ME3;1AZAY;0V82W;09X4C	G protein-coupled receptor 37-like 1 [Source:RGD Symbol;Acc:628835]	252939	B4F7C1
ENSRNOG00000000991	800.311	345.095	1255.53	3.63822	1.86323	0.00969844	0.24654	12	11252296	11265865	-	1516	Arpc1b	GO:0003779;GO:0005200;GO:0005200;GO:0005515;GO:0005634;GO:0005737;GO:0005856;GO:0005885;GO:0005885;GO:0005885;GO:0005885;GO:0005885;GO:0015629;GO:0015629;GO:0030833;GO:0030833;GO:0032355;GO:0034314;GO:0034314;GO:0034314;GO:0034314;GO:0034314;GO:0036284;GO:0043627;GO:0044877;GO:0051015;GO:0051015;GO:0051015;	K05757	-	Z	1CREG;0V6EZ;12PA7;1923K;0DGQK;0UPIE;09VFT;1B2HZ;KOG1523	actin related protein 2/3 complex, subunit 1B [Source:RGD Symbol;Acc:2155]	54227	O88656
ENSRNOG00000007044	107.167	153.05	61.2836	0.400416	-1.32043	0.00970541	0.24654	3	159321310	159347631	+	2525	L3mbtl1	GO:0005515;GO:0005634;GO:0006355;GO:0008270;GO:0005634;GO:0005634;GO:0006355;GO:0006355;	K24387	-	K;B	0URT3;1B1SX;1CS6C;18S20;0DJVM;0V49R;KOG3766;09YFC;12N50	L3MBTL histone methyl-lysine binding protein 1 [Source:RGD Symbol;Acc:1307316]	311613	-
ENSRNOG00000002167	18.2838	6.01654	30.551	5.07783	2.34421	0.00971353	0.24654	14	6889856	6900733	-	2724	Dmp1	GO:0001503;GO:0001503;GO:0005634;GO:0010811;GO:0030198;GO:0030198;GO:0030198;GO:0031012;GO:0050840;GO:0070173;	K23328	-	O;W	13N4M;KOG1181;1CVJX;0UPRP;09Z94;0DKRB;0VA6B;18T79;1AZE6	dentin matrix acidic phosphoprotein 1 [Source:RGD Symbol;Acc:2508]	25312	A2VD06
ENSRNOG00000060693	93.3648	147.113	39.6161	0.269289	-1.89277	0.00971449	0.24654	1	88131554	88162583	-	4117	Catsperg	GO:0036128;GO:0097228;	K16894	-	-	-	cation channel sperm associated auxiliary subunit gamma [Source:RGD Symbol;Acc:1310942]	292767	-
ENSRNOG00000006715	40.3817	12.6337	68.1297	5.39268	2.431	0.00973578	0.24654	8	132996649	133002201	-	1846	Ccr1	GO:0004435;GO:0004930;GO:0004930;GO:0004930;GO:0004950;GO:0004950;GO:0004950;GO:0005737;GO:0005886;GO:0005886;GO:0006816;GO:0006874;GO:0006887;GO:0006935;GO:0006935;GO:0006954;GO:0006954;GO:0006954;GO:0006954;GO:0006954;GO:0006955;GO:0006955;GO:0006955;GO:0006955;GO:0007165;GO:0007186;GO:0007186;GO:0007186;GO:0007204;GO:0007204;GO:0007267;GO:0009897;GO:0009897;GO:0009897;GO:0010629;GO:0016020;GO:…	K04176	-	T	KOG3656;1CRZB;0V6YN;0UJ3V;1AVN0;09T6C;13K12;0DH9A;191UI	C-C motif chemokine receptor 1 [Source:RGD Symbol;Acc:708446]	57301	Q9JLY8
ENSRNOG00000012103	16.9072	27.4644	6.35003	0.23121	-2.11273	0.00973626	0.24654	1	8933831	8944987	+	1266	Nmbr	GO:0004930;GO:0004930;GO:0004930;GO:0004946;GO:0004946;GO:0005886;GO:0007165;GO:0007186;GO:0007186;GO:0007186;GO:0008528;GO:0008528;GO:0016020;GO:0016021;GO:0016021;GO:0016021;GO:0031989;GO:0031989;GO:0004930;GO:0004930;GO:0004930;GO:0004930;GO:0004946;GO:0004946;GO:0005829;GO:0005886;GO:0005886;GO:0005887;GO:0007165;GO:0007186;GO:0007186;GO:0007186;GO:0007186;GO:0008528;GO:0008528;GO:0016020;GO:…	-	-	T	KOG3656	neuromedin B receptor [Source:RGD Symbol;Acc:3181]	-	-
ENSRNOG00000010999	798.415	1026.3	570.532	0.555913	-0.847068	0.00974859	0.24654	8	13871213	13909188	-	7679	Cep295	GO:0005737;GO:0005813;GO:0005813;GO:0005814;GO:0005829;GO:0005856;GO:0005886;GO:0007099;GO:0008017;GO:0010825;GO:1901985;GO:1903724;GO:1904951;GO:1990498;GO:0005813;GO:0005813;GO:0005737;GO:0005737;GO:0005813;GO:0005813;GO:0005813;GO:0005813;GO:0005813;GO:0005814;GO:0005814;GO:0005814;GO:0005815;GO:0005819;GO:0005829;GO:0005856;GO:0005856;GO:0007099;GO:0007099;GO:0008017;GO:0008017;GO:0008017;GO:…	-	-	Z;S	0DKB8;0IK6S;13IZX;1CV52;1AZP3;09YW0;0V9TV;192U3;0UP8D	centrosomal protein 295 [Source:RGD Symbol;Acc:1311723]	363018	-
ENSRNOG00000009792	62.4165	90.2138	34.6192	0.383746	-1.38178	0.00975056	0.24654	2	173453670	173563273	-	2794	Zbbx	GO:0008270;GO:0003341;GO:0008270;GO:0008270;GO:0031514;	-	-	S	0IVIG;0DJQC;0A479;1CZN9;13N79;0VF28	zinc finger, B-box domain containing [Source:RGD Symbol;Acc:1308632]	361964	Q4QR78
ENSRNOG00000006263	157.814	210.396	105.232	0.500161	-0.999536	0.00979299	0.24723	X	128897181	128925407	+	1207	Sh2d1a	GO:0005737;GO:0005737;GO:0006959;GO:0006968;GO:0007267;GO:0045954;GO:0050776;GO:0050860;	K07990	-	T;U	1D38E;193A3;0DTWA;0VHS9;0UV7A;1B5S5;KOG0565;0A6Y1;13UEX	SH2 domain containing 1A [Source:RGD Symbol;Acc:1562408]	501502	B2RZ59
ENSRNOG00000010797	56.3875	12.6896	100.085	7.8872	2.97951	0.00980501	0.24723	2	45104305	45113131	+	2173	Esm1	GO:0001525;GO:0002040;GO:0005171;GO:0005178;GO:0005520;GO:0005576;GO:0008284;GO:1902204;	K25036	-	W;T	13JHJ;0DNDK;0A0SG;KOG1218;0VBNR;1CTPQ;192PU;0URQM;1B2D6	endothelial cell-specific molecule 1 [Source:RGD Symbol;Acc:71013]	64536	P97682
ENSRNOG00000011936	159.877	213.364	106.39	0.49863	-1.00396	0.00991232	0.249372	8	115141539	115149527	-	1630	Abhd14a	GO:0005737;GO:0005737;GO:0005737;GO:0016020;GO:0016021;GO:0016787;GO:0005737;GO:0005737;GO:0005737;GO:0016020;GO:0016021;GO:0016787;	K13706	-	S	13PZC;0VEHX;0DREY;1912B;0IWCE;0UREK;1D0M1;0A3V2;1B510	abhydrolase domain containing 14A [Source:RGD Symbol;Acc:1309721]	300982	Q5I0C4
ENSRNOG00000046852	176.287	232.104	120.47	0.519033	-0.946103	0.00992543	0.249372	9	29984077	30068649	+	1996	B3gat2	GO:0000139;GO:0005794;GO:0006486;GO:0015018;GO:0015018;GO:0015018;GO:0015018;GO:0016020;GO:0016020;GO:0016020;GO:0016021;GO:0016740;GO:0046872;	-	-	O;G	1CQA3;0UGYM;KOG1476;18XPW;1AWSK;12N4H;0V59Z;0DFKE;09UAU	beta-1,3-glucuronyltransferase 2 [Source:RGD Symbol;Acc:620903]	-	-
ENSRNOG00000002057	14.8048	25.74	3.86956	0.150333	-2.73377	0.00995056	0.249372	14	7618022	7682377	+	1202	Slc10a6	GO:0005886;GO:0016020;GO:0043250;GO:0043251;GO:0005886;GO:0016020;GO:0043250;GO:0043251;	K14346	-	P	18Y6I;1ATY4;0V6AV;12RBV;KOG2718;0DGK2;09VBJ;0UIE7;1CR9X	solute carrier family 10 member 6 [Source:RGD Symbol;Acc:727800]	289459	Q70EX6
ENSRNOG00000046261	41.3479	19.8352	62.8607	3.16916	1.6641	0.00995571	0.249372	8	23142734	23148396	-	1549	Acp5	GO:0003993;GO:0016787;GO:0003993;GO:0003993;GO:0003993;GO:0003993;GO:0005764;GO:0008198;GO:0008199;GO:0016311;GO:0016787;GO:0016787;GO:0016787;GO:0032496;GO:0032691;GO:0032695;GO:0032720;GO:0032929;GO:0034097;GO:0045019;GO:0045453;GO:0046872;GO:0050728;GO:0050830;GO:0060349;	K14379	EC:3.1.3.2	O	18WGQ;1B2SR;KOG2679;0VCQA;0DPGS;0A1UK;0USUE;1CYF5;138I5	acid phosphatase 5, tartrate resistant [Source:RGD Symbol;Acc:2022]	25732	P29288
ENSRNOG00000000906	159.757	89.7878	229.726	2.55855	1.35533	0.00995877	0.249372	12	6711747	6740714	-	2221	Medag	GO:0005737;GO:0005737;GO:0045600;GO:0045600;	-	-	S	13KSS;0USCY;190YN;1ATHC;0DIZ4;0VC8X;1CXYQ;0IKGJ;0A1DB	mesenteric estrogen-dependent adipogenesis [Source:RGD Symbol;Acc:1307396]	-	-
ENSRNOG00000058317	722.124	1140.79	303.461	0.266011	-1.91044	0.00997586	0.249372	X	157150655	157154555	+	1619	Pnck	GO:0004672;GO:0004683;GO:0005524;GO:0006468;	K08795	EC:2.7.11.17	-	-	pregnancy up-regulated nonubiquitous CaM kinase [Source:RGD Symbol;Acc:69249]	29660	O70150
ENSRNOG00000011931	1824.38	2317.05	1331.72	0.574747	-0.799002	0.00998584	0.249372	1	244615821	244782706	+	5012	Smarca2	GO:0000166;GO:0000785;GO:0000976;GO:0003677;GO:0003682;GO:0003713;GO:0005515;GO:0005524;GO:0005524;GO:0005524;GO:0005575;GO:0005634;GO:0005634;GO:0005634;GO:0005634;GO:0005634;GO:0006338;GO:0006355;GO:0006355;GO:0007286;GO:0008094;GO:0008285;GO:0016514;GO:0016514;GO:0016514;GO:0016787;GO:0016887;GO:0016887;GO:0030308;GO:0035887;GO:0042393;GO:0042393;GO:0043044;GO:0045892;GO:0045893;GO:0045944;GO:…	K11647	EC:3.6.4.-	K;B	0V513;0UGB6;12NHG;1CQ1P;KOG0386;0DFBX;1AT1F;09U26;18YPR	SWI/SNF related, matrix associated, actin dependent regulator of chromatin, subfamily a, member 2 [Source:RGD Symbol;Acc:1302988]	361745	Q6DUH4
ENSRNOG00000047447	41.147	60.0953	22.1988	0.369393	-1.43677	0.0100093	0.249457	4	157374318	157374952	+	354	AC115420.2	-	-	-	-	-	-	-	-
ENSRNOG00000000457	136.277	86.1531	186.401	2.1636	1.11343	0.0100469	0.249457	20	3979035	3989669	+	4137	Tap1	GO:0000166;GO:0002250;GO:0002376;GO:0002479;GO:0002479;GO:0005524;GO:0005524;GO:0005524;GO:0005524;GO:0005783;GO:0006952;GO:0015433;GO:0015433;GO:0015433;GO:0015833;GO:0015833;GO:0015833;GO:0016020;GO:0016020;GO:0016020;GO:0016021;GO:0016021;GO:0016021;GO:0016021;GO:0016887;GO:0019885;GO:0023029;GO:0030176;GO:0030176;GO:0030176;GO:0034451;GO:0042287;GO:0042287;GO:0042288;GO:0042605;GO:0042626;GO:…	K05653	EC:7.4.2.14	Q;U	KOG0058;09UWX;0UKTV;0V5WR;18U06;1AVK0;1CU6J;12RBY;0DG6C	transporter 1, ATP binding cassette subfamily B member [Source:RGD Symbol;Acc:3817]	24811	P97561;P97949
ENSRNOG00000031312	465.569	241.541	689.598	2.855	1.51349	0.0100557	0.249457	4	157864969	157877633	+	2136	Tnfrsf1a	GO:0000139;GO:0000139;GO:0003176;GO:0003177;GO:0003332;GO:0005031;GO:0005031;GO:0005031;GO:0005515;GO:0005615;GO:0005794;GO:0005886;GO:0006693;GO:0006693;GO:0006915;GO:0006952;GO:0006954;GO:0006954;GO:0006954;GO:0007165;GO:0007165;GO:0007166;GO:0008630;GO:0009986;GO:0010614;GO:0016020;GO:0016021;GO:0019221;GO:0033209;GO:0033209;GO:0033209;GO:0042531;GO:0042742;GO:0043120;GO:0043123;GO:0043235;GO:…	K03158	-	T;V	0A4Q9;0IXBX;1AXB0;18Y8M;0URHP;0DS6I;0VFJC;1D1FM;13RJQ	TNF receptor superfamily member 1A [Source:RGD Symbol;Acc:621237]	25625	P22934
ENSRNOG00000017052	1015.97	1321.65	710.303	0.537438	-0.89583	0.0100656	0.249457	4	157511642	157517669	+	2978	Pianp	GO:0050776;GO:0050776;	-	-	S	1CV8T;0UPCA;09YZT;0V9XC;139JE;0DK50;0IVS4;1AVTZ;18WSS	PILR alpha associated neural protein [Source:RGD Symbol;Acc:1304952]	312711	Q5U2P6
ENSRNOG00000020679	292.346	80.7707	503.922	6.23891	2.64129	0.0100699	0.249457	8	22035256	22047059	+	2643	Icam1	GO:0002291;GO:0002693;GO:0005178;GO:0005615;GO:0007155;GO:0007159;GO:0016020;GO:0022614;GO:0044406;GO:0046813;GO:0050900;GO:0061028;GO:0070062;GO:0070374;GO:0098609;GO:1902042;GO:1904646;GO:2000352;	K06490	-	T;W	1B090;13NCQ;0IPHM;0DMAY;1CR6B;0UIWP;09W69;195US;0VAP3	intercellular adhesion molecule 1 [Source:RGD Symbol;Acc:2857]	25464	Q00238
ENSRNOG00000049943	18.9076	7.67927	30.1359	3.92432	1.97244	0.010074	0.249457	4	183401318	183426439	-	2928	Sinhcaf	GO:0008284;GO:0016580;GO:0016580;GO:0030336;GO:0030336;GO:0045596;GO:0008284;GO:0016580;GO:0016580;GO:0030336;GO:0030336;GO:0045596;	-	-	S	18SES;0UU7H;0A4K1;1D0IU;0VFF6;1B4AH;0IKPK;0DRD4;13HAE	SIN3-HDAC complex associated factor [Source:RGD Symbol;Acc:1595037]	686611	B4F781
ENSRNOG00000019048	4208.74	2550.57	5866.9	2.30023	1.20178	0.0100852	0.249457	1	47914759	47921587	-	2063	Sod2	GO:0000302;GO:0000303;GO:0000303;GO:0001306;GO:0001315;GO:0001836;GO:0001889;GO:0003032;GO:0003069;GO:0004784;GO:0004784;GO:0004784;GO:0005739;GO:0005739;GO:0005759;GO:0006357;GO:0006357;GO:0006749;GO:0006801;GO:0006801;GO:0006801;GO:0006979;GO:0007005;GO:0007507;GO:0007626;GO:0008217;GO:0008285;GO:0008630;GO:0008631;GO:0008637;GO:0009791;GO:0010332;GO:0014823;GO:0016491;GO:0019430;GO:0019430;GO:…	K04564	EC:1.15.1.1	P	0DMMM;1CWH5;0UTQD;KOG0876;0V45V;12R7H;1B44M;18Z5H;09ZJN	superoxide dismutase 2 [Source:RGD Symbol;Acc:3732]	24787	P07895
ENSRNOG00000021410	1213.4	1860.6	566.195	0.304308	-1.71639	0.0101298	0.250112	2	262914327	263650441	+	1721	Negr1	GO:0005886;GO:0007626;GO:0007631;GO:0010976;GO:0098609;	K06775	-	T	KOG3510	neuronal growth regulator 1 [Source:RGD Symbol;Acc:708416]	59318	Q9Z0J8
ENSRNOG00000047895	110.226	72.6361	147.817	2.03503	1.02505	0.0101533	0.250112	7	70328391	70333166	+	2083	Mettl1	GO:0000049;GO:0003723;GO:0005634;GO:0005634;GO:0005634;GO:0005654;GO:0005730;GO:0005829;GO:0006400;GO:0006400;GO:0006400;GO:0006400;GO:0008033;GO:0008168;GO:0008176;GO:0008176;GO:0008176;GO:0008176;GO:0008176;GO:0008176;GO:0008176;GO:0016740;GO:0030488;GO:0030488;GO:0032259;GO:0036265;GO:0043527;GO:0106004;	K03439	EC:2.1.1.33	J	12NAP;0DGRM;KOG3115;1CRFM;09VGW;1B3UV;0UIM4;0V6G5;191T5	methyltransferase like 1 [Source:RGD Symbol;Acc:1593036]	679091	M0R637
ENSRNOG00000020425	1216.11	1545.85	886.375	0.573388	-0.802416	0.0101645	0.250112	1	167373678	167533420	+	4479	Stim1	GO:0005246;GO:0005515;GO:0005783;GO:0030176;GO:0032237;GO:0051924;GO:0005246;GO:0005246;GO:0005515;GO:0005789;GO:0006811;GO:0006816;GO:0016020;GO:0016021;GO:0030176;GO:0030176;GO:0032237;GO:0032237;GO:0046872;GO:0051924;GO:0051924;GO:0005246;GO:0005246;GO:0016020;GO:0016021;GO:0030176;GO:0030176;GO:0032237;GO:0032237;GO:0046872;GO:0051924;GO:0051924;GO:0005246;GO:0005246;GO:0005515;GO:0005789;GO:…	K16059	-	W;U	1B0WX;12U3H;1CWQ6;0VB42;0DMUQ;0UR1R;0A080;KOG4403;18TJR	stromal interaction molecule 1 [Source:RGD Symbol;Acc:1306831]	361618	P84903
ENSRNOG00000033973	82.9612	118.442	47.4802	0.400872	-1.31878	0.0101814	0.250112	6	104406897	104409005	-	2109	Ccdc177	-	-	-	S	0UU65;0DQ8M;1CZUF;1AYH9;18U70;0A33N;0IKWT;0VDYM;12PSZ	coiled-coil domain containing 177 [Source:RGD Symbol;Acc:1561115]	500686	D4A8V2
ENSRNOG00000014987	35.1296	18.3604	51.8989	2.82668	1.49911	0.0101835	0.250112	9	15166118	15184468	+	1616	Mdfi	GO:0000122;GO:0005634;GO:0005634;GO:0007257;GO:0008134;GO:0008134;GO:0009950;GO:0030111;GO:0030178;GO:0042802;GO:0042802;GO:0043392;GO:0048704;GO:0048704;GO:0060707;GO:0060707;	-	-	T;K	1CRA3;1ATYB;0IYH9;1926F;0V6B1;0DGK8;09VBR;0UIEC;13PWH	MyoD family inhibitor [Source:RGD Symbol;Acc:1560271]	501097	B0BN88
ENSRNOG00000050539	93.2913	47.3552	139.227	2.94007	1.55585	0.0101993	0.250112	6	125644804	125723944	-	2483	Fbln5	GO:0000122;GO:0001558;GO:0005178;GO:0005178;GO:0005509;GO:0005509;GO:0005515;GO:0005576;GO:0005615;GO:0005615;GO:0005615;GO:0007155;GO:0008022;GO:0008022;GO:0016525;GO:0030198;GO:0033690;GO:0034394;GO:0042803;GO:0042803;GO:0042803;GO:0045944;GO:0046903;GO:0046903;GO:0048251;GO:0048251;GO:0048251;GO:0048251;GO:0048251;GO:0048251;GO:0062023;GO:0062023;GO:0062023;GO:0071953;GO:0098867;GO:2000121;GO:…	K17340	-	W;T	1DFIT;1BB4Y;13DWS;197A2;0B4ZH;0WHJ4;0E8M0;0IR76;0V3BK	fibulin 5 [Source:RGD Symbol;Acc:2594]	29158	Q9WVH8
ENSRNOG00000057153	320.22	103.308	537.132	5.19933	2.37832	0.0102111	0.250112	11	64882288	64919579	+	1728	Pla1a	GO:0002080;GO:0004806;GO:0006629;GO:0008970;GO:0052689;	K13618	EC:3.1.1.111	-	-	phospholipase A1 member A [Source:RGD Symbol;Acc:621261]	85311	P97535
ENSRNOG00000046834	404.962	229.967	579.956	2.52191	1.33451	0.0102215	0.250112	9	9721105	9747167	+	5188	C3	GO:0001798;GO:0001934;GO:0001970;GO:0002376;GO:0004866;GO:0004866;GO:0005515;GO:0005576;GO:0005576;GO:0005576;GO:0005576;GO:0005615;GO:0005615;GO:0005615;GO:0005615;GO:0006954;GO:0006954;GO:0006954;GO:0006956;GO:0006956;GO:0006956;GO:0006956;GO:0006957;GO:0006958;GO:0009617;GO:0009986;GO:0010575;GO:0010828;GO:0010866;GO:0010884;GO:0010951;GO:0016322;GO:0031715;GO:0032991;GO:0035846;GO:0045087;GO:…	K03990	-	O;V	1CWM0;1AZ7Z;0V9VN;0URWM;18WYI;13MNB;KOG1366;09YXX;0DKCZ	complement C3 [Source:RGD Symbol;Acc:2232]	24232	P01026;M0RBF1
ENSRNOG00000042771	61.5815	35.64	87.523	2.45575	1.29617	0.0103473	0.25285	7	118685022	118694015	+	1558	Apol3	GO:0005576;GO:0005576;GO:0006869;GO:0006869;GO:0008289;GO:0008289;GO:0008289;GO:0042157;GO:0042157;GO:0005576;GO:0005576;GO:0006869;GO:0006869;GO:0008289;GO:0008289;GO:0008289;GO:0042157;GO:0042157;	K14480	-	S;T	0UKBI;0VAS1;0IWES;1CSM0;1B64V;13Q1H;0DMDZ;09ZVH	apolipoprotein L, 3 [Source:RGD Symbol;Acc:1306480]	315108	Q5U1W1
ENSRNOG00000008639	3369.22	2482.09	4256.34	1.71482	0.778057	0.0103975	0.253736	7	75409581	75422268	-	2775	Pabpc1	GO:0003676;GO:0003723;GO:0005737;GO:0031047;GO:0045202;GO:0060213;GO:1900153;GO:0003676;GO:0003723;	K13126	-	A	1AS49;1CQFB;09WGD;0V6NG;0DFRT;KOG0123;0UQNJ;18SXX;12PB8	poly(A) binding protein, cytoplasmic 1 [Source:RGD Symbol;Acc:619838]	171350	Q9EPH8
ENSRNOG00000052357	114.812	61.3711	168.253	2.74157	1.455	0.0104159	0.253844	6	25598936	25616995	-	744	Fosl2	GO:0000977;GO:0001228;GO:0003677;GO:0003700;GO:0005654;GO:0006355;GO:0006357;GO:0045944;	-	-	-	-	FOS like 2, AP-1 transcription factor subunit [Source:RGD Symbol;Acc:2628]	-	-
ENSRNOG00000006368	1243.23	1575.02	911.433	0.57868	-0.789162	0.0104388	0.254063	6	61374328	61405195	-	3087	Lrrn3	GO:0005515;GO:0016020;GO:0016021;GO:0051965;	K24492	-	T	KOG0619;1AVDI;1CSHI;09WHS;0V7GC;13H9V;0DHT4;0UII7;191VE	leucine rich repeat neuronal 3 [Source:RGD Symbol;Acc:71066]	81514	Q9ESY6
ENSRNOG00000012480	206.137	269.429	142.844	0.530173	-0.915465	0.010484	0.254821	8	104724743	104790639	-	2828	Pxylp1	GO:0005794;GO:0006024;GO:0010909;GO:0016791;GO:0050650;	K21403	EC:3.1.3.-	S;O	1CX44;18UQE;12SY2;0DN7G;0A0K5;KOG3672;0VBGD;1AYQ3;0UN6D	2-phosphoxylose phosphatase 1 [Source:RGD Symbol;Acc:1359617]	315939	Q66H78
ENSRNOG00000050404	553.143	315.083	791.204	2.5111	1.32832	0.0105174	0.25518	3	171294856	171342646	-	1657	Pmepa1	GO:0000139;GO:0010008;GO:0010991;GO:0010991;GO:0030512;GO:0030512;GO:0031901;GO:0043231;GO:0050699;GO:0060394;GO:0070412;GO:0070412;	-	-	T	1AV1S;09X40;0IDYQ;0DRFJ;18ZYP;13HZM;0UKYC;1D0MT;0VEQB	prostate transmembrane protein, androgen induced 1 [Source:RGD Symbol;Acc:1308255]	311676	-
ENSRNOG00000026336	57.8698	80.9609	34.7786	0.429573	-1.21903	0.0105268	0.25518	16	81189073	81209429	+	1009	Tmem255b	GO:0016020;GO:0016021;GO:0016020;GO:0016021;GO:0016020;GO:0016021;	-	-	-	-	transmembrane protein 255B [Source:RGD Symbol;Acc:1566042]	290877	B5DFM9
ENSRNOG00000008696	105.467	68.351	142.582	2.08603	1.06076	0.0105651	0.255767	7	26472288	26478189	-	1189	RGD1563365	-	-	-	S;L	0VHIM;0UV7J;0DR4J;0J22I;1B574;0A76F;1D22G;193B4;13V04	similar to DNA segment, Chr 10, Wayne State University 102, expressed [Source:RGD Symbol;Acc:1563365]	299700	F1M6B3
ENSRNOG00000017401	92.7382	58.6036	126.873	2.16493	1.11432	0.0106278	0.256638	5	157423213	157501737	+	3387	Tmco4	GO:0016020;GO:0016021;GO:0016020;GO:0016021;	-	-	S;G;E	1CVET;KOG2385;09Z4K;0DI6Y;0UT66;0VA1U;18YXS;1B12F;12S6J	transmembrane and coiled-coil domains 4 [Source:RGD Symbol;Acc:1566357]	500573	Q499U8
ENSRNOG00000027276	193.276	262.838	123.714	0.470685	-1.08717	0.0106292	0.256638	5	15747614	16140896	-	1944	Xkr4	GO:0016021;	-	-	S	KOG4790;12RMB;0US7X;0V68X;09V9P;0DNVX;1CXTC	XK related 4 [Source:RGD Symbol;Acc:1549780]	297801	Q5GH59
ENSRNOG00000000805	4305.41	5471.61	3139.22	0.573729	-0.801558	0.0106435	0.256642	20	37876650	37889089	+	3127	Gja1	GO:0000132;GO:0000132;GO:0000139;GO:0001649;GO:0001649;GO:0001701;GO:0001701;GO:0001764;GO:0001764;GO:0001937;GO:0001947;GO:0001947;GO:0002070;GO:0002070;GO:0002088;GO:0002088;GO:0002544;GO:0002931;GO:0003104;GO:0003158;GO:0003294;GO:0003294;GO:0005102;GO:0005102;GO:0005243;GO:0005243;GO:0005243;GO:0005243;GO:0005243;GO:0005515;GO:0005515;GO:0005515;GO:0005515;GO:0005654;GO:0005737;GO:0005737;GO:…	K07372	-	T;W	1AYEC;0UNWZ;194Q4;13J4J;0IF97;09WA4;1CUUB;0V9HT;0DK0B	gap junction protein, alpha 1 [Source:RGD Symbol;Acc:2690]	24392	P08050;A0A654ICE6
ENSRNOG00000014900	367.038	205.509	528.566	2.57198	1.36288	0.010694	0.256768	17	57031766	57090888	+	4664	Crem	GO:0000122;GO:0000977;GO:0000978;GO:0000978;GO:0000981;GO:0001227;GO:0003677;GO:0003677;GO:0003677;GO:0003677;GO:0003677;GO:0003700;GO:0003700;GO:0005515;GO:0005634;GO:0005634;GO:0005634;GO:0005634;GO:0005634;GO:0005667;GO:0005667;GO:0005667;GO:0005737;GO:0006006;GO:0006355;GO:0006355;GO:0006355;GO:0006357;GO:0006631;GO:0006687;GO:0006687;GO:0007283;GO:0007283;GO:0007623;GO:0019933;GO:0032922;GO:…	K09052	-	K	12R42;0V8T7;0UMXC;1CU02;09XVM;1ASSH;KOG3584;192YH;0DJ85	cAMP responsive element modulator [Source:RGD Symbol;Acc:2402]	25620	Q03061;A0A0G2JYV9
ENSRNOG00000004726	840.99	594.403	1087.58	1.8297	0.871605	0.0107048	0.256768	13	47785161	47831110	-	2526	Mapkapk2	GO:0000166;GO:0002224;GO:0002224;GO:0002224;GO:0004672;GO:0004672;GO:0004674;GO:0004674;GO:0004674;GO:0004674;GO:0004683;GO:0005516;GO:0005524;GO:0005524;GO:0005524;GO:0005634;GO:0005634;GO:0005634;GO:0005634;GO:0005654;GO:0005737;GO:0005737;GO:0005737;GO:0005737;GO:0005813;GO:0006468;GO:0006468;GO:0006468;GO:0006468;GO:0006954;GO:0006954;GO:0006954;GO:0006974;GO:0006974;GO:0009931;GO:0016301;GO:…	K04443	EC:2.7.11.1	T	12PZ5;KOG0604;09YBC;0V7I5	MAPK activated protein kinase 2 [Source:RGD Symbol;Acc:631362]	289014	Q80ZF4
ENSRNOG00000019606	97.8842	61.8897	133.879	2.16318	1.11315	0.0107101	0.256768	10	59831241	59860987	+	3010	Trpv3	GO:0005216;GO:0005216;GO:0005216;GO:0005216;GO:0005216;GO:0005261;GO:0005261;GO:0005262;GO:0005515;GO:0005887;GO:0006811;GO:0006811;GO:0006811;GO:0009266;GO:0009266;GO:0009266;GO:0009266;GO:0009408;GO:0016020;GO:0016020;GO:0016020;GO:0016020;GO:0016020;GO:0016021;GO:0016021;GO:0016021;GO:0042636;GO:0042636;GO:0043235;GO:0043235;GO:0055085;GO:0055085;GO:0090280;GO:0098703;	K04972	-	P	0DJ5W;191IV;09XTU;12QQT;1B3V5;KOG3676;0UK6Y;1CTXT;0V8RE	transient receptor potential cation channel, subfamily V, member 3 [Source:RGD Symbol;Acc:1564531]	497948	E9PU00
ENSRNOG00000027309	80.0174	131.68	28.3546	0.21533	-2.21538	0.0107113	0.256768	17	2201924	2278613	-	2853	AABR07026805.1	GO:0016020;GO:0016021;GO:0016021;GO:0016021;	-	-	T	1CST1;0DI2H;12Q3Q;194U6;0UJCR;KOG3516;0V5DY;1B2FA;09VPX	-	-	-
ENSRNOG00000010951	471.634	328.131	615.138	1.87467	0.906636	0.0107192	0.256768	8	122789453	122807560	+	3254	Cmtm6	GO:0005886;GO:0005886;GO:0015031;GO:0015031;GO:0016020;GO:0016020;GO:0016020;GO:0016021;GO:0016021;GO:0031647;GO:0031647;GO:0031901;GO:0031901;GO:0032456;GO:0032456;GO:0043231;GO:0055038;GO:0055038;	-	-	V	KOG4788;0A4KB;13PQE;1B4NE;1D0MA;0DR62;0UUMS;0VFFI;192SN	CKLF-like MARVEL transmembrane domain containing 6 [Source:RGD Symbol;Acc:1307765]	316035	Q7TNZ9
ENSRNOG00000007284	3105.41	2280.08	3930.74	1.72395	0.785717	0.0107373	0.256864	5	138154673	138182897	+	2592	Slc2a1	GO:0001917;GO:0001939;GO:0005324;GO:0005355;GO:0005355;GO:0005737;GO:0005829;GO:0005886;GO:0005886;GO:0005887;GO:0007417;GO:0015911;GO:0016020;GO:0016020;GO:0016020;GO:0016021;GO:0016323;GO:0016323;GO:0016324;GO:0016324;GO:0022857;GO:0030496;GO:0030864;GO:0031982;GO:0033300;GO:0042149;GO:0042802;GO:0043621;GO:0045121;GO:0045202;GO:0055056;GO:0055056;GO:0055085;GO:0065003;GO:0070837;GO:0098708;GO:…	K07299	-	P;G	1D0S6;18SUM;0V4US;09TVJ;KOG0569;0UHRH;1AT3J;0DKR7;12P9V	solute carrier family 2 member 1 [Source:RGD Symbol;Acc:3704]	24778	P11167
ENSRNOG00000047800	65.3458	27.0177	103.674	3.83725	1.94007	0.0107618	0.256867	1	78186776	78195328	-	1950	C5ar1	GO:0001774;GO:0001856;GO:0002430;GO:0004875;GO:0004875;GO:0004875;GO:0004878;GO:0004878;GO:0004878;GO:0004878;GO:0004878;GO:0004930;GO:0004930;GO:0004930;GO:0004930;GO:0004930;GO:0004930;GO:0005886;GO:0005886;GO:0005886;GO:0006915;GO:0006935;GO:0006935;GO:0006935;GO:0006954;GO:0006954;GO:0007165;GO:0007186;GO:0007186;GO:0007186;GO:0007200;GO:0007204;GO:0007204;GO:0009986;GO:0010575;GO:0010759;GO:…	K04010	-	T;V	12Q2R;0IF0K;1AV8R;1CSRE;0V7PH;0DI0R;0UPIB;18W9V;09WR1	complement C5a receptor 1 [Source:RGD Symbol;Acc:70553]	113959	P97520
ENSRNOG00000015415	905.214	650.26	1160.17	1.78416	0.835244	0.0107657	0.256867	6	10533151	10568581	+	3859	Rhoq	GO:0003924;GO:0003924;GO:0005522;GO:0005525;GO:0005884;GO:0005886;GO:0007264;GO:0008286;GO:0008360;GO:0030866;GO:0030866;GO:0032427;GO:0032869;GO:0032869;GO:0045121;GO:0045944;GO:0046039;GO:0046326;GO:0051491;GO:1903077;GO:1903077;	K07194	-	Z	KOG0393	ras homolog family member Q [Source:RGD Symbol;Acc:621626]	85428	-
ENSRNOG00000018322	5195.62	3818.58	6572.65	1.72123	0.783438	0.0108215	0.257391	1	154377247	154458425	+	3703	Picalm	GO:0000149;GO:0005543;GO:0005543;GO:0005545;GO:0005545;GO:0005634;GO:0005769;GO:0005886;GO:0005905;GO:0005905;GO:0005905;GO:0006897;GO:0006897;GO:0006897;GO:0006898;GO:0006898;GO:0006898;GO:0006900;GO:0007409;GO:0007611;GO:0009986;GO:0010629;GO:0016020;GO:0016188;GO:0016197;GO:0030097;GO:0030100;GO:0030122;GO:0030132;GO:0030136;GO:0030136;GO:0030136;GO:0030276;GO:0030276;GO:0030276;GO:0030276;GO:…	K20044	-	F;T;U	12PM2;09V8V;1CR6Z;0DGH9;KOG0251;0V68A	phosphatidylinositol binding clathrin assembly protein [Source:RGD Symbol;Acc:621054]	89816	O55012
ENSRNOG00000026504	174.175	116.147	232.204	1.99922	0.999439	0.010826	0.257391	14	44943172	45002719	-	1704	Fam114a1	-	-	-	S	0DEYK;0V4YW;18U39;0IHQB;1AYV3;12R7T;09U02;0UP99;1CV5S	family with sequence similarity 114, member A1 [Source:RGD Symbol;Acc:1560201]	498366	-
ENSRNOG00000000123	716.358	440.011	992.705	2.25609	1.17383	0.0108301	0.257391	5	147246037	147270957	+	2395	Rnf19b	GO:0000151;GO:0000209;GO:0004842;GO:0004842;GO:0005737;GO:0005783;GO:0005783;GO:0005829;GO:0006511;GO:0016020;GO:0016021;GO:0016567;GO:0016567;GO:0016740;GO:0031624;GO:0032436;GO:0042267;GO:0042267;GO:0043130;GO:0043130;GO:0044194;GO:0044194;GO:0044194;GO:0046872;GO:0051865;GO:0051865;GO:0061630;GO:0061630;GO:0061630;GO:0000151;GO:0000209;GO:0004842;GO:0004842;GO:0005737;GO:0005783;GO:0006511;GO:…	K11973	EC:2.3.2.31	O	KOG1815	ring finger protein 19B [Source:RGD Symbol;Acc:1305470]	313806	D4A995
ENSRNOG00000006410	548.448	839.109	257.787	0.307215	-1.70268	0.0108708	0.25758	6	99356509	99361909	+	2700	Akap5	GO:0005516;GO:0005516;GO:0005516;GO:0005886;GO:0005886;GO:0008179;GO:0008179;GO:0016020;GO:0045762;GO:0045762;	K16522	-	T;U	1D29U;1AT4P;0IIWH;0VES3;0A495;0UJF6;12T9B;192P5;0DSYQ	A-kinase anchoring protein 5 [Source:RGD Symbol;Acc:620829]	171026	F1LPP6
ENSRNOG00000004854	48.6721	19.4166	77.9275	4.01344	2.00484	0.0108772	0.25758	7	96438046	96464049	-	4174	Has2	GO:0001570;GO:0005737;GO:0005887;GO:0005887;GO:0008284;GO:0030212;GO:0030213;GO:0030213;GO:0030213;GO:0030335;GO:0031410;GO:0036120;GO:0036302;GO:0044853;GO:0045226;GO:0050501;GO:0050501;GO:0050501;GO:0060349;GO:0071347;GO:0071356;GO:0071498;GO:0085029;GO:0090500;GO:1900625;	K00752	EC:2.4.1.212	M	KOG2571;12R3B	hyaluronan synthase 2 [Source:RGD Symbol;Acc:2781]	25694	O35776
ENSRNOG00000016220	1790.44	1314.46	2266.42	1.72423	0.78595	0.0108863	0.25758	3	12009578	12011666	+	586	Rpl12	GO:0003735;GO:0003735;GO:0005840;GO:0005840;GO:0005840;GO:0006412;GO:0006412;	K02870	-	J	KOG0886;13PRV;0V486;192Q5;09T96;0UFJD;1ARND;0DEKB;1CPA9	ribosomal protein L12 [Source:RGD Symbol;Acc:1565106]	499782	P23358;B2RYU2
ENSRNOG00000003880	12.3393	3.55783	21.1209	5.93644	2.5696	0.0108946	0.25758	7	58042281	58149061	-	2580	Tph2	GO:0004497;GO:0004510;GO:0004510;GO:0005506;GO:0009072;GO:0016714;GO:0042427;GO:0043005;GO:0055114;	K00502	EC:1.14.16.4	E	1CWMX;12SID;1AXU1;0V93G;KOG3820;194SS;09V2Z;0UMV7;0DMSC	tryptophan hydroxylase 2 [Source:RGD Symbol;Acc:631332]	317675	Q8CGU9
ENSRNOG00000042333	738.492	943.888	533.097	0.564789	-0.824216	0.0109167	0.257767	6	107596782	107625214	+	2857	Dnal1	GO:0005515;GO:0036158;GO:0043014;GO:0045504;	K10411	-	Z;T	0V9KN;0DK3E;0UJ41;09YNZ;1CXZY;KOG0531;1904J;1AUNN;12RBN	dynein, axonemal, light chain 1 [Source:RGD Symbol;Acc:1591349]	685664	A0A096MJZ0
ENSRNOG00000011826	1520.46	2174.26	866.663	0.398602	-1.32698	0.0109464	0.25812	16	22250470	22306662	+	5016	Lzts1	GO:0008017;GO:0016242;GO:0044772;	-	-	Z	09WFD;0UTW2;1CSF2;135F0;18ZB8;0DHQR;0V7DX;0IGJE;1ARN6	leucine zipper tumor suppressor 1 [Source:RGD Symbol;Acc:708565]	266711	Q8CFC9
ENSRNOG00000001201	767.646	557.087	978.205	1.75593	0.812235	0.01096	0.25812	20	10966331	10968432	-	640	Cstb	GO:0002020;GO:0002020;GO:0004866;GO:0004866;GO:0004866;GO:0004866;GO:0004869;GO:0004869;GO:0004869;GO:0004869;GO:0004869;GO:0004869;GO:0005515;GO:0005615;GO:0005615;GO:0005634;GO:0005634;GO:0005730;GO:0005737;GO:0005737;GO:0005737;GO:0005829;GO:0005829;GO:0008344;GO:0008344;GO:0010466;GO:0010466;GO:0010466;GO:0010951;GO:0030414;GO:0045861;GO:0045861;	K13907	-	S	0UVZ8;0DUXG;1D4AB;13V2Y;1B67I;193RP;0IZK7;0A8EK;0VJAN	cystatin B [Source:RGD Symbol;Acc:2435]	25308	P01041
ENSRNOG00000039447	10.5988	1.33161	19.866	14.9188	3.89906	0.0109791	0.258237	8	36815007	36817747	-	999	Pate4	GO:0001669;GO:0005615;GO:0009611;GO:0030548;GO:0050804;GO:0099601;	-	-	O	0DWX2;0AJZI;1B741;0VYGA;0KGVE;1D652;0UWZE;12W8R	prostate and testis expressed 4 [Source:RGD Symbol;Acc:1311172]	363041	D4AE27
ENSRNOG00000000485	256.614	178.399	334.829	1.87685	0.908313	0.0110375	0.259274	20	5609625	5618260	-	2026	Bak1	GO:0001776;GO:0001776;GO:0001782;GO:0001782;GO:0001783;GO:0001783;GO:0001836;GO:0001836;GO:0001836;GO:0001836;GO:0001974;GO:0001974;GO:0002262;GO:0002262;GO:0002352;GO:0002352;GO:0005515;GO:0005739;GO:0005739;GO:0005739;GO:0005739;GO:0005739;GO:0005741;GO:0005741;GO:0005741;GO:0005783;GO:0005783;GO:0005829;GO:0005829;GO:0006915;GO:0006915;GO:0006915;GO:0006915;GO:0006919;GO:0006919;GO:0007420;GO:…	K14021	-	T	0DKQM;0VA5T;1CVJ3;KOG4728;192XN;0UPEQ;1AZJS;13PN0;09Z8G	BCL2-antagonist/killer 1 [Source:RGD Symbol;Acc:621635]	116502	Q9JK59
ENSRNOG00000027944	815.649	1141.88	489.42	0.42861	-1.22226	0.0110903	0.260179	1	78893271	78895930	+	1826	Pnma8a	-	-	-	S	09WUY;0IKIG;0UJ04;13N10;1B074;195KM;1CSVB;0V7SW;0DI4X	PNMA family member 8A [Source:RGD Symbol;Acc:1310803]	361515	D3ZA53
ENSRNOG00000012216	205.113	136.128	274.099	2.01354	1.00973	0.0111198	0.260536	17	8400146	8429338	-	2670	Tgfbi	GO:0001525;GO:0001525;GO:0002062;GO:0003674;GO:0005178;GO:0005178;GO:0005515;GO:0005518;GO:0005518;GO:0005518;GO:0005518;GO:0005604;GO:0005615;GO:0005615;GO:0005615;GO:0005615;GO:0005802;GO:0005802;GO:0007155;GO:0007155;GO:0007155;GO:0007155;GO:0007155;GO:0007155;GO:0008283;GO:0008283;GO:0030198;GO:0030198;GO:0030198;GO:0031012;GO:0031012;GO:0031012;GO:0042802;GO:0042802;GO:0050839;GO:0050840;GO:…	K19519	-	W;M	0UGFZ;0V4XK;1AVY8;0DF8R;KOG1437;18ZRS;1CPYC;13I26;09TYN	transforming growth factor, beta induced [Source:RGD Symbol;Acc:620017]	116487	D4A8G5
ENSRNOG00000011562	274.537	369.16	179.914	0.48736	-1.03694	0.0111405	0.260685	X	151103576	151107016	+	2947	Slitrk2	GO:0005515;GO:0007409;GO:0007409;GO:0007409;GO:0007409;GO:0007409;GO:0016020;GO:0016021;GO:0016021;GO:0016021;GO:0050807;GO:0050807;GO:0051965;GO:0051965;GO:0098978;GO:0098978;GO:0098982;GO:0098982;GO:0099055;GO:0099560;GO:0099560;GO:1905606;GO:1905606;GO:1905606;GO:1905606;	-	-	T	12SPR;09UKE;0IGN5;1CQJG;1AZYP;0DFW5;0V5JT;191F4;0UR4Z	SLIT and NTRK-like family, member 2 [Source:RGD Symbol;Acc:1561361]	309349	D3ZK41
ENSRNOG00000005825	1032.13	744.838	1319.41	1.77141	0.824896	0.0111952	0.261628	7	60335969	60341264	-	1190	Lyz2	GO:0003796;GO:0003796;GO:0003796;GO:0003824;GO:0008152;GO:0016787;GO:0016798;GO:0019835;GO:0042742;GO:0042742;GO:0042742;	K13915	EC:3.2.1.17	O;G	193AF;13RV2;0UV0T;1D2XF;0DTP0;0VHHB;0IXGD;0A6PC;1B5J3	lysozyme 2 [Source:RGD Symbol;Acc:3026]	25211	Q6PDV1
ENSRNOG00000023991	42.448	23.7091	61.1869	2.58073	1.36778	0.0112291	0.261724	16	83358116	83382326	+	1478	Rab20	GO:0003924;GO:0003924;GO:0003924;GO:0005525;GO:0005525;GO:0005794;GO:0006886;GO:0012505;GO:0043231;GO:0045335;GO:0045335;GO:0045335;GO:0071346;GO:0071346;GO:0090383;GO:0090383;GO:0090385;GO:0090385;	K07911	-	U	KOG0092;1AX7E;13KBU;0A33U;1D1QP;18XG2;0UMR3;0VFVB;0DSF1	RAB20, member RAS oncogene family [Source:RGD Symbol;Acc:1593487]	689377	D4AAE6
ENSRNOG00000007350	118.793	62.3289	175.258	2.81182	1.4915	0.0112522	0.261724	7	119783849	119797098	-	1362	Rac2	GO:0003924;GO:0003924;GO:0003924;GO:0003924;GO:0003924;GO:0005525;GO:0005525;GO:0005525;GO:0005525;GO:0005525;GO:0005635;GO:0005635;GO:0005737;GO:0005737;GO:0005829;GO:0005829;GO:0005856;GO:0005884;GO:0005884;GO:0005886;GO:0005938;GO:0006935;GO:0006935;GO:0007015;GO:0007015;GO:0007015;GO:0007163;GO:0007186;GO:0007186;GO:0007264;GO:0007264;GO:0008045;GO:0008284;GO:0008284;GO:0008360;GO:0010592;GO:…	K07860	-	Z;S;T	0V62F;1CTM0;0DIVP;09V2T;18Z63;0UNQQ;1AY79;KOG0393;12N5X	Rac family small GTPase 2 [Source:RGD Symbol;Acc:1307568]	366957	Q5U1Y2
ENSRNOG00000051970	3.76452	0	7.52904	Inf	Inf	0.0112692	0.261724	7	141249044	141252578	+	1424	Aqp5	GO:0005783;GO:0005783;GO:0005886;GO:0005886;GO:0005887;GO:0005887;GO:0005902;GO:0005902;GO:0006833;GO:0006833;GO:0006833;GO:0006833;GO:0006833;GO:0009925;GO:0015250;GO:0015250;GO:0015250;GO:0015250;GO:0015267;GO:0015267;GO:0015670;GO:0015670;GO:0015670;GO:0015670;GO:0016020;GO:0016020;GO:0016020;GO:0016021;GO:0016021;GO:0016324;GO:0016324;GO:0030157;GO:0030157;GO:0030659;GO:0030659;GO:0030659;GO:…	K09867	-	-	-	aquaporin 5 [Source:RGD Symbol;Acc:2144]	25241	P47864
ENSRNOG00000010750	337.045	238.758	435.332	1.82331	0.866563	0.0112746	0.261724	6	52751106	52768574	+	3557	Twistnb	GO:0003674;GO:0003899;GO:0003899;GO:0005575;GO:0005634;GO:0005730;GO:0005736;GO:0008150;GO:0032774;GO:1990830;GO:1990830;	K03004	-	K	1CZPA;18VR0;KOG4134;1AUPE;0DNUY;0A2YR;0VAH0;13MP5;0UJ6J	TWIST neighbor [Source:RGD Symbol;Acc:1307824]	362728	D4ADH7
ENSRNOG00000020636	533.857	730.665	337.049	0.46129	-1.11625	0.0112887	0.261724	1	87199313	87221892	-	1470	Spint2	GO:0001843;GO:0001843;GO:0004867;GO:0004867;GO:0004867;GO:0004867;GO:0004867;GO:0005737;GO:0005737;GO:0005886;GO:0005886;GO:0006508;GO:0007163;GO:0007163;GO:0008233;GO:0010951;GO:0016020;GO:0016021;GO:0022408;GO:0022408;GO:0060672;GO:0060672;GO:0071711;GO:0071711;GO:0071773;GO:2000146;GO:2000146;GO:2000178;GO:0001843;GO:0004867;GO:0004867;GO:0004867;GO:0004867;GO:0005737;GO:0005886;GO:0005886;GO:…	K23421	-	O	09YIU;1CUT0;0V9GI;0DJZ4;1AYCP;13PVW;0UK96;KOG4295;18ZAJ	serine peptidase inhibitor, Kunitz type, 2 [Source:RGD Symbol;Acc:735123]	292770	G3V8S0;Q6P796
ENSRNOG00000016213	555.773	713.339	398.206	0.558228	-0.841072	0.0112917	0.261724	2	20431243	20702515	+	1501	Ssbp2	GO:0003697;GO:0005515;GO:0005737;	-	-	L	KOG4594;1CS27;0V71A;0DHC2;09W2Y;12R4S	single-stranded DNA binding protein 2 [Source:RGD Symbol;Acc:1562968]	361877	-
ENSRNOG00000017766	1416.85	2006.2	827.501	0.412472	-1.27763	0.0112999	0.261724	8	72405748	72460240	+	2582	Ca12	GO:0004089;GO:0004089;GO:0004089;GO:0004089;GO:0004089;GO:0004089;GO:0005886;GO:0006730;GO:0008270;GO:0008270;GO:0008270;GO:0016020;GO:0016021;GO:0016021;GO:0016021;GO:0016829;GO:0016836;GO:0046872;GO:0055064;GO:0055064;	K01672	EC:4.2.1.1	P	0A1V6;0UKWP;18Z10;13IIK;0VDK1;0DQEY;KOG0382;1B50Q;1CZGZ	carbonic anhydrase 12 [Source:RGD Symbol;Acc:1306612]	363085	A2IBE2
ENSRNOG00000030118	2240.87	671.425	3810.32	5.67497	2.50461	0.0113323	0.262092	X	65226748	65295810	+	5110	Msn	GO:0001771;GO:0001931;GO:0003725;GO:0003779;GO:0003779;GO:0005102;GO:0005737;GO:0005856;GO:0005856;GO:0005856;GO:0005886;GO:0005886;GO:0005902;GO:0005902;GO:0005925;GO:0007159;GO:0008092;GO:0008092;GO:0008360;GO:0008361;GO:0009986;GO:0010628;GO:0016020;GO:0016323;GO:0016324;GO:0016324;GO:0019899;GO:0019901;GO:0022612;GO:0022614;GO:0030175;GO:0031143;GO:0042098;GO:0042995;GO:0045177;GO:0045177;GO:…	K05763	-	-	-	moesin [Source:RGD Symbol;Acc:621260]	81521	O35763
ENSRNOG00000010490	16.0515	1.27956	30.8234	24.089	4.5903	0.0113448	0.262092	5	169338097	169339142	+	647	Hes2	GO:0003677;GO:0006355;GO:0046983;GO:1990837;	K09087	-	K	193MR;0DU9V;0UVFJ;1B5KV;13TVD;1D3MK;0A7GX;KOG4304;0VIBW	hes family bHLH transcription factor 2 [Source:RGD Symbol;Acc:62082]	29567	P35429
ENSRNOG00000020991	84.8673	41.1374	128.597	3.12604	1.64434	0.0113711	0.262092	1	227919301	227932603	-	2452	Ms4a6a	GO:0016021;	K22191	-	S	0UUPF;1D2N7;0DS71;0VGZN;193JN;1B37A;0A64Y;13W8M;0J2FM	membrane spanning 4-domains A6A [Source:RGD Symbol;Acc:1305800]	361735	F1LZT4
ENSRNOG00000049792	18.4789	31.0946	5.86313	0.188558	-2.40692	0.0113734	0.262092	16	37676962	38063821	-	1701	Glra3	GO:0004888;GO:0004888;GO:0005216;GO:0005216;GO:0005230;GO:0005230;GO:0005254;GO:0005886;GO:0005887;GO:0005887;GO:0005887;GO:0006811;GO:0006811;GO:0006811;GO:0006821;GO:0006821;GO:0006821;GO:0016020;GO:0016021;GO:0016021;GO:0016021;GO:0016594;GO:0016594;GO:0016934;GO:0016934;GO:0016934;GO:0016935;GO:0022824;GO:0022824;GO:0022852;GO:0030054;GO:0034220;GO:0034220;GO:0034707;GO:0042995;GO:0045202;GO:…	K05195	-	T	KOG3644	glycine receptor, alpha 3 [Source:RGD Symbol;Acc:621229]	114516	Q99JC9
ENSRNOG00000012284	130.916	175.039	86.7918	0.495842	-1.01205	0.0114108	0.262246	9	39539530	40008680	-	1953	Khdrbs2	GO:0003676;GO:0003723;GO:0008143;GO:0008266;GO:0017124;GO:0042169;GO:0048024;	K17843	-	A;K	12T8P;0DFQ5;1CQDS;0UK08;1AZHI;18WU4;KOG1588;0V5DP;09UEA	KH RNA binding domain containing, signal transduction associated 2 [Source:RGD Symbol;Acc:621738]	170843	Q920F3
ENSRNOG00000020193	70.8427	42.4696	99.2157	2.33615	1.22414	0.0114222	0.262246	9	18564927	18773092	+	5641	Runx2	GO:0000785;GO:0000976;GO:0000978;GO:0000987;GO:0001228;GO:0001501;GO:0001649;GO:0001649;GO:0001958;GO:0002051;GO:0002062;GO:0002063;GO:0002076;GO:0003677;GO:0003682;GO:0003700;GO:0003700;GO:0005524;GO:0005634;GO:0005634;GO:0005634;GO:0005654;GO:0005667;GO:0005737;GO:0006355;GO:0008284;GO:0010468;GO:0010628;GO:0019904;GO:0030217;GO:0030278;GO:0030509;GO:0032332;GO:0035115;GO:0040036;GO:0042475;GO:…	K09278	-	K	09TMW;0DEYC;1395F;KOG3982;0UH1H;1ARGY;0V4KY;1CQBV;18U5U	RUNX family transcription factor 2 [Source:RGD Symbol;Acc:2282]	367218	F1M9C5
ENSRNOG00000023376	1733.82	1274.97	2192.68	1.71979	0.782231	0.0114233	0.262246	18	3565166	3590739	+	3843	Riok3	GO:0000166;GO:0002376;GO:0003674;GO:0004674;GO:0004674;GO:0004674;GO:0004674;GO:0004674;GO:0004674;GO:0005524;GO:0005524;GO:0005524;GO:0005575;GO:0005829;GO:0006468;GO:0006468;GO:0008150;GO:0016301;GO:0016310;GO:0016740;GO:0030490;GO:0030490;GO:0030490;GO:0030688;GO:0030688;GO:0030688;GO:0031333;GO:0031333;GO:0032728;GO:0032728;GO:0039534;GO:0039534;GO:0042254;GO:0043124;GO:0043124;GO:0045087;GO:…	K08872	EC:2.7.11.1	T	KOG2269;133R2;0VDK4;0A2QC	RIO kinase 3 [Source:RGD Symbol;Acc:1310833]	361293	D3ZND9
ENSRNOG00000050000	4.56653	0	9.13306	Inf	Inf	0.0114388	0.262272	11	86092468	86092779	+	312	AABR07034739.1	GO:0003823;GO:0006910;GO:0006911;GO:0006958;GO:0009897;GO:0034987;GO:0042571;GO:0042742;GO:0045087;GO:0050853;GO:0050871;	-	-	S	0KEZ2;12ZXS;0E0BU;1D8IR;0UYJJ;0VV2A;0AHQF	Ig lambda-2 chain C region [Source:UniProtKB/Swiss-Prot;Acc:P20767]	-	-
ENSRNOG00000005433	50.3769	29.2124	71.5413	2.449	1.2922	0.011509	0.263181	4	133037014	133131953	-	2953	Shq1	GO:0000493;GO:0000493;GO:0000493;GO:0005654;GO:0005737;GO:0005737;GO:0022618;GO:0043065;GO:0051082;GO:2000233;GO:0000493;GO:0000493;GO:0000493;GO:0005654;GO:0005654;GO:0005737;GO:0005737;GO:0005737;GO:0005829;GO:0022618;GO:0022618;GO:0043065;GO:0043065;GO:0051082;GO:2000233;GO:2000233;	K14764	-	S;O	KOG3247;0V69Z;1ASPG;1CR8X;0UH09;18TK5;12TVB;09VAN;0DGJ2	SHQ1, H/ACA ribonucleoprotein assembly factor [Source:RGD Symbol;Acc:1310610]	297483	B4F784
ENSRNOG00000015078	596.116	201.221	991.011	4.92499	2.30012	0.0115189	0.263181	1	213810696	213811901	-	700	Ifitm3	GO:0016021;	K06566	-	S;T	13XNX;0VJSA;1D4IR;0A8GR;0UVYW;0DV1U;0J2DU;1B6FV	interferon induced transmembrane protein 3 [Source:RGD Symbol;Acc:1595844]	361673	P26376
ENSRNOG00000023935	1038.28	1451.34	625.221	0.430787	-1.21495	0.0115491	0.263181	3	147843077	147851768	-	1819	Nrsn2	GO:0007399;GO:0016020;GO:0016021;GO:0030133;GO:0030133;GO:0030133;GO:0030133;GO:0031410;GO:0043005;GO:0043025;GO:0043025;GO:0005886;GO:0007399;GO:0016020;GO:0016021;GO:0030133;GO:0030133;GO:0030133;GO:0030133;GO:0030133;GO:0031410;GO:0031410;GO:0043005;GO:0043025;GO:0043025;GO:0043025;	-	-	U	0A2DK;13KC3;1B3PY;1CZ1D;0UTB5;0VD96;0IHGJ;0DQ0U;193FI	neurensin 2 [Source:RGD Symbol;Acc:1586322]	689978	B0K009
ENSRNOG00000019136	406.646	291.298	521.995	1.79196	0.841541	0.0115617	0.263181	8	62341613	62368214	+	2330	Scamp2	GO:0005515;GO:0005515;GO:0005794;GO:0006886;GO:0006897;GO:0015031;GO:0015031;GO:0015031;GO:0015031;GO:0015031;GO:0016020;GO:0016021;GO:0016021;GO:0016021;GO:0016021;GO:0016021;GO:0030133;GO:0032588;GO:0032588;GO:0032588;GO:0043231;GO:0055038;GO:0055038;GO:0055038;	K19995	-	U	12N83;KOG3088;0DJ9V;0VAEU;09ZHP;0UMYU;1CU1U;18SCT;1B2X8	secretory carrier membrane protein 2 [Source:RGD Symbol;Acc:68348]	65168	Q5U2U4
ENSRNOG00000028021	195.297	134.528	256.067	1.90344	0.928612	0.0115641	0.263181	3	4341249	4341771	-	523	Rps13	GO:0003735;GO:0005840;GO:0006412;	K02953	-	J	KOG0400	ribosomal protein S13 [Source:RGD Symbol;Acc:621027]	684988	P62278
ENSRNOG00000021573	1611.7	2088.87	1134.53	0.543131	-0.880629	0.0116091	0.263181	1	92002927	92069160	-	7610	Dpy19l3	GO:0000030;GO:0005637;GO:0016020;GO:0016021;GO:0016021;GO:0016021;GO:0018406;	K24553	EC:2.4.1.-	U	0DPC5;0UKSK;1CY4B;0V9UM;09ZGJ;194J8;KOG4587;1AW8S;12TYQ	dpy-19 like C-mannosyltransferase 3 [Source:RGD Symbol;Acc:1308334]	308519	D4A9G5
ENSRNOG00000014227	6.03739	11.4119	0.662838	0.0580828	-4.10574	0.0116094	0.263181	1	103298174	103323476	-	1285	Mrgprx3	GO:0004930;GO:0004930;GO:0004930;GO:0004930;GO:0007165;GO:0007186;GO:0007186;GO:0007186;GO:0007186;GO:0007218;GO:0008188;GO:0016020;GO:0016021;GO:0016021;GO:0016021;	K08396	-	T	0UM4U;0VBA7;0DN0T;09XHS;194VG;141QE;0J9NM;1CWWY;1ASCV	MAS related GPR family member X3 [Source:RGD Symbol;Acc:632282]	252960	Q7TN49;A0A0H2UHL4
ENSRNOG00000009850	1034.7	669.076	1400.33	2.09293	1.06552	0.0116113	0.263181	8	36264750	36314811	-	2059	St3gal4	GO:0003836;GO:0003836;GO:0004513;GO:0006486;GO:0006486;GO:0006486;GO:0008118;GO:0008118;GO:0008373;GO:0009101;GO:0009247;GO:0009312;GO:0030194;GO:0030259;GO:0047288;GO:0050890;GO:0097503;GO:1903238;GO:1903238;GO:1990743;	K03494	EC:2.4.99.4	G	0URGU;0V5ST;1CQSC;09UT8;18TFA;12S5S;KOG2692;1AYFH;0DG2V	ST3 beta-galactoside alpha-2,3-sialyltransferase 4 [Source:RGD Symbol;Acc:1303068]	363040	P61131
ENSRNOG00000037931	63.8187	11.0382	116.599	10.5633	3.40098	0.0116367	0.263181	1	81328183	81344708	+	1025	Plaur	GO:0001934;GO:0005102;GO:0005886;GO:0009986;GO:0019899;GO:0019904;GO:0030162;GO:0030377;GO:0034112;GO:0038195;GO:0043066;GO:0043388;GO:0045742;GO:0090200;GO:2001243;GO:2001268;GO:0030162;GO:0030377;GO:0038195;	K03985	-	T	18SAP;0VDEG;0UTFT;1B369;13PEG;1CZ7C;0DFNR;0A2IM;0IJ50	plasminogen activator, urokinase receptor [Source:RGD Symbol;Acc:620597]	50692	P49616
ENSRNOG00000014405	556.994	404.762	709.227	1.75221	0.809172	0.0116526	0.263181	19	55387288	55389256	-	543	Aprt	GO:0002055;GO:0002055;GO:0002055;GO:0003999;GO:0003999;GO:0003999;GO:0003999;GO:0003999;GO:0003999;GO:0003999;GO:0005575;GO:0005654;GO:0005737;GO:0005737;GO:0005737;GO:0005737;GO:0005829;GO:0006166;GO:0006166;GO:0006166;GO:0006168;GO:0006168;GO:0006168;GO:0006168;GO:0006168;GO:0007595;GO:0007625;GO:0009116;GO:0009116;GO:0016208;GO:0016208;GO:0016208;GO:0016740;GO:0016757;GO:0032869;GO:0044209;GO:…	K00759	EC:2.4.2.7	F	0DS93;0VGKY;1AZGP;0US1D;1D2BW;KOG1712;13SYT;18TXE;0A09M	adenine phosphoribosyl transferase [Source:RGD Symbol;Acc:1307758]	292072	P36972
ENSRNOG00000017646	35.9003	53.3586	18.4421	0.345625	-1.53272	0.0116574	0.263181	19	54184946	54210515	-	336	RGD1309651	-	-	-	S	0UWFG;0J40B;0DVS6;1D52I;13WFV;0VKKG;0A9P0;1B6TM	similar to 1190005I06Rik protein [Source:RGD Symbol;Acc:1309651]	361424	D3ZSX5
ENSRNOG00000011250	243.99	40.9911	446.989	10.9045	3.44686	0.0116639	0.263181	4	85381889	85386231	-	1108	Inmt	GO:0004790;GO:0004790;GO:0004790;GO:0005829;GO:0005829;GO:0005829;GO:0008168;GO:0008168;GO:0008168;GO:0008170;GO:0009308;GO:0016740;GO:0030748;GO:0030748;GO:0032259;GO:0032259;	K00562	-	S;E	195T5;1CV0E;1B2K7;0DK6F;0IFTZ;09YS0;13VIK;0V9PT;0UFKF	indolethylamine N-methyltransferase [Source:RGD Symbol;Acc:1597087]	368066	D3ZNJ5
ENSRNOG00000033912	782.371	1032	532.746	0.516228	-0.95392	0.0116664	0.263181	16	20136008	20148867	-	3164	Fcho1	GO:0005654;GO:0005737;GO:0005829;GO:0005856;GO:0005886;GO:0005886;GO:0005886;GO:0005905;GO:0005905;GO:0005905;GO:0005905;GO:0030136;GO:0035612;GO:0035612;GO:0048268;GO:0048268;GO:0048268;GO:0072583;GO:0072583;GO:0072583;GO:0072583;GO:0072583;	K20042	-	D	KOG2398	FCH and mu domain containing endocytic adaptor 1 [Source:RGD Symbol;Acc:1307683]	290639	D3ZIM5
ENSRNOG00000002053	390.854	553.425	228.284	0.412492	-1.27756	0.0117164	0.263981	14	14439082	14689554	-	11571	Fras1	GO:0002009;GO:0002009;GO:0003338;GO:0003338;GO:0003674;GO:0005515;GO:0005575;GO:0005604;GO:0005604;GO:0007154;GO:0007154;GO:0008150;GO:0015031;GO:0015031;GO:0016020;GO:0016021;GO:0016021;GO:0016021;GO:0030326;GO:0030326;GO:0043588;GO:0043588;GO:0060021;GO:0060021;	K23379	-	O;W;T;P;V	KOG1306;KOG3525;KOG1216;KOG3597;KOG1025	Fraser extracellular matrix complex subunit 1 [Source:RGD Symbol;Acc:1306516]	289486	-
ENSRNOG00000000529	90.5746	38.6959	142.453	3.68135	1.88024	0.0117945	0.265304	20	8165307	8169555	+	1299	Pim1	GO:0004672;GO:0004674;GO:0004674;GO:0004674;GO:0005524;GO:0005524;GO:0005524;GO:0005634;GO:0005730;GO:0005737;GO:0005829;GO:0006468;GO:0006468;GO:0006468;GO:0008134;GO:0022898;GO:0030145;GO:0030145;GO:0043024;GO:0043066;GO:0043066;GO:0043433;GO:0045893;GO:0046777;GO:0050821;GO:0060045;GO:0070561;GO:0090336;GO:1902033;GO:1905062;GO:1990748;	K04702	EC:2.7.11.1	T;B	KOG0583;09THD;0UFXZ;1ATEZ;0DEU7;0V4GC;1958A;12UDI;1CPHY	Pim-1 proto-oncogene, serine/threonine kinase [Source:RGD Symbol;Acc:3330]	24649	P26794
ENSRNOG00000037765	376.411	264.754	488.069	1.84348	0.882433	0.0118124	0.265304	20	27954433	28002082	+	1725	Lims1	GO:0005737;GO:0005886;GO:0005911;GO:0005911;GO:0005925;GO:0005925;GO:0005925;GO:0007160;GO:0007163;GO:0008270;GO:0010628;GO:0010811;GO:0016020;GO:0019901;GO:0019904;GO:0030054;GO:0032991;GO:0033209;GO:0043009;GO:0043066;GO:0043547;GO:0044877;GO:0045184;GO:0045216;GO:0045216;GO:0045892;GO:0046872;GO:0048471;GO:0050680;GO:0051894;GO:0071560;GO:0098609;GO:0098609;GO:1900026;GO:1900026;GO:1901224;GO:…	K23354	-	T	1CQPI;12TMT;0DG02;1AU2Z;KOG2272;0V5PR;09UQ4;0UIMX	LIM zinc finger domain containing 1 [Source:RGD Symbol;Acc:1560732]	499443	C0KUC5
ENSRNOG00000020144	345.517	444.725	246.309	0.553847	-0.852442	0.0118213	0.265304	1	199687778	199716205	-	2553	RGD1310127	-	-	-	S;M	0UGHT;0DEN2;1CPBX;0V49V;18WVP;1AVXJ;KOG4249;09TAR;13H73	similar to cDNA sequence BC017158 [Source:RGD Symbol;Acc:1310127]	361654	Q499P8
ENSRNOG00000020182	565.189	284.635	845.743	2.97132	1.57111	0.0118413	0.265304	1	198420806	198450047	-	3674	Mvp	GO:0005634;GO:0005634;GO:0005737;GO:0005737;GO:0005829;GO:0005856;GO:0019901;GO:0019903;GO:0031953;GO:0038127;GO:0042059;GO:0042802;GO:0048471;GO:0061099;	K17266	-	Z	0DN21;1CWYE;0UIB6;1ATVH;0A0F8;18UVY;0VBBH;0IF6T;13JAZ	major vault protein [Source:RGD Symbol;Acc:70932]	64681	Q62667
ENSRNOG00000025110	303.228	476.866	129.589	0.271752	-1.87964	0.0118517	0.265304	1	190681094	190742444	+	4100	Vwa3a	-	K24509	-	S	0DNDU;0V73M;0A0SP;1AT9J;0UHP2;0IGU6;18T4A;13EZC;1CPZ2	von Willebrand factor A domain containing 3A [Source:RGD Symbol;Acc:1311670]	293449	A1A5Q7
ENSRNOG00000039315	105.993	69.3961	142.59	2.05472	1.03894	0.0118625	0.265304	3	11813575	11820549	-	1706	Cfap157	GO:0005737;GO:0005829;GO:0005856;GO:0005886;GO:0005929;GO:0005929;GO:0005929;GO:0007283;GO:0007288;GO:0007288;GO:0007288;GO:0007288;GO:0008017;GO:0008017;GO:0008017;GO:0008017;GO:0030154;GO:0036064;GO:0036064;GO:0036064;GO:0036064;GO:0042995;GO:0043231;	-	-	S	0UGQ9;13JI8;18WHY;0DFEJ;1B3DQ;1CQ4B;0V546;0IE36;09U52	cilia and flagella associated protein 157 [Source:RGD Symbol;Acc:1560002]	499781	Q4V7B0
ENSRNOG00000019496	117.032	69.5671	164.496	2.36457	1.24158	0.0118875	0.265537	10	88764732	88789057	+	3612	Stat5a	GO:0001938;GO:0003677;GO:0003677;GO:0003677;GO:0003700;GO:0003700;GO:0005634;GO:0005634;GO:0005654;GO:0005737;GO:0005829;GO:0006355;GO:0006355;GO:0007165;GO:0007165;GO:0038026;GO:0043536;GO:0060397;GO:0060397;	K11223	-	K	1B289;12PE2;KOG3667;194UJ;0UP21;09VPA;0V6N6;0DGXQ;1CRMY	signal transducer and activator of transcription 5A [Source:RGD Symbol;Acc:3773]	24918	Q62771
ENSRNOG00000050220	2774.57	3498.92	2050.23	0.585962	-0.77112	0.0119827	0.267227	6	13886740	15191660	-	6503	Nrxn1	GO:0005730;GO:0005886;GO:0016020;GO:0016021;GO:0046872;	-	-	T	KOG3514	neurexin 1 [Source:RGD Symbol;Acc:628659]	-	-
ENSRNOG00000048036	2340.87	1414.71	3267.03	2.30932	1.20747	0.0119926	0.267227	16	21050243	21076707	+	5201	Ncan	GO:0005509;GO:0005509;GO:0005540;GO:0005540;GO:0005540;GO:0005576;GO:0007155;GO:0007155;GO:0030246;GO:0005509;	K06794	-	T	0A1VG;0IJ1R;1B2S5;0UNK8;0DG4D;13I7Q;1927G;1CYG4;0VAGB	neurocan [Source:RGD Symbol;Acc:619941]	58982	G3V8R2
ENSRNOG00000024846	216.535	115.781	317.289	2.74043	1.4544	0.0120593	0.268386	3	9036373	9037942	-	1570	Ier5l	-	-	-	S	0VDIM;0UGY2;0DQA9;1B49A;18ZFQ;0A2NR;0J77W;1CZCB;13Z3R	immediate early response 5-like [Source:RGD Symbol;Acc:1561058]	499772	Q5PQP0
ENSRNOG00000012331	45.7633	24.0422	67.4844	2.80691	1.48898	0.0121176	0.269033	9	65614142	65662106	+	2027	Casp8	GO:0001525;GO:0001525;GO:0001817;GO:0001841;GO:0004175;GO:0004197;GO:0004197;GO:0004197;GO:0004197;GO:0005123;GO:0005164;GO:0005515;GO:0005515;GO:0005515;GO:0005634;GO:0005634;GO:0005654;GO:0005737;GO:0005737;GO:0005737;GO:0005829;GO:0005829;GO:0005886;GO:0006508;GO:0006508;GO:0006508;GO:0006508;GO:0006508;GO:0006915;GO:0006915;GO:0006915;GO:0006915;GO:0006915;GO:0006915;GO:0006919;GO:0006919;GO:…	K04398	EC:3.4.22.61	D	1AU0M;0DJ9B;0V8U3;1CU1B;09XWN;18USC;0UM29;KOG3573;12T3F	caspase 8 [Source:RGD Symbol;Acc:620945]	64044	Q9JHX4
ENSRNOG00000003359	4683.16	5909.18	3457.13	0.585045	-0.773381	0.012131	0.269033	X	71528988	71585908	+	5485	Ogt	GO:0005515;GO:0006493;GO:0016757;GO:0005515;GO:0006486;GO:0006493;GO:0006493;GO:0016740;GO:0016757;GO:0016757;GO:0016757;GO:0018215;GO:0031966;GO:0042995;GO:0048511;GO:0097363;GO:0120162;GO:0000123;GO:0005515;GO:0005547;GO:0005634;GO:0005654;GO:0005829;GO:0005886;GO:0006110;GO:0006111;GO:0006357;GO:0006486;GO:0006493;GO:0006493;GO:0006493;GO:0006493;GO:0006915;GO:0016262;GO:0016485;GO:0016740;GO:…	K09667	EC:2.4.1.255	O;T;P;G;B	12NUP;0V5MR;09UN5;0UFP1;KOG4626;KOG1124;1CQMF;0DFXY	O-linked N-acetylglucosamine (GlcNAc) transferase [Source:RGD Symbol;Acc:62060]	26295	P56558;G3V6F4
ENSRNOG00000016910	1097.95	1386.96	808.934	0.583243	-0.777832	0.0121565	0.269033	3	12178853	12415073	-	6430	Ralgps1	GO:0005085;GO:0005085;GO:0005085;GO:0005085;GO:0005085;GO:0007264;GO:0007264;GO:0032485;GO:0032485;GO:0050790;	K24023	-	T	0IQ6R;0B4GJ;0E8B6;1DF9U;1BB0N;13D3R;0V35V;1977I;0WGZR	Ral GEF with PH domain and SH3 binding motif 1 [Source:RGD Symbol;Acc:2319500]	100361774	-
ENSRNOG00000010107	276.154	195.585	356.723	1.82388	0.867011	0.0121601	0.269033	16	31734944	31946242	+	3009	AABR07025295.1	GO:0001725;GO:0005634;GO:0005829;GO:0005884;GO:0005886;GO:0005925;GO:0015629;GO:0016477;GO:0016477;GO:0030018;GO:0030027;GO:0030036;GO:0030036;	-	-	-	-	-	-	-
ENSRNOG00000020608	273.508	193.027	353.989	1.83388	0.874899	0.0121745	0.269033	8	21905865	21909842	+	1632	Ppan	GO:0000027;GO:0005634;GO:0005730;GO:0006364;GO:0019843;GO:0019843;GO:0030687;	K14859	-	J	0A0WT;1AZSS;0VBT7;KOG2963;0UP9R;12SFI;1CXFA;18ZUA;0DNHY	peter pan homolog [Source:RGD Symbol;Acc:1306325]	298699	Q5FVQ2
ENSRNOG00000001189	408.1	248.76	567.441	2.28108	1.18972	0.0121771	0.269033	20	10668411	10680283	-	4984	Sik1	GO:0000287;GO:0000287;GO:0004672;GO:0004674;GO:0004674;GO:0005524;GO:0005524;GO:0005634;GO:0005737;GO:0006468;GO:0006468;GO:0007346;GO:0008140;GO:0010830;GO:0010868;GO:0019901;GO:0032792;GO:0035556;GO:0035556;GO:0042826;GO:0043153;GO:0043276;GO:0045595;GO:0045721;GO:0055007;	K19008	EC:2.7.11.1	T;B	KOG0586;0DKMS;191W0;1CVG4;0UTU5;1AV3K;09Z5M;0V4ER;12NJJ	salt-inducible kinase 1 [Source:RGD Symbol;Acc:69407]	59329	Q9R1U5
ENSRNOG00000025415	30.3184	45.7799	14.8569	0.32453	-1.62358	0.0122056	0.269133	13	81988926	82006005	-	1868	Mettl11b	GO:0006480;GO:0008168;GO:0006480;GO:0008168;	K19579	EC:2.1.1.299	S;D	0DNXM;0VC5Q;1CXV1;KOG3178;1AWHI;13KXR;0UP4U;0A19Z;18VW7	methyltransferase like 11B [Source:RGD Symbol;Acc:1564106]	289167	-
ENSRNOG00000023799	203.332	141.262	265.402	1.87879	0.9098	0.0122162	0.269133	17	21580087	21591203	-	1546	Pak1ip1	GO:0005515;GO:0005730;GO:0005730;GO:0005730;GO:0008283;GO:0008283;GO:0042273;GO:0042273;GO:0060021;GO:0060021;GO:1901796;GO:1901796;	K14830	-	S;K;G;B	0VCJP;12X0Y;KOG0294;0UPZJ;19177;1CY9Y;0DPC4;0A1Q0;1AZEK	PAK1 interacting protein 1 [Source:RGD Symbol;Acc:1565353]	361232	Q32PZ0
ENSRNOG00000017833	269.144	349.065	189.224	0.542088	-0.883401	0.0122259	0.269133	17	66304501	66397653	-	2978	Actn2	GO:0003779;GO:0005509;GO:0005509;GO:0005515;GO:0005515;GO:0005515;GO:0005546;GO:0005546;GO:0005829;GO:0005886;GO:0005886;GO:0005925;GO:0005925;GO:0006936;GO:0006936;GO:0008092;GO:0008092;GO:0008092;GO:0019904;GO:0019904;GO:0030017;GO:0030017;GO:0030018;GO:0030018;GO:0030018;GO:0030035;GO:0030035;GO:0030175;GO:0030175;GO:0030274;GO:0030274;GO:0030374;GO:0030374;GO:0030864;GO:0031432;GO:0031432;GO:…	K21073	-	Z	1CTZS;0UKXS;0DKHE;KOG0035;12N2S;0V92N;09Z1X;1AXD0;195QM	actinin alpha 2 [Source:RGD Symbol;Acc:1308097]	291245	D3ZCV0
ENSRNOG00000015642	923.481	674.882	1172.08	1.73672	0.796362	0.0122548	0.269443	5	140979435	140994732	+	2611	Pabpc4	GO:0003676;GO:0003676;GO:0003723;GO:0003723;GO:0003723;GO:0003723;GO:0003729;GO:0003730;GO:0005634;GO:0005634;GO:0005737;GO:0005737;GO:0005829;GO:0008143;GO:0008143;GO:0008266;GO:0008266;GO:0010494;GO:0010494;GO:0043488;GO:0061515;GO:1990904;GO:1990904;	K13126	-	A	09WGD;0V6NG;0DFRT;1ASD9;KOG0123;1CSG4;12PB8;0UNDZ	poly(A) binding protein, cytoplasmic 4 [Source:RGD Symbol;Acc:1305015]	298510	G3V9N0
ENSRNOG00000007455	188.384	273.79	102.979	0.376125	-1.41072	0.0122758	0.269579	10	69737328	69794975	+	4467	Tmem132e	GO:0003674;GO:0005575;GO:0008150;GO:0016020;GO:0016021;GO:0035677;GO:0035677;GO:0044297;GO:0044297;GO:0003674;GO:0005575;GO:0008150;GO:0016020;GO:0016021;GO:0035677;GO:0044297;	K17599	-	S	KOG4789;12SAS;18T1Y;1AS7R;1CSR8;0DI0I;09WQT;0UP5J;0V7K0	transmembrane protein 132E [Source:RGD Symbol;Acc:1565522]	287564	D4A2A3
ENSRNOG00000021644	59.1182	25.4167	92.8198	3.65192	1.86865	0.0123426	0.27072	1	226897625	226912708	+	2251	Slc15a3	GO:0005765;GO:0006857;GO:0010008;GO:0015647;GO:0015835;GO:0016020;GO:0022857;GO:0043231;GO:0055085;GO:0070434;GO:0071916;GO:0140206;	K14638	-	P;E	0DJYU;1AZVC;09XYR;18YTV;12QTM;KOG1237;0V5WI;1CUSI;0UG9S	solute carrier family 15 member 3 [Source:RGD Symbol;Acc:628663]	246239	Q924V4
ENSRNOG00000034191	99.0669	139.811	58.3227	0.417154	-1.26135	0.012454	0.272834	13	80712882	80745347	-	2330	Fmo1	GO:0004497;GO:0004497;GO:0004497;GO:0004497;GO:0004497;GO:0004499;GO:0004499;GO:0004499;GO:0004499;GO:0004499;GO:0004499;GO:0005783;GO:0005789;GO:0006082;GO:0006082;GO:0006970;GO:0009404;GO:0009404;GO:0016020;GO:0016021;GO:0016491;GO:0017144;GO:0017144;GO:0032496;GO:0043231;GO:0043231;GO:0050660;GO:0050660;GO:0050661;GO:0050661;GO:0055114;GO:0070995;GO:0070995;GO:0004497;GO:0004497;GO:0004497;GO:…	K00485	EC:1.14.13.8	Q	09Y1K;12SFZ;1AXPG;KOG1399;1CWF5;0UKIT;0V6D1;18UD5;0DMJV	flavin containing dimethylaniline monoxygenase 1 [Source:RGD Symbol;Acc:2622]	25256	P36365
ENSRNOG00000047656	2626.1	3292.41	1959.79	0.595245	-0.748445	0.0125792	0.275246	10	108395860	108413059	+	3555	Gaa	GO:0002026;GO:0002086;GO:0002086;GO:0003007;GO:0003824;GO:0003824;GO:0004553;GO:0004553;GO:0004558;GO:0004558;GO:0005764;GO:0005764;GO:0005975;GO:0005975;GO:0005977;GO:0005980;GO:0005980;GO:0006941;GO:0007040;GO:0007040;GO:0007626;GO:0008152;GO:0009888;GO:0016020;GO:0016020;GO:0016021;GO:0016787;GO:0016798;GO:0030246;GO:0030246;GO:0043181;GO:0043231;GO:0046716;GO:0050884;GO:0050885;GO:0060048;	K12316	EC:3.2.1.20	G	12Q2U;1AXMB;0UN4K;09TH5;0DJEE;1CU6V;18S0F;KOG1065;0V4G5	glucosidase, alpha, acid [Source:RGD Symbol;Acc:735227]	367562	Q6P7A9
ENSRNOG00000024931	80.1728	50.487	109.859	2.17598	1.12166	0.012618	0.275764	1	222102437	222118459	-	5173	Ccdc88b	GO:0001819;GO:0001819;GO:0005737;GO:0005737;GO:0005813;GO:0008017;GO:0016020;GO:0016020;GO:0030705;GO:0030705;GO:0030705;GO:0031122;GO:0042102;GO:0042102;GO:0042832;GO:0042832;GO:0050870;GO:0050870;GO:0051959;	-	-	-	-	coiled-coil domain containing 88B [Source:RGD Symbol;Acc:1311475]	293698	D3ZTC4
ENSRNOG00000014845	29.8379	12.3586	47.3172	3.82869	1.93685	0.0126503	0.276095	3	113324698	113342675	-	5430	Strc	GO:0032426;GO:0050910;GO:0060088;GO:0060091;	K24636	-	S	1DENN;0V2RP;0IN9X;0B3EW;13BF6;0WFTY;0E7NE	stereocilin [Source:RGD Symbol;Acc:1593345]	691937	-
ENSRNOG00000005569	303.818	212.115	395.521	1.86466	0.89891	0.0126635	0.276095	10	83636518	83643859	+	1999	Phospho1	GO:0001958;GO:0001958;GO:0016311;GO:0016462;GO:0016462;GO:0016791;GO:0016791;GO:0016791;GO:0031012;GO:0031012;GO:0035630;GO:0035630;GO:0035630;GO:0046872;GO:0065010;GO:0065010;	K06124	EC:3.1.3.75	S;T	1CXPV;1AVMC;0UK52;0VC0V;KOG3120;0A14K;191Q3;0DNSJ;13SM2	phosphoethanolamine/phosphocholine phosphatase 1 [Source:RGD Symbol;Acc:1306182]	287644	G3V6P4
ENSRNOG00000025494	135.564	180.039	91.0885	0.505939	-0.982965	0.0126805	0.276134	14	43527579	43584343	-	2614	Nsun7	GO:0003723;GO:0008168;GO:0008168;GO:0008168;GO:0016740;GO:0030317;GO:0030382;GO:0032259;	-	-	S	0WJQ3;13GYG;0J0WJ	NOP2/Sun RNA methyltransferase family member 7 [Source:RGD Symbol;Acc:1310137]	305339	Q5XIM6
ENSRNOG00000055892	66.5825	40.6377	92.5272	2.27688	1.18706	0.0127165	0.276258	19	28041698	28044531	-	315	AABR07043395.1	-	-	-	-	-	-	-	-
ENSRNOG00000006995	629.536	397.954	861.118	2.16387	1.11361	0.0127165	0.276258	7	137142170	137335208	+	5877	Ano6	GO:0002407;GO:0002407;GO:0002407;GO:0002543;GO:0003674;GO:0005227;GO:0005229;GO:0005244;GO:0005247;GO:0005254;GO:0005575;GO:0005886;GO:0005886;GO:0005886;GO:0005887;GO:0006812;GO:0006821;GO:0007596;GO:0007596;GO:0007596;GO:0016020;GO:0016021;GO:0017121;GO:0017128;GO:0030501;GO:0030501;GO:0030501;GO:0032060;GO:0034707;GO:0034767;GO:0034767;GO:0034767;GO:0035590;GO:0035630;GO:0035725;GO:0042802;GO:…	K19500	-	U	KOG2514	anoctamin 6 [Source:RGD Symbol;Acc:1304765]	315272	F1M5Z5
ENSRNOG00000014296	110.338	172.151	48.5245	0.281872	-1.82689	0.0127927	0.277581	7	130768841	130827152	-	1892	Syt10	GO:0000149;GO:0001786;GO:0005509;GO:0005546;GO:0007268;GO:0007608;GO:0016020;GO:0016021;GO:0017158;GO:0017158;GO:0042802;GO:0042803;GO:0045956;GO:0046982;GO:0070382;	K19910	-	T;U	1BA6Q;0B0MB;14TU8;196V4;1DD0G;KOG1028;0V1E9;0E615;0WD4J	synaptotagmin 10 [Source:RGD Symbol;Acc:62041]	60567	O08625
[truncated: 17,366 more rows]
