# Supplementary material for: Knockdown of ATF3 suppresses the progression of ischemic stroke through inhibiting ferroptosis
Source: Frontiers journal article supplement (doi:10.3389/fnmol.2022.1079338), 2023-01-18
Supplement: Data_Sheet_3.ZIP [file Data_Sheet_3.ZIP]

## Sheet: Hspa1b
	Hspa1b		AVERAGE				AVERAGE	ΔCt	ΔΔCt	2^-ΔΔCt
C1	34.7389	34.9838	34.8614		27.7065	28.2932	27.9999	6.86148	0	1
C2	34.4458	35.0617	34.7538		28.1241	28.8437	28.4839	6.26987	-0.591616	1.50693
C3	35.3264	36.9476	36.137		29.8651	30.0321	29.9486	6.1884	-0.673089	1.59448
C4	34.7077	35.2151	34.9614		29.1189	29.2246	29.1718	5.78961	-1.07188	2.10217
C5	35.7329	35.4678	35.6004		28.878	29.6004	29.2392	6.36115	-0.500336	1.41454
C6	35.8917	34.5198	35.2057		28.0517	28.9087	28.4802	6.72554	-0.135942	1.09881
M1	34.9977	35.4781	35.2379		30.9075	29.7545	30.331	4.90693	-1.95455	3.87595
M2	35.1884	34.8256	35.007		28.3397	29.819	29.0794	5.92762	-0.933864	1.91039
M3	35.835	34.4631	35.149		29.8928	28.9573	29.425	5.72404	-1.13744	2.19991
M4	34.1546	34.8214	34.488		29.6262	29.1666	29.3964	5.0916	-1.76989	3.41027
M5	34.1515	34.0437	34.0976		29.7274	28.9194	29.3234	4.77413	-2.08735	4.24968
M6	33.5369	34.3882	33.9625		28.5638	28.7114	28.6376	5.32497	-1.53651	2.90092

## Sheet: Lif
	Lif		AVERAGE				AVERAGE	ΔCt	ΔΔCt	2^-ΔΔCt
C1	31.0507	32.3924	31.7216		27.7065	28.2932	27.9999	3.72168	0	1
C2	31.9407	31.9593	31.95		28.1241	28.8437	28.4839	3.46606	-0.255621	1.19385
C3	32.9073	32.9852	32.9463		29.8651	30.0321	29.9486	2.99767	-0.724016	1.65177
C4	31.1855	31.9655	31.5755		29.1189	29.2246	29.1718	2.40375	-1.31793	2.49308
C5	31.6132	31.7406	31.6769		28.878	29.6004	29.2392	2.43762	-1.28406	2.43523
C6	30.5089	31.526	31.0174		28.0517	28.9087	28.4802	2.53726	-1.18442	2.27272
M1	31.5643	31.9706	31.7675		30.9075	29.7545	30.331	1.43648	-2.2852	4.87432
M2	31.9314	31.0004	31.4659		28.3397	29.819	29.0794	2.38651	-1.33518	2.52306
M3	31.4114	30.7566	31.084		29.8928	28.9573	29.425	1.659	-2.06269	4.17763
M4	30.1994	31.7506	30.975		29.6262	29.1666	29.3964	1.5786	-2.14308	4.41705
M5	30.7314	32.2567	31.4941		29.7274	28.9194	29.3234	2.17065	-1.55103	2.93027
M6	31.826	31.6796	31.7528		28.5638	28.7114	28.6376	3.11523	-0.606451	1.52251

## Sheet: Tfpi2
	Tfpi2		AVERAGE				AVERAGE	ΔCt	ΔΔCt	2^-ΔΔCt
C1	33.5109	34.4836	33.9972		27.7065	28.2932	27.9999	5.99736	0	1
C2	35.2663	35.7417	35.504		28.1241	28.8437	28.4839	7.02008	1.02272	0.492187
C3	35.0422	35.9802	35.5112		29.8651	30.0321	29.9486	5.56261	-0.434751	1.35168
C4	33.8605	34.0365	33.9485		29.1189	29.2246	29.1718	4.77672	-1.22063	2.33049
C5	34.604	33.8457	34.2249		28.878	29.6004	29.2392	4.98561	-1.01174	2.01634
C6	34.6803	34.6049	34.6426		28.0517	28.9087	28.4802	6.16244	0.165083	0.891877
M1	33.7933	34.4555	34.1244		30.9075	29.7545	30.331	3.79341	-2.20395	4.60738
M2	32.429	32.892	32.6605		28.3397	29.819	29.0794	3.58112	-2.41623	5.33776
M3	33.2061	33.5422	33.3742		29.8928	28.9573	29.425	3.94916	-2.04819	4.13588
M4	33.873	34.6242	34.2486		29.6262	29.1666	29.3964	4.85224	-1.14511	2.21163
M5	34.8583	33.8428	34.3506		29.7274	28.9194	29.3234	5.02716	-0.970199	1.95911
M6	34.2949	33.4835	33.8892		28.5638	28.7114	28.6376	5.25165	-0.745706	1.67679

## Sheet: Ptx3
	Ptx3		AVERAGE				AVERAGE	ΔCt	ΔΔCt	2^-ΔΔCt
C1	33.3453	32.9603	33.1528		27.7065	28.2932	27.9999	5.15292	0	1
C2	33.1312	31.6267	32.379		28.1241	28.8437	28.4839	3.89505	-1.25787	2.39142
C3	34.5927	33.9009	34.2468		29.8651	30.0321	29.9486	4.29824	-0.854678	1.80836
C4	33.7768	33.2668	33.5218		29.1189	29.2246	29.1718	4.35007	-0.802846	1.74454
C5	33.6333	33.1517	33.3925		28.878	29.6004	29.2392	4.15326	-0.999658	1.99953
C6	33.6346	33.2555	33.445		28.0517	28.9087	28.4802	4.96484	-0.188077	1.13924
M1	33.17	32.6396	32.9048		30.9075	29.7545	30.331	2.57381	-2.57911	5.97569
M2	32.4981	33.108	32.803		28.3397	29.819	29.0794	3.72368	-1.42923	2.69303
M3	32.2543	32.4986	32.3764		29.8928	28.9573	29.425	2.95142	-2.20149	4.59955
M4	32.0036	33.3579	32.6808		29.6262	29.1666	29.3964	3.28438	-1.86854	3.65163
M5	32.0436	33.3079	32.6758		29.7274	28.9194	29.3234	3.35234	-1.80058	3.4836
M6	31.858	33.2523	32.5552		28.5638	28.7114	28.6376	3.91763	-1.23528	2.35427

## Sheet: Atf3
	Atf3		AVERAGE				AVERAGE	ΔCt	ΔΔCt	2^-ΔΔCt
C1	33.6996	34.4944	34.097		27.7065	28.2932	27.9999	6.09714	0	1
C2	33.7812	34.3379	34.0595		28.1241	28.8437	28.4839	5.57561	-0.521531	1.43548
C3	34.886	34.0686	34.4773		29.8651	30.0321	29.9486	4.52869	-1.56845	2.96585
C4	33.858	33.2523	33.5552		29.1189	29.2246	29.1718	4.38343	-1.71371	3.28002
C5	34.6953	34.4703	34.5828		28.878	29.6004	29.2392	5.34355	-0.753583	1.68597
C6	34.7253	33.1703	33.9478		28.0517	28.9087	28.4802	5.46762	-0.629514	1.54704
M1	33.6583	34.1841	33.9212		30.9075	29.7545	30.331	3.59024	-2.5069	5.68397
M2	34.1425	33.8621	34.0023		28.3397	29.819	29.0794	4.92297	-1.17416	2.25662
M3	34.67	33.6533	34.1616		29.8928	28.9573	29.425	4.73664	-1.3605	2.56774
M4	33.7335	33.1546	33.4441		29.6262	29.1666	29.3964	4.04767	-2.04947	4.13952
M5	33.5385	33.1696	33.3541		29.7274	28.9194	29.3234	4.03063	-2.0665	4.1887
M6	33.698	33.3033	33.5007		28.5638	28.7114	28.6376	4.86313	-1.23401	2.3522

## Sheet: Smyd1
	Smyd1		AVERAGE				AVERAGE	ΔCt	ΔΔCt	2^-ΔΔCt
C1	33.5219	34.1277	33.8248		27.7065	28.2932	27.9999	5.82494	0	1
C2	33.4126	34.1226	33.7676		28.1241	28.8437	28.4839	5.28367	-0.541262	1.45524
C3	34.6476	34.8608	34.7542		29.8651	30.0321	29.9486	4.80561	-1.01932	2.02697
C4	33.5125	34.698	34.1053		29.1189	29.2246	29.1718	4.93351	-0.891423	1.85501
C5	34.4739	34.4053	34.4396		28.878	29.6004	29.2392	5.20039	-0.624551	1.54173
C6	34.3367	34.9877	34.6622		28.0517	28.9087	28.4802	6.18202	0.357089	0.780739
M1	35.7433	34.9985	35.3709		30.9075	29.7545	30.331	5.03992	-0.785012	1.72311
M2	34.8514	35.9279	35.3897		28.3397	29.819	29.0794	6.31031	0.48537	0.714314
M3	35.9784	34.523	35.2507		29.8928	28.9573	29.425	5.8257	0.000761986	0.999472
M4	35.5376	35.5585	35.548		29.6262	29.1666	29.3964	6.15165	0.326714	0.79735
M5	35.9793	35.4554	35.7174		29.7274	28.9194	29.3234	6.39395	0.569016	0.674076
M6	34.8285	35.6777	35.2531		28.5638	28.7114	28.6376	6.61555	0.790619	0.578096

## Sheet: Tacr2 
	Tacr2		AVERAGE				AVERAGE	ΔCt	ΔΔCt	2^-ΔΔCt
C1	34.1217	33.5255	33.8236		27.7065	28.2932	27.9999	5.82374	0	1
C2	34.3739	33.0561	33.715		28.1241	28.8437	28.4839	5.23111	-0.592627	1.50799
C3	34.1052	34.2807	34.1929		29.8651	30.0321	29.9486	4.24435	-1.57939	2.98844
C4	34.027	34.1777	34.1024		29.1189	29.2246	29.1718	4.9306	-0.893137	1.85721
C5	34.2494	33.8296	34.0395		28.878	29.6004	29.2392	4.80025	-1.02349	2.03283
C6	34.3098	33.2296	33.7697		28.0517	28.9087	28.4802	5.2895	-0.534244	1.44818
M1	35.7717	34.8553	35.3135		30.9075	29.7545	30.331	4.9825	-0.841241	1.79159
M2	35.8715	35.0418	35.4566		28.3397	29.819	29.0794	6.37728	0.55354	0.681346
M3	36.7796	35.9082	36.3439		29.8928	28.9573	29.425	6.91891	1.09517	0.468081
M4	35.3033	35.0445	35.1739		29.6262	29.1666	29.3964	5.77755	-0.046197	1.03254
M5	35.0971	35.0295	35.0633		29.7274	28.9194	29.3234	5.73986	-0.0838792	1.05986
M6	35.456	35.2132	35.3346		28.5638	28.7114	28.6376	6.69706	0.873315	0.545891
