# Supplementary material for: Knockdown of ATF3 suppresses the progression of ischemic stroke through inhibiting ferroptosis
Source: Frontiers journal article supplement (doi:10.3389/fnmol.2022.1079338), 2023-01-18
Supplement: Data_Sheet_4.ZIP [file Data_Sheet_4.ZIP]

## Sheet: ATF3
	ATF3		AVERAGE	SD	GAPDH		AVERAGE	SD	ΔCt	ΔΔCt	2^-ΔΔCt
1	33.364	33.1765	33.2702	0.132572	28.1597	28.5251	28.3424	0.258356	4.92785	0	1	Control
2	33.3065	33.4179	33.3622	0.0787775	28.5619	28.53	28.5459	0.0226072	4.81627	-0.111584	1.08041
3	33.4985	33.5057	33.5021	0.00505546	28.1266	28.2958	28.2112	0.119654	5.29088	0.363033	0.777528
4	34.0762	33.7333	33.9047	0.242431	28.8495	28.5251	28.6873	0.22937	5.21748	0.289628	0.818113
5	33.366	33.7236	33.5448	0.252803	28.5044	28.8665	28.6854	0.256014	4.85935	-0.0684988	1.04862
6	33.1528	33.1979	33.1754	0.0319421	28.3637	28.2958	28.3298	0.0479944	4.8456	-0.0822531	1.05867
7	31.8025	31.9732	31.8879	0.120659	28.5661	28.6475	28.6068	0.0575534	3.2811	-1.64676	3.13129	Model
8	31.9103	32.3099	32.1101	0.282566	29.0527	29.1633	29.108	0.0781759	3.00206	-1.92579	3.79946
9	31.435	31.6658	31.5504	0.163195	28.3972	28.2958	28.3465	0.0716597	3.20387	-1.72398	3.30346
10	31.4361	31.7383	31.5872	0.213755	28.9179	28.6351	28.7765	0.199985	2.81072	-2.11713	4.3383
11	31.4297	31.8462	31.6379	0.294515	28.418	28.6266	28.5223	0.147495	3.11562	-1.81223	3.51184
12	31.6126	31.4002	31.5064	0.150174	28.2045	28.5433	28.3739	0.23953	3.1325	-1.79535	3.47099
13	32.1084	31.9808	32.0446	0.0902684	28.9547	28.6351	28.7949	0.225997	3.24975	-1.67811	3.20007	AAV-siNC
14	31.2959	31.5472	31.4216	0.17767	28.8371	28.6266	28.7319	0.148833	2.68972	-2.23813	4.71786
15	31.8309	31.7666	31.7987	0.0454539	28.6378	28.4534	28.5456	0.130384	3.25313	-1.67472	3.19258
16	32.2966	32.1439	32.2203	0.10798	28.318	28.6351	28.4765	0.224194	3.74373	-1.18412	2.27225
17	31.9182	31.4126	31.6654	0.357527	28.8828	28.6266	28.7547	0.181132	2.91074	-2.01711	4.04773
18	32.4859	32.821	32.6534	0.236978	29.1811	29.0534	29.1173	0.0903159	3.53614	-1.39171	2.62389
19	32.9651	32.6913	32.8282	0.193564	28.3598	28.6351	28.4975	0.194617	4.33076	-0.597086	1.51266	AAV-siATF3-1
20	32.6733	32.8299	32.7516	0.110795	28.7237	28.6266	28.6752	0.0686609	4.07643	-0.851421	1.80428
21	33.4822	33.2312	33.3567	0.1775	28.482	29.8433	29.1627	0.962552	4.19406	-0.733795	1.66301
22	33.3301	33.6206	33.4754	0.205453	28.9619	28.6351	28.7985	0.23111	4.67686	-0.250988	1.19002
23	32.9478	33.0736	33.0107	0.0888976	28.2715	28.6266	28.449	0.251128	4.56165	-0.366199	1.28895
24	33.2529	33.1981	33.2255	0.0387934	28.5413	29.4534	28.9974	0.644961	4.22814	-0.699713	1.62418
25	32.5464	32.6336	32.59	0.0616841	28.2981	28.6351	28.4666	0.23828	4.12342	-0.80443	1.74646	AAV-siATF3-2
26	32.6785	32.5657	32.6221	0.0797621	28.3195	28.1165	28.218	0.143601	4.40409	-0.523757	1.43769
27	33.2474	33.5061	33.3768	0.182982	28.8204	29.0972	28.9588	0.19576	4.41793	-0.509917	1.42397
28	32.4392	32.8296	32.6344	0.276049	28.3741	28.4426	28.4084	0.0484615	4.22603	-0.701822	1.62656
29	32.8686	32.7619	32.8152	0.0754349	28.7446	28.5908	28.6677	0.108787	4.14754	-0.780307	1.7175
30	33.4823	33.1983	33.3403	0.20086	28.4369	28.9493	28.6931	0.36229	4.64723	-0.280624	1.21472
