# Supplementary material for: Knockdown of ATF3 suppresses the progression of ischemic stroke through inhibiting ferroptosis
Source: Frontiers journal article supplement (doi:10.3389/fnmol.2022.1079338), 2023-01-18
Supplement: Data_Sheet_6.ZIP [file Data_Sheet_6.ZIP]

## Sheet: Sheet1
id	baseMean	baseMean_C	baseMean_MCA	foldChange(MCA/C)(MCA/C)	log2FoldChange	pval	padj	Chromosome	Start Site	End Site	Direction	Length	Name	GO	KEGG	EC	eggNOG Class	eggNOG	Description	Entrez_geneID	UniProtAC
ENSRNOG00000029768	27.8433	0	55.6866	Inf	Inf	0.000846123	0.0688385	10	69476775	69478462	+	677	Ccl12	GO:0001525;GO:0002548;GO:0002548;GO:0002687;GO:0003674;GO:0004672;GO:0005125;GO:0005575;GO:0005576;GO:0005576;GO:0005576;GO:0005615;GO:0005615;GO:0006468;GO:0006816;GO:0006874;GO:0006887;GO:0006935;GO:0006954;GO:0006954;GO:0006955;GO:0006955;GO:0007010;GO:0007186;GO:0007267;GO:0008009;GO:0008009;GO:0008009;GO:0008009;GO:0008360;GO:0016004;GO:0030593;GO:0031640;GO:0031727;GO:0043547;GO:0044828;GO:…	K14624	-	W	0A9MF;0J1ST;0VKCZ;13VZX;1D54A;0DVIR;0UW9M;1B6T0	chemokine (C-C motif) ligand 12 [Source:RGD Symbol;Acc:1309255]	287562	D4ABS1
ENSRNOG00000006767	6.00444	0	12.0089	Inf	Inf	0.00202893	0.10993	3	146365092	146373365	+	1140	Cst7	GO:0004869;GO:0004869;GO:0004869;GO:0004869;GO:0004869;GO:0005615;GO:0005615;GO:0005615;GO:0005615;GO:0005737;GO:0005737;GO:0005764;GO:0005764;GO:0005764;GO:0005764;GO:0005768;GO:0005768;GO:0005770;GO:0005770;GO:0005770;GO:0005771;GO:0005771;GO:0005783;GO:0005783;GO:0005783;GO:0005783;GO:0005794;GO:0005794;GO:0005794;GO:0005794;GO:0006955;GO:0006955;GO:0010466;GO:0010466;GO:0010466;GO:0030414;GO:…	K13903	-	O	13U6Y;0A7N3;0J26J;0VIGK;193KU;0DUAH;1B62X;1D3S4;0UVC4	cystatin F [Source:RGD Symbol;Acc:1309154]	296257	D3ZCV2
ENSRNOG00000028043	33.9982	0	67.9964	Inf	Inf	0.00707285	0.20491	14	18820168	18839595	-	1466	Cxcl3	GO:0005125;GO:0005576;GO:0005576;GO:0005576;GO:0005615;GO:0005615;GO:0005615;GO:0006935;GO:0006935;GO:0006935;GO:0006952;GO:0006952;GO:0006954;GO:0006954;GO:0006954;GO:0006955;GO:0006955;GO:0007204;GO:0008009;GO:0008009;GO:0008009;GO:0008009;GO:0008009;GO:0030593;GO:0030593;GO:0030593;GO:0032496;GO:0045236;GO:0061844;GO:0070098;GO:0071222;GO:0071222;GO:0005125;GO:0005576;GO:0005576;GO:0005576;GO:…	K05505	-	S;W	0DVJX;1D4WZ;0J3WE;1B6Q4;0VKBQ;13XHT;0A9A4;0UWC6	chemokine (C-X-C motif) ligand 3 [Source:RGD Symbol;Acc:621812]	171551	Q10746
ENSRNOG00000043088	5.07283	0	10.1457	Inf	Inf	0.00781069	0.215445	1	80800951	80809769	-	2024	Ceacam19	GO:0016020;GO:0016021;	K16825	-	S	1D1K1;1966H;1B4JI;0DQQH;0VEYT;0A3W5;0UU5Z;0IUSJ;13KWV	CEA cell adhesion molecule 19 [Source:RGD Symbol;Acc:1589436]	680640	D3ZE93
ENSRNOG00000051970	3.76452	0	7.52904	Inf	Inf	0.0112692	0.261724	7	141249044	141252578	+	1424	Aqp5	GO:0005783;GO:0005783;GO:0005886;GO:0005886;GO:0005887;GO:0005887;GO:0005902;GO:0005902;GO:0006833;GO:0006833;GO:0006833;GO:0006833;GO:0006833;GO:0009925;GO:0015250;GO:0015250;GO:0015250;GO:0015250;GO:0015267;GO:0015267;GO:0015670;GO:0015670;GO:0015670;GO:0015670;GO:0016020;GO:0016020;GO:0016020;GO:0016021;GO:0016021;GO:0016324;GO:0016324;GO:0030157;GO:0030157;GO:0030659;GO:0030659;GO:0030659;GO:…	K09867	-	-	-	aquaporin 5 [Source:RGD Symbol;Acc:2144]	25241	P47864
ENSRNOG00000050000	4.56653	0	9.13306	Inf	Inf	0.0114388	0.262272	11	86092468	86092779	+	312	AABR07034739.1	GO:0003823;GO:0006910;GO:0006911;GO:0006958;GO:0009897;GO:0034987;GO:0042571;GO:0042742;GO:0045087;GO:0050853;GO:0050871;	-	-	S	0KEZ2;12ZXS;0E0BU;1D8IR;0UYJJ;0VV2A;0AHQF	Ig lambda-2 chain C region [Source:UniProtKB/Swiss-Prot;Acc:P20767]	-	-
ENSRNOG00000018842	8.3116	0	16.6232	Inf	Inf	0.013253	0.280875	18	36713869	36716461	+	2272	Pou4f3	GO:0000978;GO:0000981;GO:0001228;GO:0003677;GO:0003677;GO:0003700;GO:0003700;GO:0005634;GO:0005634;GO:0005654;GO:0005737;GO:0006355;GO:0006357;GO:0007605;GO:0007605;GO:0021562;GO:0031290;GO:0042472;GO:0042491;GO:0043565;GO:0045944;GO:0045944;GO:0048675;GO:0048839;GO:0048839;GO:0050885;GO:0051402;GO:0060113;GO:1990837;	K09366	-	K	0V8HY;12R01;KOG1168;1CTP4;0DIXP;09XK0	POU class 4 homeobox 3 [Source:RGD Symbol;Acc:1310459]	364855	D3ZTL1
ENSRNOG00000020981	3.55075	0	7.1015	Inf	Inf	0.0143518	0.290629	8	119121669	119133546	+	1269	Prss46	GO:0004252;GO:0006508;	-	-	O	0VCN7;0A1SJ;KOG3627;1ARU7;0DPEP;1CYCS;1415G;0UN2N;192UB	protease, serine, 46 [Source:RGD Symbol;Acc:1302970]	408245	Q6IE63
ENSRNOG00000003899	3.62535	0	7.2507	Inf	Inf	0.0151718	0.295302	10	88055823	88122233	-	2133	Krt14	GO:0005198;GO:0005634;GO:0005737;GO:0005882;GO:0007568;GO:0030855;GO:0042633;GO:0045095;GO:0045095;GO:0045110;GO:0045178;GO:0071944;GO:1990254;GO:0005198;GO:0005198;GO:0005882;	K07604	-	Z	09UC4;0DFMN;1AST5;0IFTF;13IBZ;0UM1I;194D9;1CQBB;0V5B8	keratin 14 [Source:RGD Symbol;Acc:1307463]	287701	Q6IFV1
ENSRNOG00000002771	4.5482	0	9.0964	Inf	Inf	0.0157776	0.301887	14	18576355	18591394	-	2098	Ereg	GO:0001819;GO:0001819;GO:0005154;GO:0005154;GO:0005615;GO:0005615;GO:0007173;GO:0007267;GO:0008284;GO:0008284;GO:0008285;GO:0009299;GO:0019221;GO:0032755;GO:0042327;GO:0043616;GO:0045089;GO:0045740;GO:0045740;GO:0045840;GO:0045860;GO:0045892;GO:0048146;GO:0051151;	K09784	-	W;T	1B3K2;192RV;0DU02;0VEDH;0A72S;0IXV0;13RXZ;1D29B;0UFRZ	epiregulin [Source:RGD Symbol;Acc:620299]	59325	Q9Z0L5
ENSRNOG00000061813	3.42865	0	6.85729	Inf	Inf	0.0172165	0.316324	KL567988.1	20093	23908	-	853	Ly6c	GO:0005886;GO:0030550;GO:0033130;GO:0045202;GO:0095500;GO:2000272;	K06846	-	-	-	Ly6-C antigen [Source:RGD Symbol;Acc:621266]	56778	Q63318
ENSRNOG00000008525	33.9803	0	67.9607	Inf	Inf	0.0174292	0.31676	10	86616785	86619157	+	1292	Csf3	GO:0005125;GO:0005125;GO:0005125;GO:0005125;GO:0005125;GO:0005125;GO:0005130;GO:0005130;GO:0005576;GO:0005576;GO:0005576;GO:0005615;GO:0005615;GO:0005615;GO:0006955;GO:0006955;GO:0007165;GO:0008083;GO:0008083;GO:0008284;GO:0008284;GO:0014068;GO:0014068;GO:0019899;GO:0019899;GO:0030838;GO:0030838;GO:0032092;GO:0032092;GO:0033138;GO:0033138;GO:0045471;GO:0045639;GO:0045639;GO:0045639;GO:0045639;GO:…	K05423	-	T	12Q6Y;0A3K8;0IIM2;0UTRV;1CR8B;0DR6Z;192W0;0VEFF;1B3BT	colony stimulating factor 3 [Source:RGD Symbol;Acc:2426]	25610	-
ENSRNOG00000050497	3.85715	0	7.7143	Inf	Inf	0.0175562	0.31676	7	117948706	117956734	+	3113	Zfp7	GO:0000978;GO:0000981;GO:0005634;GO:0006355;GO:0006355;GO:0006357;GO:0046872;GO:0006355;GO:0006355;	-	-	K	KOG1721;KOG1721	zinc finger protein 7 [Source:RGD Symbol;Acc:1310636]	315101	-
ENSRNOG00000042460	3.79273	0	7.58546	Inf	Inf	0.0192795	0.329872	7	65159944	65275408	-	805	Hmga2	GO:0000122;GO:0000122;GO:0000122;GO:0000228;GO:0000228;GO:0000785;GO:0000785;GO:0000976;GO:0000976;GO:0000976;GO:0001228;GO:0001837;GO:0001837;GO:0001837;GO:0002062;GO:0002062;GO:0002062;GO:0003131;GO:0003131;GO:0003131;GO:0003677;GO:0003677;GO:0003680;GO:0003680;GO:0003680;GO:0003712;GO:0003714;GO:0003714;GO:0003714;GO:0003906;GO:0003906;GO:0003906;GO:0005634;GO:0005634;GO:0005634;GO:0005634;GO:…	K09283	-	K;B	1D4AF;0UW8K;193ZG;0IZGR;0DUZR;0VKQA;13T5N;0A8EN;1B6HN	high mobility group AT-hook 2 [Source:RGD Symbol;Acc:620617]	84017	O88791
ENSRNOG00000017027	6.43081	0	12.8616	Inf	Inf	0.0226406	0.355913	15	42708387	42751330	-	2619	Adam2	GO:0004222;GO:0004222;GO:0006508;GO:0006508;GO:0006508;GO:0007155;GO:0007155;GO:0007229;GO:0007338;GO:0007338;GO:0008233;GO:0008237;GO:0008237;GO:0008237;GO:0008542;GO:0009986;GO:0010628;GO:0016020;GO:0016021;GO:0030534;GO:0032991;	K06833	EC:3.4.24.-	O	0DM2Y;1CVY1;0UM9E;1ARB9;13KPB;18X7E;0VAGG;09ZJQ;KOG3607	ADAM metallopeptidase domain 2 [Source:RGD Symbol;Acc:69299]	56806	Q63202
ENSRNOG00000011500	3.09945	0	6.19891	Inf	Inf	0.0262405	0.379899	8	55603968	55631446	+	2527	Pou2af1	GO:0002314;GO:0002314;GO:0003677;GO:0003677;GO:0003713;GO:0003713;GO:0003713;GO:0003713;GO:0032755;GO:0032755;GO:0045944;GO:0045944;GO:0045944;GO:0090575;GO:0090575;GO:0090575;GO:0098586;GO:0098586;	-	-	K	1B30D;09ZPY;0DM1E;1CW30;0UQCF;0IJXZ;190X2;13P2B;0VAKN	POU class 2 homeobox associating factor 1 [Source:RGD Symbol;Acc:1594728]	690528	D4A397
ENSRNOG00000013496	3.19431	0	6.38863	Inf	Inf	0.0268244	0.384015	9	24066303	24088064	+	1431	Crisp3	GO:0005576;GO:0005576;GO:0005576;GO:0005576;GO:0005576;GO:0005615;GO:0042581;GO:0042581;	-	-	O;T;W;V	136J3;09UFX;KOG3017;0V5FA	cysteine-rich secretory protein 3 [Source:RGD Symbol;Acc:619846]	64827	P12020
ENSRNOG00000033173	6.9169	0	13.8338	Inf	Inf	0.0272578	0.387073	1	72644333	72661000	+	3021	Fam71e2	-	-	-	S	0V7UG;196A1;09WWB;0DI6Q;1CSX3;1AX33;13VXJ;0J1KZ;0UKK3	family with sequence similarity 71, member E2 [Source:RGD Symbol;Acc:1310169]	308344	B1WBT2;F8WG83
ENSRNOG00000010835	3.02516	0	6.05032	Inf	Inf	0.0305757	0.402543	5	134767436	134776247	-	4088	Dmbx1	GO:0000122;GO:0000122;GO:0000977;GO:0000977;GO:0000977;GO:0000981;GO:0000981;GO:0000981;GO:0001227;GO:0001227;GO:0003677;GO:0003677;GO:0003677;GO:0003677;GO:0003677;GO:0003700;GO:0003700;GO:0005634;GO:0005667;GO:0005667;GO:0006355;GO:0006355;GO:0006357;GO:0007417;GO:0007417;GO:0007420;GO:0007420;GO:0008343;GO:0008343;GO:0008344;GO:0008344;GO:0042802;GO:0042802;GO:0043565;GO:0043565;GO:0045892;GO:…	K24893	-	K	0UJDC;0DHAE;0V6ZM;1AXR3;09W1A;18ZIF;12PMW;1CS0E;KOG0490	diencephalon/mesencephalon homeobox 1 [Source:RGD Symbol;Acc:1308265]	313512	D3ZMA3
ENSRNOG00000050207	2.94291	0	5.88582	Inf	Inf	0.032249	0.413651	1	212281237	212282363	+	1030	Utf1	GO:0003713;GO:0003713;GO:0005634;GO:0005634;GO:0008584;GO:0045944;GO:0045944;GO:0071837;GO:0071837;	-	-	K	0VFWJ;143QX;0DSTP;18W9J;1AZU2;KOG4282;09VXG;0UUJR;1D1XC	undifferentiated embryonic cell transcription factor 1 [Source:RGD Symbol;Acc:1589375]	681901	B3FIB5
ENSRNOG00000016915	2.73041	0	5.46081	Inf	Inf	0.0457372	0.485095	17	14824734	14828329	-	1492	Barx1	GO:0000977;GO:0000981;GO:0000981;GO:0000981;GO:0003677;GO:0003677;GO:0003677;GO:0005634;GO:0005634;GO:0006355;GO:0006355;GO:0006357;GO:0007267;GO:0007267;GO:0009888;GO:0009888;GO:0009952;GO:0009952;GO:0030178;GO:0030178;GO:0030855;GO:0030855;GO:0048513;GO:0048513;GO:0048536;GO:0048536;GO:0048856;GO:0048856;GO:0055123;GO:0055123;	K09361	-	K	0UPTP;1AZGC;KOG0488;09ZA8;13JQW;1CVM9;0DKSH;0VA7J;18V3V	BARX homeobox 1 [Source:RGD Symbol;Acc:1310884]	364680	D3ZA67
ENSRNOG00000015992	268.475	0.299434	536.651	1792.22	10.8075	0.00704957	0.20491	9	88918433	88921001	+	787	Ccl20	GO:0002548;GO:0005125;GO:0005125;GO:0005576;GO:0005576;GO:0005576;GO:0005615;GO:0005615;GO:0005615;GO:0006935;GO:0006935;GO:0006954;GO:0006954;GO:0006955;GO:0006955;GO:0007186;GO:0008009;GO:0008009;GO:0008009;GO:0008009;GO:0030593;GO:0031731;GO:0031731;GO:0032730;GO:0035584;GO:0035584;GO:0042060;GO:0043547;GO:0048020;GO:0048247;GO:0051770;GO:0060326;GO:0070098;GO:0070374;GO:0071222;GO:0071223;GO:…	K14625	-	O	13XZQ;0J2BK	C-C motif chemokine ligand 20 [Source:RGD Symbol;Acc:3646]	29538	P97884
ENSRNOG00000002792	97.2135	0.628643	193.798	308.28	8.2681	0.00294061	0.13259	14	18731378	18733391	-	1072	Cxcl2	GO:0001975;GO:0002237;GO:0002237;GO:0005125;GO:0005576;GO:0005576;GO:0005576;GO:0005615;GO:0005615;GO:0005615;GO:0005615;GO:0006935;GO:0006935;GO:0006935;GO:0006952;GO:0006952;GO:0006954;GO:0006954;GO:0006955;GO:0006955;GO:0007204;GO:0008009;GO:0008009;GO:0008009;GO:0008009;GO:0009408;GO:0010332;GO:0030593;GO:0030593;GO:0030595;GO:0032355;GO:0042060;GO:0045236;GO:0051384;GO:0061844;GO:0070098;GO:…	K05505	-	S;W	0DVJX;1D4WZ;0J3WE;1B6Q4;0VKBQ;13XHT;0A9A4;0UWC6	C-X-C motif chemokine ligand 2 [Source:RGD Symbol;Acc:70069]	114105	P30348
ENSRNOG00000007159	1024.66	7.30551	2042.01	279.516	8.12679	1.69753e-07	0.00015484	10	69412017	69413870	+	835	Ccl2	GO:0000165;GO:0001664;GO:0001664;GO:0001666;GO:0001912;GO:0001938;GO:0002523;GO:0002544;GO:0002548;GO:0002548;GO:0002687;GO:0002693;GO:0005125;GO:0005125;GO:0005125;GO:0005576;GO:0005576;GO:0005576;GO:0005576;GO:0005615;GO:0005615;GO:0005615;GO:0005615;GO:0005737;GO:0005791;GO:0006874;GO:0006935;GO:0006954;GO:0006954;GO:0006954;GO:0006955;GO:0006955;GO:0007010;GO:0007179;GO:0007186;GO:0007568;GO:…	K14624	-	W	0A9MF;0J1ST;0VKCZ;13VZX;1D54A;0DVIR;0UW9M;1B6T0;1942X	C-C motif chemokine ligand 2 [Source:RGD Symbol;Acc:3645]	24770	P14844
ENSRNOG00000000239	302.483	2.17786	602.788	276.78	8.11259	1.40318e-07	0.000141916	10	69423086	69424979	+	850	Ccl7	GO:0002548;GO:0005125;GO:0005576;GO:0005576;GO:0005576;GO:0005615;GO:0005615;GO:0005615;GO:0005615;GO:0006935;GO:0006954;GO:0006954;GO:0006955;GO:0006955;GO:0007010;GO:0007010;GO:0007186;GO:0008009;GO:0008009;GO:0008009;GO:0008009;GO:0008009;GO:0008201;GO:0008360;GO:0008360;GO:0010332;GO:0030335;GO:0030335;GO:0030593;GO:0031726;GO:0031726;GO:0031727;GO:0031727;GO:0043547;GO:0048020;GO:0048245;GO:…	K05509	-	W	0DW80;0A9MF;0UWUA;0J1ST;1B71A;0VKCZ;1D5FR;13VZX;196I9	C-C motif chemokine ligand 7 [Source:RGD Symbol;Acc:1359152]	287561	Q9QXY8
ENSRNOG00000045654	37.195	0.314321	74.0758	235.669	7.88062	4.48161e-05	0.0113316	20	2699712	2701815	-	2104	LOC108348108	-	K03283	-	O;L	1ATY5;09YID;0USSJ;0V9G5;KOG0101;12PIY;1CUSF;191DD;0DH5C;1ATY5;09YID;0USSJ;0V9G5;KOG0101;12PIY;1CUSF;191DD;0DH5C	heat shock 70 kDa protein 1A [Source:RGD Symbol;Acc:11425585]	108348108	P0DMW1
ENSRNOG00000050647	1267.84	11.9365	2523.75	211.432	7.72405	0.000312251	0.0410083	20	4877324	4879779	-	2456	Hspa1b	-	K03283	-	-	-	heat shock protein family A (Hsp70) member 1B [Source:RGD Symbol;Acc:2840]	24472	P0DMW0;P0DMW1
ENSRNOG00000001414	1819.92	24.323	3615.51	148.646	7.21574	0.000619221	0.0596451	12	22641104	22651482	+	3063	Serpine1	GO:0001525;GO:0002020;GO:0004867;GO:0005102;GO:0005576;GO:0005615;GO:0005615;GO:0010469;GO:0010757;GO:0010951;GO:0014912;GO:0030194;GO:0030336;GO:0032757;GO:0033629;GO:0035491;GO:0045766;GO:0048260;GO:0050729;GO:0050829;GO:0051918;GO:0061044;GO:0062023;GO:0070062;GO:0071222;GO:0090026;GO:0090399;GO:0097187;GO:1901331;GO:1902042;GO:2000098;GO:2000352;	K03982	-	V	12U1A;0DFHY;0UGVD;1ASJ0;09U85;KOG2392;0V57A;1CQ7S;18TF4	serpin family E member 1 [Source:RGD Symbol;Acc:3249]	24617	P20961
ENSRNOG00000017386	207.177	3.43515	410.92	119.622	6.90234	0.014244	0.289734	1	72635267	72643255	+	1691	Il11	GO:0007165;GO:0005125;GO:0005142;GO:0005737;GO:0007165;GO:0008083;GO:0008284;GO:0008284;GO:0033138;GO:0043410;GO:0045944;GO:0046888;GO:0050731;	K05417	-	O;T	0IWMH;192RW;0VI2S;1AVZF;1D3AV;0A6VW;0UV9U;13Q7F;0DTYU	interleukin 11 [Source:RGD Symbol;Acc:621475]	171040	G3V890
ENSRNOG00000007002	192.538	3.38679	381.69	112.7	6.81634	0.000348346	0.0435645	14	84482674	84500642	+	2226	Lif	GO:0001974;GO:0005102;GO:0005125;GO:0005125;GO:0005125;GO:0005125;GO:0005125;GO:0005146;GO:0005146;GO:0005146;GO:0005576;GO:0005576;GO:0005576;GO:0005615;GO:0005829;GO:0006955;GO:0006955;GO:0007260;GO:0007566;GO:0008083;GO:0008083;GO:0008083;GO:0008284;GO:0008284;GO:0008285;GO:0010628;GO:0019827;GO:0030324;GO:0033138;GO:0033141;GO:0033630;GO:0042531;GO:0043410;GO:0045595;GO:0045651;GO:0045835;GO:…	K05419	-	W;K	1AW5H;13KJX;0UKPG;09WYC;0V7WJ;1CSZC;0DI8W;0ITBQ;18X3D	LIF, interleukin 6 family cytokine [Source:RGD Symbol;Acc:620865]	60584	O88211
ENSRNOG00000050251	15.2867	0.299434	30.274	101.104	6.6597	0.00140867	0.0912629	3	114772603	114776155	+	1151	MGC105649	GO:0005634;GO:0009617;	-	-	S	1B6S5;13VC0;0DVHR;1D4UC;0VK77;0UW9E;0J1F7;19410;0A9AE	hypothetical LOC302884 [Source:RGD Symbol;Acc:1359583]	302884	Q5RK28
ENSRNOG00000010478	1402.8	30.6722	2774.92	90.4702	6.49937	0.00910455	0.237873	6	127941526	128080889	+	7022	LOC299282	GO:0005615;GO:0005615;GO:0005615;GO:0005615;GO:0005615;GO:0005615;GO:0005615;GO:0005615;GO:0005615;GO:0005615;GO:0005615;GO:0005615;GO:0005615;GO:0005615;	K04525	-	V	0UM4R;1B1G0;09U5H;KOG2392;12R4F;0V54I;1CQ4S;0DFF0;18T05;KOG2392;KOG2392;KOG1075	Serine protease inhibitor [Source:RGD Symbol;Acc:3745]	24795	P09006
ENSRNOG00000002802	166.463	3.69361	329.233	89.1357	6.47793	0.00317369	0.138223	14	18743685	18745457	-	926	Cxcl1	GO:0005125;GO:0005576;GO:0005576;GO:0005576;GO:0005615;GO:0005615;GO:0006935;GO:0006935;GO:0006935;GO:0006952;GO:0006952;GO:0006955;GO:0006955;GO:0007165;GO:0008009;GO:0008009;GO:0032930;GO:0060326;GO:0070965;GO:1902035;	K05505	-	S;W	0DVJX;1D4WZ;19409;0J3WE;1B6Q4;0VKBQ;13XHT;0A9A4;0UWC6	C-X-C motif chemokine ligand 1 [Source:RGD Symbol;Acc:619869]	81503	P14095
ENSRNOG00000011406	85.3137	1.9119	168.715	88.245	6.46344	0.00159255	0.096001	10	70884531	70886355	+	631	Ccl4	GO:0005125;GO:0005576;GO:0005576;GO:0005576;GO:0005615;GO:0005615;GO:0006935;GO:0006955;GO:0006955;GO:0007165;GO:0008009;GO:0008009;GO:0035690;GO:0060326;	K12964	-	W;T	13X8V;1B6HY;0UVZK;196B4;1D4A0;0DUZ9;0J4I9;0A8E2;0VJA1	C-C motif chemokine ligand 4 [Source:RGD Symbol;Acc:620441]	116637	P50230
ENSRNOG00000011205	45.7713	1.19774	90.3448	75.4297	6.23706	0.00291102	0.132579	10	70869513	70871066	-	757	Ccl3	GO:0000165;GO:0000165;GO:0001649;GO:0001649;GO:0001775;GO:0001775;GO:0002548;GO:0002548;GO:0002548;GO:0004672;GO:0004672;GO:0004698;GO:0004698;GO:0005125;GO:0005576;GO:0005576;GO:0005576;GO:0005576;GO:0005615;GO:0005615;GO:0005615;GO:0005615;GO:0005737;GO:0005737;GO:0005829;GO:0005829;GO:0006468;GO:0006816;GO:0006816;GO:0006874;GO:0006874;GO:0006887;GO:0006887;GO:0006935;GO:0006935;GO:0006954;GO:…	K05408	-	T	196EQ;0UWD3;0DVHK;146RM;1D4YW;1B6KP;0J4I9;0A9HK;0VKER	C-C motif chemokine ligand 3 [Source:RGD Symbol;Acc:3647]	25542	P50229
ENSRNOG00000028259	10.4997	0.299434	20.7	69.1305	6.11125	0.00305876	0.135816	12	2213471	2217433	+	1846	Mcemp1	GO:0016020;GO:0016021;GO:0042802;	-	-	S	196BD;1D2B9;0DT07;0JDQ4;1AXK8;0A8SS;0VJX3;0UUV1;146FG	mast cell-expressed membrane protein 1 [Source:RGD Symbol;Acc:1565374]	498128	D4A545
ENSRNOG00000015366	20.7356	0.598868	40.8724	68.2495	6.09275	0.00339191	0.143271	9	42831742	42839837	-	1362	Neurl3	GO:0016567;GO:0061630;	K15689	EC:2.3.2.27	O	0UT31;0A549;143BT;18XFV;0DRZV;KOG4625;0VG88;1B2QE;1D221	neuralized E3 ubiquitin protein ligase 3 [Source:RGD Symbol;Acc:1359633]	316326	Q5M870
ENSRNOG00000016632	8.95822	0.332903	17.5835	52.8188	5.72298	0.00651402	0.194725	18	15650526	15688284	-	6384	Dsg3	GO:0005509;GO:0005886;GO:0007155;GO:0007156;GO:0016020;GO:0005509;GO:0005886;GO:0007155;GO:0007156;GO:0016020;	K07598	-	Z;U	0UI7C;09TST;1ATSE;1CPSY;0V4S4;0DF33;13JJ4;KOG3594;190JB	desmoglein 3 [Source:RGD Symbol;Acc:1592103]	291752	D3ZL74
ENSRNOG00000037409	30.7713	1.21262	60.33	49.7517	5.63667	0.00326534	0.140866	10	57415832	57436368	-	1152	Scimp	GO:0001726;GO:0001726;GO:0001772;GO:0001772;GO:0001772;GO:0001772;GO:0001772;GO:0002720;GO:0002732;GO:0002732;GO:0016020;GO:0016020;GO:0016020;GO:0016021;GO:0016021;GO:0016021;GO:0030175;GO:0030175;GO:0031256;GO:0031256;GO:0031259;GO:0031259;GO:0031666;GO:0031666;GO:0032735;GO:0032735;GO:0032755;GO:0032755;GO:0032874;GO:0032874;GO:0034138;GO:0034138;GO:0034142;GO:0034142;GO:0034154;GO:0034154;GO:…	-	-	S;T	0A93G;193YH;1B6C3;0VJZV;13U6C;1D4AC;0UW04;0DUZN;0J1IN	SLP adaptor and CSK interacting membrane protein [Source:RGD Symbol;Acc:1593299]	691993	F1LYV1
ENSRNOG00000010513	242.724	10.0209	475.428	47.4437	5.56814	0.0182684	0.323127	4	28947965	28953067	-	1810	Tfpi2	GO:0004867;GO:0004867;GO:0004867;GO:0004867;GO:0005576;GO:0005576;GO:0005576;GO:0005615;GO:0007596;GO:0007599;GO:0010466;GO:0010466;GO:0010466;GO:0010951;GO:0030414;GO:0030414;GO:0030414;GO:0071498;	K23087	-	O	13R6T;0A4PW;0VFIZ;193KG;KOG4295;0DS67;1D1F8;1B2PG;0UUNJ	tissue factor pathway inhibitor 2 [Source:RGD Symbol;Acc:628629]	286926	Q8CF99
ENSRNOG00000054217	7.60173	0.314321	14.8891	47.3691	5.56588	0.00193926	0.108058	5	153507093	153531137	+	1230	Runx3	GO:0003677;GO:0003700;GO:0005524;GO:0005634;GO:0005634;GO:0005654;GO:0005730;GO:0005737;GO:0005829;GO:0006355;GO:0006468;GO:0043231;GO:0045893;GO:0071559;GO:1990837;GO:0003677;GO:0003700;GO:0005524;GO:0005634;GO:0006355;	K09279	-	-	-	RUNX family transcription factor 3 [Source:RGD Symbol;Acc:620082]	156726	Q91ZK1
ENSRNOG00000012280	656.031	28.7455	1283.32	44.6441	5.4804	3.16705e-05	0.00887017	2	158097843	158103653	+	1924	Ptx3	GO:0001550;GO:0001550;GO:0001849;GO:0001849;GO:0001849;GO:0001872;GO:0001872;GO:0001878;GO:0001878;GO:0005615;GO:0005615;GO:0005615;GO:0008228;GO:0008228;GO:0030198;GO:0030198;GO:0031012;GO:0031012;GO:0042802;GO:0042802;GO:0044793;GO:0044869;GO:0044869;GO:0044871;GO:0044871;GO:0045087;GO:0045087;GO:0045087;GO:0045087;GO:0045087;GO:0045429;GO:0045429;GO:0046597;GO:0046597;GO:0046790;GO:0046790;GO:…	-	-	U	1ARH7;0USD5;1CRK4;0A2FB;0DQ2G;0IHCT;0VD2S;18WWI;12U05	pentraxin 3 [Source:RGD Symbol;Acc:1593476]	689388	D3ZT94
ENSRNOG00000010278	116.823	5.41029	228.236	42.1855	5.39868	0.0284648	0.391209	4	3043231	3047807	+	1045	Il6	GO:0001781;GO:0001781;GO:0001878;GO:0002262;GO:0002262;GO:0002314;GO:0002314;GO:0002314;GO:0002384;GO:0002526;GO:0002639;GO:0002639;GO:0002639;GO:0002675;GO:0005102;GO:0005125;GO:0005125;GO:0005125;GO:0005125;GO:0005125;GO:0005138;GO:0005138;GO:0005138;GO:0005138;GO:0005576;GO:0005576;GO:0005576;GO:0005615;GO:0005615;GO:0005615;GO:0005615;GO:0005615;GO:0005737;GO:0005896;GO:0005896;GO:0005896;GO:…	K05405	-	W	0IW11;0VD3S;1D2QU;0UP2D;1B6G6;13QWV;0DQZU;193F5;0A68U	interleukin 6 [Source:RGD Symbol;Acc:2901]	24498	P20607
ENSRNOG00000010208	3210.33	153.726	6266.93	40.7669	5.34933	0.00466575	0.167534	X	1364786	1369384	-	740	Timp1	GO:0002248;GO:0005125;GO:0005515;GO:0005604;GO:0005615;GO:0008191;GO:0008191;GO:0008270;GO:0008284;GO:0010951;GO:0030414;GO:0031012;GO:0043086;GO:0051045;GO:0071492;GO:1901164;GO:1905049;GO:2001044;	K16451	-	O;W	13TYM;0DQST;0VE85;0A3XX;19004;1B53V;0UU4B;1D0Q5;KOG4745	TIMP metallopeptidase inhibitor 1 [Source:RGD Symbol;Acc:621675]	116510	P30120
ENSRNOG00000056209	6.1071	0.299434	11.9148	39.791	5.31437	0.00275926	0.129343	13	93939022	93960342	+	2511	Exo1	GO:0002455;GO:0003677;GO:0003677;GO:0003682;GO:0003824;GO:0004518;GO:0005634;GO:0005654;GO:0005886;GO:0006281;GO:0006298;GO:0006310;GO:0016446;GO:0016604;GO:0016788;GO:0035312;GO:0035312;GO:0045145;GO:0045190;GO:0048256;GO:0051908;	K10746	EC:3.1.-.-	-	-	exonuclease 1 [Source:RGD Symbol;Acc:1309465]	305000	-
ENSRNOG00000007943	5.8557	0.299434	11.412	38.1118	5.25217	0.00382047	0.154011	10	86582612	86595102	+	2910	Gsdma	GO:0001786;GO:0005546;GO:0005737;GO:0005737;GO:0005829;GO:0005886;GO:0006915;GO:0006915;GO:0012501;GO:0016020;GO:0042742;GO:0048471;GO:0048471;GO:0070269;GO:0070273;	K22141	-	S	0VE97;18WGC;13M0A;1D067;0US65;0IH8H;1B03H;0DNZP;0A3EH	gasdermin A [Source:RGD Symbol;Acc:1592062]	360619	D3ZA32
ENSRNOG00000005871	167.458	9.69169	325.225	33.5571	5.06855	0.00449469	0.163325	3	1452644	1468614	+	2040	Il1rn	GO:0005125;GO:0005125;GO:0005125;GO:0005149;GO:0005149;GO:0005149;GO:0005150;GO:0005151;GO:0005152;GO:0005152;GO:0005152;GO:0005576;GO:0005615;GO:0005615;GO:0005615;GO:0006954;GO:0006954;GO:0006955;GO:0006955;GO:0007165;GO:0034115;GO:0045352;GO:0045353;GO:0051384;GO:2000660;GO:2000660;GO:2000660;	K05481	-	W;T	13TYV;0A4QH;0VFJK;0DS6S;192T2;1D1FU;0URDG;0IZQ4;1B5Q8	interleukin 1 receptor antagonist [Source:RGD Symbol;Acc:621159]	60582	P25086
ENSRNOG00000049829	20.5685	1.22751	39.9095	32.5126	5.02293	6.33168e-05	0.014778	4	98337367	98523473	+	1127	AABR07060872.1	GO:0005615;GO:0006955;	-	-	S	1D4BU;0JET2;0DV18;0A9SH;0VKQ1;14622;1D395;196JH;0UWEJ;13VDD;0AB3K;0DTX1;0VM9P;0J107;1B6XQ	-	-	-
ENSRNOG00000003745	297.446	18.3548	576.537	31.4107	4.97319	0.00108015	0.0777239	13	109817728	109849632	-	2909	Atf3	GO:0000122;GO:0000122;GO:0000122;GO:0000976;GO:0000976;GO:0000977;GO:0000977;GO:0000977;GO:0000978;GO:0000978;GO:0000978;GO:0000981;GO:0001227;GO:0001227;GO:0001227;GO:0001228;GO:0001228;GO:0001228;GO:0001709;GO:0003677;GO:0003677;GO:0003677;GO:0003677;GO:0003677;GO:0003700;GO:0003700;GO:0003700;GO:0003700;GO:0005634;GO:0005634;GO:0005634;GO:0005634;GO:0005634;GO:0005634;GO:0005634;GO:0005654;GO:…	K09032	-	K	13JH3;0V8DB;1CTI3;1B4PM;0UMDQ;18WR8;KOG1414;09XF5;0DISV	activating transcription factor 3 [Source:RGD Symbol;Acc:2165]	25389	P29596
ENSRNOG00000002918	72.4971	4.85597	140.138	28.859	4.85095	2.24878e-10	1.02347e-06	10	90988732	90990203	+	1472	FAM187A	GO:0016020;GO:0016021;	-	-	S	12NE2;0DF5R;18X1J;09TVB;0IE2U;0UT4Z;1B338;0V4UJ;1CPVE	family with sequence similarity 187, member A [Source:RGD Symbol;Acc:1307851]	287741	Q6AXV7
ENSRNOG00000017686	77.0661	5.20567	148.926	28.6085	4.83837	0.0131723	0.280471	5	790833	819326	-	1756	Pi15	GO:0005576;GO:0005576;GO:0005615;GO:0006508;GO:0008233;	K24836	-	S;T	0A2D8;0DKFK;0VD8W;KOG3017;1CZ12;190N7;0UNGS;1B3EP;13J2F	peptidase inhibitor 15 [Source:RGD Symbol;Acc:1309577]	301489	F1M2W7
ENSRNOG00000042524	4.80632	0.332903	9.27973	27.8752	4.80091	0.0172616	0.316324	10	94944436	94961791	+	1696	Milr1	GO:0004888;GO:0005887;GO:0007166;GO:0016020;GO:0016021;GO:0033004;GO:0033004;GO:0043303;GO:0043303;GO:0098742;GO:0033004;GO:0043303;	-	-	-	-	mast cell immunoglobulin-like receptor 1 [Source:RGD Symbol;Acc:620488]	-	-
ENSRNOG00000006320	214.737	15.5354	413.938	26.6448	4.73578	0.0198076	0.333577	3	9727408	9738752	-	1254	Ptges	GO:0001516;GO:0001516;GO:0001516;GO:0001516;GO:0001516;GO:0002526;GO:0002544;GO:0004364;GO:0004364;GO:0004364;GO:0004602;GO:0004602;GO:0004602;GO:0004667;GO:0004667;GO:0004667;GO:0005641;GO:0005641;GO:0005737;GO:0005737;GO:0005737;GO:0006629;GO:0006631;GO:0006633;GO:0006693;GO:0006693;GO:0006693;GO:0008285;GO:0008285;GO:0014070;GO:0016020;GO:0016021;GO:0016021;GO:0016021;GO:0016021;GO:0016491;GO:…	K15729	EC:5.3.99.3	I	0DR0J;1D3D6;0IY81;13RWR;0A6VT;0VHPZ;1B5E2;1934B;0UPHP	prostaglandin E synthase [Source:RGD Symbol;Acc:62076]	59103	Q9JHF3
ENSRNOG00000010516	101.602	7.42819	195.775	26.3557	4.72004	0.00551611	0.181265	15	3644769	3650819	-	1875	Plau	GO:0001666;GO:0004252;GO:0004252;GO:0004252;GO:0005615;GO:0006508;GO:0006508;GO:0006508;GO:0008233;GO:0008236;GO:0008236;GO:0008236;GO:0009986;GO:0010469;GO:0014909;GO:0014910;GO:0016301;GO:0016310;GO:0016787;GO:0030335;GO:0031639;GO:0031639;GO:0031639;GO:0033628;GO:0042127;GO:0042730;GO:2000097;	K01348	EC:3.4.21.73	O	0V8M3;0UMGJ;132AH;0DIUV;1CTK6;0IGFI;0A2MM;18ZU8;1AWZ7	plasminogen activator, urokinase [Source:RGD Symbol;Acc:3343]	25619	Q3KR76
ENSRNOG00000062295	8.96316	0.665805	17.2605	25.9243	4.69623	0.00135066	0.0889325	7	143874734	143878705	+	2650	Gm9918	-	-	-	-	-	predicted gene 9918 [Source:MGI Symbol;Acc:MGI:3646315]	-	-
ENSRNOG00000022859	16.0376	1.26467	30.8106	24.3625	4.60659	0.000814075	0.0688385	9	14727976	14809447	-	1027	Trem1	GO:0002526;GO:0038023;	K14362	-	T	1967I;0A7B0;0UUXD;0J3SD;0VI5H;1B5DQ;13YAU;1D33N;0DU5D	triggering receptor expressed on myeloid cells 1 [Source:RGD Symbol;Acc:1309467]	301229	-
ENSRNOG00000010490	16.0515	1.27956	30.8234	24.089	4.5903	0.0113448	0.262092	5	169338097	169339142	+	647	Hes2	GO:0003677;GO:0006355;GO:0046983;GO:1990837;	K09087	-	K	193MR;0DU9V;0UVFJ;1B5KV;13TVD;1D3MK;0A7GX;KOG4304;0VIBW	hes family bHLH transcription factor 2 [Source:RGD Symbol;Acc:62082]	29567	P35429
ENSRNOG00000004649	49.8272	4.02651	95.6278	23.7495	4.56983	0.00488836	0.171674	3	121876263	121882726	-	1396	Il1b	GO:0000165;GO:0000187;GO:0001660;GO:0001934;GO:0005125;GO:0005125;GO:0005125;GO:0005125;GO:0005125;GO:0005149;GO:0005149;GO:0005149;GO:0005178;GO:0005576;GO:0005576;GO:0005576;GO:0005576;GO:0005615;GO:0005615;GO:0005615;GO:0005615;GO:0005615;GO:0005737;GO:0005764;GO:0005829;GO:0006954;GO:0006954;GO:0006954;GO:0006954;GO:0006955;GO:0006955;GO:0008284;GO:0008285;GO:0009743;GO:0010573;GO:0010575;GO:…	K04519	-	T;V	0DRYM;1CWH6;18TT7;0VFAB;0UPAA;13ME0;0IGSZ;1ASW1;0A43M	interleukin 1 beta [Source:RGD Symbol;Acc:2891]	24494	Q5BKB0
ENSRNOG00000056153	7.30511	0.598868	14.0114	23.3964	4.54822	0.0024747	0.122716	5	151692108	151700246	+	2539	Tent5b	GO:1990817;	K23033	EC:2.7.7.-	-	-	terminal nucleotidyltransferase 5B [Source:RGD Symbol;Acc:1308967]	313019	B0BNK8
ENSRNOG00000046699	56.7747	4.65885	108.89	23.3728	4.54676	0.00349049	0.145078	3	160799981	160802433	-	856	Slpi	GO:0003674;GO:0003677;GO:0003729;GO:0004866;GO:0004867;GO:0004867;GO:0005575;GO:0005576;GO:0005576;GO:0005615;GO:0005615;GO:0006955;GO:0010951;GO:0019731;GO:0019731;GO:0019899;GO:0030414;GO:0030414;GO:0032091;GO:0032496;GO:0035821;GO:0045071;GO:0045087;GO:0045087;GO:0050728;GO:0052547;	K23638	-	-	-	secretory leukocyte peptidase inhibitor [Source:RGD Symbol;Acc:621768]	84386	Q9WUQ4
ENSRNOG00000024952	45.9298	4.10834	87.7512	21.3593	4.41679	0.00207074	0.111203	18	60013382	60095354	-	6028	Atp8b1	GO:0000166;GO:0000166;GO:0000166;GO:0000287;GO:0000287;GO:0003674;GO:0005319;GO:0005319;GO:0005524;GO:0005524;GO:0005524;GO:0005654;GO:0005783;GO:0005783;GO:0005783;GO:0005794;GO:0005794;GO:0005794;GO:0005802;GO:0005829;GO:0005886;GO:0005886;GO:0005886;GO:0005886;GO:0005886;GO:0005887;GO:0005887;GO:0006855;GO:0006855;GO:0007030;GO:0007605;GO:0007605;GO:0008150;GO:0008206;GO:0008206;GO:0015247;GO:…	K01530	EC:7.6.2.1	P	1DEEG;0B0RP;0E78M;0V2D3;14TYS;1BA9D;196WC;0WD8Z;0KDRM	ATPase phospholipid transporting 8B1 [Source:RGD Symbol;Acc:1308488]	291555	-
ENSRNOG00000018311	3.4597	0.314321	6.60508	21.0138	4.39326	0.0468243	0.493001	1	197815413	197821936	-	2512	Cd19	GO:0001923;GO:0001923;GO:0002322;GO:0002322;GO:0002322;GO:0002322;GO:0005887;GO:0005887;GO:0005887;GO:0009897;GO:0009897;GO:0009897;GO:0009897;GO:0016020;GO:0016021;GO:0016064;GO:0016064;GO:0019724;GO:0019724;GO:0032991;GO:0032991;GO:0043552;GO:0043552;GO:0043552;GO:0050851;GO:0050851;GO:0050853;GO:0050853;GO:0050853;GO:0050855;GO:0050855;GO:0050855;GO:0050864;GO:0050864;GO:0050864;GO:0050864;GO:…	K06465	-	T	1B0ZB;1CQGD;0IJ3V;0UH8E;0DFSY;09UH4;0V5GE;13HCE;18V72	CD19 molecule [Source:RGD Symbol;Acc:1309086]	365367	F1LNH2
ENSRNOG00000026235	40.2726	3.74197	76.8033	20.5248	4.3593	0.00663413	0.197667	17	10137974	10152956	+	3277	Hk3	GO:0000166;GO:0001678;GO:0001678;GO:0004340;GO:0004396;GO:0004396;GO:0004396;GO:0004396;GO:0005524;GO:0005524;GO:0005524;GO:0005536;GO:0005536;GO:0005975;GO:0005975;GO:0006096;GO:0006096;GO:0006096;GO:0016301;GO:0016310;GO:0016740;GO:0016773;GO:0016773;GO:0019318;GO:0046835;GO:0051156;GO:0000166;GO:0001678;GO:0001678;GO:0004340;GO:0004396;GO:0004396;GO:0004396;GO:0004396;GO:0004396;GO:0005524;GO:…	K00844	EC:2.7.1.1	G	09TDH;0UJHP;18YQV;12P4I;KOG1369;1AXD3;0V4CM;0DIJA;1D1CB	hexokinase 3 [Source:RGD Symbol;Acc:2798]	25060	P27926
ENSRNOG00000002723	67.7566	6.36064	129.153	20.305	4.34376	0.00295135	0.13259	13	82355471	82365341	+	3514	Sele	GO:0007155;GO:0016020;GO:0002092;GO:0004888;GO:0005615;GO:0005886;GO:0005887;GO:0005901;GO:0005905;GO:0007155;GO:0007155;GO:0007155;GO:0007157;GO:0007159;GO:0007202;GO:0016020;GO:0016020;GO:0016020;GO:0016021;GO:0030029;GO:0030246;GO:0030863;GO:0033691;GO:0043274;GO:0045121;GO:0046872;GO:0048471;GO:0050901;GO:0070492;GO:0070555;	K06494	-	W;T;V	0DGZB;0UIZN;1ASJK;KOG4297;1CRPH;13KIC;18XTT;09VQR;0V6PT	selectin E [Source:RGD Symbol;Acc:3654]	25544	P98105
ENSRNOG00000036703	119.084	11.4268	226.741	19.8428	4.31055	1.10497e-05	0.00379546	1	199555722	199576932	+	4673	Itgax	GO:0007155;GO:0008284;GO:0008305;GO:0009897;GO:0009986;GO:0010628;GO:0010628;GO:0030335;GO:0030971;GO:0031643;GO:0034113;GO:0045766;GO:0051607;GO:1905956;	K06462	-	W	1DEZI;0WGDS;1974K;0B3YP;0V2Z3;1BAVV;13CB3;0E803;0IPBA	integrin subunit alpha X [Source:RGD Symbol;Acc:1561123]	499271	-
ENSRNOG00000014117	1127.94	112.853	2143.04	18.9897	4.24714	3.34599e-05	0.00922935	19	14508616	14515456	+	1566	Hmox1	GO:0002246;GO:0004392;GO:0004392;GO:0005198;GO:0005634;GO:0005783;GO:0006788;GO:0006788;GO:0006879;GO:0006979;GO:0016239;GO:0016242;GO:0020037;GO:0034101;GO:0034395;GO:0034605;GO:0035094;GO:0042167;GO:0042168;GO:0042802;GO:0042803;GO:0043065;GO:0045766;GO:0048471;GO:0048661;GO:0048662;GO:0055072;GO:0055114;GO:0071243;GO:0071276;GO:0071456;GO:0072719;GO:0090050;GO:1902042;GO:1903589;	K00510	EC:1.14.14.18	P	0DKYK;1B1BX;1D12W;0A1IP;0VAKY;KOG4480;18VDY;0UPPE;139TG	heme oxygenase 1 [Source:RGD Symbol;Acc:2806]	24451	P06762
ENSRNOG00000010665	9.19366	0.980127	17.4072	17.7601	4.15057	0.000813712	0.0688385	10	87057136	87067456	-	1426	Ccr7	GO:0002408;GO:0002408;GO:0002606;GO:0002606;GO:0002885;GO:0002885;GO:0002922;GO:0002922;GO:0004930;GO:0004930;GO:0004930;GO:0004950;GO:0004950;GO:0005739;GO:0005886;GO:0005886;GO:0005886;GO:0005886;GO:0006935;GO:0006935;GO:0006935;GO:0006935;GO:0006954;GO:0006954;GO:0006955;GO:0006955;GO:0006955;GO:0006955;GO:0006955;GO:0007165;GO:0007186;GO:0007186;GO:0007186;GO:0007204;GO:0009897;GO:0009897;GO:…	K04182	-	T	13IRZ;0DEJ4;09T7V;1CP8Z;0IMBE;18XTR;0V46V;1AVXW;0UFI1	C-C motif chemokine receptor 7 [Source:RGD Symbol;Acc:735151]	287673	Q6U2D6
ENSRNOG00000012886	342.482	36.5941	648.37	17.7179	4.14713	0.00389434	0.154592	7	120580743	120592095	+	1941	Maff	GO:0000978;GO:0000981;GO:0001228;GO:0001228;GO:0001701;GO:0001701;GO:0003677;GO:0003677;GO:0003677;GO:0003700;GO:0003700;GO:0005634;GO:0005634;GO:0005654;GO:0005739;GO:0006355;GO:0006355;GO:0006357;GO:0035914;GO:0035914;GO:0043565;GO:0043565;GO:0045604;GO:0045604;GO:0045604;GO:0045944;GO:0045944;GO:1990837;GO:1990837;	K09037	-	K	0VETP;13PV3;0DRIE;0UUE2;0A3YU;1AYB2;KOG4196;193BP;1CXHH	MAF bZIP transcription factor F [Source:RGD Symbol;Acc:1309531]	366960	D3ZC87
ENSRNOG00000020136	39.824	4.33714	75.3108	17.3642	4.11804	0.00211095	0.112368	15	34378148	34392066	-	3377	Tgm1	GO:0003810;GO:0003810;GO:0010838;GO:0016020;GO:0018149;GO:0018149;GO:0030216;GO:0031224;GO:0042802;GO:0045787;	K05619	EC:2.3.2.13	O	0V54T;12WTW;0IFMV;09U5T;18XJJ;1D059;0DFFC;0UJVS;1AUCQ	transglutaminase 1 [Source:RGD Symbol;Acc:61838]	60335	P23606
ENSRNOG00000007319	22.247	2.44013	42.0539	17.2343	4.10721	0.00915084	0.237942	3	147813473	147819571	-	1935	Trib3	GO:0000122;GO:0003714;GO:0003714;GO:0004672;GO:0005524;GO:0005634;GO:0005654;GO:0006468;GO:0006469;GO:0006469;GO:0010827;GO:0019899;GO:0019901;GO:0019901;GO:0031625;GO:0032092;GO:0032869;GO:0034976;GO:0043405;GO:0045599;GO:0045717;GO:0045892;GO:0051443;GO:0055106;GO:0070059;	K19518	-	T;K	0UFUB;KOG0583;1B0GJ;0DET1;192BC;09TG4;1CPGU;0V4F6;13N9B	tribbles pseudokinase 3 [Source:RGD Symbol;Acc:708432]	246273	Q9WTQ6
ENSRNOG00000023528	5.49097	0.613755	10.3682	16.893	4.07836	0.0143032	0.290351	1	222907159	222937633	+	1458	Plaat5	GO:0004623;GO:0004623;GO:0004623;GO:0004623;GO:0004623;GO:0005737;GO:0005737;GO:0005829;GO:0008970;GO:0008970;GO:0008970;GO:0008970;GO:0008970;GO:0016410;GO:0016410;GO:0016410;GO:0016410;GO:0016740;GO:0016746;GO:0016787;GO:0052739;GO:0052740;GO:0070292;GO:0070292;GO:0070292;GO:0070292;GO:0102567;GO:0102568;	K23278	EC:2.3.1.-	S;O	0US1R;0A12V;1CXN5;0DNQU;1B23I;0VBZ3;192TG;141HB;0J8WF	phospholipase A and acyltransferase 5 [Source:RGD Symbol;Acc:1308376]	293711	Q4KLN5
ENSRNOG00000036726	7.84839	0.913189	14.7836	16.189	4.01694	0.00291454	0.132579	10	103599103	103619083	-	2989	Cd300e	GO:0004888;GO:0005886;GO:0016020;GO:0016021;	K06719	-	T	196YT;0B1CN;145H6;0JCED;1BAF9;0E6M7;1DDJF;0WDY0;0V1UE	Cd300e molecule [Source:RGD Symbol;Acc:1585137]	690076	D0V9T4
ENSRNOG00000038445	5.5683	0.665805	10.4708	15.7265	3.97513	0.0152618	0.29618	1	65657276	65659945	-	2286	Rnf225	GO:0016020;GO:0016021;GO:0046872;	-	-	O	0UTC3;KOG2177;0A5UJ;196N2;0DRIS;1AWRT;1CZVK;14EAH;0VGPV	ring finger protein 225 [Source:RGD Symbol;Acc:1561909]	502300	D3ZF25
ENSRNOG00000005731	139.086	16.8706	261.302	15.4886	3.95314	0.00870674	0.232073	8	6048969	6076598	-	2263	Birc3	GO:0004842;GO:0005634;GO:0005634;GO:0005634;GO:0005737;GO:0005737;GO:0005737;GO:0006915;GO:0007283;GO:0016567;GO:0016740;GO:0031398;GO:0031398;GO:0032991;GO:0042326;GO:0042981;GO:0042981;GO:0042981;GO:0043027;GO:0043066;GO:0043066;GO:0043154;GO:0044877;GO:0045121;GO:0046872;GO:0051726;GO:0060544;GO:0060546;GO:0060546;GO:0061630;GO:0070266;GO:0071356;GO:1901222;GO:1902916;GO:2000378;GO:0004842;GO:…	K16060	-	O;T;D	09XU3;13HTW;KOG1101;1AXBT;0DJ69;0UH8Q;0V8RR;1CTY4;194HC	baculoviral IAP repeat-containing 3 [Source:RGD Symbol;Acc:621282]	78971	Q5XIW4;F7FLN8
ENSRNOG00000002946	334.31	40.6058	628.014	15.4661	3.95104	0.000110047	0.022766	10	106975178	106976040	-	863	Socs3	GO:0001784;GO:0001932;GO:0007259;GO:0007259;GO:0009968;GO:0009968;GO:0016567;GO:0035556;GO:0035556;GO:0040008;GO:0042532;GO:0043066;GO:0043066;GO:0045595;GO:0045597;GO:0046426;GO:0046627;GO:0050728;GO:0060670;GO:0060674;GO:0060707;GO:0060708;GO:1990830;	K04696	-	T	0DS95;191EU;0A4T3;KOG4566;13IYN;0VFMZ;1CZRN;1AX90;0UR4C	suppressor of cytokine signaling 3 [Source:RGD Symbol;Acc:621087]	89829	O88583
ENSRNOG00000003544	12.3171	1.51206	23.1221	15.2918	3.93469	0.000350217	0.0435645	10	73333119	73362783	+	3254	Tbx4	GO:0000978;GO:0000981;GO:0001525;GO:0001525;GO:0001525;GO:0001708;GO:0002009;GO:0002009;GO:0003674;GO:0003677;GO:0003700;GO:0003700;GO:0005575;GO:0005634;GO:0005634;GO:0005634;GO:0006355;GO:0006355;GO:0006357;GO:0008150;GO:0030324;GO:0030324;GO:0030326;GO:0030326;GO:0030326;GO:0035108;GO:0035108;GO:0035108;GO:0035116;GO:0035116;GO:0048705;GO:0048705;GO:1990401;GO:1990401;	K10178	-	K	0UKP1;12SBZ;1CTPC;0V6G9;1AW54;KOG3585;0DIXX;09XK8;18WSR	T-box transcription factor 4 [Source:RGD Symbol;Acc:1309057]	303399	D4A0A2
ENSRNOG00000017819	296.352	36.4378	556.266	15.2662	3.93227	6.08345e-09	1.1065e-05	18	29560365	29562153	-	1698	Cd14	GO:0001530;GO:0001530;GO:0001530;GO:0001819;GO:0002237;GO:0002237;GO:0002376;GO:0005515;GO:0005515;GO:0005576;GO:0005615;GO:0005794;GO:0005794;GO:0005794;GO:0005886;GO:0005886;GO:0006898;GO:0006898;GO:0006954;GO:0006954;GO:0006954;GO:0009408;GO:0009617;GO:0009617;GO:0009617;GO:0009897;GO:0009897;GO:0009897;GO:0009897;GO:0009986;GO:0016020;GO:0031225;GO:0031362;GO:0031362;GO:0031362;GO:0031663;GO:…	K04391	-	T;W	18TM4;13RSN;0UIW7;09VP7;0V6N2;0DGXI;1B430;0IXG9;1CRMT	CD14 molecule [Source:RGD Symbol;Acc:620588]	60350	Q63691
ENSRNOG00000020655	4.79293	0.598868	8.987	15.0067	3.90753	0.0282458	0.390882	8	117727877	117728764	+	888	Ucn2	GO:0001664;GO:0005179;GO:0005179;GO:0005576;GO:0005576;GO:0005576;GO:0005615;GO:0005615;GO:0007189;GO:0007586;GO:0007586;GO:0009755;GO:0042562;GO:0051429;GO:0051431;GO:0051431;	K05257	-	F;T	0J5CP;1B6W5;0UWP3;0VKGE;0AAF8;0DW6I;1D5GE;1489A	urocortin 2 [Source:RGD Symbol;Acc:620765]	170896	A1YKY4
ENSRNOG00000039447	10.5988	1.33161	19.866	14.9188	3.89906	0.0109791	0.258237	8	36815007	36817747	-	999	Pate4	GO:0001669;GO:0005615;GO:0009611;GO:0030548;GO:0050804;GO:0099601;	-	-	O	0DWX2;0AJZI;1B741;0VYGA;0KGVE;1D652;0UWZE;12W8R	prostate and testis expressed 4 [Source:RGD Symbol;Acc:1311172]	363041	D4AE27
ENSRNOG00000010165	317.666	41.3813	593.951	14.3531	3.84329	0.0322408	0.413651	6	135890931	135903647	+	3797	Tnfaip2	GO:0000145;GO:0000145;GO:0000145;GO:0000149;GO:0006887;GO:0006887;GO:0006887;GO:0051601;	K19989	-	U	0VDJS;18TZB;KOG2286;1B41V;133HT;1CZDD;0A2PZ;0UTGX;0DQBF	TNF alpha induced protein 2 [Source:RGD Symbol;Acc:1594556]	299339	D3ZYQ3
ENSRNOG00000023546	1986.27	262.12	3710.41	14.1554	3.82328	1.69641e-08	2.37563e-05	12	23839399	23841049	-	879	Hspb1	GO:0001932;GO:0005080;GO:0005634;GO:0005634;GO:0005634;GO:0005737;GO:0005737;GO:0005737;GO:0005819;GO:0005856;GO:0005886;GO:0006469;GO:0008426;GO:0009615;GO:0019901;GO:0030018;GO:0032731;GO:0032760;GO:0035556;GO:0035924;GO:0038033;GO:0042802;GO:0042803;GO:0043122;GO:0043292;GO:0043536;GO:0044183;GO:0045766;GO:0061077;GO:0061629;GO:0099641;GO:1902176;GO:2001028;GO:2001234;	K04455	-	O	1CQAZ;1AZ7Y;09UBS;0V5AU;18YXM;KOG3591;0DFMC;0UKIC;13KJ7	heat shock protein family B (small) member 1 [Source:RGD Symbol;Acc:61306]	24471	G3V913
ENSRNOG00000002794	38.74	5.18709	72.293	13.9371	3.80086	0.00894845	0.236413	13	82429063	82464628	+	3182	Selp	GO:0001530;GO:0002687;GO:0005509;GO:0005615;GO:0005886;GO:0005887;GO:0006954;GO:0007155;GO:0007155;GO:0007155;GO:0007157;GO:0007159;GO:0007159;GO:0008201;GO:0009897;GO:0009897;GO:0010572;GO:0014068;GO:0016020;GO:0016020;GO:0016020;GO:0016020;GO:0016021;GO:0016339;GO:0030246;GO:0031092;GO:0033623;GO:0033691;GO:0033691;GO:0035584;GO:0042806;GO:0046872;GO:0048306;GO:0050900;GO:0050901;GO:0050901;GO:…	K06496	-	T;V	0E9VB;1BB8S;0WJTD;0IS44;1DGP4;0V428;197BT;13EQ3;0B700	selectin P [Source:RGD Symbol;Acc:3656]	25651	P98106
ENSRNOG00000014350	379.775	51.1142	708.436	13.8599	3.79284	0.00626771	0.192652	2	251529354	251532312	-	1984	Ccn1	GO:0001649;GO:0001934;GO:0002041;GO:0003181;GO:0003278;GO:0003281;GO:0005178;GO:0005515;GO:0005520;GO:0005520;GO:0005576;GO:0005576;GO:0005576;GO:0007155;GO:0007165;GO:0007165;GO:0010518;GO:0010811;GO:0030198;GO:0030335;GO:0030335;GO:0030501;GO:0030513;GO:0033690;GO:0043065;GO:0043066;GO:0043280;GO:0044319;GO:0045597;GO:0045669;GO:0045860;GO:0045944;GO:0050840;GO:0060413;GO:0060591;GO:0060710;GO:…	K06829	-	W	13MDU;0IIY0;0V98S;0DJQX;1AY1V;0UN0I;1CUHY;09YB6;18Z05	cellular communication network factor 1 [Source:RGD Symbol;Acc:620763]	83476	Q9ES72;Q66HT5
ENSRNOG00000016734	7.24708	0.980127	13.514	13.788	3.78535	0.0267011	0.383657	3	156901077	156905892	-	2440	Emilin3	GO:0005515;GO:0005737;GO:0005737;GO:0042802;GO:0042802;	K24246	-	S	1367V;0V73J;0DHEI;0IIJ1;1AV22;09W59;1CS4I;0UJJD;191NF	elastin microfibril interfacer 3 [Source:RGD Symbol;Acc:1309607]	362262	D3ZQ65
ENSRNOG00000009334	4.67242	0.632336	8.71251	13.7783	3.78432	0.0297109	0.397418	3	110618298	110638046	+	1549	Knstrn	GO:0000070;GO:0000226;GO:0000776;GO:0000776;GO:0001726;GO:0005886;GO:0007051;GO:0007051;GO:0007059;GO:0007059;GO:0016477;GO:0034451;GO:0035371;GO:0042803;GO:0051010;GO:0051988;GO:0051988;GO:0071364;GO:0072686;	-	-	Z	0IKUT;19476;0DKXX;1B4N0;13HZ7;1CVSX;0UQ03;0VACE;09ZFE	kinetochore-localized astrin/SPAG5 binding protein [Source:RGD Symbol;Acc:1303240]	311325	Q6AXN6
ENSRNOG00000042533	7.29126	0.998708	13.5838	13.6014	3.76568	0.00575733	0.184529	3	82762862	82777814	-	2167	Accsl	GO:0003824;GO:0003824;GO:0009058;GO:0009058;GO:0030170;GO:0030170;	-	-	T;E	12WTK;1AT54;KOG0256;1955B;0V92T;1CXW0;0A3ME;0UHIP;0DNC2	1-aminocyclopropane-1-carboxylate synthase-like [Source:RGD Symbol;Acc:1596039]	690470	D3ZUW2
ENSRNOG00000014320	207.435	28.7273	386.142	13.4417	3.74864	0.0032731	0.140867	17	51898217	51912496	-	2554	Inhba	GO:0000082;GO:0000082;GO:0000082;GO:0001541;GO:0001541;GO:0001541;GO:0001707;GO:0001707;GO:0001942;GO:0001942;GO:0001942;GO:0002244;GO:0002244;GO:0002244;GO:0002244;GO:0005102;GO:0005102;GO:0005125;GO:0005125;GO:0005125;GO:0005125;GO:0005179;GO:0005179;GO:0005179;GO:0005576;GO:0005576;GO:0005576;GO:0005576;GO:0005576;GO:0005615;GO:0005615;GO:0006357;GO:0006357;GO:0006357;GO:0007050;GO:0007050;GO:…	K04667	-	T	0V7ND;13QY5;KOG3900;09WPX;195NP;0DHZK;0UI57;1CSQ8;1B33Q	inhibin subunit beta A [Source:RGD Symbol;Acc:62074]	29200	P18331
ENSRNOG00000056092	8.61344	1.21262	16.0143	13.2063	3.72315	0.0050261	0.173866	8	13614800	13680870	-	3399	Hephl1	GO:0004322;GO:0004322;GO:0004322;GO:0005507;GO:0005507;GO:0005886;GO:0006811;GO:0006826;GO:0006879;GO:0006879;GO:0016020;GO:0016021;GO:0016491;GO:0016491;GO:0016491;GO:0016491;GO:0046872;GO:0055072;GO:0055114;	K14735	EC:1.16.3.1	-	-	hephaestin-like 1 [Source:RGD Symbol;Acc:1564835]	500946	-
ENSRNOG00000046258	8.88279	1.26098	16.5046	13.0887	3.71025	0.00239893	0.12031	11	84919066	84931160	-	4198	B3gnt5	GO:0000139;GO:0005794;GO:0005794;GO:0006486;GO:0006486;GO:0006486;GO:0006486;GO:0007275;GO:0007417;GO:0007417;GO:0007420;GO:0007420;GO:0008375;GO:0008376;GO:0008457;GO:0008457;GO:0008457;GO:0008457;GO:0016020;GO:0016020;GO:0016020;GO:0016021;GO:0016740;GO:0016757;GO:0016758;GO:0047256;GO:0047256;	K03766	EC:2.4.1.206	G	09TX1;KOG2287;1CPX1;0UGDY;1AS2W;18SWV;0DF7G;0V4W5;12Y0M	UDP-GlcNAc:betaGal beta-1,3-N- acetylglucosaminyltransferase 5 [Source:RGD Symbol;Acc:70955]	116740	Q99NB2
ENSRNOG00000003895	69.5877	9.99279	129.183	12.9276	3.69238	0.000207394	0.0350786	13	61066153	61070599	-	1366	Rgs1	GO:0001965;GO:0005096;GO:0005096;GO:0005829;GO:0007165;GO:0007186;GO:0008277;GO:0009617;GO:0031234;GO:0043547;GO:0061737;	K16449	-	T	KOG3589	regulator of G-protein signaling 1 [Source:RGD Symbol;Acc:3561]	54289	P97844
ENSRNOG00000022707	48.6744	7.01716	90.3316	12.873	3.68627	0.00513629	0.175434	2	93827504	93831419	+	1347	Pmp2	GO:0005504;GO:0005504;GO:0005737;GO:0008289;GO:0008289;GO:0015485;GO:0015485;GO:0043209;GO:0043209;GO:0061024;GO:0061024;GO:0061024;GO:0061024;	K24977	-	I	1964B;13PZ6;0DTR9;KOG4015;0VHJR;0UV3H;0A6RS;1D336;1B5J6	peripheral myelin protein 2 [Source:RGD Symbol;Acc:1585218]	688790	D3ZFG5
ENSRNOG00000036673	8.5953	1.26467	15.9259	12.5929	3.65454	0.00478761	0.169569	10	110251363	110259985	-	1160	Sectm1b	GO:0005125;GO:0005125;GO:0006955;GO:0006955;GO:0006955;GO:0007165;GO:0016020;GO:0016021;GO:0016021;GO:0016021;	-	-	-	-	secreted and transmembrane 1B [Source:RGD Symbol;Acc:735132]	287884	E9PTB4
ENSRNOG00000023005	10.1829	1.51206	18.8537	12.4689	3.64026	0.00839711	0.225599	X	80359555	80363168	+	2717	LOC681325	GO:0034121;GO:0034121;GO:0035751;	-	-	S	0IVMI;1CZX6;0A365;1AU7J;0DQTI;195VU;13IGV;0UQ4U;0VE12	predicted gene 6377 [Source:MGI Symbol;Acc:MGI:3647255]	681325	D4A907
ENSRNOG00000046449	4.32826	0.665805	7.99072	12.0016	3.58515	0.0435861	0.477219	4	79573998	79581208	+	575	Npy	GO:0005179;GO:0005179;GO:0005576;GO:0005576;GO:0005576;GO:0007218;	-	-	T;W	193ID;1D46I;0A89E;0J0KC;0VJ5A;0DUVK;1B6F9;13TA2;0UW2H	neuropeptide Y [Source:RGD Symbol;Acc:3197]	-	-
ENSRNOG00000012049	79.1274	12.1727	146.082	12.0008	3.58506	1.50084e-05	0.00487907	15	47293699	47300460	+	3282	Sox7	GO:0000976;GO:0000976;GO:0000978;GO:0000981;GO:0000981;GO:0000981;GO:0001706;GO:0001706;GO:0003674;GO:0003700;GO:0003700;GO:0003700;GO:0005575;GO:0005634;GO:0005634;GO:0005634;GO:0005737;GO:0005737;GO:0005737;GO:0006355;GO:0006357;GO:0006357;GO:0008150;GO:0008285;GO:0008285;GO:0009653;GO:0030154;GO:0043280;GO:0043280;GO:0043565;GO:0043565;GO:0045892;GO:0045892;GO:0045893;GO:0045893;GO:0060828;GO:…	K09270	-	K	0B4CG;0V33M;1BAYX;13CXF;0WGV4;0E883;1976H;0IPZD;1DF6W	SRY-box transcription factor 7 [Source:RGD Symbol;Acc:1310038]	290317	D3ZTE1
ENSRNOG00000000187	589.535	90.6943	1088.38	12.0005	3.58502	2.4878e-05	0.00742465	7	119554354	119568776	+	3333	Csf2rb	GO:0004896;GO:0005515;GO:0016020;GO:0016021;GO:0019221;	K04738	-	W;T	0UI7U;0IGEX;1B2E2;0VATT;1CWB6;12RW9;09Z09;0DMFV;1955X	colony stimulating factor 2 receptor beta common subunit [Source:RGD Symbol;Acc:620189]	171081	Q78ZF5
ENSRNOG00000010805	7.85397	1.21262	14.4953	11.9537	3.57938	0.0064962	0.194717	2	93792601	93797305	+	667	Fabp4	GO:0005504;GO:0005504;GO:0008289;GO:0008289;GO:0050727;GO:0050727;GO:0120162;GO:0005324;GO:0005504;GO:0005634;GO:0005737;GO:0006469;GO:0008289;GO:0009617;GO:0015909;GO:0036041;GO:0042632;GO:0045892;GO:0050727;GO:0050729;GO:0050872;GO:0050873;GO:0051427;GO:0071285;GO:0071356;GO:0120162;	K08753	-	I	13QG7;KOG4015;0VHGU;0A7EJ	fatty acid binding protein 4 [Source:RGD Symbol;Acc:69309]	79451	Q5XFV4;Q9R290
ENSRNOG00000011490	7.96354	1.2312	14.6959	11.9362	3.57727	0.0132429	0.280875	8	22856539	22858565	+	878	Angptl8	GO:0005576;GO:0005576;GO:0005576;GO:0010954;GO:0010954;GO:0019216;GO:0019216;GO:0019216;GO:0019216;GO:0019216;GO:0019216;GO:0044255;GO:0044255;GO:0045444;GO:0045444;GO:0048469;GO:0048469;GO:0050746;GO:0050746;GO:0050746;GO:0070328;GO:0070328;GO:0070328;GO:0070328;GO:0070328;GO:0070328;	K22289	-	S	0VHMT;13VRG;192SX;0UPEU;0J1RV;09Z1B;1B5IK;0DU6G;1D08X	angiopoietin-like 8 [Source:RGD Symbol;Acc:2320121]	100361444	D3ZMI0
ENSRNOG00000036728	6.19676	0.965239	11.4283	11.8398	3.56558	0.0139469	0.28781	10	103467725	103481153	-	4120	Cd300lb	GO:0002446;GO:0004888;GO:0005886;GO:0016020;GO:0016021;GO:0033005;GO:0071222;	K20395	-	T	144P9;19379;1B5K8;0UVB7;0JBZ0;1D3E8;0VIWZ;0DU2A;0A7EX	CD300 molecule-like family member b [Source:RGD Symbol;Acc:1583718]	501738	D0V7N0
ENSRNOG00000043416	129.461	20.2853	238.636	11.764	3.55631	6.27201e-06	0.00235697	1	80730499	80744831	-	1885	Bcl3	GO:0005515;GO:0005634;GO:0005654;GO:0005737;GO:0005829;GO:0005886;GO:0006351;GO:0006974;GO:0007249;GO:0008134;GO:0009615;GO:0010225;GO:0030330;GO:0030496;GO:0032717;GO:0032991;GO:0032996;GO:0033257;GO:0042771;GO:0042981;GO:0043066;GO:0043231;GO:0045727;GO:0045892;GO:0045893;GO:0046426;GO:0051101;GO:1901222;	K09258	-	S;K;E	192I2;13MDS;1CTIZ;KOG0504;0VD0G;1AWHJ;0A24Y;0UT49;0DPT6	BCL3, transcription coactivator [Source:RGD Symbol;Acc:1589465]	680611	-
ENSRNOG00000055672	74.0809	11.7412	136.421	11.619	3.53842	0.00389275	0.154592	6	99839960	99843245	-	1007	Gpx2	GO:0004602;GO:0006979;GO:0055114;	-	-	-	-	glutathione peroxidase 2 [Source:RGD Symbol;Acc:727780]	-	-
ENSRNOG00000008412	52.4731	8.40832	96.5379	11.4812	3.52121	0.00589737	0.187315	4	168832910	168851652	+	2092	Gprc5a	GO:0004930;GO:0004930;GO:0005730;GO:0005886;GO:0005886;GO:0005886;GO:0005886;GO:0007175;GO:0007186;GO:0007186;GO:0016020;GO:0016021;GO:0016021;GO:0016021;GO:0030295;GO:0031982;GO:0031982;GO:0032147;GO:0043231;GO:0043231;GO:0043235;GO:0070062;	K08468	-	T	0DNXG;0VC5K;1CXUV;1AY9A;192GF;0UNIR;12SSQ;0IIGU;0A19U	G protein-coupled receptor, class C, group 5, member A [Source:RGD Symbol;Acc:1310804]	312790	A1A5R2
ENSRNOG00000018752	73.6009	12.0128	135.189	11.2537	3.49233	4.14803e-05	0.0106359	1	219468675	219472654	+	2257	Clcf1	GO:0005102;GO:0005125;GO:0005127;GO:0005576;GO:0008284;GO:0042531;GO:0043524;GO:0097058;GO:0097059;	K05421	-	T	13QUJ;0VFD4;0DNAE;0UGU6;1CX7B;0IVWG;0A3N0	cardiotrophin-like cytokine factor 1 [Source:RGD Symbol;Acc:1303171]	365395	Q4KMB8
ENSRNOG00000003546	361.589	59.3309	663.847	11.1889	3.484	5.65277e-07	0.00034877	10	12995904	12997930	-	963	Tnfrsf12a	GO:0001726;GO:0005515;GO:0005886;GO:0005886;GO:0005886;GO:0005886;GO:0006931;GO:0007155;GO:0009986;GO:0016020;GO:0016021;GO:0043065;GO:0043065;GO:0043065;GO:0043065;GO:0045765;GO:0045773;GO:0061041;GO:0061041;GO:0097191;GO:2001238;GO:2001238;GO:2001238;	K05149	-	T	0IYHX;193HS;0A898;1B683;0DV15;0VJ50;0UW5T;1D4KA;13SI8	TNF receptor superfamily member 12A [Source:RGD Symbol;Acc:631329]	302965	Q80XX9
ENSRNOG00000018371	808.498	133.009	1483.99	11.157	3.47988	0.000371805	0.0448259	18	63130542	63140181	+	1751	Tubb6	GO:0000166;GO:0000226;GO:0000278;GO:0003924;GO:0003924;GO:0003924;GO:0005200;GO:0005200;GO:0005200;GO:0005525;GO:0005525;GO:0005525;GO:0005525;GO:0005737;GO:0005737;GO:0005856;GO:0005874;GO:0005874;GO:0005874;GO:0005874;GO:0005874;GO:0005874;GO:0007017;GO:0007017;	K07375	-	Z	0UFQ4;0DEPX;KOG1375;09TCM;12NDK;1CPDK;0V4BS;1B0XY	tubulin, beta 6 class V [Source:RGD Symbol;Acc:1305887]	307351	Q4QQV0
ENSRNOG00000059947	173.969	28.8907	319.048	11.0433	3.4651	2.61167e-05	0.00766862	6	33885495	33908016	+	3067	Sdc1	GO:0008022;GO:0009897;GO:0009986;GO:0009986;GO:0016020;GO:0042060;GO:0042802;GO:0048627;GO:0055002;GO:0060070;GO:1903543;GO:1903553;	K06257	-	-	-	syndecan 1 [Source:RGD Symbol;Acc:3648]	25216	P26260
ENSRNOG00000056219	134.15	22.3701	245.93	10.9937	3.4586	0.00505219	0.173866	4	163239849	163261958	-	3776	Olr1	GO:0016020;GO:0016021;	K08763	-	-	-	oxidized low density lipoprotein receptor 1 [Source:RGD Symbol;Acc:620515]	140914	O70156;A0A0G2K1K0
ENSRNOG00000011250	243.99	40.9911	446.989	10.9045	3.44686	0.0116639	0.263181	4	85381889	85386231	-	1108	Inmt	GO:0004790;GO:0004790;GO:0004790;GO:0005829;GO:0005829;GO:0005829;GO:0008168;GO:0008168;GO:0008168;GO:0008170;GO:0009308;GO:0016740;GO:0030748;GO:0030748;GO:0032259;GO:0032259;	K00562	-	S;E	195T5;1CV0E;1B2K7;0DK6F;0IFTZ;09YS0;13VIK;0V9PT;0UFKF	indolethylamine N-methyltransferase [Source:RGD Symbol;Acc:1597087]	368066	D3ZNJ5
ENSRNOG00000058087	7.28847	1.2424	13.3345	10.7329	3.42397	0.0230621	0.358858	1	63679769	63684189	-	1034	Lilrc2	-	K06512	-	-	-	leukocyte immunoglobulin-like receptor, subfamily C, member 2 [Source:RGD Symbol;Acc:1589872]	690906	D4AAQ4
ENSRNOG00000018003	61.0423	10.4486	111.636	10.6843	3.41742	0.000797476	0.068806	2	25222328	25235275	-	2975	F2rl1	GO:0001965;GO:0002286;GO:0002690;GO:0002720;GO:0004930;GO:0004930;GO:0004930;GO:0005769;GO:0005886;GO:0005887;GO:0007186;GO:0007186;GO:0007204;GO:0007204;GO:0007596;GO:0010804;GO:0014068;GO:0015057;GO:0016021;GO:0030193;GO:0030335;GO:0030836;GO:0031143;GO:0031274;GO:0031681;GO:0032682;GO:0032722;GO:0032722;GO:0032729;GO:0032731;GO:0032733;GO:0032755;GO:0032757;GO:0032930;GO:0034137;GO:0034140;GO:…	K04234	-	T	1AT52;0UP7N;1CQ23;18TQ1;09YVG;0IGEM;12SCP;0V9T9;0DFCD	F2R like trypsin receptor 1 [Source:RGD Symbol;Acc:620866]	116677	Q63645
ENSRNOG00000037931	63.8187	11.0382	116.599	10.5633	3.40098	0.0116367	0.263181	1	81328183	81344708	+	1025	Plaur	GO:0001934;GO:0005102;GO:0005886;GO:0009986;GO:0019899;GO:0019904;GO:0030162;GO:0030377;GO:0034112;GO:0038195;GO:0043066;GO:0043388;GO:0045742;GO:0090200;GO:2001243;GO:2001268;GO:0030162;GO:0030377;GO:0038195;	K03985	-	T	18SAP;0VDEG;0UTFT;1B369;13PEG;1CZ7C;0DFNR;0A2IM;0IJ50	plasminogen activator, urokinase receptor [Source:RGD Symbol;Acc:620597]	50692	P49616
ENSRNOG00000019330	109.692	19.0132	200.37	10.5385	3.3976	0.00635426	0.193121	3	151285249	151289595	+	1470	Procr	GO:0005813;GO:0038023;GO:0050819;	K06557	-	W;T	13Q2F;1B2KY;0DRFT;0VEQK;18Y8Y;0IWW5;0UMZV;0A3VY;1D0N4	protein C receptor [Source:RGD Symbol;Acc:1305991]	362248	Q4V8I1
ENSRNOG00000009153	8.50943	1.49717	15.5217	10.3674	3.37398	0.0394935	0.458036	4	145377431	145390497	-	2364	Cidec	GO:0005829;GO:0006915;GO:0006915;GO:0034389;GO:0097194;GO:0005634;GO:0005783;GO:0005811;GO:0005829;GO:0006915;GO:0006915;GO:0006915;GO:0006915;GO:0034389;GO:0042981;GO:0097194;	-	-	S;K	18VV5;0IWQS;1AW5X;0URZJ;0DPWE;0A3GX;13QV5;0VEBW;1CYVW	cell death-inducing DFFA-like effector c [Source:RGD Symbol;Acc:1562113]	-	-
ENSRNOG00000029597	19.3933	3.43884	35.3478	10.279	3.36163	0.0310656	0.405257	10	92783703	92793145	-	657	AABR07030544.1	-	-	-	-	-	-	-	-
ENSRNOG00000005660	5.61361	0.998708	10.2285	10.2417	3.35639	0.0275982	0.38931	6	49968473	49974728	+	3111	Fam110c	GO:0005938;GO:0030335;GO:0043014;GO:0051897;GO:0060491;	-	-	Z;O	12N8Y;0VCW3;0IE0E;193E0;0DPNW;1B1Z8;1CUC4;0A20Y;0UT03	family with sequence similarity 110, member C [Source:RGD Symbol;Acc:1564713]	500638	Q5RKJ0
ENSRNOG00000005037	24.1719	4.32976	44.0141	10.1655	3.34561	0.000258589	0.0370679	3	100366168	100427030	+	3500	Kif18a	GO:0000070;GO:0000166;GO:0000776;GO:0001726;GO:0001726;GO:0003674;GO:0003774;GO:0003777;GO:0003777;GO:0003777;GO:0003779;GO:0003779;GO:0005524;GO:0005524;GO:0005524;GO:0005575;GO:0005634;GO:0005634;GO:0005634;GO:0005737;GO:0005737;GO:0005828;GO:0005828;GO:0005871;GO:0005874;GO:0005874;GO:0005901;GO:0005901;GO:0007018;GO:0007018;GO:0007018;GO:0007019;GO:0007019;GO:0007019;GO:0007080;GO:0007080;GO:…	K10401	-	Z	12RJM;1CPG1;0UFSZ;1ARMY;09TF8;0DESB;KOG0242;18US5;0V4EB	kinesin family member 18A [Source:RGD Symbol;Acc:1561740]	362186	D3ZIA5
ENSRNOG00000007281	1626.67	294.127	2959.22	10.061	3.3307	0.0158758	0.302321	4	56711049	56738791	+	9098	Flnc	GO:0005515;GO:0003779;GO:0005515;GO:0005737;GO:0005737;GO:0005737;GO:0005829;GO:0005856;GO:0005886;GO:0008092;GO:0008092;GO:0016020;GO:0016528;GO:0030018;GO:0030506;GO:0030506;GO:0030506;GO:0042383;GO:0042383;GO:0042383;GO:0043034;GO:0048747;GO:0048747;	K04437	-	Z	1AYP6;0V4XN;0UM1B;KOG0518;18UG9;0DIHA;09TYR;1CT7V;12NFR	filamin C [Source:RGD Symbol;Acc:1308807]	362332	D3ZHA0
ENSRNOG00000047943	11.9516	2.17047	21.7326	10.0129	3.32378	0.00146583	0.0933059	1	90957133	90962466	-	1442	LOC108348106	GO:0016491;GO:0016491;GO:0055114;	-	-	S;E	1CVE2;1B3KZ;KOG3200;0DPMJ;0UTIS;0VCUW;12U7Y;19289;0A1ZN	alpha-ketoglutarate-dependent dioxygenase alkB homolog 6 [Source:RGD Symbol;Acc:11413490]	-	-
ENSRNOG00000014378	28.3012	5.1591	51.4433	9.97137	3.31779	0.00217579	0.11448	9	46840992	46881264	+	1439	Il1r2	GO:0004908;GO:0004908;GO:0004908;GO:0004910;GO:0004910;GO:0005737;GO:0010955;GO:0016020;GO:0016021;GO:0019221;GO:0019966;GO:0032690;GO:1900016;GO:2000660;	K04387	-	T	13JKH;1AUSK;0UJ9N;0DH7J;1CRXR;09VYU;0IJCQ;0V6X6;18ZQ1	interleukin 1 receptor type 2 [Source:RGD Symbol;Acc:621147]	117022	P43303
ENSRNOG00000033192	245.526	45.7055	445.346	9.74381	3.28449	0.000837473	0.0688385	2	56110777	56151531	-	2894	Osmr	GO:0004896;GO:0004924;GO:0005515;GO:0005900;GO:0008284;GO:0016020;GO:0016324;GO:0019838;GO:0034097;GO:0038165;GO:0004896;GO:0005515;GO:0016020;	K05057	-	W;T	0V9S1;09YU5;0UMMA;18ZNE;13IDN;1AUIC;1CV2Q;0DK8V;0IFCQ	oncostatin M receptor [Source:RGD Symbol;Acc:1302983]	310132	Q65Z14
ENSRNOG00000007060	965.2	181.231	1749.17	9.65159	3.27077	0.00947183	0.243896	5	104984414	105010857	-	1860	Plin2	GO:0003674;GO:0005634;GO:0005634;GO:0005737;GO:0005737;GO:0005811;GO:0005811;GO:0005811;GO:0005811;GO:0005811;GO:0005829;GO:0005829;GO:0005829;GO:0005886;GO:0005886;GO:0010890;GO:0014070;GO:0015909;GO:0015909;GO:0019915;GO:0019915;GO:0019915;GO:0042493;	K17284	-	U	1CWV7;0A0CC;0DMZ6;0VB8H;18SFU;0UHNB;13HK9;0IJG1;1AT8Z	perilipin 2 [Source:RGD Symbol;Acc:728889]	298199	Q5U2U5
ENSRNOG00000029865	11.4793	2.16297	20.7956	9.61437	3.26519	0.0434531	0.477219	9	94279155	94283919	+	1824	Prss56	GO:0002690;GO:0004252;GO:0004252;GO:0004252;GO:0004252;GO:0005615;GO:0005783;GO:0005783;GO:0006508;GO:0006508;GO:0006508;GO:0006508;GO:0006508;GO:0007596;GO:0008233;GO:0008236;GO:0016787;GO:0043010;GO:0043010;GO:0043010;	K23440	EC:3.4.21.-	O;E	0VE9T;1D06S;KOG3627;0UU4M;195T4;13IXX;0A3EY;1B054;0DQ5R	serine protease 56 [Source:RGD Symbol;Acc:1563955]	363274	D3ZQJ8
ENSRNOG00000048449	24.6318	4.65516	44.6084	9.58257	3.26041	0.000459299	0.0512978	10	92667869	92783410	+	2391	Itgb3	GO:0005178;GO:0005178;GO:0007155;GO:0007155;GO:0007155;GO:0007229;GO:0007229;GO:0007229;GO:0008305;GO:0008305;GO:0016020;GO:0016021;GO:0070527;GO:0070527;GO:0001954;GO:0005080;GO:0005178;GO:0005178;GO:0005925;GO:0007044;GO:0007155;GO:0007160;GO:0007229;GO:0008305;GO:0009897;GO:0009986;GO:0010628;GO:0010763;GO:0016324;GO:0019899;GO:0030334;GO:0030335;GO:0032880;GO:0032956;GO:0033690;GO:0035866;GO:…	-	-	W	KOG1226	integrin subunit beta 3 [Source:RGD Symbol;Acc:628868]	-	-
ENSRNOG00000020552	247.946	47.1803	448.712	9.51058	3.24953	0.00286935	0.13191	1	220826560	220835066	+	1663	Fosl1	GO:0000977;GO:0000977;GO:0000978;GO:0000978;GO:0000978;GO:0000978;GO:0000981;GO:0001228;GO:0001701;GO:0001701;GO:0003677;GO:0003677;GO:0003677;GO:0003677;GO:0003700;GO:0003700;GO:0005634;GO:0005634;GO:0005634;GO:0005634;GO:0005634;GO:0005654;GO:0005654;GO:0005829;GO:0006355;GO:0006355;GO:0006357;GO:0006357;GO:0006357;GO:0007296;GO:0007296;GO:0007565;GO:0007612;GO:0008285;GO:0009612;GO:0009629;GO:…	K04502	-	K	0VE9S;1AV5K;1954H;KOG1414;0UJNM;13REE;0A3EX;0DHGN;1CS70	FOS like 1, AP-1 transcription factor subunit [Source:RGD Symbol;Acc:2627]	25445	P10158
ENSRNOG00000026306	36.3767	6.99858	65.7547	9.39544	3.23196	0.00253943	0.123811	4	68808359	68819928	-	3982	Clec5a	GO:0001618;GO:0001618;GO:0001819;GO:0002076;GO:0009986;GO:0016020;GO:0016021;GO:0030099;GO:0033033;GO:0043066;GO:0045087;GO:0045087;GO:0046718;GO:0001618;GO:0001618;GO:0001618;GO:0001618;GO:0001819;GO:0001819;GO:0002076;GO:0002076;GO:0005829;GO:0005886;GO:0009986;GO:0009986;GO:0016020;GO:0016021;GO:0030099;GO:0030099;GO:0033033;GO:0033033;GO:0043066;GO:0043066;GO:0045087;GO:0045087;GO:0045087;GO:…	-	-	T;V	0VCNG;1933D;13V5K;0USSP;0A1SS;1CYD3;0DPF0;KOG4297;1AS6W	C-type lectin domain containing 5A [Source:RGD Symbol;Acc:1584755]	-	-
ENSRNOG00000002776	21.2353	4.08607	38.3846	9.39403	3.23174	0.0177622	0.318673	13	82369493	82387631	+	1762	Sell	GO:0002020;GO:0005509;GO:0005887;GO:0007155;GO:0016020;GO:0016339;GO:0050901;GO:0070492;	K06495	-	T;W;V	197BM;13EPF;0IS3T;0B5FA;1BB8F;1DFSM;0E8VY;0V3GE;0WI2K	selectin L [Source:RGD Symbol;Acc:3655]	29259	Q63762
ENSRNOG00000015562	4.78547	0.93177	8.63918	9.27179	3.21285	0.0489271	0.500296	5	25391115	25443718	+	3575	Cdh17	GO:0002314;GO:0002314;GO:0002315;GO:0002315;GO:0005178;GO:0005178;GO:0005427;GO:0005427;GO:0005427;GO:0005509;GO:0005509;GO:0005509;GO:0005654;GO:0005886;GO:0005886;GO:0005886;GO:0005886;GO:0005886;GO:0006857;GO:0006857;GO:0006857;GO:0007155;GO:0007155;GO:0007155;GO:0007156;GO:0007156;GO:0007156;GO:0007156;GO:0007156;GO:0007156;GO:0007229;GO:0007229;GO:0009986;GO:0009986;GO:0016020;GO:0016020;GO:…	K06811	-	Z;W;U	13NNR;0V8DN;18UUB;0UIDY;KOG3594;1CR9R;1ATXY;09XFF;0DGJW	cadherin 17 [Source:RGD Symbol;Acc:619748]	117048	P55281
ENSRNOG00000018681	148.33	29.3968	267.264	9.09161	3.18454	0.0178153	0.31922	2	187344056	187352969	+	6085	Nes	GO:0005737;GO:0005882;GO:0005882;GO:0007399;GO:0019215;GO:0019215;GO:0043524;GO:0048858;GO:0019215;	K07609	-	Z	09TM8;1B0H2;13HI2;191DE;0V4K8;0UG0F;0DEXQ;1CPME;0IRNV	nestin [Source:RGD Symbol;Acc:3162]	25491	G3V8F8
ENSRNOG00000018646	458.462	90.9873	825.936	9.07749	3.18229	0.000544714	0.055884	18	29329764	29340403	-	2305	Hbegf	GO:0005154;GO:0005154;GO:0005615;GO:0005615;GO:0005887;GO:0007173;GO:0007173;GO:0008016;GO:0008083;GO:0008083;GO:0008201;GO:0008201;GO:0008284;GO:0009986;GO:0016477;GO:0030335;GO:0035313;GO:0048661;GO:0050731;GO:0051549;GO:0051897;GO:0060326;GO:0090303;	K08523	-	T	0IMHM;18XRI;0DIV7;13N5C;0V8FS;09XHR;1CTKI;0UHI0;1AWZI	heparin-binding EGF-like growth factor [Source:RGD Symbol;Acc:2526]	25433	Q06175
ENSRNOG00000013090	793.874	158.172	1429.58	9.0381	3.17602	0.000541256	0.055884	17	13391467	13393243	-	1090	Gadd45g	GO:0000185;GO:0000185;GO:0000185;GO:0000186;GO:0005634;GO:0005634;GO:0005634;GO:0005634;GO:0005634;GO:0005737;GO:0005737;GO:0005737;GO:0006469;GO:0006915;GO:0007275;GO:0030154;GO:0042802;GO:0043065;GO:0043065;GO:0046330;GO:0046330;GO:0051726;GO:0051726;GO:0051726;GO:0051726;GO:0120162;GO:0120162;GO:1900745;GO:1900745;	K04402	-	T;D;L	0IW58;0DJIS;192VU;1AXT2;13PDM;0A34J;1CUBC;0UN9X;0VDZH	growth arrest and DNA-damage-inducible, gamma [Source:RGD Symbol;Acc:1311796]	291005	Q9WTQ7;B5DEF0
ENSRNOG00000058568	157.523	31.6787	283.368	8.94506	3.16109	0.0187044	0.326272	3	55623634	55648325	+	4111	Dhrs9	GO:0055114;	K11149	EC:1.1.-.-	-	-	dehydrogenase/reductase 9 [Source:RGD Symbol;Acc:620655]	170635	Q8VD48
ENSRNOG00000047606	66.4299	13.5303	119.33	8.81946	3.14069	0.0058807	0.187165	8	96551245	96559483	+	834	Bcl2a1	GO:0005575;GO:0005739;GO:0005741;GO:0006915;GO:0006915;GO:0007568;GO:0008630;GO:0021987;GO:0042803;GO:0042981;GO:0042981;GO:0043066;GO:0043066;GO:0044877;GO:0046982;GO:0051400;GO:0097192;	K02162	-	T	192MA;1CPFD;0A0GW;0DERK;0UFS5;KOG4728;1ARKX;0V569;13S3B	BCL2-related protein A1 [Source:RGD Symbol;Acc:620621]	170929	Q925A9
ENSRNOG00000030012	8.95579	1.83007	16.0815	8.78737	3.13543	0.00726655	0.206699	4	155792761	155867708	-	1284	Clec4a2	GO:0030246;	K10057	-	T;V	1953C;0DMIX;13Q9N;1AWSU;0UUEM;KOG4297;0VFYN;1D1TH;0A53A	C-type lectin domain family 4, member A2 [Source:RGD Symbol;Acc:1359163]	297584	Q5YIS1
ENSRNOG00000040287	505.437	103.44	907.434	8.77254	3.13299	0.0444924	0.480765	6	2307808	2316722	-	5499	Cyp1b1	GO:0004497;GO:0004497;GO:0004497;GO:0005506;GO:0005506;GO:0006805;GO:0006805;GO:0008202;GO:0008202;GO:0016020;GO:0016491;GO:0016705;GO:0016705;GO:0020037;GO:0020037;GO:0042572;GO:0042572;GO:0046872;GO:0055114;GO:0004497;GO:0004497;GO:0004497;GO:0005506;GO:0005506;GO:0006805;GO:0006805;GO:0008202;GO:0008202;GO:0016020;GO:0016021;GO:0016491;GO:0016705;GO:0016705;GO:0020037;GO:0020037;GO:0042572;GO:…	K07410	EC:1.14.14.1	Q	12TUJ;1CTM5;0V4F9;09TG8;KOG0156;0DET4	cytochrome P450, family 1, subfamily b, polypeptide 1 [Source:RGD Symbol;Acc:2460]	25426	Q64678
ENSRNOG00000016278	10.5355	2.15928	18.9117	8.75835	3.13066	0.00429524	0.160084	19	10619220	10620671	-	282	Ccl17	GO:0002548;GO:0005125;GO:0005575;GO:0005576;GO:0005576;GO:0005576;GO:0005615;GO:0005615;GO:0006935;GO:0006954;GO:0006955;GO:0006955;GO:0007186;GO:0008009;GO:0008009;GO:0008009;GO:0008150;GO:0030593;GO:0031729;GO:0043547;GO:0045662;GO:0048020;GO:0048247;GO:0070098;GO:0070374;GO:0071346;GO:0071347;GO:0071356;	K21083	-	O	0VKMD;1D52X;1B6CZ;0DVSN;193ZA;13UJT;0UWBB;0J0QF;0A9PX	C-C motif chemokine ligand 17 [Source:RGD Symbol;Acc:619924]	117518	Q9ERE0
ENSRNOG00000012779	211.986	43.5496	380.422	8.73538	3.12687	6.68578e-09	1.1065e-05	16	56813791	56900052	-	5876	Msr1	GO:0005044;GO:0006898;GO:0016020;	K06558	-	W	0A0WI;1AYTK;0IK8A;13KR0;1CXF3;0VBT1;0URV4;190AD;0DNHQ	macrophage scavenger receptor 1 [Source:RGD Symbol;Acc:1564316]	498638	-
ENSRNOG00000006094	1141.77	242.19	2041.36	8.42875	3.07532	2.74635e-05	0.00781207	3	92696313	92783658	-	3973	Cd44	GO:0004896;GO:0005540;GO:0005540;GO:0005540;GO:0005794;GO:0005829;GO:0005886;GO:0005902;GO:0007155;GO:0007155;GO:0007155;GO:0009986;GO:0016020;GO:0016021;GO:0016021;GO:0016021;GO:0016324;GO:0016477;GO:0019221;GO:0030214;GO:0031258;GO:0033138;GO:0034116;GO:0035692;GO:0042110;GO:0042995;GO:0042995;GO:0043066;GO:0043154;GO:0043518;GO:0044319;GO:0044344;GO:0050731;GO:0051216;GO:0070374;GO:0070487;GO:…	K06256	-	W;T	1B3SZ;18UX2;1CUI9;0UNIM;13SK8;0DJR6;09YBF;0V990;0IZCP	CD44 molecule (Indian blood group) [Source:RGD Symbol;Acc:2307]	25406	O08779
ENSRNOG00000016696	361.019	76.7647	645.274	8.40587	3.0714	0.00446081	0.163312	16	75966352	76016195	+	2443	Angpt2	GO:0001525;GO:0001525;GO:0001525;GO:0001525;GO:0001666;GO:0003674;GO:0005102;GO:0005576;GO:0005615;GO:0005615;GO:0005615;GO:0005634;GO:0005886;GO:0007275;GO:0007281;GO:0009314;GO:0009612;GO:0009749;GO:0010467;GO:0010467;GO:0010812;GO:0010812;GO:0014070;GO:0014823;GO:0016525;GO:0016525;GO:0030154;GO:0030971;GO:0030971;GO:0030971;GO:0030971;GO:0030971;GO:0031100;GO:0042995;GO:0043537;GO:0043537;GO:…	K05466	-	S;W;T;E;V	1AS0K;09TS9;13CXA;1CPSF;0DF2N;KOG2579;0UG7I;18WN4;0V4RJ	angiopoietin 2 [Source:RGD Symbol;Acc:621861]	89805	O35462
ENSRNOG00000014838	79.037	17.0175	141.057	8.28894	3.05119	3.94406e-06	0.00159559	5	59416076	59446647	+	920	Glipr2	GO:0000139;GO:0005576;GO:0010634;GO:0010718;GO:0042803;GO:0070374;	K24835	-	S;T	0DNDW;18UA2;12TIJ;1CXB4;KOG3017;0A2BQ;0URQZ;1B2EQ;0VEM6	GLI pathogenesis-related 2 [Source:RGD Symbol;Acc:1583669]	679819	-
ENSRNOG00000014156	17.1517	3.72339	30.58	8.21294	3.0379	0.000454394	0.0510632	3	2642531	2646648	+	2300	Fut7	GO:0005794;GO:0006486;GO:0006486;GO:0006486;GO:0008417;GO:0008417;GO:0016020;GO:0016020;GO:0016020;GO:0016021;GO:0016740;GO:0016757;GO:0032580;GO:0036065;GO:0001807;GO:0002361;GO:0002522;GO:0002523;GO:0002523;GO:0005794;GO:0005794;GO:0005802;GO:0005802;GO:0006486;GO:0006486;GO:0006486;GO:0006486;GO:0006486;GO:0006672;GO:0006672;GO:0006954;GO:0007566;GO:0007566;GO:0008417;GO:0008417;GO:0008417;GO:…	K07635	EC:2.4.1.-	G;E	0DND2;1CWH9;0VF77;12PZ7;1B1P7;0A4CD;1954B;KOG2619;0URPX	fucosyltransferase 7 [Source:RGD Symbol;Acc:735019]	296564	Q712G6
ENSRNOG00000058780	13.0038	2.84367	23.1639	8.14577	3.02605	0.00193983	0.108058	14	87448692	87453785	+	1528	Igfbp1	GO:0005520;GO:0005520;GO:0005576;GO:0005615;GO:0005794;GO:0031994;GO:0031995;	K23578	-	-	-	insulin-like growth factor binding protein 1 [Source:RGD Symbol;Acc:2872]	25685	P21743
ENSRNOG00000026676	9.46162	2.09604	16.8272	8.02811	3.00506	0.00962023	0.246382	5	153976535	153978847	+	1574	LOC500567	-	-	-	-	-	similar to RIKEN cDNA 1700029M20 [Source:RGD Symbol;Acc:1566032]	500567	Q5PQS8
ENSRNOG00000039593	59.426	13.1807	105.671	8.01713	3.00309	0.00106738	0.0774966	18	28506934	28516209	-	1320	Ecscr	GO:0005829;GO:0005829;GO:0005886;GO:0005886;GO:0016020;GO:0016021;GO:0016525;GO:0016525;GO:1901800;GO:1901800;GO:2000353;GO:2000353;	-	-	T	0A7Z8;1B6C5;193XM;0UVRV;0VIUI;0DUCF;0J4RP;13X34;1D40I	endothelial cell surface expressed chemotaxis and apoptosis regulator [Source:RGD Symbol;Acc:1594804]	689248	M0RCJ4
ENSRNOG00000026060	41.27	9.18953	73.3504	7.98196	2.99674	0.0234016	0.361652	18	56180089	56186068	+	1722	Arsi	GO:0003824;GO:0003824;GO:0005576;GO:0005783;GO:0008484;GO:0008484;GO:0016787;GO:0046872;	K12375	EC:3.1.6.-	T;D;P;G;L;B	12QD7;0DGBG;0V61R;1CRJN;18S5Y;1ARF7;09V22;KOG3867;0US42	arylsulfatase family, member I [Source:RGD Symbol;Acc:1310242]	307404	Q32KJ8
ENSRNOG00000047175	29.7973	6.63947	52.9551	7.9758	2.99563	0.0301509	0.399779	20	10438444	10442187	+	1171	Cryaa	GO:0001666;GO:0001934;GO:0002088;GO:0002089;GO:0005198;GO:0005212;GO:0005212;GO:0005212;GO:0005212;GO:0005515;GO:0005634;GO:0005634;GO:0005737;GO:0005737;GO:0006457;GO:0006915;GO:0007005;GO:0007015;GO:0007017;GO:0007021;GO:0007601;GO:0010259;GO:0010288;GO:0010629;GO:0030307;GO:0032387;GO:0032991;GO:0042493;GO:0042542;GO:0042802;GO:0043010;GO:0043066;GO:0043154;GO:0046872;GO:0048596;GO:0050821;GO:…	K09541	-	O	1919I;13M07;0DMR4;1CWKQ;1AV2X;0A057;KOG3591;0VB1H;0UQYN	crystallin, alpha A [Source:RGD Symbol;Acc:2413]	24273	P24623
ENSRNOG00000014336	53.5721	11.9513	95.193	7.9651	2.99369	0.00639078	0.193871	19	14523554	14561278	+	3163	Mcm5	GO:0003677;GO:0003688;GO:0005524;GO:0005634;GO:0005654;GO:0006260;GO:0006270;GO:0032508;GO:0042555;GO:0042555;GO:0000166;GO:0000727;GO:0003677;GO:0003677;GO:0003677;GO:0003678;GO:0003688;GO:0003688;GO:0003688;GO:0003697;GO:0004386;GO:0005524;GO:0005524;GO:0005524;GO:0005634;GO:0005634;GO:0005634;GO:0006260;GO:0006260;GO:0006267;GO:0006270;GO:0006270;GO:0006270;GO:0007049;GO:0016887;GO:0017116;GO:…	K02209	EC:3.6.4.12	L	KOG0481	minichromosome maintenance complex component 5 [Source:RGD Symbol;Acc:1306616]	291885	E9PTS4
ENSRNOG00000010797	56.3875	12.6896	100.085	7.8872	2.97951	0.00980501	0.24723	2	45104305	45113131	+	2173	Esm1	GO:0001525;GO:0002040;GO:0005171;GO:0005178;GO:0005520;GO:0005576;GO:0008284;GO:1902204;	K25036	-	W;T	13JHJ;0DNDK;0A0SG;KOG1218;0VBNR;1CTPQ;192PU;0URQM;1B2D6	endothelial cell-specific molecule 1 [Source:RGD Symbol;Acc:71013]	64536	P97682
ENSRNOG00000012843	143.014	32.4392	253.588	7.81732	2.96667	0.00128204	0.086124	6	136682126	136701628	+	2632	Aspg	GO:0004067;GO:0004067;GO:0004067;GO:0005515;GO:0006520;GO:0006520;	K13278	-	E	1B1B9;KOG0503;12RED;0DNMW;192F6;0UHG2;1CXJ7;09YS9;0V9Q4	asparaginase [Source:RGD Symbol;Acc:708388]	246266	O88202
ENSRNOG00000057451	298.367	67.873	528.861	7.79192	2.96198	0.00691539	0.202729	7	144970444	144993652	-	4395	Itga5	GO:0005154;GO:0005178;GO:0005178;GO:0005615;GO:0005737;GO:0005783;GO:0005783;GO:0005794;GO:0005794;GO:0005886;GO:0005886;GO:0005911;GO:0005925;GO:0007044;GO:0007044;GO:0007155;GO:0007155;GO:0007155;GO:0007155;GO:0007157;GO:0007157;GO:0007159;GO:0007159;GO:0007229;GO:0007229;GO:0007565;GO:0007613;GO:0007613;GO:0008305;GO:0008305;GO:0008305;GO:0009897;GO:0009897;GO:0009986;GO:0009986;GO:0010811;GO:…	K06484	-	-	-	integrin subunit alpha 5 [Source:RGD Symbol;Acc:2925]	315346	A0A0G2K1E2
ENSRNOG00000011794	8.03205	1.89332	14.1708	7.48464	2.90393	0.0158364	0.301887	5	154598758	154634686	+	1222	Tcea3	GO:0003674;GO:0003676;GO:0003676;GO:0003746;GO:0005575;GO:0005634;GO:0005634;GO:0005634;GO:0005634;GO:0005634;GO:0006351;GO:0006351;GO:0006355;GO:0006355;GO:0006414;GO:0008150;GO:0008270;GO:0008270;GO:0046872;	K03145	-	K	1AXM7;KOG1105;12TUW;18XGR;0A1K3;0DJWN;1CUQ1;0UNRW;0VCEQ	transcription elongation factor A3 [Source:RGD Symbol;Acc:1311369]	298559	Q5BK74
ENSRNOG00000000855	6.76012	1.61246	11.9078	7.38484	2.88457	0.0255184	0.375859	20	5176016	5179263	-	490	Lst1	GO:0000902;GO:0000902;GO:0003674;GO:0005575;GO:0005737;GO:0006955;GO:0006955;GO:0008150;GO:0016020;GO:0016020;GO:0016020;GO:0016021;GO:0016021;GO:0016021;GO:0016358;GO:0016358;GO:0050672;GO:0000902;GO:0006955;GO:0016020;	-	-	U	0VP09;1D62D;0JN3N;0UX0T;14CJR;0ABH8;1B8EU;0DWUJ	leukocyte specific transcript 1 [Source:RGD Symbol;Acc:620077]	64569	Q6MG46
ENSRNOG00000015160	167.638	40.405	294.871	7.29789	2.86748	0.0136165	0.285759	5	25349928	25353661	+	1626	Gem	GO:0000278;GO:0000287;GO:0003924;GO:0003924;GO:0005525;GO:0005525;GO:0007165;GO:0009898;GO:0016020;GO:0019003;GO:0030496;GO:0051233;GO:0051276;GO:0051310;GO:0072686;	K07846	-	S;J	0V6AT;09VBH;12RPT;KOG0395;0DGJZ	GTP binding protein overexpressed in skeletal muscle [Source:RGD Symbol;Acc:1307386]	297902	B5DFA6
ENSRNOG00000054251	35.7829	8.63141	62.9344	7.29133	2.86618	0.0080942	0.221133	4	163216163	163227334	-	2518	Clec7a	GO:0001872;GO:0001872;GO:0001872;GO:0001872;GO:0001872;GO:0002366;GO:0002720;GO:0002732;GO:0005737;GO:0005737;GO:0006910;GO:0006910;GO:0006910;GO:0008037;GO:0008037;GO:0008284;GO:0008284;GO:0008284;GO:0009986;GO:0009986;GO:0009986;GO:0010628;GO:0010628;GO:0016020;GO:0016021;GO:0016046;GO:0016046;GO:0016046;GO:0030246;GO:0030246;GO:0030246;GO:0030335;GO:0030335;GO:0030335;GO:0031334;GO:0031334;GO:…	K10074	-	-	-	C-type lectin domain containing 7A [Source:RGD Symbol;Acc:1565140]	502902	B5BUZ1;B2RYG9
ENSRNOG00000007544	14.4059	3.59321	25.2186	7.01842	2.81115	0.0340421	0.424967	4	98203958	98305173	-	1875	Il23r	GO:0002230;GO:0002230;GO:0002827;GO:0002827;GO:0003674;GO:0004896;GO:0005143;GO:0005143;GO:0005143;GO:0005515;GO:0005575;GO:0008150;GO:0009897;GO:0016020;GO:0016021;GO:0019221;GO:0019955;GO:0032496;GO:0032496;GO:0032693;GO:0032693;GO:0032729;GO:0032729;GO:0032735;GO:0032735;GO:0034341;GO:0034341;GO:0038155;GO:0042019;GO:0042019;GO:0042019;GO:0042020;GO:0042020;GO:0043235;GO:0043235;GO:0043235;GO:…	K05065	-	T	18VCN;0V4H3;0UFWH;0DEUW;0IHH9;13KA8;09TI5;1AYN2;1CPIN	interleukin 23 receptor [Source:RGD Symbol;Acc:1586368]	689932	-
ENSRNOG00000020599	13.8051	3.45004	24.1601	7.00287	2.80795	0.00294793	0.13259	16	21273387	21274688	-	1302	Tssk6	GO:0000166;GO:0000287;GO:0000287;GO:0000287;GO:0004672;GO:0004672;GO:0004674;GO:0004674;GO:0004674;GO:0004674;GO:0004674;GO:0004674;GO:0004674;GO:0005524;GO:0005524;GO:0005524;GO:0005524;GO:0005524;GO:0005634;GO:0005737;GO:0006468;GO:0006468;GO:0006468;GO:0006468;GO:0006468;GO:0016301;GO:0016310;GO:0018105;GO:0018105;GO:0035092;GO:0035092;GO:0035556;GO:0044877;GO:0044877;	K08811	EC:2.7.11.1	T	0UGF4;0DF87;KOG0583;190VB;12RJ4;1CPXU;1B0BS;0V4VX;09TY3	testis-specific serine kinase 6 [Source:RGD Symbol;Acc:1559764]	290670	D3ZEK4
ENSRNOG00000022256	23.1517	5.79524	40.5083	6.98992	2.80527	0.000138485	0.0280125	14	17210733	17212930	+	1134	Cxcl10	GO:0002690;GO:0005125;GO:0005125;GO:0005576;GO:0005576;GO:0005576;GO:0005576;GO:0005576;GO:0005615;GO:0005615;GO:0005615;GO:0006935;GO:0006935;GO:0006935;GO:0006935;GO:0006935;GO:0006952;GO:0006952;GO:0006954;GO:0006954;GO:0006955;GO:0006955;GO:0006955;GO:0007186;GO:0007186;GO:0007186;GO:0007189;GO:0007189;GO:0007189;GO:0008009;GO:0008009;GO:0008009;GO:0008009;GO:0008009;GO:0008201;GO:0008201;GO:…	K12671	-	W	13VPQ;1B6SH;1D56C;193TZ;0DVW2;0A9VR;0VKR5;0UWIU;0J1VC	C-X-C motif chemokine ligand 10 [Source:RGD Symbol;Acc:620209]	245920	P48973
ENSRNOG00000002905	52.1493	13.0765	91.2222	6.97606	2.80241	3.08829e-07	0.00023426	10	90984227	90987823	+	1152	Ccdc103	GO:0001947;GO:0001947;GO:0003341;GO:0003341;GO:0003351;GO:0005576;GO:0005737;GO:0005929;GO:0007368;GO:0030030;GO:0031514;GO:0036157;GO:0036157;GO:0036158;GO:0036158;GO:0036159;GO:0036159;GO:0036159;GO:0042803;GO:0042803;GO:0042995;GO:0070286;GO:0070286;GO:0070286;GO:0070286;GO:0071907;GO:0071907;GO:0001947;GO:0003341;GO:0003351;GO:0005576;GO:0005737;GO:0005929;GO:0007368;GO:0030030;GO:0031514;GO:…	K23731	-	S	0VEHF;18VCV;0INY9;1CYQ0;0DI91;1B48Z;13M61;0A3NM;0UFIY	coiled-coil domain containing 103 [Source:RGD Symbol;Acc:1562370]	498006	D3Z8H9
ENSRNOG00000050869	448.438	112.513	784.364	6.97133	2.80143	0.000169818	0.0319832	11	89008008	89009146	+	1139	Cebpd	GO:0000976;GO:0000976;GO:0000978;GO:0000978;GO:0000978;GO:0000978;GO:0000981;GO:0001228;GO:0001228;GO:0001228;GO:0002244;GO:0002244;GO:0003677;GO:0003677;GO:0003677;GO:0003700;GO:0003700;GO:0005634;GO:0005634;GO:0005634;GO:0006355;GO:0006355;GO:0006357;GO:0006357;GO:0006357;GO:0042802;GO:0042802;GO:0043565;GO:0045444;GO:0045444;GO:0045595;GO:0045669;GO:0045669;GO:0045892;GO:0045892;GO:0045944;GO:…	K10050	-	K	1DG2D;0WIKP;13FF6;0E96M;0ISXQ;0B5XT;0V3NH	CCAAT/enhancer binding protein delta [Source:RGD Symbol;Acc:2328]	25695	Q03484
ENSRNOG00000009342	8.79991	2.26338	15.3364	6.77589	2.76041	0.0135413	0.28478	3	6617751	6626284	-	1283	Fcnb	GO:0001664;GO:0001664;GO:0001867;GO:0001867;GO:0002376;GO:0002752;GO:0002752;GO:0003823;GO:0005102;GO:0005576;GO:0005581;GO:0005615;GO:0007186;GO:0007186;GO:0030246;GO:0031232;GO:0031232;GO:0032757;GO:0032757;GO:0033691;GO:0033691;GO:0033691;GO:0034394;GO:0034394;GO:0038187;GO:0038187;GO:0043654;GO:0043654;GO:0045087;GO:0046597;GO:0046597;GO:0046872;GO:0062023;GO:0097367;GO:0097367;GO:0097367;	K10104	-	S;W;E	0VABZ;09VSV;0DKX5;18URF;1B3UZ;0UPZC;KOG2579;1CVSE;13HWF	ficolin B [Source:RGD Symbol;Acc:621222]	114091	P57756
ENSRNOG00000023257	631.258	162.604	1099.91	6.76436	2.75795	0.00737827	0.208898	4	124660262	124858250	-	7965	Adamts9	GO:0003179;GO:0003229;GO:0004175;GO:0004175;GO:0004222;GO:0004222;GO:0004222;GO:0005576;GO:0005615;GO:0005615;GO:0005783;GO:0006508;GO:0006508;GO:0006508;GO:0006508;GO:0006508;GO:0006508;GO:0007229;GO:0008233;GO:0008237;GO:0008237;GO:0008237;GO:0008237;GO:0008237;GO:0008270;GO:0008270;GO:0009617;GO:0009617;GO:0009986;GO:0009986;GO:0010596;GO:0016787;GO:0030198;GO:0030198;GO:0031012;GO:0031012;GO:…	K08624	EC:3.4.24.-	O	18WC0;0V69U;1CU9C;0DJGU;1AZQ6;12PII;09U5N;0UIUN;KOG3538	ADAM metallopeptidase with thrombospondin type 1 motif, 9 [Source:RGD Symbol;Acc:1306889]	312566	D3ZMB0
ENSRNOG00000031743	358.969	92.6793	625.26	6.74648	2.75414	0.00301158	0.134377	2	248276709	248293784	+	2481	Gbp2	GO:0003924;GO:0003924;GO:0005525;GO:0005525;GO:0005634;GO:0005654;GO:0005737;GO:0005794;GO:0005829;GO:0009617;GO:0020005;GO:0031410;GO:0034504;GO:0035458;GO:0042802;GO:0042803;GO:0042832;GO:0044406;GO:0048471;GO:0050830;GO:0071222;GO:0071346;GO:0071346;GO:0071347;GO:0071356;	K20897	-	S;O;T;D;C;K	1AVYD;0UI2K;0V9BC;134KU;09XSJ;KOG2037;1CUKV;0DJTQ;194H1	guanylate binding protein 2 [Source:RGD Symbol;Acc:621810]	171164	Q63663;Q5PQW8
ENSRNOG00000036677	113.665	29.4392	197.892	6.72204	2.7489	0.0185676	0.325648	10	110138586	110148358	+	2145	Slc16a3	GO:0005887;GO:0005887;GO:0008028;GO:0008028;GO:0015129;GO:0015129;GO:0015293;GO:0015718;GO:0015718;GO:0016020;GO:0016021;GO:0016021;GO:0016021;GO:0022857;GO:0022857;GO:0035873;GO:0055085;GO:0055085;GO:0005886;GO:0005887;GO:0005887;GO:0008028;GO:0008028;GO:0015129;GO:0015129;GO:0015293;GO:0015718;GO:0015718;GO:0016020;GO:0016021;GO:0016021;GO:0016021;GO:0016323;GO:0016324;GO:0016328;GO:0022857;GO:…	K08180	-	P;G	13E28;0DS39;0URI5;18Z2D;1CZJP;0VFFU;0A4KH;KOG2504;1B3FT	solute carrier family 16 member 3 [Source:RGD Symbol;Acc:620603]	80878	O35910;B4F761
ENSRNOG00000020465	119.32	30.9235	207.717	6.71713	2.74785	0.0204221	0.338871	15	34470796	34479741	-	2002	Ripk3	GO:0004672;GO:0004672;GO:0005524;GO:0005829;GO:0006468;GO:0010922;GO:0032147;GO:0032991;GO:0042802;GO:0044877;GO:0046777;GO:0051092;GO:0060545;GO:0070266;GO:0097527;GO:1990000;	K08847	EC:2.7.11.1	T	0V6A7;18SA7;13399;0UIDC;KOG0192;1CR97;1ATXG;09VAW;0DGJD	receptor-interacting serine-threonine kinase 3 [Source:RGD Symbol;Acc:628899]	246240	Q9Z2P5
ENSRNOG00000014269	13.3209	3.46123	23.1805	6.69718	2.74355	0.0241021	0.366566	9	81427730	81434102	+	1319	Cxcr2	GO:0002438;GO:0002690;GO:0003674;GO:0004918;GO:0004918;GO:0004930;GO:0004930;GO:0004930;GO:0004930;GO:0004930;GO:0004950;GO:0004950;GO:0005575;GO:0005654;GO:0005886;GO:0005886;GO:0006935;GO:0006935;GO:0006935;GO:0006935;GO:0006935;GO:0006955;GO:0006968;GO:0006968;GO:0007165;GO:0007166;GO:0007166;GO:0007186;GO:0007186;GO:0007186;GO:0007200;GO:0007200;GO:0007204;GO:0007204;GO:0008284;GO:0008284;GO:…	K05050	-	T	1B0SH;0DFYU;0IEHI;0V5HB;09UP3;18S7S;1CQNA;12RGV;0UHHS	C-X-C motif chemokine receptor 2 [Source:RGD Symbol;Acc:2906]	29385	P35407
ENSRNOG00000014524	636.487	165.612	1107.36	6.68651	2.74125	2.14178e-05	0.00660866	17	13799383	13812704	-	3695	S1pr3	GO:0003376;GO:0004930;GO:0004930;GO:0004930;GO:0004930;GO:0005178;GO:0005178;GO:0005737;GO:0005886;GO:0005886;GO:0005886;GO:0005886;GO:0006954;GO:0006954;GO:0007165;GO:0007186;GO:0007186;GO:0007186;GO:0007189;GO:0007193;GO:0007193;GO:0007219;GO:0007219;GO:0016020;GO:0016021;GO:0016021;GO:0016021;GO:0019222;GO:0032651;GO:0032651;GO:0038036;GO:0038036;GO:1903141;GO:1903141;GO:0003376;GO:0004930;GO:…	K04290	-	T	13190;0DENT;1B52I;09TH0;0IIA7;1CPCM;0V4G0;18U1G;0UFVA	sphingosine-1-phosphate receptor 3 [Source:RGD Symbol;Acc:1583843]	306792	F1M9D3
ENSRNOG00000014532	256.442	66.9164	445.967	6.66454	2.73651	0.0389668	0.455558	3	154786215	154813464	+	2428	Lbp	GO:0001530;GO:0001530;GO:0001530;GO:0001530;GO:0002232;GO:0002281;GO:0002281;GO:0002376;GO:0005102;GO:0005576;GO:0005615;GO:0005615;GO:0005615;GO:0005615;GO:0006869;GO:0006953;GO:0006953;GO:0006953;GO:0006953;GO:0008289;GO:0008289;GO:0009986;GO:0009986;GO:0015920;GO:0031663;GO:0032490;GO:0032496;GO:0032496;GO:0032720;GO:0032722;GO:0032755;GO:0032757;GO:0032760;GO:0032760;GO:0033036;GO:0034145;GO:…	K05399	-	V	0DJ1E;09XPP;1CTSY;0V8MD;190JY;1B0NE;0UMQ6;13IC6;KOG4160	lipopolysaccharide binding protein [Source:RGD Symbol;Acc:61865]	29469	Q3MID7
ENSRNOG00000009912	109.902	28.69	191.114	6.66136	2.73582	0.00456365	0.165007	5	151172206	151199745	+	2628	Fgr	GO:0000166;GO:0001784;GO:0001784;GO:0001784;GO:0001784;GO:0001819;GO:0001819;GO:0001819;GO:0002376;GO:0004672;GO:0004672;GO:0004713;GO:0004713;GO:0004713;GO:0004713;GO:0004713;GO:0004713;GO:0004714;GO:0004715;GO:0004715;GO:0004715;GO:0004715;GO:0004715;GO:0005102;GO:0005515;GO:0005515;GO:0005524;GO:0005524;GO:0005524;GO:0005737;GO:0005739;GO:0005743;GO:0005758;GO:0005829;GO:0005829;GO:0005856;GO:…	K08891	EC:2.7.10.2	T	09UFI;1CY48;1B3P8;190WU;0DFI9;12R0Y;0UHW7;KOG0197;0V649	FGR proto-oncogene, Src family tyrosine kinase [Source:RGD Symbol;Acc:621319]	79113	Q6P6U0
ENSRNOG00000010626	126.213	32.9825	219.443	6.65331	2.73407	1.58679e-10	9.62918e-07	10	105498728	105504393	+	3779	Sphk1	GO:0003951;GO:0003951;GO:0016301;GO:0016301;GO:0016301;GO:0016310;GO:0003951;GO:0003951;GO:0016301;GO:0016301;GO:0016301;GO:0016310;GO:0003951;GO:0003951;GO:0016301;GO:0016301;GO:0016301;GO:0016310;GO:0000287;GO:0003677;GO:0003951;GO:0005516;GO:0005524;GO:0005737;GO:0005829;GO:0005886;GO:0005905;GO:0006670;GO:0008289;GO:0008481;GO:0010800;GO:0010803;GO:0016301;GO:0017050;GO:0019722;GO:0030100;GO:…	K04718	EC:2.7.1.91	T;I	0VCBZ;1AYDB;0A1GE;0DP44;1915T;1CY22;KOG1116;0UQ07;12RSX	sphingosine kinase 1 [Source:RGD Symbol;Acc:620048]	170897	Q91V26;A0A0G2JWE5
ENSRNOG00000024082	148.834	38.9392	258.728	6.6444	2.73214	3.27596e-11	2.98194e-07	8	58870516	58914603	+	2383	Gldn	GO:0005615;GO:0005886;GO:0009986;GO:0016020;GO:0016021;GO:0032528;GO:0034113;GO:0045162;GO:0045162;GO:0045162;GO:0086080;	K16364	-	W	0V0WW;196QV;1B9V9;0WCCH;0E5DV;0AZW3;0KCV6;14T0V;1DCDY	gliomedin [Source:RGD Symbol;Acc:727879]	315675	Q80WL1
ENSRNOG00000011824	666.682	174.739	1158.62	6.63058	2.72914	0.0297995	0.397971	4	124110716	124113242	-	1391	Trh	GO:0005179;GO:0005576;GO:0005576;GO:0005576;GO:0007628;GO:0008437;GO:0008437;GO:0009755;GO:0009755;GO:0009755;	K05253	-	W;T	0DTR1;1D38Z;13S1K;0IXZK;193WF;1B4Y5;0VHSY;0A6YT;0UV2Z	thyrotropin releasing hormone [Source:RGD Symbol;Acc:3903]	25569	P01150;B1WBP2
ENSRNOG00000000827	264.763	69.4077	460.118	6.62921	2.72884	0.0139066	0.28781	20	3438798	3440769	-	1282	Ier3	GO:0001562;GO:0003085;GO:0005634;GO:0005634;GO:0005634;GO:0005739;GO:0006282;GO:0007095;GO:0008630;GO:0043066;GO:0043066;GO:0045732;GO:0045820;GO:0046822;GO:0050728;GO:1901029;GO:2000377;GO:2001020;GO:2001020;GO:2001020;GO:0001562;GO:0003085;GO:0005634;GO:0005634;GO:0005739;GO:0006282;GO:0007095;GO:0008630;GO:0043066;GO:0043066;GO:0045732;GO:0045820;GO:0046822;GO:0050728;GO:1901029;GO:2000377;GO:…	-	-	T	193E8;1B64Q;1D39H;0UVQY;0IZ8Q;0A7TH;13SZD;0DUQT;0VI7A	immediate early response 3 [Source:RGD Symbol;Acc:1303321]	294235	Q6MG18;Q499N0
ENSRNOG00000008736	52.4368	13.8112	91.0623	6.59336	2.72101	4.49936e-07	0.000303373	13	90967739	90977734	-	2526	Slamf8	GO:0002232;GO:0002336;GO:0010760;GO:0016020;GO:0016021;GO:0033860;GO:0035690;GO:0038023;GO:0042742;GO:0042802;GO:0043549;GO:0045577;GO:0060266;GO:0090027;GO:0090383;GO:1902623;GO:2000509;	K16853	-	S;T	0IVMT;0VFS6;1B38D;18Z8N;12QUS;1D1MY;0DSCJ;0US0C;0A4VK	SLAM family member 8 [Source:RGD Symbol;Acc:1306263]	289237	D3ZS24
ENSRNOG00000008586	27.7048	7.3148	48.0947	6.57499	2.71699	0.00402239	0.156469	7	26375866	26425108	+	2769	Aldh1l2	GO:0003824;GO:0003824;GO:0004029;GO:0005654;GO:0005737;GO:0005737;GO:0005739;GO:0006730;GO:0006730;GO:0006730;GO:0009058;GO:0009058;GO:0009258;GO:0009258;GO:0009258;GO:0016020;GO:0016021;GO:0016155;GO:0016155;GO:0016155;GO:0016155;GO:0016155;GO:0016491;GO:0016491;GO:0016491;GO:0016620;GO:0016620;GO:0016742;GO:0016742;GO:0055114;	K00289	EC:1.5.1.6	F	KOG2452	aldehyde dehydrogenase 1 family, member L2 [Source:RGD Symbol;Acc:1309458]	299699	-
ENSRNOG00000048186	10.2742	2.73957	17.8089	6.50063	2.70058	0.0378302	0.449213	16	18814622	18819833	-	4912	F2rl3	GO:0004930;GO:0004930;GO:0004930;GO:0005886;GO:0007165;GO:0007186;GO:0007186;GO:0007186;GO:0007596;GO:0007596;GO:0015057;GO:0015057;GO:0016020;GO:0016021;GO:0016021;GO:0016021;GO:0051281;GO:0070493;GO:0070493;	K04236	-	T	09YIV;1CUT2;0V9GK;1ARYW;0UNVE;13BWW;0IFSN;0DJZ7	F2R like thrombin or trypsin receptor 3 [Source:RGD Symbol;Acc:620872]	116498	Q920E0
ENSRNOG00000004575	19.8993	5.32846	34.4701	6.46905	2.69355	0.0207728	0.342145	3	121825412	121836086	-	1272	Il1a	GO:0005125;GO:0005149;GO:0005576;GO:0005615;GO:0006954;GO:0006955;GO:0005125;GO:0005149;GO:0005576;GO:0005615;GO:0006954;GO:0006955;GO:0001819;GO:0002248;GO:0005125;GO:0005125;GO:0005125;GO:0005149;GO:0005507;GO:0005576;GO:0005615;GO:0005615;GO:0005615;GO:0005829;GO:0006883;GO:0006954;GO:0006955;GO:0008285;GO:0010575;GO:0010628;GO:0019221;GO:0032743;GO:0034605;GO:0035234;GO:0045766;GO:0045840;GO:…	K04383	-	W;T	1AWYQ;0UFPI;0JAAI;0DHQC;142BS;192YM;0V7DF;09WEY;1CSEP	interleukin 1 alpha [Source:RGD Symbol;Acc:2890]	24493	P16598
ENSRNOG00000004500	273.497	73.5564	473.438	6.43639	2.68625	3.4741e-05	0.00943971	7	102586313	102591240	+	2691	Myc	GO:0003700;GO:0005654;GO:0006355;GO:0046983;GO:0003700;GO:0003700;GO:0006355;GO:0006355;	-	-	K	0VABW;18XVH;09ZEU;12RYD;1AWEN;0DKX3;0UKYJ;1CVSB;0IFSM	MYC proto-oncogene, bHLH transcription factor [Source:RGD Symbol;Acc:3130]	-	-
ENSRNOG00000009311	53.2762	14.3617	92.1907	6.41919	2.68239	7.6513e-05	0.0169868	7	12804919	12810570	-	1897	Fstl3	GO:0001503;GO:0001822;GO:0001968;GO:0001968;GO:0002244;GO:0002244;GO:0005515;GO:0005576;GO:0005615;GO:0005615;GO:0005615;GO:0005615;GO:0005634;GO:0005634;GO:0005634;GO:0005654;GO:0005794;GO:0006357;GO:0006357;GO:0007275;GO:0007283;GO:0008584;GO:0022409;GO:0022409;GO:0030141;GO:0030154;GO:0030324;GO:0030325;GO:0030510;GO:0030514;GO:0030514;GO:0030514;GO:0032926;GO:0032926;GO:0032926;GO:0044306;GO:…	K23913	-	O;W;K	136BB;1CVYX;KOG3649;09ZKB;18TG0;0VAH4;0UGUG;1B0AW;0DM3V	follistatin like 3 [Source:RGD Symbol;Acc:621811]	114031	Q99PW7
ENSRNOG00000033433	394.378	107.354	681.403	6.34725	2.66613	0.0055891	0.182021	8	128659868	128672284	-	2970	Csrnp1	GO:0000981;GO:0001228;GO:0001228;GO:0003700;GO:0003700;GO:0005634;GO:0005634;GO:0005634;GO:0005634;GO:0006355;GO:0006355;GO:0006357;GO:0009791;GO:0009791;GO:0043565;GO:0043565;GO:0043565;GO:0045944;GO:0045944;GO:0048008;GO:0048008;GO:0048705;GO:0048705;GO:0060021;GO:0060021;GO:0060325;GO:0060325;GO:0000981;GO:0001228;GO:0003700;GO:0005634;GO:0005634;GO:0005634;GO:0006355;GO:0006357;GO:0009791;GO:…	K17494	-	K	1CYEK;18ZTQ;0VDSM;0A2XC;1AX0C;13J1M;0UPGF;KOG3813;0DMCF	cysteine and serine rich nuclear protein 1 [Source:RGD Symbol;Acc:1305999]	363165	D4AAK3
ENSRNOG00000010181	22.1066	6.02024	38.193	6.3441	2.66542	0.00558441	0.182021	4	156253079	156264769	+	3352	Clec4d	GO:0002250;GO:0002292;GO:0005886;GO:0016020;GO:0016021;GO:0030887;GO:0034987;GO:0038094;GO:0042742;GO:0045087;	K10058	-	T;V	0UJ1X;1CW80;13PCP;1B09X;KOG4297;0VAQR;0DMCT;1930B;09ZUB	C-type lectin domain family 4, member D [Source:RGD Symbol;Acc:1303339]	362432	Q69FH1
ENSRNOG00000048636	10.3383	2.8177	17.8589	6.33813	2.66406	0.0487924	0.499868	7	119701251	119716238	-	2716	Il2rb	GO:0004896;GO:0004896;GO:0004911;GO:0005515;GO:0005886;GO:0005886;GO:0009897;GO:0009986;GO:0009986;GO:0016020;GO:0016020;GO:0016020;GO:0016021;GO:0019221;GO:0019976;GO:0019976;GO:0035723;GO:0038110;GO:0042010;GO:0043066;GO:0050766;GO:0004896;GO:0005515;GO:0016020;	K05069	-	W	13K4W;1CWES;0UKJQ;0DS3K;1AW23;0II5H;0A4KT;18X7W;0VFG4	interleukin 2 receptor subunit beta [Source:RGD Symbol;Acc:2896]	25746	P26896
ENSRNOG00000019822	476.02	131.009	821.032	6.26699	2.64777	1.61475e-09	4.19951e-06	7	11646269	11648322	-	1300	Gadd45b	GO:0000185;GO:0000185;GO:0000185;GO:0000186;GO:0000186;GO:0005634;GO:0005634;GO:0005634;GO:0005634;GO:0005634;GO:0005737;GO:0005737;GO:0005737;GO:0006469;GO:0006469;GO:0043065;GO:0043065;GO:0046330;GO:0046330;GO:0051726;GO:0051726;GO:0051726;GO:0051726;GO:0051726;GO:1900745;GO:1900745;	K04402	-	T;D	09Y9G;0IH6M;1B4GI;0UNF1;13P0G;0DJNU;0V96X;18ZHH;1CUFR	growth arrest and DNA-damage-inducible, beta [Source:RGD Symbol;Acc:1309080]	299626	Q5U3Z2
ENSRNOG00000020679	292.346	80.7707	503.922	6.23891	2.64129	0.0100699	0.249457	8	22035256	22047059	+	2643	Icam1	GO:0002291;GO:0002693;GO:0005178;GO:0005615;GO:0007155;GO:0007159;GO:0016020;GO:0022614;GO:0044406;GO:0046813;GO:0050900;GO:0061028;GO:0070062;GO:0070374;GO:0098609;GO:1902042;GO:1904646;GO:2000352;	K06490	-	T;W	1B090;13NCQ;0IPHM;0DMAY;1CR6B;0UIWP;09W69;195US;0VAP3	intercellular adhesion molecule 1 [Source:RGD Symbol;Acc:2857]	25464	Q00238
ENSRNOG00000024390	17.7725	4.9266	30.6184	6.2149	2.63573	0.0277204	0.389992	14	84465515	84470409	+	2764	Osm	GO:0005125;GO:0005147;GO:0005576;GO:0006955;GO:0038165;	K05418	-	W;T	1D30N;0UUCJ;1B51D;193TP;0IWR2;0VEQ7;13QHM;0DTNW;0A6P8	oncostatin M [Source:RGD Symbol;Acc:1585012]	289747	Q65Z15
ENSRNOG00000010645	395.445	110.437	680.453	6.16148	2.62328	3.29736e-06	0.00139601	15	24141651	24165537	+	1086	Lgals3	GO:0001772;GO:0002376;GO:0002548;GO:0005576;GO:0005634;GO:0005634;GO:0005681;GO:0005737;GO:0005737;GO:0005743;GO:0008380;GO:0019863;GO:0019863;GO:0019903;GO:0030246;GO:0030246;GO:0030246;GO:0030593;GO:0030855;GO:0031334;GO:0042056;GO:0042129;GO:0043236;GO:0045087;GO:0045806;GO:0048245;GO:0048246;GO:0050918;GO:0070232;GO:0071674;GO:0071677;GO:0090280;GO:1902041;GO:1903078;GO:2001237;GO:0002376;GO:…	K06831	-	W	1D159;0A4D8;192VW;0UGPC;0VF81;1ASDY;13MYU;KOG3587;0DF7M	galectin 3 [Source:RGD Symbol;Acc:69356]	83781	P08699
ENSRNOG00000011647	113.177	31.805	194.549	6.11694	2.61281	0.0382513	0.451892	2	190007216	190008511	+	472	S100a6	GO:0001726;GO:0005509;GO:0005509;GO:0005509;GO:0005509;GO:0005523;GO:0005634;GO:0005635;GO:0005635;GO:0005737;GO:0005829;GO:0005886;GO:0008270;GO:0031234;GO:0042803;GO:0044548;GO:0046872;GO:0048306;GO:0048471;	K23764	-	S;T;P	1D4FG;0UVZ0;0A90H;1B6CH;0IYT5;0DV50;0VJX4;193VX;13U3B	S100 calcium binding protein A6 [Source:RGD Symbol;Acc:620264]	85247	P05964;B2GVB1
ENSRNOG00000018257	56.3665	15.8459	96.8871	6.11433	2.61219	0.0413954	0.468044	1	170423483	170431073	-	1566	Hpx	GO:0002639;GO:0002925;GO:0005615;GO:0006879;GO:0015232;GO:0015886;GO:0020027;GO:0042168;GO:0042531;GO:0051246;GO:0060332;GO:0060335;	K18977	-	O;W	KOG1565;1ASJG;0VD40;1CX90;0DNBW;1361K;0UNQB;0A283;194W3	hemopexin [Source:RGD Symbol;Acc:62040]	58917	P20059
ENSRNOG00000012208	8.68927	2.44383	14.9347	6.1112	2.61146	0.0233378	0.361242	7	143820900	143837780	-	2692	Itgb7	GO:0003366;GO:0003366;GO:0005178;GO:0005925;GO:0007155;GO:0007155;GO:0007155;GO:0007160;GO:0007160;GO:0007160;GO:0007160;GO:0007160;GO:0007229;GO:0007229;GO:0007229;GO:0007229;GO:0007229;GO:0007229;GO:0008305;GO:0008305;GO:0009986;GO:0009986;GO:0016020;GO:0016021;GO:0016477;GO:0033627;GO:0034113;GO:0034113;GO:0034446;GO:0034446;GO:0034669;GO:0034669;GO:0038023;GO:0038023;GO:0043113;GO:0043113;GO:…	K06590	-	W	0DG9T;1CUIS;0V602;1AWM0;09V0A;192FG;12SZY;KOG1226;0USK4	integrin subunit beta 7 [Source:RGD Symbol;Acc:2929]	25713	G3V7M2
ENSRNOG00000006940	75.9596	21.4253	130.494	6.09064	2.60659	1.20715e-06	0.000627893	7	119482272	119499425	+	1496	Ncf4	GO:0005515;GO:0005737;GO:0005737;GO:0005737;GO:0005829;GO:0006801;GO:0006909;GO:0006909;GO:0010008;GO:0010008;GO:0016020;GO:0016020;GO:0016175;GO:0016175;GO:0016176;GO:0016176;GO:0016176;GO:0016176;GO:0016176;GO:0032266;GO:0032266;GO:0035091;GO:0035091;GO:0042554;GO:0043020;GO:0043020;GO:0043020;GO:0043020;GO:0043020;GO:0045730;GO:0045730;GO:0060090;	K08012	-	C	197B1;0B580;0WHUJ;1DFP4;0E8S1;0V3EH;0IRR2;1BB78;13EBX	neutrophil cytosolic factor 4 [Source:RGD Symbol;Acc:1593157]	500904	B2RZ98
ENSRNOG00000043451	504.832	142.434	867.23	6.08863	2.60612	1.70107e-07	0.00015484	14	6673686	6679901	-	1519	Spp1	GO:0001503;GO:0005178;GO:0005615;GO:0005794;GO:0006710;GO:0007155;GO:0007155;GO:0033280;GO:0045893;GO:0071394;GO:2000866;GO:0001503;GO:0007155;	K06250	-	W	1933G;1B1CS;13I3U;0IVP1;0UPAR;0DMXE;0VGDG;09UE0;1D2CJ	secreted phosphoprotein 1 [Source:RGD Symbol;Acc:3752]	25353	P08721
ENSRNOG00000010105	164.762	46.574	282.95	6.07527	2.60295	0.0449203	0.481749	2	193866951	193868502	+	297	S100a11	GO:0005509;GO:0042127;GO:0048306;	K23765	-	S;T	0VJIZ;1D4FF;0DV4Z;1B62M;0A8N8;193NU;13UIY;0UW37;0J1U7	S100 calcium binding protein A11 [Source:RGD Symbol;Acc:1303295]	445415	Q6B345
ENSRNOG00000026647	398.225	113.946	682.504	5.98969	2.58248	0.0059535	0.188166	10	57060007	57064600	-	1705	Cxcl16	GO:0005041;GO:0005041;GO:0005041;GO:0005041;GO:0005044;GO:0005044;GO:0005044;GO:0005044;GO:0005125;GO:0005615;GO:0005615;GO:0005615;GO:0006898;GO:0006898;GO:0006935;GO:0006935;GO:0006935;GO:0007165;GO:0008009;GO:0008009;GO:0008009;GO:0008009;GO:0010818;GO:0010818;GO:0016020;GO:0016021;GO:0016021;GO:0030307;GO:0030307;GO:0030307;GO:0030335;GO:0030335;GO:0030335;GO:0030335;GO:0034097;GO:0034097;GO:…	K10035	-	W;T	0A6MB;0UUCY;1D2YN;0VHFG;1B5DC;0J8A5;0DTM6;142Z2;193U1	C-X-C motif chemokine ligand 16 [Source:RGD Symbol;Acc:1562928]	497942	Q6AXU5;A0A6M4C4P9
ENSRNOG00000003880	12.3393	3.55783	21.1209	5.93644	2.5696	0.0108946	0.25758	7	58042281	58149061	-	2580	Tph2	GO:0004497;GO:0004510;GO:0004510;GO:0005506;GO:0009072;GO:0016714;GO:0042427;GO:0043005;GO:0055114;	K00502	EC:1.14.16.4	E	1CWMX;12SID;1AXU1;0V93G;KOG3820;194SS;09V2Z;0UMV7;0DMSC	tryptophan hydroxylase 2 [Source:RGD Symbol;Acc:631332]	317675	Q8CGU9
ENSRNOG00000011130	38.4187	11.1013	65.7362	5.92148	2.56596	0.016141	0.30507	1	184184020	184188911	-	1306	Calca	GO:0005179;GO:0005179;GO:0005179;GO:0005576;GO:0005576;GO:0005576;GO:0007165;GO:0001984;GO:0002027;GO:0002548;GO:0002548;GO:0005102;GO:0005102;GO:0005179;GO:0005179;GO:0005179;GO:0005184;GO:0005576;GO:0005576;GO:0005576;GO:0005576;GO:0005576;GO:0005615;GO:0005615;GO:0005615;GO:0005615;GO:0005634;GO:0005737;GO:0005737;GO:0006874;GO:0006874;GO:0006954;GO:0006954;GO:0007189;GO:0007189;GO:0007189;GO:…	K12332	-	W;T	1D3YE;0A7NU;0UVNJ;13R3K;1B63W;0VIBJ;0IX7S;0DUM3;193FJ	calcitonin-related polypeptide alpha [Source:RGD Symbol;Acc:2254]	24241	P01256;A0A0G2JSX2
ENSRNOG00000017539	127.43	36.8491	218.01	5.91629	2.56469	0.0387038	0.455477	3	161413298	161421520	+	3150	Mmp9	GO:0001501;GO:0001503;GO:0001503;GO:0001934;GO:0004175;GO:0004222;GO:0004222;GO:0004222;GO:0004222;GO:0004222;GO:0005576;GO:0005615;GO:0006508;GO:0006508;GO:0006508;GO:0006508;GO:0007566;GO:0008233;GO:0008233;GO:0008233;GO:0008237;GO:0008237;GO:0008237;GO:0008237;GO:0008270;GO:0008270;GO:0016787;GO:0030198;GO:0030335;GO:0030574;GO:0030574;GO:0030574;GO:0030574;GO:0031012;GO:0031012;GO:0034614;GO:…	K01403	EC:3.4.24.35	O;W	KOG1565;09X7C;0DIIT;0V85Z;18VMD;1CTTY;13B8S;0UR0H;1AWCZ	matrix metallopeptidase 9 [Source:RGD Symbol;Acc:621320]	81687	P50282
ENSRNOG00000043486	55.8623	16.1993	95.5253	5.89688	2.55995	0.0234646	0.361839	1	216808632	216828651	-	2441	Tnfrsf26	GO:0005515;GO:0005515;GO:0005886;GO:0009986;GO:0016020;GO:0016021;GO:0036462;GO:0043065;	K05161	-	T	196G5;1B8BX;1D5QS;0DWCJ;1482D;0AAZX;0VN00;0JFKD;0UWVH	tumor necrosis factor receptor superfamily, member 26 [Source:RGD Symbol;Acc:1309693]	361685	D4A5X9
ENSRNOG00000005615	499.85	145.612	854.087	5.86549	2.55225	0.000483733	0.0533719	4	97782512	97784842	-	1241	Gadd45a	GO:0000122;GO:0000185;GO:0005634;GO:0005634;GO:0005634;GO:0005634;GO:0005737;GO:0006469;GO:0007098;GO:0016525;GO:0016607;GO:0019900;GO:0033140;GO:0033140;GO:0042770;GO:0042803;GO:0043065;GO:0043537;GO:0043537;GO:0046330;GO:0046982;GO:0047485;GO:0051726;GO:0051726;GO:0051726;GO:0071260;GO:0071479;GO:0071850;GO:0071901;GO:1900745;GO:1990841;GO:2000379;	K04402	-	D;L	192I9;0V8X2;0UN20;12QUD;1AZ2H;0IFHI;1CU4I;0DJCA;09XZA	growth arrest and DNA-damage-inducible, alpha [Source:RGD Symbol;Acc:2654]	25112	Q66HL6
ENSRNOG00000008676	419.578	122.315	716.842	5.86064	2.55106	0.00142344	0.0918924	4	169147243	169181966	+	2805	Emp1	GO:0005886;GO:0008219;GO:0016020;GO:0016021;GO:0032060;GO:0016020;GO:0016021;	-	-	U	1D35G;0VHND;192Z7;0UV06;0DTTB;13PXT;0IW7W;1B5E1;0A6UE	epithelial membrane protein 1 [Source:RGD Symbol;Acc:2552]	25314	P54848
ENSRNOG00000014961	1027.02	300.606	1753.43	5.83298	2.54423	0.000100091	0.0209443	5	161947137	161981441	-	1852	Pdpn	GO:0016020;GO:0016021;	K16778	-	W;T	1B5SB;13XJM;19435;1D3DH;0A8GE;0UVAP;0J49G;0VJYA;0DTNQ	podoplanin [Source:RGD Symbol;Acc:61819]	54320	Q64294
ENSRNOG00000026607	9.83168	2.89572	16.7676	5.7905	2.53369	0.0250116	0.373894	13	79378733	79388498	+	2081	Tnfsf18	GO:0002309;GO:0002309;GO:0002309;GO:0002309;GO:0002309;GO:0002687;GO:0002687;GO:0005515;GO:0009986;GO:0009986;GO:0009986;GO:0010759;GO:0010759;GO:0016020;GO:0016021;GO:0032813;GO:0032813;GO:0032813;GO:0032813;GO:0032813;GO:0033209;GO:0033209;GO:0033209;GO:0033209;GO:0033209;GO:0042129;GO:0042129;GO:0042129;GO:0042531;GO:0042531;GO:0042802;GO:0042802;GO:0042802;GO:0043254;GO:0043254;GO:0045785;GO:…	K05479	-	T	0DSJ4;193XB;0A75V;1B4X2;0J65W;13S09;0UURV;0VHXR;1D14P	TNF superfamily member 18 [Source:RGD Symbol;Acc:1305066]	364031	-
ENSRNOG00000039496	145.402	43.1499	247.655	5.73941	2.5209	0.0129961	0.278933	X	15679254	15682652	+	1067	Plp2	GO:0005886;GO:0016020;GO:0019956;	-	-	V	KOG4788;1AYPN;13KCW;0UV1X;1D31I;1939B;0DTPT;0A2TR;0VFKT	proteolipid protein 2 [Source:RGD Symbol;Acc:1587363]	302562	Q6P742
ENSRNOG00000016756	32.3384	9.64131	55.0355	5.7083	2.51306	0.000214628	0.0350786	1	78833157	78837623	+	3443	Ptgir	GO:0004930;GO:0005829;GO:0005886;GO:0007186;GO:0007189;GO:0007189;GO:0010642;GO:0016021;GO:0032496;GO:0048662;GO:0048662;	K04263	-	T	KOG3656;0V9VD;18V5R;13HYN;1B15B;0UU8X;1CV6N;09YXQ;0DKCR	prostaglandin I2 receptor [Source:RGD Symbol;Acc:1310890]	292661	P43253
ENSRNOG00000058388	464.118	138.454	789.782	5.7043	2.51205	0.00418019	0.157232	1	85380088	85382569	+	1812	Zfp36	GO:0000122;GO:0000122;GO:0000165;GO:0000165;GO:0000288;GO:0000288;GO:0000289;GO:0000289;GO:0000932;GO:0003729;GO:0003729;GO:0005634;GO:0005634;GO:0005737;GO:0005737;GO:0005829;GO:0005829;GO:0006357;GO:0006402;GO:0009611;GO:0009611;GO:0010494;GO:0010837;GO:0019899;GO:0019901;GO:0019957;GO:0030014;GO:0031072;GO:0031086;GO:0032680;GO:0032703;GO:0032897;GO:0035278;GO:0035556;GO:0035925;GO:0035925;GO:…	K15308	-	-	-	zinc finger protein 36 [Source:RGD Symbol;Acc:620722]	79426	P47973;G3V8K6
ENSRNOG00000003925	9.67813	2.88833	16.4679	5.70154	2.51135	0.0171303	0.315936	13	111236466	111474411	-	1479	Hhat	GO:0003674;GO:0005575;GO:0005783;GO:0007224;GO:0007224;GO:0007224;GO:0007224;GO:0008150;GO:0016020;GO:0016021;GO:0016409;GO:0016409;GO:0016409;GO:0016409;GO:0016409;GO:0016746;GO:0018345;GO:0018345;GO:0018345;GO:0018345;GO:0018345;	K24678	EC:2.3.1.-	T	0V61U;1AYMR;0DGBJ;1CR0Z;18XJT;KOG3860;09V24;12PGB;0UI20	hedgehog acyltransferase [Source:RGD Symbol;Acc:1311746]	289344	-
ENSRNOG00000001607	1417.78	423.188	2412.36	5.70044	2.51107	0.017238	0.316324	11	25342126	25350974	-	4400	Adamts1	GO:0001542;GO:0001822;GO:0004222;GO:0004222;GO:0004222;GO:0004222;GO:0005576;GO:0005604;GO:0006508;GO:0006508;GO:0006508;GO:0007229;GO:0008201;GO:0008233;GO:0008237;GO:0008237;GO:0008237;GO:0008270;GO:0008270;GO:0016525;GO:0016787;GO:0031012;GO:0031012;GO:0031012;GO:0031410;GO:0046872;GO:0060347;GO:1900087;GO:1904707;GO:1904754;	K08617	EC:3.4.24.-	O	0V69U;0DHEM;0UK4M;1CSJ9;12PII;09U5N;191QF;1AZAR;KOG3538	ADAM metallopeptidase with thrombospondin type 1 motif, 1 [Source:RGD Symbol;Acc:621241]	79252	Q68EJ2
ENSRNOG00000055716	16.7616	5.02164	28.5016	5.67576	2.50481	0.00239097	0.120242	1	64182422	64188658	+	2029	Oscar	GO:0009986;GO:0009986;GO:0016020;GO:0016021;GO:0030316;GO:0030316;GO:0038064;GO:0038064;GO:0038065;GO:0038094;GO:0038094;GO:0045780;GO:0045780;GO:0072674;GO:0072674;	K14377	-	-	-	osteoclast associated Ig-like receptor [Source:RGD Symbol;Acc:1559897]	292537	D3ZCA1
ENSRNOG00000030118	2240.87	671.425	3810.32	5.67497	2.50461	0.0113323	0.262092	X	65226748	65295810	+	5110	Msn	GO:0001771;GO:0001931;GO:0003725;GO:0003779;GO:0003779;GO:0005102;GO:0005737;GO:0005856;GO:0005856;GO:0005856;GO:0005886;GO:0005886;GO:0005902;GO:0005902;GO:0005925;GO:0007159;GO:0008092;GO:0008092;GO:0008360;GO:0008361;GO:0009986;GO:0010628;GO:0016020;GO:0016323;GO:0016324;GO:0016324;GO:0019899;GO:0019901;GO:0022612;GO:0022614;GO:0030175;GO:0031143;GO:0042098;GO:0042995;GO:0045177;GO:0045177;GO:…	K05763	-	-	-	moesin [Source:RGD Symbol;Acc:621260]	81521	O35763
ENSRNOG00000004725	8.2283	2.4736	13.983	5.65289	2.49899	0.0305279	0.402543	7	142305338	142318620	-	1105	Cela1	GO:0000122;GO:0004252;GO:0004252;GO:0006508;GO:0006508;GO:0006508;GO:0006954;GO:0008233;GO:0008236;GO:0009791;GO:0016055;GO:0016787;GO:0031017;GO:0035264;GO:0042127;GO:0045595;GO:0045766;GO:0045944;GO:0048771;GO:0055123;GO:0060309;GO:0061113;	K01326	EC:3.4.21.36	O;B;E	0A1JA;0VCF0;13KGM;KOG3627;1CRGP;18V4S;1B1IS;0URKX;0DIS9	chymotrypsin like elastase 1 [Source:RGD Symbol;Acc:2547]	24331	P00773;A0A0G2JSI5
ENSRNOG00000027380	23.4079	7.03764	39.7782	5.6522	2.49881	0.0185124	0.325161	11	64522130	64553228	+	1852	Upk1b	GO:0009617;GO:0016020;GO:0016021;GO:0016021;GO:0016021;GO:0016324;GO:0030855;GO:0120001;	K17347	-	S;G	18S1Z;0A06Z;KOG3882;1AVBM;0DMT8;1CWNJ;0UR0I;13JSU;0VB2X	uroplakin 1B [Source:RGD Symbol;Acc:1307806]	303924	Q566D0
ENSRNOG00000061394	13.1262	3.97446	22.2779	5.60526	2.48678	0.0291275	0.393553	4	156270920	156276304	-	952	Clec4e	GO:0001819;GO:0002221;GO:0002292;GO:0005509;GO:0006955;GO:0016020;GO:0016020;GO:0016021;GO:0030246;GO:0038023;GO:0038094;GO:0038187;GO:0042742;GO:0045087;	K10059	-	-	-	C-type lectin domain family 4, member E [Source:RGD Symbol;Acc:1359298]	450223	Q67EQ1
ENSRNOG00000046848	53.9354	16.3555	91.5154	5.5954	2.48424	0.000658148	0.0614441	8	103459161	103484535	+	1541	PCOLCE2	GO:0005515;GO:0005518;GO:0008201;GO:0016504;GO:1990830;	K24361	-	O	0DI6V;0V7UK;1AUFA;09WWE;1CSX8;0IEMJ;18UKE;12Q5Y;0UIY8	procollagen C-endopeptidase enhancer 2 [Source:RGD Symbol;Acc:1595195]	684050	B1WBU3
ENSRNOG00000029682	485.428	147.399	823.457	5.58657	2.48196	0.00380511	0.153938	20	5040337	5049166	+	1172	Clic1	GO:0005244;GO:0005247;GO:0005254;GO:0005254;GO:0005254;GO:0005254;GO:0005254;GO:0005254;GO:0005515;GO:0005634;GO:0005634;GO:0005634;GO:0005634;GO:0005635;GO:0005635;GO:0005737;GO:0005737;GO:0005737;GO:0005739;GO:0005739;GO:0005886;GO:0006749;GO:0006749;GO:0006811;GO:0006821;GO:0006821;GO:0006821;GO:0006821;GO:0006821;GO:0016020;GO:0016021;GO:0031965;GO:0034220;GO:0034707;GO:0034765;GO:0045669;GO:…	K05021	-	P	13BMJ;0E7RC;1DERC;0WFZ7;0B3JN;1BARU;0V2TF;1972E;0INGZ	chloride intracellular channel 1 [Source:RGD Symbol;Acc:1303043]	406864	Q6MG61
ENSRNOG00000014426	733.991	224.374	1243.61	5.54256	2.47055	0.00759665	0.212112	18	47500330	47577819	-	4807	Lox	GO:0001568;GO:0001649;GO:0001932;GO:0004720;GO:0004720;GO:0005507;GO:0005518;GO:0005576;GO:0005581;GO:0005615;GO:0007507;GO:0010468;GO:0016202;GO:0016641;GO:0017015;GO:0018057;GO:0030199;GO:0030282;GO:0030324;GO:0031012;GO:0035791;GO:0035904;GO:0035905;GO:0035906;GO:0042981;GO:0043491;GO:0045652;GO:0046716;GO:0048251;GO:0048514;GO:0048747;GO:0055114;GO:0060326;GO:0061448;GO:0071310;GO:0071897;GO:…	K00277	EC:1.4.3.13	O;W	0DKQN;0VA5U;1CVJ5;13KN2;0IHTH;195CU;0UJBD;09Z8H;1AUUF	lysyl oxidase [Source:RGD Symbol;Acc:3015]	24914	P16636
ENSRNOG00000032240	108.83	33.3543	184.306	5.52571	2.46616	0.000593556	0.0583477	2	248178389	248197160	+	3108	Gbp5	GO:0003924;GO:0005525;GO:0005737;GO:0005794;GO:0009617;GO:0031410;GO:0032731;GO:0032731;GO:0032741;GO:0034067;GO:0042802;GO:0042803;GO:0045089;GO:0048471;GO:0051289;GO:0071346;GO:0071346;GO:1900017;GO:1900227;	K20898	-	S;K	0V5RR;0DG1U;09US8;18XUQ;1ASMB;KOG2037;1CQRC;0UHMY;13NFW	guanylate binding protein 5 [Source:RGD Symbol;Acc:1311040]	362050	B5DF73;F1M9F6
ENSRNOG00000020300	208.104	63.9262	352.281	5.51075	2.46225	0.00205769	0.110829	1	215628785	215662504	+	1234	Lsp1	GO:0003779;GO:0003779;GO:0006935;GO:0006935;GO:0006952;GO:0006952;GO:0007165;GO:0007165;GO:0098761;GO:0098761;	K14957	-	T	KOG3656;0VCRI;0A5RQ;1AZ9B;191HK;1D2A1;13MTQ;0UR8V;0DSFT	lymphocyte-specific protein 1 [Source:RGD Symbol;Acc:1306133]	361680	Q4QQV6
ENSRNOG00000030387	145.83	44.8378	246.822	5.50478	2.46069	0.0219321	0.351784	11	81421676	81444621	-	2632	Kng1	GO:0004866;GO:0004869;GO:0004869;GO:0004869;GO:0004869;GO:0005576;GO:0005576;GO:0005615;GO:0006953;GO:0007204;GO:0010466;GO:0010951;GO:0030195;GO:0030414;GO:0042311;GO:0004869;GO:0004869;GO:0004869;GO:0005102;GO:0005615;GO:0007162;GO:0007204;GO:0030195;GO:0045861;GO:0004869;GO:0004869;GO:0005615;GO:0006954;GO:0007596;GO:0007599;GO:0010951;GO:0042311;GO:0004869;	K03898	-	W	1D03I;0IKIQ;13N81;09YFS;0DQZ3;0VE6A	kininogen 1 [Source:RGD Symbol;Acc:1359376]	288001	P08932
ENSRNOG00000019142	59.1199	18.2227	100.017	5.48861	2.45644	0.00718514	0.205669	1	252589785	252624790	+	2553	Fas	GO:0004888;GO:0004888;GO:0005515;GO:0005516;GO:0005886;GO:0006915;GO:0006915;GO:0006915;GO:0006955;GO:0006955;GO:0007165;GO:0007165;GO:0016020;GO:0016020;GO:0016020;GO:0016021;GO:0045121;	K04390	-	T	1CTQE;09XME;1B0GF;0J23A;0DIYZ;0V8J4;13V7I;0UMMC;192Y5	Fas cell surface death receptor [Source:RGD Symbol;Acc:619831]	246097	Q63199;F1LWQ2
ENSRNOG00000058645	727.14	224.191	1230.09	5.48678	2.45596	3.86638e-09	7.82084e-06	5	79789671	79874671	-	7213	Tnc	GO:0003674;GO:0005515;GO:0005576;GO:0005576;GO:0005604;GO:0005604;GO:0005614;GO:0005614;GO:0007155;GO:0007155;GO:0007162;GO:0007528;GO:0007528;GO:0008284;GO:0008284;GO:0009611;GO:0009611;GO:0009612;GO:0010628;GO:0010628;GO:0014012;GO:0014012;GO:0031012;GO:0031175;GO:0042060;GO:0042127;GO:0042127;GO:0042475;GO:0045471;GO:0045545;GO:0045545;GO:0060447;GO:0060739;GO:0060739;GO:0060740;GO:0060740;GO:…	K06252	-	-	-	tenascin C [Source:RGD Symbol;Acc:621057]	116640	B2LYI9
ENSRNOG00000055966	20.5248	6.35314	34.6964	5.4613	2.44924	0.0473035	0.493785	4	162493908	162499342	+	528	AABR07062138.2	GO:0009897;GO:0016020;GO:0016021;GO:0046703;	-	-	T;V	0UVA0;0VI61;1B6CS;0DU77;KOG4297;0A77D;13YB3;1D3EM	-	-	-
ENSRNOG00000006715	40.3817	12.6337	68.1297	5.39268	2.431	0.00973578	0.24654	8	132996649	133002201	-	1846	Ccr1	GO:0004435;GO:0004930;GO:0004930;GO:0004930;GO:0004950;GO:0004950;GO:0004950;GO:0005737;GO:0005886;GO:0005886;GO:0006816;GO:0006874;GO:0006887;GO:0006935;GO:0006935;GO:0006954;GO:0006954;GO:0006954;GO:0006954;GO:0006954;GO:0006955;GO:0006955;GO:0006955;GO:0006955;GO:0007165;GO:0007186;GO:0007186;GO:0007186;GO:0007204;GO:0007204;GO:0007267;GO:0009897;GO:0009897;GO:0009897;GO:0010629;GO:0016020;GO:…	K04176	-	T	KOG3656;1CRZB;0V6YN;0UJ3V;1AVN0;09T6C;13K12;0DH9A;191UI	C-C motif chemokine receptor 1 [Source:RGD Symbol;Acc:708446]	57301	Q9JLY8
ENSRNOG00000021438	148.943	46.8007	251.086	5.365	2.42358	0.00439851	0.162095	7	140716113	140723714	+	1533	Tuba1c	GO:0003924;GO:0005200;GO:0005525;GO:0005874;GO:0007017;	K07374	-	-	-	tubulin, alpha 1C [Source:RGD Symbol;Acc:1307226]	300218	Q6AYZ1
ENSRNOG00000022521	9.60908	3.02411	16.194	5.35497	2.42088	0.0275409	0.389272	1	157675765	157700064	-	3329	Ddias	GO:0005634;GO:0005634;GO:0005737;GO:0005737;GO:0006974;GO:0007286;GO:0030097;GO:0034644;GO:0071345;GO:0071447;GO:0071480;GO:0071850;GO:0071850;GO:0097752;GO:1902230;GO:1902230;GO:1902230;GO:2000270;	-	-	S	09ZXA;0UQNM;0V8B8;1B1QB;18XE9;0DFF1;1CWB8;0IGF0;12SD9	DNA damage-induced apoptosis suppressor [Source:RGD Symbol;Acc:1559690]	499204	B2GV00
ENSRNOG00000060831	63.0096	19.9208	106.098	5.32602	2.41306	0.00414613	0.156924	2	250897969	250923744	-	3652	Clca1	GO:0003674;GO:0005229;GO:0005229;GO:0005229;GO:0005887;GO:0005902;GO:0005902;GO:0006508;GO:0006821;GO:0006821;GO:0008233;GO:0008237;GO:0016021;GO:0016021;GO:0016787;GO:0030141;GO:0030141;GO:0042589;GO:0046872;GO:0071456;	K05027	-	-	-	chloride channel accessory 1 [Source:RGD Symbol;Acc:1306258]	308015	A0A0G2JWX9
ENSRNOG00000014797	1568.24	497.49	2639	5.30462	2.40725	1.06214e-06	0.000585948	9	81569289	81586553	-	3712	Tmbim1	GO:0005123;GO:0005123;GO:0005123;GO:0005765;GO:0005765;GO:0005794;GO:0005794;GO:0005794;GO:0010008;GO:0010008;GO:0016020;GO:0016021;GO:0043086;GO:0043086;GO:0043231;GO:1902042;GO:1902042;GO:1902042;GO:1902045;GO:1902045;GO:1902045;GO:1903077;GO:1903077;GO:1903077;GO:2000504;GO:2000504;GO:0005123;GO:0005765;GO:0005794;GO:0010008;GO:0016020;GO:0016021;GO:0043086;GO:1902042;GO:1902045;GO:1903077;GO:…	K24205	-	T	1CV44;0A48Z;13KHB;0UP78;0VCZI;0DKA5;1AYSJ;KOG2322;191FS	transmembrane BAX inhibitor motif containing 1 [Source:RGD Symbol;Acc:1359409]	316516	Q6AYE0
ENSRNOG00000036942	31.1863	9.8981	52.4746	5.30148	2.40639	0.00021475	0.0350786	5	168009393	168035810	+	1711	Tnfrsf9	GO:0005515;GO:0005615;GO:0006915;GO:0006915;GO:0008285;GO:0008285;GO:0009897;GO:0009897;GO:0009897;GO:0009897;GO:0016020;GO:0016021;GO:0019955;GO:0019955;GO:0032693;GO:0032695;GO:0038023;GO:0038023;GO:0038023;GO:0038023;GO:0042127;GO:0042127;GO:0042802;GO:0005515;GO:0005615;GO:0006915;GO:0006915;GO:0008285;GO:0008285;GO:0009897;GO:0009897;GO:0009897;GO:0009897;GO:0016020;GO:0016021;GO:0019955;GO:…	K05146	-	T	1D12G;1AZW0;1966K;0VF4P;13P0A;0IW3N;0DQGQ;0USZ5;0A4A0	TNF receptor superfamily member 9 [Source:RGD Symbol;Acc:1598208]	500590	Q4V895
ENSRNOG00000013668	179.277	57.0185	301.536	5.28839	2.40283	0.000290863	0.0395162	4	100407658	100419446	+	1476	Capg	GO:0001726;GO:0003779;GO:0005546;GO:0005615;GO:0005634;GO:0005634;GO:0005634;GO:0005654;GO:0005730;GO:0005730;GO:0005737;GO:0005737;GO:0005737;GO:0005737;GO:0005814;GO:0005814;GO:0007417;GO:0008154;GO:0015629;GO:0019904;GO:0019904;GO:0030027;GO:0030031;GO:0030031;GO:0042470;GO:0042995;GO:0044877;GO:0044877;GO:0045335;GO:0051014;GO:0051015;GO:0051015;GO:0051015;GO:0051016;GO:0051016;GO:0051016;GO:…	K10368	-	Z	13HHD;190Y7;KOG0443;1D0BW;0UU7U;0DR6G;0VEF2;1B2TK;0A3JT	capping actin protein, gelsolin like [Source:RGD Symbol;Acc:1311724]	297339	Q6AYC4
ENSRNOG00000013970	38.8638	12.3995	65.3281	5.26863	2.39743	0.0200265	0.335728	19	55381565	55386511	+	2239	Cdt1	GO:0000076;GO:0000076;GO:0000076;GO:0000076;GO:0000278;GO:0000278;GO:0000278;GO:0000776;GO:0000776;GO:0003677;GO:0003677;GO:0003677;GO:0003682;GO:0003682;GO:0005634;GO:0005634;GO:0005634;GO:0005634;GO:0005654;GO:0007049;GO:0007059;GO:0007059;GO:0016604;GO:0030174;GO:0030174;GO:0030174;GO:0030174;GO:0031334;GO:0031334;GO:0033044;GO:0033044;GO:0033262;GO:0033262;GO:0035563;GO:0035563;GO:0045740;GO:…	K10727	-	L	0V69A;0DGIF;18UBC;1ATWE;0UICA;KOG4762;1CR89;12R7D;09VA2	chromatin licensing and DNA replication factor 1 [Source:RGD Symbol;Acc:1309211]	292071	D3ZKD4
ENSRNOG00000019141	202.136	64.5888	339.684	5.25918	2.39484	0.000984669	0.0750038	1	252807065	252808380	-	1316	Ch25h	GO:0000254;GO:0001567;GO:0001567;GO:0001567;GO:0001567;GO:0004497;GO:0005506;GO:0005506;GO:0005783;GO:0005789;GO:0005789;GO:0006629;GO:0006694;GO:0008202;GO:0008203;GO:0008203;GO:0008203;GO:0008395;GO:0008395;GO:0008395;GO:0008610;GO:0008610;GO:0016020;GO:0016020;GO:0016021;GO:0016126;GO:0016126;GO:0016491;GO:0016491;GO:0016491;GO:0016491;GO:0035754;GO:0035754;GO:0035754;GO:0046872;GO:0055114;	K10223	EC:1.14.99.38	I	0VDNC;0A2SV;0DQEU;1ASUG;KOG0873;1CZGS;135H8;0UKEC;18VSA	cholesterol 25-hydroxylase [Source:RGD Symbol;Acc:1310575]	309527	Q4QQV7
ENSRNOG00000012881	743.15	237.7	1248.6	5.25283	2.39309	0.0144611	0.29171	4	10323607	10329241	-	3686	Fgl2	GO:0002291;GO:0002291;GO:0002605;GO:0002605;GO:0002617;GO:0002617;GO:0005102;GO:0005615;GO:0006508;GO:0007567;GO:0008233;GO:0008233;GO:0008233;GO:0043381;GO:0043381;GO:0050687;GO:0050687;GO:0062023;	-	-	S;E	1CST4;09WSV;0DI2K;12Q3T;0UPWT;1AZK0;KOG2579;0V7R2;1914D	fibrinogen-like 2 [Source:RGD Symbol;Acc:620170]	84586	G3V7P2;Q6IN12
ENSRNOG00000009433	23.788	7.64031	39.9357	5.22697	2.38597	0.0403655	0.463319	2	230199343	230273709	-	1200	Mcub	GO:0005739;GO:0005739;GO:0005739;GO:0005743;GO:0006811;GO:0006816;GO:0006851;GO:0006851;GO:0016020;GO:0016021;GO:0019855;GO:0019855;GO:0019855;GO:0031224;GO:0031224;GO:0031305;GO:0031305;GO:0034704;GO:0034704;GO:0036444;GO:0051560;GO:0051560;GO:0051560;GO:0051560;GO:0051560;GO:0051560;GO:1990246;GO:1990246;	K22829	-	S;O	KOG2966;0V44W;1CP71;13MF3;0UMDA;0DEHA;18UEF;1B1A0;09T63	mitochondrial calcium uniporter dominant negative beta subunit [Source:RGD Symbol;Acc:1305326]	295462	F1LUQ0
ENSRNOG00000028768	25.8751	8.32089	43.4293	5.21931	2.38386	0.00171049	0.10045	2	248249468	248263168	+	2626	Gbp4	GO:0003924;GO:0003924;GO:0003924;GO:0005525;GO:0005525;GO:0005525;GO:0005634;GO:0005829;GO:0005829;GO:0020005;GO:0031410;GO:0031410;GO:0031410;GO:0035458;GO:0035458;GO:0042803;GO:0042832;GO:0042832;GO:0042832;GO:0044406;GO:0044406;GO:0048471;GO:0050830;GO:0050830;GO:0050830;GO:0071346;GO:0071346;GO:0071346;	K20899	-	S;O;T;D;C;K	191WI;0V9BC;134KU;09XSJ;1AYRV;KOG2037;1CUKV;0UNNF;0DJTQ	guanylate binding protein 4 [Source:RGD Symbol;Acc:1310579]	310917	D3ZQL3
ENSRNOG00000003064	19.1882	6.17471	32.2016	5.21508	2.38269	0.0222084	0.354177	14	71798651	71814523	-	957	Bst1	GO:0001931;GO:0001952;GO:0003953;GO:0008284;GO:0019898;GO:0032956;GO:0050727;GO:0050730;GO:0050848;GO:0061811;GO:0061812;GO:0090022;	K18152	-	G	1CU7A;09Y1S;0DJES;1AXN4;18VUJ;13I3N;0V8Z9;0UJ62;0IP4Q	bone marrow stromal cell antigen 1 [Source:RGD Symbol;Acc:620344]	81506	Q63072
ENSRNOG00000057153	320.22	103.308	537.132	5.19933	2.37832	0.0102111	0.250112	11	64882288	64919579	+	1728	Pla1a	GO:0002080;GO:0004806;GO:0006629;GO:0008970;GO:0052689;	K13618	EC:3.1.1.111	-	-	phospholipase A1 member A [Source:RGD Symbol;Acc:621261]	85311	P97535
ENSRNOG00000036692	19.0848	6.16352	32.0061	5.19283	2.37652	0.00252495	0.123811	10	109707962	109716128	+	1928	Gcgr	GO:0004888;GO:0004930;GO:0004967;GO:0004967;GO:0004967;GO:0005887;GO:0007166;GO:0007186;GO:0007188;GO:0007188;GO:0007189;GO:0009267;GO:0010628;GO:0016020;GO:0016021;GO:0042593;GO:0042594;GO:0070873;GO:0071377;GO:0071377;GO:0004888;GO:0004888;GO:0004930;GO:0004930;GO:0004967;GO:0004967;GO:0007166;GO:0007166;GO:0007186;GO:0007186;GO:0016020;GO:0016020;GO:0016020;GO:0016021;GO:0016021;GO:0016021;GO:…	K04583	-	T	09UJY;12NT5;0DFVK;0UG6T;KOG4564;18S91;0V4SW;1CQIZ;1AY2W	glucagon receptor [Source:RGD Symbol;Acc:2669]	24953	P30082;Q66HT0
ENSRNOG00000005352	44.6495	14.5736	74.7254	5.12744	2.35824	0.000865804	0.0690316	X	135240451	135250519	-	2448	Elf4	GO:0000978;GO:0000978;GO:0000981;GO:0000981;GO:0000981;GO:0001228;GO:0001228;GO:0001787;GO:0001787;GO:0001787;GO:0001787;GO:0001866;GO:0001866;GO:0001866;GO:0001866;GO:0003677;GO:0003700;GO:0003700;GO:0005634;GO:0005634;GO:0005654;GO:0006355;GO:0006355;GO:0006357;GO:0016604;GO:0016605;GO:0016605;GO:0030154;GO:0043565;GO:0043565;GO:0045087;GO:0045087;GO:0045893;GO:0045893;GO:0045893;GO:0045944;GO:…	K09428	-	K	1AU8I;190ME;KOG3804;13QSC;0UQSV;0DMK0;0A00C;1CWFA;0VAX0	E74 like ETS transcription factor 4 [Source:RGD Symbol;Acc:1560743]	302811	D3ZWM8
ENSRNOG00000028801	80.8617	26.5139	135.209	5.09956	2.35037	0.0214098	0.346397	4	10423139	10517848	-	3771	Gsap	GO:0001540;GO:0001540;GO:0005802;GO:0005802;GO:0005802;GO:0030162;GO:0030162;GO:1902004;GO:1902004;GO:1902004;GO:1902004;GO:0001540;GO:0005802;GO:0005802;GO:0030162;GO:1902004;GO:1902004;	-	-	S	09TMX;0IG5Q;12RXV;0V4KZ	gamma-secretase activating protein [Source:RGD Symbol;Acc:1563271]	311984	D3ZPQ9
ENSRNOG00000009734	96.7178	31.7308	161.705	5.09615	2.34941	0.0479122	0.496155	4	61771970	61828657	+	2472	Akr1b8	GO:0001523;GO:0001758;GO:0004032;GO:0004032;GO:0005739;GO:0005829;GO:0005829;GO:0008106;GO:0016488;GO:0016491;GO:0016491;GO:0016491;GO:0016918;GO:0019751;GO:0042572;GO:0042574;GO:0044597;GO:0044598;GO:0045550;GO:0047718;GO:0047834;GO:0052650;GO:0055114;GO:0070401;GO:0070402;GO:0110095;GO:0004032;GO:0005739;GO:0005829;GO:0016491;GO:0016491;GO:0016491;GO:0047834;GO:0055114;GO:0001523;GO:0001758;GO:…	K00011	EC:1.1.1.21	C;K	09V48;0DGDE;0V63V;KOG1577;12P3Z;1CR2V;09V48;0DGDE;0V63V;KOG1577;0UJYK;12P3Z;19506;1AUR6	aldo-keto reductase family 1, member B8 [Source:RGD Symbol;Acc:708475]	296972	Q6AY99
ENSRNOG00000002167	18.2838	6.01654	30.551	5.07783	2.34421	0.00971353	0.24654	14	6889856	6900733	-	2724	Dmp1	GO:0001503;GO:0001503;GO:0005634;GO:0010811;GO:0030198;GO:0030198;GO:0030198;GO:0031012;GO:0050840;GO:0070173;	K23328	-	O;W	13N4M;KOG1181;1CVJX;0UPRP;09Z94;0DKRB;0VA6B;18T79;1AZE6	dentin matrix acidic phosphoprotein 1 [Source:RGD Symbol;Acc:2508]	25312	A2VD06
ENSRNOG00000019390	33.6117	11.1889	56.0346	5.00807	2.32426	0.000230155	0.0355083	8	130416355	130421871	+	2266	Klhl40	GO:0005515;GO:0031397;GO:0048741;	K10473	-	T	KOG4441	kelch-like family member 40 [Source:RGD Symbol;Acc:1305368]	316088	-
ENSRNOG00000011316	77.7356	25.9205	129.551	4.99799	2.32135	1.14731e-06	0.000614319	15	46613810	46643772	+	4023	Fam167a	-	-	-	S	0UPY1;191GX;1CVQV;0VAAC;09ZDC;13K6I;0IIXX;0DKVP;1AYU1	family with sequence similarity 167, member A [Source:RGD Symbol;Acc:1561302]	498533	D3ZQX1
ENSRNOG00000005608	111.294	37.1576	185.431	4.99038	2.31915	0.0291039	0.393553	4	161540130	161587222	-	5253	Tead4	GO:0000978;GO:0000978;GO:0000978;GO:0000981;GO:0001228;GO:0001228;GO:0001701;GO:0001701;GO:0001708;GO:0001708;GO:0001825;GO:0001825;GO:0001830;GO:0001830;GO:0003677;GO:0003677;GO:0003677;GO:0003700;GO:0003700;GO:0003700;GO:0003700;GO:0003700;GO:0005634;GO:0005634;GO:0005654;GO:0005667;GO:0005667;GO:0005667;GO:0005737;GO:0005737;GO:0006355;GO:0006355;GO:0006357;GO:0006357;GO:0006357;GO:0007566;GO:…	K09448	-	K	12RVX;191A5;09THZ;0UPSI;KOG3841;1CPIE;0DEUQ;0V4GX;1B37V	TEA domain transcription factor 4 [Source:RGD Symbol;Acc:1585671]	683522	-
ENSRNOG00000019311	184.193	61.7505	306.636	4.96572	2.312	0.00403919	0.156479	1	266053002	266059256	+	3070	Nfkb2	GO:0000978;GO:0000978;GO:0000978;GO:0000981;GO:0001228;GO:0001228;GO:0002268;GO:0002268;GO:0002467;GO:0002467;GO:0003677;GO:0003677;GO:0003677;GO:0003700;GO:0003700;GO:0005515;GO:0005515;GO:0005634;GO:0005634;GO:0005634;GO:0005634;GO:0005737;GO:0005737;GO:0005737;GO:0005737;GO:0005737;GO:0005829;GO:0005829;GO:0006355;GO:0006355;GO:0006355;GO:0006355;GO:0006357;GO:0007165;GO:0007165;GO:0007568;GO:…	K04469	-	K;E	0VD3P;KOG0504;0A3C4;18TUE;1B0KB;0UJGQ;1CTIN;0DITA;13GBI	nuclear factor kappa B subunit 2 [Source:RGD Symbol;Acc:1307189]	309452	Q5U2Z4
ENSRNOG00000008816	775.613	260.758	1290.47	4.94891	2.30711	0.00118273	0.0821815	4	78694447	78715683	+	2306	Gpnmb	GO:0001818;GO:0001934;GO:0001934;GO:0005178;GO:0005887;GO:0007155;GO:0007165;GO:0007267;GO:0008201;GO:0008201;GO:0016021;GO:0030335;GO:0031410;GO:0031954;GO:0032720;GO:0034103;GO:0034103;GO:0042130;GO:0045545;GO:0048018;GO:0050868;GO:0070374;GO:1901215;GO:2000134;	K20732	-	S;W	0VESI;0A3XQ;0UHCK;0IE9P;0DPKX;1AYZQ;12T0E;1CYK0;18UDN	glycoprotein nmb [Source:RGD Symbol;Acc:71008]	113955	Q9QZF6
ENSRNOG00000015078	596.116	201.221	991.011	4.92499	2.30012	0.0115189	0.263181	1	213810696	213811901	-	700	Ifitm3	GO:0016021;	K06566	-	S;T	13XNX;0VJSA;1D4IR;0A8GR;0UVYW;0DV1U;0J2DU;1B6FV	interferon induced transmembrane protein 3 [Source:RGD Symbol;Acc:1595844]	361673	P26376
ENSRNOG00000027736	32.8977	11.1385	54.657	4.90704	2.29485	0.00566137	0.182877	8	23113048	23121761	+	1500	Cnn1	GO:0003779;GO:0003779;GO:0003779;GO:0003779;GO:0005515;GO:0005516;GO:0005856;GO:0005856;GO:0031032;GO:0031032;GO:1904706;GO:1904706;	-	-	Z	1CYR7;1B5BV;18ZKF;KOG2046;0VDP2;0A2XZ;0UTTE;0DPS0;13HAN	calponin 1 [Source:RGD Symbol;Acc:621883]	65204	Q08290
ENSRNOG00000026488	51.2994	17.3766	85.2223	4.90444	2.29409	0.0341919	0.425445	10	57125961	57128686	+	2444	Gltpd2	GO:0005737;GO:0005737;GO:0005829;GO:0016020;GO:0016020;GO:0016021;GO:0035627;GO:0120009;GO:0120009;GO:0120009;GO:0120013;GO:0120013;GO:1902387;GO:1902388;GO:1902389;	-	-	U	0A4HH;1D19H;0DS0E;1AWQI;0UR7D;195K7;13KPN;KOG4189;0VFCI	glycolipid transfer protein domain containing 2 [Source:RGD Symbol;Acc:1560459]	497943	B0BNN1
ENSRNOG00000048932	37.5307	12.8867	62.1747	4.82471	2.27044	0.00406619	0.15682	7	142244295	142260896	-	1496	Smagp	GO:0005654;GO:0005886;GO:0030054;	-	-	U	0A8WU;0DV01;13WRM;1D4AQ;0VJT3;0J3FG;0UVXG;193RT;1B6M0	small cell adhesion glycoprotein [Source:RGD Symbol;Acc:727777]	300236	Q7TPF1
ENSRNOG00000002511	102.464	35.2347	169.693	4.81607	2.26786	0.0284902	0.391209	10	35078726	35121599	+	5717	Flt4	GO:0000166;GO:0001525;GO:0001934;GO:0001938;GO:0001944;GO:0001945;GO:0001946;GO:0001946;GO:0002040;GO:0003016;GO:0004672;GO:0004672;GO:0004713;GO:0004713;GO:0004713;GO:0004714;GO:0004714;GO:0004714;GO:0004714;GO:0004714;GO:0005021;GO:0005021;GO:0005021;GO:0005021;GO:0005524;GO:0005524;GO:0005524;GO:0005634;GO:0005654;GO:0005829;GO:0005886;GO:0005886;GO:0005887;GO:0005887;GO:0006468;GO:0006468;GO:…	K05097	EC:2.7.10.1	T	0V51R;1CQ26;09U2S;KOG0200;18ZZK;1AYCZ;0USB4;0DFCG;12TBY	fms-related tyrosine kinase 4 [Source:RGD Symbol;Acc:621737]	114110	Q91ZT1
ENSRNOG00000046452	280.41	97.5365	463.283	4.74984	2.24788	3.71915e-05	0.00981262	13	89327794	89433815	-	3699	Fcgr2b	GO:0001540;GO:0001811;GO:0002434;GO:0002638;GO:0002862;GO:0002865;GO:0002924;GO:0004888;GO:0005886;GO:0005886;GO:0005887;GO:0005887;GO:0006898;GO:0006911;GO:0006952;GO:0007166;GO:0007166;GO:0009617;GO:0009897;GO:0009986;GO:0016020;GO:0016021;GO:0016021;GO:0016064;GO:0016358;GO:0019772;GO:0019864;GO:0019864;GO:0019865;GO:0019886;GO:0021549;GO:0030889;GO:0032355;GO:0032456;GO:0032693;GO:0033030;GO:…	K12560	-	W;T	0V8DY;1CTIQ;1AUTP;18YEM;140GW;0DITC;0J9AP;0UMEI;09XFS	Fc fragment of IgG receptor IIb [Source:RGD Symbol;Acc:631331]	289211	Q63203;Q5BKD6
ENSRNOG00000025476	142.383	49.6128	235.153	4.73976	2.24481	0.000608687	0.0589422	1	242572533	242577817	+	2077	Tmem252	-	-	-	S	0A71H;1B5B8;193AW;0UV15;13U5C;0IZEX;1D3B1;0VHQK;0DSFX	transmembrane protein 252 [Source:RGD Symbol;Acc:1359349]	361744	Q6AXS2
ENSRNOG00000023226	692.347	242.329	1142.36	4.71409	2.23698	0.000361167	0.0438336	2	193892589	193901236	+	573	S100a10	GO:0001765;GO:0005509;GO:0005509;GO:0006900;GO:0016020;GO:0016021;GO:0019897;GO:0042803;GO:0043547;GO:0044325;GO:0045121;GO:0051099;GO:0051496;GO:0051894;GO:0072659;GO:1900026;GO:1990665;	K17274	-	-	-	S100 calcium binding protein A10 [Source:RGD Symbol;Acc:628655]	81778	P05943;B3Y9H3
ENSRNOG00000013987	986.327	345.738	1626.92	4.70563	2.23439	0.000525261	0.055884	7	12471824	12518654	+	7781	Sbno2	GO:0002281;GO:0002281;GO:0005634;GO:0006355;GO:0006355;GO:0006355;GO:0030282;GO:0030316;GO:0030316;GO:0031490;GO:0042393;GO:0045892;GO:0045892;GO:0045944;GO:0045944;GO:0050727;GO:0050727;GO:0050727;GO:0050727;GO:0061430;GO:0071222;GO:0071348;GO:0071354;GO:0071354;GO:0072674;GO:0072675;GO:1990830;GO:0002281;GO:0002281;GO:0002281;GO:0002281;GO:0005634;GO:0006355;GO:0006355;GO:0006355;GO:0030282;GO:…	-	-	T;K	0A037;0DMI8;KOG1513;12NTI;191FB;0VAZE;1ATNQ;1CXV4;0UPHZ	strawberry notch homolog 2 [Source:RGD Symbol;Acc:1307194]	314619	D3ZDU8
ENSRNOG00000004772	15.2157	5.33954	25.0918	4.69924	2.23243	0.00834944	0.22541	3	44150992	44177689	-	1664	Cytip	GO:0005515;GO:0005654;GO:0005737;GO:0005737;GO:0005737;GO:0005768;GO:0005769;GO:0005829;GO:0005938;GO:0005938;GO:0005938;GO:0030155;GO:0030155;GO:0030155;	-	-	O	197EX;0ITA8;0E9C3;13FTJ;1DG7F;0B66B;0WIW1;0V3RU;1BBF6	cytohesin 1 interacting protein [Source:RGD Symbol;Acc:1307990]	311047	Q5I0L6
ENSRNOG00000008015	772.478	272.089	1272.87	4.67812	2.22593	0.000596095	0.0583477	6	109300433	109303299	+	1589	Fos	GO:0000976;GO:0000976;GO:0000978;GO:0000978;GO:0000978;GO:0000979;GO:0000979;GO:0000981;GO:0001102;GO:0001102;GO:0001228;GO:0001228;GO:0001661;GO:0003677;GO:0003677;GO:0003677;GO:0003677;GO:0003677;GO:0003682;GO:0003682;GO:0003690;GO:0003700;GO:0003700;GO:0003700;GO:0003700;GO:0003700;GO:0005515;GO:0005515;GO:0005634;GO:0005634;GO:0005634;GO:0005634;GO:0005634;GO:0005634;GO:0005654;GO:0005654;GO:…	K04379	-	K	0VBM4;1AWTS;18ZBU;13HYQ;1CX97;0UUEW;0A0QR;KOG1414;0DNC6	Fos proto-oncogene, AP-1 transcription factor subunit [Source:RGD Symbol;Acc:2626]	314322	P12841
ENSRNOG00000057832	51.2939	18.0869	84.501	4.67194	2.22402	0.00880817	0.234091	18	15192962	15225427	-	1376	Rnf125	GO:0000139;GO:0000209;GO:0002039;GO:0006511;GO:0008270;GO:0031624;GO:0032480;GO:0034098;GO:0039536;GO:0043231;GO:0061630;GO:1990830;	K12170	EC:2.3.2.27	-	-	ring finger protein 125 [Source:RGD Symbol;Acc:1306757]	361296	B1WCA3
ENSRNOG00000031167	365.655	129.082	602.228	4.66547	2.22202	7.49204e-10	2.72785e-06	3	147609095	147632801	+	732	AABR07054319.1	GO:0000166;GO:0005524;GO:0005737;GO:0016209;GO:0016491;GO:0032542;GO:0032542;GO:0032542;GO:0032542;GO:0032542;GO:0034599;GO:0055114;GO:0098869;	-	-	L	KOG3388	sulfiredoxin 1 [Source:NCBI gene;Acc:296271]	-	-
ENSRNOG00000003716	11.5047	4.08237	18.927	4.63628	2.21297	0.0308193	0.403123	13	109713489	109724863	+	399	Batf3	GO:0000122;GO:0000978;GO:0001227;GO:0003677;GO:0003700;GO:0005654;GO:0005730;GO:0005829;GO:0006355;GO:0006357;GO:0009615;GO:0043011;GO:0097028;GO:1990837;	K09034	-	K	0A8W8;0DV8W;0UW5N;KOG1414;193JS;1B6EI;1D4K9;0VIR3;13RYW	basic leucine zipper ATF-like transcription factor 3 [Source:RGD Symbol;Acc:620501]	60462	P97876
ENSRNOG00000019202	229.194	81.4501	376.939	4.62785	2.21034	0.0240652	0.366566	1	80820050	80835701	-	2164	Pvr	GO:0001618;GO:0002860;GO:0005886;GO:0005912;GO:0007156;GO:0007157;GO:0009986;GO:0016020;GO:0016021;GO:0016021;GO:0016477;GO:0042271;GO:0045503;GO:0045954;GO:0046718;GO:0050839;GO:0060370;GO:0098609;	K06539	-	-	-	PVR cell adhesion molecule [Source:RGD Symbol;Acc:3813]	25066	Q5U334
ENSRNOG00000038483	27.8557	9.95027	45.7612	4.599	2.20132	0.00144263	0.0921514	15	51433859	51463718	+	1817	AABR07018323.1	GO:0005515;GO:0007165;GO:0007165;GO:0016020;GO:0016021;GO:0005515;GO:0005886;GO:0006915;GO:0007165;GO:0007165;GO:0009986;GO:0016020;GO:0016021;GO:0036462;GO:0043065;	-	-	T	1D113;193IZ;0VHIU;1B5KK;13SSI;0DRSY;0UPZY;0IZX0;0A701	-	-	-
ENSRNOG00000031163	142.893	51.1008	234.685	4.59259	2.19931	0.00175303	0.101617	11	47243342	47271487	+	4052	Nfkbiz	GO:0005515;GO:0005634;GO:0005634;GO:0006954;GO:0010468;GO:0050729;GO:0050852;GO:2000321;GO:0005515;GO:0005634;GO:0005634;GO:0005634;GO:0006954;GO:0006954;GO:0010468;GO:0016607;GO:0036464;GO:0050729;GO:0050729;GO:0050852;GO:0050852;GO:2000321;GO:2000321;	K14242	-	K;E	0DKBA;KOG0504;13JN0;09YW3;0V9TX	NFKB inhibitor zeta [Source:RGD Symbol;Acc:1310834]	304005	D4A1S9
ENSRNOG00000003954	76.979	27.6223	126.336	4.57368	2.19335	0.0134751	0.283928	X	71162585	71169865	-	2946	Il2rg	GO:0004896;GO:0004896;GO:0004896;GO:0005515;GO:0009897;GO:0009897;GO:0009986;GO:0010468;GO:0010628;GO:0016020;GO:0016020;GO:0016020;GO:0016021;GO:0019221;GO:0019955;GO:0019976;GO:0032831;GO:0033089;GO:0035723;GO:0042010;GO:0043235;GO:0045579;GO:0045621;GO:0050766;GO:0004896;GO:0004896;GO:0004896;GO:0005515;GO:0009897;GO:0009897;GO:0009986;GO:0010468;GO:0010628;GO:0016020;GO:0016020;GO:0016020;GO:…	K05070	-	W	1D0SH;1B2NM;0IGNI;0A0U8;13NM7;0USI1;0DRPE;1910U;0VDA6	interleukin 2 receptor subunit gamma [Source:RGD Symbol;Acc:621466]	140924	Q68FU6
ENSRNOG00000043044	128.893	46.2988	211.487	4.56786	2.19152	0.00624609	0.192652	7	12782491	12787750	+	723	Cnn2	GO:0001725;GO:0003779;GO:0005515;GO:0005856;GO:0007010;GO:0031032;GO:0032970;GO:0071260;	-	-	Z	KOG2046;0VDP2;0A2XZ;13HAN	calponin 2 [Source:RGD Symbol;Acc:1589807]	690976	-
ENSRNOG00000002309	33.3934	12.0015	54.7852	4.56485	2.19057	0.0150056	0.295217	13	102637769	102643223	-	2161	Hlx	GO:0000981;GO:0001889;GO:0003677;GO:0006355;GO:0007519;GO:0008284;GO:0043565;GO:0045627;GO:0045629;GO:0046622;GO:0048484;GO:0048513;GO:0048557;	K09339	-	K	1AV0P;18W2N;KOG0488;09W4K;0V72Y;0DHDQ;0UJI5;1CS3X;13UQ9	H2.0-like homeobox [Source:RGD Symbol;Acc:1311961]	364069	A0JPN1
ENSRNOG00000014011	168.986	61.4995	276.472	4.49551	2.16849	0.00786586	0.216311	3	111135021	111145986	+	4561	Dll4	GO:0000122;GO:0001525;GO:0001569;GO:0001974;GO:0003208;GO:0003209;GO:0003222;GO:0003344;GO:0005112;GO:0005509;GO:0007154;GO:0007219;GO:0007219;GO:0007275;GO:0008285;GO:0010596;GO:0010628;GO:0010629;GO:0016020;GO:0016021;GO:0030217;GO:0035912;GO:0035924;GO:0043537;GO:0044344;GO:0045746;GO:0045747;GO:0050767;GO:0060579;GO:0061074;GO:0061314;GO:0072554;GO:0090051;GO:1903588;GO:2000179;	K06051	-	T	0DI6N;1B0VC;KOG1217;0UFDP;18Z90;09ZC6;0VA9C;12PNX;1CVPJ	delta like canonical Notch ligand 4 [Source:RGD Symbol;Acc:1309740]	311332	-
ENSRNOG00000059618	142.489	51.8801	233.098	4.49301	2.16768	0.0435121	0.477219	10	63662986	63670639	+	1359	Scarf1	GO:0005044;GO:0005044;GO:0005044;GO:0006898;GO:0006898;GO:0010976;GO:0010976;GO:0016020;GO:0016021;GO:0016021;GO:0016021;GO:0016021;GO:0016322;GO:0016358;GO:0030169;GO:0030169;GO:0048680;	-	-	-	-	scavenger receptor class F, member 1 [Source:RGD Symbol;Acc:1309330]	-	-
ENSRNOG00000050792	118.311	43.0982	193.524	4.49031	2.16682	0.00324038	0.140122	3	37545238	37564699	+	1363	Tnfaip6	GO:0003674;GO:0005540;GO:0005540;GO:0005615;GO:0005615;GO:0007155;GO:0007155;GO:0030335;GO:0030728;GO:0050728;GO:0050728;GO:0050728;	K19018	-	O;T	KOG3714;KOG1218	TNF alpha induced protein 6 [Source:RGD Symbol;Acc:621359]	84397	B0BN34
ENSRNOG00000020938	745.218	272.844	1217.59	4.46259	2.15788	0.00430087	0.160084	1	101511901	101514974	-	2420	Ppp1r15a	-	K14019	-	T	0USCT;1CZEM;0ITE6;12TD0;0A2QW;1AW9F;0DQCM;0VDKN;193NM	protein phosphatase 1, regulatory subunit 15A [Source:RGD Symbol;Acc:621526]	171071	Q6IN02;A0A0G2JSW4
ENSRNOG00000002217	83.7646	30.6965	136.833	4.4576	2.15627	0.0168539	0.313161	14	10692764	10714524	+	733	Plac8	GO:0003682;GO:0003682;GO:0008284;GO:0008284;GO:0009409;GO:0009409;GO:0040015;GO:0040015;GO:0042742;GO:0042742;GO:0043066;GO:0043066;GO:0045944;GO:0045944;GO:0045944;GO:0050873;GO:0050873;GO:0120162;GO:0120162;GO:0120162;	-	-	S;K	0IZNB;0UVCD;0VI95;0DU7J;1B5UQ;1D3JG;1934F;13T9I;0A7EN	placenta associated 8 [Source:RGD Symbol;Acc:1308102]	360914	B5DF36
ENSRNOG00000005935	178.53	65.5538	291.505	4.44681	2.15277	0.00268521	0.127771	5	146933592	146945880	+	1909	A3galt2	GO:0001962;GO:0001962;GO:0005794;GO:0005794;GO:0005975;GO:0005975;GO:0006688;GO:0006688;GO:0006688;GO:0006688;GO:0016020;GO:0016020;GO:0016020;GO:0016021;GO:0016740;GO:0016757;GO:0016757;GO:0016757;GO:0016758;GO:0016758;GO:0030259;GO:0030259;GO:0031982;GO:0031982;GO:0032580;GO:0046872;GO:0047276;GO:0047276;GO:0071287;	K20736	EC:2.4.1.87	G	12TQU;0V7AU;09WCE;1B4CJ;192DQ;0DHMS;1CSC7;0UJV3;0IHE7	alpha 1,3-galactosyltransferase 2 [Source:RGD Symbol;Acc:727913]	171553	A0A4Z3
ENSRNOG00000033153	84.7129	31.1988	138.227	4.43053	2.14748	0.00102367	0.0763768	5	151823887	151824633	-	747	Sfn	GO:0000079;GO:0001836;GO:0003334;GO:0003674;GO:0005575;GO:0005634;GO:0005737;GO:0005737;GO:0008150;GO:0008630;GO:0010482;GO:0010839;GO:0019901;GO:0030216;GO:0030307;GO:0031424;GO:0042802;GO:0043154;GO:0043588;GO:0045606;GO:0046827;GO:0051219;GO:0051726;GO:0061436;	-	-	O	0UNW5;1CUTR;KOG0841;1AYDP;18TYH;09YJE;0DJZU;13HCJ;0V9H4	stratifin [Source:RGD Symbol;Acc:1304729]	-	-
ENSRNOG00000005574	27.8295	10.3575	45.3015	4.37379	2.12888	0.0010406	0.0770085	8	32018560	32037531	+	3023	Adamts8	GO:0004222;GO:0004222;GO:0004222;GO:0005576;GO:0006508;GO:0006508;GO:0006508;GO:0008233;GO:0008237;GO:0008237;GO:0008237;GO:0008270;GO:0008270;GO:0030198;GO:0031012;GO:0062023;GO:0062023;	K08623	EC:3.4.24.-	O	1AZJG;0UPW8;0A2K7;18XPC;0VDG8;12TH9;1CZ96;0DQ7U;KOG3538	ADAM metallopeptidase with thrombospondin type 1 motif, 8 [Source:RGD Symbol;Acc:1308511]	300475	-
ENSRNOG00000020298	616.492	230.962	1002.02	4.33847	2.11719	5.68558e-07	0.00034877	1	199941161	199965191	+	2425	Bag3	GO:0000045;GO:0000774;GO:0000774;GO:0000774;GO:0001725;GO:0005515;GO:0005634;GO:0005634;GO:0005634;GO:0005737;GO:0005737;GO:0005737;GO:0005829;GO:0005829;GO:0005886;GO:0007420;GO:0008625;GO:0008625;GO:0010664;GO:0010664;GO:0010664;GO:0010664;GO:0016020;GO:0021510;GO:0030018;GO:0030018;GO:0031072;GO:0034605;GO:0034605;GO:0034620;GO:0034620;GO:0042307;GO:0042307;GO:0043005;GO:0043066;GO:0044877;GO:…	K09557	-	O;T	190E8;KOG4361;0VABT;KOG0940;09ZER;0DKX1;0UPZ2;1CVS9;12TKZ;1AZNI	Bcl2-associated athanogene 3 [Source:RGD Symbol;Acc:1307794]	293524	Q5U2U8
ENSRNOG00000038916	79.5284	29.9769	129.08	4.30597	2.10634	9.37332e-05	0.0198814	7	28898649	28932641	-	2742	Dram1	GO:0005737;GO:0005737;GO:0005764;GO:0005764;GO:0005764;GO:0010506;GO:0010506;GO:0010506;GO:0016020;GO:0016021;	K21955	-	S;T	KOG4320;0A1B4;13IZ4;18ZSY;0DNYR;0VC6S;0UG0B;1CXW9;1B37H	DNA-damage regulated autophagy modulator 1 [Source:RGD Symbol;Acc:1598133]	679937	B5DEF4
ENSRNOG00000015948	163.976	61.8155	266.136	4.30533	2.10612	0.0219891	0.35211	1	78710539	78724794	+	2753	Slc1a5	GO:0005886;GO:0006868;GO:0009925;GO:0010585;GO:0015175;GO:0015183;GO:0015183;GO:0015186;GO:0015194;GO:0015293;GO:0015293;GO:0015293;GO:0015825;GO:0016020;GO:0016021;GO:0016021;GO:0016021;GO:0016021;GO:0070207;GO:0140009;GO:0140009;GO:0150104;GO:1903803;GO:0005886;GO:0006868;GO:0015186;GO:0015293;GO:0016021;GO:0016021;GO:0070207;	K05616	-	E	KOG3787;09YDS;18WXF;0VDFD;1CZ8A;12QNC;1AUDN;0UTHS;0DQ6Y	solute carrier family 1 member 5 [Source:RGD Symbol;Acc:708512]	292657	Q9Z1J7
ENSRNOG00000004100	244.444	92.4137	396.473	4.2902	2.10104	0.00208165	0.11146	7	99954492	99961026	+	1972	Trib1	GO:0004672;GO:0004672;GO:0004860;GO:0004860;GO:0005524;GO:0005524;GO:0005634;GO:0005634;GO:0005634;GO:0005737;GO:0005737;GO:0006468;GO:0006468;GO:0006469;GO:0006469;GO:0007254;GO:0007254;GO:0008134;GO:0008134;GO:0008134;GO:0014912;GO:0014912;GO:0031434;GO:0031434;GO:0031434;GO:0031625;GO:0031625;GO:0031665;GO:0031665;GO:0032436;GO:0032436;GO:0032436;GO:0032496;GO:0032496;GO:0032496;GO:0043405;GO:…	K08814	-	T	1CTRK;KOG0583;12P1G;0V8UE;09XWW;1B3UK;0UQNY;18WDS;0DJ05	tribbles pseudokinase 1 [Source:RGD Symbol;Acc:621596]	78969	G3V6J8;Q9EQL6
ENSRNOG00000034174	9.09014	3.46112	14.7192	4.25272	2.08839	0.0496017	0.502783	3	149424392	149449350	+	2100	Bpifb4	GO:0005576;GO:0005737;GO:0008289;GO:0008289;	-	-	V	0A31M;1AU4D;18SYI;0VFTX;13KBI;0DS2P;1D1BR;0UQJ2;KOG4160	BPI fold containing family B, member 4 [Source:RGD Symbol;Acc:1561174]	499925	Q05704
ENSRNOG00000046667	288.161	110.652	465.671	4.20844	2.07329	0.000771739	0.0682015	1	80214494	80221710	-	3741	Fosb	GO:0000978;GO:0000978;GO:0000981;GO:0001228;GO:0003677;GO:0003677;GO:0003677;GO:0003690;GO:0003700;GO:0003700;GO:0003700;GO:0005634;GO:0005634;GO:0005634;GO:0005634;GO:0006357;GO:0006357;GO:0006357;GO:0006366;GO:0007565;GO:0009612;GO:0032570;GO:0032870;GO:0042493;GO:0043278;GO:0043565;GO:0045944;GO:0051412;GO:0051591;GO:0071277;GO:1990837;GO:0000978;GO:0000978;GO:0000978;GO:0000981;GO:0001228;GO:…	K09029	-	K	1B091;0VDJP;0UQ9C;1CW78;18YMU;138Q1;KOG1414;0DMC2;0A2PT	FosB proto-oncogene, AP-1 transcription factor subunit [Source:RGD Symbol;Acc:1308198]	100360880	D3ZLB7
ENSRNOG00000011823	34.2594	13.1752	55.3436	4.20059	2.07059	0.00526971	0.178318	9	25410669	25440411	+	5743	Tfap2b	GO:0003700;GO:0005634;GO:0006355;GO:0000122;GO:0000122;GO:0000977;GO:0000978;GO:0000978;GO:0000978;GO:0000981;GO:0000981;GO:0000981;GO:0000981;GO:0000987;GO:0000987;GO:0001228;GO:0001228;GO:0001228;GO:0001822;GO:0001822;GO:0003091;GO:0003091;GO:0003682;GO:0003700;GO:0003700;GO:0003700;GO:0003700;GO:0005634;GO:0005634;GO:0005634;GO:0005634;GO:0005634;GO:0005634;GO:0006006;GO:0006006;GO:0006355;GO:…	K09176	-	K	18YC6;0UHTE;KOG3811;1CQV5;12NZG;1ATHI;0DERM;0V4DR;09TEJ	transcription factor AP-2 beta [Source:RGD Symbol;Acc:1306321]	301285	D4A505
ENSRNOG00000033235	113.89	43.8217	183.958	4.19786	2.06965	0.00271287	0.12828	1	80517411	80544825	-	1950	Relb	GO:0000785;GO:0000785;GO:0000978;GO:0000978;GO:0000978;GO:0000978;GO:0000981;GO:0003677;GO:0003677;GO:0003677;GO:0003677;GO:0003700;GO:0003700;GO:0005634;GO:0005634;GO:0005634;GO:0005634;GO:0005634;GO:0005634;GO:0005654;GO:0005737;GO:0005737;GO:0005813;GO:0005813;GO:0005829;GO:0005829;GO:0005829;GO:0006355;GO:0006355;GO:0006357;GO:0006357;GO:0006357;GO:0006954;GO:0007249;GO:0010628;GO:0010628;GO:…	K09253	-	K	0DJYW;1AWYK;0A0WR;0IFBK;13IH3;0UNAN;18TJS;1CYNR;0VD2C	RELB proto-oncogene, NF-kB subunit [Source:RGD Symbol;Acc:2321078]	100360982	-
ENSRNOG00000011774	55.6368	21.6095	89.6642	4.1493	2.05287	0.000248716	0.0365152	5	160122425	160158386	-	3009	Fblim1	GO:0001650;GO:0001725;GO:0001725;GO:0001725;GO:0003674;GO:0005575;GO:0005737;GO:0005737;GO:0005925;GO:0005925;GO:0008150;GO:0030054;GO:0031005;GO:0031005;GO:0031005;GO:0033623;GO:0033623;GO:0046872;GO:0071944;GO:0071944;GO:0098609;GO:0098609;GO:0098609;GO:0001725;GO:0001725;GO:0003674;GO:0005575;GO:0005737;GO:0005925;GO:0008150;GO:0031005;GO:0031005;GO:0033623;GO:0046872;GO:0071944;GO:0098609;GO:…	K24416	-	T	0VCJZ;18X65;1CYA8;KOG1701;0UPS3;1B3DZ;13JRW;0DPCC;0A1QC	filamin binding LIM protein 1 [Source:RGD Symbol;Acc:1359551]	362650	Q5U1Y3
ENSRNOG00000057092	218.774	85.2772	352.27	4.13088	2.04645	5.05881e-08	6.13971e-05	10	70411738	70435156	+	5269	Slfn4	GO:0009617;GO:0016020;GO:0016021;GO:0048286;GO:0009617;GO:0016020;GO:0016021;GO:0048286;	K24457	-	-	-	schlafen 4 [Source:RGD Symbol;Acc:620455]	114247	Q9TPX1
ENSRNOG00000008301	1020.77	399.733	1641.8	4.10724	2.03817	0.0044766	0.163312	13	90807199	90814119	-	1297	Tagln2	GO:0005515;GO:0030855;	K20526	-	Z	0VBM2;KOG2046;0DFF6;13HE5;09ZFN	transgelin 2 [Source:RGD Symbol;Acc:1310840]	304983	Q5XFX0
ENSRNOG00000006828	191.543	75.0149	308.072	4.10681	2.03802	0.000544618	0.055884	6	75793960	75874235	-	4566	Baz1a	GO:0000228;GO:0000228;GO:0003674;GO:0005515;GO:0005575;GO:0005634;GO:0006261;GO:0006261;GO:0006338;GO:0006338;GO:0008150;GO:0008623;GO:0008623;GO:0046872;	K11655	-	B	KOG1245;0DEJM;1B30Q;09T8F;130KW;0UGEB;1CP9I;18S1W;0V47E	bromodomain adjacent to zinc finger domain, 1A [Source:RGD Symbol;Acc:1306199]	314126	P22282
ENSRNOG00000019440	24.5378	9.63214	39.4434	4.09498	2.03386	0.00568735	0.182877	1	81230612	81245996	+	2186	Kcnn4	GO:0005267;GO:0005516;GO:0005516;GO:0005886;GO:0006811;GO:0006813;GO:0006813;GO:0006816;GO:0006884;GO:0015269;GO:0015269;GO:0015269;GO:0015269;GO:0016020;GO:0016021;GO:0016021;GO:0016021;GO:0016286;GO:0016286;GO:0019903;GO:0030322;GO:0031982;GO:0045332;GO:0046541;GO:0050714;GO:0050862;GO:0071805;GO:0005516;GO:0006813;GO:0015269;GO:0016021;GO:0016286;	K04945	-	P	1AU4E;134EP;0A2RA;18YQ2;0UPIH;1CVDQ;0VDM0;KOG3684;0DKJF	potassium calcium-activated channel subfamily N member 4 [Source:RGD Symbol;Acc:621476]	65206	A1A5N3
ENSRNOG00000038047	72.1491	28.3252	115.973	4.09434	2.03363	0.0279107	0.390016	17	78793336	78793724	+	389	Mt1	GO:0046872;GO:0046872;GO:0046872;	-	-	-	-	metallothionein 1 [Source:RGD Symbol;Acc:3117]	-	-
ENSRNOG00000003748	15.8695	6.23046	25.5085	4.09416	2.03357	0.0149097	0.294075	X	54390733	54409466	+	1558	RGD1565785	GO:0034121;GO:0034121;GO:0034157;GO:0034157;GO:0034161;GO:0034161;GO:0035751;GO:0035751;GO:0035751;GO:0036020;GO:0036020;GO:0045089;GO:0045089;	-	-	S	0IF09;1CPJ5;0V4HR;0UN0H;13NA4;1B2ST;18WN3;0DEVE;09TIT	similar to chromosome X open reading frame 21 [Source:RGD Symbol;Acc:1565785]	501570	D3ZRK2
ENSRNOG00000059140	22.7533	8.93656	36.5701	4.09219	2.03287	0.00414689	0.156924	14	86781202	86796378	-	3336	Myo1g	GO:0000146;GO:0000166;GO:0001891;GO:0001891;GO:0002456;GO:0002456;GO:0003774;GO:0003774;GO:0003774;GO:0003779;GO:0005516;GO:0005524;GO:0005524;GO:0005524;GO:0005546;GO:0005546;GO:0005547;GO:0005547;GO:0005654;GO:0005737;GO:0005886;GO:0005886;GO:0005886;GO:0005886;GO:0005902;GO:0005902;GO:0005902;GO:0006887;GO:0006887;GO:0006909;GO:0006909;GO:0007015;GO:0015629;GO:0016459;GO:0016459;GO:0016459;GO:…	K10356	-	-	-	myosin IG [Source:RGD Symbol;Acc:1306016]	289785	-
ENSRNOG00000038835	64.6445	25.4592	103.83	4.07828	2.02796	0.025397	0.374982	11	67082193	67118795	+	1855	Cd86	GO:0001878;GO:0002224;GO:0002309;GO:0002668;GO:0005102;GO:0006955;GO:0007166;GO:0007202;GO:0007568;GO:0009897;GO:0009897;GO:0009986;GO:0016020;GO:0016021;GO:0023035;GO:0031295;GO:0032496;GO:0034138;GO:0034341;GO:0042102;GO:0042102;GO:0042104;GO:0042113;GO:0042130;GO:0042493;GO:0043011;GO:0043231;GO:0051607;GO:0070062;GO:0071222;GO:0071222;GO:0071248;GO:0071345;GO:1901224;GO:1990051;	K05413	-	T	1CT9X;09ZXT;192M6;0IYP1;1AYZF;0V75E;0DMGS;13SM0;0UM3C	CD86 molecule [Source:RGD Symbol;Acc:628714]	56822	O35531
ENSRNOG00000000456	112.769	44.5431	180.995	4.06338	2.02268	0.000237747	0.0357701	20	3990613	3993769	+	2066	Psmb8	GO:0000502;GO:0000502;GO:0000502;GO:0000502;GO:0004298;GO:0004298;GO:0005634;GO:0005737;GO:0005839;GO:0005839;GO:0005839;GO:0006508;GO:0008233;GO:0016787;GO:0019882;GO:0045444;GO:0045444;GO:0051603;GO:0051603;GO:0052548;GO:1990111;	K02740	EC:3.4.25.1	O	0V6J5;KOG0175;12PAC;0UH93;0DGUM;18SWK;1AS2J;09VK0;1CRIR	proteasome 20S subunit beta 8 [Source:RGD Symbol;Acc:3426]	24968	P28064;A0A023IMI6
ENSRNOG00000032917	914.883	363.454	1466.31	4.03439	2.01235	0.000663912	0.0616659	12	17252093	17263477	+	3289	Zfand2a	GO:0000502;GO:0008270;GO:0032436;GO:0071243;GO:0008270;	K24685	-	S;T	0VDR8;KOG3183;0DQHX;12RE3;19369;0A2VU;1CZK2;1B5PH;0UV4A	zinc finger AN1-type containing 2A [Source:RGD Symbol;Acc:1310991]	360772	Q5U2P3
ENSRNOG00000021104	115.7	45.9921	185.408	4.0313	2.01125	0.00154576	0.0947492	1	101900733	101903910	-	729	Emp3	GO:0005886;GO:0008219;GO:0016020;GO:0016021;GO:0032060;	-	-	U	13RZU;0DRMF;0VEWW;0IY40;190TR;0A421;1D0UJ;1B1ZG;0URXX	epithelial membrane protein 3 [Source:RGD Symbol;Acc:621094]	81505	Q9QYW5
ENSRNOG00000024382	78.9408	31.4238	126.458	4.02426	2.00872	0.000266076	0.0372609	13	89385859	89396051	+	1342	Fcgr3a	GO:0003674;GO:0004888;GO:0005887;GO:0007166;GO:0009897;GO:0009986;GO:0009986;GO:0016020;GO:0016021;GO:0019767;GO:0019767;GO:0019770;GO:0019770;GO:0038094;GO:0038095;GO:0042060;GO:0042119;GO:0042119;GO:0045780;GO:0045780;GO:0050776;GO:0051930;GO:0071222;	K06463	-	T	1CT5P;0DIF5;0UH33;0V4JJ;18UCB;13I65;0IKYD;09X44;1AV4J	Fc fragment of IgG receptor IIIa [Source:RGD Symbol;Acc:1303067]	304966	Q6XPU4
ENSRNOG00000012630	747.014	297.521	1196.51	4.02159	2.00777	0.00404935	0.156515	2	207271853	207279314	+	1669	Rhoc	GO:0000281;GO:0003924;GO:0003924;GO:0003924;GO:0005525;GO:0005525;GO:0005525;GO:0005634;GO:0005634;GO:0005856;GO:0005886;GO:0005886;GO:0005886;GO:0005938;GO:0007015;GO:0007163;GO:0007264;GO:0007264;GO:0008360;GO:0016477;GO:0019901;GO:0030335;GO:0030865;GO:0031334;GO:0031334;GO:0031410;GO:0032154;GO:0032420;GO:0032420;GO:0032956;GO:0042995;GO:0043005;GO:0043231;GO:0043297;GO:0043297;GO:0051496;GO:…	K07857	-	Z	KOG0393	ras homolog family member C [Source:RGD Symbol;Acc:1304965]	295342	-
ENSRNOG00000043098	1513.31	603.455	2423.16	4.01549	2.00557	0.0168006	0.313161	19	11307967	11308740	-	382	Mt2A	GO:0005575;GO:0006882;GO:0007263;GO:0008270;GO:0009617;GO:0010273;GO:0036016;GO:0036018;GO:0046870;GO:0046872;GO:0046872;GO:0046872;GO:0048143;GO:0071294;	K14739	-	P	149A1;0UWX6;1943B;0DWP7;1B71X;0ABH5;1D5XW;0VNIF;0JFS1	metallothionein 2A [Source:RGD Symbol;Acc:1592345]	689415	P04355;B6ID08
ENSRNOG00000004854	48.6721	19.4166	77.9275	4.01344	2.00484	0.0108772	0.25758	7	96438046	96464049	-	4174	Has2	GO:0001570;GO:0005737;GO:0005887;GO:0005887;GO:0008284;GO:0030212;GO:0030213;GO:0030213;GO:0030213;GO:0030335;GO:0031410;GO:0036120;GO:0036302;GO:0044853;GO:0045226;GO:0050501;GO:0050501;GO:0050501;GO:0060349;GO:0071347;GO:0071356;GO:0071498;GO:0085029;GO:0090500;GO:1900625;	K00752	EC:2.4.1.212	M	KOG2571;12R3B	hyaluronan synthase 2 [Source:RGD Symbol;Acc:2781]	25694	O35776
ENSRNOG00000007338	867.072	346.652	1387.49	4.00255	2.00092	0.0001753	0.0319832	4	122835436	122895121	+	4309	Fbln2	GO:0005509;GO:0005509;GO:0005515;GO:0005576;GO:0005576;GO:0005576;GO:0010811;GO:0010811;GO:0010811;GO:0030198;GO:0030198;GO:0050840;GO:0050840;GO:0050840;GO:0062023;GO:0062023;	K17307	-	W;T	1BB58;197A8;13DX5;0B4ZX;0WHJJ;0E8MC;0IR7F;0V3BX;1DFJ4	fibulin 2 [Source:RGD Symbol;Acc:628685]	282583	G3V6X1
ENSRNOG00000048545	16.6878	6.67496	26.7006	4.00011	2.00004	0.0154413	0.2981	9	113814537	113846053	-	1227	LOC100910483	GO:0005515;	-	-	S	0A90F;0DKZ2;0J0MR;0VJX0;13W0G	ankyrin repeat domain-containing protein 12-like [Source:RGD Symbol;Acc:6498319]	-	-
ENSRNOG00000008450	12.5271	5.02534	20.0289	3.98558	1.99479	0.0292332	0.393553	19	25391700	25394229	+	2530	LOC100359539	GO:0004748;GO:0005829;GO:0009263;GO:0009263;GO:0009263;GO:0016491;GO:0016491;GO:0055114;	-	-	F	KOG1567;0UKWR;1AWB1;09XA5;12QEK;194YS;0V88G;0DKT0;1CVMU	ribonucleotide reductase M2 polypeptide [Source:RGD Symbol;Acc:2323655]	100359539	-
ENSRNOG00000030930	22.5404	9.07043	36.0103	3.97008	1.98917	0.00815552	0.22193	11	14253848	14304725	-	1440	Samsn1	GO:0001784;GO:0001784;GO:0001784;GO:0002820;GO:0002820;GO:0005515;GO:0005634;GO:0005634;GO:0005634;GO:0005634;GO:0005737;GO:0005829;GO:0005829;GO:0050732;GO:0050732;GO:0050732;GO:0050869;GO:0050869;GO:0050869;GO:0005515;	K23707	-	T	1CTEN;0UM98;1AVJG;12QFT;0V4V9;KOG4384;0DIPN;09XC7;18WJV	SAM domain, SH3 domain and nuclear localization signals, 1 [Source:RGD Symbol;Acc:620926]	170637	A0A0G2K960
ENSRNOG00000010666	89.5275	36.1326	142.922	3.9555	1.98386	0.0168596	0.313161	3	160207913	160219331	+	1805	Ccn5	GO:0005515;GO:0005520;GO:0005520;GO:0005576;GO:0005576;GO:0005576;GO:0005615;GO:0005634;GO:0007165;GO:0007165;	K23089	-	W	0UQBN;1ARH3;09ZPA;13QCA;18UM1;0DM73;0VAK1;1CW27;0IWPW	cellular communication network factor 5 [Source:RGD Symbol;Acc:621867]	29576	Q9JHC6
ENSRNOG00000008936	106.351	42.938	169.764	3.95371	1.98321	0.0165706	0.310997	5	151436464	151448328	+	4339	Map3k6	GO:0000165;GO:0000165;GO:0000166;GO:0000186;GO:0000287;GO:0000287;GO:0004672;GO:0004672;GO:0004672;GO:0004674;GO:0004709;GO:0004709;GO:0004709;GO:0004709;GO:0005524;GO:0005524;GO:0005524;GO:0005524;GO:0005524;GO:0006468;GO:0006468;GO:0006468;GO:0006468;GO:0016301;GO:0016310;GO:0046872;GO:0106310;GO:0106311;	K04425	EC:2.7.11.25	T	KOG4279;1CQKN;12T6E;0UHF1;1ASDF;0DFXB;0V9A0;18S5U;09X0J	mitogen-activated protein kinase kinase kinase 6 [Source:RGD Symbol;Acc:1304625]	313022	D3ZFL3
ENSRNOG00000016852	13.9395	5.63909	22.2399	3.94388	1.97962	0.0256189	0.376426	7	121109241	121128542	+	1961	Apobec3	GO:0003824;GO:0008270;GO:0016787;	K18750	EC:3.5.4.-	A;L	1B5F1;0V5M1;0JBA1;1CQKM;1437H;192YC;09UMG;0UHEZ;0DFX9	apolipoprotein B mRNA editing enzyme catalytic subunit 3 [Source:RGD Symbol;Acc:1307800]	315137	Q3T1K0
ENSRNOG00000016281	2352.27	951.622	3752.92	3.94371	1.97955	0.00649623	0.194717	16	83522162	83632153	+	6579	Col4a1	GO:0001569;GO:0001569;GO:0003674;GO:0005201;GO:0005201;GO:0005201;GO:0005201;GO:0005201;GO:0005575;GO:0005576;GO:0005581;GO:0005581;GO:0005581;GO:0005587;GO:0005587;GO:0005587;GO:0005604;GO:0005604;GO:0005604;GO:0005604;GO:0005615;GO:0007420;GO:0007420;GO:0007528;GO:0007528;GO:0016020;GO:0030020;GO:0030020;GO:0030198;GO:0030855;GO:0031012;GO:0038063;GO:0038063;GO:0048407;GO:0048407;GO:0048514;GO:…	K06237	-	W	18WJC;0UMXW;1ATZR;09U8F;0V57J;1CQ81;KOG3544;0DFDX;12N1R	collagen type IV alpha 1 chain [Source:RGD Symbol;Acc:1307148]	290905	F1MA59
ENSRNOG00000049943	18.9076	7.67927	30.1359	3.92432	1.97244	0.010074	0.249457	4	183401318	183426439	-	2928	Sinhcaf	GO:0008284;GO:0016580;GO:0016580;GO:0030336;GO:0030336;GO:0045596;GO:0008284;GO:0016580;GO:0016580;GO:0030336;GO:0030336;GO:0045596;	-	-	S	18SES;0UU7H;0A4K1;1D0IU;0VFF6;1B4AH;0IKPK;0DRD4;13HAE	SIN3-HDAC complex associated factor [Source:RGD Symbol;Acc:1595037]	686611	B4F781
ENSRNOG00000018488	26.2202	10.6718	41.7685	3.91391	1.96861	0.00347811	0.145064	3	161519743	161534704	+	1378	Cd40	GO:0001934;GO:0001934;GO:0002376;GO:0002637;GO:0002637;GO:0002768;GO:0002768;GO:0002768;GO:0003823;GO:0003823;GO:0005515;GO:0005615;GO:0005737;GO:0005886;GO:0005886;GO:0006874;GO:0006874;GO:0006874;GO:0006954;GO:0006954;GO:0009617;GO:0009897;GO:0009897;GO:0009897;GO:0009897;GO:0009897;GO:0009986;GO:0009986;GO:0016020;GO:0016021;GO:0019724;GO:0019899;GO:0019899;GO:0019904;GO:0023035;GO:0023035;GO:…	K03160	-	T	0VFS7;0A15X;19164;1D0E0;0IY0H;1B166;13SA9;0US0P;0DSBB	CD40 molecule [Source:RGD Symbol;Acc:619830]	171369	Q4QQW2
ENSRNOG00000019477	30.5519	12.4367	48.667	3.91317	1.96834	0.0491812	0.501313	10	57064482	57071096	+	2879	Zmynd15	GO:0005634;GO:0005634;GO:0005737;GO:0005737;GO:0007286;GO:0007286;GO:0007286;GO:0042826;GO:0042826;GO:0042826;GO:0042826;GO:0042826;GO:0045892;GO:0045892;GO:0045892;GO:0045892;GO:0045892;	K24081	-	K;B	1BAMR;0V2N2;0IMI3;0B33G;1970F;1DEGX;0E7FY;13AU5;0WFF1	zinc finger, MYND-type containing 15 [Source:RGD Symbol;Acc:1309845]	287457	D4A1E1
ENSRNOG00000029191	83.527	34.1893	132.865	3.88615	1.95834	0.000601783	0.0585854	2	248219428	248239899	+	1878	LOC685067	GO:0003924;GO:0005525;GO:0020005;GO:0031410;GO:0042832;GO:0044406;GO:0050830;GO:0071346;	-	-	S;O;T;D;C;K	191WI;0V9BC;134KU;09XSJ;1AYRV;KOG2037;1CUKV;0UNNF;0DJTQ	similar to guanylate binding protein family, member 6 [Source:RGD Symbol;Acc:1583235]	-	-
ENSRNOG00000016561	10.869	4.45613	17.2819	3.87823	1.9554	0.043449	0.477219	8	71514281	71526182	+	333	Pclaf	GO:0003682;GO:0005634;GO:0005813;GO:0006260;GO:0006974;GO:0006974;GO:0007098;GO:0009411;GO:0019985;GO:0048471;GO:0051726;GO:0051726;	-	-	L	0A8P6;13VMI;0UW08;1B6A6;0J101;193J7;0DV66;1D4GK;0VJM2	PCNA clamp associated factor [Source:RGD Symbol;Acc:1303041]	300795	Q6RIA2
ENSRNOG00000038722	27.6043	11.3227	43.8858	3.87591	1.95453	0.0030228	0.134548	14	45062662	45081991	+	2349	Tlr1	GO:0001775;GO:0002224;GO:0002755;GO:0004888;GO:0005515;GO:0005794;GO:0006952;GO:0006954;GO:0006955;GO:0007165;GO:0016021;GO:0032755;GO:0032757;GO:0032760;GO:0034130;GO:0034137;GO:0035354;GO:0035663;GO:0042116;GO:0042495;GO:0042495;GO:0042802;GO:0045121;GO:0071727;	-	-	T	0UGQQ;1CT9T;09X7S;195KZ;1B3AP;13HS3;0DIJ8;0V86D;KOG4641	toll-like receptor 1 [Source:RGD Symbol;Acc:1309975]	-	-
ENSRNOG00000054954	20.3542	8.36008	32.3483	3.86938	1.9521	0.0350303	0.430197	1	63734135	63741982	+	2630	Lilrb2	-	K06512	-	-	-	leukocyte immunoglobulin like receptor B2 [Source:RGD Symbol;Acc:70895]	65146	D3ZQX2;A0A140TAJ6
ENSRNOG00000012956	1147.43	471.913	1822.96	3.86291	1.94969	0.00624568	0.192652	3	154597168	154627257	-	3506	Tgm2	GO:0000166;GO:0000785;GO:0000785;GO:0001974;GO:0003810;GO:0003810;GO:0003810;GO:0003810;GO:0003810;GO:0003810;GO:0003810;GO:0003810;GO:0005509;GO:0005509;GO:0005515;GO:0005525;GO:0005525;GO:0005525;GO:0005576;GO:0005634;GO:0005634;GO:0005694;GO:0005737;GO:0005737;GO:0005739;GO:0005739;GO:0005739;GO:0005739;GO:0005783;GO:0005829;GO:0005829;GO:0005886;GO:0005886;GO:0005886;GO:0006508;GO:0007200;GO:…	K05625	EC:2.3.2.13	O;T	18UI9;0V54T;12WTW;0IFMV;0UGRC;09U5T;1CQ55;0DFFC;1AXCB	transglutaminase 2 [Source:RGD Symbol;Acc:621081]	56083	Q9WVJ6
ENSRNOG00000015156	89.4572	36.9065	142.008	3.84778	1.94403	0.00080272	0.0688385	1	218652917	218657925	-	844	Gal	GO:0001664;GO:0004966;GO:0004966;GO:0004966;GO:0005179;GO:0005179;GO:0005179;GO:0005184;GO:0005184;GO:0005184;GO:0005184;GO:0005576;GO:0005576;GO:0005576;GO:0005615;GO:0005615;GO:0005615;GO:0005737;GO:0005794;GO:0006954;GO:0007218;GO:0007218;GO:0007218;GO:0007399;GO:0007631;GO:0008285;GO:0010737;GO:0010737;GO:0019933;GO:0019933;GO:0030141;GO:0030141;GO:0031763;GO:0031764;GO:0031764;GO:0031764;GO:…	K05244	-	W;T	13SP2;0VK86;0A9GV;1B6FH;193RX;0UWA1;0DV69;0IZPR;1D4GN	galanin and GMAP prepropeptide [Source:RGD Symbol;Acc:61954]	29141	P10683
ENSRNOG00000025764	269.908	111.573	428.243	3.83822	1.94044	0.0154957	0.298833	19	11302125	11302938	-	348	AC128848.1	GO:0005634;GO:0005737;GO:0006882;GO:0010273;GO:0046872;GO:0046872;GO:0046872;GO:0046872;GO:0071276;GO:0071280;GO:0071294;	-	-	-	-	-	-	-
ENSRNOG00000047800	65.3458	27.0177	103.674	3.83725	1.94007	0.0107618	0.256867	1	78186776	78195328	-	1950	C5ar1	GO:0001774;GO:0001856;GO:0002430;GO:0004875;GO:0004875;GO:0004875;GO:0004878;GO:0004878;GO:0004878;GO:0004878;GO:0004878;GO:0004930;GO:0004930;GO:0004930;GO:0004930;GO:0004930;GO:0004930;GO:0005886;GO:0005886;GO:0005886;GO:0006915;GO:0006935;GO:0006935;GO:0006935;GO:0006954;GO:0006954;GO:0007165;GO:0007186;GO:0007186;GO:0007186;GO:0007200;GO:0007204;GO:0007204;GO:0009986;GO:0010575;GO:0010759;GO:…	K04010	-	T;V	12Q2R;0IF0K;1AV8R;1CSRE;0V7PH;0DI0R;0UPIB;18W9V;09WR1	complement C5a receptor 1 [Source:RGD Symbol;Acc:70553]	113959	P97520
ENSRNOG00000014845	29.8379	12.3586	47.3172	3.82869	1.93685	0.0126503	0.276095	3	113324698	113342675	-	5430	Strc	GO:0032426;GO:0050910;GO:0060088;GO:0060091;	K24636	-	S	1DENN;0V2RP;0IN9X;0B3EW;13BF6;0WFTY;0E7NE	stereocilin [Source:RGD Symbol;Acc:1593345]	691937	-
ENSRNOG00000022565	29.7744	12.366	47.1828	3.81553	1.93188	0.040959	0.465455	16	20558222	20562399	-	2346	Lrrc25	GO:0005515;GO:0016020;GO:0016021;	-	-	S	193A4;09XMN;0DIZ9;1AX49;0V8JB;140V3;0UMMP;0J965;1CTQP	leucine rich repeat containing 25 [Source:RGD Symbol;Acc:1564818]	498605	F1M277
ENSRNOG00000007545	498.293	207.489	789.096	3.80307	1.92717	0.00135316	0.0889325	7	18627808	18634079	-	1888	Angptl4	GO:0001525;GO:0001525;GO:0001525;GO:0001666;GO:0004857;GO:0004857;GO:0004857;GO:0005102;GO:0005576;GO:0005576;GO:0005576;GO:0005576;GO:0005615;GO:0005615;GO:0005615;GO:0005615;GO:0005615;GO:0005615;GO:0006629;GO:0019216;GO:0042802;GO:0042802;GO:0043066;GO:0043066;GO:0043066;GO:0043066;GO:0043066;GO:0043086;GO:0043335;GO:0043335;GO:0051005;GO:0051005;GO:0051005;GO:0062023;GO:0070328;GO:0070328;GO:…	K08767	-	S;W;E	18W2C;0DHPK;0VDSJ;1CZMH;1AZPH;0UI82;KOG2579;0A2XA;13K55	angiopoietin-like 4 [Source:RGD Symbol;Acc:735058]	362850	Q6TMA8
ENSRNOG00000014258	112.893	47.2436	178.542	3.77917	1.91807	0.00023546	0.0357212	1	4637491	4653210	-	3231	Rab32	GO:0000166;GO:0003924;GO:0003924;GO:0003924;GO:0003924;GO:0003924;GO:0005525;GO:0005525;GO:0005525;GO:0005739;GO:0005739;GO:0005741;GO:0005769;GO:0005783;GO:0005794;GO:0005794;GO:0005802;GO:0005802;GO:0005802;GO:0005802;GO:0006886;GO:0007005;GO:0012505;GO:0016020;GO:0016020;GO:0016192;GO:0016192;GO:0019882;GO:0030742;GO:0031982;GO:0031982;GO:0032438;GO:0033162;GO:0035646;GO:0035650;GO:0035651;GO:…	K07918	-	U	0UK7T;1CX4D;0DMV7;12SMZ;0VB4K;KOG4423;1915B;0A08N;1ATT3	RAB32, member RAS oncogene family [Source:RGD Symbol;Acc:1559997]	365042	D4AEG2
ENSRNOG00000021919	210.049	88.2848	331.814	3.75845	1.91014	0.00568965	0.182877	6	98284170	98367756	+	2678	Rhoj	GO:0003924;GO:0003924;GO:0003924;GO:0003924;GO:0003924;GO:0005525;GO:0005525;GO:0005525;GO:0005525;GO:0005525;GO:0005886;GO:0005886;GO:0006897;GO:0007264;GO:0007264;GO:0007266;GO:0007266;GO:0008360;GO:0008360;GO:0010594;GO:0010594;GO:0016477;GO:0030031;GO:0030036;GO:0030036;GO:0030036;GO:0032488;GO:0061299;GO:0061299;GO:0090050;GO:0090050;GO:1903670;GO:1903670;	K07864	-	Z;S	0A0Z1;1B1Z0;12T91;0DNK8;18XN4;0VBVE;KOG0393;0URXF;1CXHD	ras homolog family member J [Source:RGD Symbol;Acc:1310528]	299145	Q5RJS2
ENSRNOG00000002159	277.632	116.742	438.522	3.75634	1.90933	2.61678e-07	0.000207124	14	10343282	10395047	-	3048	Gpat3	GO:0003841;GO:0005783;GO:0005783;GO:0005789;GO:0006072;GO:0008654;GO:0016746;GO:0019432;GO:0019432;GO:0032006;	K13506	EC:2.3.1.15	I	1ATY2;0V5QH;0DG0R;12PYI;KOG2898;18SVM;09UQX;0UIE5;1CQQB	glycerol-3-phosphate acyltransferase 3 [Source:RGD Symbol;Acc:1565703]	305166	Q4V8J4
ENSRNOG00000009131	60.4022	25.4092	95.3952	3.75435	1.90856	0.0252307	0.374658	5	143111074	143120165	-	2846	Zc3h12a	GO:0000294;GO:0000932;GO:0001933;GO:0002230;GO:0002757;GO:0003677;GO:0003682;GO:0003723;GO:0003729;GO:0003730;GO:0004518;GO:0004521;GO:0004532;GO:0004540;GO:0004843;GO:0005634;GO:0005634;GO:0005654;GO:0005737;GO:0005737;GO:0005791;GO:0005856;GO:0006974;GO:0010468;GO:0010508;GO:0010508;GO:0010595;GO:0010628;GO:0010629;GO:0010629;GO:0010656;GO:0010884;GO:0010884;GO:0010942;GO:0016579;GO:0032088;GO:…	K18668	EC:3.1.-.-	S;K	0UP7I;0DKIW;12RNG;KOG3777;1AYSW;09VCG;18WD5;0V6BM;1CVD0	zinc finger CCCH type containing 12A [Source:RGD Symbol;Acc:1306776]	313587	A0JPN4
ENSRNOG00000014948	46.6824	19.6643	73.7004	3.74792	1.90609	0.0223393	0.354618	19	52077109	52085496	+	2206	Osgin1	GO:0007165;GO:0008083;GO:0008083;GO:0008083;GO:0030308;GO:0030308;GO:0030308;GO:0030308;GO:0030308;GO:0030334;GO:0030334;GO:0042127;GO:0042127;GO:0042981;GO:0042981;GO:0043065;GO:0043065;GO:0007165;GO:0008083;GO:0008083;GO:0030308;GO:0030308;GO:0030308;GO:0030308;GO:0030334;GO:0042127;GO:0042981;GO:0043065;GO:0043065;	-	-	T	0DHDJ;12QIZ;18V9P;09W4G;0UQ2D;0V72U;0IF6I;1B0M1;1CS3T	oxidative stress induced growth inhibitor 1 [Source:RGD Symbol;Acc:620679]	171493	Q8R430
ENSRNOG00000003806	13.2344	5.59823	20.8706	3.72806	1.89843	0.0345758	0.427596	6	122254841	122256251	+	1411	Gpr65	GO:0004930;GO:0004930;GO:0004930;GO:0004930;GO:0004930;GO:0004930;GO:0005886;GO:0005886;GO:0005887;GO:0007165;GO:0007186;GO:0007186;GO:0007186;GO:0007186;GO:0007186;GO:0007189;GO:0007189;GO:0010447;GO:0010447;GO:0016020;GO:0016021;GO:0016021;GO:0016021;GO:0031532;GO:0031532;GO:0035025;GO:0051482;GO:0051496;GO:0051496;GO:0090630;GO:0090630;	K08416	-	T	KOG3656;1CQTQ;0V5U9;0DG44;09UUS;1ATBP;0UHR9;18W58;13KHK	G-protein coupled receptor 65 [Source:RGD Symbol;Acc:1311832]	299242	B0YIR8
ENSRNOG00000004972	314.429	133.726	495.133	3.70259	1.88853	0.00023376	0.0357212	14	89314176	89334276	+	2038	Upp1	GO:0003824;GO:0003824;GO:0004850;GO:0004850;GO:0004850;GO:0004850;GO:0004850;GO:0004850;GO:0004850;GO:0005654;GO:0005737;GO:0005737;GO:0005829;GO:0005829;GO:0006218;GO:0006218;GO:0006218;GO:0006220;GO:0006220;GO:0006248;GO:0006248;GO:0006249;GO:0006249;GO:0009032;GO:0009032;GO:0009116;GO:0009116;GO:0009166;GO:0009166;GO:0016740;GO:0016757;GO:0016763;GO:0016763;GO:0042149;GO:0042802;GO:0042802;GO:…	K00757	EC:2.4.2.3	F	09UGA;18V8D;0UI8B;KOG3728;12PTT;0DFS2;1CQFK;0V5FN;1ATT2	uridine phosphorylase 1 [Source:RGD Symbol;Acc:1305566]	289801	Q499V1
ENSRNOG00000000529	90.5746	38.6959	142.453	3.68135	1.88024	0.0117945	0.265304	20	8165307	8169555	+	1299	Pim1	GO:0004672;GO:0004674;GO:0004674;GO:0004674;GO:0005524;GO:0005524;GO:0005524;GO:0005634;GO:0005730;GO:0005737;GO:0005829;GO:0006468;GO:0006468;GO:0006468;GO:0008134;GO:0022898;GO:0030145;GO:0030145;GO:0043024;GO:0043066;GO:0043066;GO:0043433;GO:0045893;GO:0046777;GO:0050821;GO:0060045;GO:0070561;GO:0090336;GO:1902033;GO:1905062;GO:1990748;	K04702	EC:2.7.11.1	T;B	KOG0583;09THD;0UFXZ;1ATEZ;0DEU7;0V4GC;1958A;12UDI;1CPHY	Pim-1 proto-oncogene, serine/threonine kinase [Source:RGD Symbol;Acc:3330]	24649	P26794
ENSRNOG00000015496	1023.25	439.595	1606.9	3.65542	1.87004	0.0141098	0.288549	16	19385736	19399903	-	1051	Tpm4	GO:0001725;GO:0002102;GO:0005737;GO:0030863;GO:0051015;GO:0003779;GO:0005856;	K10375	-	Z	0V7TQ;KOG1003;0UMIG;0DJ35;09XR3;1CTUZ;12RF9	tropomyosin 4 [Source:RGD Symbol;Acc:3899]	24852	P09495
ENSRNOG00000021644	59.1182	25.4167	92.8198	3.65192	1.86865	0.0123426	0.27072	1	226897625	226912708	+	2251	Slc15a3	GO:0005765;GO:0006857;GO:0010008;GO:0015647;GO:0015835;GO:0016020;GO:0022857;GO:0043231;GO:0055085;GO:0070434;GO:0071916;GO:0140206;	K14638	-	P;E	0DJYU;1AZVC;09XYR;18YTV;12QTM;KOG1237;0V5WI;1CUSI;0UG9S	solute carrier family 15 member 3 [Source:RGD Symbol;Acc:628663]	246239	Q924V4
ENSRNOG00000019728	660.353	284.45	1036.26	3.64302	1.86513	2.65252e-06	0.00117779	1	199495298	199623960	+	7433	Itgam	GO:0005615;GO:0005886;GO:0007155;GO:0008305;GO:0009986;GO:0010668;GO:0031072;GO:0032930;GO:0043315;GO:0044853;GO:0001774;GO:0001781;GO:0001846;GO:0001851;GO:0002523;GO:0005615;GO:0005634;GO:0005886;GO:0006898;GO:0006909;GO:0006911;GO:0007155;GO:0007155;GO:0007155;GO:0007155;GO:0007159;GO:0007229;GO:0008201;GO:0008305;GO:0008305;GO:0009897;GO:0009986;GO:0010668;GO:0014005;GO:0016020;GO:0016021;GO:…	K06461	-	W	1DEZI;0WGDS;1974J;0B3YP;0V2Z3;1BAVT;13CB3;0E803;0IPBA	integrin subunit alpha M [Source:RGD Symbol;Acc:2926]	25021	Q9JI30
ENSRNOG00000000991	800.311	345.095	1255.53	3.63822	1.86323	0.00969844	0.24654	12	11252296	11265865	-	1516	Arpc1b	GO:0003779;GO:0005200;GO:0005200;GO:0005515;GO:0005634;GO:0005737;GO:0005856;GO:0005885;GO:0005885;GO:0005885;GO:0005885;GO:0005885;GO:0015629;GO:0015629;GO:0030833;GO:0030833;GO:0032355;GO:0034314;GO:0034314;GO:0034314;GO:0034314;GO:0034314;GO:0036284;GO:0043627;GO:0044877;GO:0051015;GO:0051015;GO:0051015;	K05757	-	Z	1CREG;0V6EZ;12PA7;1923K;0DGQK;0UPIE;09VFT;1B2HZ;KOG1523	actin related protein 2/3 complex, subunit 1B [Source:RGD Symbol;Acc:2155]	54227	O88656
ENSRNOG00000016166	187.016	80.665	293.367	3.63686	1.86269	0.00521579	0.177036	1	259308296	259357056	-	1471	Pdlim1	GO:0001725;GO:0003713;GO:0005515;GO:0005667;GO:0005737;GO:0005856;GO:0005856;GO:0006357;GO:0030018;	K23353	-	Z;T	1AU0J;0V87K;KOG1703;13CT0;1CTB9;0UM5E;195TH;09X91;0DIKF	PDZ and LIM domain 1 [Source:RGD Symbol;Acc:68324]	54133	P52944
ENSRNOG00000010549	178.471	77.168	279.774	3.62551	1.85818	0.0192461	0.329609	7	124460358	124470609	+	839	Tspo	GO:0005739;GO:0005739;GO:0005829;GO:0010823;GO:0016021;GO:0031397;GO:0043231;GO:0044325;GO:0072655;GO:0072656;GO:1903147;GO:1903579;GO:2000379;	K05770	-	T	0A546;0UU38;1D1P1;0DSDD;18WAK;1ASWD;KOG3797;13R5P;0VFZI	translocator protein [Source:RGD Symbol;Acc:2228]	24230	P16257
ENSRNOG00000014357	84.1039	36.4026	131.805	3.62076	1.85629	0.0134057	0.283122	5	145374690	145377221	-	1588	Gja4	GO:0001568;GO:0001568;GO:0003158;GO:0005243;GO:0005886;GO:0005921;GO:0005921;GO:0005922;GO:0005922;GO:0005922;GO:0005922;GO:0006816;GO:0007154;GO:0007154;GO:0007154;GO:0007267;GO:0007267;GO:0016020;GO:0016021;GO:0030054;GO:0048265;GO:0055085;	K07613	-	T;P	13J4J;0UM96;18T9F;0IF97;09WA4;1B4AM;1CUUB;0V9HT;0DK0B	gap junction protein, alpha 4 [Source:RGD Symbol;Acc:2691]	25655	Q03190;A0A654IEV1
ENSRNOG00000056786	404.797	175.759	633.835	3.60628	1.85051	0.00481243	0.170117	19	55305496	55367353	-	8203	Piezo1	GO:0005783;GO:0008381;GO:0010831;GO:0016021;GO:0033625;GO:0033634;	K22128	-	-	-	piezo-type mechanosensitive ion channel component 1 [Source:RGD Symbol;Acc:1308822]	361430	Q0KL00
ENSRNOG00000015441	528.803	230.102	827.504	3.59624	1.84649	0.00149144	0.0938501	1	196942364	196967220	+	3561	Il4r	GO:0002532;GO:0002532;GO:0002639;GO:0003674;GO:0004896;GO:0004896;GO:0005515;GO:0005576;GO:0005615;GO:0005886;GO:0006954;GO:0006955;GO:0016020;GO:0016020;GO:0016020;GO:0016021;GO:0016021;GO:0016021;GO:0016064;GO:0019221;GO:0030728;GO:0032722;GO:0042127;GO:0042832;GO:0043032;GO:0043235;GO:0043306;GO:0043627;GO:0044877;GO:0045626;GO:0045630;GO:0120162;GO:0120162;GO:1901741;GO:1990834;GO:0002532;GO:…	K05071	-	W;T	0VAMV;1CW4H;12S81;0UQEC;0IGBQ;09ZRD;0DG63;1ASCG;18VWB	interleukin 4 receptor [Source:RGD Symbol;Acc:2899]	25084	Q63257
ENSRNOG00000015906	115.046	50.6155	179.478	3.5459	1.82615	0.0223695	0.354618	9	119181083	119190698	-	1385	Tgif1	GO:0000122;GO:0000122;GO:0000978;GO:0000978;GO:0000978;GO:0000981;GO:0001227;GO:0001227;GO:0001843;GO:0003677;GO:0003677;GO:0003677;GO:0003682;GO:0005634;GO:0005634;GO:0005654;GO:0006355;GO:0006355;GO:0006357;GO:0007368;GO:0008285;GO:0009953;GO:0010470;GO:0010629;GO:0038092;GO:0042493;GO:0045666;GO:0048146;GO:0048387;GO:0060041;GO:0070410;GO:0071363;GO:1990837;GO:1990837;	K19383	-	K	KOG0773;0DN2E;0UPK2;0V949;1CWYS;1AZ7W;12TDE;0A13G;18YBG	TGFB-induced factor homeobox 1 [Source:RGD Symbol;Acc:1310517]	316742	Q5BJZ9
ENSRNOG00000004273	134.661	59.3137	210.008	3.54062	1.824	0.0373965	0.445552	1	213766758	213767815	+	568	Ifitm1	GO:0016021;	K19831	-	S	13XNX;0VJSA;1D4IR;0A8GR;0DV1U;0J2DU	interferon induced transmembrane protein 1 [Source:RGD Symbol;Acc:1307601]	293618	-
ENSRNOG00000048478	68.7713	30.3209	107.222	3.53622	1.82221	0.00143714	0.0921514	9	84689150	84690338	+	629	Kcne4	GO:0003674;GO:0005249;GO:0005249;GO:0005251;GO:0006811;GO:0006811;GO:0008076;GO:0008150;GO:0015459;GO:0016020;GO:0016020;GO:0016020;GO:0016021;GO:0016324;GO:0044325;GO:0044325;GO:0044325;GO:0060307;GO:0086005;GO:0086011;GO:0086091;GO:0097623;GO:0098915;GO:1902260;GO:1902282;	K04898	-	P	0DSUW;18TV3;0A1WE;0UTWB;1CYPP;0IWSX;0VG7B;1B2H0;13QQA	potassium voltage-gated channel subfamily E regulatory subunit 4 [Source:RGD Symbol;Acc:1302957]	367302	Q71FD8
ENSRNOG00000019549	2697.37	1194.09	4200.64	3.51786	1.8147	0.0448687	0.481749	1	40816107	40906581	+	6589	Akap12	GO:0005516;GO:0005516;GO:0005516;GO:0005737;GO:0005737;GO:0005829;GO:0005856;GO:0005886;GO:0007165;GO:0007193;GO:0007193;GO:0008179;GO:0008179;GO:0010738;GO:0010738;GO:0010739;GO:0010739;GO:0016020;GO:0032496;GO:0032760;GO:0035733;GO:0043025;GO:0043116;GO:0050804;GO:0050804;GO:0051018;GO:0051018;GO:0051602;GO:0051770;GO:0061870;GO:0070374;GO:0071347;GO:0071356;GO:0090036;GO:0090036;GO:0098685;GO:…	K16528	-	T;U	0UQDR;1922N;0V8I3;1CTPA;12QKQ;1B2T3;0DIXV;09XK5;0IFC9	A-kinase anchoring protein 12 [Source:RGD Symbol;Acc:70988]	83425	Q5QD51
ENSRNOG00000014061	129.661	57.4784	201.844	3.51166	1.81215	0.00016944	0.0319832	1	274245184	274258595	+	2419	Dusp5	GO:0000188;GO:0004721;GO:0004722;GO:0004725;GO:0004725;GO:0004725;GO:0004725;GO:0005634;GO:0006470;GO:0006470;GO:0008138;GO:0008138;GO:0008138;GO:0016311;GO:0016311;GO:0016311;GO:0016787;GO:0016791;GO:0016791;GO:0016791;GO:0017017;GO:0017017;GO:0035335;GO:0035970;GO:0106306;GO:0106306;GO:0106307;GO:0106307;	K04459	-	V	0DPDW;13MS0;0VCMA;0UKGT;18UUA;0A1RP;1AXUN;1CYBQ;KOG1716	dual specificity phosphatase 5 [Source:RGD Symbol;Acc:620854]	171109	O54838
ENSRNOG00000007541	75.186	33.4641	116.908	3.49352	1.80468	0.00858883	0.229871	5	142689026	142696383	+	1673	Fhl3	GO:0001725;GO:0001725;GO:0001725;GO:0003712;GO:0003779;GO:0003779;GO:0003779;GO:0005634;GO:0005634;GO:0005634;GO:0030018;GO:0030018;GO:0030018;GO:0030036;GO:0030036;GO:0030036;GO:0046872;	K24414	-	Z;T	KOG1704;12QMN;1AY5M;09VZI;1CRYF;0UHJ7;0DH8A;19206;0V6XY	four and a half LIM domains 3 [Source:RGD Symbol;Acc:1307180]	313582	D3ZPF0
ENSRNOG00000015599	37.7642	16.8538	58.6745	3.48138	1.79966	0.0473457	0.493942	3	120272583	120306551	-	1778	Mall	GO:0000139;GO:0000139;GO:0005886;GO:0005886;GO:0016020;GO:0016020;GO:0016020;GO:0016021;GO:0016021;GO:0019911;GO:0030136;GO:0030136;GO:0031410;GO:0031410;GO:0042552;GO:0045121;GO:0045121;	-	-	U	0DTW1;1B5RN;13SCZ;1D2XZ;1939F;0A70B;0VHUB;0UV6F;0IWII	mal, T-cell differentiation protein-like [Source:RGD Symbol;Acc:1310869]	362211	Q5EB48
ENSRNOG00000054437	62.192	27.7636	96.6205	3.48011	1.79913	0.00629649	0.192652	14	108491069	108509892	-	1770	Rel	GO:0000978;GO:0001228;GO:0003677;GO:0003700;GO:0005634;GO:0005737;GO:0006355;GO:0007249;GO:0010629;GO:0032688;GO:0043123;GO:0045893;GO:0045944;	K09254	-	-	-	REL proto-oncogene, NF-kB subunit [Source:RGD Symbol;Acc:1311231]	305584	-
ENSRNOG00000048430	19.8104	8.87141	30.7493	3.46612	1.79332	0.0156385	0.300729	12	49761120	49979758	+	8363	Myo18b	GO:0000166;GO:0001570;GO:0001570;GO:0001701;GO:0001701;GO:0003774;GO:0003774;GO:0003774;GO:0003779;GO:0005515;GO:0005524;GO:0005524;GO:0005524;GO:0016459;GO:0016459;GO:0016459;GO:0016461;GO:0016461;GO:0030018;GO:0030018;GO:0031941;GO:0031941;GO:0048739;GO:0048739;	K10362	-	Z	09TM6;1AXV3;0UIRN;0DGUS;0V4K6;194ZA;KOG0161;1CRIW;12N9X	myosin XVIIIb [Source:RGD Symbol;Acc:1594542]	304551	M0R6Z9
ENSRNOG00000045829	187.717	84.1225	291.312	3.46295	1.792	0.0253219	0.374785	3	109862117	109873466	+	3655	Thbs1	GO:0000187;GO:0001786;GO:0001937;GO:0001953;GO:0001968;GO:0002040;GO:0002544;GO:0002581;GO:0002605;GO:0005178;GO:0005509;GO:0005515;GO:0005576;GO:0005577;GO:0005615;GO:0005615;GO:0006954;GO:0006954;GO:0006955;GO:0007050;GO:0007155;GO:0008201;GO:0008201;GO:0008284;GO:0009749;GO:0009897;GO:0009986;GO:0010595;GO:0010596;GO:0010748;GO:0010751;GO:0010754;GO:0010757;GO:0010763;GO:0016477;GO:0016525;GO:…	-	-	-	-	thrombospondin 1 [Source:RGD Symbol;Acc:1588455]	-	-
ENSRNOG00000033693	44.8137	20.101	69.5264	3.45885	1.79029	0.000839185	0.0688385	2	30376419	30458542	-	6127	Naip2	GO:0005524;GO:0006915;GO:0006954;GO:0006954;GO:0016045;GO:0016045;GO:0042742;GO:0042742;GO:0043027;GO:0043027;GO:0043027;GO:0043066;GO:0043066;GO:0043154;GO:0070269;GO:0070269;GO:0071391;GO:0072557;GO:0072557;	-	-	-	-	NLR family, apoptosis inhibitory protein 2 [Source:MGI Symbol;Acc:MGI:1298226]	-	-
ENSRNOG00000005214	183.263	82.4448	284.081	3.44571	1.7848	0.00136387	0.0893138	14	100151210	100217913	-	2155	Plek	GO:0035556;GO:0035556;GO:0002244;GO:0002576;GO:0005080;GO:0005737;GO:0006904;GO:0007229;GO:0010572;GO:0010920;GO:0010925;GO:0030030;GO:0030836;GO:0030836;GO:0030845;GO:0030866;GO:0031529;GO:0031532;GO:0032233;GO:0032587;GO:0033625;GO:0035556;GO:0042803;GO:0043325;GO:0045744;GO:0046488;GO:0060305;GO:0070493;GO:0070493;GO:0070527;GO:0070528;GO:0070560;	K19993	-	T	0IFJ7;09XEV;13HUJ;1CTS2;1AS31;18SWX;0V8KH;0DJ0K;0UG9Y	pleckstrin [Source:RGD Symbol;Acc:1308269]	364206	Q4KM33
ENSRNOG00000039048	38.0522	17.1868	58.9175	3.42806	1.77739	0.00185809	0.105378	11	60848131	60882379	-	2526	Cd200r1	GO:0038023;GO:0150077;	K21668	-	T	0IUJX;09UBR;13MZY;0VCDX;0DHSW;0USYY;1930G;1CWFP;1B5B2	CD200 receptor 1 [Source:RGD Symbol;Acc:61837]	64357	Q9ES58
ENSRNOG00000009656	30.4588	13.7944	47.1233	3.41611	1.77235	0.0367645	0.441489	5	142986526	143007831	+	1705	Rspo1	GO:0001664;GO:0001664;GO:0001664;GO:0001664;GO:0001934;GO:0001934;GO:0002090;GO:0002090;GO:0003674;GO:0005102;GO:0005102;GO:0005575;GO:0005615;GO:0005634;GO:0007140;GO:0008150;GO:0008201;GO:0008201;GO:0010468;GO:0016055;GO:0030177;GO:0030177;GO:0030177;GO:0030177;GO:0050896;GO:0060070;GO:0090263;GO:0090263;GO:2000052;GO:2000254;	K19471	-	O;W	1AV0A;0UKJG;0VANP;18YP7;KOG3525;0A3XT;0DRJ1;12RPG;1CVDI	R-spondin 1 [Source:RGD Symbol;Acc:1565558]	313589	D3ZBD1
ENSRNOG00000019283	74.1399	33.5961	114.684	3.4136	1.77129	0.000543144	0.055884	1	166031272	166037424	-	1743	P2ry2	GO:0004930;GO:0004930;GO:0004930;GO:0005886;GO:0007165;GO:0007186;GO:0007186;GO:0007186;GO:0007200;GO:0007200;GO:0016020;GO:0016021;GO:0016021;GO:0016021;GO:0035589;GO:0045028;GO:0045028;GO:0070257;GO:0070257;GO:0097746;GO:0097746;	K04269	-	T	1B4D4;0DQE8;18SUJ;0IIAQ;0VA7A;1CZG5;0UU5Q;09ZC8;12RKR	purinergic receptor P2Y2 [Source:RGD Symbol;Acc:62088]	29597	P41232
ENSRNOG00000010833	156.096	70.7871	241.404	3.41029	1.76989	6.34395e-06	0.00235697	4	115004448	115015965	-	2061	Mthfd2	GO:0000287;GO:0000287;GO:0003674;GO:0003824;GO:0003824;GO:0004477;GO:0004477;GO:0004477;GO:0004487;GO:0004487;GO:0004487;GO:0004488;GO:0004488;GO:0004488;GO:0004488;GO:0004488;GO:0005575;GO:0005739;GO:0005739;GO:0006730;GO:0008150;GO:0016787;GO:0035999;GO:0042301;GO:0042301;GO:0046653;GO:0046653;GO:0055114;	K13403	-	H	18UDZ;KOG0089;1AUTU;0DKXC;0APE9;1CVSJ;0W1R2;12RHN;0UG7R	methylenetetrahydrofolate dehydrogenase (NADP+ dependent) 2, methenyltetrahydrofolate cyclohydrolase [Source:RGD Symbol;Acc:1311313]	680308	D4A1Y5
ENSRNOG00000001224	333.664	152.228	515.099	3.38373	1.75861	6.23176e-05	0.0147337	20	11777783	11815647	-	3151	Itgb2	GO:0001540;GO:0001540;GO:0001851;GO:0002523;GO:0005178;GO:0005886;GO:0005925;GO:0006898;GO:0006909;GO:0006911;GO:0007155;GO:0007155;GO:0007155;GO:0007155;GO:0007159;GO:0007160;GO:0007160;GO:0007160;GO:0007160;GO:0007229;GO:0007229;GO:0007229;GO:0007229;GO:0007229;GO:0007568;GO:0008305;GO:0008305;GO:0009897;GO:0009986;GO:0016020;GO:0016020;GO:0016021;GO:0016477;GO:0019901;GO:0030101;GO:0030369;GO:…	K06464	-	W	0DG9T;1CUIS;0V602;18TZE;09V0A;1AVA6;12SZY;KOG1226;0UJTE	integrin subunit beta 2 [Source:RGD Symbol;Acc:1305581]	309684	B2RYB8
ENSRNOG00000016112	113.056	51.6721	174.44	3.3759	1.75527	0.0342899	0.425579	1	247519939	247537943	+	1941	Cd274	GO:0002845;GO:0002845;GO:0005654;GO:0005886;GO:0005886;GO:0006955;GO:0006955;GO:0006955;GO:0007165;GO:0007165;GO:0007166;GO:0007166;GO:0007166;GO:0009897;GO:0009897;GO:0009897;GO:0009986;GO:0015629;GO:0016020;GO:0016021;GO:0030335;GO:0031295;GO:0031295;GO:0031295;GO:0031901;GO:0031901;GO:0032689;GO:0032689;GO:0032693;GO:0032693;GO:0032733;GO:0032733;GO:0034097;GO:0034097;GO:0042102;GO:0042102;GO:…	K06745	-	T	09W7E;1CS6T;13QT3;1AVR7;18WQ4;0IIBU;0V75P;0DHGI;0UJ64	CD274 molecule [Source:RGD Symbol;Acc:1566211]	499342	D4AE25
ENSRNOG00000014610	131.227	60.0541	202.399	3.37029	1.75287	0.0417363	0.468151	1	141561334	141604273	-	3851	Anpep	GO:0004177;GO:0005615;GO:0005793;GO:0005886;GO:0006508;GO:0006508;GO:0006508;GO:0008233;GO:0008237;GO:0008237;GO:0008237;GO:0008270;GO:0008270;GO:0008270;GO:0009897;GO:0016020;GO:0016787;GO:0046872;GO:0070062;GO:0006508;GO:0008237;GO:0008270;	K11140	EC:3.4.11.2	O;E	KOG1046;0DFDN;1AT99;09U40;0V532;0UH1U;18U72;12P0W;1CQ3E	alanyl aminopeptidase, membrane [Source:RGD Symbol;Acc:2991]	81641	P15684
ENSRNOG00000030253	28.2861	12.9762	43.5961	3.3597	1.74833	0.00671589	0.198801	2	207252196	207255824	-	544	Tafa3	GO:0005615;GO:0005615;GO:0005615;GO:0005615;GO:0007165;GO:0014016;GO:0048018;GO:1902692;GO:1903979;GO:1903979;GO:1903979;GO:1903980;GO:1903980;GO:1903980;	-	-	S	13S60;1B64U;0A723;0UVQ2;0VHW1;0IXED;1D3W7;0DUIJ;1939K	TAFA chemokine like family member 3 [Source:RGD Symbol;Acc:1587462]	691123	-
ENSRNOG00000013791	138.875	63.7645	213.986	3.35588	1.74669	0.0186064	0.325702	1	21613148	21684480	+	2770	Enpp3	GO:0002276;GO:0003676;GO:0003824;GO:0004528;GO:0005509;GO:0006220;GO:0006796;GO:0008270;GO:0009143;GO:0009897;GO:0009897;GO:0016787;GO:0033007;GO:0046034;GO:0046034;GO:0046872;GO:0047429;GO:0047429;GO:0048471;GO:0050728;GO:0070667;	K01513	-	F;Z	12Q62;09TDF;0UHWN;0V4CJ;1B4R7;18YZD;0DEQP;KOG2645;1CQX4	ectonucleotide pyrophosphatase/phosphodiesterase 3 [Source:RGD Symbol;Acc:708511]	54410	P97675
ENSRNOG00000031090	53.6976	24.7173	82.6779	3.34494	1.74198	0.0444981	0.480765	20	4694472	4896970	-	2452	RT1-CE7	GO:0002476;GO:0005615;GO:0009897;GO:0016020;GO:0016021;GO:0002476;GO:0005615;GO:0009897;GO:0016020;GO:0016021;	K06751	-	U	09WNN;0US52;0VB3S;1CU56;0II5V;194CQ;13KER;0DJCZ;1AX68	RT1 class I, locus CE7 [Source:RGD Symbol;Acc:1595786]	368153	Q861P9
ENSRNOG00000000081	88.0184	40.7398	135.297	3.32101	1.73162	0.00475954	0.169395	14	13192347	13274978	+	1467	Antxr2	GO:0016021;GO:0038023;	K20909	-	W;T	0DEQM;09TDC;0UT6T;1B3I4;0IK1W;18W49;13I6B;0V4CF;1CPEB	ANTXR cell adhesion molecule 2 [Source:RGD Symbol;Acc:1561294]	305633	-
ENSRNOG00000007302	637.959	295.908	980.009	3.31187	1.72765	0.0327932	0.418067	3	117569697	117766120	-	9891	Fbn1	GO:0001501;GO:0001501;GO:0001527;GO:0001527;GO:0001527;GO:0001656;GO:0001822;GO:0003674;GO:0005178;GO:0005178;GO:0005201;GO:0005201;GO:0005201;GO:0005201;GO:0005201;GO:0005509;GO:0005509;GO:0005509;GO:0005509;GO:0005576;GO:0005576;GO:0005604;GO:0005604;GO:0005615;GO:0005615;GO:0007507;GO:0007507;GO:0008201;GO:0008201;GO:0009653;GO:0031012;GO:0031012;GO:0031012;GO:0033627;GO:0033627;GO:0035582;GO:…	K06825	-	T;W	197AE;1BB5H;KOG1217;0WHK1;0E8MK;0V3C6;13DXF;1DFJC;0B50D	fibrillin 1 [Source:RGD Symbol;Acc:620908]	83727	Q9WUH8
ENSRNOG00000025075	224.097	104.093	344.101	3.30571	1.72496	3.7459e-06	0.00154987	1	165884407	165901923	-	2770	Relt	GO:0005515;GO:0005654;GO:0006915;GO:0006915;GO:0006915;GO:0016020;GO:0016021;GO:0097186;GO:0097186;GO:0097186;GO:0097186;GO:0005515;GO:0006915;GO:0006915;GO:0016020;GO:0016021;GO:0097186;GO:0097186;	K05156	-	T	1AU4V;0DHHY;13KSE;09XX0;0IKJV;1CS86;18YEG;0UJQB;0V5NR	RELT, TNF receptor [Source:RGD Symbol;Acc:1305381]	361615	F1LVW5
ENSRNOG00000019780	52.365	24.3398	80.3902	3.30284	1.72371	0.000851494	0.0688385	2	211003046	211017778	-	3403	Sypl2	GO:0006874;GO:0006874;GO:0007507;GO:0007507;GO:0008021;GO:0008021;GO:0016020;GO:0016020;GO:0016020;GO:0016021;GO:0017075;GO:0030672;GO:0033292;GO:0033292;	-	-	P;U	18SPP;0IF8N;0A37U;0UU05;1AYGS;13E5U;1CZZ7;0DQV7;0VE2J	synaptophysin-like 2 [Source:RGD Symbol;Acc:1309907]	362018	D4A6M0
ENSRNOG00000006108	16.8935	7.8615	25.9255	3.29778	1.7215	0.0271589	0.386271	10	83655460	83658589	+	541	Gngt2	GO:0003674;GO:0003924;GO:0003924;GO:0005575;GO:0005834;GO:0005834;GO:0005834;GO:0005834;GO:0005834;GO:0005886;GO:0007165;GO:0007186;GO:0007186;GO:0007186;GO:0008150;GO:0016020;GO:0031680;GO:0031681;GO:0031681;GO:0031681;	K04549	-	T	0DVRK;0A9N3;1940Q;KOG4119;1D4Y7;13WFP;0UWFN;0VKJG;1B6TP	G protein subunit gamma transducin 2 [Source:RGD Symbol;Acc:1591007]	690825	D3ZLD6
ENSRNOG00000023465	61.7242	28.727	94.7213	3.29729	1.72128	0.0151828	0.295302	4	148782479	148784562	+	1265	Depp1	GO:0005737;GO:0005739;GO:0005777;GO:0010506;GO:0043231;	-	-	S	1D3CM;0UT3V;13T3H;0IZM8;1B3DH;0VI1E;0A776;193Q7;0DU5F	DEPP1, autophagy regulator [Source:RGD Symbol;Acc:1565700]	500300	Q5BMD4;A0A0G2JSM9
ENSRNOG00000012481	48.4082	22.5653	74.251	3.29049	1.7183	0.00138274	0.0899029	2	207262934	207268609	+	2144	Ppm1j	GO:0004722;GO:0004722;GO:0006470;GO:0006470;GO:0016791;	K17504	EC:3.1.3.16	T	0USGN;09XQ6;0DJ21;0V8CS;KOG1323;1CTTM;13HDW;18TWW;1AWC4	protein phosphatase, Mg2+/Mn2+ dependent, 1J [Source:RGD Symbol;Acc:1359104]	295341	Q641Y6
ENSRNOG00000016752	335.713	156.704	514.722	3.28467	1.71575	0.0153732	0.2971	19	52647070	52705131	+	4153	Crispld2	GO:0005539;GO:0005539;GO:0005539;GO:0005576;GO:0005576;GO:0005615;GO:0008201;GO:0008201;GO:0030133;GO:0030198;GO:0030198;GO:0030324;GO:0031012;GO:0031012;GO:0060325;GO:0060325;GO:0005539;GO:0005539;GO:0005576;GO:0005576;GO:0005615;GO:0008201;GO:0030198;GO:0030324;GO:0031012;GO:0060325;GO:0005539;GO:0005539;GO:0005576;GO:0005576;GO:0005615;GO:0008201;GO:0030198;GO:0030324;GO:0031012;GO:0060325;	K24243	-	S;O;T;W;V	191YP;136J3;09UFX;0UH6Y;KOG3017;0DFRN;1ATFI;1CQF8;0V5FA	cysteine-rich secretory protein LCCL domain containing 2 [Source:RGD Symbol;Acc:620860]	171547	G3V9T1
ENSRNOG00000037085	40.9161	19.1749	62.6572	3.26766	1.70826	0.00700702	0.204428	8	128702133	128711221	-	6017	Xirp1	GO:0003779;GO:0030036;GO:0030054;	-	-	S;T;W	0UFU2;0IF8Z;13JMJ;09VV1;1CRTI;18TCV;0V6TQ;0DH39;1AWZY	xin actin-binding repeat containing 1 [Source:RGD Symbol;Acc:1304776]	-	-
ENSRNOG00000050024	14.4287	6.76417	22.0932	3.26621	1.70762	0.0422665	0.471059	1	227592635	227607042	+	1051	Ms4a4e	GO:0005783;GO:0005794;GO:0005886;GO:0016020;GO:0016021;GO:0016021;GO:0016021;GO:0044853;	K22190	-	-	-	membrane spanning 4-domains A4E [Source:RGD Symbol;Acc:6493207]	361734	-
ENSRNOG00000009870	59.4936	27.9069	91.0802	3.26372	1.70652	0.0445697	0.480967	10	55998530	56000225	-	1567	Tmem88	GO:0005829;GO:0005829;GO:0005829;GO:0005886;GO:0005886;GO:0005886;GO:0005886;GO:0016020;GO:0016021;GO:0030165;GO:0030165;GO:0030165;GO:0030165;GO:0050821;GO:0050821;GO:0050821;GO:0072659;GO:0072659;GO:0072659;GO:0090090;GO:0090090;GO:0090090;GO:0090090;GO:0090090;GO:0090090;	-	-	S	1D3PC;0VIDM;0A7J5;0IZIZ;0DUBU;13U03;1B5XN;1930K;0UVHU	transmembrane protein 88 [Source:RGD Symbol;Acc:1561781]	497936	G3V7A2
ENSRNOG00000050190	691.775	324.992	1058.56	3.25718	1.70362	0.0146658	0.292432	3	11679530	11717485	+	3035	Eng	GO:0001525;GO:0001525;GO:0001569;GO:0001570;GO:0001570;GO:0001570;GO:0001837;GO:0001934;GO:0001934;GO:0001947;GO:0003148;GO:0003198;GO:0003203;GO:0003208;GO:0003209;GO:0003222;GO:0003273;GO:0005024;GO:0005024;GO:0005114;GO:0005114;GO:0005114;GO:0005534;GO:0005534;GO:0005539;GO:0005539;GO:0005539;GO:0005615;GO:0005615;GO:0005615;GO:0005886;GO:0006355;GO:0006355;GO:0007179;GO:0007179;GO:0007179;GO:…	K06526	-	T	0V98M;0UN8W;13KN7;1AXS3;1CVVT;0A2J0;0IQ57;0DQ6I;190QN	endoglin [Source:RGD Symbol;Acc:1593188]	497010	Q6Q3E8;Q3KR75
ENSRNOG00000045837	21.056	9.94646	32.1656	3.23387	1.69326	0.0181173	0.321781	19	320906	323636	+	642	AABR07042611.1	-	-	-	-	-	-	-	-
ENSRNOG00000012582	144.282	68.399	220.164	3.21882	1.68653	0.00276378	0.129343	16	68954875	68968248	-	831	Eif4ebp1	GO:0000082;GO:0000082;GO:0002192;GO:0002192;GO:0002931;GO:0005634;GO:0005737;GO:0005737;GO:0005829;GO:0005829;GO:0005829;GO:0006417;GO:0008190;GO:0008190;GO:0008190;GO:0008190;GO:0008190;GO:0008190;GO:0008286;GO:0008286;GO:0017148;GO:0030324;GO:0030371;GO:0030371;GO:0030371;GO:0031333;GO:0031369;GO:0031929;GO:0031929;GO:0031929;GO:0032991;GO:0045471;GO:0045931;GO:0045931;GO:0045947;GO:0045947;GO:…	K07205	-	J;K	0J2Z0;19371;1B5VM;13WGN;1D3VF;0A80N;0VIV1;0DUQ9;0UVGT	eukaryotic translation initiation factor 4E binding protein 1 [Source:RGD Symbol;Acc:620259]	116636	Q62622
ENSRNOG00000023995	23.7761	11.2818	36.2704	3.21496	1.6848	0.012862	0.278422	9	43117914	43127887	-	2684	Ankrd39	GO:0003950;GO:0005515;GO:0005634;GO:0005737;GO:0006471;GO:0070198;GO:0090263;GO:1904355;	-	-	S;E	1B048;KOG0504;0A5Z0;0DT6E;0VGU8;18UD4;13NZY;1D1CA;0UT0G	ankyrin repeat domain 39 [Source:RGD Symbol;Acc:1559504]	367251	D4AAF1
ENSRNOG00000007390	896.321	425.317	1367.33	3.21484	1.68474	0.0184192	0.324295	6	76267228	76270457	-	1565	Nfkbia	GO:0002523;GO:0005515;GO:0005634;GO:0005634;GO:0005737;GO:0005737;GO:0005829;GO:0005829;GO:0006606;GO:0007249;GO:0007253;GO:0008139;GO:0010468;GO:0010745;GO:0010875;GO:0010888;GO:0014070;GO:0019899;GO:0031072;GO:0031625;GO:0031663;GO:0032088;GO:0032270;GO:0032495;GO:0032496;GO:0032991;GO:0033209;GO:0033256;GO:0034142;GO:0035994;GO:0042127;GO:0042802;GO:0042994;GO:0043330;GO:0044877;GO:0045471;GO:…	K04734	-	K;E	0UMFD;KOG0504;1AWTT;0V8EB;1CTJ4;18VJA;09XG9;0DITT;13MEG	NFKB inhibitor alpha [Source:RGD Symbol;Acc:3171]	25493	Q63746
ENSRNOG00000008215	316.782	150.404	483.16	3.21243	1.68366	2.25982e-06	0.0010285	10	104654717	104659188	-	2198	Trim47	GO:0004842;GO:0004842;GO:0004842;GO:0005829;GO:0008270;GO:0008270;GO:0016567;GO:0016567;GO:0016567;GO:0046872;	K12023	-	O	0A1J2;0VCET;18SZS;0UJVK;0DP4V;13HCI;1CY2X;0IJ9G;1B01C	tripartite motif-containing 47 [Source:RGD Symbol;Acc:1597317]	690374	D3ZA22
ENSRNOG00000012989	136.011	64.6577	207.364	3.2071	1.68127	0.0141223	0.288549	5	148470061	148492232	-	1807	Serinc2	GO:0005789;GO:0005886;GO:0006658;GO:0006658;GO:0006658;GO:0006665;GO:0006665;GO:0006665;GO:0016020;GO:0016020;GO:0016020;GO:0016020;GO:0016021;GO:0030674;GO:1904219;GO:1904222;	K24176	-	A;S;O	0DK45;0UTJZ;09WE9;KOG2592;1CXUW;1B0CC;18TQN;0V7CS;12PW2	serine incorporator 2 [Source:RGD Symbol;Acc:1311396]	313057	Q4FZV1
ENSRNOG00000018484	202.164	96.2878	308.041	3.19917	1.6777	0.00488618	0.171674	5	135997725	136002900	-	2389	Plk3	GO:0000082;GO:0000122;GO:0000302;GO:0002039;GO:0004672;GO:0004674;GO:0004674;GO:0005515;GO:0005524;GO:0005634;GO:0005730;GO:0005737;GO:0005795;GO:0005813;GO:0006468;GO:0006970;GO:0006974;GO:0009314;GO:0031122;GO:0032465;GO:0043066;GO:0051302;GO:0090166;GO:0090316;GO:1904716;GO:2000777;	K08862	EC:2.7.11.21	D;B	0DJU6;0V605;0UNZU;09V0D;1AYZW;1CUMA;KOG0575;12PB0;18ZVH	polo-like kinase 3 [Source:RGD Symbol;Acc:62039]	58936	Q9R011
ENSRNOG00000019810	211.386	100.699	322.073	3.19836	1.67733	7.39792e-06	0.00269358	9	82556573	82564294	+	2176	Des	GO:0005634;GO:0005737;GO:0005856;GO:0005882;GO:0005882;GO:0005882;GO:0005882;GO:0005911;GO:0005916;GO:0008092;GO:0014704;GO:0030018;GO:0030018;GO:0031594;GO:0042383;GO:0042383;GO:0042802;GO:0043292;GO:0045109;GO:0045111;GO:0097512;	K07610	-	Z	1CU69;0UGTY;18TDT;09YCR;12RK9;1ASHR;0V9A9;0DJSK;0IFZ1	desmin [Source:RGD Symbol;Acc:620686]	64362	P48675;Q6P725
ENSRNOG00000007650	2247.33	1071.03	3423.63	3.19657	1.67652	0.0129377	0.278561	7	3320103	3335582	+	1121	Cd63	GO:0005764;GO:0005770;GO:0016021;GO:0043473;GO:0050931;GO:1900746;GO:0002092;GO:0002092;GO:0005515;GO:0005515;GO:0005576;GO:0005615;GO:0005737;GO:0005764;GO:0005764;GO:0005765;GO:0005765;GO:0005768;GO:0005770;GO:0005771;GO:0005886;GO:0005886;GO:0005887;GO:0007160;GO:0007160;GO:0009986;GO:0009986;GO:0010008;GO:0010633;GO:0015031;GO:0016020;GO:0016021;GO:0016021;GO:0016021;GO:0016021;GO:0016477;GO:…	K06497	-	S;G;U	13Q5J;1AXJ9;KOG3882;0A5MA;0VDHX;0UN2P;1CU4Y;18YW3;0DJCS	Cd63 molecule [Source:RGD Symbol;Acc:62080]	29186	P28648
ENSRNOG00000005917	113.037	53.9652	172.108	3.18924	1.67321	0.0488678	0.500296	7	51273771	51353068	-	2111	Pawr	GO:0000122;GO:0000785;GO:0005634;GO:0005634;GO:0005737;GO:0005737;GO:0005886;GO:0006915;GO:0006915;GO:0010628;GO:0010629;GO:0015629;GO:0019899;GO:0030889;GO:0042130;GO:0042986;GO:0043522;GO:0048147;GO:0050860;GO:0097190;GO:1901300;GO:2000774;	-	-	K	0DI6M;1CSX0;0IFBP;09XI8;0UMHS;1AX06;18XXS;0V8GD;12QJP	pro-apoptotic WT1 regulator [Source:RGD Symbol;Acc:69065]	64513	Q62627
ENSRNOG00000019620	31.578	15.0833	48.0727	3.18715	1.67227	0.0129232	0.278561	2	187751776	187771865	-	1142	Pmf1	GO:0000818;GO:0000444;GO:0000775;GO:0000776;GO:0000777;GO:0000777;GO:0000818;GO:0000818;GO:0000818;GO:0003713;GO:0005634;GO:0005694;GO:0007049;GO:0007059;GO:0007059;GO:0043522;GO:0045893;GO:0051301;	K11546	-	K	0DSNQ;18T2N;0A59C;0IWZA;13QN0;0VG4Y;0UMM1;1D1YZ;1B2P9	polyamine-modulated factor 1 [Source:RGD Symbol;Acc:1584694]	681050	D3ZEH8
ENSRNOG00000036711	32.9084	15.7231	50.0937	3.18599	1.67174	0.00598584	0.188533	1	198572999	198577226	-	3866	Spn	GO:0004888;GO:0004888;GO:0016020;GO:0016021;GO:0032609;GO:0050863;GO:0050863;GO:2000404;GO:2000404;	K06477	-	S;T	13UTR;0J161;0DSHB;1D1TC;0VB1Y;0UUZ4;0A531	sialophorin [Source:RGD Symbol;Acc:3750]	24796	R9PXZ7
ENSRNOG00000024650	21.4758	10.2663	32.6853	3.18376	1.67073	0.0164806	0.310269	16	74752655	74779184	+	2549	Ckap2	GO:0000281;GO:0000281;GO:0005737;GO:0005813;GO:0005813;GO:0005829;GO:0007026;GO:0007026;GO:0015630;GO:0015630;GO:0015630;GO:0045944;GO:0045944;	K16769	-	S;Z	190V0;0UJDD;0DHAF;13KYK;09W1C;0IF2W;1CS0F;0V6ZN;1AWNM	cytoskeleton associated protein 2 [Source:RGD Symbol;Acc:1311631]	306575	D3ZPD0
ENSRNOG00000046261	41.3479	19.8352	62.8607	3.16916	1.6641	0.00995571	0.249372	8	23142734	23148396	-	1549	Acp5	GO:0003993;GO:0016787;GO:0003993;GO:0003993;GO:0003993;GO:0003993;GO:0005764;GO:0008198;GO:0008199;GO:0016311;GO:0016787;GO:0016787;GO:0016787;GO:0032496;GO:0032691;GO:0032695;GO:0032720;GO:0032929;GO:0034097;GO:0045019;GO:0045453;GO:0046872;GO:0050728;GO:0050830;GO:0060349;	K14379	EC:3.1.3.2	O	18WGQ;1B2SR;KOG2679;0VCQA;0DPGS;0A1UK;0USUE;1CYF5;138I5	acid phosphatase 5, tartrate resistant [Source:RGD Symbol;Acc:2022]	25732	P29288
ENSRNOG00000028872	361.726	174.021	549.431	3.15726	1.65867	0.029215	0.393553	2	60546091	60683451	-	4716	Rai14	GO:0003779;GO:0005515;GO:0001650;GO:0003779;GO:0005515;GO:0005654;GO:0005829;	-	-	Z;S	0VCJ9;18UBU;0DPBF;0A1PH;13MNT;0IEWD;1B2V3;0UJXP;1CY9H	retinoic acid induced 14 [Source:RGD Symbol;Acc:1305942]	294804	Q5U312
ENSRNOG00000037563	57.897	27.8679	87.9261	3.1551	1.65769	0.0405109	0.463319	10	56268720	56270640	-	1241	Cd68	GO:0002437;GO:0002605;GO:0005764;GO:0005764;GO:0005765;GO:0005765;GO:0005886;GO:0005886;GO:0005886;GO:0007568;GO:0010008;GO:0016020;GO:0016020;GO:0016020;GO:0016021;GO:0031669;GO:0031902;GO:0035425;GO:0071222;GO:0071310;GO:0072594;GO:0140052;	K06501	-	U	0DJIF;09Y56;0UJ4Q;1AREW;0V92P;12NCI;1CUB0;KOG4818;18YJX	Cd68 molecule [Source:RGD Symbol;Acc:1305970]	287435	Q4FZY1
ENSRNOG00000015411	24.3128	11.7448	36.8807	3.14016	1.65084	0.0191906	0.329589	4	155386711	155401480	-	1272	Apobec1	GO:0003723;GO:0003723;GO:0003729;GO:0003824;GO:0003824;GO:0004126;GO:0004126;GO:0004126;GO:0004126;GO:0004131;GO:0005515;GO:0005634;GO:0005634;GO:0005634;GO:0005737;GO:0005737;GO:0005737;GO:0005737;GO:0006397;GO:0006641;GO:0006641;GO:0006970;GO:0008047;GO:0008270;GO:0008270;GO:0009972;GO:0010043;GO:0010332;GO:0010332;GO:0016554;GO:0016554;GO:0016554;GO:0016556;GO:0016556;GO:0016787;GO:0016787;GO:…	K16932	EC:3.5.4.36	K	0IKDF;0VDJ5;1B207;1CZCX;13HK8;1930E;0A2PB;0UTK5;0DQB0	apolipoprotein B mRNA editing enzyme catalytic subunit 1 [Source:RGD Symbol;Acc:2133]	25383	P38483
ENSRNOG00000020991	84.8673	41.1374	128.597	3.12604	1.64434	0.0113711	0.262092	1	227919301	227932603	-	2452	Ms4a6a	GO:0016021;	K22191	-	S	0UUPF;1D2N7;0DS71;0VGZN;193JN;1B37A;0A64Y;13W8M;0J2FM	membrane spanning 4-domains A6A [Source:RGD Symbol;Acc:1305800]	361735	F1LZT4
ENSRNOG00000003018	336.06	163.147	508.973	3.11972	1.64142	0.00623178	0.192652	13	88995316	89032487	+	3122	Olfml2b	GO:0030198;GO:0030198;GO:0031012;GO:0031012;GO:0042802;GO:0042802;GO:0050840;GO:0050840;	-	-	W	0V58X;12NMM;0UH28;1AZIB;1CQ97;18SG8;09U9S;KOG3545;0DFJG	olfactomedin-like 2B [Source:RGD Symbol;Acc:1309257]	304960	D4A0J7
ENSRNOG00000033502	15.6699	7.61043	23.7295	3.11802	1.64063	0.0409432	0.465455	7	126028350	126043847	+	1805	Ribc2	-	-	-	S	18VKW;1AUP2;0IE6I;12U39;1D0HA;0UJ68;0DEV5;0V4HH;09TII	RIB43A domain with coiled-coils 2 [Source:RGD Symbol;Acc:1309033]	300122	Q6AXN9
ENSRNOG00000015845	1486.08	722.429	2249.72	3.11411	1.63882	0.000647428	0.0613258	3	11921715	11971327	+	3678	Niban2	GO:0003713;GO:0005737;GO:0005829;GO:0005829;GO:0005886;GO:0005912;GO:0008285;GO:0032274;GO:0043066;GO:0045892;GO:0045893;GO:2000279;GO:2000679;	-	-	O;T	0IFR1;0DHAS;1AWIM;09X6Z;18SRM;0V85K;13HCM;1CS0W;0UM2T	niban apoptosis regulator 2 [Source:RGD Symbol;Acc:1307018]	362115	B4F7E8
ENSRNOG00000054999	91.3215	44.6048	138.038	3.0947	1.6298	0.0292537	0.393553	4	56549739	56549993	+	255	Hilpda	GO:0001819;GO:0001819;GO:0005102;GO:0005615;GO:0005654;GO:0005811;GO:0008284;GO:0008284;GO:0009986;GO:0010884;GO:0010884;GO:0030141;GO:0035425;GO:0071456;	-	-	-	-	hypoxia inducible lipid droplet-associated [Source:RGD Symbol;Acc:2319900]	-	-
ENSRNOG00000057347	62.9095	30.7283	95.0907	3.09457	1.62974	0.00494419	0.172869	3	164424515	164425910	+	1396	Cebpb	GO:0000122;GO:0000779;GO:0000779;GO:0000785;GO:0000785;GO:0000976;GO:0000976;GO:0000976;GO:0000977;GO:0000977;GO:0000978;GO:0000978;GO:0000978;GO:0000978;GO:0000979;GO:0000979;GO:0000981;GO:0000981;GO:0000981;GO:0000981;GO:0001227;GO:0001228;GO:0001228;GO:0001228;GO:0001541;GO:0001541;GO:0001541;GO:0001889;GO:0001892;GO:0001892;GO:0002432;GO:0003677;GO:0003677;GO:0003677;GO:0003682;GO:0003682;GO:…	K10048	-	-	-	CCAAT/enhancer binding protein beta [Source:RGD Symbol;Acc:2327]	24253	P21272
ENSRNOG00000017981	14.8559	7.32588	22.386	3.05574	1.61152	0.0490555	0.500311	17	77224112	77246478	+	5043	Mcm10	GO:0003688;GO:0003690;GO:0003690;GO:0003697;GO:0003697;GO:0003697;GO:0005634;GO:0005634;GO:0005634;GO:0005634;GO:0005634;GO:0005654;GO:0005730;GO:0006260;GO:0006260;GO:0006260;GO:0006270;GO:0006270;GO:0006270;GO:0006974;GO:0006974;GO:0008283;GO:0008283;GO:0019899;GO:0019899;GO:0031298;GO:0042802;GO:0042802;GO:0046872;	K10736	-	D;L	18UA5;0V9ZU;1CT8F;KOG3056;09Z2C;0DKHR;1B3YX;0UT0P;13KH9	minichromosome maintenance 10 replication initiation factor [Source:RGD Symbol;Acc:1311330]	307126	D3Z8C4
ENSRNOG00000030712	88.5583	43.8216	133.295	3.04176	1.60491	0.0397482	0.459244	20	5374985	5378539	+	1671	RT1-A2	GO:0001916;GO:0002476;GO:0002485;GO:0005515;GO:0005615;GO:0005886;GO:0006955;GO:0006955;GO:0009897;GO:0009897;GO:0010977;GO:0016020;GO:0016021;GO:0019882;GO:0019882;GO:0045121;	K06751	-	U	09WNN;0US52;0VB3S;1CU56;0II5V;194CQ;13KER;0DJCZ;1AX68	RT1 class Ia, locus A2 [Source:RGD Symbol;Acc:1595923]	24974	Q6MGB8
ENSRNOG00000016678	90.6766	44.8838	136.469	3.0405	1.60431	0.0010127	0.0758692	3	12262822	12292663	+	2127	Angptl2	GO:0001525;GO:0005102;GO:0005615;GO:0062023;	-	-	S;T;E	0DH5X;1B35P;1CRW5;13DWM;0V6W2;0UNZ8;KOG2579;09VXJ;18XZR	angiopoietin-like 2 [Source:RGD Symbol;Acc:620004]	171100	Q9JJ03
ENSRNOG00000020657	554.145	274.67	833.621	3.03499	1.60169	0.0472079	0.493681	2	188745503	188757066	+	3643	Shc1	GO:0001525;GO:0007165;GO:0030971;GO:0035556;GO:0000165;GO:0000187;GO:0000187;GO:0001525;GO:0001525;GO:0001525;GO:0001784;GO:0005158;GO:0005159;GO:0005168;GO:0005737;GO:0005886;GO:0007165;GO:0007165;GO:0007173;GO:0007507;GO:0030971;GO:0030971;GO:0030971;GO:0031532;GO:0035556;GO:0035556;GO:0040008;GO:0042127;GO:0042742;GO:0043066;GO:0043410;GO:0045892;GO:0045893;GO:0046875;GO:0046875;GO:0048408;GO:…	K06279	-	T	KOG3697;0UFYF;1AT98;0DH33;09VUW;12P9B;18T93;1CRTC;0V6TI	SHC adaptor protein 1 [Source:RGD Symbol;Acc:620446]	85385	Q5M824;F1LN14
ENSRNOG00000005695	885.93	440.851	1331.01	3.01919	1.59416	0.0038323	0.154011	4	170856751	170860225	-	676	Mgp	GO:0001503;GO:0005509;GO:0005509;GO:0005509;GO:0005576;GO:0005576;GO:0005576;GO:0007275;GO:0030154;GO:0030500;GO:0030500;GO:0031012;GO:0031012;GO:0051216;GO:0062023;GO:0062023;	K19481	-	W	0A8WX;13TZ9;0DV9Z;0VJT6;1D4KM;0UW3Q;0IZCH	matrix Gla protein [Source:RGD Symbol;Acc:3088]	25333	P08494;Q5RK05
ENSRNOG00000007726	1390.04	692.709	2087.37	3.01333	1.59136	0.0187644	0.326272	8	48472824	48481001	+	2903	Mcam	GO:0001525;GO:0003094;GO:0009897;GO:0061042;	K06534	-	T	1CQS7;12NXJ;0V5SN;1906N;09UT4;1AZ58;0UMR5;0DG2Q;0IEC2	melanoma cell adhesion molecule [Source:RGD Symbol;Acc:620463]	78967	Q9EPF2
ENSRNOG00000009022	46.1568	23.0266	69.287	3.009	1.58928	0.0478225	0.496155	4	114835064	114850701	+	2570	Rtkn	GO:0007165;GO:0007266;GO:0032185;	K24024	-	T	0DF0V;0UG51;09TQP;1CPQN;0V4PX;12PWC;0IIHF	rhotekin [Source:RGD Symbol;Acc:727874]	297383	Q6V7V2
ENSRNOG00000017980	103.795	51.7849	155.806	3.00871	1.58914	0.000451687	0.0510632	1	198744050	198781750	+	4511	Itgal	GO:0001772;GO:0002291;GO:0002291;GO:0005911;GO:0007155;GO:0007155;GO:0007155;GO:0007157;GO:0007157;GO:0007159;GO:0007159;GO:0007160;GO:0007160;GO:0007166;GO:0007229;GO:0008305;GO:0008305;GO:0009897;GO:0009986;GO:0009986;GO:0016020;GO:0016021;GO:0022407;GO:0022409;GO:0030369;GO:0030369;GO:0034687;GO:0034687;GO:0035683;GO:0035683;GO:0042102;GO:0043113;GO:0043113;GO:0044877;GO:0046872;GO:0050798;GO:…	K05718	-	W	1CREA;0UGYZ;0V6ET;12R4T;KOG3637;0DGQF;09VFM;191BA;1B0IN	integrin subunit alpha L [Source:RGD Symbol;Acc:631424]	308995	Q3T1L6
ENSRNOG00000009222	83.3576	41.5916	125.123	3.00838	1.58899	0.0210539	0.344397	5	159845774	159874206	+	3913	Epha2	GO:0000166;GO:0001501;GO:0001501;GO:0001568;GO:0001568;GO:0001570;GO:0001570;GO:0001649;GO:0001649;GO:0001818;GO:0001818;GO:0002043;GO:0002043;GO:0004672;GO:0004672;GO:0004713;GO:0004713;GO:0004713;GO:0004714;GO:0004714;GO:0004714;GO:0004714;GO:0004714;GO:0005003;GO:0005003;GO:0005005;GO:0005515;GO:0005524;GO:0005524;GO:0005524;GO:0005886;GO:0005886;GO:0005887;GO:0005887;GO:0005887;GO:0005887;GO:…	K05103	EC:2.7.10.1	T	0A4HX;1CRV8;1AVEP;192FE;0US7B;KOG0196;0V42J;12PWI;0DH50	Eph receptor A2 [Source:RGD Symbol;Acc:1307204]	366492	D3ZBN3
ENSRNOG00000015278	924.651	461.555	1387.75	3.00668	1.58817	0.0354386	0.431545	9	119325283	119332967	-	974	Myl12a	GO:0001725;GO:0005509;GO:0008360;GO:0016460;GO:0030018;GO:0035254;GO:0072659;	K12757	-	Z	0UJEE;18Z60;0DIUJ;0V8F4;12SKP;KOG0031;09XH2;1CY6F;1B4EY	myosin light chain 12A [Source:RGD Symbol;Acc:1309537]	501203	P13832
ENSRNOG00000002919	21581.8	10775.6	32388.1	3.00568	1.58769	0.0226588	0.355913	10	90990762	90999506	-	3661	Gfap	GO:0005178;GO:0005200;GO:0005200;GO:0005515;GO:0005737;GO:0005737;GO:0005737;GO:0005737;GO:0005765;GO:0005856;GO:0005856;GO:0005882;GO:0005882;GO:0005882;GO:0005882;GO:0005882;GO:0006886;GO:0006886;GO:0009611;GO:0010467;GO:0010467;GO:0010625;GO:0010625;GO:0010977;GO:0010977;GO:0014002;GO:0014002;GO:0016020;GO:0016020;GO:0019900;GO:0030198;GO:0030198;GO:0031102;GO:0031102;GO:0042802;GO:0042802;GO:…	K05640	-	Z	1CUE3;0DJMA;0IJXF;18Y3W;1AYZ9;13MAZ;09Y7U;0UGSQ;0V95E	glial fibrillary acidic protein [Source:RGD Symbol;Acc:2679]	24387	P47819
ENSRNOG00000002520	1272.23	635.241	1909.23	3.00552	1.58761	0.00535314	0.179143	10	4719713	4763510	+	2238	Litaf	GO:0000978;GO:0001228;GO:0001817;GO:0005654;GO:0005765;GO:0005765;GO:0005794;GO:0005886;GO:0008270;GO:0009898;GO:0016020;GO:0032496;GO:0043231;GO:0045944;GO:0046872;GO:0050699;GO:0071222;GO:0098559;GO:0098560;GO:0098574;GO:1901223;	K19363	-	S;K	0IVVU;0VHZM;0DQ6M;0A73K;1CZ7X;193N5;13Q3V;1B5NF;0UTGC	lipopolysaccharide-induced TNF factor [Source:RGD Symbol;Acc:69294]	65161	P0C0T0;B2RYP2
ENSRNOG00000013945	358.9	179.475	538.325	2.99945	1.5847	5.75761e-06	0.00223015	1	84018859	84040433	-	3291	Itpkc	GO:0000166;GO:0000828;GO:0005516;GO:0005524;GO:0005634;GO:0005634;GO:0005737;GO:0005737;GO:0008440;GO:0008440;GO:0008440;GO:0008440;GO:0016301;GO:0016301;GO:0016301;GO:0016301;GO:0016301;GO:0016310;GO:0016740;GO:0032958;GO:0032958;GO:0032958;GO:0046854;	K00911	EC:2.7.1.127	I	0DETR;KOG1621;0UFV3;09X5Z;1CPHH;18VPA;0V5G0;12Q5E;1ARPZ	inositol-trisphosphate 3-kinase C [Source:RGD Symbol;Acc:631336]	308451	Q80ZG2
ENSRNOG00000008942	27.2942	13.6604	40.928	2.9961	1.58308	0.0314257	0.40837	6	23337571	23346173	+	4816	Pcare	GO:0001750;GO:0001917;GO:0005929;GO:0035845;GO:1903546;	K24165	-	S	0UHRE;0DR9H;1D0EX;13M35;1ATBS;0V9X7;19540;0IIKW;0A3NS	photoreceptor cilium actin regulator [Source:RGD Symbol;Acc:1304963]	313891	D3ZS67
ENSRNOG00000011668	339.196	170.359	508.032	2.98212	1.57634	0.00109285	0.0783284	17	12261102	12276315	+	1960	Nfil3	GO:0000122;GO:0000977;GO:0000978;GO:0000978;GO:0001227;GO:0001779;GO:0003700;GO:0005634;GO:0006351;GO:0006355;GO:0006366;GO:0006955;GO:0007623;GO:0010628;GO:0045892;GO:0045892;GO:0045893;GO:0071353;	K09059	-	K	1DG2J;13FFK;0E96U;0WIM0;0B5Y4;197DM;1BBCW;0ISXX;0V3NP	nuclear factor, interleukin 3 regulated [Source:RGD Symbol;Acc:620972]	114519	Q6IMZ0
ENSRNOG00000013805	230.275	115.755	344.796	2.97868	1.57467	0.00185341	0.105378	14	81488008	81504686	+	1597	Tnip2	GO:0005654;GO:0005737;GO:0005737;GO:0005829;GO:0007249;GO:0019901;GO:0019901;GO:0023035;GO:0031593;GO:0031593;GO:0031593;GO:0034134;GO:0034134;GO:0034138;GO:0034138;GO:0034162;GO:0043032;GO:0043123;GO:0043123;GO:0043123;GO:0045944;GO:0045944;GO:0045944;GO:0046872;GO:0050821;GO:0050871;GO:0070498;GO:0070530;GO:0070530;GO:0071222;GO:2000352;GO:2000352;	-	-	T;K	18SPA;1CQP0;0V5PA;09UPQ;0DFZE;1AXXE;0IEB1;0UHIS;12NVJ	TNFAIP3 interacting protein 2 [Source:RGD Symbol;Acc:1307717]	305451	A0A0G2QC05
ENSRNOG00000020182	565.189	284.635	845.743	2.97132	1.57111	0.0118413	0.265304	1	198420806	198450047	-	3674	Mvp	GO:0005634;GO:0005634;GO:0005737;GO:0005737;GO:0005829;GO:0005856;GO:0019901;GO:0019903;GO:0031953;GO:0038127;GO:0042059;GO:0042802;GO:0048471;GO:0061099;	K17266	-	Z	0DN21;1CWYE;0UIB6;1ATVH;0A0F8;18UVY;0VBBH;0IF6T;13JAZ	major vault protein [Source:RGD Symbol;Acc:70932]	64681	Q62667
ENSRNOG00000039971	35.0163	17.661	52.3717	2.96539	1.56822	0.0225843	0.355882	17	4169838	4171723	+	837	Ctla2a	GO:0004197;GO:0005615;GO:0005764;GO:0051603;	-	-	O	0VXDU;0AJVH;149N9;KOG1543	cytotoxic T lymphocyte-associated protein 2 alpha [Source:RGD Symbol;Acc:1565540]	498690	D3ZHI6
ENSRNOG00000050697	499.93	252.64	747.22	2.95765	1.56445	0.00106235	0.0774966	3	172527107	172537877	-	1355	Ctsz	GO:0004180;GO:0004180;GO:0004197;GO:0004197;GO:0005576;GO:0005615;GO:0005615;GO:0005615;GO:0005615;GO:0005764;GO:0005764;GO:0005764;GO:0005783;GO:0006508;GO:0006508;GO:0006508;GO:0006508;GO:0006508;GO:0008233;GO:0008234;GO:0008234;GO:0008234;GO:0009986;GO:0010757;GO:0010757;GO:0010977;GO:0016787;GO:0030426;GO:0031410;GO:0031410;GO:0032091;GO:0032091;GO:0043525;GO:0051603;GO:0060441;GO:0060441;GO:…	K08568	EC:3.4.18.1	O	0V558;1CQ5N;12NZ5;0UHSF;KOG1543;1ATCR;0DFFX;09U69;18TBS	cathepsin Z [Source:RGD Symbol;Acc:708479]	252929	Q9R1T3
ENSRNOG00000012660	90.1389	45.5679	134.71	2.95625	1.56377	0.00194411	0.108058	2	143656793	143688087	+	3229	Postn	GO:0001666;GO:0001953;GO:0003073;GO:0003674;GO:0005515;GO:0005615;GO:0005615;GO:0005737;GO:0005802;GO:0007155;GO:0007155;GO:0007155;GO:0008201;GO:0008593;GO:0009612;GO:0009888;GO:0014850;GO:0014911;GO:0030198;GO:0030198;GO:0031012;GO:0031012;GO:0031594;GO:0032355;GO:0042060;GO:0044344;GO:0046872;GO:0050839;GO:0062023;GO:0071307;GO:0071356;GO:0071560;GO:1900025;GO:1990138;GO:1990523;GO:2000343;GO:…	K24790	-	W;M	0V4XK;KOG1437;0DIVC;0UMH6;1CTKR;13I26;09TYN	periostin [Source:RGD Symbol;Acc:1305285]	361945	D3ZAF5
ENSRNOG00000018109	1005.07	509.858	1500.28	2.94254	1.55706	0.00336886	0.143271	5	153568745	153625869	-	1154	Clic4	GO:0001525;GO:0001886;GO:0005244;GO:0005254;GO:0005737;GO:0005737;GO:0005739;GO:0005739;GO:0005813;GO:0005829;GO:0005886;GO:0005886;GO:0005902;GO:0005911;GO:0006811;GO:0006821;GO:0007035;GO:0009566;GO:0009986;GO:0015630;GO:0016020;GO:0016363;GO:0030216;GO:0030216;GO:0030336;GO:0030496;GO:0034220;GO:0034707;GO:0034765;GO:0035264;GO:0045177;GO:0048471;GO:0048754;GO:0061299;GO:0071277;	K05024	-	P	KOG1422;13HTJ;0DKFR;0V9Y1;1B595;1CRYR;0UIAQ;18ZDF;09Z0K	chloride intracellular channel 4 [Source:RGD Symbol;Acc:61857]	83718	Q9Z0W7
ENSRNOG00000050539	93.2913	47.3552	139.227	2.94007	1.55585	0.0101993	0.250112	6	125644804	125723944	-	2483	Fbln5	GO:0000122;GO:0001558;GO:0005178;GO:0005178;GO:0005509;GO:0005509;GO:0005515;GO:0005576;GO:0005615;GO:0005615;GO:0005615;GO:0007155;GO:0008022;GO:0008022;GO:0016525;GO:0030198;GO:0033690;GO:0034394;GO:0042803;GO:0042803;GO:0042803;GO:0045944;GO:0046903;GO:0046903;GO:0048251;GO:0048251;GO:0048251;GO:0048251;GO:0048251;GO:0048251;GO:0062023;GO:0062023;GO:0062023;GO:0071953;GO:0098867;GO:2000121;GO:…	K17340	-	W;T	1DFIT;1BB4Y;13DWS;197A2;0B4ZH;0WHJ4;0E8M0;0IR76;0V3BK	fibulin 5 [Source:RGD Symbol;Acc:2594]	29158	Q9WVH8
ENSRNOG00000014835	24.6408	12.5148	36.7668	2.93788	1.55477	0.0173261	0.316371	9	47134034	47182170	+	3548	Il1rl1	GO:0002113;GO:0002826;GO:0004908;GO:0004908;GO:0005515;GO:0005829;GO:0005886;GO:0005925;GO:0007165;GO:0007165;GO:0009897;GO:0016020;GO:0016021;GO:0019221;GO:0032689;GO:0032722;GO:0032754;GO:0043032;GO:0050729;GO:0004908;	K05171	-	T	0V83R;0DIG7;0UM00;1CT6V;1AVFN;0IPTT;18UVD;09X56;13MTS	interleukin 1 receptor-like 1 [Source:RGD Symbol;Acc:2894]	25556	Q62611
ENSRNOG00000050997	1067.63	542.397	1592.86	2.93671	1.5542	1.59992e-06	0.000787202	6	60132024	60151420	-	1791	Ifrd1	GO:0005634;GO:0005737;GO:0014706;GO:0030517;GO:0042692;GO:0043403;GO:0048671;	-	-	Z	0DF0F;0V4P9;12NEI;191T8;09TQ4;1CPQ6;1B4E2;0UGAR;KOG2842	interferon-related developmental regulator 1 [Source:RGD Symbol;Acc:2867]	29596	P20695;Q5XIV9
ENSRNOG00000009348	400.773	203.684	597.863	2.93525	1.55348	0.0342065	0.425445	4	7320668	7342410	-	5383	Nos3	GO:0001525;GO:0001542;GO:0001701;GO:0001974;GO:0002028;GO:0003057;GO:0003100;GO:0003180;GO:0003184;GO:0003203;GO:0003785;GO:0004517;GO:0004517;GO:0004517;GO:0005516;GO:0005634;GO:0005737;GO:0005737;GO:0005794;GO:0005886;GO:0005901;GO:0006527;GO:0006809;GO:0006809;GO:0006809;GO:0008285;GO:0010181;GO:0010628;GO:0014740;GO:0014806;GO:0016491;GO:0019430;GO:0020037;GO:0020037;GO:0030324;GO:0031284;GO:…	K13242	EC:1.14.13.39	C	0UFUE;1AVUV;09TG9;1CPGY;0V4FA;12PXV;18T8Z;KOG1158;0DET5	nitric oxide synthase 3 [Source:RGD Symbol;Acc:3186]	24600	Q62600
ENSRNOG00000001469	345.505	175.773	515.237	2.93126	1.55152	1.2767e-05	0.00430413	12	24978483	25021863	+	3588	Eln	GO:0003151;GO:0005201;GO:0005201;GO:0005576;GO:0007519;GO:0030198;GO:0030833;GO:0043149;GO:0050840;GO:0062023;GO:0062023;GO:0071953;GO:0071953;GO:0005201;GO:0005201;GO:0005576;GO:0062023;GO:0062023;	K14211	-	Z;O;W	0UW7Z;0DVKN;147W8;0A9RM;0VKP5;1B71I;1D4X0;196DQ;0IZT8	elastin [Source:RGD Symbol;Acc:67394]	25043	Q99372;D4A9U4
ENSRNOG00000020652	295.173	150.576	439.77	2.92057	1.54625	0.0129729	0.278833	1	82480195	82497199	+	2140	Tgfb1	GO:0000122;GO:0000902;GO:0001570;GO:0001657;GO:0001775;GO:0001843;GO:0002028;GO:0002460;GO:0002513;GO:0003179;GO:0003180;GO:0005160;GO:0005160;GO:0005615;GO:0005615;GO:0006468;GO:0006874;GO:0006954;GO:0007179;GO:0007219;GO:0007492;GO:0007507;GO:0008083;GO:0008283;GO:0008284;GO:0008354;GO:0010468;GO:0010628;GO:0010629;GO:0010718;GO:0010763;GO:0014003;GO:0014008;GO:0016202;GO:0021915;GO:0030217;GO:…	K13375	-	T	KOG3900;0UNC6;1CSH1;18W82;09WHF;12QZ4;1AWCX;0DHSR;0V7FW	transforming growth factor, beta 1 [Source:RGD Symbol;Acc:69051]	59086	P17246
ENSRNOG00000049075	940.179	480.071	1400.29	2.91684	1.5444	9.39192e-05	0.0198814	2	93981656	93985378	-	723	Fabp5	GO:0001972;GO:0005324;GO:0005504;GO:0005576;GO:0005615;GO:0005615;GO:0005634;GO:0005634;GO:0005737;GO:0005737;GO:0006006;GO:0006629;GO:0006656;GO:0008289;GO:0008289;GO:0008289;GO:0009611;GO:0010829;GO:0014069;GO:0014069;GO:0015909;GO:0030054;GO:0031392;GO:0035360;GO:0042593;GO:0042802;GO:0045202;GO:0045202;GO:0051930;GO:0099178;GO:0099178;GO:0120162;GO:0120162;GO:1990379;	K08754	-	I	1D3CW;0A6X7;KOG4015;0UV0G;13SB3;1B5MC;0VHYA;193BM;0DU16	fatty acid binding protein 5 [Source:RGD Symbol;Acc:70997]	140868	P55053
ENSRNOG00000017416	96.8237	49.5034	144.144	2.9118	1.54191	0.021007	0.344397	18	48372041	48384645	-	1353	Ppic	GO:0000413;GO:0000413;GO:0000413;GO:0000413;GO:0000413;GO:0000413;GO:0003755;GO:0003755;GO:0003755;GO:0003755;GO:0003755;GO:0003755;GO:0003755;GO:0003755;GO:0005737;GO:0006457;GO:0006457;GO:0006457;GO:0016018;GO:0016018;GO:0016018;GO:0016853;GO:0043231;	K09563	EC:5.2.1.8	O	KOG0880;0A0D4;1AWFT;0DMWZ;12NWW;0VD55;1CWSQ;0UR4M;18YSQ	peptidylprolyl isomerase C [Source:RGD Symbol;Acc:1303221]	291463	Q6AYQ9
ENSRNOG00000018911	1580.95	809.402	2352.5	2.90647	1.53927	2.2212e-05	0.0067395	17	70684134	70713726	+	4717	Pfkfb3	GO:0000166;GO:0003824;GO:0003824;GO:0003824;GO:0003873;GO:0003873;GO:0003873;GO:0003873;GO:0003873;GO:0004331;GO:0004331;GO:0004331;GO:0004331;GO:0005524;GO:0005524;GO:0005524;GO:0005654;GO:0005829;GO:0006000;GO:0006000;GO:0006003;GO:0006003;GO:0006003;GO:0006003;GO:0006110;GO:0007420;GO:0008152;GO:0016301;GO:0016310;GO:0016311;GO:0016740;GO:0016787;GO:0046835;GO:0000166;GO:0003824;GO:0003824;GO:…	K01103	-	G	1CUMN;0UGYH;09UK4;0DFVS;12R0U;1B4WH;18VXZ;0V5JD;KOG0234	6-phosphofructo-2-kinase/fructose-2,6-biphosphatase 3 [Source:RGD Symbol;Acc:619776]	117276	O35552
ENSRNOG00000009487	30.7105	15.7808	45.6403	2.89214	1.53214	0.0187444	0.326272	2	116105111	116161998	-	1604	Gpr160	GO:0005886;GO:0016021;GO:0043235;	K08438	-	T	0DKB2;0V9VQ;13JQC;0UPAG;1CV6Z;191VR;09YXZ;0IK2K;1B29U	G protein-coupled receptor 160 [Source:RGD Symbol;Acc:1560200]	499588	Q66H29
ENSRNOG00000033256	29.6574	15.258	44.0567	2.88745	1.52979	0.0139478	0.28781	8	22559098	22576154	+	1301	LOC691141	GO:0016020;GO:0016021;	-	-	S	1AXIS;12TU2;0IJQU;1CX8H;0UN2A;0DNBF;0A0Q6;0VBKD;191JI	cDNA sequence AB124611 [Source:MGI Symbol;Acc:MGI:3043001]	691141	D3ZMI7
ENSRNOG00000024569	65.4324	33.6763	97.1886	2.88597	1.52905	0.0352682	0.430921	4	78310379	78313206	+	1694	Gimap9	GO:0000166;GO:0005525;GO:0005525;GO:0005525;GO:0005829;	-	-	S	141RM;1CW8H;0DSJS;0UUPD;194TC;0A4AZ;1B15W;0VEJN;0IM0G	GTPase, IMAP family member 9 [Source:RGD Symbol;Acc:1549762]	493865	Q3ZAV4
ENSRNOG00000011971	293.888	151.889	435.887	2.86977	1.52093	0.000698284	0.0638807	4	157143592	157155609	-	3018	C1s	GO:0004252;GO:0004252;GO:0004252;GO:0005509;GO:0005509;GO:0006508;GO:0006508;GO:0006958;GO:0006958;GO:0008236;GO:0042802;GO:0004252;GO:0004252;GO:0006508;GO:0006508;GO:0006958;GO:0006958;	K01331	EC:3.4.21.42	O;E	09UJW;KOG3627;1CPG5;13HY4;0UQTZ;0DFVH;18VM5;1AXUV;0V5J3	complement C1s [Source:RGD Symbol;Acc:619983]	192262	Q6P6T1
ENSRNOG00000020579	163.296	84.5426	242.05	2.86306	1.51756	0.0494446	0.502226	8	117694605	117726844	+	9170	Col7a1	GO:0003674;GO:0005515;GO:0005575;GO:0005604;GO:0005615;GO:0008150;GO:0035987;GO:0042802;GO:0062023;	K16628	-	W	13IM5;0UGWN;0VCUM;0A01U;1CUGE;KOG3544;0DJPG	collagen type VII alpha 1 chain [Source:RGD Symbol;Acc:1311417]	301012	D3ZE04
ENSRNOG00000019742	2472.28	1282.17	3662.4	2.8564	1.5142	4.04672e-05	0.0105244	10	88790408	88842233	-	4428	Stat3	GO:0000785;GO:0000976;GO:0000978;GO:0000981;GO:0001103;GO:0001228;GO:0001659;GO:0001754;GO:0003677;GO:0003677;GO:0003700;GO:0003700;GO:0003700;GO:0004879;GO:0005634;GO:0005634;GO:0005634;GO:0005654;GO:0005667;GO:0005667;GO:0005737;GO:0005737;GO:0005829;GO:0005886;GO:0006355;GO:0006355;GO:0006366;GO:0006606;GO:0006954;GO:0007165;GO:0008134;GO:0008283;GO:0008285;GO:0010507;GO:0010628;GO:0010628;GO:…	K04692	-	K	1CT96;09X75;13KVM;KOG3667;0DIIK;0V85R;0UN5S;18W5F;1B3J0	signal transducer and activator of transcription 3 [Source:RGD Symbol;Acc:3772]	25125	P52631
ENSRNOG00000004019	520.999	270.237	771.761	2.85587	1.51393	0.0442353	0.480679	7	54247460	54249664	+	1811	Phlda1	GO:0005654;GO:0005730;GO:0005737;GO:0043065;GO:0043065;GO:0045210;GO:1901981;GO:1901981;	K23793	-	W;T;K	0DPZN;1CUM0;1AVA8;0UKP9;13RAY;190R1;0A2BR;0VBRH;0IXHQ	pleckstrin homology-like domain, family A, member 1 [Source:RGD Symbol;Acc:3836]	29380	F1LNT5
ENSRNOG00000031312	465.569	241.541	689.598	2.855	1.51349	0.0100557	0.249457	4	157864969	157877633	+	2136	Tnfrsf1a	GO:0000139;GO:0000139;GO:0003176;GO:0003177;GO:0003332;GO:0005031;GO:0005031;GO:0005031;GO:0005515;GO:0005615;GO:0005794;GO:0005886;GO:0006693;GO:0006693;GO:0006915;GO:0006952;GO:0006954;GO:0006954;GO:0006954;GO:0007165;GO:0007165;GO:0007166;GO:0008630;GO:0009986;GO:0010614;GO:0016020;GO:0016021;GO:0019221;GO:0033209;GO:0033209;GO:0033209;GO:0042531;GO:0042742;GO:0043120;GO:0043123;GO:0043235;GO:…	K03158	-	T;V	0A4Q9;0IXBX;1AXB0;18Y8M;0URHP;0DS6I;0VFJC;1D1FM;13RJQ	TNF receptor superfamily member 1A [Source:RGD Symbol;Acc:621237]	25625	P22934
ENSRNOG00000005275	49.6501	25.8126	73.4877	2.84697	1.50943	0.00313302	0.137801	10	47031050	47059216	-	2046	Shmt1	GO:0000900;GO:0000900;GO:0000900;GO:0003824;GO:0003824;GO:0004372;GO:0004372;GO:0004372;GO:0004372;GO:0004372;GO:0004372;GO:0004372;GO:0005634;GO:0005634;GO:0005654;GO:0005737;GO:0005829;GO:0005829;GO:0005829;GO:0006231;GO:0006544;GO:0006544;GO:0006545;GO:0006563;GO:0006563;GO:0006565;GO:0006565;GO:0006565;GO:0006730;GO:0006730;GO:0008270;GO:0008732;GO:0009113;GO:0009113;GO:0009113;GO:0016597;GO:…	K00600	EC:2.1.2.1	E	1CQ9V;18VIG;0UFK0;0V59M;12NMY;KOG2467;09UAI;1AVTQ;0DFK6	serine hydroxymethyltransferase 1 [Source:RGD Symbol;Acc:1312011]	287379	Q6TXG7
ENSRNOG00000000818	21.0522	10.9786	31.1258	2.83513	1.50341	0.0369602	0.442963	20	3397834	3401315	-	1632	Nrm	GO:0005635;GO:0031965;	-	-	S	0DKZA;1B1YE;1CX2N;1917C;0IVGT;0UNT8;0V9PR;13MHZ;0A49I	nurim [Source:RGD Symbol;Acc:1302966]	361791	Q6MG14
ENSRNOG00000014987	35.1296	18.3604	51.8989	2.82668	1.49911	0.0101835	0.250112	9	15166118	15184468	+	1616	Mdfi	GO:0000122;GO:0005634;GO:0005634;GO:0007257;GO:0008134;GO:0008134;GO:0009950;GO:0030111;GO:0030178;GO:0042802;GO:0042802;GO:0043392;GO:0048704;GO:0048704;GO:0060707;GO:0060707;	-	-	T;K	1CRA3;1ATYB;0IYH9;1926F;0V6B1;0DGK8;09VBR;0UIEC;13PWH	MyoD family inhibitor [Source:RGD Symbol;Acc:1560271]	501097	B0BN88
ENSRNOG00000013745	25.4022	13.2979	37.5065	2.82049	1.49595	0.0228965	0.358102	5	160394580	160405050	-	1198	Ctrc	GO:0004252;GO:0004252;GO:0006508;GO:0006508;GO:0006508;GO:0008233;GO:0008236;GO:0016787;GO:0004252;GO:0004252;GO:0004252;GO:0006508;GO:0006508;GO:0006508;GO:0006508;GO:0006508;GO:0006508;GO:0006874;GO:0006874;GO:0008233;GO:0008233;GO:0008233;GO:0008236;GO:0016787;	K01311	EC:3.4.21.2	O;E	13FPQ;KOG3627;0DGHJ;1CR7B;194KM;0V68J;0UT4K;1AYYE;09V98	chymotrypsin C [Source:RGD Symbol;Acc:1308379]	362653	P55091
ENSRNOG00000000897	42.6271	22.3609	62.8932	2.81264	1.49192	0.00769125	0.213759	12	6016884	6078411	-	2214	Rxfp2	GO:0001556;GO:0004930;GO:0004930;GO:0004930;GO:0005515;GO:0005886;GO:0005886;GO:0005887;GO:0007165;GO:0007165;GO:0007165;GO:0007186;GO:0007186;GO:0007186;GO:0007189;GO:0007189;GO:0007189;GO:0007190;GO:0007193;GO:0008285;GO:0008528;GO:0008584;GO:0008584;GO:0009755;GO:0016020;GO:0016020;GO:0016020;GO:0016021;GO:0016021;GO:0016021;GO:0016500;GO:0016500;GO:0017046;GO:0043066;GO:0043950;	K04307	-	T	KOG0619;0E9KI;0V3XR;13G8H;0B6HY;0WJ8I;KOG2087;197HD;1DGFF;1BBK2	relaxin family peptide receptor 2 [Source:RGD Symbol;Acc:1309449]	363866	Q5ECL0
ENSRNOG00000007350	118.793	62.3289	175.258	2.81182	1.4915	0.0112522	0.261724	7	119783849	119797098	-	1362	Rac2	GO:0003924;GO:0003924;GO:0003924;GO:0003924;GO:0003924;GO:0005525;GO:0005525;GO:0005525;GO:0005525;GO:0005525;GO:0005635;GO:0005635;GO:0005737;GO:0005737;GO:0005829;GO:0005829;GO:0005856;GO:0005884;GO:0005884;GO:0005886;GO:0005938;GO:0006935;GO:0006935;GO:0007015;GO:0007015;GO:0007015;GO:0007163;GO:0007186;GO:0007186;GO:0007264;GO:0007264;GO:0008045;GO:0008284;GO:0008284;GO:0008360;GO:0010592;GO:…	K07860	-	Z;S;T	0V62F;1CTM0;0DIVP;09V2T;18Z63;0UNQQ;1AY79;KOG0393;12N5X	Rac family small GTPase 2 [Source:RGD Symbol;Acc:1307568]	366957	Q5U1Y2
ENSRNOG00000012331	45.7633	24.0422	67.4844	2.80691	1.48898	0.0121176	0.269033	9	65614142	65662106	+	2027	Casp8	GO:0001525;GO:0001525;GO:0001817;GO:0001841;GO:0004175;GO:0004197;GO:0004197;GO:0004197;GO:0004197;GO:0005123;GO:0005164;GO:0005515;GO:0005515;GO:0005515;GO:0005634;GO:0005634;GO:0005654;GO:0005737;GO:0005737;GO:0005737;GO:0005829;GO:0005829;GO:0005886;GO:0006508;GO:0006508;GO:0006508;GO:0006508;GO:0006508;GO:0006915;GO:0006915;GO:0006915;GO:0006915;GO:0006915;GO:0006915;GO:0006919;GO:0006919;GO:…	K04398	EC:3.4.22.61	D	1AU0M;0DJ9B;0V8U3;1CU1B;09XWN;18USC;0UM29;KOG3573;12T3F	caspase 8 [Source:RGD Symbol;Acc:620945]	64044	Q9JHX4
ENSRNOG00000013747	133.61	70.2557	196.963	2.80352	1.48724	0.00021868	0.0350786	14	81435449	81472952	-	2859	Sh3bp2	GO:0001784;GO:0007165;	K07984	-	T	19132;0IGI1;12U6S;0A1YH;0UFFD;1CX22;0DN5J;1ARC7;0VCE6	SH3-domain binding protein 2 [Source:RGD Symbol;Acc:1310588]	305450	F1LS93
ENSRNOG00000033335	29.35	15.4607	43.2393	2.79672	1.48373	0.0177373	0.318673	X	105147153	105198797	+	3333	Cenpi	GO:0000775;GO:0000776;GO:0000776;GO:0005634;GO:0005694;GO:0034508;GO:0034508;GO:0000775;GO:0000776;GO:0000776;GO:0000776;GO:0005634;GO:0005694;GO:0005829;GO:0016604;GO:0034508;GO:0034508;	K11501	-	S	0VCSM;13JX1;1B0VK;09ZD9;18WM0;0IEZD;1CZQQ;0UT01;0DQMZ	centromere protein I [Source:RGD Symbol;Acc:2631]	25448	Q63517
ENSRNOG00000037113	273.53	144.195	402.864	2.79388	1.48227	0.00707983	0.20491	10	70370300	70376331	+	1772	Slfn2	GO:0008285;GO:0009617;	K24457	-	S	1D111;1423J;19473;0A069;1B7CR;0VDXK;0JAUV;0DRSW;0UUIB	schlafen 2 [Source:RGD Symbol;Acc:1308645]	303380	D4A2D6
ENSRNOG00000054218	23.6633	12.5111	34.8156	2.78278	1.47653	0.0291465	0.393553	9	47225585	47258503	+	5305	Il18rap	GO:0005515;GO:0005575;GO:0007165;GO:0007165;GO:0008283;GO:0008283;GO:0016020;GO:0016021;GO:0035655;GO:0035655;GO:0035655;GO:0035655;GO:0042007;GO:0042008;GO:0042008;GO:0042008;GO:0042119;GO:0042119;GO:0045092;GO:0045092;GO:0045954;GO:0045954;GO:0051092;GO:0051092;GO:0051092;GO:0070301;GO:0071345;GO:0071351;GO:0071351;	K05174	-	-	-	interleukin 18 receptor accessory protein [Source:RGD Symbol;Acc:727867]	373540	A0A0G2K2K7
ENSRNOG00000018087	4249.28	2248.7	6249.86	2.77932	1.47473	0.0292556	0.393553	17	80882666	80891212	+	1857	Vim	GO:0003725;GO:0005200;GO:0005200;GO:0005212;GO:0005737;GO:0005737;GO:0005777;GO:0005829;GO:0005844;GO:0005856;GO:0005882;GO:0005882;GO:0005882;GO:0005882;GO:0005882;GO:0005886;GO:0005886;GO:0010628;GO:0010977;GO:0014002;GO:0016020;GO:0016363;GO:0019904;GO:0031252;GO:0032967;GO:0042802;GO:0042995;GO:0043005;GO:0043488;GO:0045103;GO:0045109;GO:0045111;GO:0045335;GO:0045727;GO:0060020;GO:0060395;GO:…	K07606	-	Z	0UPDZ;18SYV;1CU69;09YCR;12RK9;0V9A9;0DJSK;1B0A8;0IFZ1	vimentin [Source:RGD Symbol;Acc:621646]	81818	P31000
ENSRNOG00000017212	785.618	418.116	1153.12	2.75789	1.46357	1.04217e-05	0.00364861	5	166913735	166926636	-	2989	Spsb1	GO:0005515;GO:0005829;GO:0005829;GO:0006511;GO:0006511;GO:0016567;GO:0016567;GO:0016567;GO:0019005;GO:0043161;GO:1990756;GO:1990756;GO:0005515;GO:0005829;GO:0006511;GO:0016567;GO:0016567;GO:0019005;GO:0043161;GO:1990756;	K10343	-	O;J	KOG3953;1CRWB;0V6W6;12P0S;0DH66;09VXP	splA/ryanodine receptor domain and SOCS box containing 1 [Source:RGD Symbol;Acc:1309319]	313722	B0BMX8
ENSRNOG00000056216	121.525	64.8026	178.247	2.75062	1.45975	0.00152001	0.0941214	1	277190964	277242774	+	2431	Casp7	GO:0004190;GO:0004190;GO:0004197;GO:0004197;GO:0004197;GO:0004197;GO:0004197;GO:0005634;GO:0005634;GO:0005737;GO:0005737;GO:0005829;GO:0005829;GO:0006508;GO:0006508;GO:0006508;GO:0006508;GO:0006508;GO:0006915;GO:0006915;GO:0006915;GO:0006915;GO:0006915;GO:0007507;GO:0007507;GO:0007568;GO:0008233;GO:0008233;GO:0008233;GO:0008234;GO:0008234;GO:0008234;GO:0008234;GO:0009411;GO:0009411;GO:0016485;GO:…	K04397	EC:3.4.22.60	-	-	caspase 7 [Source:RGD Symbol;Acc:620944]	64026	O88550
ENSRNOG00000058186	1492.09	795.723	2188.45	2.75026	1.45957	0.0455047	0.484785	5	167952728	167966009	+	2980	Errfi1	GO:0005737;GO:0005829;GO:0007175;GO:0007175;GO:0019901;GO:0031234;GO:0031953;GO:0042059;GO:0043589;GO:0045616;GO:0048286;GO:0060426;GO:0060428;	-	-	-	-	ERBB receptor feedback inhibitor 1 [Source:RGD Symbol;Acc:1307599]	313729	P05432
ENSRNOG00000052357	114.812	61.3711	168.253	2.74157	1.455	0.0104159	0.253844	6	25598936	25616995	-	744	Fosl2	GO:0000977;GO:0001228;GO:0003677;GO:0003700;GO:0005654;GO:0006355;GO:0006357;GO:0045944;	-	-	-	-	FOS like 2, AP-1 transcription factor subunit [Source:RGD Symbol;Acc:2628]	-	-
ENSRNOG00000056746	48.743	26.0563	71.4298	2.74136	1.45489	0.00444116	0.163312	2	193778042	193783761	+	4683	Tchh	GO:0005509;GO:0045109;GO:0046914;	-	-	-	-	trichohyalin [Source:RGD Symbol;Acc:1309635]	-	-
ENSRNOG00000024846	216.535	115.781	317.289	2.74043	1.4544	0.0120593	0.268386	3	9036373	9037942	-	1570	Ier5l	-	-	-	S	0VDIM;0UGY2;0DQA9;1B49A;18ZFQ;0A2NR;0J77W;1CZCB;13Z3R	immediate early response 5-like [Source:RGD Symbol;Acc:1561058]	499772	Q5PQP0
ENSRNOG00000058276	66.987	35.8336	98.1403	2.73877	1.45353	0.00935401	0.241204	19	26416818	26417597	+	315	AABR07043200.1	-	-	-	-	-	-	-	-
ENSRNOG00000013148	25.7979	13.8316	37.7641	2.73028	1.44905	0.0301008	0.399779	5	134948512	134978125	-	2794	Rad54l	GO:0000166;GO:0000724;GO:0000724;GO:0000733;GO:0003674;GO:0005524;GO:0005524;GO:0005524;GO:0005575;GO:0005634;GO:0005654;GO:0006302;GO:0006302;GO:0006974;GO:0006974;GO:0008150;GO:0008340;GO:0008340;GO:0010212;GO:0010212;GO:0016787;GO:0032991;GO:0032991;GO:0036310;GO:0036310;GO:0042493;GO:0042493;GO:0051276;GO:0051276;GO:0070615;	K10875	EC:3.6.4.-	L	1AVQC;09XTC;190Z5;0V8QW;1CZF2;0UQN1;12PSK;KOG0390;0DKJ5	RAD54 like [Source:RGD Symbol;Acc:1310600]	298429	B5DFE8
ENSRNOG00000021161	135.911	73.0803	198.742	2.7195	1.44334	0.00321032	0.139484	1	222254184	222272285	-	2455	Fermt3	GO:0002102;GO:0002102;GO:0003674;GO:0005178;GO:0005178;GO:0005178;GO:0005575;GO:0007155;GO:0007159;GO:0007159;GO:0007159;GO:0007159;GO:0007160;GO:0007229;GO:0007229;GO:0007229;GO:0007229;GO:0008150;GO:0030055;GO:0030335;GO:0030335;GO:0033622;GO:0033622;GO:0033622;GO:0033622;GO:0033632;GO:0033632;GO:0033632;GO:0033632;GO:0034446;GO:0034446;GO:0070527;GO:0070527;GO:0070527;	K17084	-	Z;D	0UN6Z;0V5AY;09Y5C;1D028;0DGY8;KOG3727;18SGF;12RPR;1B4RC	fermitin family member 3 [Source:RGD Symbol;Acc:1310168]	309186	B2GVB9
ENSRNOG00000011039	47.8778	25.8201	69.9355	2.70856	1.43753	0.0276077	0.38931	15	23934585	23969011	-	1482	Gch1	GO:0000166;GO:0003824;GO:0003924;GO:0003924;GO:0003934;GO:0003934;GO:0003934;GO:0003934;GO:0003934;GO:0003934;GO:0003934;GO:0003934;GO:0005509;GO:0005515;GO:0005515;GO:0005525;GO:0005525;GO:0005525;GO:0005525;GO:0005634;GO:0005634;GO:0005634;GO:0005654;GO:0005737;GO:0005737;GO:0005737;GO:0005737;GO:0005829;GO:0005829;GO:0006729;GO:0006729;GO:0006729;GO:0006729;GO:0008152;GO:0008217;GO:0008217;GO:…	K01495	EC:3.5.4.16	H	1CTUV;18VF5;KOG2698;1AUDU;0V7I8;13HKT;0DJ34;0UKZG;09WJK	GTP cyclohydrolase 1 [Source:RGD Symbol;Acc:61992]	29244	P22288
ENSRNOG00000019851	32.1925	17.3839	47.0011	2.70371	1.43494	0.022645	0.355913	1	199624037	199624783	-	475	Cox6a2	GO:0004129;GO:0004129;GO:0005739;GO:0005743;GO:0005743;GO:0005743;GO:0005751;GO:0005751;GO:0006119;GO:0016020;GO:0016021;GO:0016491;GO:0022900;GO:1902600;	K02266	-	C	KOG3469;1D4BH;0DV0V;0VJC1;1B676;13U02;0A8FX;0UW11;193NI	cytochrome c oxidase subunit 6A2 [Source:RGD Symbol;Acc:2385]	25278	G3V8M4
ENSRNOG00000023931	20.004	10.8094	29.1986	2.70123	1.43361	0.0415129	0.468044	1	88113445	88116548	+	2411	Ggn	GO:0005730;GO:0005737;GO:0006302;GO:0006302;GO:0006302;GO:0007275;GO:0007276;GO:0007276;GO:0007276;GO:0007283;GO:0007566;GO:0008104;GO:0030154;GO:0031625;GO:0031625;GO:0042802;GO:0048471;	-	-	Z;U	0UTNV;18WPT;0A2S6;0DQE3;1CZG2;0VDMU;0IVS8;1AURG;13M56	gametogenetin [Source:RGD Symbol;Acc:1306765]	292765	Q66HC8
ENSRNOG00000022839	144.181	78.0214	210.341	2.69594	1.43079	0.000263962	0.0372513	1	252906234	252911382	+	2045	Ifit3	GO:0003723;GO:0005515;GO:0005737;GO:0005737;GO:0005739;GO:0005829;GO:0005829;GO:0008285;GO:0008285;GO:0009615;GO:0009615;GO:0009617;GO:0035457;GO:0035457;GO:0035458;GO:0035634;GO:0042802;GO:0042802;GO:0043066;GO:0043066;GO:0051607;	K24849	-	T;P	1AVY2;0UPM4;18T62;1CVFR;12U68;0DKMA;KOG1124;09Z5A;0VA2H	interferon-induced protein with tetratricopeptide repeats 3 [Source:RGD Symbol;Acc:1359681]	309526	Q6AYE7
ENSRNOG00000004210	100.477	54.3909	146.563	2.69463	1.43009	0.0190202	0.328221	6	35314444	35321667	+	2188	Osr1	GO:0000122;GO:0001655;GO:0001656;GO:0001657;GO:0001823;GO:0002062;GO:0005634;GO:0007507;GO:0008406;GO:0010628;GO:0030154;GO:0030501;GO:0030857;GO:0035115;GO:0035116;GO:0036023;GO:0042474;GO:0042476;GO:0042733;GO:0043066;GO:0045944;GO:0048389;GO:0048793;GO:0048863;GO:0050679;GO:0060021;GO:0060272;GO:0071300;GO:0072075;GO:0072111;GO:0072133;GO:0072143;GO:0072162;GO:0072166;GO:0072168;GO:0072169;GO:…	K09215	-	K	0V4EH;1CPG6;12SBE;KOG1721;09TFE;0DESF;0UR5A;1B4YC;18XWW	odd-skipped related transcription factor 1 [Source:RGD Symbol;Acc:1311807]	298878	B0K011
ENSRNOG00000019018	1600.54	866.464	2334.61	2.69442	1.42997	0.0407297	0.46488	16	74098260	74122889	-	2542	Plat	GO:0004252;GO:0005576;GO:0006508;GO:0014909;GO:0031639;	K01343	EC:3.4.21.68	O;E	1909H;13BE1;09ZAN;KOG3627;0VA80;0DKSZ;1AZH1;0UN2I;1CVMT	plasminogen activator, tissue type [Source:RGD Symbol;Acc:3342]	25692	P19637
ENSRNOG00000021243	22.3298	12.1224	32.5373	2.68406	1.42442	0.0416076	0.468044	3	123612067	123631109	-	7183	Siglec1	GO:0005769;GO:0005770;GO:0005886;GO:0016020;GO:0016021;GO:0030246;GO:0046790;GO:0070234;GO:0075512;GO:2001238;GO:0005769;GO:0005770;GO:0005886;GO:0016020;GO:0016021;GO:0046790;GO:0070234;GO:0075512;GO:2001238;	K06548	-	T	0IUGH	sialic acid binding Ig like lectin 1 [Source:RGD Symbol;Acc:1311953]	311426	D3ZVM6
ENSRNOG00000058047	91.6144	49.8178	133.411	2.67798	1.42114	0.00135095	0.0889325	1	24854907	24858316	-	576	AABR07000733.1	-	-	-	-	-	-	-	-
ENSRNOG00000023013	176.767	96.154	257.381	2.67676	1.42049	0.000190059	0.0332695	18	51844976	52017734	-	1934	Marchf3	GO:0008270;GO:0005764;GO:0005768;GO:0008270;GO:0043231;	K10658	EC:2.3.2.27	A;O	0A486;1CZ1N;0VD9D;KOG1609;19589;13VEV;0UFPJ;1B55H;0DQ11	membrane associated ring-CH-type finger 3 [Source:RGD Symbol;Acc:1359308]	364878	Q5XIE5
ENSRNOG00000022099	23.6111	12.846	34.3762	2.67603	1.42009	0.0414521	0.468044	1	199449973	199457895	+	2391	Trim72	GO:0001778;GO:0001778;GO:0001786;GO:0003012;GO:0005515;GO:0007517;GO:0008270;GO:0010832;GO:0030659;GO:0031624;GO:0042383;GO:0042802;GO:0043161;GO:0043569;GO:0046627;GO:0046627;GO:0051260;GO:0061630;GO:0061630;	K12036	-	O;U	KOG2177;0V48I;09T9F;12SJ0;0UFJR;18UKC;0DEKP;1B1JG;1CPAJ	tripartite motif containing 72 [Source:RGD Symbol;Acc:1562778]	365377	A0JPQ4
ENSRNOG00000013167	176.442	96.1126	256.771	2.67157	1.41769	0.0318248	0.411485	16	36077617	36080191	-	1152	Hmgb2	GO:0003677;GO:0005634;	K11295	-	K;B	0UGBY;09Z4C;KOG0381;0DF62;0VDMV;194UU;12T0N;1ARPK;1CPVN	high mobility group box 2 [Source:RGD Symbol;Acc:69291]	29395	P52925
ENSRNOG00000001704	43.2679	23.5696	62.9662	2.6715	1.41765	0.0183749	0.324295	11	32769165	33003021	-	2266	Runx1	GO:0003677;GO:0003700;GO:0005524;GO:0005634;GO:0006355;GO:0003677;GO:0003700;GO:0005524;GO:0005634;GO:0006355;	K08367	-	K	09TMW;195EI;1AYEY;1CPN2;0DEYC;1395F;KOG3982;0V4KY;0UNXB	RUNX family transcription factor 1 [Source:RGD Symbol;Acc:2283]	50662	Q63046
ENSRNOG00000013170	132.998	72.4501	193.546	2.67144	1.41762	0.00403984	0.156479	X	122724129	122781479	+	1281	Il13ra1	GO:0002639;GO:0004896;GO:0004896;GO:0004896;GO:0004923;GO:0004924;GO:0005127;GO:0005515;GO:0005575;GO:0008284;GO:0009897;GO:0016020;GO:0016020;GO:0016020;GO:0016021;GO:0016515;GO:0019221;GO:0019955;GO:0030890;GO:0035772;GO:0038165;GO:0043235;GO:0048861;	K05076	-	W;T	0IH4K;0UPWG;1CYDQ;18ZBP;1AYWF;0DPFH;0A1TB;0VCP3;13MHI	interleukin 13 receptor subunit alpha 1 [Source:RGD Symbol;Acc:628741]	252963	Q561K3
ENSRNOG00000037851	130.252	70.9697	189.535	2.67065	1.41719	0.000392869	0.0462199	11	89009931	89260297	-	3084	Spidr	GO:0000228;GO:0000228;GO:0000724;GO:0000724;GO:0005654;GO:0006974;GO:0010569;GO:0031334;GO:0070202;GO:0070202;GO:0071479;GO:0072711;GO:0072757;GO:2000781;GO:0000228;GO:0000228;GO:0000228;GO:0000724;GO:0000724;GO:0000724;GO:0005654;GO:0005654;GO:0006974;GO:0006974;GO:0010569;GO:0010569;GO:0031334;GO:0031334;GO:0070202;GO:0070202;GO:0070202;GO:0071479;GO:0071479;GO:0072711;GO:0072711;GO:0072757;GO:…	K22806	-	S	1CWAA;0IGEG;0DMF3;09ZWG;0VAT3;12SCD;18YMA;0UU50;1B4RP	scaffold protein involved in DNA repair [Source:RGD Symbol;Acc:1566036]	498119	A2VD15
ENSRNOG00000039754	187.055	101.945	272.164	2.66971	1.41668	0.000175684	0.0319832	13	48455923	48482138	+	2583	Rab7b	GO:0003924;GO:0003924;GO:0005525;GO:0005525;GO:0005764;GO:0005764;GO:0005764;GO:0005764;GO:0005770;GO:0005770;GO:0005770;GO:0005770;GO:0005794;GO:0005794;GO:0005802;GO:0005802;GO:0008333;GO:0032755;GO:0032755;GO:0034144;GO:0034144;GO:0034164;GO:0034164;GO:0034499;GO:0034499;GO:0045335;GO:0045335;GO:0045335;GO:0045335;GO:0045654;GO:0045654;GO:0051092;GO:0051092;GO:0071346;GO:0071346;GO:0090385;	K07898	-	U	1CWAW;1B46X;0UTM1;09ZWZ;13NHB;0VATI;1900B;KOG0394;0DMFK	Rab7b, member RAS oncogene family [Source:RGD Symbol;Acc:1562617]	501854	D4A7A8
ENSRNOG00000010319	708.233	386.414	1030.05	2.66567	1.4145	0.00150612	0.0939004	15	57221292	57277811	+	3637	Lcp1	GO:0001725;GO:0001726;GO:0001891;GO:0002102;GO:0002286;GO:0003674;GO:0003779;GO:0005178;GO:0005509;GO:0005509;GO:0005515;GO:0005575;GO:0005737;GO:0005737;GO:0005884;GO:0005884;GO:0005925;GO:0010737;GO:0015629;GO:0016477;GO:0022617;GO:0030175;GO:0031100;GO:0032432;GO:0032432;GO:0033157;GO:0042802;GO:0048471;GO:0051015;GO:0051015;GO:0051015;GO:0051015;GO:0051017;GO:0051017;GO:0051017;GO:0051017;GO:…	K17276	-	Z	0V55N;12U9H;1CRV4;09VWS;KOG0046;1AX42;0DH4W;18VE7;0UMME	lymphocyte cytosolic protein 1 [Source:RGD Symbol;Acc:1308288]	306071	Q5XI38
ENSRNOG00000002568	21.7705	11.9328	31.6083	2.64886	1.40537	0.0428992	0.474472	10	4957326	4958461	+	1136	Socs1	GO:0001817;GO:0001932;GO:0005159;GO:0005654;GO:0005737;GO:0005737;GO:0007259;GO:0009968;GO:0010533;GO:0016567;GO:0019210;GO:0019221;GO:0019901;GO:0033673;GO:0035556;GO:0035556;GO:0036464;GO:0040008;GO:0042509;GO:0042532;GO:0042532;GO:0043372;GO:0043377;GO:0045444;GO:0045591;GO:0046425;GO:0046426;GO:0046426;GO:0046426;GO:0046426;GO:0046627;GO:0060334;GO:0060334;GO:0071230;	K04694	-	T	0UNSY;13F34;18ZJU;1AUZ2;KOG4566;1CUR4;0DJXM;0A2EF;0VDA1	suppressor of cytokine signaling 1 [Source:RGD Symbol;Acc:69272]	252971	G3V6B4
ENSRNOG00000013634	191.981	105.345	278.617	2.64481	1.40316	0.000305942	0.0409535	8	128022473	128026841	-	2457	Myd88	GO:0002238;GO:0002269;GO:0002283;GO:0002755;GO:0002755;GO:0005149;GO:0005515;GO:0005634;GO:0005737;GO:0005829;GO:0005886;GO:0006909;GO:0006909;GO:0006915;GO:0006954;GO:0007165;GO:0007166;GO:0009615;GO:0009682;GO:0010468;GO:0010628;GO:0016064;GO:0031663;GO:0032481;GO:0032494;GO:0032496;GO:0032675;GO:0032680;GO:0032722;GO:0032740;GO:0032747;GO:0032755;GO:0032757;GO:0032760;GO:0035325;GO:0042127;GO:…	K04729	-	T;K	12SM9;0A237;1CWEU;0UQSF;191S8;0VCYQ;0IIN8;0DFRX;1B0YG	MYD88, innate immune signal transduction adaptor [Source:RGD Symbol;Acc:735043]	301059	Q6Y1S1
ENSRNOG00000056457	11368.3	6261.43	16475.2	2.63122	1.39573	0.0146107	0.292208	7	141370491	141377928	+	2871	Gpd1	GO:0004367;GO:0004367;GO:0005975;GO:0006072;GO:0006072;GO:0006094;GO:0006116;GO:0006127;GO:0009331;GO:0016491;GO:0016616;GO:0042803;GO:0045821;GO:0046168;GO:0051287;GO:0055114;GO:0071320;GO:0071356;	K00006	EC:1.1.1.8	-	-	glycerol-3-phosphate dehydrogenase 1 [Source:RGD Symbol;Acc:621381]	60666	O35077
ENSRNOG00000050473	159.85	88.0654	231.635	2.63026	1.3952	0.0175448	0.31676	8	72741155	72746090	+	704	Rps27l	GO:0003735;GO:0005634;GO:0005840;GO:0006412;GO:0006919;GO:0006978;GO:0008494;GO:0008656;GO:0031571;GO:0042771;GO:0045727;GO:0003735;GO:0005840;GO:0006412;	K02978	-	J;L	1B68E;0VJ41;KOG1779;0UVTA;0A88C;193V9;1D45G;0DUUM;13UE8	ribosomal protein S27-like [Source:RGD Symbol;Acc:1595396]	681429	P24051
ENSRNOG00000016316	155.57	85.7125	225.428	2.63005	1.39509	0.000535019	0.055884	4	120825699	120840111	-	3261	Mcm2	GO:0000785;GO:0003677;GO:0003688;GO:0005524;GO:0005634;GO:0005634;GO:0005634;GO:0005654;GO:0005664;GO:0005737;GO:0006260;GO:0006268;GO:0006270;GO:0006270;GO:0006334;GO:0006915;GO:0019899;GO:0032508;GO:0042393;GO:0042555;GO:0042555;GO:0071353;GO:0090102;GO:1905775;	K02540	EC:3.6.4.12	L	12NMS;0VB69;1B39U;0UFCG;KOG0477;18XEB;0DQBE;0A0AA;1CZDC	minichromosome maintenance complex component 2 [Source:RGD Symbol;Acc:1305577]	312538	D3ZP96
ENSRNOG00000033697	95.1605	52.4327	137.888	2.62982	1.39496	0.00119701	0.0828259	8	2635851	2651652	+	1223	Casp4	GO:0004197;GO:0006508;GO:0008234;GO:0042981;	K04394	-	D	1ARQT;0VAES;1CVVC;12S0S;0UFW8;0DM0G;18SGZ;09WHC;KOG3573	caspase 4 [Source:RGD Symbol;Acc:621757]	114555	Q3MHS1
ENSRNOG00000012546	385.185	212.352	558.017	2.62779	1.39385	0.000596137	0.0583477	5	60809762	60837764	+	4405	Frmpd1	GO:0005515;GO:0005575;GO:0005856;GO:0005856;GO:0005886;GO:0005886;GO:0005886;GO:0005938;GO:0005938;GO:0005938;GO:0007165;GO:0007165;GO:0008150;GO:0008277;GO:0008277;GO:0032991;GO:0032991;GO:0090150;GO:0090150;	K23954	-	S;O;T	1CV4E;18Z3W;0DKAH;KOG3552;0V7SU;12QFH;0UJ3R;09WUV;1AWKT	FERM and PDZ domain containing 1 [Source:RGD Symbol;Acc:1305229]	313244	-
ENSRNOG00000002434	626.589	345.849	907.328	2.62348	1.39148	3.65276e-05	0.00977918	10	77537340	77543192	+	1396	Tmem100	GO:0001525;GO:0001570;GO:0001701;GO:0003197;GO:0003198;GO:0005783;GO:0005886;GO:0005886;GO:0007219;GO:0030509;GO:0043204;GO:0043204;GO:0043491;GO:0045603;GO:0048471;GO:0048471;GO:0050848;GO:0051930;GO:0060842;GO:0071773;GO:2001214;	-	-	S;T	13S2Z;0VICE;1D3N3;0IY9U;193GG;0DUAE;0A7HJ;1B5NJ;0UVGD	transmembrane protein 100 [Source:RGD Symbol;Acc:1560541]	497979	Q569C0
ENSRNOG00000024566	59.4237	32.8132	86.0342	2.62194	1.39063	0.00454869	0.164958	5	144162141	144176807	-	1896	Sh3d21	GO:0005515;	K23715	-	T	0VFSH;1D12S;0DF5D;1AVVG;13RES;KOG4348;0URPF;0A5IV;194GD	SH3 domain containing 21 [Source:RGD Symbol;Acc:1305090]	362598	B1WC96;F6PUS4
ENSRNOG00000016416	971.88	539.384	1404.38	2.60367	1.38054	0.00028034	0.0386636	1	214151338	214163808	-	1873	Rnh1	GO:0005515;GO:0005737;GO:0005515;GO:0005737;GO:0005515;GO:0005654;GO:0005737;GO:0005829;GO:0008428;GO:0032311;GO:0043086;GO:0045765;	K16634	-	S;T;I	1CTJT;0UMG5;12QJ4;0DIUG;1AZPP;KOG4308;0V8F0;09XGZ;18VH9	ribonuclease/angiogenin inhibitor 1 [Source:RGD Symbol;Acc:621398]	100360501	P29315;E2RUH2
ENSRNOG00000000816	134.851	74.9215	194.781	2.5998	1.3784	0.0190968	0.328909	20	3372413	3397039	-	2840	Ppp1r18	GO:0019902;GO:0019902;GO:0019902;GO:0019902;	K17559	-	T	0URT8;1B17F;1CXYE;0IJQY;0DP0N;0VC8J;0A1D2;13NRZ;191WJ	protein phosphatase 1, regulatory subunit 18 [Source:RGD Symbol;Acc:1309543]	361790	G3V629
ENSRNOG00000002403	61.5999	34.2694	88.9304	2.59504	1.37575	0.0283863	0.391021	13	68949665	69101588	+	3622	Niban1	GO:0001933;GO:0001934;GO:0005737;GO:0005829;GO:0005886;GO:0034976;GO:0045727;	-	-	O;K	0IFR1;0UHQK;190MQ;1AVID;0DHAS;09X6Z;0V85K;13HCM;1CS0W	niban apoptosis regulator 1 [Source:RGD Symbol;Acc:71088]	63912	Q9ESN0
ENSRNOG00000000655	197.706	110.021	285.391	2.59398	1.37517	0.0140692	0.288382	13	55061562	55173692	-	5050	Ptprc	GO:0002244;GO:0002639;GO:0004725;GO:0004725;GO:0005515;GO:0005886;GO:0006469;GO:0006470;GO:0006933;GO:0009897;GO:0009986;GO:0016311;GO:0016791;GO:0019901;GO:0030506;GO:0030507;GO:0030890;GO:0032059;GO:0032677;GO:0044770;GO:0046425;GO:0048539;GO:0048864;GO:0050764;GO:0050852;GO:0050852;GO:0061097;GO:2000473;GO:2000648;GO:0004725;GO:0005515;GO:0006470;GO:0016311;GO:0016791;GO:0050852;GO:0004725;GO:…	K06478	EC:3.1.3.48	T;V	09X67;0V9ZZ;0DIIC;1AWIC;12SQH;KOG4228;195KQ;0UM2Q;1CT8Z	protein tyrosine phosphatase, receptor type, C [Source:RGD Symbol;Acc:3451]	24699	P04157
ENSRNOG00000027784	110.203	61.4175	158.988	2.58864	1.3722	0.00791187	0.217248	1	163317282	163328591	-	2573	Tsku	GO:0005515;GO:0005615;GO:0008203;GO:0010468;GO:0010977;GO:0021540;GO:0021670;GO:0021766;GO:0021960;GO:0030178;GO:0032911;GO:0033344;GO:0042060;GO:0042632;GO:0042635;GO:0043010;GO:0050431;GO:0060122;GO:0061073;GO:0097009;GO:1904761;	K08130	-	T	1ASKI;KOG0619;137ET;0V58N;1CQ8Y;09U9H;0DFJ7;18Y56;0UGX7	tsukushi, small leucine rich proteoglycan [Source:RGD Symbol;Acc:1359311]	308843	Q6QMY6
ENSRNOG00000011683	75.6497	42.1849	109.114	2.58658	1.37104	0.00220513	0.114698	1	142174648	142183884	-	2799	Fes	GO:0000166;GO:0001578;GO:0001578;GO:0004672;GO:0004672;GO:0004672;GO:0004672;GO:0004713;GO:0004713;GO:0004713;GO:0004713;GO:0004713;GO:0004713;GO:0004714;GO:0004715;GO:0004715;GO:0004715;GO:0004715;GO:0005102;GO:0005524;GO:0005524;GO:0005524;GO:0005737;GO:0005737;GO:0005737;GO:0005856;GO:0005886;GO:0005925;GO:0005925;GO:0006468;GO:0006468;GO:0006935;GO:0007098;GO:0007098;GO:0007155;GO:0007169;GO:…	K07527	EC:2.7.10.2	Z;T	0DF0D;1ARXF;0V4P6;18SQH;0UG4F;KOG0194;09TQ2;1CPQ4;12U0U	FES proto-oncogene, tyrosine kinase [Source:RGD Symbol;Acc:1564385]	361597	D4A584
ENSRNOG00000023991	42.448	23.7091	61.1869	2.58073	1.36778	0.0112291	0.261724	16	83358116	83382326	+	1478	Rab20	GO:0003924;GO:0003924;GO:0003924;GO:0005525;GO:0005525;GO:0005794;GO:0006886;GO:0012505;GO:0043231;GO:0045335;GO:0045335;GO:0045335;GO:0071346;GO:0071346;GO:0090383;GO:0090383;GO:0090385;GO:0090385;	K07911	-	U	KOG0092;1AX7E;13KBU;0A33U;1D1QP;18XG2;0UMR3;0VFVB;0DSF1	RAB20, member RAS oncogene family [Source:RGD Symbol;Acc:1593487]	689377	D4AAE6
ENSRNOG00000059406	664.621	371.669	957.572	2.57641	1.36536	0.028256	0.390882	13	72742210	72744303	-	2094	Ier5	GO:0000159;GO:0005634;GO:0005654;GO:0005730;GO:0005737;GO:0034605;GO:0042127;GO:0042802;GO:0045944;GO:1900036;GO:0000159;GO:0005634;GO:0005737;GO:0034605;GO:0042127;GO:0042802;GO:0045944;GO:1900036;	-	-	-	-	immediate early response 5 [Source:RGD Symbol;Acc:69252]	498256	A0A1W2Q6P5
ENSRNOG00000015382	297.052	166.322	427.782	2.57202	1.3629	0.0233108	0.361242	9	42871950	42884855	+	2692	Arid5a	GO:0000122;GO:0000122;GO:0000976;GO:0002062;GO:0003677;GO:0003677;GO:0003682;GO:0003714;GO:0003714;GO:0005634;GO:0005634;GO:0005634;GO:0005654;GO:0005667;GO:0005730;GO:0006357;GO:0008134;GO:0008134;GO:0030331;GO:0030331;GO:0032729;GO:0032740;GO:0032755;GO:0032760;GO:0035066;GO:0035613;GO:0042802;GO:0042802;GO:0043565;GO:0043565;GO:0045944;GO:0046965;GO:0046965;GO:0046966;GO:0046966;GO:0050681;GO:…	-	-	K	KOG2744	AT-rich interaction domain 5A [Source:RGD Symbol;Acc:1311041]	316327	Q3KRC8
ENSRNOG00000014900	367.038	205.509	528.566	2.57198	1.36288	0.010694	0.256768	17	57031766	57090888	+	4664	Crem	GO:0000122;GO:0000977;GO:0000978;GO:0000978;GO:0000981;GO:0001227;GO:0003677;GO:0003677;GO:0003677;GO:0003677;GO:0003677;GO:0003700;GO:0003700;GO:0005515;GO:0005634;GO:0005634;GO:0005634;GO:0005634;GO:0005634;GO:0005667;GO:0005667;GO:0005667;GO:0005737;GO:0006006;GO:0006355;GO:0006355;GO:0006355;GO:0006357;GO:0006631;GO:0006687;GO:0006687;GO:0007283;GO:0007283;GO:0007623;GO:0019933;GO:0032922;GO:…	K09052	-	K	12R42;0V8T7;0UMXC;1CU02;09XVM;1ASSH;KOG3584;192YH;0DJ85	cAMP responsive element modulator [Source:RGD Symbol;Acc:2402]	25620	Q03061;A0A0G2JYV9
ENSRNOG00000024363	149.783	83.8659	215.701	2.57197	1.36288	0.0239332	0.365218	1	84293102	84296367	+	1167	Sertad1	GO:0005634;GO:0005634;GO:0005634;GO:0005634;GO:0005737;GO:0005737;GO:0005737;GO:0030308;GO:0045893;GO:0045893;GO:0045944;GO:0045944;GO:0048096;	-	-	K	0J0C8;0A3GM;13UTA;0DM1H;1929N;1CZGU;0VEBK;1AYJ2;0UP0P	SERTA domain containing 1 [Source:RGD Symbol;Acc:1549778]	361526	Q6P771
ENSRNOG00000047137	2843.22	1595.05	4091.39	2.56505	1.35899	0.000247116	0.0365152	2	33881024	33920837	-	5718	Erbin	GO:0005176;GO:0005515;GO:0007165;GO:0032088;	K12796	-	S;T	0KCZ0;0WCG7;0E5H1;14T4V;1DCH1;1B9X2;0AZZW;196RM;0V0ZJ	erbb2 interacting protein [Source:RGD Symbol;Acc:1562952]	365661	M0R9T2
ENSRNOG00000000906	159.757	89.7878	229.726	2.55855	1.35533	0.00995877	0.249372	12	6711747	6740714	-	2221	Medag	GO:0005737;GO:0005737;GO:0045600;GO:0045600;	-	-	S	13KSS;0USCY;190YN;1ATHC;0DIZ4;0VC8X;1CXYQ;0IKGJ;0A1DB	mesenteric estrogen-dependent adipogenesis [Source:RGD Symbol;Acc:1307396]	-	-
ENSRNOG00000023428	68.8662	38.8892	98.8433	2.54166	1.34577	0.0234932	0.361839	10	55013703	55080421	+	4719	Pik3r5	GO:0005829;GO:0005944;GO:0034451;GO:0046935;	K21290	-	T	1CXP9;0UI6K;13JT6;18XEU;0VC07;0A13Y;0DKXE;1AZQY;0IES2	phosphoinositide-3-kinase, regulatory subunit 5 [Source:RGD Symbol;Acc:1563261]	497931	D4A4I3
ENSRNOG00000009331	101.938	57.6046	146.271	2.53922	1.34438	0.00715354	0.20541	3	148579920	148623033	+	2061	Hck	GO:0000166;GO:0001784;GO:0002376;GO:0004672;GO:0004672;GO:0004713;GO:0004713;GO:0004713;GO:0004713;GO:0004713;GO:0004714;GO:0004715;GO:0004715;GO:0005102;GO:0005515;GO:0005524;GO:0005524;GO:0005524;GO:0005634;GO:0005737;GO:0005764;GO:0005764;GO:0005794;GO:0005829;GO:0005856;GO:0005884;GO:0005884;GO:0005886;GO:0005886;GO:0005901;GO:0005901;GO:0005925;GO:0005925;GO:0006468;GO:0006468;GO:0006887;GO:…	K08893	EC:2.7.10.2	Z;T	18UEZ;0V4Q4;1AZTR;KOG0197;09TQU;0USB1;1CPQW;0DF11;12NBR	HCK proto-oncogene, Src family tyrosine kinase [Source:RGD Symbol;Acc:2785]	25734	P50545
ENSRNOG00000019357	243.175	137.883	348.466	2.52727	1.33758	0.0415803	0.468044	10	59743544	59748062	+	1643	Tax1bp3	GO:0005515;GO:0005634;GO:0005737;GO:0005886;GO:0016020;GO:0016055;GO:0043231;GO:0001650;GO:0005515;GO:0007266;GO:0008022;GO:0015629;GO:0043231;GO:0090630;GO:2000009;	K24067	-	M	KOG3553	Tax1 binding protein 3 [Source:RGD Symbol;Acc:1308924]	360564	Q4QQV1
ENSRNOG00000001187	29.1185	16.5115	41.7254	2.52705	1.33746	0.0338602	0.424243	12	47444104	47456894	-	2748	Oasl	GO:0001730;GO:0003677;GO:0003725;GO:0003725;GO:0003725;GO:0005515;GO:0005654;GO:0005730;GO:0005737;GO:0005829;GO:0009615;GO:0016779;GO:0045071;GO:0051607;GO:0051607;GO:0070106;GO:0070106;GO:1900246;	K14608	-	J;O	0DF4M;0V4TK;1CP6T;1947B;KOG0001;1B0SC;09TUC;12QYV;0UGA6	2'-5'-oligoadenylate synthetase-like [Source:RGD Symbol;Acc:1308586]	304545	G3V645
ENSRNOG00000046834	404.962	229.967	579.956	2.52191	1.33451	0.0102215	0.250112	9	9721105	9747167	+	5188	C3	GO:0001798;GO:0001934;GO:0001970;GO:0002376;GO:0004866;GO:0004866;GO:0005515;GO:0005576;GO:0005576;GO:0005576;GO:0005576;GO:0005615;GO:0005615;GO:0005615;GO:0005615;GO:0006954;GO:0006954;GO:0006954;GO:0006956;GO:0006956;GO:0006956;GO:0006956;GO:0006957;GO:0006958;GO:0009617;GO:0009986;GO:0010575;GO:0010828;GO:0010866;GO:0010884;GO:0010951;GO:0016322;GO:0031715;GO:0032991;GO:0035846;GO:0045087;GO:…	K03990	-	O;V	1CWM0;1AZ7Z;0V9VN;0URWM;18WYI;13MNB;KOG1366;09YXX;0DKCZ	complement C3 [Source:RGD Symbol;Acc:2232]	24232	P01026;M0RBF1
ENSRNOG00000020845	159.508	90.786	228.229	2.51392	1.32994	0.00556131	0.181766	1	88875375	88879303	+	603	Tyrobp	GO:0002222;GO:0002223;GO:0002274;GO:0005102;GO:0005886;GO:0005887;GO:0009986;GO:0030316;GO:0030889;GO:0034241;GO:0042802;GO:0042803;GO:0050821;GO:2000010;	K07992	-	T	0J1XS;0VJG3;13YCU;1B6GG;1D4DW;0DUU9;0A8IP;0UW2M;193Q5	Tyro protein tyrosine kinase binding protein [Source:RGD Symbol;Acc:1303081]	361537	Q6X9T7
ENSRNOG00000021548	324.821	184.934	464.709	2.51283	1.32932	0.0266248	0.383657	8	116307141	116318289	+	1956	Rassf1	GO:0005515;GO:0005575;GO:0005634;GO:0005634;GO:0005856;GO:0005874;GO:0007050;GO:0007050;GO:0007165;GO:0007165;GO:0007165;GO:0007265;GO:0007265;GO:0007265;GO:0008150;GO:0015630;GO:0015630;GO:0015630;GO:0035556;GO:0035556;GO:0070507;GO:0070507;GO:0005515;GO:0005575;GO:0005634;GO:0007050;GO:0007165;GO:0007165;GO:0007165;GO:0007265;GO:0007265;GO:0008150;GO:0015630;GO:0015630;GO:0070507;GO:0070507;	K09850	-	W;T	1DEZ2;0IPAE;0WGD0;13CA9;1974D;0B3Y0;1BAVG;0V2YS;0E7ZK	Ras association domain family member 1 [Source:RGD Symbol;Acc:1359383]	363140	Q68FW0
ENSRNOG00000050404	553.143	315.083	791.204	2.5111	1.32832	0.0105174	0.25518	3	171294856	171342646	-	1657	Pmepa1	GO:0000139;GO:0010008;GO:0010991;GO:0010991;GO:0030512;GO:0030512;GO:0031901;GO:0043231;GO:0050699;GO:0060394;GO:0070412;GO:0070412;	-	-	T	1AV1S;09X40;0IDYQ;0DRFJ;18ZYP;13HZM;0UKYC;1D0MT;0VEQB	prostate transmembrane protein, androgen induced 1 [Source:RGD Symbol;Acc:1308255]	311676	-
ENSRNOG00000048660	30.1513	17.196	43.1066	2.50678	1.32584	0.0323488	0.414434	10	59695913	59698168	-	2256	Haspin	GO:0000166;GO:0000278;GO:0003677;GO:0004672;GO:0004672;GO:0004672;GO:0004672;GO:0004674;GO:0004674;GO:0005524;GO:0005524;GO:0005524;GO:0005524;GO:0005524;GO:0005634;GO:0005634;GO:0005634;GO:0005654;GO:0005737;GO:0005813;GO:0005813;GO:0005819;GO:0005819;GO:0006468;GO:0006468;GO:0006468;GO:0006468;GO:0007064;GO:0007064;GO:0016301;GO:0016310;GO:0016740;GO:0035556;GO:0035556;GO:0035556;GO:0071459;GO:…	K16315	EC:2.7.11.1	D	0DKYN;1AU0P;194J7;0VAD5;09ZG3;KOG2464;0UT8A;13MTR;1CVTK	histone H3 associated protein kinase [Source:RGD Symbol;Acc:1596276]	687827	M0RBT0
ENSRNOG00000005480	1290.16	737.99	1842.33	2.49642	1.31986	0.0371086	0.44393	4	165606819	165630118	-	1834	Ybx3	GO:0000122;GO:0000977;GO:0001701;GO:0003676;GO:0003677;GO:0003730;GO:0005634;GO:0005737;GO:0005829;GO:0007283;GO:0008584;GO:0009566;GO:0043021;GO:0043066;GO:0046622;GO:0048642;GO:0060546;GO:0071356;GO:0071474;GO:1902219;GO:1905538;GO:0003676;GO:0003676;	K06099	-	J;K	1AT05;0A4KQ;0UNUU;0V4QF;0DS3I;18TXJ;12U7H;KOG3070;1D0XA	Y box binding protein 3 [Source:RGD Symbol;Acc:621056]	83807	Q62764
ENSRNOG00000038881	122.431	70.0376	174.824	2.49614	1.3197	0.0167789	0.313161	11	66736966	66759402	-	1950	Hcls1	GO:0000122;GO:0000122;GO:0001085;GO:0001085;GO:0003779;GO:0003779;GO:0005515;GO:0005634;GO:0005634;GO:0005634;GO:0005634;GO:0005667;GO:0005667;GO:0005737;GO:0005737;GO:0005737;GO:0005737;GO:0005829;GO:0005884;GO:0005886;GO:0005886;GO:0008284;GO:0008284;GO:0008284;GO:0009725;GO:0009725;GO:0009725;GO:0014068;GO:0014068;GO:0017124;GO:0017124;GO:0019901;GO:0019901;GO:0030041;GO:0030041;GO:0030218;GO:…	K06106	-	Z;B	0IFV2;12STU;0DIR8;09VCP;0V8BW;1CTGA;190QM;0UP8V;1B3BZ	hematopoietic cell specific Lyn substrate 1 [Source:RGD Symbol;Acc:1304754]	288077	Q68FX4
ENSRNOG00000026605	26.033	14.9102	37.1558	2.49197	1.31728	0.0410619	0.465752	6	127336305	127337791	-	451	Ifi27l2b	GO:0005739;GO:0006915;GO:0007568;GO:0009615;GO:0016020;GO:0016021;GO:0016021;GO:0016021;GO:0031966;GO:0097190;	-	-	S	1B6JP;0DVH0;0UW84;0VK70;0JGH8;148V6;0A9D6;1D4TK	interferon, alpha-inducible protein 27 like 2B [Source:RGD Symbol;Acc:1559721]	299269	Q6IEA8
ENSRNOG00000031058	26.4742	15.1949	37.7536	2.48463	1.31303	0.0361859	0.436618	X	15155230	15164105	+	1739	Was	GO:0002625;GO:0003779;GO:0005634;GO:0005829;GO:0005884;GO:0005886;GO:0005911;GO:0006955;GO:0007015;GO:0008064;GO:0008154;GO:0010591;GO:0012506;GO:0016197;GO:0017124;GO:0019901;GO:0030041;GO:0030041;GO:0030048;GO:0031267;GO:0035861;GO:0042110;GO:0042802;GO:0042802;GO:0043274;GO:0045335;GO:0045944;GO:0051492;GO:0051497;GO:0071346;GO:1905168;GO:2000146;GO:2000601;GO:0002625;GO:0003674;GO:0003779;GO:…	K05747	-	Z	1B9YQ;0WCK9;14T92;KOG3671;0V355;0E8A7;1DF8X;196S7;0B03Q	WASP actin nucleation promoting factor [Source:RGD Symbol;Acc:1563567]	317371	G3V9K5
ENSRNOG00000000521	623.294	358.339	888.25	2.4788	1.30964	0.041715	0.468151	20	6351458	6358864	+	1950	Cdkn1a	GO:0000079;GO:0000082;GO:0000086;GO:0000307;GO:0004860;GO:0004860;GO:0004861;GO:0004861;GO:0004861;GO:0005515;GO:0005634;GO:0005634;GO:0005634;GO:0005730;GO:0005737;GO:0005829;GO:0006606;GO:0006974;GO:0006977;GO:0006978;GO:0007050;GO:0007050;GO:0007050;GO:0007095;GO:0007265;GO:0007346;GO:0007346;GO:0007346;GO:0007507;GO:0008285;GO:0009411;GO:0009636;GO:0010033;GO:0010165;GO:0010243;GO:0010629;GO:…	K06625	-	T	1933H;13Q29;1D30F;0UV0F;1B5ST;0DTNN;0A6NZ;0VHH2;KOG4743	cyclin-dependent kinase inhibitor 1A [Source:RGD Symbol;Acc:69328]	114851	Q64315
ENSRNOG00000022533	57.8572	33.2873	82.4272	2.47624	1.30815	0.00778925	0.215179	12	16988136	17016791	+	3225	Micall2	GO:0005515;GO:0032456;GO:0005515;GO:0031005;GO:0032456;	K21068	-	Z	13I9X;1B00Q;0VAAH;09ZDG;1CVR0;0UQA6;0IKSW;0DKVW;190QA	MICAL-like 2 [Source:RGD Symbol;Acc:1307875]	288515	A0A0G2K365
ENSRNOG00000015157	34.5795	19.9487	49.2104	2.46685	1.30267	0.0307584	0.403123	10	58951842	58973020	-	2441	Smtnl2	GO:0005515;	-	-	Z	1B4UD;133VC;1CY8Y;KOG4678;0VCIN;0A3C8;1910S;0DPB1;0USP7	smoothelin-like 2 [Source:RGD Symbol;Acc:1585960]	679629	D3ZUC1
ENSRNOG00000013328	51.594	29.7704	73.4176	2.46613	1.30225	0.0289018	0.393242	16	61954590	62096497	+	1186	Rbpms	GO:0003676;GO:0003713;GO:0003723;GO:0005654;GO:0005829;GO:0006979;GO:0008143;GO:0010494;GO:0010862;GO:0042803;GO:0060391;GO:0003676;	K25091	-	A;K	0DNY7;1CXVP;0USA9;13HCP;KOG1457;1950Z;0A1AK;1AXYP;0VC6A	RNA binding protein, mRNA processing factor [Source:RGD Symbol;Acc:1561067]	498642	F1M9Y9
ENSRNOG00000001752	90.3108	52.1835	128.438	2.46128	1.29941	0.0286899	0.392088	11	71872830	71889887	+	2472	Nrros	GO:0005515;GO:0005783;GO:0006954;GO:0006955;GO:0007179;GO:0009986;GO:0009986;GO:0014005;GO:0035583;GO:0036364;GO:0050431;GO:0050431;	-	-	T	1ARTI;KOG0619;09WF1;18VN1;0DHQE;12PGA;0UHZX;0V7DK;1CSER	negative regulator of reactive oxygen species [Source:RGD Symbol;Acc:1310771]	303875	Q5BK65
ENSRNOG00000042717	190.672	110.305	271.038	2.45716	1.29699	0.000580827	0.0580987	2	197987705	197991574	-	1737	Ciart	GO:0000976;GO:0000976;GO:0000978;GO:0000978;GO:0005634;GO:0005634;GO:0032922;GO:0032922;GO:0032922;GO:0032922;GO:0045475;GO:0045892;GO:0045892;GO:0070888;GO:0000976;GO:0000976;GO:0000978;GO:0000978;GO:0000978;GO:0005634;GO:0005634;GO:0005634;GO:0032922;GO:0032922;GO:0032922;GO:0032922;GO:0032922;GO:0045475;GO:0045475;GO:0045892;GO:0045892;GO:0045892;GO:0070888;GO:0070888;	K21599	-	S	13N8G;1CS5D;0UJKF;0DHF8;09W5W;18V0E;0IICF;0V749;1B3U8	circadian associated repressor of transcription [Source:RGD Symbol;Acc:1566380]	365871	D3ZPV3
ENSRNOG00000042771	61.5815	35.64	87.523	2.45575	1.29617	0.0103473	0.25285	7	118685022	118694015	+	1558	Apol3	GO:0005576;GO:0005576;GO:0006869;GO:0006869;GO:0008289;GO:0008289;GO:0008289;GO:0042157;GO:0042157;GO:0005576;GO:0005576;GO:0006869;GO:0006869;GO:0008289;GO:0008289;GO:0008289;GO:0042157;GO:0042157;	K14480	-	S;T	0UKBI;0VAS1;0IWES;1CSM0;1B64V;13Q1H;0DMDZ;09ZVH	apolipoprotein L, 3 [Source:RGD Symbol;Acc:1306480]	315108	Q5U1W1
ENSRNOG00000004373	330.833	191.681	469.986	2.45192	1.29391	0.000446963	0.0508561	19	24846938	24854953	+	2029	Ddx39a	GO:0003676;GO:0004386;GO:0005524;GO:0000398;GO:0003676;GO:0004386;GO:0005524;GO:0005634;GO:0005737;GO:0006406;GO:0016607;GO:0042802;	K13182	EC:3.6.4.13	A	0UKS5;KOG0329;0V6I3;1CW5E;1B1Q1;09VIW;0DHKJ;190U5;12PBW	DExD-box helicase 39A [Source:RGD Symbol;Acc:619920]	89827	Q5U216
ENSRNOG00000005433	50.3769	29.2124	71.5413	2.449	1.2922	0.011509	0.263181	4	133037014	133131953	-	2953	Shq1	GO:0000493;GO:0000493;GO:0000493;GO:0005654;GO:0005737;GO:0005737;GO:0022618;GO:0043065;GO:0051082;GO:2000233;GO:0000493;GO:0000493;GO:0000493;GO:0005654;GO:0005654;GO:0005737;GO:0005737;GO:0005737;GO:0005829;GO:0022618;GO:0022618;GO:0043065;GO:0043065;GO:0051082;GO:2000233;GO:2000233;	K14764	-	S;O	KOG3247;0V69Z;1ASPG;1CR8X;0UH09;18TK5;12TVB;09VAN;0DGJ2	SHQ1, H/ACA ribonucleoprotein assembly factor [Source:RGD Symbol;Acc:1310610]	297483	B4F784
ENSRNOG00000001728	227.572	131.991	323.153	2.44831	1.29178	0.00409951	0.156924	11	73676601	73678984	-	2384	Fam43a	-	-	-	S;O	0A4QA;13J8Y;0VFJD;18VMA;1B0JS;1CUZ5;0DK5C;KOG4448;0US94	family with sequence similarity 43, member A [Source:RGD Symbol;Acc:1304790]	288031	Q4KLG0
ENSRNOG00000012965	49.0493	28.4703	69.6284	2.44565	1.29022	0.0193828	0.330904	5	150970909	150987081	-	4033	Themis2	GO:0005634;GO:0005737;GO:0050852;GO:0050864;	-	-	T	0UK75;1CSM7;13N0X;0V7A3;19562;0IF5X;1B4FP;09WD4;0DHWK	thymocyte selection associated family member 2 [Source:RGD Symbol;Acc:1561016]	500561	D3ZDR7
ENSRNOG00000037247	208.177	120.877	295.476	2.44444	1.28951	0.0416681	0.468044	1	101012822	101016720	+	950	Rras	GO:0002521;GO:0003924;GO:0003924;GO:0005525;GO:0007165;GO:0010595;GO:0016020;GO:0019003;GO:0030336;GO:0044877;GO:0045766;GO:0051896;GO:0060325;GO:0070372;GO:1904906;GO:2001214;	K07829	-	J	KOG0395	RAS related [Source:RGD Symbol;Acc:1311443]	361568	D3Z8L7
ENSRNOG00000019264	379.749	220.524	538.973	2.44405	1.28928	0.00909897	0.237873	4	157822840	157829241	-	2075	Ltbr	GO:0005515;GO:0005794;GO:0006955;GO:0006955;GO:0016020;GO:0016021;GO:0031625;GO:0031625;GO:0031625;GO:0042802;GO:0042802;GO:0043011;GO:0043011;GO:0043123;GO:0043123;GO:0043123;GO:0043123;GO:0043123;GO:0046330;GO:0046330;GO:0048534;GO:0048534;GO:0071260;GO:0071260;GO:2001238;GO:2001238;	K03159	-	T	09XE6;0DIRS;0UMC3;0IKNN;1CTGX;12SC4;0V8C8;191FK;1AV3M	lymphotoxin beta receptor [Source:RGD Symbol;Acc:1309448]	297604	Q5U2S8
ENSRNOG00000023972	1445.13	839.439	2050.82	2.44308	1.2887	0.0182335	0.323127	16	83387364	83438561	-	4938	Col4a2	GO:0005201;GO:0005581;GO:0005587;GO:0005604;GO:0006351;GO:0016525;GO:0035987;GO:0038063;GO:0071560;	K06237	-	W	1CVYB;0UPWV;1AZK5;09U8F;0V57J;190CF;KOG3544;0DFDX;12N1R	collagen type IV alpha 2 chain [Source:RGD Symbol;Acc:1308085]	306628	-
ENSRNOG00000006118	501.337	291.357	711.317	2.4414	1.28771	0.00586109	0.186867	7	77156006	77162148	-	2993	Klf10	GO:0000978;GO:0001046;GO:0001228;GO:0005634;GO:0006355;GO:0007623;GO:0009267;GO:0030282;GO:0035019;GO:0045672;GO:0045892;GO:0045944;GO:1990837;	K09209	-	K	18X56;13JUR;09Y6F;0UQA9;0VEJG;KOG1721;1B2AF;1D08Q;0DR3S	Kruppel-like factor 10 [Source:RGD Symbol;Acc:621652]	81813	O08876
ENSRNOG00000015622	78.1271	45.5716	110.683	2.42877	1.28022	0.00446915	0.163312	2	53797954	53811134	-	1993	Fbxo4	GO:0000151;GO:0000151;GO:0000209;GO:0000209;GO:0004842;GO:0004842;GO:0005515;GO:0005737;GO:0005737;GO:0007568;GO:0007568;GO:0010608;GO:0010608;GO:0016567;GO:0016567;GO:0019005;GO:0019005;GO:0019005;GO:0019725;GO:0019725;GO:0031146;GO:0031146;GO:0031146;GO:0031146;GO:0031398;GO:0031647;GO:0031647;GO:0031648;GO:0031648;GO:0032212;GO:0032212;GO:0035726;GO:0035726;GO:0042803;GO:0042803;GO:0048147;GO:…	K10291	-	O	09XZ8;0V8X0;0UG7A;0IE1X;1ARZ8;18UFK;1CU4G;12TR7;0DJC8	F-box protein 4 [Source:RGD Symbol;Acc:1307580]	310363	D3ZIH4
ENSRNOG00000001425	70.4435	41.1099	99.777	2.42708	1.27922	0.00551437	0.181265	12	23473270	23501036	+	2806	Sh2b2	GO:0001725;GO:0001726;GO:0001922;GO:0005068;GO:0005737;GO:0005884;GO:0005886;GO:0007165;GO:0008286;GO:0019221;GO:0019222;GO:0030036;GO:0035556;GO:0035591;GO:0035591;GO:0035591;GO:0042169;GO:0050776;GO:0050851;GO:0050853;GO:0050873;	K07193	-	Z;T	0V431;0IMWK;0DEFI;0UFD7;09T4B;1ARAG;18S0J;12N1E;1CP57	SH2B adaptor protein 2 [Source:RGD Symbol;Acc:69284]	114203	Q9Z200
ENSRNOG00000000902	10044.4	5872.78	14216.1	2.42068	1.27541	0.000844601	0.0688385	12	6322668	6341902	-	3446	Hsph1	GO:0000774;GO:0005654;GO:0005737;GO:0005829;GO:0005874;GO:0032991;GO:0043014;GO:0051085;	K09485	-	O	1CYEZ;12NET;0DHTZ;1B4CT;09WIN;0V7H7;18XA2;KOG0103;0UK3I	heat shock protein family H (Hsp110) member 1 [Source:RGD Symbol;Acc:1311609]	288444	Q66HA8
ENSRNOG00000009972	286.869	168.044	405.693	2.4142	1.27155	0.000315362	0.0410083	10	86860685	86884210	+	3456	Rara	GO:0000122;GO:0000122;GO:0000122;GO:0000785;GO:0000785;GO:0000900;GO:0000976;GO:0000976;GO:0000977;GO:0000977;GO:0000977;GO:0000978;GO:0000978;GO:0000978;GO:0001657;GO:0001657;GO:0001843;GO:0001843;GO:0001889;GO:0001972;GO:0001972;GO:0002068;GO:0002068;GO:0003148;GO:0003148;GO:0003417;GO:0003417;GO:0003677;GO:0003677;GO:0003677;GO:0003677;GO:0003677;GO:0003682;GO:0003682;GO:0003700;GO:0003700;GO:…	K08527	-	K	0A2S1;0VCMW;1CUZC;13J5G;1AT6T;0DK5J;KOG3575;0UIJW	retinoic acid receptor, alpha [Source:RGD Symbol;Acc:3534]	24705	Q499N1
ENSRNOG00000016885	432.402	253.643	611.161	2.40953	1.26875	0.00707209	0.20491	17	67887939	67945037	-	2851	Klf6	-	K09207	-	K	KOG1721	Kruppel-like factor 6 [Source:RGD Symbol;Acc:62389]	58954	-
ENSRNOG00000012865	224.423	131.647	317.2	2.40948	1.26872	0.017026	0.314679	8	115173453	115179191	-	2092	Parp3	GO:0000723;GO:0000723;GO:0003950;GO:0003950;GO:0003950;GO:0003950;GO:0003950;GO:0003950;GO:0005634;GO:0005654;GO:0005730;GO:0006281;GO:0006302;GO:0006302;GO:0006302;GO:0006302;GO:0006302;GO:0006302;GO:0006471;GO:0006471;GO:0006471;GO:0006471;GO:0006974;GO:0016604;GO:0016740;GO:0016757;GO:0030592;GO:0030592;GO:0035861;GO:0035861;GO:0035861;GO:0035861;GO:0045171;GO:0045829;GO:0045829;GO:0051106;GO:…	K10798	EC:2.4.2.30	O;K;L	09WU5;1925M;0V7S4;13JVN;1B22F;0UJYN;1CSUC;KOG1037;0DI3Z	poly (ADP-ribose) polymerase family, member 3 [Source:RGD Symbol;Acc:1305189]	300985	Q5U2U3
ENSRNOG00000000394	421.308	247.323	595.294	2.40695	1.2672	0.0378101	0.449213	20	32120320	32139789	-	1572	Srgn	-	K06849	-	O;W	0VJF3;1D3YT;0J42T;0UVQV;196GD;0DUMG;1B66S;0A8TU;13X45	serglycin [Source:RGD Symbol;Acc:619969]	56782	P04917
ENSRNOG00000008165	76.9287	45.1644	108.693	2.40661	1.267	0.00470383	0.168569	3	148327965	148370187	+	3287	Tpx2	GO:0000922;GO:0000922;GO:0000922;GO:0005634;GO:0005654;GO:0005737;GO:0005819;GO:0005819;GO:0005819;GO:0005819;GO:0005856;GO:0005874;GO:0005874;GO:0005880;GO:0007020;GO:0007020;GO:0007026;GO:0007026;GO:0007049;GO:0008017;GO:0015630;GO:0019901;GO:0019901;GO:0019901;GO:0030295;GO:0032147;GO:0032147;GO:0032147;GO:0032147;GO:0043203;GO:0043203;GO:0045171;GO:0051301;GO:0060236;GO:0060236;GO:0060236;GO:…	K16812	-	Z	09WN2;0IIEY;190I3;0DHXK;13HQ9;1AZT1;0UQI8;1CSNB;0V7KN	TPX2, microtubule nucleation factor [Source:RGD Symbol;Acc:1311894]	311546	D3ZA78
ENSRNOG00000053272	1215.87	713.972	1717.77	2.40593	1.2666	0.000863594	0.0690316	13	51022681	51030802	+	1829	Chi3l1	GO:0003674;GO:0005576;GO:0005576;GO:0005615;GO:0005615;GO:0005615;GO:0005615;GO:0005615;GO:0005737;GO:0005737;GO:0005783;GO:0005783;GO:0005975;GO:0005975;GO:0006032;GO:0006915;GO:0006954;GO:0006954;GO:0006954;GO:0007250;GO:0007250;GO:0008061;GO:0008061;GO:0008061;GO:0008061;GO:0008061;GO:0008061;GO:0009612;GO:0009612;GO:0009612;GO:0010800;GO:0010800;GO:0030246;GO:0030324;GO:0030324;GO:0030324;GO:…	K17523	-	-	-	chitinase 3 like 1 [Source:RGD Symbol;Acc:620874]	89824	Q9WTV1
ENSRNOG00000002680	1530.1	898.953	2161.24	2.40418	1.26554	0.0185219	0.325161	13	70658707	70783515	-	5998	Lamc1	GO:0005201;GO:0005201;GO:0005201;GO:0005604;GO:0005604;GO:0005604;GO:0005604;GO:0005606;GO:0007155;GO:0007155;GO:0009887;GO:0009888;GO:0016020;GO:0016477;GO:0016477;GO:0016477;GO:0022617;GO:0022617;GO:0031012;GO:0031175;GO:0031581;GO:0031581;GO:0031594;GO:0034446;GO:0034446;GO:0034446;GO:0043083;GO:0043208;GO:0043259;GO:0062023;GO:0065003;GO:0065003;GO:0005201;GO:0005201;GO:0005604;GO:0005604;GO:…	K05635	-	W	12R2U;09V1Y;0DGBB;0V61M;1ATMC;18UKK;1CR0T;0UI1N;KOG1836	laminin subunit gamma 1 [Source:RGD Symbol;Acc:621052]	117036	F1MAA7
ENSRNOG00000000704	41.9413	24.6709	59.2117	2.40007	1.26307	0.0192222	0.329609	12	48789261	48793553	+	2530	Cmklr1	GO:0004930;GO:0004930;GO:0004930;GO:0005886;GO:0005886;GO:0006935;GO:0007165;GO:0007186;GO:0007186;GO:0007186;GO:0007186;GO:0010759;GO:0016020;GO:0016021;GO:0016021;GO:0016021;GO:0032088;GO:0032695;GO:0045600;GO:0050848;GO:0120162;GO:0120162;	K04245	-	T	09YRX;1CTRF;0DNT1;0II0H;1AY9T;0UUGE;13FV7;18VUS;0V7XT	chemerin chemokine-like receptor 1 [Source:RGD Symbol;Acc:69359]	60669	G3V625
ENSRNOG00000011153	526.904	309.948	743.861	2.39995	1.26301	0.000144983	0.0283808	4	152995865	153018394	+	3845	Il17ra	GO:0005102;GO:0005886;GO:0030368;GO:0032736;GO:0032747;GO:0032754;GO:0032755;GO:0050729;GO:0050832;GO:0071621;GO:0072537;GO:0097400;GO:0097400;GO:1900017;GO:2000340;	K05164	-	T	13JH5;1CQP4;0V5PE;1B1CI;09UPU;0DFZM;0UHIY;18SS1;0IH6C	interleukin 17 receptor A [Source:RGD Symbol;Acc:1306559]	312679	D4A740
ENSRNOG00000055564	468.082	275.525	660.64	2.39775	1.26168	0.00961524	0.246382	3	82854777	82856171	-	1395	RGD1564664	-	-	-	-	-	similar to LOC387763 protein [Source:RGD Symbol;Acc:1564664]	499839	A8IHN8
ENSRNOG00000014832	267.389	157.59	377.187	2.39347	1.25911	0.000404511	0.0467086	8	116012121	116045954	-	2641	Mapkapk3	GO:0002224;GO:0004672;GO:0004674;GO:0005524;GO:0005654;GO:0006468;GO:0018105;GO:0032496;GO:0034097;GO:0044351;	K04444	EC:2.7.11.1	T	18UXI;12PZ5;0UTB0;KOG0604;1B3PJ;0DJR3;09YBC;0V7I5;1CVTI	MAPK activated protein kinase 3 [Source:RGD Symbol;Acc:1304980]	315994	Q66H84
ENSRNOG00000004489	203.433	120.012	286.855	2.39022	1.25715	0.0430303	0.475527	19	24855299	24875137	-	3109	Adgre5	GO:0003674;GO:0004888;GO:0004888;GO:0004930;GO:0004930;GO:0004930;GO:0004930;GO:0005509;GO:0005509;GO:0005575;GO:0005886;GO:0005887;GO:0007165;GO:0007166;GO:0007166;GO:0007186;GO:0007186;GO:0007186;GO:0007189;GO:0008150;GO:0009897;GO:0016020;GO:0016021;GO:0016021;GO:0016021;GO:0051965;	K08446	-	T	1AYXF;1CPF6;09TEB;13HFH;18U3U;0V4DH;KOG4193;0DERD;0UG92	adhesion G protein-coupled receptor E5 [Source:RGD Symbol;Acc:1305595]	361383	Q5XI36
ENSRNOG00000050968	40.4913	23.8952	57.0874	2.38907	1.25645	0.0193944	0.330904	15	19338175	19350210	+	1959	Ptger2	GO:0004930;GO:0004957;GO:0007186;GO:0007189;GO:0016021;GO:0032496;GO:0032570;GO:0042127;GO:0071380;	K04259	-	T	KOG3656;0V8D4;1AWY6;09XEX;0UMDB;18SGR;1CTHR;13JSY;0DISK	prostaglandin E receptor 2 [Source:RGD Symbol;Acc:620020]	81752	Q62928
ENSRNOG00000005424	1984.01	1171.47	2796.56	2.38723	1.25534	0.000516568	0.0556457	6	42852683	42859927	+	3641	Odc1	GO:0003824;GO:0003824;GO:0006596;GO:0006596;GO:0001822;GO:0001822;GO:0003824;GO:0003824;GO:0004586;GO:0004586;GO:0004586;GO:0004586;GO:0004586;GO:0004586;GO:0005737;GO:0005737;GO:0005737;GO:0005829;GO:0005829;GO:0006595;GO:0006596;GO:0006596;GO:0006596;GO:0008284;GO:0008284;GO:0009446;GO:0009615;GO:0009615;GO:0016829;GO:0016831;GO:0033387;GO:0033387;GO:0033387;GO:0033387;GO:0042176;GO:0042176;GO:…	K01581	EC:4.1.1.17	E	0V441;12P9T;1ATE0;KOG0622;09T5B;0DGPX;1CRDR;0UH37;18TFZ	ornithine decarboxylase 1 [Source:RGD Symbol;Acc:3227]	24609	P09057
ENSRNOG00000039744	99.6494	58.9103	140.389	2.38309	1.25283	0.00286007	0.131817	20	4673658	4935887	-	4582	RT1-CE4	GO:0002476;GO:0005615;GO:0006955;GO:0006955;GO:0009897;GO:0016020;GO:0016021;GO:0019882;GO:0019882;GO:0002476;GO:0005615;GO:0006955;GO:0006955;GO:0009897;GO:0016020;GO:0016021;GO:0019882;GO:0019882;GO:0002476;GO:0005615;GO:0006955;GO:0006955;GO:0009897;GO:0016020;GO:0016021;GO:0019882;GO:0019882;GO:0002476;GO:0005615;GO:0009897;GO:0016020;GO:0016021;	K06751	-	U	0DYTT;0ADYT;1D7I8;13R8M;0II5V;0VR67;0UXG0	RT1 class I, locus CE4 [Source:RGD Symbol;Acc:1598234]	414783	Q861Q1
ENSRNOG00000013014	148.695	88.1005	209.29	2.37558	1.24828	0.0145636	0.291986	19	55249616	55257876	-	768	Cyba	GO:0001666;GO:0001725;GO:0001938;GO:0003106;GO:0005515;GO:0005634;GO:0005737;GO:0005737;GO:0005768;GO:0005768;GO:0005794;GO:0005886;GO:0005925;GO:0006801;GO:0006801;GO:0006801;GO:0006954;GO:0006954;GO:0009055;GO:0009055;GO:0014823;GO:0014895;GO:0016020;GO:0016175;GO:0016175;GO:0016175;GO:0016324;GO:0016491;GO:0017004;GO:0017004;GO:0017124;GO:0017124;GO:0020037;GO:0020037;GO:0022900;GO:0030307;GO:…	K08009	-	C	1D11B;0DS3S;0VFGB;1B40G;0UUMF;0IXYN;0A4M0;18S1H;13RYH	cytochrome b-245 alpha chain [Source:RGD Symbol;Acc:620573]	79129	Q62737
ENSRNOG00000008144	247.264	146.825	347.703	2.36814	1.24376	0.0203661	0.338704	10	39109522	39116531	+	2047	Irf1	GO:0000785;GO:0000976;GO:0000976;GO:0000976;GO:0000978;GO:0000981;GO:0001228;GO:0003677;GO:0003677;GO:0003700;GO:0003700;GO:0003700;GO:0005634;GO:0005634;GO:0005737;GO:0005737;GO:0006355;GO:0006355;GO:0006915;GO:0006915;GO:0006915;GO:0007050;GO:0008285;GO:0008285;GO:0010468;GO:0032481;GO:0032728;GO:0032735;GO:0034124;GO:0035458;GO:0043374;GO:0043565;GO:0045590;GO:0045892;GO:0045892;GO:0045893;GO:…	K09444	-	K	1925D;1AX39;13CX1;0IER3;0DIYB;1CTPS;0UM2B;0VF97;0A4EA	interferon regulatory factor 1 [Source:RGD Symbol;Acc:2920]	24508	P23570;Q6DGG4
ENSRNOG00000011913	1192.46	708.81	1676.11	2.36468	1.24164	0.00846756	0.227028	2	104744461	104799853	+	3792	Cp	GO:0005507;GO:0005507;GO:0006811;GO:0016491;GO:0016491;GO:0016491;GO:0046872;GO:0055114;GO:0005507;GO:0005507;GO:0005615;GO:0006811;GO:0016491;GO:0016491;GO:0016491;GO:0046872;GO:0051087;GO:0055114;	K13624	EC:1.16.3.1	Q	09WF8;192EK;0UPN2;KOG1263;12Q6R;1AZC8;1CSYR;0DI8B;0V7VZ	ceruloplasmin [Source:RGD Symbol;Acc:2387]	24268	A0A0G2K9I6
ENSRNOG00000019496	117.032	69.5671	164.496	2.36457	1.24158	0.0118875	0.265537	10	88764732	88789057	+	3612	Stat5a	GO:0001938;GO:0003677;GO:0003677;GO:0003677;GO:0003700;GO:0003700;GO:0005634;GO:0005634;GO:0005654;GO:0005737;GO:0005829;GO:0006355;GO:0006355;GO:0007165;GO:0007165;GO:0038026;GO:0043536;GO:0060397;GO:0060397;	K11223	-	K	1B289;12PE2;KOG3667;194UJ;0UP21;09VPA;0V6N6;0DGXQ;1CRMY	signal transducer and activator of transcription 5A [Source:RGD Symbol;Acc:3773]	24918	Q62771
ENSRNOG00000006778	92.8158	55.2261	130.405	2.3613	1.23958	0.0485176	0.499141	7	3216497	3224201	+	2005	Mmp19	GO:0001541;GO:0001542;GO:0001554;GO:0003674;GO:0004222;GO:0004222;GO:0004222;GO:0004222;GO:0005575;GO:0005615;GO:0006508;GO:0006508;GO:0006508;GO:0008233;GO:0008237;GO:0008237;GO:0008237;GO:0008270;GO:0008270;GO:0009725;GO:0016787;GO:0030198;GO:0030574;GO:0031012;GO:0031012;GO:0046872;GO:0051591;	K07998	EC:3.4.24.-	O;W	KOG1565;0DIW0;1CTME;09TSQ;0V4S1;1ARB7;12PPA;18ZAV;0UMI7	matrix metallopeptidase 19 [Source:RGD Symbol;Acc:1311376]	304608	C0M4B0
ENSRNOG00000025679	879.273	523.327	1235.22	2.36032	1.23898	0.00014199	0.028097	5	144114012	144150647	+	3467	Stk40	GO:0003016;GO:0004672;GO:0005524;GO:0005654;GO:0005829;GO:0005977;GO:0006468;GO:0010468;GO:0030324;GO:0035264;GO:0043066;GO:0043408;GO:0048286;GO:0060425;	K16312	EC:2.7.11.1	T	KOG0583;0VAAZ;09ZDZ;1350N;1CVRI;0DKWC;0USNH;190P5;1ATXD	serine/threonine kinase 40 [Source:RGD Symbol;Acc:727884]	360230	Q7TNL4;A0A0G2JST8
ENSRNOG00000007830	517.4	308.005	726.795	2.35968	1.23859	0.0194479	0.331114	4	168752133	168755023	+	2891	Apold1	GO:0001525;GO:0001525;GO:0001525;GO:0001666;GO:0005576;GO:0005576;GO:0005886;GO:0006869;GO:0006869;GO:0007275;GO:0008289;GO:0008289;GO:0008289;GO:0016020;GO:0016021;GO:0030154;GO:0042118;GO:0042157;GO:0042157;GO:0045601;GO:0045601;	-	-	T;U	0UQ5F;0DM2F;19529;0IWGQ;13QAQ;0VAG4;1AVX0;09ZJ5;1CVXG	apolipoprotein L domain containing 1 [Source:RGD Symbol;Acc:1303123]	444983	Q6B959
ENSRNOG00000007918	78.9128	47.1042	110.721	2.35056	1.23301	0.00640026	0.193871	4	66670618	66846805	+	1961	Tbxas1	GO:0001516;GO:0004796;GO:0004796;GO:0005506;GO:0005789;GO:0006690;GO:0016705;GO:0020037;GO:0020037;GO:0055114;GO:0106256;	K01832	EC:5.3.99.5	Q	0V9SY;1CV43;0UP77;1B040;18T2T;12P50;0DKA3;09VC0;KOG0158	thromboxane A synthase 1 [Source:RGD Symbol;Acc:3826]	24886	P49430
ENSRNOG00000018159	438.384	262.22	614.547	2.34363	1.22874	0.0469369	0.493068	4	118538777	118595580	-	2019	Anxa4	GO:0005509;GO:0005509;GO:0005509;GO:0005544;GO:0005544;GO:0005544;GO:0005544;GO:0005634;GO:0005737;GO:0005886;GO:0006357;GO:0007219;GO:0009986;GO:0012506;GO:0030855;GO:0031965;GO:0032088;GO:0032717;GO:0042802;GO:0048306;GO:0048471;GO:0051059;GO:0005509;GO:0005509;GO:0005544;GO:0005544;GO:0005544;	K17093	-	U	09XNR;12NA8;1B20H;0UGK5;1CQ18;1920P;0V4Z8;0DFBG;KOG0819	annexin A4 [Source:RGD Symbol;Acc:621171]	79124	Q5U362
ENSRNOG00000003291	786.16	470.956	1101.36	2.33857	1.22563	0.0188781	0.326999	13	83972212	83984675	+	2105	Creg1	GO:0005576;GO:0005615;GO:0005615;GO:0005615;GO:0005615;GO:0005667;GO:0005667;GO:0006355;GO:0006355;GO:0008134;GO:0008134;	-	-	K	13T2Y;1CQDG;KOG3374;0V5DG;1AV2S;1954E;09UE1;0UH3Q;0DFPW	cellular repressor of E1A-stimulated genes 1 [Source:RGD Symbol;Acc:1306804]	289185	B2GUX7
ENSRNOG00000036834	101.565	60.8689	142.26	2.33716	1.22476	0.00386407	0.154592	7	144934610	144936803	-	1493	Gpr84	GO:0001604;GO:0004930;GO:0004930;GO:0005887;GO:0007186;GO:0007186;GO:0007218;GO:0008528;GO:0016020;GO:0016021;GO:0016021;GO:0016021;GO:0043235;	K08421	-	T	KOG3656;0DKBV;12RH3;18TUI;0V9UA;0UH8Z;1ASX2;09YWK;1CV5N	G protein-coupled receptor 84 [Source:RGD Symbol;Acc:1585277]	688730	D4ACK0
ENSRNOG00000020193	70.8427	42.4696	99.2157	2.33615	1.22414	0.0114222	0.262246	9	18564927	18773092	+	5641	Runx2	GO:0000785;GO:0000976;GO:0000978;GO:0000987;GO:0001228;GO:0001501;GO:0001649;GO:0001649;GO:0001958;GO:0002051;GO:0002062;GO:0002063;GO:0002076;GO:0003677;GO:0003682;GO:0003700;GO:0003700;GO:0005524;GO:0005634;GO:0005634;GO:0005634;GO:0005654;GO:0005667;GO:0005737;GO:0006355;GO:0008284;GO:0010468;GO:0010628;GO:0019904;GO:0030217;GO:0030278;GO:0030509;GO:0032332;GO:0035115;GO:0040036;GO:0042475;GO:…	K09278	-	K	09TMW;0DEYC;1395F;KOG3982;0UH1H;1ARGY;0V4KY;1CQBV;18U5U	RUNX family transcription factor 2 [Source:RGD Symbol;Acc:2282]	367218	F1M9C5
ENSRNOG00000015812	226.32	136.157	316.482	2.32438	1.21685	0.0394546	0.458036	2	147382866	147392062	-	1950	Tm4sf1	GO:0001825;GO:0001825;GO:0005887;GO:0005887;GO:0016020;GO:0016021;GO:0016021;GO:0016021;GO:0016021;	K24918	-	U	1CPRG;0UG67;18W6G;0DF1P;0IE1N;0V4QN;09TRB;1AWS7;12NBY	transmembrane 4 L six family member 1 [Source:RGD Symbol;Acc:1309652]	295061	D4ACP4
ENSRNOG00000004063	138.418	83.3226	193.514	2.32246	1.21566	0.00567918	0.182877	10	17209212	17291876	+	2753	Sh3pxd2b	GO:0001654;GO:0005515;GO:0007507;GO:0035091;GO:0060348;GO:0071800;GO:0001501;GO:0001501;GO:0001654;GO:0001654;GO:0001654;GO:0001654;GO:0002051;GO:0002102;GO:0005515;GO:0005737;GO:0005737;GO:0006801;GO:0006801;GO:0006801;GO:0007507;GO:0007507;GO:0007507;GO:0007507;GO:0010314;GO:0010628;GO:0016176;GO:0022617;GO:0022617;GO:0032266;GO:0035091;GO:0035091;GO:0040018;GO:0042169;GO:0045600;GO:0048705;GO:…	K24032	-	Z;T;C	18WKS;0V62I;09V2W;1CXQF;KOG4773;13ARM;0UN29;1AVKE;0DGC9	SH3 and PX domains 2B [Source:RGD Symbol;Acc:1309926]	303021	-
ENSRNOG00000020169	90.848	54.7762	126.92	2.31706	1.2123	0.0246636	0.370769	4	78283026	78294845	+	3424	Gimap8	GO:0005525;	-	-	S	0A31S;0DN5R;0VDWW;0URF2;1911H;1CX2A;1B1CX;0IJSD;13MPI	GTPase, IMAP family member 8 [Source:RGD Symbol;Acc:1564570]	500112	Q4KLG2
ENSRNOG00000016617	201.124	121.331	280.918	2.31531	1.21121	0.0308238	0.403123	2	147577089	147693082	-	1647	Wwtr1	GO:0000122;GO:0000122;GO:0001649;GO:0001649;GO:0001894;GO:0001894;GO:0001933;GO:0001933;GO:0003015;GO:0003015;GO:0003713;GO:0003713;GO:0003713;GO:0003713;GO:0003714;GO:0003714;GO:0003714;GO:0005515;GO:0005634;GO:0005634;GO:0005634;GO:0005634;GO:0005634;GO:0005654;GO:0005667;GO:0005667;GO:0005737;GO:0005737;GO:0005737;GO:0005737;GO:0005829;GO:0006355;GO:0006355;GO:0006469;GO:0006469;GO:0008284;GO:…	K16820	-	K	1DCEH;0KCVW;0E5EF;0WCD6;1B9VP;0AZWS;14T1K;0V0XD;196R1	WW domain containing transcription regulator 1 [Source:RGD Symbol;Acc:1559609]	295062	Q4V7E6
ENSRNOG00000000572	284.633	171.795	397.471	2.31363	1.21016	0.00242058	0.120731	20	29731816	29738506	-	5573	Chst3	GO:0000139;GO:0000139;GO:0005975;GO:0005975;GO:0006790;GO:0008146;GO:0008146;GO:0008459;GO:0016020;GO:0016021;GO:0016740;GO:0030206;	K01020	EC:2.8.2.17	G;U	0A11E;191AN;0IIAV;0DKEP;0VD0C;13MM4;1D0E5;0UK91;1AVP5	carbohydrate sulfotransferase 3 [Source:RGD Symbol;Acc:620355]	84468	Q9QZL2
ENSRNOG00000000034	120.943	73.071	168.815	2.31028	1.20807	0.0307601	0.403123	13	49092306	49109050	+	2875	Nuak2	GO:0000287;GO:0004672;GO:0004674;GO:0005524;GO:0005524;GO:0006468;GO:0006468;GO:0030036;GO:0042149;GO:0043066;	K08800	EC:2.7.11.1	T	1AZMH;0DQQ9;KOG0611;1CZTF;0VDF9;0UQ9Z;18XBY;0A2JD;1311I	NUAK family kinase 2 [Source:RGD Symbol;Acc:1359167]	289419	Q66HE5
ENSRNOG00000003703	160.149	96.7622	223.536	2.31016	1.20799	0.00219591	0.114698	13	45042882	45068077	-	2917	Mcm6	GO:0000166;GO:0003677;GO:0003677;GO:0003677;GO:0003678;GO:0003678;GO:0003678;GO:0003678;GO:0003678;GO:0003697;GO:0004386;GO:0005524;GO:0005524;GO:0005524;GO:0005634;GO:0005634;GO:0005634;GO:0005634;GO:0005634;GO:0005654;GO:0005694;GO:0006260;GO:0006260;GO:0006260;GO:0006268;GO:0006270;GO:0006270;GO:0007049;GO:0016787;GO:0016887;GO:0032508;GO:0032508;GO:0042555;GO:0042555;GO:0042555;GO:0042802;	K02542	EC:3.6.4.12	L	0DGF8;18VIT;0V65Z;KOG0480;0UK0K;12P59;1CWTI;09V6E;1B294	minichromosome maintenance complex component 6 [Source:RGD Symbol;Acc:61967]	29685	A9CMB8
ENSRNOG00000048036	2340.87	1414.71	3267.03	2.30932	1.20747	0.0119926	0.267227	16	21050243	21076707	+	5201	Ncan	GO:0005509;GO:0005509;GO:0005540;GO:0005540;GO:0005540;GO:0005576;GO:0007155;GO:0007155;GO:0030246;GO:0005509;	K06794	-	T	0A1VG;0IJ1R;1B2S5;0UNK8;0DG4D;13I7Q;1927G;1CYG4;0VAGB	neurocan [Source:RGD Symbol;Acc:619941]	58982	G3V8R2
ENSRNOG00000002192	224.476	135.711	313.24	2.30814	1.20673	0.0275712	0.38931	14	45982244	46041866	+	3680	Rell1	GO:0005886;GO:0016020;GO:0016021;GO:1900745;GO:1900745;GO:1900745;GO:1900745;GO:0005886;GO:0005886;GO:0015630;GO:0016020;GO:0016021;GO:1900745;GO:1900745;GO:1900745;GO:1900745;GO:1900745;GO:0005886;GO:0016020;GO:0016021;GO:1900745;GO:1900745;GO:1900745;GO:1900745;	-	-	U	09ZMD;1CW07;1ATDT;0DM52;0VAI1;0IGV6;13N8R;0UNXE;18TSU	RELT-like 1 [Source:RGD Symbol;Acc:1307468]	289635	B0BNL7
ENSRNOG00000011718	33.2299	20.1011	46.3586	2.30627	1.20556	0.0369224	0.442801	4	157107469	157123446	+	2327	C1rl	GO:0004252;GO:0004252;GO:0005615;GO:0006508;GO:0006508;	K24791	EC:3.4.21.-	O;E	KOG3627;1B4P4;0A4TJ;0UTES;194NG;1D17F;0VFNF;0DRCP;13NF4	complement C1r subcomponent like [Source:RGD Symbol;Acc:1302936]	408246	Q6IE64
ENSRNOG00000002461	928.557	561.838	1295.28	2.30543	1.20503	0.0207862	0.342145	17	90553394	90627101	-	5699	Nid1	GO:0005509;GO:0005509;GO:0005518;GO:0005518;GO:0005576;GO:0005604;GO:0005604;GO:0005604;GO:0007155;GO:0007160;GO:0007160;GO:0007160;GO:0010811;GO:0016020;GO:0030198;GO:0031012;GO:0032836;GO:0043236;GO:0043237;GO:0043394;GO:0050840;GO:0071944;	K06826	-	W;T	0V7NQ;KOG1214;0UM91;1951V;1B2QA;09WQ7;0DHZY;1CSQK;12TYN	nidogen 1 [Source:RGD Symbol;Acc:3178]	25494	F1LM84
ENSRNOG00000006789	325.162	196.784	453.54	2.30476	1.20462	0.000525476	0.055884	7	70580198	70585084	+	925	Ddit3	GO:0000122;GO:0000122;GO:0000976;GO:0000976;GO:0000978;GO:0001228;GO:0001955;GO:0003677;GO:0003677;GO:0003677;GO:0003700;GO:0003700;GO:0003700;GO:0003700;GO:0005634;GO:0005634;GO:0005634;GO:0005737;GO:0005737;GO:0005770;GO:0006355;GO:0006355;GO:0006355;GO:0006355;GO:0006357;GO:0006915;GO:0006915;GO:0006983;GO:0006986;GO:0006986;GO:0007049;GO:0007050;GO:0007050;GO:0007605;GO:0008134;GO:0008134;GO:…	K04452	-	K	1DG2M;0E96W;0B5Y7;197DN;1BBCY;0ISXY;0V3NR;13FFP;0WIM3	DNA-damage inducible transcript 3 [Source:RGD Symbol;Acc:62391]	29467	Q496Y7
ENSRNOG00000011796	384.524	232.885	536.162	2.30226	1.20305	0.0223666	0.354618	4	157125998	157136829	+	2770	C1r	GO:0003674;GO:0004252;GO:0004252;GO:0004252;GO:0004252;GO:0004252;GO:0005509;GO:0005509;GO:0005509;GO:0005575;GO:0005615;GO:0005615;GO:0006508;GO:0006508;GO:0006958;GO:0006958;GO:0008150;GO:0008236;GO:0031638;GO:0031638;GO:0042802;GO:0072562;GO:0004252;GO:0005509;GO:0006508;GO:0006958;	K01330	EC:3.4.21.41	O;E	1ASZ3;09UJW;KOG3627;13HY4;0DFVH;0UHBT;18TWB;1CQIW;0V5J3	complement C1r [Source:RGD Symbol;Acc:1309091]	312705	B5DEH7
ENSRNOG00000007663	61.0535	36.9865	85.1205	2.30139	1.20251	0.0238387	0.364692	5	105209846	105212173	-	780	LOC100911372	GO:0003735;GO:0003735;GO:0003735;GO:0005634;GO:0005730;GO:0005783;GO:0005829;GO:0005840;GO:0005840;GO:0005840;GO:0006364;GO:0006412;GO:0006412;GO:0008284;GO:0015935;GO:0019901;GO:0022626;GO:0022627;GO:0030425;GO:0031929;GO:0036464;GO:0042274;GO:0043065;GO:0044297;GO:1990904;	-	-	J	KOG1646	40S ribosomal protein S6-like [Source:RGD Symbol;Acc:6493116]	-	-
ENSRNOG00000019048	4208.74	2550.57	5866.9	2.30023	1.20178	0.0100852	0.249457	1	47914759	47921587	-	2063	Sod2	GO:0000302;GO:0000303;GO:0000303;GO:0001306;GO:0001315;GO:0001836;GO:0001889;GO:0003032;GO:0003069;GO:0004784;GO:0004784;GO:0004784;GO:0005739;GO:0005739;GO:0005759;GO:0006357;GO:0006357;GO:0006749;GO:0006801;GO:0006801;GO:0006801;GO:0006979;GO:0007005;GO:0007507;GO:0007626;GO:0008217;GO:0008285;GO:0008630;GO:0008631;GO:0008637;GO:0009791;GO:0010332;GO:0014823;GO:0016491;GO:0019430;GO:0019430;GO:…	K04564	EC:1.15.1.1	P	0DMMM;1CWH5;0UTQD;KOG0876;0V45V;12R7H;1B44M;18Z5H;09ZJN	superoxide dismutase 2 [Source:RGD Symbol;Acc:3732]	24787	P07895
ENSRNOG00000008904	122.617	74.4179	170.816	2.29537	1.19872	0.0290947	0.393553	8	33543258	33661049	-	1820	Fli1	GO:0000976;GO:0000978;GO:0000978;GO:0000981;GO:0001228;GO:0001228;GO:0003677;GO:0003682;GO:0003682;GO:0003700;GO:0003700;GO:0005634;GO:0005634;GO:0005634;GO:0005634;GO:0005634;GO:0005654;GO:0005829;GO:0006355;GO:0006355;GO:0006355;GO:0006355;GO:0006357;GO:0008015;GO:0008015;GO:0009887;GO:0009887;GO:0016604;GO:0030154;GO:0035855;GO:0035855;GO:0043565;GO:0043565;GO:0043565;GO:0043565;GO:0045893;GO:…	K09436	-	K	12SEX;0DMIE;1AXFV;KOG3806;1CRX1;0VAVJ;0UNDY;09ZYT;18Z04	Fli-1 proto-oncogene, ETS transcription factor [Source:RGD Symbol;Acc:1309837]	315532	Q4Z8P1
ENSRNOG00000026653	35.4353	21.5073	49.3633	2.29519	1.19861	0.0335572	0.422774	12	38160464	38161546	+	1083	Hcar2	GO:0001614;GO:0004930;GO:0004930;GO:0005525;GO:0007186;GO:0007186;GO:0016020;GO:0016021;GO:0016021;	K08402	-	T	0IKI5;09TWR;1CPWS;13JB3;1B1UV;0V4VT;18S7G;0DF77;0UHAA	hydroxycarboxylic acid receptor 2 [Source:RGD Symbol;Acc:727952]	353250	Q80Z39
ENSRNOG00000007539	109.728	66.606	152.85	2.29484	1.19839	0.00384164	0.154046	6	45655954	45669148	-	3666	Rsad2	GO:0001650;GO:0003824;GO:0003824;GO:0005739;GO:0005741;GO:0005743;GO:0005783;GO:0005783;GO:0005789;GO:0005811;GO:0009615;GO:0009615;GO:0034157;GO:0034165;GO:0035710;GO:0043367;GO:0043621;GO:0045071;GO:0045071;GO:0046872;GO:0050709;GO:0051536;GO:0051536;GO:0051536;GO:0051539;GO:0051607;GO:0051607;GO:2000553;	K15045	-	T	12T31;0V8TS;18XI7;0IGZE;09XW8;1CU0T;0DJ8V;0UKZM;1AT32	radical S-adenosyl methionine domain containing 2 [Source:RGD Symbol;Acc:620495]	65190	O70600
ENSRNOG00000018166	860.113	523.411	1196.81	2.28657	1.19318	0.000245063	0.0365152	2	199831990	199847629	+	4979	Prkab2	GO:0006629;GO:0006631;GO:0006633;GO:0050790;GO:0050790;GO:0120162;GO:0004679;GO:0005515;GO:0006468;GO:0006629;GO:0006631;GO:0006633;GO:0016301;GO:0016310;GO:0031588;GO:0042802;GO:0050790;GO:0050790;GO:0120162;GO:0120162;	K07199	-	C;G	09WBC;1CSB3;194MK;KOG1616;12P0Q;0V79M;1B4VQ;0DHKM;0UJTQ	protein kinase AMP-activated non-catalytic subunit beta 2 [Source:RGD Symbol;Acc:620905]	64562	Q9QZH4
ENSRNOG00000007457	554.084	337.538	770.63	2.28309	1.19099	0.0428494	0.474472	3	72161189	72171078	-	1889	Serping1	GO:0001869;GO:0004867;GO:0004867;GO:0005615;GO:0030193;GO:0045916;	K04001	-	V	18WYZ;1CP7E;0V7T9;KOG2392;0DI5D;13K9G;1AW12;0UKIJ;09WV9	serpin family G member 1 [Source:RGD Symbol;Acc:735225]	295703	Q6P734
ENSRNOG00000021817	242.604	147.88	337.329	2.2811	1.18973	0.0036539	0.149477	4	145594575	145651053	+	2944	Irak2	GO:0000166;GO:0001959;GO:0001959;GO:0001959;GO:0001959;GO:0002755;GO:0002755;GO:0003674;GO:0004672;GO:0004672;GO:0004674;GO:0005515;GO:0005524;GO:0005524;GO:0005524;GO:0005575;GO:0005634;GO:0005737;GO:0005829;GO:0005886;GO:0006468;GO:0006468;GO:0006954;GO:0006954;GO:0007165;GO:0007165;GO:0007249;GO:0007249;GO:0008150;GO:0019221;GO:0031663;GO:0031663;GO:0032088;GO:0032088;GO:0035556;GO:0042803;GO:…	K04731	EC:2.7.11.1	T	0VCW6;KOG1187;1B38V;1CYMY;18TZG;0DPNZ;0A211;0UT05;13JWZ	interleukin-1 receptor-associated kinase 2 [Source:RGD Symbol;Acc:1309584]	362418	Q4QQS0
ENSRNOG00000001189	408.1	248.76	567.441	2.28108	1.18972	0.0121771	0.269033	20	10668411	10680283	-	4984	Sik1	GO:0000287;GO:0000287;GO:0004672;GO:0004674;GO:0004674;GO:0005524;GO:0005524;GO:0005634;GO:0005737;GO:0006468;GO:0006468;GO:0007346;GO:0008140;GO:0010830;GO:0010868;GO:0019901;GO:0032792;GO:0035556;GO:0035556;GO:0042826;GO:0043153;GO:0043276;GO:0045595;GO:0045721;GO:0055007;	K19008	EC:2.7.11.1	T;B	KOG0586;0DKMS;191W0;1CVG4;0UTU5;1AV3K;09Z5M;0V4ER;12NJJ	salt-inducible kinase 1 [Source:RGD Symbol;Acc:69407]	59329	Q9R1U5
ENSRNOG00000055892	66.5825	40.6377	92.5272	2.27688	1.18706	0.0127165	0.276258	19	28041698	28044531	-	315	AABR07043395.1	-	-	-	-	-	-	-	-
ENSRNOG00000050780	141.733	86.8824	196.585	2.26265	1.17801	0.00383032	0.154011	3	11717667	11723327	-	1990	Fpgs	GO:0001889;GO:0004326;GO:0004326;GO:0004326;GO:0004326;GO:0004326;GO:0004326;GO:0004326;GO:0005524;GO:0005524;GO:0005575;GO:0005737;GO:0005739;GO:0005829;GO:0006536;GO:0006536;GO:0006760;GO:0006760;GO:0007420;GO:0009058;GO:0009058;GO:0009396;GO:0009396;GO:0009396;GO:0016874;GO:0016874;GO:0031100;GO:0046872;GO:0046901;GO:0046901;GO:0046901;	-	-	H	KOG2525;12RBD	folylpolyglutamate synthase [Source:RGD Symbol;Acc:1587713]	-	-
ENSRNOG00000004766	272.724	167.196	378.253	2.26233	1.17781	0.00109833	0.078412	10	11154658	11174861	-	3360	Glis2	GO:0000122;GO:0000122;GO:0000122;GO:0000976;GO:0000976;GO:0000977;GO:0000977;GO:0000978;GO:0000981;GO:0001228;GO:0001228;GO:0001822;GO:0001822;GO:0003677;GO:0003677;GO:0005634;GO:0005634;GO:0005634;GO:0005654;GO:0005737;GO:0005737;GO:0006355;GO:0006355;GO:0006357;GO:0007417;GO:0016607;GO:0016607;GO:0043433;GO:0043433;GO:0045879;GO:0045879;GO:0045892;GO:0045892;GO:0045893;GO:0045893;GO:0045944;GO:…	K09233	-	K	1AYXW;1D0S2;18WP5;0VE01;12THQ;0UPZD;0DRJ5;KOG1721;0A1UT	GLIS family zinc finger 2 [Source:RGD Symbol;Acc:1309177]	302946	D3ZIA9
ENSRNOG00000019638	1178.97	722.994	1634.94	2.26134	1.17718	0.000224513	0.0352351	2	187842885	187863516	-	3213	Lmna	GO:0005634;GO:0005634;GO:0005635;GO:0005635;GO:0005638;GO:0005654;GO:0005829;GO:0005882;GO:0006606;GO:0006997;GO:0006998;GO:0008285;GO:0010628;GO:0016363;GO:0016604;GO:0016607;GO:0030334;GO:0030951;GO:0031647;GO:0031965;GO:0034504;GO:0035861;GO:0055015;GO:0071456;GO:0072201;GO:0090201;GO:0090343;GO:1900114;GO:1900180;GO:1903243;GO:1990683;GO:2001237;GO:0005882;GO:0005882;GO:0005882;GO:0005882;	K12641	-	Z;D;B;Y	1CRS3;0V6SA;0UHSX;12PTX;09VTI;18S9T;0DH1W;KOG0977;1ARIZ	lamin A/C [Source:RGD Symbol;Acc:620456]	60374	G3V8L3
ENSRNOG00000014653	36.9194	22.6418	51.1971	2.26118	1.17708	0.0414781	0.468044	15	41643541	41645685	+	1455	Arl11	GO:0000166;GO:0002244;GO:0002244;GO:0005525;GO:0005525;GO:0005525;GO:0005525;GO:0005886;GO:0006886;GO:0016192;	K07959	-	U	0UPWF;1CW3V;0DM8P;1ATRG;KOG0070;0VAM9;09XKW;195YG;13QQ3	ADP-ribosylation factor like GTPase 11 [Source:RGD Symbol;Acc:1308083]	364396	Q5BK71
ENSRNOG00000000123	716.358	440.011	992.705	2.25609	1.17383	0.0108301	0.257391	5	147246037	147270957	+	2395	Rnf19b	GO:0000151;GO:0000209;GO:0004842;GO:0004842;GO:0005737;GO:0005783;GO:0005783;GO:0005829;GO:0006511;GO:0016020;GO:0016021;GO:0016567;GO:0016567;GO:0016740;GO:0031624;GO:0032436;GO:0042267;GO:0042267;GO:0043130;GO:0043130;GO:0044194;GO:0044194;GO:0044194;GO:0046872;GO:0051865;GO:0051865;GO:0061630;GO:0061630;GO:0061630;GO:0000151;GO:0000209;GO:0004842;GO:0004842;GO:0005737;GO:0005783;GO:0006511;GO:…	K11973	EC:2.3.2.31	O	KOG1815	ring finger protein 19B [Source:RGD Symbol;Acc:1305470]	313806	D4A995
ENSRNOG00000037134	79.5156	48.8413	110.19	2.25608	1.17382	0.0252528	0.374658	3	117897738	117990289	-	1869	Shc4	GO:0006915;GO:0008284;GO:0008284;GO:0010468;GO:0019904;GO:0030971;GO:0030971;GO:0035556;GO:0048863;GO:0048863;	K17449	-	T	KOG3697;1B045;0DH33;09VUW;12P9B;1959N;1CRTC;0V6TI;0UJMV	SHC adaptor protein 4 [Source:RGD Symbol;Acc:1583644]	679845	D4A3K2
ENSRNOG00000050794	569.014	349.784	788.245	2.25352	1.17218	0.000489434	0.0536755	10	39390581	39405311	-	1176	Pdlim4	GO:0001725;GO:0005515;GO:0005634;GO:0005737;GO:0005856;GO:0019903;GO:0019903;GO:0030027;GO:0031532;GO:0031941;GO:0042803;GO:0046872;GO:0048471;GO:0051393;	K23353	-	Z;T	KOG1703;09Z3U;0VA18;0UN06;1AXGH;1CQB5;190D7;0DKJE;13DHP	PDZ and LIM domain 4 [Source:RGD Symbol;Acc:3575]	24915	P36202
ENSRNOG00000014456	488.201	300.268	676.135	2.25178	1.17106	0.00337881	0.143271	9	61655963	61675873	+	1621	Coq10b	-	K18588	-	I	18YGY;12PAZ;09U4K;0V53P;0DFE7;KOG3177;0UPM8;1AUGJ;1CQ3Z	coenzyme Q10B [Source:RGD Symbol;Acc:1359509]	301416	Q5I0I9;A0A0G2JSW8
ENSRNOG00000006946	58.8141	36.2222	81.4061	2.24741	1.16826	0.0159646	0.303061	7	70612103	70620890	+	3155	Arhgap9	GO:0005096;GO:0005515;GO:0005547;GO:0007165;GO:0005096;GO:0005096;GO:0005547;GO:0005737;GO:0007165;GO:0007165;GO:0043087;GO:0043547;	K20634	-	T	0URC1;0V98A;0DJQF;09YAU;1CUHD;12N2W;KOG1450	Rho GTPase activating protein 9 [Source:RGD Symbol;Acc:1305342]	362893	Q6AXS7
ENSRNOG00000010100	178.401	110.002	246.799	2.24358	1.1658	0.00390395	0.154592	9	64077845	64096265	-	1474	Tyw5	GO:0000049;GO:0000049;GO:0005506;GO:0016706;GO:0016706;GO:0031591;GO:0031591;GO:0042803;	K18066	EC:1.14.11.42	J;T;B	KOG2132;0DG1E;1AW7Q;1CQR0;191KM;14F8A;0UKRB;09URU;0V5RA	tRNA-yW synthesizing protein 5 [Source:RGD Symbol;Acc:1311269]	301419	D3ZY75
ENSRNOG00000059857	382.806	236.046	529.567	2.2435	1.16575	0.000553166	0.0559466	7	140349138	140356209	-	1609	Rnd1	GO:0003924;GO:0003924;GO:0003924;GO:0005102;GO:0005102;GO:0005525;GO:0005525;GO:0005525;GO:0005856;GO:0005886;GO:0005886;GO:0005912;GO:0005912;GO:0005938;GO:0007015;GO:0007015;GO:0007015;GO:0007162;GO:0007162;GO:0007163;GO:0007264;GO:0007264;GO:0008360;GO:0015629;GO:0016322;GO:0016322;GO:0016477;GO:0019901;GO:0030865;GO:0031410;GO:0032956;GO:0042995;GO:0043231;GO:0043231;	K07531	-	-	-	Rho family GTPase 1 [Source:RGD Symbol;Acc:1306338]	362993	Q5FVG9
ENSRNOG00000009088	1657.77	1022.73	2292.82	2.24185	1.16469	0.000532892	0.055884	7	26946125	26984400	-	3430	Txnrd1	GO:0001650;GO:0004791;GO:0005654;GO:0016491;GO:0016668;GO:0045454;GO:0050660;GO:0055114;GO:0000166;GO:0004791;GO:0004791;GO:0004791;GO:0004791;GO:0016491;GO:0016491;GO:0016491;GO:0016668;GO:0016668;GO:0045454;GO:0045454;GO:0050660;GO:0050660;GO:0055114;GO:0098869;	K22182	EC:1.8.1.9	Q;O	1CVEN;09UWI;KOG0405;0UPJN;12PHT;0V5W9;1AUW3;0DKK6;190DN	thioredoxin reductase 1 [Source:RGD Symbol;Acc:61959]	58819	-
ENSRNOG00000020164	237.175	146.686	327.665	2.23379	1.15949	0.00159115	0.096001	1	215515764	215536980	-	705	Ifitm10	GO:0016021;GO:0016021;	-	-	S	0DGBP;0V61Z;0UI25;194KZ;09V2C;1ATMY;0J92W;13WPD;1CR15	interferon induced transmembrane protein 10 [Source:RGD Symbol;Acc:1563319]	-	-
ENSRNOG00000020848	761.125	470.785	1051.47	2.23343	1.15926	0.000309617	0.0410083	1	84044551	84067066	+	2096	Coq8b	GO:0000166;GO:0005524;GO:0005737;GO:0005739;GO:0005739;GO:0005739;GO:0005829;GO:0005886;GO:0006468;GO:0006744;GO:0006744;GO:0006744;GO:0006744;GO:0006744;GO:0016020;GO:0016021;GO:0016301;GO:0016301;GO:0016310;GO:0016740;GO:0021692;GO:0021692;GO:0031314;GO:0031966;	K08869	-	S;G	0VBIQ;1AWIN;18UYS;1CUH0;12NR4;0A0NM;0UTHY;0DN9Z;KOG1234	coenzyme Q8B [Source:RGD Symbol;Acc:1311356]	308453	Q6AY19
ENSRNOG00000002238	331.858	205.285	458.431	2.23314	1.15907	0.0266806	0.383657	11	68306659	68349238	-	3276	Sema5b	GO:0001755;GO:0005515;GO:0007411;GO:0016020;GO:0016021;GO:0016021;GO:0030154;GO:0030215;GO:0030215;GO:0030215;GO:0030335;GO:0045499;GO:0048675;GO:0048675;GO:0048675;GO:0048843;GO:0050908;GO:0050908;GO:0050919;GO:0071526;GO:0097485;GO:0097485;GO:1990138;GO:1990138;	K06841	-	T	KOG3611	semaphorin 5B [Source:RGD Symbol;Acc:1308914]	303901	-
ENSRNOG00000010691	78.7499	48.7631	108.737	2.2299	1.15698	0.00916217	0.237942	19	830877	838099	-	1609	Cmtm3	GO:0001835;GO:0001835;GO:0005737;GO:0005737;GO:0005829;GO:0005829;GO:0016020;GO:0016020;GO:0016020;GO:0016021;GO:0016021;GO:0031410;GO:0031410;GO:0031965;GO:0031965;GO:0050861;GO:0050861;	-	-	V	1CZPX;KOG4788;192MZ;1B3G7;13RCV;0A2ZK;0VDUS;0USQ0;0DQM8	CKLF-like MARVEL transmembrane domain containing 3 [Source:RGD Symbol;Acc:1308763]	291813	B5DFL6
ENSRNOG00000042785	416.985	258.285	575.686	2.22888	1.15632	0.0044804	0.163312	5	150684133	150704117	-	3739	Sesn2	GO:0001932;GO:0001932;GO:0001932;GO:0005092;GO:0005092;GO:0005634;GO:0005634;GO:0005737;GO:0005737;GO:0005737;GO:0005739;GO:0006111;GO:0006111;GO:0006635;GO:0006635;GO:0007005;GO:0007005;GO:0009749;GO:0009749;GO:0016239;GO:0016239;GO:0016239;GO:0016684;GO:0016684;GO:0016684;GO:0030308;GO:0030308;GO:0030330;GO:0030330;GO:0030330;GO:0031588;GO:0031588;GO:0031932;GO:0031932;GO:0031932;GO:0032042;GO:…	K20394	-	S;J	KOG3746;09WFN;1ARDG;0V7E5;0DH5Z;0UTRC;18ZH0;12PWZ;1CUY2	sestrin 2 [Source:RGD Symbol;Acc:1566319]	502988	B2GUV6
ENSRNOG00000017801	3330.7	2063.31	4598.09	2.2285	1.15607	0.000226894	0.0353044	7	121480723	121482772	+	1940	Atf4	GO:0000122;GO:0000122;GO:0000122;GO:0000976;GO:0000977;GO:0000978;GO:0000978;GO:0000978;GO:0000981;GO:0000981;GO:0001085;GO:0001228;GO:0001228;GO:0001228;GO:0003677;GO:0003677;GO:0003677;GO:0003700;GO:0003700;GO:0003700;GO:0003700;GO:0003700;GO:0005634;GO:0005634;GO:0005634;GO:0005634;GO:0005634;GO:0005634;GO:0005654;GO:0005667;GO:0005667;GO:0005737;GO:0005737;GO:0005737;GO:0005737;GO:0005737;GO:…	K04374	-	K	1D0BZ;1ARUV;0UU7X;12N2V;0DR6K;KOG4571;18U4Y;0VEF5;0A3JX	activating transcription factor 4 [Source:RGD Symbol;Acc:621863]	79255	Q9ES19;B0BMW3
ENSRNOG00000049034	91.0876	56.4461	125.729	2.22742	1.15537	0.0070347	0.204907	3	11811962	11825640	+	853	Ptrh1	GO:0004045;GO:0004045;GO:0004045;GO:0004045;	K01056	EC:3.1.1.29	J	KOG2255;0VAND;13P7M;0DMA0;09ZRW;1CW54	peptidyl-tRNA hydrolase 1 homolog [Source:RGD Symbol;Acc:1310165]	362113	-
ENSRNOG00000018082	207.247	128.592	285.901	2.22332	1.15272	0.0243211	0.368971	18	56520740	56534415	-	2877	Slc26a2	GO:0001503;GO:0005887;GO:0006811;GO:0008271;GO:0008272;GO:0015116;GO:0015116;GO:0016020;GO:0016021;GO:0055085;GO:1902358;GO:1902358;	K14701	-	P	18SMV;1CRBC;0UGWQ;0V5WY;09UX5;0DG6J;12Q5P;KOG0236;1AYJ7	solute carrier family 26 member 2 [Source:RGD Symbol;Acc:620622]	117267	O70531
ENSRNOG00000014956	116.605	72.4127	160.797	2.22056	1.15092	0.00395754	0.155008	9	81655629	81666706	+	2955	Slc11a1	GO:0001818;GO:0001819;GO:0002309;GO:0002606;GO:0002827;GO:0005384;GO:0005764;GO:0005770;GO:0005886;GO:0006826;GO:0006826;GO:0006828;GO:0006876;GO:0006879;GO:0006879;GO:0006909;GO:0006954;GO:0007035;GO:0009617;GO:0009617;GO:0010008;GO:0010628;GO:0015707;GO:0016020;GO:0016020;GO:0016020;GO:0016021;GO:0030001;GO:0030001;GO:0030670;GO:0030670;GO:0032147;GO:0032496;GO:0032729;GO:0034341;GO:0042060;GO:…	K12347	-	P	KOG1291	solute carrier family 11 member 1 [Source:RGD Symbol;Acc:1601463]	316519	P70553
ENSRNOG00000019838	66.1302	41.1082	91.1522	2.21738	1.14885	0.0392088	0.456392	1	85312528	85317968	-	567	Gmfg	GO:0003779;GO:0003779;GO:0007165;GO:0008083;GO:0034316;GO:0034316;GO:0034316;GO:0071846;GO:0071933;GO:0071933;GO:2000249;GO:2000249;	-	-	W	1AWJN;1CRNX;KOG1736;0DGYP;13SJP;0UIXT;09VQ2;192TD;0VJ63	glia maturation factor, gamma [Source:RGD Symbol;Acc:620506]	113940	Q80T18
ENSRNOG00000052038	112.811	70.2181	155.404	2.21316	1.14611	0.00569577	0.182877	16	19654798	19669196	-	1466	Haus8	-	K16591	-	-	-	HAUS augmin-like complex, subunit 8 [Source:RGD Symbol;Acc:1311565]	290626	Q5BK57
ENSRNOG00000025051	90.4311	56.3641	124.498	2.20882	1.14327	0.00901344	0.237381	5	133864798	133878830	+	4915	Tal1	GO:0000118;GO:0000118;GO:0000122;GO:0000122;GO:0000785;GO:0000785;GO:0000976;GO:0000976;GO:0000978;GO:0000978;GO:0000978;GO:0000981;GO:0000981;GO:0000981;GO:0000981;GO:0001085;GO:0001085;GO:0001525;GO:0001525;GO:0003674;GO:0003677;GO:0003677;GO:0003677;GO:0003682;GO:0003682;GO:0003682;GO:0003700;GO:0003700;GO:0005575;GO:0005634;GO:0005634;GO:0005634;GO:0005654;GO:0005667;GO:0005667;GO:0005667;GO:…	K09068	-	K	1CYEE;0UPC5;KOG4029;13W7N;0A1TT;0DPG3;0VCPJ	TAL bHLH transcription factor 1, erythroid differentiation factor [Source:RGD Symbol;Acc:1306748]	313507	D3Z921
ENSRNOG00000013948	268.766	167.562	369.969	2.20795	1.14271	0.0180863	0.32158	4	66011915	66062089	-	5081	Zc3hav1	GO:0003950;GO:0003950;GO:0005829;GO:0009615;GO:0045071;GO:0046872;GO:0046872;GO:0046872;GO:0061014;	K15259	EC:2.4.2.30	S;K	1CRAF;09VC4;0V6BA;0IEI4;12P7S;0DGKK;18YWN;1AXY2;0UN5G	zinc finger CCCH-type containing, antiviral 1 [Source:RGD Symbol;Acc:628694]	252832	A2RRT6
ENSRNOG00000010721	37.6155	23.4823	51.7486	2.20373	1.13995	0.0456425	0.484785	15	24167486	24199341	-	2737	Dlgap5	GO:0005634;GO:0005634;GO:0005634;GO:0005737;GO:0005739;GO:0005829;GO:0007052;GO:0007059;GO:0007346;GO:0008017;GO:0023052;GO:0023052;GO:0031616;GO:0031616;GO:0031616;GO:0034451;GO:0051382;GO:0051642;	K16804	-	Z;T	195PP;09YMT;0V9JJ;13KBB;1CUW5;0DK2D;0UNYW;KOG3971;1AW1X	DLG associated protein 5 [Source:RGD Symbol;Acc:1311247]	289997	B1WC75
ENSRNOG00000031927	673.861	421.095	926.628	2.20052	1.13785	0.0410209	0.465752	1	99762253	99769488	+	1169	Klk6	GO:0004252;GO:0004252;GO:0004252;GO:0004252;GO:0005575;GO:0005576;GO:0005576;GO:0005737;GO:0005737;GO:0006508;GO:0006508;GO:0006508;GO:0008233;GO:0008233;GO:0008236;GO:0010975;GO:0016787;GO:0030141;GO:0045745;GO:0045745;	K08667	EC:3.4.21.-	O	1B0SQ;1CZEZ;KOG3627;0UTMY;0A2R7;0DQD3;0V7RP;13QAC;195YR	kallikrein related-peptidase 6 [Source:RGD Symbol;Acc:3419]	29245	O54854
ENSRNOG00000059463	1092.26	682.594	1501.93	2.20033	1.13772	0.000354163	0.0435645	2	189609800	189615366	+	2411	Slc39a1	GO:0001701;GO:0001701;GO:0005102;GO:0005385;GO:0005385;GO:0005385;GO:0005886;GO:0005886;GO:0005886;GO:0006829;GO:0006829;GO:0016020;GO:0016020;GO:0016020;GO:0016020;GO:0016021;GO:0030001;GO:0030001;GO:0046873;GO:0046873;GO:0048701;GO:0048701;GO:0055085;GO:0055085;GO:0060173;GO:0060173;GO:0071577;GO:0071577;GO:0071577;	K14709	-	-	-	solute carrier family 39 member 1 [Source:RGD Symbol;Acc:1305241]	361986	B5DEF5
ENSRNOG00000002232	239.531	149.728	329.334	2.19955	1.13721	0.00268807	0.127771	14	7226586	7384876	-	4908	Aff1	GO:0003674;GO:0005575;GO:0005634;GO:0005634;GO:0005634;GO:0005634;GO:0008023;GO:0008150;GO:0010468;GO:0010468;GO:0010468;GO:0032783;GO:0045893;GO:0005634;GO:0008023;GO:0010468;	K15184	-	K	1AUUS;1CPFG;0V6ID;13I7E;09VJ9;0IGJB;0UKUW;18T0P;0DERP	AF4/FMR2 family, member 1 [Source:RGD Symbol;Acc:1307940]	305152	D3ZBU5
ENSRNOG00000039415	117.768	73.7932	161.744	2.19185	1.13215	0.0146509	0.292432	18	31095613	31109025	-	5461	Fchsd1	GO:0005515;GO:0007274;GO:0008289;GO:0030833;GO:0030838;GO:0030838;GO:0031594;GO:0032437;GO:0032437;GO:0042995;GO:0044803;GO:0044803;GO:0055037;	K20125	-	Z;T	0WG1N;0INNZ;0E7SU;1DESN;13BS4;0B3MQ;1BASK;0V2UH;1972V	FCH and double SH3 domains 1 [Source:RGD Symbol;Acc:1308240]	307482	D4AD36
ENSRNOG00000006167	55.2184	34.6172	75.8197	2.19023	1.13108	0.0214815	0.346397	7	14403592	14418950	-	3968	Rasal3	GO:0005737;GO:0005737;GO:0007165;GO:0007165;GO:0042802;GO:0042802;GO:0043087;GO:0043087;GO:0046580;GO:0046580;GO:0051142;GO:0051142;GO:0098562;GO:0098562;	K17634	-	T	0UQKS;0VD0S;1B4S7;0A25A;KOG3508;12UDX;1CYSM;0DPTI;18T33	RAS protein activator like 3 [Source:RGD Symbol;Acc:1309019]	314596	D3ZWW3
ENSRNOG00000020653	150.59	94.4742	206.706	2.18797	1.12959	0.0310536	0.405257	8	21984914	21995806	-	2741	S1pr2	GO:0001664;GO:0003376;GO:0003376;GO:0004930;GO:0005178;GO:0005886;GO:0007186;GO:0007186;GO:0008528;GO:0010800;GO:0010800;GO:0016021;GO:0031532;GO:0038036;GO:0038036;GO:0046847;GO:0090394;GO:1903142;	K04292	-	T	0VAN7;1CW4X;0DM9T;18UUW;0IHTX;1B2ME;13HU2;0UUB6;09ZRR	sphingosine-1-phosphate receptor 2 [Source:RGD Symbol;Acc:68334]	29415	P47752
ENSRNOG00000014387	196.23	123.295	269.165	2.1831	1.12638	0.00270147	0.128074	3	111160205	111163425	+	1569	Chac1	GO:0003839;GO:0003839;GO:0003839;GO:0005112;GO:0005112;GO:0005112;GO:0005737;GO:0005737;GO:0005794;GO:0005802;GO:0005802;GO:0005802;GO:0005829;GO:0005829;GO:0005829;GO:0006751;GO:0006751;GO:0006751;GO:0006915;GO:0006986;GO:0007219;GO:0007399;GO:0010955;GO:0010955;GO:0010955;GO:0016829;GO:0022008;GO:0022008;GO:0022008;GO:0045746;GO:0045746;GO:0045746;GO:0061928;GO:0061928;GO:0070059;GO:0070059;	K07232	EC:4.3.2.7	P	KOG3182;18TEJ;0DS4S;0US6U;1AXPF;0VFB3;1D26M;0A5IM;13PF3	ChaC glutathione-specific gamma- glutamylcyclotransferase 1 [Source:RGD Symbol;Acc:1307153]	362196	B3STU3
ENSRNOG00000020468	404.042	254.019	554.066	2.1812	1.12512	0.000979871	0.0749519	18	25984638	25997555	-	2677	Stard4	GO:0005737;GO:0005737;GO:0005783;GO:0005783;GO:0005829;GO:0005829;GO:0008289;GO:0008289;GO:0010873;GO:0010873;GO:0010879;GO:0010879;GO:0010879;GO:0015485;GO:0015485;GO:0015485;GO:0015485;GO:0015485;GO:0031410;GO:0031410;GO:0032367;GO:0032367;GO:0032367;GO:0032367;GO:0032367;GO:0034435;GO:0070508;GO:0070508;GO:0070508;GO:0070859;GO:0070859;GO:0120009;GO:0120020;GO:0120020;GO:0120020;	-	-	I	0B449;1975J;1DF2S;0E83N;0IPNZ;0V319;0WGKB;13CJW;1BAXD	StAR-related lipid transfer domain containing 4 [Source:RGD Symbol;Acc:1309475]	291699	D3Z9I9
ENSRNOG00000059750	53.75	33.799	73.7011	2.18057	1.12471	0.0312511	0.406667	2	197996981	198002625	-	709	AC141102.1	-	-	-	-	-	-	-	-
ENSRNOG00000020843	1622.88	1021.02	2224.75	2.17895	1.12364	0.0452286	0.483209	1	101448346	101449829	-	552	LOC100360087	GO:0003674;GO:0005506;GO:0005506;GO:0005737;GO:0005737;GO:0006826;GO:0006826;GO:0006879;GO:0006879;GO:0006879;GO:0006879;GO:0006880;GO:0008043;GO:0008043;GO:0008198;GO:0008199;GO:0008199;GO:0008199;GO:0010288;GO:0042802;GO:0044754;GO:0046872;	K13625	-	P	0KDTW;196WV;13GDX;0WJBW;1DGGX;1BAAE;0E9N9;0V3YQ;0B6KY	ferritin light chain 1-like [Source:RGD Symbol;Acc:2322860]	29292	P02793
ENSRNOG00000008180	393.034	247.37	538.699	2.17771	1.12281	0.000950894	0.0739787	5	16526058	16642648	+	3430	Lyn	GO:0001782;GO:0001817;GO:0001933;GO:0001934;GO:0002431;GO:0002513;GO:0002576;GO:0002762;GO:0002768;GO:0002774;GO:0002902;GO:0004672;GO:0004672;GO:0004713;GO:0004713;GO:0004713;GO:0004715;GO:0005515;GO:0005524;GO:0005634;GO:0005634;GO:0005737;GO:0005794;GO:0005886;GO:0005886;GO:0006468;GO:0006468;GO:0006974;GO:0007169;GO:0008284;GO:0008285;GO:0008285;GO:0009725;GO:0010976;GO:0017124;GO:0018108;GO:…	K05854	EC:2.7.10.2	T	0UNKM;195ZK;KOG0197;0DJSM;1AWSY;09YCT;12R3M;1CUJR;0V5FJ	LYN proto-oncogene, Src family tyrosine kinase [Source:RGD Symbol;Acc:621017]	81515	Q07014
ENSRNOG00000004603	212.927	134.029	291.826	2.17733	1.12256	0.00224091	0.115516	7	63973279	64251110	-	3258	Srgap1	GO:0005096;GO:0005096;GO:0005096;GO:0005515;GO:0005737;GO:0007165;GO:0007165;GO:0007266;GO:0016477;GO:0030336;GO:0031267;GO:0043547;	K07526	-	T	KOG3565;1AUAZ;0V5QS;0DG0Y;0UHM1;1CQQK;12NWK;09UR6	SLIT-ROBO Rho GTPase activating protein 1 [Source:RGD Symbol;Acc:1566260]	314903	F1M287
ENSRNOG00000006681	233.455	146.965	319.946	2.17702	1.12236	0.00179974	0.103684	5	2603505	2632030	-	2946	Rdh10	GO:0001656;GO:0001701;GO:0002138;GO:0002138;GO:0004745;GO:0004745;GO:0005737;GO:0007601;GO:0008406;GO:0009887;GO:0014032;GO:0016020;GO:0016021;GO:0016491;GO:0031076;GO:0035115;GO:0042572;GO:0042574;GO:0043583;GO:0043584;GO:0048568;GO:0048703;GO:0052650;GO:0055114;GO:0060431;GO:0060449;	K11151	EC:1.1.1.-	Q	KOG1201;0DJ5E;1CTXA;0UHPJ;0VBEB;1ATA6;192UK;09Z8W;12XSB	retinol dehydrogenase 10 [Source:RGD Symbol;Acc:727793]	353252	Q80ZF7
ENSRNOG00000024931	80.1728	50.487	109.859	2.17598	1.12166	0.012618	0.275764	1	222102437	222118459	-	5173	Ccdc88b	GO:0001819;GO:0001819;GO:0005737;GO:0005737;GO:0005813;GO:0008017;GO:0016020;GO:0016020;GO:0030705;GO:0030705;GO:0030705;GO:0031122;GO:0042102;GO:0042102;GO:0042832;GO:0042832;GO:0050870;GO:0050870;GO:0051959;	-	-	-	-	coiled-coil domain containing 88B [Source:RGD Symbol;Acc:1311475]	293698	D3ZTC4
ENSRNOG00000008246	213.307	134.451	292.162	2.173	1.11969	0.00531203	0.178326	6	26821255	26828972	-	3836	Emilin1	GO:0003180;GO:0003180;GO:0005515;GO:0005576;GO:0005615;GO:0005615;GO:0007160;GO:0007160;GO:0010628;GO:0010628;GO:0010629;GO:0010629;GO:0010811;GO:0010811;GO:0016477;GO:0016477;GO:0016525;GO:0016525;GO:0030023;GO:0030023;GO:0030023;GO:0030198;GO:0030198;GO:0030512;GO:0030512;GO:0030948;GO:0030948;GO:0031012;GO:0031012;GO:0032966;GO:0032966;GO:0034668;GO:0034668;GO:0042802;GO:0042802;GO:0042802;GO:…	K24246	-	W	0V4G9;0DEU2;09TH9;12QJG;0IKJ2;1CPHU;0UFVH	elastin microfibril interfacer 1 [Source:RGD Symbol;Acc:1311209]	298845	D3Z9E1
ENSRNOG00000020587	324.638	204.647	444.629	2.17266	1.11946	0.00531893	0.178326	1	220854403	220861420	+	1573	Efemp2	GO:0005509;GO:0005615;GO:0008201;GO:0031012;GO:0042803;GO:0048251;GO:0048251;GO:0071953;GO:1905609;GO:0001527;GO:0005509;GO:0005509;GO:0005604;GO:0005615;GO:0005615;GO:0008201;GO:0031012;GO:0035904;GO:0042803;GO:0048251;GO:0048251;GO:0048251;GO:0060414;GO:0060840;GO:0071953;GO:0097084;GO:1904026;GO:1904028;GO:1904706;GO:1904831;GO:1905609;GO:0005509;GO:0005615;GO:0048251;	K19866	-	T	0DJ1C;KOG1217;09XPN;1CTSV;0V8MB;12QNQ;0UMQ2	EGF containing fibulin extracellular matrix protein 2 [Source:RGD Symbol;Acc:1359496]	293677	Q5XI84
ENSRNOG00000037613	617.881	389.541	846.221	2.17235	1.11926	0.000547459	0.055884	10	56001799	56008885	-	4071	Kdm6b	GO:0005634;GO:0005634;GO:0006338;GO:0008013;GO:0010468;GO:0016577;GO:0043565;GO:0045165;GO:0045446;GO:0045944;GO:0046872;GO:0048333;GO:0055007;GO:0070301;GO:0071557;GO:0071557;GO:0071557;GO:0071558;GO:0071558;GO:0071558;GO:0120162;	K11448	EC:1.14.11.68	S;P;K;B	KOG1246;13F8S;0WIFR;KOG1124;0V3KT;0B5T8;0E93T;1DFZT	lysine demethylase 6B [Source:RGD Symbol;Acc:1307629]	363630	-
ENSRNOG00000008401	68.2948	43.1203	93.4693	2.16764	1.11612	0.0223504	0.354618	7	119999472	120027026	-	3420	Card10	GO:0005737;GO:0007250;GO:0007250;GO:0042981;GO:0042981;GO:0050700;GO:0090051;GO:0090051;GO:1900182;GO:1900182;GO:0042981;	K20912	-	F;T	0A0SS;18WPS;KOG0708;0DNE0;1CXB8;1AUA3;1353H;0VBP8;0UTG1	caspase recruitment domain family, member 10 [Source:RGD Symbol;Acc:1304949]	315120	D4A425
ENSRNOG00000057058	37.5372	23.7073	51.3671	2.16672	1.11551	0.0406423	0.464174	10	103438303	103450947	+	979	Cd300a	GO:0016020;GO:0016021;GO:0016020;GO:0016021;	K06719	-	-	-	Cd300a molecule [Source:RGD Symbol;Acc:1583719]	501736	-
ENSRNOG00000028690	42.2254	26.6684	57.7825	2.1667	1.1155	0.0343459	0.425931	3	24600603	24601063	-	461	LOC100362366	GO:0003735;GO:0005840;GO:0006412;	-	-	J	KOG0187	40S ribosomal protein S17-like [Source:RGD Symbol;Acc:2318320]	100362366	-
ENSRNOG00000019996	1576.04	995.616	2156.46	2.16596	1.115	0.0188069	0.326699	2	207108552	207128554	+	2487	Slc16a1	GO:0005813;GO:0005886;GO:0005886;GO:0005887;GO:0005887;GO:0006629;GO:0007098;GO:0008028;GO:0008028;GO:0009925;GO:0015129;GO:0015129;GO:0015718;GO:0015718;GO:0016021;GO:0016324;GO:0016328;GO:0022857;GO:0030054;GO:0032094;GO:0035879;GO:0042593;GO:0043231;GO:0045202;GO:0050796;GO:0051780;GO:0055085;	K08179	-	P	0B38A;19711;1DEJG;1BANW;0V2PQ;0E7IY;0IMVV;13B4I;0WFKC	solute carrier family 16 member 1 [Source:RGD Symbol;Acc:3690]	25027	P53987
ENSRNOG00000000488	552.737	349.236	756.239	2.16541	1.11464	0.00646804	0.194629	20	7136007	7138980	+	324	Hmga1	GO:0000785;GO:0003677;GO:0005634;GO:0006355;	K09282	-	K	13YDG;0DV8I;1D4EN;0A8TM;0VJQ1;0J4ZT	high mobility group AT-hook 1 [Source:RGD Symbol;Acc:628699]	117062	Q8K585
ENSRNOG00000017401	92.7382	58.6036	126.873	2.16493	1.11432	0.0106278	0.256638	5	157423213	157501737	+	3387	Tmco4	GO:0016020;GO:0016021;GO:0016020;GO:0016021;	-	-	S;G;E	1CVET;KOG2385;09Z4K;0DI6Y;0UT66;0VA1U;18YXS;1B12F;12S6J	transmembrane and coiled-coil domains 4 [Source:RGD Symbol;Acc:1566357]	500573	Q499U8
ENSRNOG00000006995	629.536	397.954	861.118	2.16387	1.11361	0.0127165	0.276258	7	137142170	137335208	+	5877	Ano6	GO:0002407;GO:0002407;GO:0002407;GO:0002543;GO:0003674;GO:0005227;GO:0005229;GO:0005244;GO:0005247;GO:0005254;GO:0005575;GO:0005886;GO:0005886;GO:0005886;GO:0005887;GO:0006812;GO:0006821;GO:0007596;GO:0007596;GO:0007596;GO:0016020;GO:0016021;GO:0017121;GO:0017128;GO:0030501;GO:0030501;GO:0030501;GO:0032060;GO:0034707;GO:0034767;GO:0034767;GO:0034767;GO:0035590;GO:0035630;GO:0035725;GO:0042802;GO:…	K19500	-	U	KOG2514	anoctamin 6 [Source:RGD Symbol;Acc:1304765]	315272	F1M5Z5
ENSRNOG00000006068	449.412	284.105	614.719	2.1637	1.1135	0.0168923	0.313161	7	136182224	136403012	+	2229	Tmem117	GO:0005783;GO:0005886;GO:0070059;	-	-	S	09TSM;1CPSS;1AXJR;0IFTG;0DF2Y;1911F;0V4RX;1382B;0UP08	transmembrane protein 117 [Source:RGD Symbol;Acc:1562562]	-	-
ENSRNOG00000000457	136.277	86.1531	186.401	2.1636	1.11343	0.0100469	0.249457	20	3979035	3989669	+	4137	Tap1	GO:0000166;GO:0002250;GO:0002376;GO:0002479;GO:0002479;GO:0005524;GO:0005524;GO:0005524;GO:0005524;GO:0005783;GO:0006952;GO:0015433;GO:0015433;GO:0015433;GO:0015833;GO:0015833;GO:0015833;GO:0016020;GO:0016020;GO:0016020;GO:0016021;GO:0016021;GO:0016021;GO:0016021;GO:0016887;GO:0019885;GO:0023029;GO:0030176;GO:0030176;GO:0030176;GO:0034451;GO:0042287;GO:0042287;GO:0042288;GO:0042605;GO:0042626;GO:…	K05653	EC:7.4.2.14	Q;U	KOG0058;09UWX;0UKTV;0V5WR;18U06;1AVK0;1CU6J;12RBY;0DG6C	transporter 1, ATP binding cassette subfamily B member [Source:RGD Symbol;Acc:3817]	24811	P97561;P97949
ENSRNOG00000019606	97.8842	61.8897	133.879	2.16318	1.11315	0.0107101	0.256768	10	59831241	59860987	+	3010	Trpv3	GO:0005216;GO:0005216;GO:0005216;GO:0005216;GO:0005216;GO:0005261;GO:0005261;GO:0005262;GO:0005515;GO:0005887;GO:0006811;GO:0006811;GO:0006811;GO:0009266;GO:0009266;GO:0009266;GO:0009266;GO:0009408;GO:0016020;GO:0016020;GO:0016020;GO:0016020;GO:0016020;GO:0016021;GO:0016021;GO:0016021;GO:0042636;GO:0042636;GO:0043235;GO:0043235;GO:0055085;GO:0055085;GO:0090280;GO:0098703;	K04972	-	P	0DJ5W;191IV;09XTU;12QQT;1B3V5;KOG3676;0UK6Y;1CTXT;0V8RE	transient receptor potential cation channel, subfamily V, member 3 [Source:RGD Symbol;Acc:1564531]	497948	E9PU00
ENSRNOG00000048831	291.383	184.276	398.489	2.16245	1.11267	0.00312759	0.137801	20	28815039	28819505	+	4467	Sowahc	GO:0005515;	-	-	S;E	0UQ9Q;KOG0504;1CS56;0DHF4;194VI;13JZ2;09UAA;0V742;1AU99	sosondowah ankyrin repeat domain family member C [Source:RGD Symbol;Acc:1595666]	503306	M0R7U6
ENSRNOG00000010971	811.859	514.993	1108.73	2.1529	1.10628	0.027512	0.389272	2	45454782	45480798	-	4394	Snx18	GO:0000278;GO:0000278;GO:0000281;GO:0000281;GO:0005515;GO:0005546;GO:0005546;GO:0005546;GO:0005546;GO:0006897;GO:0006897;GO:0015031;GO:0015031;GO:0015031;GO:0016020;GO:0016197;GO:0016197;GO:0030136;GO:0030136;GO:0030426;GO:0030659;GO:0031234;GO:0031234;GO:0031410;GO:0031410;GO:0031410;GO:0035091;GO:0035091;GO:0035091;GO:0036089;GO:0036089;GO:0043025;GO:0043547;GO:0043547;GO:0070062;GO:0070062;	K17923	-	U	18V65;0V6AB;KOG2528;0DGJI;0UIDK;09VB1;12QGZ;1CR9D;1ATXN	sorting nexin 18 [Source:RGD Symbol;Acc:1310367]	310097	D3ZZ38
ENSRNOG00000017914	325.254	206.327	444.182	2.15281	1.10622	0.00714665	0.20541	1	170317113	170318935	-	1282	Cavin3	GO:0001558;GO:0005080;GO:0005080;GO:0005080;GO:0005737;GO:0005737;GO:0005737;GO:0005737;GO:0005829;GO:0005901;GO:0005901;GO:0005901;GO:0005901;GO:0005901;GO:0005901;GO:0005901;GO:0016020;GO:0030866;GO:0030866;GO:0032922;GO:0032922;GO:0032922;GO:0032991;GO:0032991;GO:0048511;GO:0051898;GO:0051898;GO:0070374;GO:0070374;GO:1901003;GO:1901003;	-	-	T	0IVVG;1CUPN;0UNRJ;18Z6R;1AY82;09YFY;0DJW9;13NYT;0V9DT	caveolae associated protein 3 [Source:RGD Symbol;Acc:628755]	85332	Q9Z1H9
ENSRNOG00000017869	254.117	161.233	347.001	2.15217	1.10579	0.00619618	0.192166	19	54314865	54336640	+	2853	Irf8	GO:0000122;GO:0000122;GO:0000122;GO:0000976;GO:0000976;GO:0000977;GO:0000977;GO:0000978;GO:0000978;GO:0000978;GO:0000981;GO:0000981;GO:0001227;GO:0001227;GO:0002273;GO:0002273;GO:0002314;GO:0002316;GO:0002376;GO:0003677;GO:0003677;GO:0003677;GO:0003700;GO:0003700;GO:0005515;GO:0005515;GO:0005634;GO:0005634;GO:0005634;GO:0005634;GO:0005634;GO:0005654;GO:0005737;GO:0005737;GO:0006355;GO:0006355;GO:…	K10155	-	K	0IED8;1CQWX;0UH9B;09UXV;12P0C;0V5XS;0DG7D;18WNW;1B0TA	interferon regulatory factor 8 [Source:RGD Symbol;Acc:1312024]	292060	Q5NUI4
ENSRNOG00000013526	269.175	171.001	367.349	2.14823	1.10315	0.0174558	0.31676	4	148769096	148803988	-	2412	Rassf4	GO:0007165;	K09851	-	T	196YI;13MS5;0B19H;KOG4239;1BAEP;0WDUP;0V1SW;1DDHB;0E6IW	Ras association domain family member 4 [Source:RGD Symbol;Acc:1307785]	362423	Q566C5
ENSRNOG00000020925	270.164	171.767	368.561	2.1457	1.10145	0.00163886	0.098143	1	226996237	227002139	-	1347	Ccdc86	GO:0005634;GO:0005634;GO:0005634;GO:0005654;GO:0005694;GO:0005730;GO:0005730;	K14822	-	S	0VFSG;13W7I;1AS7H;KOG4538;0DSCT;1D1N8;0UFYK;18UHE;0A41T	coiled-coil domain containing 86 [Source:RGD Symbol;Acc:1359280]	293738	Q5XIB5
ENSRNOG00000011445	176.725	112.375	241.074	2.14527	1.10116	0.0201324	0.336556	5	148661070	148667746	+	561	Nkain1	GO:0005886;GO:0051117;	K22735	-	U	KOG4556;13QJS;0VBF1;1CX2G;0DN5Y;1AYU0;191E1;0A0IU;0UP8N	Sodium/potassium transporting ATPase interacting 1 [Source:RGD Symbol;Acc:1561205]	500557	-
ENSRNOG00000012721	225.427	143.397	307.457	2.14409	1.10037	0.0128904	0.278535	19	33928356	33991703	+	5077	Ednra	GO:0001569;GO:0001666;GO:0001701;GO:0004930;GO:0004930;GO:0004930;GO:0004962;GO:0004962;GO:0004962;GO:0005886;GO:0007165;GO:0007186;GO:0007186;GO:0007186;GO:0007193;GO:0007507;GO:0007585;GO:0008217;GO:0008217;GO:0010827;GO:0014032;GO:0014824;GO:0016020;GO:0016021;GO:0016021;GO:0016021;GO:0042310;GO:0042310;GO:0042310;GO:0042310;GO:0048484;GO:0048484;GO:0060322;GO:0086100;GO:0004930;GO:0004930;GO:…	K04197	-	T	KOG3656;12SX4;09Y9X;0V97C;18WAB;1CUGC;0UKEZ;1AVXQ;0DJPD	endothelin receptor type A [Source:RGD Symbol;Acc:2535]	24326	P26684;A0A0G2JSX5;A1Y2B8
ENSRNOG00000002610	1252.23	796.608	1707.85	2.1439	1.10024	0.00494855	0.172869	10	7041510	7055101	+	3027	Carhsp1	GO:0000177;GO:0000177;GO:0000177;GO:0000932;GO:0003676;GO:0003676;GO:0003723;GO:0003730;GO:0003730;GO:0003730;GO:0003730;GO:0005737;GO:0005737;GO:0005737;GO:0005829;GO:0005829;GO:0005829;GO:0043186;GO:0043186;GO:0043186;GO:0043488;GO:0043488;GO:0043488;GO:0043488;	-	-	J;K	1D360;0DTTV;0VHGT;0A6V3;0UV81;1B5IC;KOG3070;13R8D;192UW	calcium regulated heat stable protein 1 [Source:RGD Symbol;Acc:708415]	260416	Q9WU49
ENSRNOG00000024818	104.25	66.4483	142.052	2.13779	1.09612	0.0153681	0.2971	5	144160108	144161410	+	1077	Eva1b	GO:0016020;GO:0016021;	-	-	-	-	eva-1 homolog B [Source:RGD Symbol;Acc:1308876]	362597	B2RZB3
ENSRNOG00000011932	356.266	227.167	485.366	2.13661	1.09532	0.00815489	0.22193	1	126961389	126974453	+	1270	Snrpa1	GO:0000398;GO:0005515;GO:0005634;GO:0005654;GO:0005681;GO:0005686;GO:0007283;GO:0016604;GO:0016607;GO:0071005;GO:0071007;GO:0071013;GO:0000398;GO:0000398;GO:0000398;GO:0003674;GO:0005515;GO:0005575;GO:0005634;GO:0005681;GO:0005686;GO:0005686;GO:0007283;GO:0008150;GO:0030620;GO:0030620;GO:0071005;GO:0071007;GO:0071013;	K11092	-	A	09YIZ;KOG1644;1AYMJ;0V9GQ;18XA3;0UP2V;12R8Y;0DMW9;1CWRU	small nuclear ribonucleoprotein polypeptide A' [Source:RGD Symbol;Acc:2320494]	100361269	D3ZZR5
ENSRNOG00000001336	138.447	88.2847	188.609	2.13638	1.09517	0.00598544	0.188533	12	38981927	38995570	-	1122	Orai1	GO:0002115;GO:0002115;GO:0005262;GO:0005829;GO:0005886;GO:0005887;GO:0015279;GO:0016020;GO:0016323;GO:0032991;GO:0042802;GO:0044853;GO:0045121;GO:0045762;GO:0051924;GO:0051928;GO:0061180;GO:0070509;GO:0070588;	-	-	A	KOG4298	ORAI calcium release-activated calcium modulator 1 [Source:RGD Symbol;Acc:1311873]	-	-
ENSRNOG00000000137	53.9607	34.4667	73.4547	2.13118	1.09165	0.0336333	0.423147	17	28104589	28191436	-	1091	Ly86	GO:0006955;GO:0006955;GO:0031666;GO:0031666;	-	-	S	1B5CK;1D396;13Q42;0UV8I;0VHT3;0DTX2;0IWHW;0A6YY;193E6	lymphocyte antigen 86 [Source:RGD Symbol;Acc:1309936]	291359	D3ZAS0
ENSRNOG00000010756	421.868	269.677	574.06	2.12869	1.08997	0.00106848	0.0774966	10	56187020	56198449	+	2192	Tp53	GO:0000976;GO:0003677;GO:0003700;GO:0005515;GO:0005634;GO:0006355;GO:0006915;GO:0051262;GO:0000122;GO:0000976;GO:0000977;GO:0000978;GO:0001228;GO:0001756;GO:0001836;GO:0002309;GO:0002326;GO:0002360;GO:0002931;GO:0003677;GO:0003682;GO:0003700;GO:0003700;GO:0005515;GO:0005634;GO:0005634;GO:0005657;GO:0005737;GO:0005739;GO:0005759;GO:0005829;GO:0006302;GO:0006355;GO:0006355;GO:0006357;GO:0006606;GO:…	K04451	-	K;B	1AVUU;0UKCC;0VDT8;0DI05;1915J;0IITK;09X7G;1CSQW;13B4X	tumor protein p53 [Source:RGD Symbol;Acc:3889]	24842	P10361
ENSRNOG00000016037	115.174	73.6704	156.678	2.12675	1.08865	0.00687119	0.202411	3	156339004	156340913	-	1910	Mafb	GO:0000978;GO:0001228;GO:0003677;GO:0003677;GO:0003700;GO:0005634;GO:0005634;GO:0005667;GO:0006355;GO:0006355;GO:0006357;GO:0007379;GO:0007585;GO:0008134;GO:0021571;GO:0021572;GO:0021599;GO:0033077;GO:0035284;GO:0042472;GO:0043565;GO:0045647;GO:0045671;GO:0045893;GO:0045944;GO:0048538;	K09036	-	K	1B179;0DM6M;0VAJN;0URB0;1950H;KOG4196;13UZ2;09ZNW;1CW1U	MAF bZIP transcription factor B [Source:RGD Symbol;Acc:2982]	54264	P54842
ENSRNOG00000013813	115.247	73.7407	156.753	2.12574	1.08796	0.00784125	0.215961	1	261229347	261280536	+	1854	Ubtd1	GO:0005515;	-	-	O	KOG0013;0DHAA;194YR;09W15;0V6ZG;0UNUD;1CS09;12TRY;1ASSD	ubiquitin domain containing 1 [Source:RGD Symbol;Acc:1308172]	309373	Q68FV8
ENSRNOG00000012008	52.8178	33.8434	71.7922	2.12131	1.08495	0.032921	0.418233	2	189955836	189996029	+	939	S100a3	GO:0005509;GO:0005509;GO:0005794;GO:0005829;GO:0005886;GO:0008270;GO:0008270;GO:0046914;GO:0046914;GO:0005509;GO:0008270;GO:0046914;	K23760	-	S	0UVVV;193P3;0VJG8;0A8JP;1B67N;1D4DY;0J3DW;13WTZ;0DV3F	S100 calcium binding protein A3 [Source:RGD Symbol;Acc:620260]	114216	P62819
ENSRNOG00000014297	1249.25	801.151	1697.34	2.11863	1.08313	0.000626395	0.0600186	3	160872503	160891190	-	2488	Sdc4	GO:0001843;GO:0009986;GO:0010762;GO:0016020;GO:0042060;GO:0042130;GO:0042802;GO:0060122;GO:0070053;GO:1903543;GO:1903553;	K16338	-	W;T	13RBQ;0VDJG;0UKWC;1CZD7;1ATRY;0IXIG;192PV;0A2PM;0DQBB	syndecan 4 [Source:RGD Symbol;Acc:3650]	24771	P34901
ENSRNOG00000014479	960.453	615.957	1304.95	2.11857	1.08309	0.00260667	0.125874	2	207495055	207541645	-	4795	Cttnbp2nl	GO:0006470;GO:0006470;GO:0006470;GO:0006470;GO:0015629;GO:0015629;GO:0032410;GO:0032410;GO:0034763;GO:0034763;GO:0051721;GO:0051721;GO:0051721;	-	-	Z;S	0URCX;KOG1103;1B202;0DRAA;1D0FM;0A3PH;18Z1U;0VEIC;13N7J	CTTNBP2 N-terminal like [Source:RGD Symbol;Acc:1310822]	310760	D4A8X8
ENSRNOG00000007584	532.065	341.595	722.535	2.11518	1.08078	0.00554456	0.181766	3	111877853	111941841	-	3428	Ehd4	GO:0005509;GO:0005509;GO:0005515;GO:0005524;GO:0005525;GO:0005525;GO:0005768;GO:0005769;GO:0005783;GO:0005886;GO:0005886;GO:0006897;GO:0006907;GO:0010008;GO:0016020;GO:0016197;GO:0030100;GO:0030139;GO:0032456;GO:0032456;GO:0032456;GO:0032456;GO:0032456;GO:0043231;GO:0046872;GO:0048471;GO:0048471;GO:0048471;GO:0050731;GO:0051260;GO:0051260;GO:0055038;GO:0055038;GO:0055038;GO:0060271;GO:0071363;GO:…	K12477	-	T;U	1ASKS;0V6UU;1CTEH;0USGH;09XC5;12N3T;KOG1954;0DIPJ;18U9Z	EH-domain containing 4 [Source:RGD Symbol;Acc:628883]	192204	Q8R3Z7
ENSRNOG00000009358	343.121	220.378	465.863	2.11393	1.07992	0.0404167	0.463319	5	29663685	29682005	-	1946	Osgin2	GO:0007165;GO:0008083;GO:0030308;	-	-	T	1ASZE;0DHDJ;12QIZ;09W4G;0UHC4;0V72U;0IF6I;18YR8;1CS3T	oxidative stress induced growth inhibitor family member 2 [Source:RGD Symbol;Acc:1306323]	313085	-
ENSRNOG00000010775	247.215	159.003	335.427	2.10956	1.07694	0.00224624	0.115516	1	129766100	129780356	-	4287	Arrdc4	GO:0005768;GO:0005886;GO:0005886;GO:0015031;GO:0016567;GO:0043231;GO:0051443;GO:0140112;GO:1903561;GO:1990756;GO:0005737;GO:0005768;GO:0005768;GO:0005769;GO:0005886;GO:0005886;GO:0005886;GO:0015031;GO:0015031;GO:0015031;GO:0016020;GO:0016567;GO:0016567;GO:0031410;GO:0051443;GO:0140112;GO:0140112;GO:1903561;GO:1903561;GO:1990756;GO:1990756;GO:1990756;	-	-	C	KOG3780	arrestin domain containing 4 [Source:RGD Symbol;Acc:1311763]	293019	Q7TP90
ENSRNOG00000006859	2060.04	1325.55	2794.53	2.1082	1.07601	0.000641571	0.0611508	4	342302	350515	+	2420	Insig1	GO:0003674;GO:0005575;GO:0005783;GO:0005783;GO:0005783;GO:0005789;GO:0006629;GO:0006641;GO:0006695;GO:0006695;GO:0006991;GO:0008142;GO:0008142;GO:0008202;GO:0008203;GO:0008203;GO:0008203;GO:0008203;GO:0008289;GO:0010894;GO:0016020;GO:0016021;GO:0016126;GO:0016126;GO:0032355;GO:0032869;GO:0032869;GO:0032933;GO:0032933;GO:0032937;GO:0032937;GO:0033993;GO:0036315;GO:0036316;GO:0036316;GO:0042472;GO:…	-	-	T	KOG4363;1AYMX;0DHAY;09W1V;1CQV1;12UD5;0V703;0UJE9;191JJ	insulin induced gene 1 [Source:RGD Symbol;Acc:708457]	64194	Q08755
ENSRNOG00000006921	52.8565	34.0836	71.6293	2.10158	1.07147	0.0280759	0.390467	3	153263692	153321352	-	3000	Rbl1	GO:0000122;GO:0005634;GO:0005634;GO:0005654;GO:0005667;GO:0005667;GO:0006357;GO:0008134;GO:0010629;GO:0043550;GO:0051302;GO:0051726;GO:1990841;GO:2000773;	K04681	-	D	KOG1010;0V7EN;12TRG	RB transcriptional corepressor like 1 [Source:RGD Symbol;Acc:1595511]	680111	D3ZS28
ENSRNOG00000031475	636.873	411.008	862.737	2.09907	1.06975	0.00355112	0.146595	5	148257642	148311645	+	5241	Col16a1	GO:0005178;GO:0007155;GO:0033622;GO:0033627;GO:0051894;GO:0071230;	K24339	-	W	1CRV0;09VWM;18WU2;KOG3544;12SNN;1AW9W;0V6V5;0DH4R;0UJ6A	collagen type XVI alpha 1 chain [Source:RGD Symbol;Acc:1310982]	366474	-
ENSRNOG00000024159	275.687	177.923	373.451	2.09895	1.06967	0.00263117	0.126627	13	89601896	89606326	-	631	Fcer1g	GO:0001798;GO:0001805;GO:0001812;GO:0002283;GO:0002283;GO:0002292;GO:0002292;GO:0002376;GO:0002431;GO:0002431;GO:0002554;GO:0004888;GO:0004888;GO:0005515;GO:0005886;GO:0005886;GO:0005887;GO:0005887;GO:0006911;GO:0007165;GO:0007166;GO:0007166;GO:0007166;GO:0007229;GO:0009897;GO:0009897;GO:0009986;GO:0009986;GO:0010543;GO:0010543;GO:0016020;GO:0016020;GO:0016020;GO:0016021;GO:0016064;GO:0016064;GO:…	K07983	-	W	0J5TQ;0VMEP;193ZN;13YQF;1B6YF;1D4XA;0DVM0;0UWCJ;0AAGG	Fc fragment of IgE receptor Ig [Source:RGD Symbol;Acc:2599]	25441	P20411;B1H251
ENSRNOG00000043099	1064.69	687.317	1442.06	2.0981	1.06908	0.000780769	0.0683361	20	32213148	32232632	-	4380	Ddx21	GO:0003676;GO:0003723;GO:0004386;GO:0005524;	K16911	EC:3.6.4.13	A	0V7JV;1CSMF;0DHWV;KOG0331;13I3P;18ZE4;09WM6;0UFEA;1AVTD	DExD-box helicase 21 [Source:RGD Symbol;Acc:1307306]	317399	Q3B8Q1
ENSRNOG00000015030	1073.72	693.514	1453.92	2.09645	1.06795	0.00103855	0.0770085	1	241945841	242083484	-	4672	Tjp2	GO:0005515;GO:0005634;GO:0005886;GO:0005886;GO:0005886;GO:0005911;GO:0005923;GO:0005923;GO:0005923;GO:0005923;GO:0005923;GO:0008022;GO:0010033;GO:0016020;GO:0019904;GO:0030054;GO:0030674;GO:0034109;GO:0044291;GO:0045216;GO:0050839;GO:0050892;GO:0070160;GO:0071847;GO:0090557;GO:0090557;GO:0090559;GO:0098609;GO:0150105;GO:1905605;GO:1905605;GO:1990782;GO:2001205;	K06098	-	T	18TVU;1CZ0V;0URM8;0DF65;12RKK;09TVQ;KOG3580;1B1J1;0V4UW	tight junction protein 2 [Source:RGD Symbol;Acc:619807]	115769	Q3ZB99
ENSRNOG00000031244	258.773	167.292	350.255	2.09367	1.06603	0.00248977	0.122836	18	4371051	4371899	-	849	LOC108349606	GO:0042254;GO:1990904;	-	-	J	KOG3166	60S ribosomal protein L7a-like [Source:RGD Symbol;Acc:11408721]	-	-
ENSRNOG00000060614	342	221.107	462.894	2.09353	1.06594	0.0025059	0.123297	6	48866601	48980340	+	4562	Pxdn	GO:0004601;GO:0004601;GO:0004601;GO:0004601;GO:0005201;GO:0005515;GO:0005576;GO:0005615;GO:0005783;GO:0006979;GO:0006979;GO:0019806;GO:0020037;GO:0020037;GO:0020037;GO:0030198;GO:0030199;GO:0042744;GO:0055114;GO:0062023;GO:0098869;GO:0004601;GO:0004601;GO:0005201;GO:0005515;GO:0005615;GO:0005783;GO:0006979;GO:0019806;GO:0020037;GO:0020037;GO:0030198;GO:0030198;GO:0030199;GO:0042744;GO:0055114;GO:…	K19511	EC:1.11.1.7	-	-	peroxidasin [Source:RGD Symbol;Acc:1560694]	554172	-
ENSRNOG00000015941	255.255	165.033	345.477	2.09339	1.06584	0.00248061	0.122716	10	88326080	88338207	+	2929	Fkbp10	GO:0000413;GO:0001701;GO:0003755;GO:0003755;GO:0003755;GO:0003755;GO:0003755;GO:0005509;GO:0005509;GO:0005528;GO:0005758;GO:0005783;GO:0005783;GO:0016020;GO:0016853;GO:0017185;GO:0018208;GO:0030199;GO:0035909;GO:0042060;GO:0085029;GO:0000413;GO:0001701;GO:0001701;GO:0003755;GO:0003755;GO:0003755;GO:0003755;GO:0003755;GO:0003755;GO:0005509;GO:0005509;GO:0005528;GO:0005528;GO:0005758;GO:0005758;GO:…	K09575	EC:5.2.1.8	O	0A03F;0DFD1;KOG0549;0VAZP;12U6W;1AX1P;18YBU;0UMJA;1CWIP	FKBP prolyl isomerase 10 [Source:RGD Symbol;Acc:1549751]	360627	Q5U2V1
ENSRNOG00000009850	1034.7	669.076	1400.33	2.09293	1.06552	0.0116113	0.263181	8	36264750	36314811	-	2059	St3gal4	GO:0003836;GO:0003836;GO:0004513;GO:0006486;GO:0006486;GO:0006486;GO:0008118;GO:0008118;GO:0008373;GO:0009101;GO:0009247;GO:0009312;GO:0030194;GO:0030259;GO:0047288;GO:0050890;GO:0097503;GO:1903238;GO:1903238;GO:1990743;	K03494	EC:2.4.99.4	G	0URGU;0V5ST;1CQSC;09UT8;18TFA;12S5S;KOG2692;1AYFH;0DG2V	ST3 beta-galactoside alpha-2,3-sialyltransferase 4 [Source:RGD Symbol;Acc:1303068]	363040	P61131
ENSRNOG00000021437	219.493	142.157	296.829	2.08804	1.06215	0.0197557	0.333012	5	155812105	155885829	+	7575	AABR07073181.1	GO:0005515;GO:0005576;GO:0005604;GO:0005604;GO:0005604;GO:0009887;GO:0009888;GO:0016020;	-	-	-	-	-	-	-
ENSRNOG00000036603	50.3214	32.6086	68.0343	2.08639	1.06101	0.0320188	0.412374	1	252914684	252922486	-	2245	Ifit1bl	GO:0005515;GO:0005737;GO:0009615;GO:0050688;GO:0071357;GO:0071360;	K14217	-	-	-	interferon-induced protein with tetratricopeptide repeats 1B-like [Source:RGD Symbol;Acc:1304872]	294090	-
ENSRNOG00000008696	105.467	68.351	142.582	2.08603	1.06076	0.0105651	0.255767	7	26472288	26478189	-	1189	RGD1563365	-	-	-	S;L	0VHIM;0UV7J;0DR4J;0J22I;1B574;0A76F;1D22G;193B4;13V04	similar to DNA segment, Chr 10, Wayne State University 102, expressed [Source:RGD Symbol;Acc:1563365]	299700	F1M6B3
ENSRNOG00000005807	58.6399	38.0058	79.274	2.08584	1.06063	0.0298396	0.397971	13	51958834	51972777	+	4413	Ptpn7	GO:0004725;GO:0005737;GO:0005829;GO:0006470;GO:0006470;GO:0009898;GO:0015630;GO:0016311;GO:0016791;GO:0072686;	K18019	EC:3.1.3.48	T	09YTV;KOG0789;13DM6;1B2GH;0V9RR;1CV2B;0UM2K;18YW9;0DK8H	protein tyrosine phosphatase, non-receptor type 7 [Source:RGD Symbol;Acc:708516]	246781	P49445
ENSRNOG00000012172	110.671	71.7338	149.608	2.0856	1.06046	0.0212441	0.344827	3	79918969	79938301	+	1978	Spi1	GO:0000122;GO:0000122;GO:0000785;GO:0000785;GO:0000976;GO:0000978;GO:0000978;GO:0000981;GO:0000987;GO:0000987;GO:0001085;GO:0001085;GO:0001216;GO:0001217;GO:0001227;GO:0001228;GO:0001944;GO:0002314;GO:0002316;GO:0002320;GO:0002327;GO:0002357;GO:0002572;GO:0002573;GO:0002573;GO:0003677;GO:0003682;GO:0003700;GO:0003700;GO:0003700;GO:0005634;GO:0005634;GO:0005654;GO:0005667;GO:0006355;GO:0006355;GO:…	K09438	-	K;B	09VH2;0UHQJ;0DGRT;KOG3805;1CRFU;1ATAY;12SKS;0V6GB;1908K	Spi-1 proto-oncogene [Source:RGD Symbol;Acc:1359607]	366126	Q6BDS1
ENSRNOG00000019556	2412.09	1565.24	3258.94	2.08207	1.05802	0.0412109	0.46657	4	157977162	158010166	-	1221	Cd9	GO:0005178;GO:0005178;GO:0005178;GO:0005515;GO:0005576;GO:0005886;GO:0005886;GO:0005886;GO:0005887;GO:0007155;GO:0007155;GO:0007155;GO:0007338;GO:0007338;GO:0007338;GO:0007342;GO:0007342;GO:0007342;GO:0007342;GO:0007420;GO:0008285;GO:0008285;GO:0008347;GO:0008347;GO:0009414;GO:0009897;GO:0009897;GO:0009986;GO:0014003;GO:0014905;GO:0014905;GO:0014905;GO:0016020;GO:0016020;GO:0016020;GO:0016021;GO:…	K06460	-	S;T;G	1CRZV;0DH9X;12PMD;09W0P;1B2C7;0V6Z3;0UJC9;KOG3882;191JP	CD9 molecule [Source:RGD Symbol;Acc:2318]	24936	P40241;B1WBM0
ENSRNOG00000012439	184.027	119.532	248.522	2.07914	1.05598	0.00430877	0.160084	4	153442218	153465203	-	1992	Bid	GO:0001836;GO:0001836;GO:0001836;GO:0002931;GO:0005515;GO:0005737;GO:0005737;GO:0005737;GO:0005737;GO:0005739;GO:0005739;GO:0005739;GO:0005739;GO:0005741;GO:0005741;GO:0005741;GO:0005829;GO:0005829;GO:0005829;GO:0005829;GO:0005829;GO:0006626;GO:0006626;GO:0006915;GO:0006919;GO:0006919;GO:0006919;GO:0006919;GO:0007420;GO:0008637;GO:0008637;GO:0010918;GO:0010918;GO:0016020;GO:0016020;GO:0016020;GO:…	K04726	-	T;U	0DT0Q;1D2MG;1B5WE;0VFYP;0UU1X;1938H;0A64C;13PQP;0IVZ7	BH3 interacting domain death agonist [Source:RGD Symbol;Acc:620160]	64625	Q9JLT6;A8ASI9
ENSRNOG00000001928	948.35	616.082	1280.62	2.07865	1.05565	0.0272525	0.387073	11	77463954	77593207	-	3395	Il1rap	GO:0002114;GO:0004908;GO:0004908;GO:0004908;GO:0005515;GO:0007165;GO:0007165;GO:0016020;GO:0016021;GO:0019221;GO:0032736;GO:0032753;GO:0032754;GO:0032755;GO:0038172;GO:0051092;GO:0051965;GO:0098978;GO:0099151;GO:0099545;GO:0099560;GO:1905606;GO:0004908;GO:0004908;GO:0005515;GO:0007165;GO:0007165;GO:0016020;GO:0016021;GO:0019221;	K04723	-	T	0IEPH;0DR84;1B1CJ;0UJ4N;18UFS;1CVG8;13JI1;0A3M9;0V8R0	interleukin 1 receptor accessory protein [Source:RGD Symbol;Acc:2893]	25466	Q63621
ENSRNOG00000018384	72.5283	47.143	97.9135	2.07694	1.05446	0.0227774	0.356852	1	205956342	206282575	-	2996	Adam12	GO:0004222;GO:0006508;GO:0008237;	K06835	EC:3.4.24.-	O	0UFT5;0DIV2;12RXZ;1CTKE;1ARN3;18WWS;09VEK;KOG3607;0V6DS	ADAM metallopeptidase domain 12 [Source:RGD Symbol;Acc:1583652]	679837	-
ENSRNOG00000018659	455.795	296.412	615.177	2.07541	1.0534	0.00767326	0.213596	2	210522375	210550560	-	4048	Csf1	GO:0001503;GO:0001954;GO:0002158;GO:0002376;GO:0002931;GO:0003006;GO:0005125;GO:0005125;GO:0005125;GO:0005125;GO:0005125;GO:0005157;GO:0005576;GO:0005615;GO:0005615;GO:0005615;GO:0005886;GO:0006954;GO:0007169;GO:0008083;GO:0008083;GO:0008083;GO:0008083;GO:0008283;GO:0008284;GO:0010628;GO:0010744;GO:0010759;GO:0016020;GO:0016021;GO:0016021;GO:0016021;GO:0030225;GO:0030278;GO:0030316;GO:0030316;GO:…	K05453	-	W;T	0II8R;13FAW;0UTJ9;1CZBK;0A2N7;0DQ9T;1B4AV;190U3;0V4DB	colony stimulating factor 1 [Source:RGD Symbol;Acc:621063]	78965	Q6GMN4
ENSRNOG00000000158	1248.31	812.338	1684.28	2.07337	1.05198	0.00114092	0.0805053	18	40701984	40716686	-	1516	Cdo1	GO:0005506;GO:0005506;GO:0005829;GO:0005829;GO:0006534;GO:0007595;GO:0008198;GO:0008198;GO:0010243;GO:0016491;GO:0016702;GO:0016702;GO:0016702;GO:0017172;GO:0017172;GO:0017172;GO:0017172;GO:0019448;GO:0019448;GO:0033762;GO:0042412;GO:0043200;GO:0045471;GO:0046439;GO:0046872;GO:0051213;GO:0051384;GO:0051591;GO:0055114;	K00456	EC:1.13.11.20	E	0VBPB;18S28;0A0SU;0DNE3;1CXBB;12T2Y;1AXHJ;0UJAU;KOG4064	cysteine dioxygenase type 1 [Source:RGD Symbol;Acc:69262]	81718	P21816
ENSRNOG00000045649	680.147	442.755	917.539	2.07234	1.05126	0.00737741	0.208898	2	8732932	8743069	+	1678	Arrdc3	GO:0001659;GO:0001659;GO:0005737;GO:0005737;GO:0005764;GO:0005768;GO:0005768;GO:0005768;GO:0005768;GO:0005769;GO:0005886;GO:0005886;GO:0005886;GO:0005886;GO:0015031;GO:0016020;GO:0031651;GO:0031651;GO:0031699;GO:0031699;GO:0043588;GO:0043588;GO:0051443;GO:0051443;GO:0060613;GO:0060613;GO:0071878;GO:0071878;GO:0090327;GO:0090327;GO:0120163;GO:0120163;GO:0120163;	-	-	S;T;C	KOG3780;13HFT;1952J;1CQ52;09Z9K;0DFFA;0UR8U;0VA6T;1B08W	arrestin domain containing 3 [Source:RGD Symbol;Acc:1359478]	309945	Q6TXF1
ENSRNOG00000008409	116.3	75.9257	156.675	2.06353	1.04511	0.0348774	0.42983	7	18440742	18491448	+	3817	Myo1f	GO:0000146;GO:0000166;GO:0002446;GO:0003774;GO:0003774;GO:0003774;GO:0003779;GO:0005515;GO:0005516;GO:0005524;GO:0005524;GO:0005524;GO:0005737;GO:0005829;GO:0005886;GO:0005902;GO:0007015;GO:0007162;GO:0009617;GO:0015629;GO:0016459;GO:0016459;GO:0016459;GO:0030050;GO:0030335;GO:0030864;GO:0030898;GO:0031941;GO:0031982;GO:0032956;GO:0043312;GO:0045088;GO:0050830;GO:0051015;	K10356	-	Z	0V43A;0DEFT;0UFDH;09T4J;1AX0E;18SJQ;KOG0164;12N1J;1CP5H	myosin IF [Source:RGD Symbol;Acc:1309750]	314654	D4A7X9
ENSRNOG00000018782	87.4725	57.1193	117.826	2.0628	1.0446	0.0152767	0.29618	17	42302540	42310783	+	1178	Gmnn	GO:0003682;GO:0003682;GO:0003714;GO:0003714;GO:0005634;GO:0005634;GO:0005634;GO:0005634;GO:0005634;GO:0005654;GO:0005737;GO:0005737;GO:0005829;GO:0006275;GO:0006275;GO:0006275;GO:0006275;GO:0008156;GO:0008156;GO:0008156;GO:0008156;GO:0008156;GO:0008156;GO:0009887;GO:0009887;GO:0035563;GO:0035563;GO:0042826;GO:0042826;GO:0045786;GO:0045786;GO:0045786;GO:0045786;GO:0045786;GO:0045786;GO:0045892;GO:…	K10749	-	K;L	0IG0B;18Z37;132AU;0A557;0VG0G;1AZG0;0DSCM;1D1N2;0UPHM	geminin, DNA replication inhibitor [Source:RGD Symbol;Acc:1308137]	291137	D3ZWJ0
ENSRNOG00000030888	506.29	330.689	681.892	2.06203	1.04407	0.00260479	0.125874	1	220992770	221003249	+	2443	Rela	GO:0000122;GO:0000122;GO:0000122;GO:0000785;GO:0000785;GO:0000785;GO:0000785;GO:0000976;GO:0000976;GO:0000977;GO:0000977;GO:0000977;GO:0000978;GO:0000978;GO:0000978;GO:0000978;GO:0000978;GO:0000979;GO:0000979;GO:0000981;GO:0000981;GO:0000981;GO:0000981;GO:0001225;GO:0001225;GO:0001227;GO:0001227;GO:0001227;GO:0001228;GO:0001228;GO:0001228;GO:0001889;GO:0001889;GO:0001942;GO:0001942;GO:0003677;GO:…	K04735	-	K	0IG8F;1CPFA;18YPB;09TEG;13E12;1AXQX;0DERH;0V4DN;0UFH7	RELA proto-oncogene, NF-kB subunit [Source:RGD Symbol;Acc:727889]	309165	Q7TQN4
ENSRNOG00000009946	1137.85	743.27	1532.44	2.06175	1.04387	0.0039062	0.154592	8	22750336	22774903	+	4725	Ldlr	GO:0001540;GO:0002020;GO:0005041;GO:0005041;GO:0005509;GO:0005509;GO:0005515;GO:0005764;GO:0005764;GO:0005768;GO:0005769;GO:0005769;GO:0005770;GO:0005770;GO:0005794;GO:0005886;GO:0005905;GO:0006629;GO:0006897;GO:0006898;GO:0006909;GO:0007616;GO:0007616;GO:0008203;GO:0009897;GO:0009986;GO:0009986;GO:0010628;GO:0010629;GO:0010867;GO:0010899;GO:0015914;GO:0016020;GO:0016021;GO:0016323;GO:0030169;GO:…	K12473	-	T	1DCIN;196RX;0B01R;0WCI5;0E5IS;14T6W;0V10Y;1B9XX;0KD0U	low density lipoprotein receptor [Source:RGD Symbol;Acc:2998]	300438	P35952
ENSRNOG00000012160	125.19	81.8608	168.518	2.0586	1.04166	0.0177173	0.318673	17	12614311	12669573	-	5316	Syk	GO:0000166;GO:0000187;GO:0001784;GO:0001819;GO:0001820;GO:0001945;GO:0002092;GO:0002250;GO:0002281;GO:0002283;GO:0002366;GO:0002376;GO:0002554;GO:0004672;GO:0004672;GO:0004672;GO:0004674;GO:0004713;GO:0004713;GO:0004713;GO:0004713;GO:0004714;GO:0004715;GO:0004715;GO:0004715;GO:0004715;GO:0004715;GO:0005178;GO:0005524;GO:0005524;GO:0005524;GO:0005524;GO:0005634;GO:0005737;GO:0005737;GO:0005737;GO:…	K05855	EC:2.7.10.2	T	0IH0T;18VQR;13I3G;0UJB4;0VDHS;1AX5P;0DH8V;0A2MV;1CRYW	spleen associated tyrosine kinase [Source:RGD Symbol;Acc:3796]	25155	Q64725
ENSRNOG00000061146	125.791	82.2551	169.326	2.05855	1.04163	0.0150498	0.295217	2	235250453	235257731	-	1580	Gar1	GO:0000454;GO:0000454;GO:0000781;GO:0000781;GO:0001522;GO:0001522;GO:0001650;GO:0003723;GO:0003723;GO:0003723;GO:0005515;GO:0005634;GO:0005654;GO:0005697;GO:0005697;GO:0005697;GO:0005730;GO:0006364;GO:0007004;GO:0007004;GO:0007004;GO:0015030;GO:0031429;GO:0031429;GO:0031429;GO:0034513;GO:0034513;GO:0034513;GO:0042254;GO:0042254;GO:0042254;GO:0070034;GO:0070034;GO:0090661;GO:0090661;GO:0001522;GO:…	K11128	-	-	-	GAR1 ribonucleoprotein [Source:RGD Symbol;Acc:1563995]	499709	Q6AYA1
ENSRNOG00000011503	227.714	148.93	306.498	2.058	1.04124	0.0146224	0.292208	5	60971257	61077627	-	1506	Shb	GO:0001568;GO:0001568;GO:0001784;GO:0001784;GO:0006469;GO:0006469;GO:0007165;GO:0007165;GO:0030097;GO:0030097;GO:0042100;GO:0042100;GO:0045624;GO:0045624;GO:0045931;GO:0045931;GO:0048514;GO:0048514;GO:0050852;GO:0050852;GO:0071425;GO:0071425;GO:1900194;GO:1900194;	K23697	-	S;T	0A033;0DG9N;18YEK;1CQZ1;12SZD;0V5CC;0UHR7;0IGWI;1ATBK	SH2 domain containing adaptor protein B [Source:RGD Symbol;Acc:1565350]	362513	D3ZN31
ENSRNOG00000039315	105.993	69.3961	142.59	2.05472	1.03894	0.0118625	0.265304	3	11813575	11820549	-	1706	Cfap157	GO:0005737;GO:0005829;GO:0005856;GO:0005886;GO:0005929;GO:0005929;GO:0005929;GO:0007283;GO:0007288;GO:0007288;GO:0007288;GO:0007288;GO:0008017;GO:0008017;GO:0008017;GO:0008017;GO:0030154;GO:0036064;GO:0036064;GO:0036064;GO:0036064;GO:0042995;GO:0043231;	-	-	S	0UGQ9;13JI8;18WHY;0DFEJ;1B3DQ;1CQ4B;0V546;0IE36;09U52	cilia and flagella associated protein 157 [Source:RGD Symbol;Acc:1560002]	499781	Q4V7B0
ENSRNOG00000014504	255.455	167.336	343.575	2.0532	1.03787	0.00725857	0.206699	9	46962288	47036670	+	3951	Il1r1	GO:0004908;GO:0004908;GO:0004909;GO:0004909;GO:0005515;GO:0007165;GO:0007165;GO:0016020;GO:0016021;GO:0019221;GO:0070498;GO:0002020;GO:0004908;GO:0004908;GO:0004908;GO:0004908;GO:0004909;GO:0004909;GO:0005161;GO:0005515;GO:0007165;GO:0007165;GO:0009897;GO:0009986;GO:0016020;GO:0016020;GO:0016021;GO:0019221;GO:0019966;GO:0032729;GO:0050727;GO:0070498;GO:0070498;GO:0070555;GO:2000391;GO:2000556;GO:…	K04386	-	W;T	1ASFK;0UGRE;0IQBC;18TBI;13MG9;1CQ57;09U5U;0DFFE;0V54U	interleukin 1 receptor type 1 [Source:RGD Symbol;Acc:2892]	25663	Q05KR1
ENSRNOG00000002440	381.507	250.059	512.955	2.05134	1.03656	0.00241047	0.120557	13	35494721	35511020	-	2059	Ralb	GO:0000166;GO:0001934;GO:0003924;GO:0003924;GO:0003924;GO:0003924;GO:0003925;GO:0005525;GO:0005525;GO:0005525;GO:0005525;GO:0005886;GO:0005886;GO:0005886;GO:0007165;GO:0007165;GO:0007265;GO:0007265;GO:0009267;GO:0016020;GO:0016020;GO:0019003;GO:0030496;GO:0031625;GO:0032091;GO:0032092;GO:0051117;GO:0071360;GO:0071902;GO:2000786;	K07835	-	J	KOG0395	RAS like proto-oncogene B [Source:RGD Symbol;Acc:619852]	116546	P36860
ENSRNOG00000036689	3102.05	2035.1	4169	2.04855	1.0346	0.00183903	0.104951	10	109736458	109747987	-	2489	P4hb	GO:0003756;GO:0003756;GO:0003779;GO:0004656;GO:0005178;GO:0005178;GO:0005783;GO:0005783;GO:0005793;GO:0005829;GO:0005856;GO:0009897;GO:0009897;GO:0015037;GO:0016222;GO:0016972;GO:0018401;GO:0030027;GO:0032991;GO:0034663;GO:0034975;GO:0034976;GO:0045785;GO:0046598;GO:0046982;GO:0071456;GO:0098761;GO:1900026;GO:1902175;	K09580	EC:5.3.4.1	O	18VCD;09UNI;0DJ22;0UPA4;KOG0190;1CTTN;1B4V7;0V5N3;12P44	prolyl 4-hydroxylase subunit beta [Source:RGD Symbol;Acc:3244]	25506	P04785
ENSRNOG00000001229	397.55	260.874	534.226	2.04783	1.0341	0.0023124	0.117919	20	12225202	12332858	+	5007	Col18a1	GO:0001525;GO:0001525;GO:0001886;GO:0001886;GO:0003674;GO:0005201;GO:0005581;GO:0005604;GO:0005615;GO:0005615;GO:0008284;GO:0030198;GO:0030198;GO:0030335;GO:0030938;GO:0031012;GO:0042493;GO:0051599;GO:2000353;	K06823	-	W	190Y6;09X6K;13HQD;1B2RC;0V854;0DIHW;KOG3546;0UQUR;1CPIV	collagen type XVIII alpha 1 chain [Source:RGD Symbol;Acc:70936]	85251	F1LR02
ENSRNOG00000024207	194.259	127.554	260.964	2.04591	1.03274	0.00521536	0.177036	14	2018500	2032593	-	4385	Fgfrl1	GO:0000139;GO:0001501;GO:0001501;GO:0003179;GO:0003179;GO:0005007;GO:0005007;GO:0005007;GO:0005007;GO:0005794;GO:0005794;GO:0005794;GO:0005886;GO:0005886;GO:0005886;GO:0005886;GO:0005886;GO:0008201;GO:0008201;GO:0008285;GO:0008285;GO:0008543;GO:0016020;GO:0016021;GO:0017134;GO:0017134;GO:0017134;GO:0030133;GO:0030133;GO:0030658;GO:0031410;GO:0042802;GO:0042802;GO:0044291;GO:0044291;GO:0060412;GO:…	-	-	T	0A3G3;KOG0200;0US2A;13HBG;1911I;0DR3B;0VEB2;1B4AZ;1CYBE	fibroblast growth factor receptor-like 1 [Source:RGD Symbol;Acc:735156]	360903	Q7TQM3
ENSRNOG00000014294	159.435	104.761	214.11	2.04381	1.03126	0.0054501	0.179745	4	157239142	157263890	-	2353	Ptpn6	GO:0001784;GO:0001784;GO:0002244;GO:0002924;GO:0004721;GO:0004725;GO:0004725;GO:0004725;GO:0004725;GO:0004725;GO:0004725;GO:0005001;GO:0005634;GO:0005654;GO:0005730;GO:0005737;GO:0005737;GO:0005911;GO:0006470;GO:0006470;GO:0006470;GO:0006470;GO:0008284;GO:0014068;GO:0016311;GO:0016311;GO:0016787;GO:0016791;GO:0016791;GO:0017124;GO:0018108;GO:0019901;GO:0030154;GO:0030220;GO:0032715;GO:0032720;GO:…	K05697	EC:3.1.3.48	T	0V6WW;18S1Y;0DH76;KOG0790;1AUIG;1CRXA;09VYG;132K8;0UPD5	protein tyrosine phosphatase, non-receptor type 6 [Source:RGD Symbol;Acc:620660]	116689	P81718;Q499N7
ENSRNOG00000050453	69.0465	45.3876	92.7054	2.04253	1.03035	0.0284595	0.391209	1	86873253	86888958	+	705	AABR07002848.1	GO:0005515;GO:0005737;GO:0006516;GO:0016567;GO:0019005;GO:0030433;GO:0031146;GO:0061630;	-	-	-	-	-	-	-
ENSRNOG00000001277	404.901	266.204	543.599	2.04204	1.03001	0.0289422	0.393497	12	16923990	16934706	-	2645	Mafk	GO:0000122;GO:0000122;GO:0000976;GO:0000976;GO:0000976;GO:0000978;GO:0000981;GO:0001221;GO:0001227;GO:0001227;GO:0003677;GO:0003677;GO:0003677;GO:0003677;GO:0003677;GO:0003700;GO:0003700;GO:0003700;GO:0003700;GO:0005634;GO:0005634;GO:0005634;GO:0005634;GO:0005654;GO:0006355;GO:0006355;GO:0006355;GO:0006355;GO:0006357;GO:0007399;GO:0043565;GO:0043565;GO:0043565;GO:0071535;	K09037	-	K	0B5Q7;0WICE;0E921;1DFY6;0ISHX;13F42	MAF bZIP transcription factor K [Source:RGD Symbol;Acc:628633]	246760	Q6IRI7
ENSRNOG00000015491	318.206	209.364	427.048	2.03974	1.02838	0.0029203	0.132579	1	247228061	247305693	+	2492	Rcl1	GO:0000447;GO:0000479;GO:0000480;GO:0003674;GO:0003824;GO:0003824;GO:0004521;GO:0005575;GO:0005634;GO:0005730;GO:0005730;GO:0005730;GO:0005730;GO:0005730;GO:0006396;GO:0006396;GO:0008150;GO:0042254;GO:0042254;GO:0042254;GO:0000447;GO:0000479;GO:0000480;GO:0003674;GO:0003824;GO:0003824;GO:0004521;GO:0005575;GO:0005634;GO:0005730;GO:0005730;GO:0005730;GO:0005730;GO:0005730;GO:0006396;GO:0006396;GO:…	K11108	-	A	KOG3980	RNA terminal phosphate cyclase-like 1 [Source:RGD Symbol;Acc:1305320]	309301	A0A0G2QBZ9
ENSRNOG00000012698	671.537	442.441	900.633	2.0356	1.02545	0.00886308	0.2349	1	127010588	127071570	+	3760	Chsy1	GO:0002063;GO:0002063;GO:0003674;GO:0005575;GO:0005576;GO:0005576;GO:0005794;GO:0008376;GO:0008376;GO:0008376;GO:0009954;GO:0009954;GO:0016020;GO:0016021;GO:0016740;GO:0016757;GO:0016757;GO:0030206;GO:0030206;GO:0030206;GO:0030206;GO:0030279;GO:0030279;GO:0031667;GO:0032580;GO:0032580;GO:0032580;GO:0045880;GO:0045880;GO:0047238;GO:0047238;GO:0047238;GO:0050510;GO:0050510;GO:0051216;GO:0051216;GO:…	K13499	-	G	09YA9;12R1H;0V97R;18S7B;1AXGC;1CUGQ;0UMZY;KOG3588;0DJPT	chondroitin sulfate synthase 1 [Source:RGD Symbol;Acc:1311904]	292999	D3ZRM3
ENSRNOG00000016050	1849.99	1219.04	2480.94	2.03516	1.02514	0.00101223	0.0758692	16	71266248	71319449	-	3389	Fgfr1	GO:0000166;GO:0001837;GO:0004672;GO:0004672;GO:0004713;GO:0004713;GO:0004713;GO:0004713;GO:0004714;GO:0004714;GO:0005007;GO:0005007;GO:0005007;GO:0005524;GO:0005524;GO:0005524;GO:0005634;GO:0005737;GO:0005829;GO:0005886;GO:0005886;GO:0006468;GO:0006468;GO:0008201;GO:0008284;GO:0008284;GO:0008284;GO:0008543;GO:0008543;GO:0008543;GO:0010863;GO:0016020;GO:0016021;GO:0016021;GO:0016021;GO:0016301;GO:…	K04362	EC:2.7.10.1	T	1CWAC;1B422;0DFEA;09U4P;12P10;KOG0200;0V53S;18VM8;0UQBT	Fibroblast growth factor receptor 1 [Source:RGD Symbol;Acc:620713]	79114	Q04589
ENSRNOG00000047895	110.226	72.6361	147.817	2.03503	1.02505	0.0101533	0.250112	7	70328391	70333166	+	2083	Mettl1	GO:0000049;GO:0003723;GO:0005634;GO:0005634;GO:0005634;GO:0005654;GO:0005730;GO:0005829;GO:0006400;GO:0006400;GO:0006400;GO:0006400;GO:0008033;GO:0008168;GO:0008176;GO:0008176;GO:0008176;GO:0008176;GO:0008176;GO:0008176;GO:0008176;GO:0016740;GO:0030488;GO:0030488;GO:0032259;GO:0036265;GO:0043527;GO:0106004;	K03439	EC:2.1.1.33	J	12NAP;0DGRM;KOG3115;1CRFM;09VGW;1B3UV;0UIM4;0V6G5;191T5	methyltransferase like 1 [Source:RGD Symbol;Acc:1593036]	679091	M0R637
ENSRNOG00000012213	68.6595	45.2722	92.0467	2.03318	1.02374	0.028771	0.392197	10	13996645	14002910	+	1182	Nthl1	GO:0000703;GO:0000703;GO:0003677;GO:0003677;GO:0003677;GO:0003684;GO:0003690;GO:0003690;GO:0003824;GO:0003824;GO:0003906;GO:0003906;GO:0003906;GO:0003906;GO:0003906;GO:0003906;GO:0003906;GO:0004519;GO:0005634;GO:0005634;GO:0005634;GO:0005634;GO:0005634;GO:0005634;GO:0005634;GO:0005739;GO:0005739;GO:0005739;GO:0006281;GO:0006281;GO:0006281;GO:0006284;GO:0006284;GO:0006285;GO:0006285;GO:0006285;GO:…	K10773	EC:4.2.99.18	L	18TAX;0DQ4S;1CZ60;0VCEC;12TTM;KOG1921;0UTEC;0A1IT;1AYM3	nth-like DNA glycosylase 1 [Source:RGD Symbol;Acc:1309289]	29541	D4A4E8
ENSRNOG00000005374	223.306	147.245	299.366	2.03311	1.02369	0.00743293	0.210119	14	77308204	77321977	-	1781	Lyar	GO:0000122;GO:0000122;GO:0001750;GO:0003677;GO:0003677;GO:0005634;GO:0005654;GO:0005730;GO:0005730;GO:0006364;GO:0033613;GO:0042802;GO:0045824;GO:0045943;GO:0048821;GO:0050766;GO:0140416;GO:0003677;	K15263	-	D	0UMKD;1CXGM;13NTW;KOG2186;0DNJD;0VBUI;18SVV;1B3MP;0A0Y5	Ly1 antibody reactive [Source:RGD Symbol;Acc:1305352]	289707	Q6AYK5
ENSRNOG00000032546	1032.11	682.899	1381.32	2.02274	1.01631	0.00138129	0.0899029	7	11786105	11824742	-	6015	Dot1l	GO:0000077;GO:0000077;GO:0000781;GO:0003674;GO:0005575;GO:0005634;GO:0005634;GO:0005634;GO:0005634;GO:0005634;GO:0005634;GO:0005654;GO:0006281;GO:0006281;GO:0006325;GO:0006342;GO:0006342;GO:0006348;GO:0006348;GO:0008150;GO:0008168;GO:0008284;GO:0008284;GO:0010467;GO:0010467;GO:0016740;GO:0018024;GO:0018024;GO:0018024;GO:0018024;GO:0018024;GO:0031151;GO:0031151;GO:0031151;GO:0031151;GO:0032259;GO:…	K11427	EC:2.1.1.360	D;K;B	0URCG;1B20R;0DPVS;18UY6;0A2I0;KOG3924;0VDE2;1CYVA;13I17	DOT1 like histone lysine methyltransferase [Source:RGD Symbol;Acc:1306644]	362831	D3ZCP0
ENSRNOG00000045668	290.713	192.834	388.593	2.01517	1.0109	0.0330838	0.419422	11	31539016	31558851	+	1783	Ifnar2	GO:0004896;GO:0004905;GO:0004905;GO:0005515;GO:0005615;GO:0005886;GO:0005887;GO:0006357;GO:0008283;GO:0016021;GO:0019221;GO:0019901;GO:0035455;GO:0035456;GO:0051607;GO:0060337;GO:0060337;	K05131	-	T	0IHB9;1AVUW;0A4UV;0UM1K;0V8YW;0DIHJ;13N46;18SU1;1CT80	interferon alpha and beta receptor subunit 2 [Source:RGD Symbol;Acc:1583177]	686326	M0R8H7
ENSRNOG00000012216	205.113	136.128	274.099	2.01354	1.00973	0.0111198	0.260536	17	8400146	8429338	-	2670	Tgfbi	GO:0001525;GO:0001525;GO:0002062;GO:0003674;GO:0005178;GO:0005178;GO:0005515;GO:0005518;GO:0005518;GO:0005518;GO:0005518;GO:0005604;GO:0005615;GO:0005615;GO:0005615;GO:0005615;GO:0005802;GO:0005802;GO:0007155;GO:0007155;GO:0007155;GO:0007155;GO:0007155;GO:0007155;GO:0008283;GO:0008283;GO:0030198;GO:0030198;GO:0030198;GO:0031012;GO:0031012;GO:0031012;GO:0042802;GO:0042802;GO:0050839;GO:0050840;GO:…	K19519	-	W;M	0UGFZ;0V4XK;1AVY8;0DF8R;KOG1437;18ZRS;1CPYC;13I26;09TYN	transforming growth factor, beta induced [Source:RGD Symbol;Acc:620017]	116487	D4A8G5
ENSRNOG00000055962	562.88	374.019	751.74	2.00989	1.00712	0.00219962	0.114698	X	157319046	157331204	-	2426	Bgn	GO:0005515;GO:0005539;GO:0009986;GO:0019800;GO:0030133;GO:0031012;GO:0042383;GO:0050840;GO:0060348;GO:0061975;	K08118	-	-	-	biglycan [Source:RGD Symbol;Acc:2207]	25181	P47853
ENSRNOG00000008482	285.102	189.533	380.67	2.00847	1.0061	0.0131048	0.279688	3	46803355	47025128	-	2193	Rbms1	GO:0003676;GO:0003723;GO:0005829;GO:1990904;GO:0003676;GO:0003676;GO:0003723;GO:0003723;GO:0003723;GO:1990904;GO:1990904;	K24990	-	S;L	13MYP;1CRND;0DGY4;0V6NN;18W03;0UIX0;KOG4733;09VPN;1AT7I	RNA binding motif, single stranded interacting protein 1 [Source:RGD Symbol;Acc:1307777]	362138	Q5PQP1
ENSRNOG00000042411	278.853	185.488	372.218	2.0067	1.00483	0.0245204	0.370076	5	152078220	152122684	-	3623	Rps6ka1	GO:0000166;GO:0000287;GO:0000287;GO:0004672;GO:0004672;GO:0004674;GO:0004674;GO:0004674;GO:0004674;GO:0004712;GO:0005524;GO:0005524;GO:0005524;GO:0005654;GO:0005829;GO:0005840;GO:0006468;GO:0006468;GO:0006915;GO:0016301;GO:0016310;GO:0016740;GO:0035556;GO:0035556;GO:0043027;GO:0043066;GO:0043154;GO:0045944;GO:0106310;GO:0106310;GO:0106311;GO:0106311;GO:2000491;GO:0000166;GO:0000287;GO:0000287;GO:…	K04373	EC:2.7.11.1	T;B	1AUJY;0V44X;1CP76;KOG0598;12P0N;0DEHF;0UJRS;194H7;09T66	ribosomal protein S6 kinase A1 [Source:RGD Symbol;Acc:620675]	81771	Q63531
ENSRNOG00000012508	58.1958	38.72	77.6716	2.00598	1.00431	0.033587	0.422857	2	241029693	241092582	+	3242	Slc39a8	GO:0005381;GO:0005384;GO:0005384;GO:0005385;GO:0005385;GO:0005765;GO:0005886;GO:0005886;GO:0006351;GO:0006355;GO:0006355;GO:0006487;GO:0006525;GO:0006829;GO:0006876;GO:0006882;GO:0006882;GO:0015086;GO:0015086;GO:0015106;GO:0015296;GO:0015701;GO:0016020;GO:0016323;GO:0016324;GO:0016324;GO:0030001;GO:0030026;GO:0030198;GO:0030198;GO:0031090;GO:0042391;GO:0046873;GO:0055085;GO:0061757;GO:0070574;GO:…	K14714	-	P	1CXES;191XX;0V7SX;1ASXQ;12QZZ;0DI4Y;0URUZ;09WUZ;KOG2693	solute carrier family 39 member 8 [Source:RGD Symbol;Acc:1308236]	295455	Q5FVQ0
ENSRNOG00000000122	262.691	174.882	350.499	2.0042	1.00302	0.0172514	0.316324	5	147185474	147204050	+	1685	Ak2	GO:0000166;GO:0004017;GO:0004017;GO:0004017;GO:0004017;GO:0004550;GO:0005524;GO:0005524;GO:0005524;GO:0005739;GO:0005758;GO:0006139;GO:0006139;GO:0006165;GO:0006172;GO:0006172;GO:0006172;GO:0016301;GO:0016310;GO:0016740;GO:0016776;GO:0016776;GO:0019205;GO:0019205;GO:0036126;GO:0046033;GO:0046034;GO:0046940;GO:0097226;	K00939	EC:2.7.4.3	F	0DEP7;1CPCX;0V4B1;09TBV;0UFNY;KOG3078;12N5Q	adenylate kinase 2 [Source:RGD Symbol;Acc:2077]	24184	P29410;A0A0G2JSG6
ENSRNOG00000009068	561.093	373.56	748.626	2.00403	1.00291	0.02244	0.354618	13	52588917	52592001	+	1423	Phlda3	GO:0005546;GO:0005547;GO:0005886;GO:0010314;GO:0032266;GO:0042771;GO:0043065;GO:0043065;GO:0043325;GO:0051898;GO:0080025;GO:1901981;	K23793	-	T	13RBN;0VHN9;1D35D;0IXIC;1B5P5;0A6UA;0DTQ9;0UV20	pleckstrin homology-like domain, family A, member 3 [Source:RGD Symbol;Acc:1310502]	363989	Q5PQT7
ENSRNOG00000019229	269.057	179.223	358.891	2.00248	1.00179	0.00434293	0.160697	1	85103519	85112619	+	1181	Fbl	GO:0000494;GO:0001094;GO:0001094;GO:0001650;GO:0001651;GO:0001652;GO:0001652;GO:0003723;GO:0003723;GO:0003723;GO:0003723;GO:0003723;GO:0005515;GO:0005634;GO:0005634;GO:0005634;GO:0005634;GO:0005654;GO:0005654;GO:0005654;GO:0005694;GO:0005730;GO:0005730;GO:0005730;GO:0005730;GO:0006364;GO:0006364;GO:0006364;GO:0008150;GO:0008168;GO:0008168;GO:0008168;GO:0008649;GO:0015030;GO:0015030;GO:0015030;GO:…	K14563	EC:2.1.1.-	A	0VAFW;09ZIX;12REI;KOG1596;18T28;0DNYC;0UFCD;1CXVU;1B1UN	fibrillarin [Source:RGD Symbol;Acc:1305542]	292747	P22509
ENSRNOG00000005958	1716.78	1144.36	2289.21	2.00042	1.0003	0.00144262	0.0921514	3	138055240	138116664	-	4668	Rrbp1	GO:0005515;GO:0005783;GO:0015031;GO:0015031;GO:0016020;GO:0016021;GO:0030176;GO:0030176;GO:0030176;	K14000	-	T;U	0IFNK;0UNK0;1ATNB;0DJSA;09YCF;12R31;0V99X;1CUJC	ribosome binding protein 1 [Source:RGD Symbol;Acc:1306536]	311483	F1M853
ENSRNOG00000003088	414.542	276.348	552.735	2.00014	1.0001	0.00314745	0.137828	11	64601029	64714252	+	4643	Arhgap31	GO:0005096;GO:0005096;GO:0005096;GO:0007165;GO:0007165;GO:0007264;GO:0007264;GO:0007264;GO:0017124;GO:0017124;GO:0030027;GO:0030027;GO:0030027;GO:0043547;	K20646	-	T	14T4S;0V0ZE;0E5GY;0WCG4;1B9WW;1DCGW;0AZZT;196RH;0KCYW	Rho GTPase activating protein 31 [Source:RGD Symbol;Acc:1306093]	288093	D4A987

## Sheet: Sheet2
id	baseMean	baseMean_C	baseMean_MCA	foldChange(MCA/C)(MCA/C)	log2FoldChange	pval	padj	Chromosome	Start Site	End Site	Direction	Length	Name	GO	KEGG	EC	eggNOG Class	eggNOG	Description	Entrez_geneID	UniProtAC
ENSRNOG00000015992	268.475	0.299434	536.651	1792.22	10.8075	0.00704957	0.20491	9	88918433	88921001	+	787	Ccl20	GO:0002548;GO:0005125;GO:0005125;GO:0005576;GO:0005576;GO:0005576;GO:0005615;GO:0005615;GO:0005615;GO:0006935;GO:0006935;GO:0006954;GO:0006954;GO:0006955;GO:0006955;GO:0007186;GO:0008009;GO:0008009;GO:0008009;GO:0008009;GO:0030593;GO:0031731;GO:0031731;GO:0032730;GO:0035584;GO:0035584;GO:0042060;GO:0043547;GO:0048020;GO:0048247;GO:0051770;GO:0060326;GO:0070098;GO:0070374;GO:0071222;GO:0071223;GO:…	K14625	-	O	13XZQ;0J2BK	C-C motif chemokine ligand 20 [Source:RGD Symbol;Acc:3646]	29538	P97884
ENSRNOG00000002792	97.2135	0.628643	193.798	308.28	8.2681	0.00294061	0.13259	14	18731378	18733391	-	1072	Cxcl2	GO:0001975;GO:0002237;GO:0002237;GO:0005125;GO:0005576;GO:0005576;GO:0005576;GO:0005615;GO:0005615;GO:0005615;GO:0005615;GO:0006935;GO:0006935;GO:0006935;GO:0006952;GO:0006952;GO:0006954;GO:0006954;GO:0006955;GO:0006955;GO:0007204;GO:0008009;GO:0008009;GO:0008009;GO:0008009;GO:0009408;GO:0010332;GO:0030593;GO:0030593;GO:0030595;GO:0032355;GO:0042060;GO:0045236;GO:0051384;GO:0061844;GO:0070098;GO:…	K05505	-	S;W	0DVJX;1D4WZ;0J3WE;1B6Q4;0VKBQ;13XHT;0A9A4;0UWC6	C-X-C motif chemokine ligand 2 [Source:RGD Symbol;Acc:70069]	114105	P30348
ENSRNOG00000007159	1024.66	7.30551	2042.01	279.516	8.12679	1.69753e-07	0.00015484	10	69412017	69413870	+	835	Ccl2	GO:0000165;GO:0001664;GO:0001664;GO:0001666;GO:0001912;GO:0001938;GO:0002523;GO:0002544;GO:0002548;GO:0002548;GO:0002687;GO:0002693;GO:0005125;GO:0005125;GO:0005125;GO:0005576;GO:0005576;GO:0005576;GO:0005576;GO:0005615;GO:0005615;GO:0005615;GO:0005615;GO:0005737;GO:0005791;GO:0006874;GO:0006935;GO:0006954;GO:0006954;GO:0006954;GO:0006955;GO:0006955;GO:0007010;GO:0007179;GO:0007186;GO:0007568;GO:…	K14624	-	W	0A9MF;0J1ST;0VKCZ;13VZX;1D54A;0DVIR;0UW9M;1B6T0;1942X	C-C motif chemokine ligand 2 [Source:RGD Symbol;Acc:3645]	24770	P14844
ENSRNOG00000000239	302.483	2.17786	602.788	276.78	8.11259	1.40318e-07	0.000141916	10	69423086	69424979	+	850	Ccl7	GO:0002548;GO:0005125;GO:0005576;GO:0005576;GO:0005576;GO:0005615;GO:0005615;GO:0005615;GO:0005615;GO:0006935;GO:0006954;GO:0006954;GO:0006955;GO:0006955;GO:0007010;GO:0007010;GO:0007186;GO:0008009;GO:0008009;GO:0008009;GO:0008009;GO:0008009;GO:0008201;GO:0008360;GO:0008360;GO:0010332;GO:0030335;GO:0030335;GO:0030593;GO:0031726;GO:0031726;GO:0031727;GO:0031727;GO:0043547;GO:0048020;GO:0048245;GO:…	K05509	-	W	0DW80;0A9MF;0UWUA;0J1ST;1B71A;0VKCZ;1D5FR;13VZX;196I9	C-C motif chemokine ligand 7 [Source:RGD Symbol;Acc:1359152]	287561	Q9QXY8
ENSRNOG00000045654	37.195	0.314321	74.0758	235.669	7.88062	4.48161e-05	0.0113316	20	2699712	2701815	-	2104	LOC108348108	-	K03283	-	O;L	1ATY5;09YID;0USSJ;0V9G5;KOG0101;12PIY;1CUSF;191DD;0DH5C;1ATY5;09YID;0USSJ;0V9G5;KOG0101;12PIY;1CUSF;191DD;0DH5C	heat shock 70 kDa protein 1A [Source:RGD Symbol;Acc:11425585]	108348108	P0DMW1
ENSRNOG00000050647	1267.84	11.9365	2523.75	211.432	7.72405	0.000312251	0.0410083	20	4877324	4879779	-	2456	Hspa1b	-	K03283	-	-	-	heat shock protein family A (Hsp70) member 1B [Source:RGD Symbol;Acc:2840]	24472	P0DMW0;P0DMW1
ENSRNOG00000001414	1819.92	24.323	3615.51	148.646	7.21574	0.000619221	0.0596451	12	22641104	22651482	+	3063	Serpine1	GO:0001525;GO:0002020;GO:0004867;GO:0005102;GO:0005576;GO:0005615;GO:0005615;GO:0010469;GO:0010757;GO:0010951;GO:0014912;GO:0030194;GO:0030336;GO:0032757;GO:0033629;GO:0035491;GO:0045766;GO:0048260;GO:0050729;GO:0050829;GO:0051918;GO:0061044;GO:0062023;GO:0070062;GO:0071222;GO:0090026;GO:0090399;GO:0097187;GO:1901331;GO:1902042;GO:2000098;GO:2000352;	K03982	-	V	12U1A;0DFHY;0UGVD;1ASJ0;09U85;KOG2392;0V57A;1CQ7S;18TF4	serpin family E member 1 [Source:RGD Symbol;Acc:3249]	24617	P20961
ENSRNOG00000017386	207.177	3.43515	410.92	119.622	6.90234	0.014244	0.289734	1	72635267	72643255	+	1691	Il11	GO:0007165;GO:0005125;GO:0005142;GO:0005737;GO:0007165;GO:0008083;GO:0008284;GO:0008284;GO:0033138;GO:0043410;GO:0045944;GO:0046888;GO:0050731;	K05417	-	O;T	0IWMH;192RW;0VI2S;1AVZF;1D3AV;0A6VW;0UV9U;13Q7F;0DTYU	interleukin 11 [Source:RGD Symbol;Acc:621475]	171040	G3V890
ENSRNOG00000007002	192.538	3.38679	381.69	112.7	6.81634	0.000348346	0.0435645	14	84482674	84500642	+	2226	Lif	GO:0001974;GO:0005102;GO:0005125;GO:0005125;GO:0005125;GO:0005125;GO:0005125;GO:0005146;GO:0005146;GO:0005146;GO:0005576;GO:0005576;GO:0005576;GO:0005615;GO:0005829;GO:0006955;GO:0006955;GO:0007260;GO:0007566;GO:0008083;GO:0008083;GO:0008083;GO:0008284;GO:0008284;GO:0008285;GO:0010628;GO:0019827;GO:0030324;GO:0033138;GO:0033141;GO:0033630;GO:0042531;GO:0043410;GO:0045595;GO:0045651;GO:0045835;GO:…	K05419	-	W;K	1AW5H;13KJX;0UKPG;09WYC;0V7WJ;1CSZC;0DI8W;0ITBQ;18X3D	LIF, interleukin 6 family cytokine [Source:RGD Symbol;Acc:620865]	60584	O88211
ENSRNOG00000050251	15.2867	0.299434	30.274	101.104	6.6597	0.00140867	0.0912629	3	114772603	114776155	+	1151	MGC105649	GO:0005634;GO:0009617;	-	-	S	1B6S5;13VC0;0DVHR;1D4UC;0VK77;0UW9E;0J1F7;19410;0A9AE	hypothetical LOC302884 [Source:RGD Symbol;Acc:1359583]	302884	Q5RK28
ENSRNOG00000010478	1402.8	30.6722	2774.92	90.4702	6.49937	0.00910455	0.237873	6	127941526	128080889	+	7022	LOC299282	GO:0005615;GO:0005615;GO:0005615;GO:0005615;GO:0005615;GO:0005615;GO:0005615;GO:0005615;GO:0005615;GO:0005615;GO:0005615;GO:0005615;GO:0005615;GO:0005615;	K04525	-	V	0UM4R;1B1G0;09U5H;KOG2392;12R4F;0V54I;1CQ4S;0DFF0;18T05;KOG2392;KOG2392;KOG1075	Serine protease inhibitor [Source:RGD Symbol;Acc:3745]	24795	P09006
ENSRNOG00000002802	166.463	3.69361	329.233	89.1357	6.47793	0.00317369	0.138223	14	18743685	18745457	-	926	Cxcl1	GO:0005125;GO:0005576;GO:0005576;GO:0005576;GO:0005615;GO:0005615;GO:0006935;GO:0006935;GO:0006935;GO:0006952;GO:0006952;GO:0006955;GO:0006955;GO:0007165;GO:0008009;GO:0008009;GO:0032930;GO:0060326;GO:0070965;GO:1902035;	K05505	-	S;W	0DVJX;1D4WZ;19409;0J3WE;1B6Q4;0VKBQ;13XHT;0A9A4;0UWC6	C-X-C motif chemokine ligand 1 [Source:RGD Symbol;Acc:619869]	81503	P14095
ENSRNOG00000011406	85.3137	1.9119	168.715	88.245	6.46344	0.00159255	0.096001	10	70884531	70886355	+	631	Ccl4	GO:0005125;GO:0005576;GO:0005576;GO:0005576;GO:0005615;GO:0005615;GO:0006935;GO:0006955;GO:0006955;GO:0007165;GO:0008009;GO:0008009;GO:0035690;GO:0060326;	K12964	-	W;T	13X8V;1B6HY;0UVZK;196B4;1D4A0;0DUZ9;0J4I9;0A8E2;0VJA1	C-C motif chemokine ligand 4 [Source:RGD Symbol;Acc:620441]	116637	P50230
ENSRNOG00000011205	45.7713	1.19774	90.3448	75.4297	6.23706	0.00291102	0.132579	10	70869513	70871066	-	757	Ccl3	GO:0000165;GO:0000165;GO:0001649;GO:0001649;GO:0001775;GO:0001775;GO:0002548;GO:0002548;GO:0002548;GO:0004672;GO:0004672;GO:0004698;GO:0004698;GO:0005125;GO:0005576;GO:0005576;GO:0005576;GO:0005576;GO:0005615;GO:0005615;GO:0005615;GO:0005615;GO:0005737;GO:0005737;GO:0005829;GO:0005829;GO:0006468;GO:0006816;GO:0006816;GO:0006874;GO:0006874;GO:0006887;GO:0006887;GO:0006935;GO:0006935;GO:0006954;GO:…	K05408	-	T	196EQ;0UWD3;0DVHK;146RM;1D4YW;1B6KP;0J4I9;0A9HK;0VKER	C-C motif chemokine ligand 3 [Source:RGD Symbol;Acc:3647]	25542	P50229
ENSRNOG00000028259	10.4997	0.299434	20.7	69.1305	6.11125	0.00305876	0.135816	12	2213471	2217433	+	1846	Mcemp1	GO:0016020;GO:0016021;GO:0042802;	-	-	S	196BD;1D2B9;0DT07;0JDQ4;1AXK8;0A8SS;0VJX3;0UUV1;146FG	mast cell-expressed membrane protein 1 [Source:RGD Symbol;Acc:1565374]	498128	D4A545
ENSRNOG00000015366	20.7356	0.598868	40.8724	68.2495	6.09275	0.00339191	0.143271	9	42831742	42839837	-	1362	Neurl3	GO:0016567;GO:0061630;	K15689	EC:2.3.2.27	O	0UT31;0A549;143BT;18XFV;0DRZV;KOG4625;0VG88;1B2QE;1D221	neuralized E3 ubiquitin protein ligase 3 [Source:RGD Symbol;Acc:1359633]	316326	Q5M870
ENSRNOG00000016632	8.95822	0.332903	17.5835	52.8188	5.72298	0.00651402	0.194725	18	15650526	15688284	-	6384	Dsg3	GO:0005509;GO:0005886;GO:0007155;GO:0007156;GO:0016020;GO:0005509;GO:0005886;GO:0007155;GO:0007156;GO:0016020;	K07598	-	Z;U	0UI7C;09TST;1ATSE;1CPSY;0V4S4;0DF33;13JJ4;KOG3594;190JB	desmoglein 3 [Source:RGD Symbol;Acc:1592103]	291752	D3ZL74
ENSRNOG00000037409	30.7713	1.21262	60.33	49.7517	5.63667	0.00326534	0.140866	10	57415832	57436368	-	1152	Scimp	GO:0001726;GO:0001726;GO:0001772;GO:0001772;GO:0001772;GO:0001772;GO:0001772;GO:0002720;GO:0002732;GO:0002732;GO:0016020;GO:0016020;GO:0016020;GO:0016021;GO:0016021;GO:0016021;GO:0030175;GO:0030175;GO:0031256;GO:0031256;GO:0031259;GO:0031259;GO:0031666;GO:0031666;GO:0032735;GO:0032735;GO:0032755;GO:0032755;GO:0032874;GO:0032874;GO:0034138;GO:0034138;GO:0034142;GO:0034142;GO:0034154;GO:0034154;GO:…	-	-	S;T	0A93G;193YH;1B6C3;0VJZV;13U6C;1D4AC;0UW04;0DUZN;0J1IN	SLP adaptor and CSK interacting membrane protein [Source:RGD Symbol;Acc:1593299]	691993	F1LYV1
ENSRNOG00000010513	242.724	10.0209	475.428	47.4437	5.56814	0.0182684	0.323127	4	28947965	28953067	-	1810	Tfpi2	GO:0004867;GO:0004867;GO:0004867;GO:0004867;GO:0005576;GO:0005576;GO:0005576;GO:0005615;GO:0007596;GO:0007599;GO:0010466;GO:0010466;GO:0010466;GO:0010951;GO:0030414;GO:0030414;GO:0030414;GO:0071498;	K23087	-	O	13R6T;0A4PW;0VFIZ;193KG;KOG4295;0DS67;1D1F8;1B2PG;0UUNJ	tissue factor pathway inhibitor 2 [Source:RGD Symbol;Acc:628629]	286926	Q8CF99
ENSRNOG00000054217	7.60173	0.314321	14.8891	47.3691	5.56588	0.00193926	0.108058	5	153507093	153531137	+	1230	Runx3	GO:0003677;GO:0003700;GO:0005524;GO:0005634;GO:0005634;GO:0005654;GO:0005730;GO:0005737;GO:0005829;GO:0006355;GO:0006468;GO:0043231;GO:0045893;GO:0071559;GO:1990837;GO:0003677;GO:0003700;GO:0005524;GO:0005634;GO:0006355;	K09279	-	-	-	RUNX family transcription factor 3 [Source:RGD Symbol;Acc:620082]	156726	Q91ZK1
ENSRNOG00000012280	656.031	28.7455	1283.32	44.6441	5.4804	3.16705e-05	0.00887017	2	158097843	158103653	+	1924	Ptx3	GO:0001550;GO:0001550;GO:0001849;GO:0001849;GO:0001849;GO:0001872;GO:0001872;GO:0001878;GO:0001878;GO:0005615;GO:0005615;GO:0005615;GO:0008228;GO:0008228;GO:0030198;GO:0030198;GO:0031012;GO:0031012;GO:0042802;GO:0042802;GO:0044793;GO:0044869;GO:0044869;GO:0044871;GO:0044871;GO:0045087;GO:0045087;GO:0045087;GO:0045087;GO:0045087;GO:0045429;GO:0045429;GO:0046597;GO:0046597;GO:0046790;GO:0046790;GO:…	-	-	U	1ARH7;0USD5;1CRK4;0A2FB;0DQ2G;0IHCT;0VD2S;18WWI;12U05	pentraxin 3 [Source:RGD Symbol;Acc:1593476]	689388	D3ZT94
ENSRNOG00000010278	116.823	5.41029	228.236	42.1855	5.39868	0.0284648	0.391209	4	3043231	3047807	+	1045	Il6	GO:0001781;GO:0001781;GO:0001878;GO:0002262;GO:0002262;GO:0002314;GO:0002314;GO:0002314;GO:0002384;GO:0002526;GO:0002639;GO:0002639;GO:0002639;GO:0002675;GO:0005102;GO:0005125;GO:0005125;GO:0005125;GO:0005125;GO:0005125;GO:0005138;GO:0005138;GO:0005138;GO:0005138;GO:0005576;GO:0005576;GO:0005576;GO:0005615;GO:0005615;GO:0005615;GO:0005615;GO:0005615;GO:0005737;GO:0005896;GO:0005896;GO:0005896;GO:…	K05405	-	W	0IW11;0VD3S;1D2QU;0UP2D;1B6G6;13QWV;0DQZU;193F5;0A68U	interleukin 6 [Source:RGD Symbol;Acc:2901]	24498	P20607
ENSRNOG00000010208	3210.33	153.726	6266.93	40.7669	5.34933	0.00466575	0.167534	X	1364786	1369384	-	740	Timp1	GO:0002248;GO:0005125;GO:0005515;GO:0005604;GO:0005615;GO:0008191;GO:0008191;GO:0008270;GO:0008284;GO:0010951;GO:0030414;GO:0031012;GO:0043086;GO:0051045;GO:0071492;GO:1901164;GO:1905049;GO:2001044;	K16451	-	O;W	13TYM;0DQST;0VE85;0A3XX;19004;1B53V;0UU4B;1D0Q5;KOG4745	TIMP metallopeptidase inhibitor 1 [Source:RGD Symbol;Acc:621675]	116510	P30120
ENSRNOG00000056209	6.1071	0.299434	11.9148	39.791	5.31437	0.00275926	0.129343	13	93939022	93960342	+	2511	Exo1	GO:0002455;GO:0003677;GO:0003677;GO:0003682;GO:0003824;GO:0004518;GO:0005634;GO:0005654;GO:0005886;GO:0006281;GO:0006298;GO:0006310;GO:0016446;GO:0016604;GO:0016788;GO:0035312;GO:0035312;GO:0045145;GO:0045190;GO:0048256;GO:0051908;	K10746	EC:3.1.-.-	-	-	exonuclease 1 [Source:RGD Symbol;Acc:1309465]	305000	-
ENSRNOG00000007943	5.8557	0.299434	11.412	38.1118	5.25217	0.00382047	0.154011	10	86582612	86595102	+	2910	Gsdma	GO:0001786;GO:0005546;GO:0005737;GO:0005737;GO:0005829;GO:0005886;GO:0006915;GO:0006915;GO:0012501;GO:0016020;GO:0042742;GO:0048471;GO:0048471;GO:0070269;GO:0070273;	K22141	-	S	0VE97;18WGC;13M0A;1D067;0US65;0IH8H;1B03H;0DNZP;0A3EH	gasdermin A [Source:RGD Symbol;Acc:1592062]	360619	D3ZA32
ENSRNOG00000005871	167.458	9.69169	325.225	33.5571	5.06855	0.00449469	0.163325	3	1452644	1468614	+	2040	Il1rn	GO:0005125;GO:0005125;GO:0005125;GO:0005149;GO:0005149;GO:0005149;GO:0005150;GO:0005151;GO:0005152;GO:0005152;GO:0005152;GO:0005576;GO:0005615;GO:0005615;GO:0005615;GO:0006954;GO:0006954;GO:0006955;GO:0006955;GO:0007165;GO:0034115;GO:0045352;GO:0045353;GO:0051384;GO:2000660;GO:2000660;GO:2000660;	K05481	-	W;T	13TYV;0A4QH;0VFJK;0DS6S;192T2;1D1FU;0URDG;0IZQ4;1B5Q8	interleukin 1 receptor antagonist [Source:RGD Symbol;Acc:621159]	60582	P25086
ENSRNOG00000049829	20.5685	1.22751	39.9095	32.5126	5.02293	6.33168e-05	0.014778	4	98337367	98523473	+	1127	AABR07060872.1	GO:0005615;GO:0006955;	-	-	S	1D4BU;0JET2;0DV18;0A9SH;0VKQ1;14622;1D395;196JH;0UWEJ;13VDD;0AB3K;0DTX1;0VM9P;0J107;1B6XQ	-	-	-
ENSRNOG00000003745	297.446	18.3548	576.537	31.4107	4.97319	0.00108015	0.0777239	13	109817728	109849632	-	2909	Atf3	GO:0000122;GO:0000122;GO:0000122;GO:0000976;GO:0000976;GO:0000977;GO:0000977;GO:0000977;GO:0000978;GO:0000978;GO:0000978;GO:0000981;GO:0001227;GO:0001227;GO:0001227;GO:0001228;GO:0001228;GO:0001228;GO:0001709;GO:0003677;GO:0003677;GO:0003677;GO:0003677;GO:0003677;GO:0003700;GO:0003700;GO:0003700;GO:0003700;GO:0005634;GO:0005634;GO:0005634;GO:0005634;GO:0005634;GO:0005634;GO:0005634;GO:0005654;GO:…	K09032	-	K	13JH3;0V8DB;1CTI3;1B4PM;0UMDQ;18WR8;KOG1414;09XF5;0DISV	activating transcription factor 3 [Source:RGD Symbol;Acc:2165]	25389	P29596
ENSRNOG00000002918	72.4971	4.85597	140.138	28.859	4.85095	2.24878e-10	1.02347e-06	10	90988732	90990203	+	1472	FAM187A	GO:0016020;GO:0016021;	-	-	S	12NE2;0DF5R;18X1J;09TVB;0IE2U;0UT4Z;1B338;0V4UJ;1CPVE	family with sequence similarity 187, member A [Source:RGD Symbol;Acc:1307851]	287741	Q6AXV7
ENSRNOG00000017686	77.0661	5.20567	148.926	28.6085	4.83837	0.0131723	0.280471	5	790833	819326	-	1756	Pi15	GO:0005576;GO:0005576;GO:0005615;GO:0006508;GO:0008233;	K24836	-	S;T	0A2D8;0DKFK;0VD8W;KOG3017;1CZ12;190N7;0UNGS;1B3EP;13J2F	peptidase inhibitor 15 [Source:RGD Symbol;Acc:1309577]	301489	F1M2W7
