# Supplementary figures and images for: Knockdown of ATF3 suppresses the progression of ischemic stroke through inhibiting ferroptosis
Source: Frontiers journal article supplement (doi:10.3389/fnmol.2022.1079338), 2023-01-18

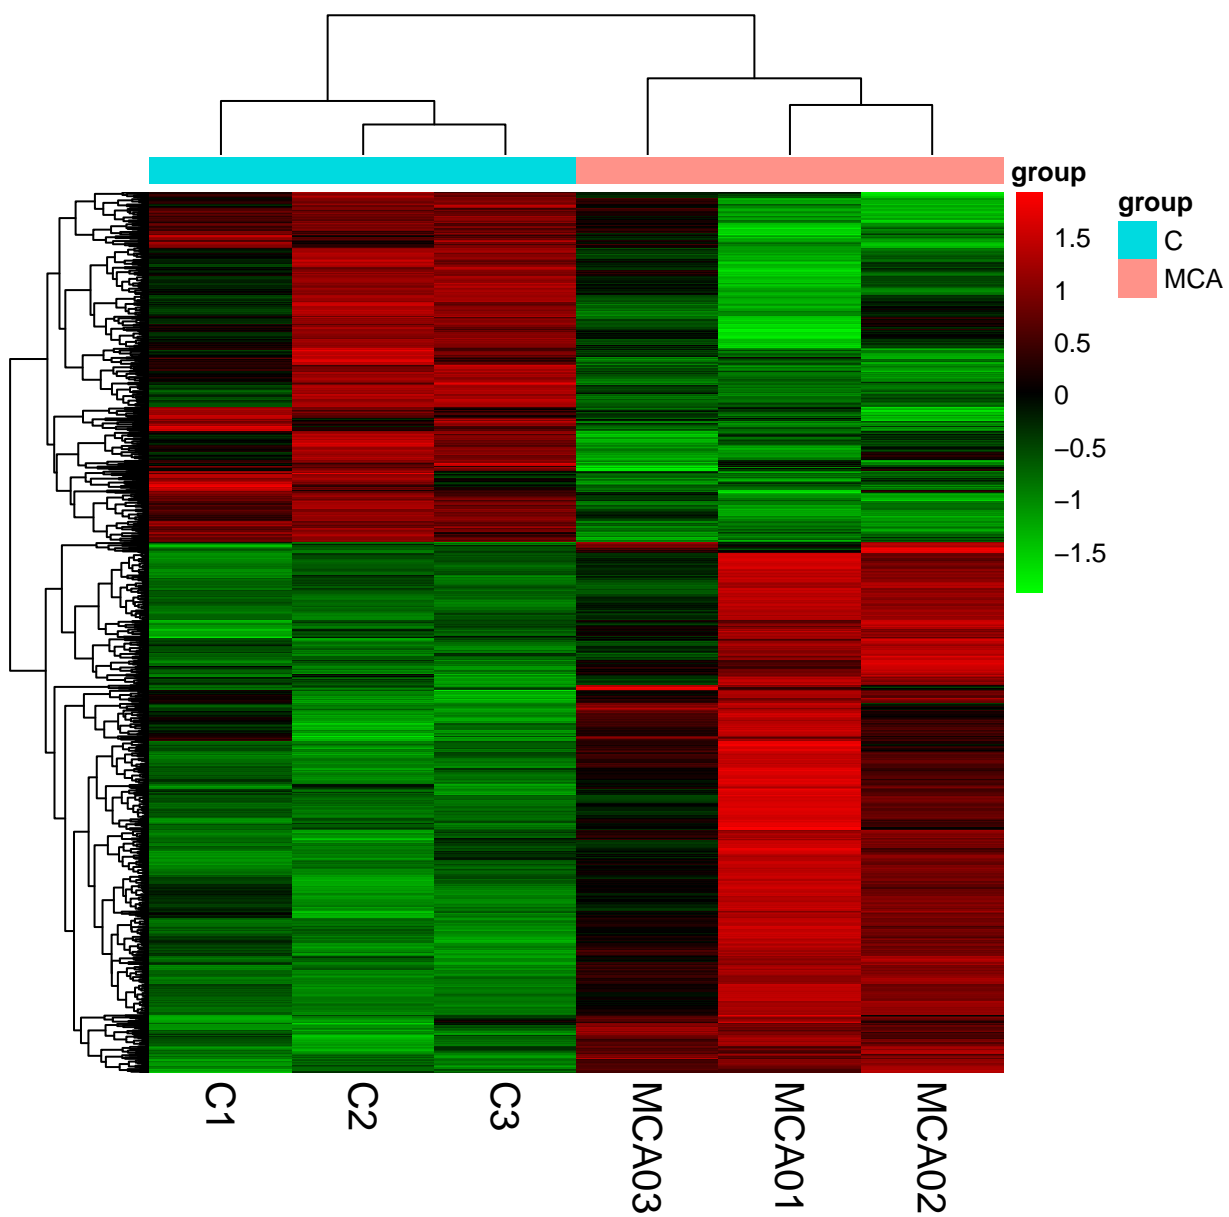

Supplement: Data_Sheet_2.ZIP [file Data_Sheet_2.ZIP]

# GO Enrichment

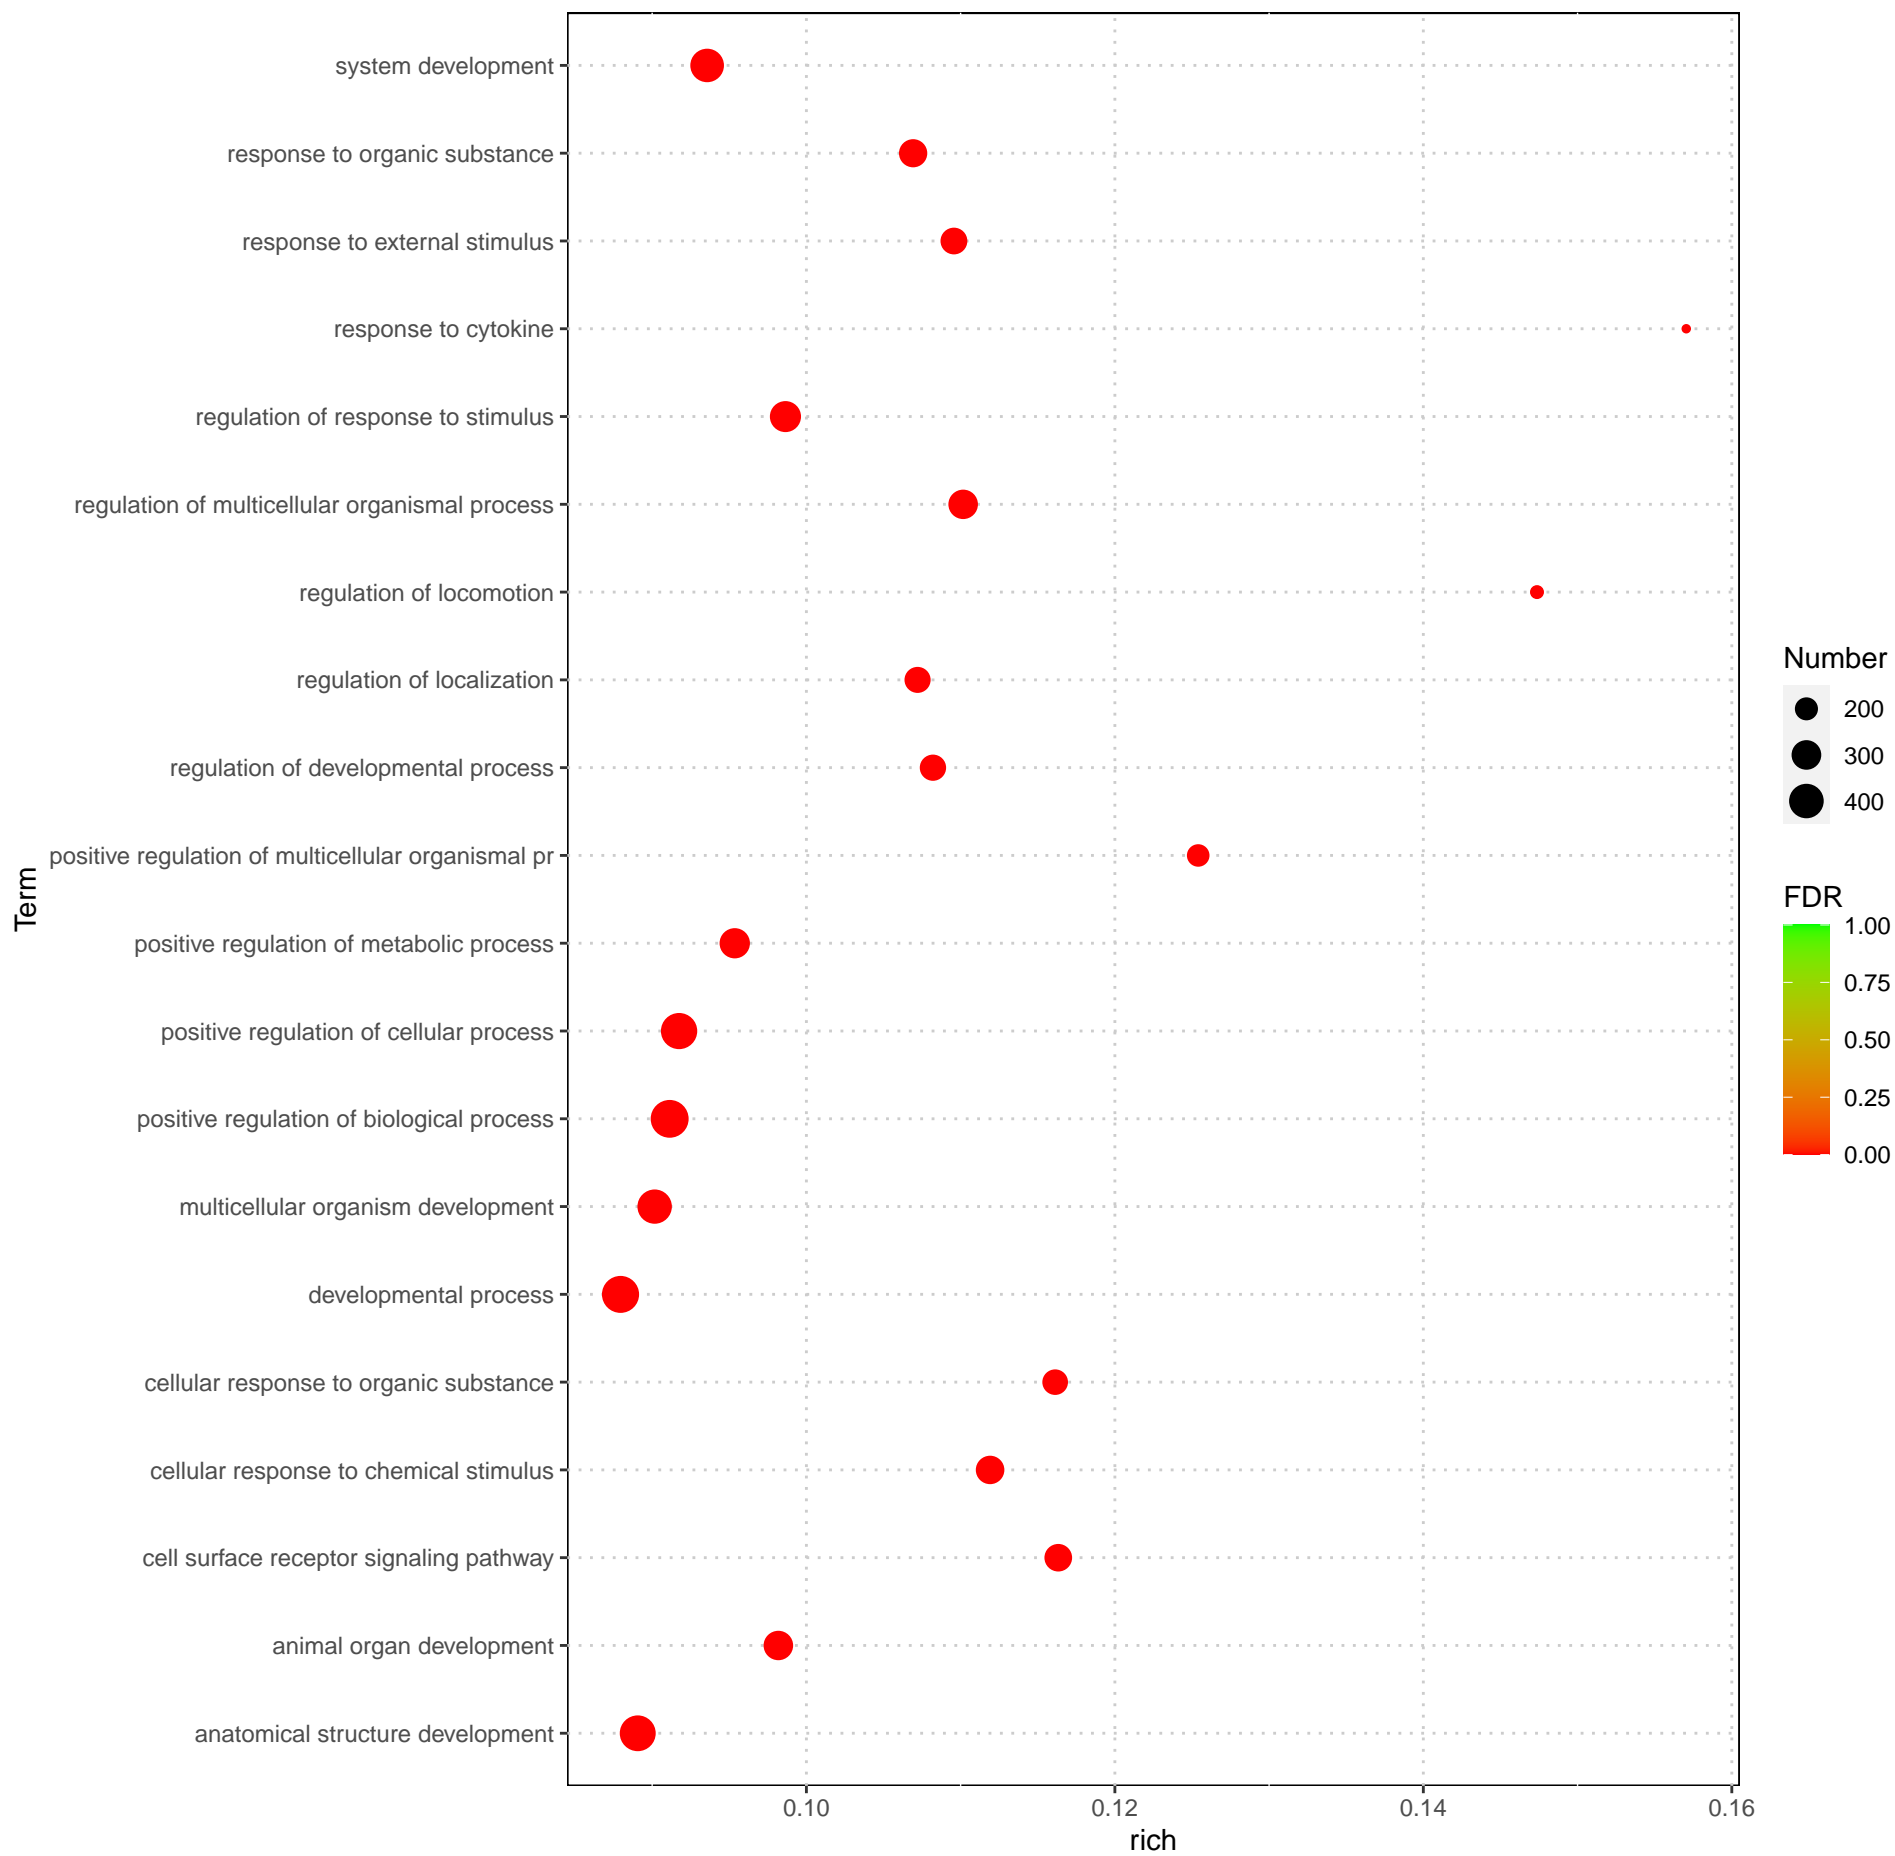

Supplement: Data_Sheet_2.ZIP [file Data_Sheet_2.ZIP]

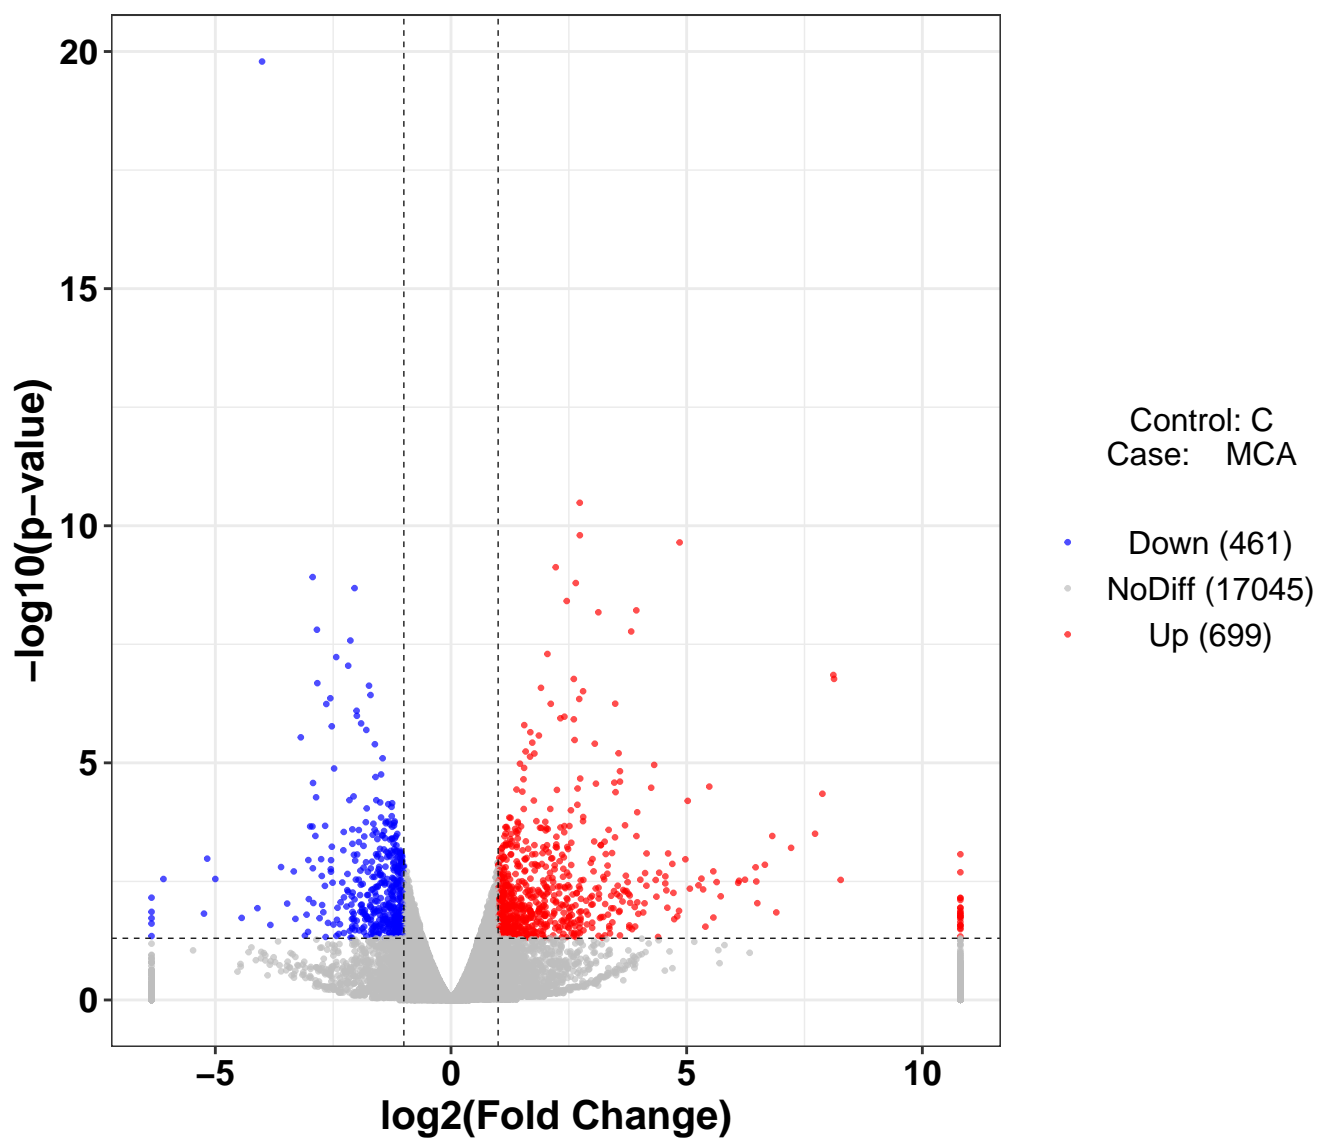

Supplement: Data_Sheet_2.ZIP [file Data_Sheet_2.ZIP]

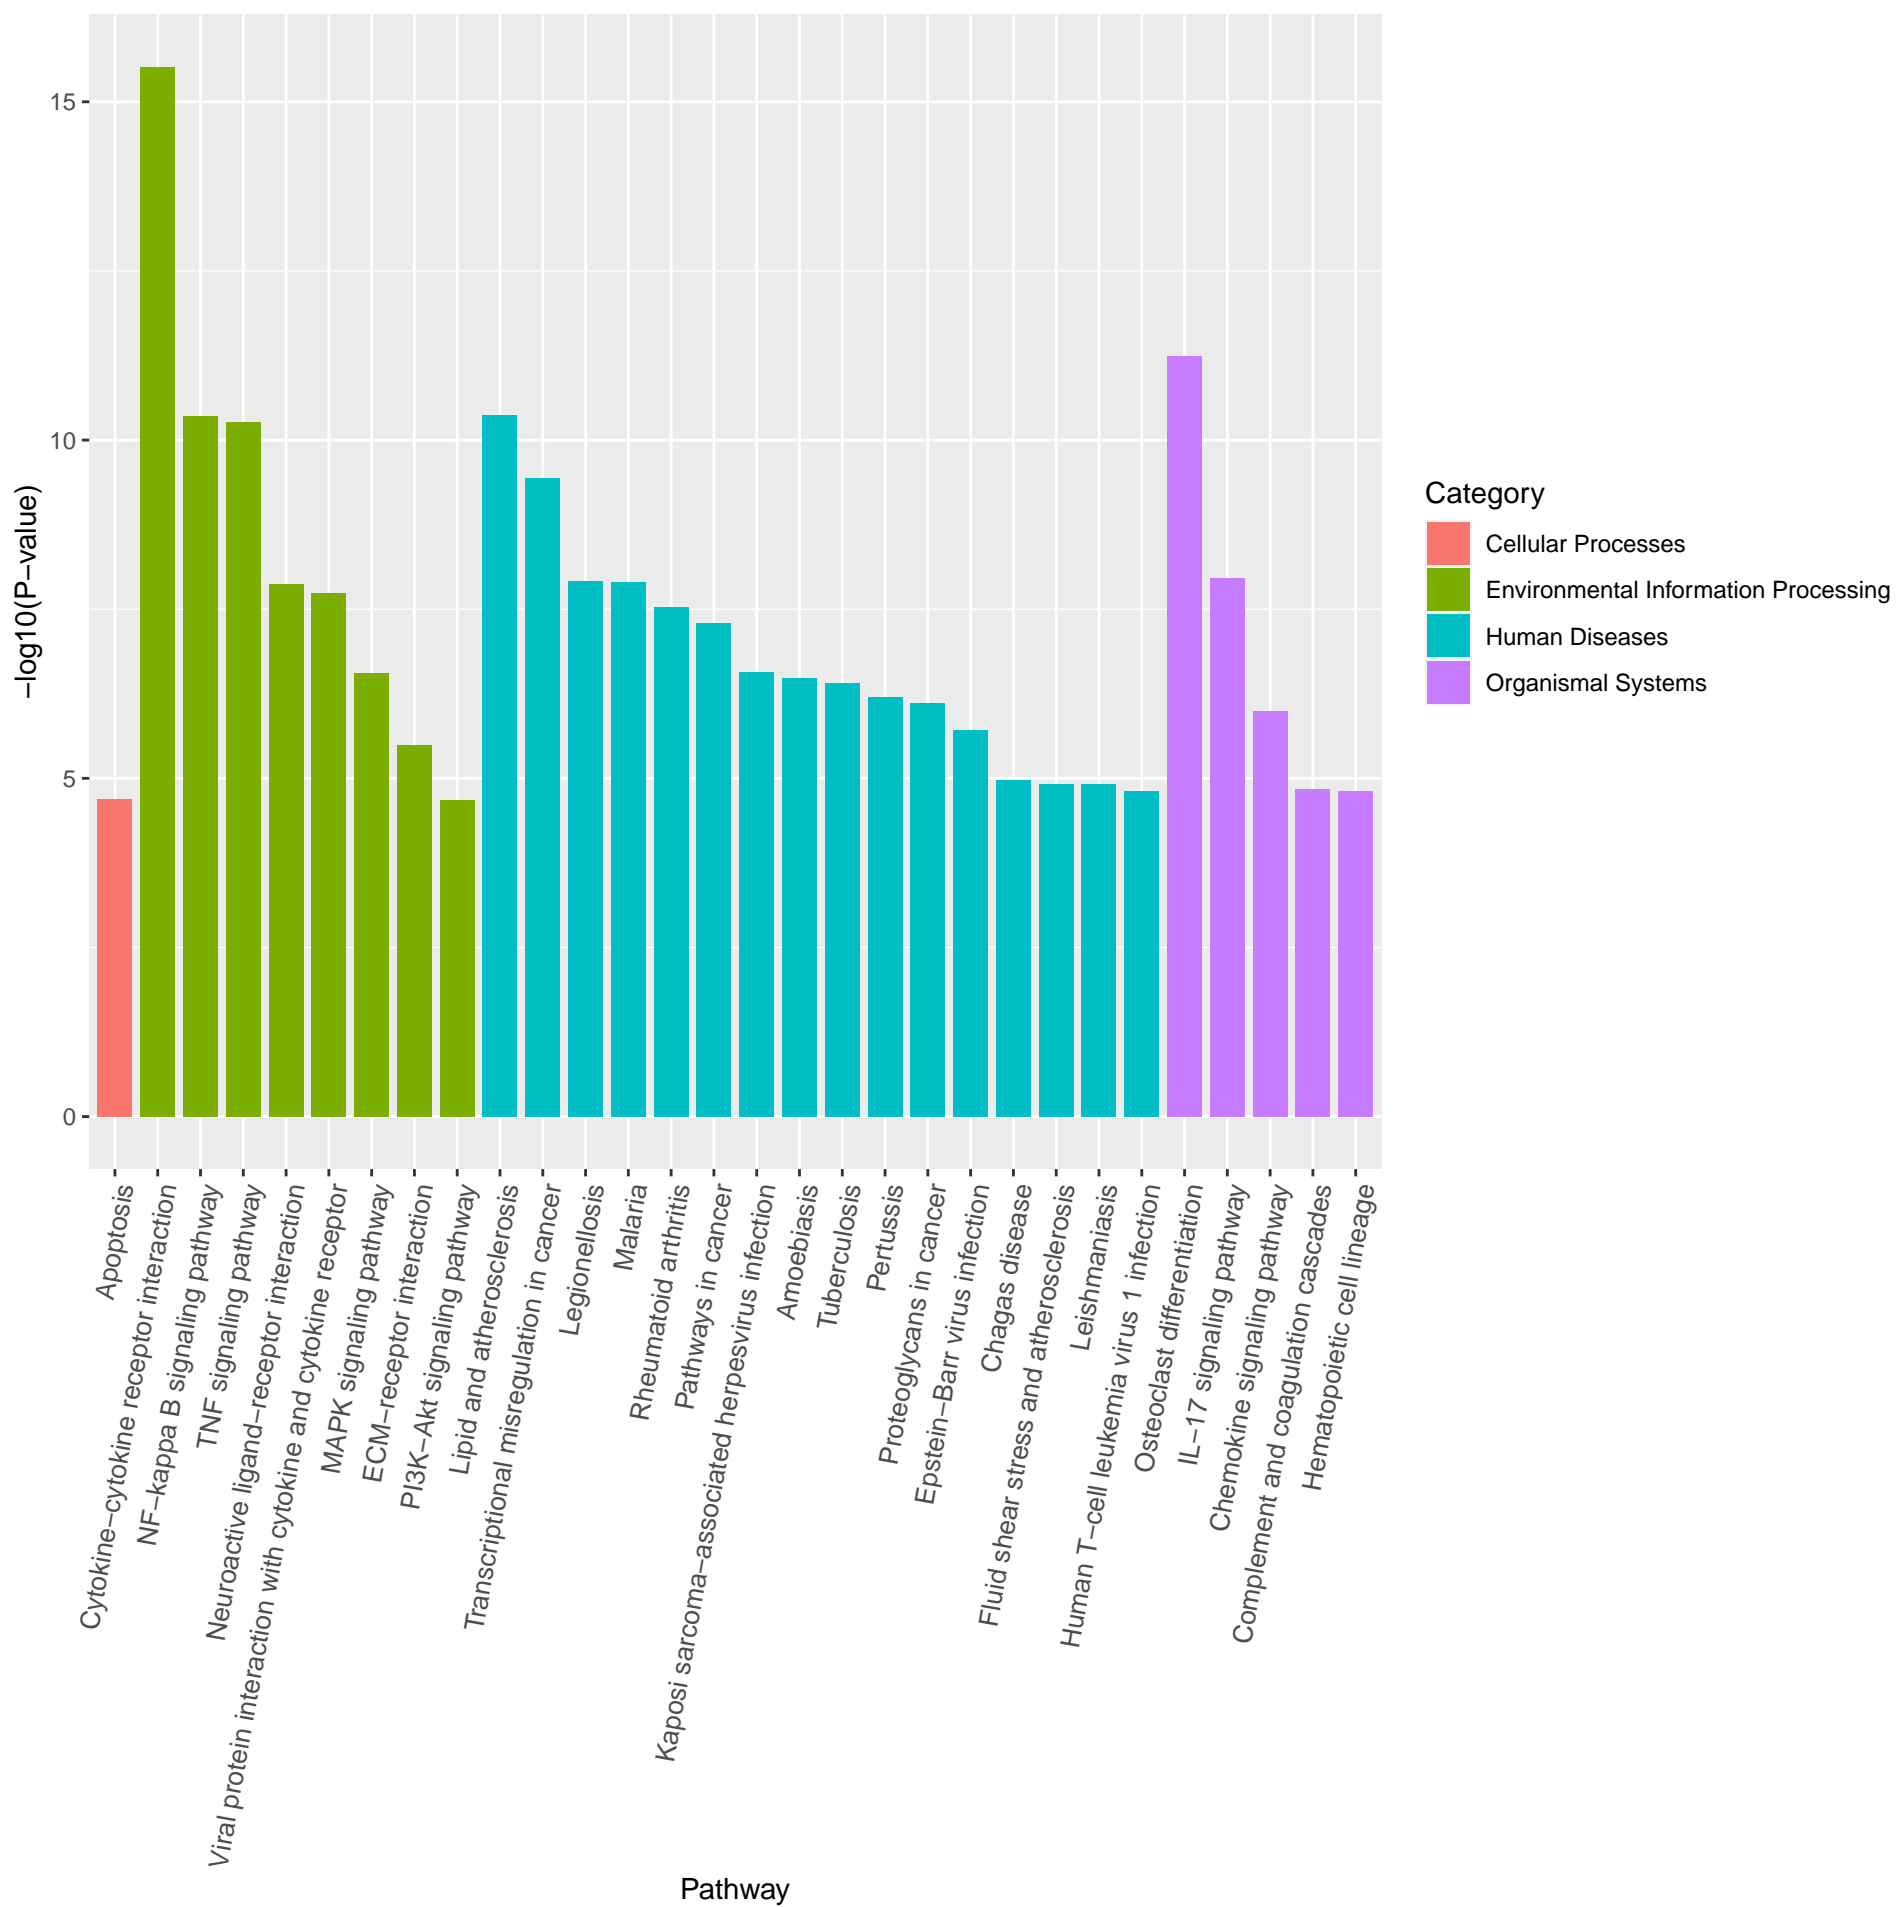

Supplement: Data_Sheet_2.ZIP [file Data_Sheet_2.ZIP]

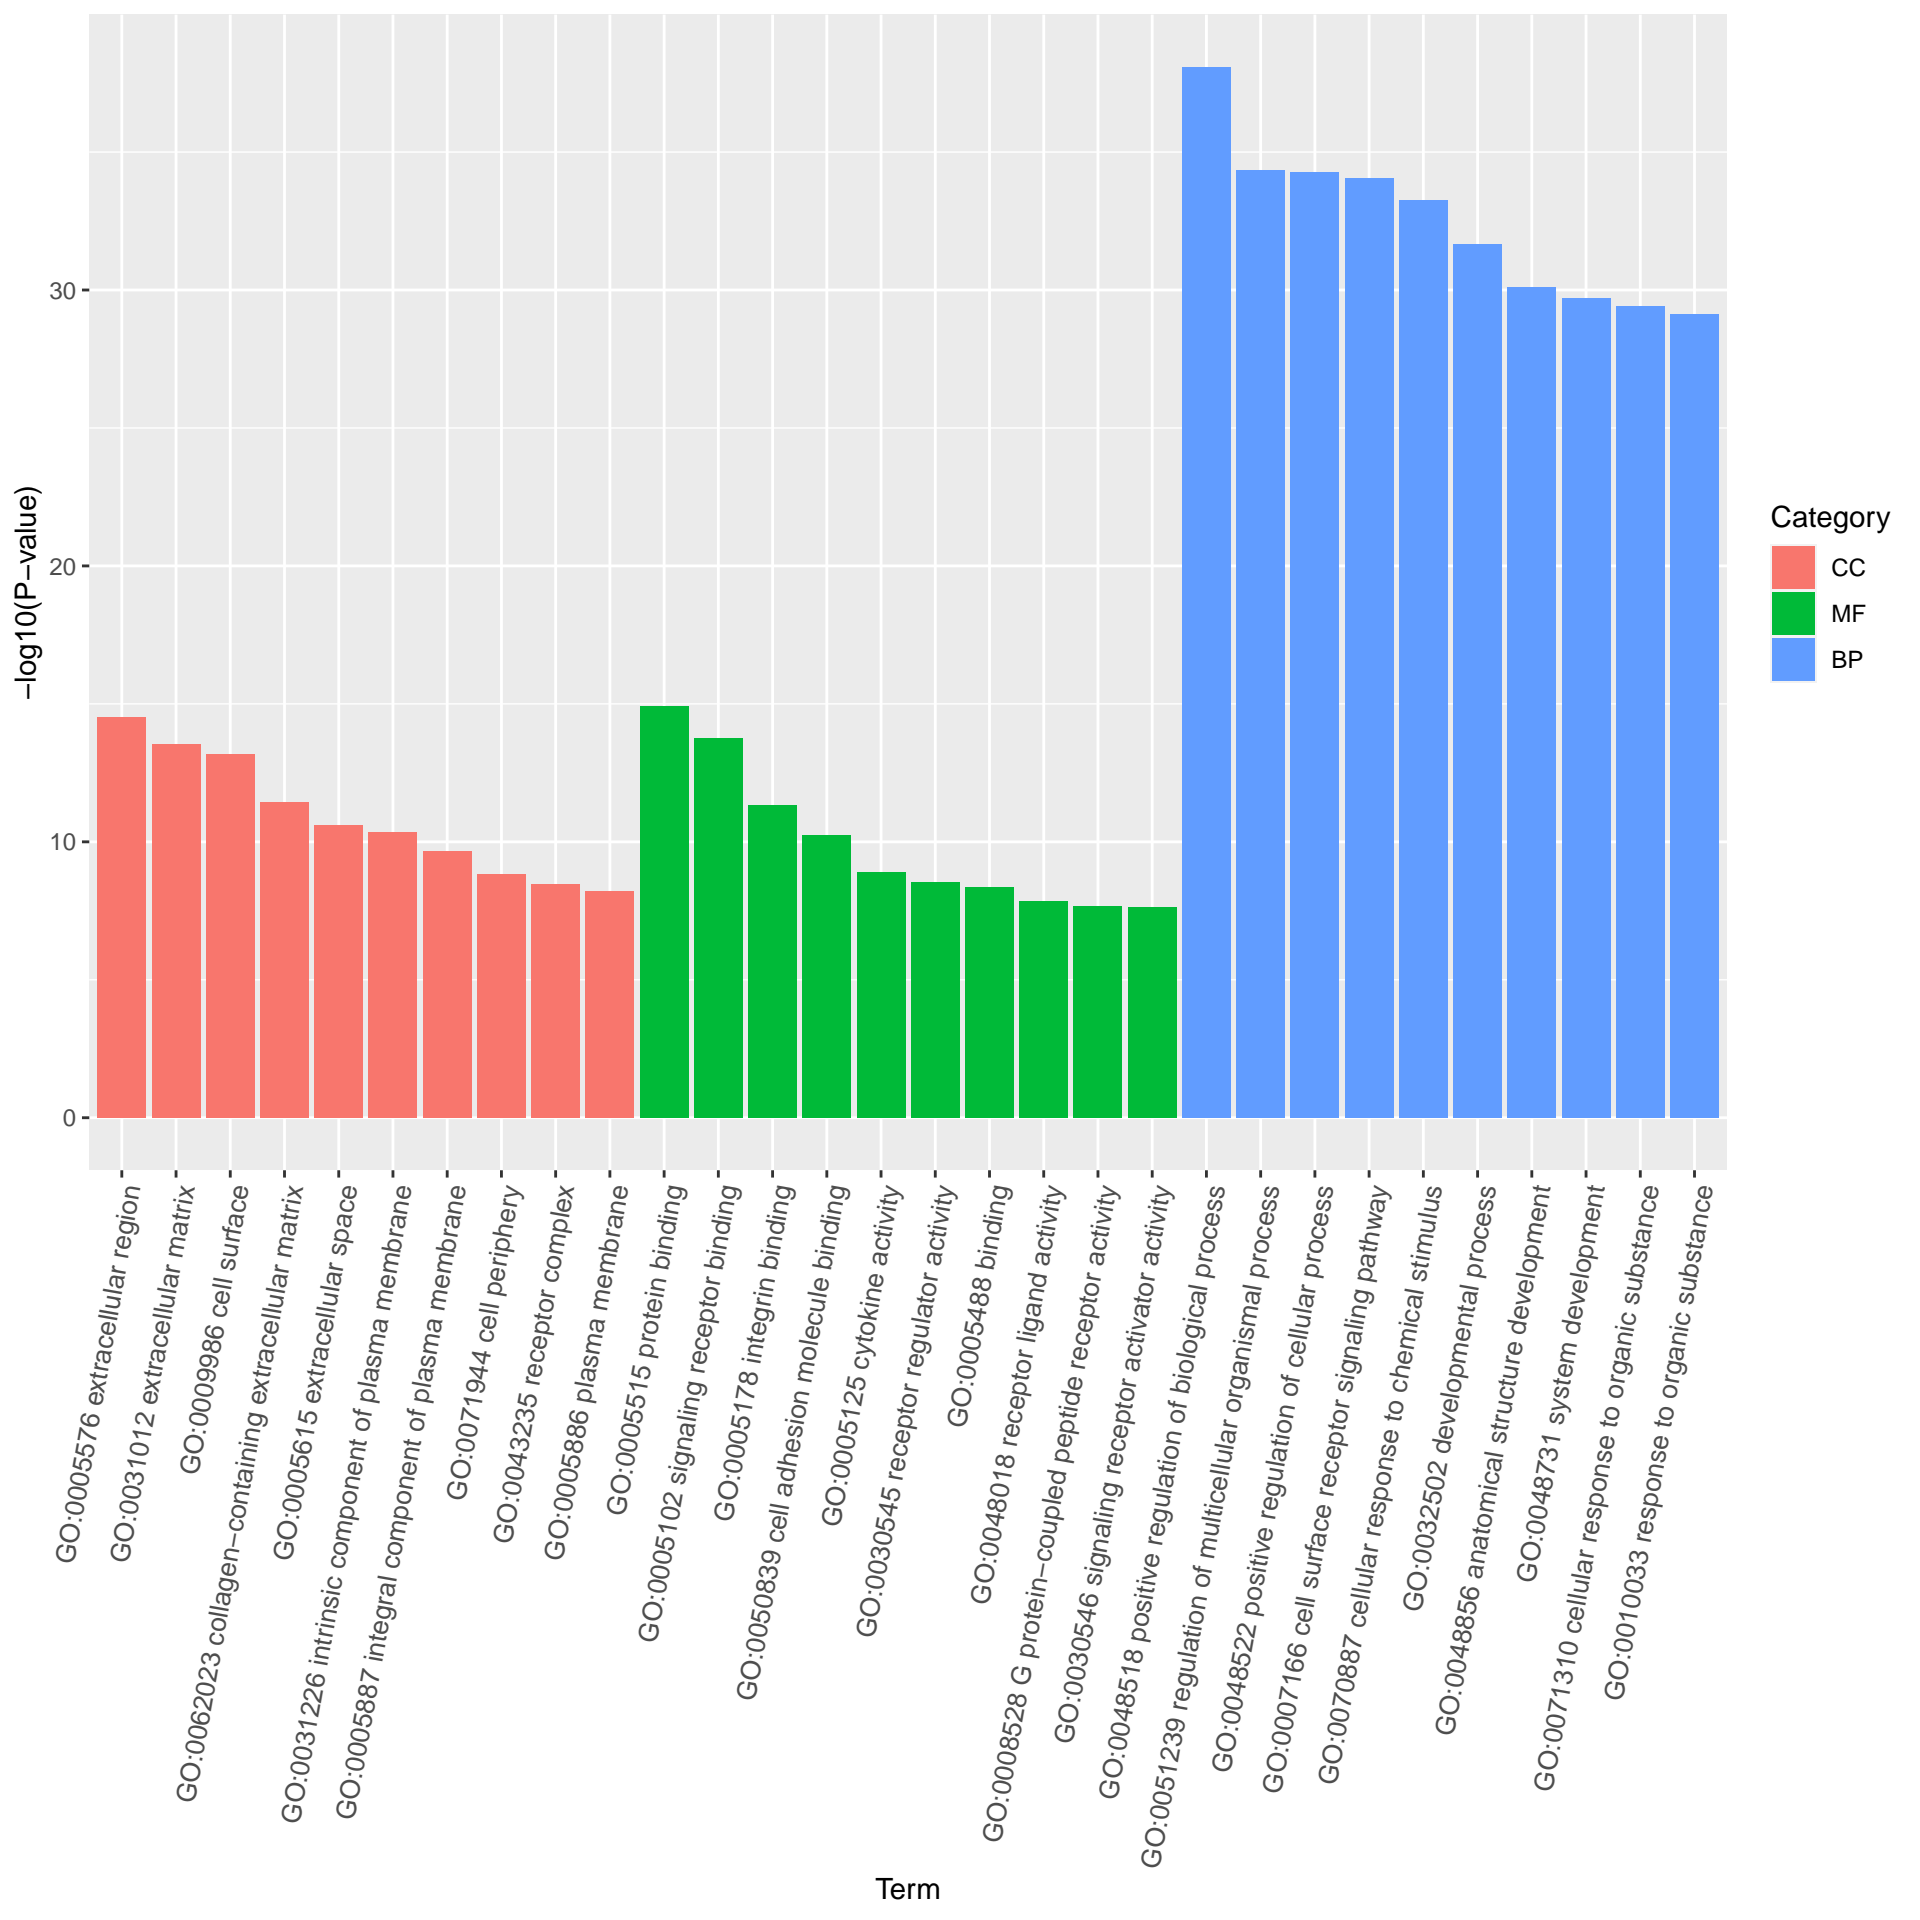

Supplement: Data_Sheet_2.ZIP [file Data_Sheet_2.ZIP]

# KEGG Pathway Enrichment

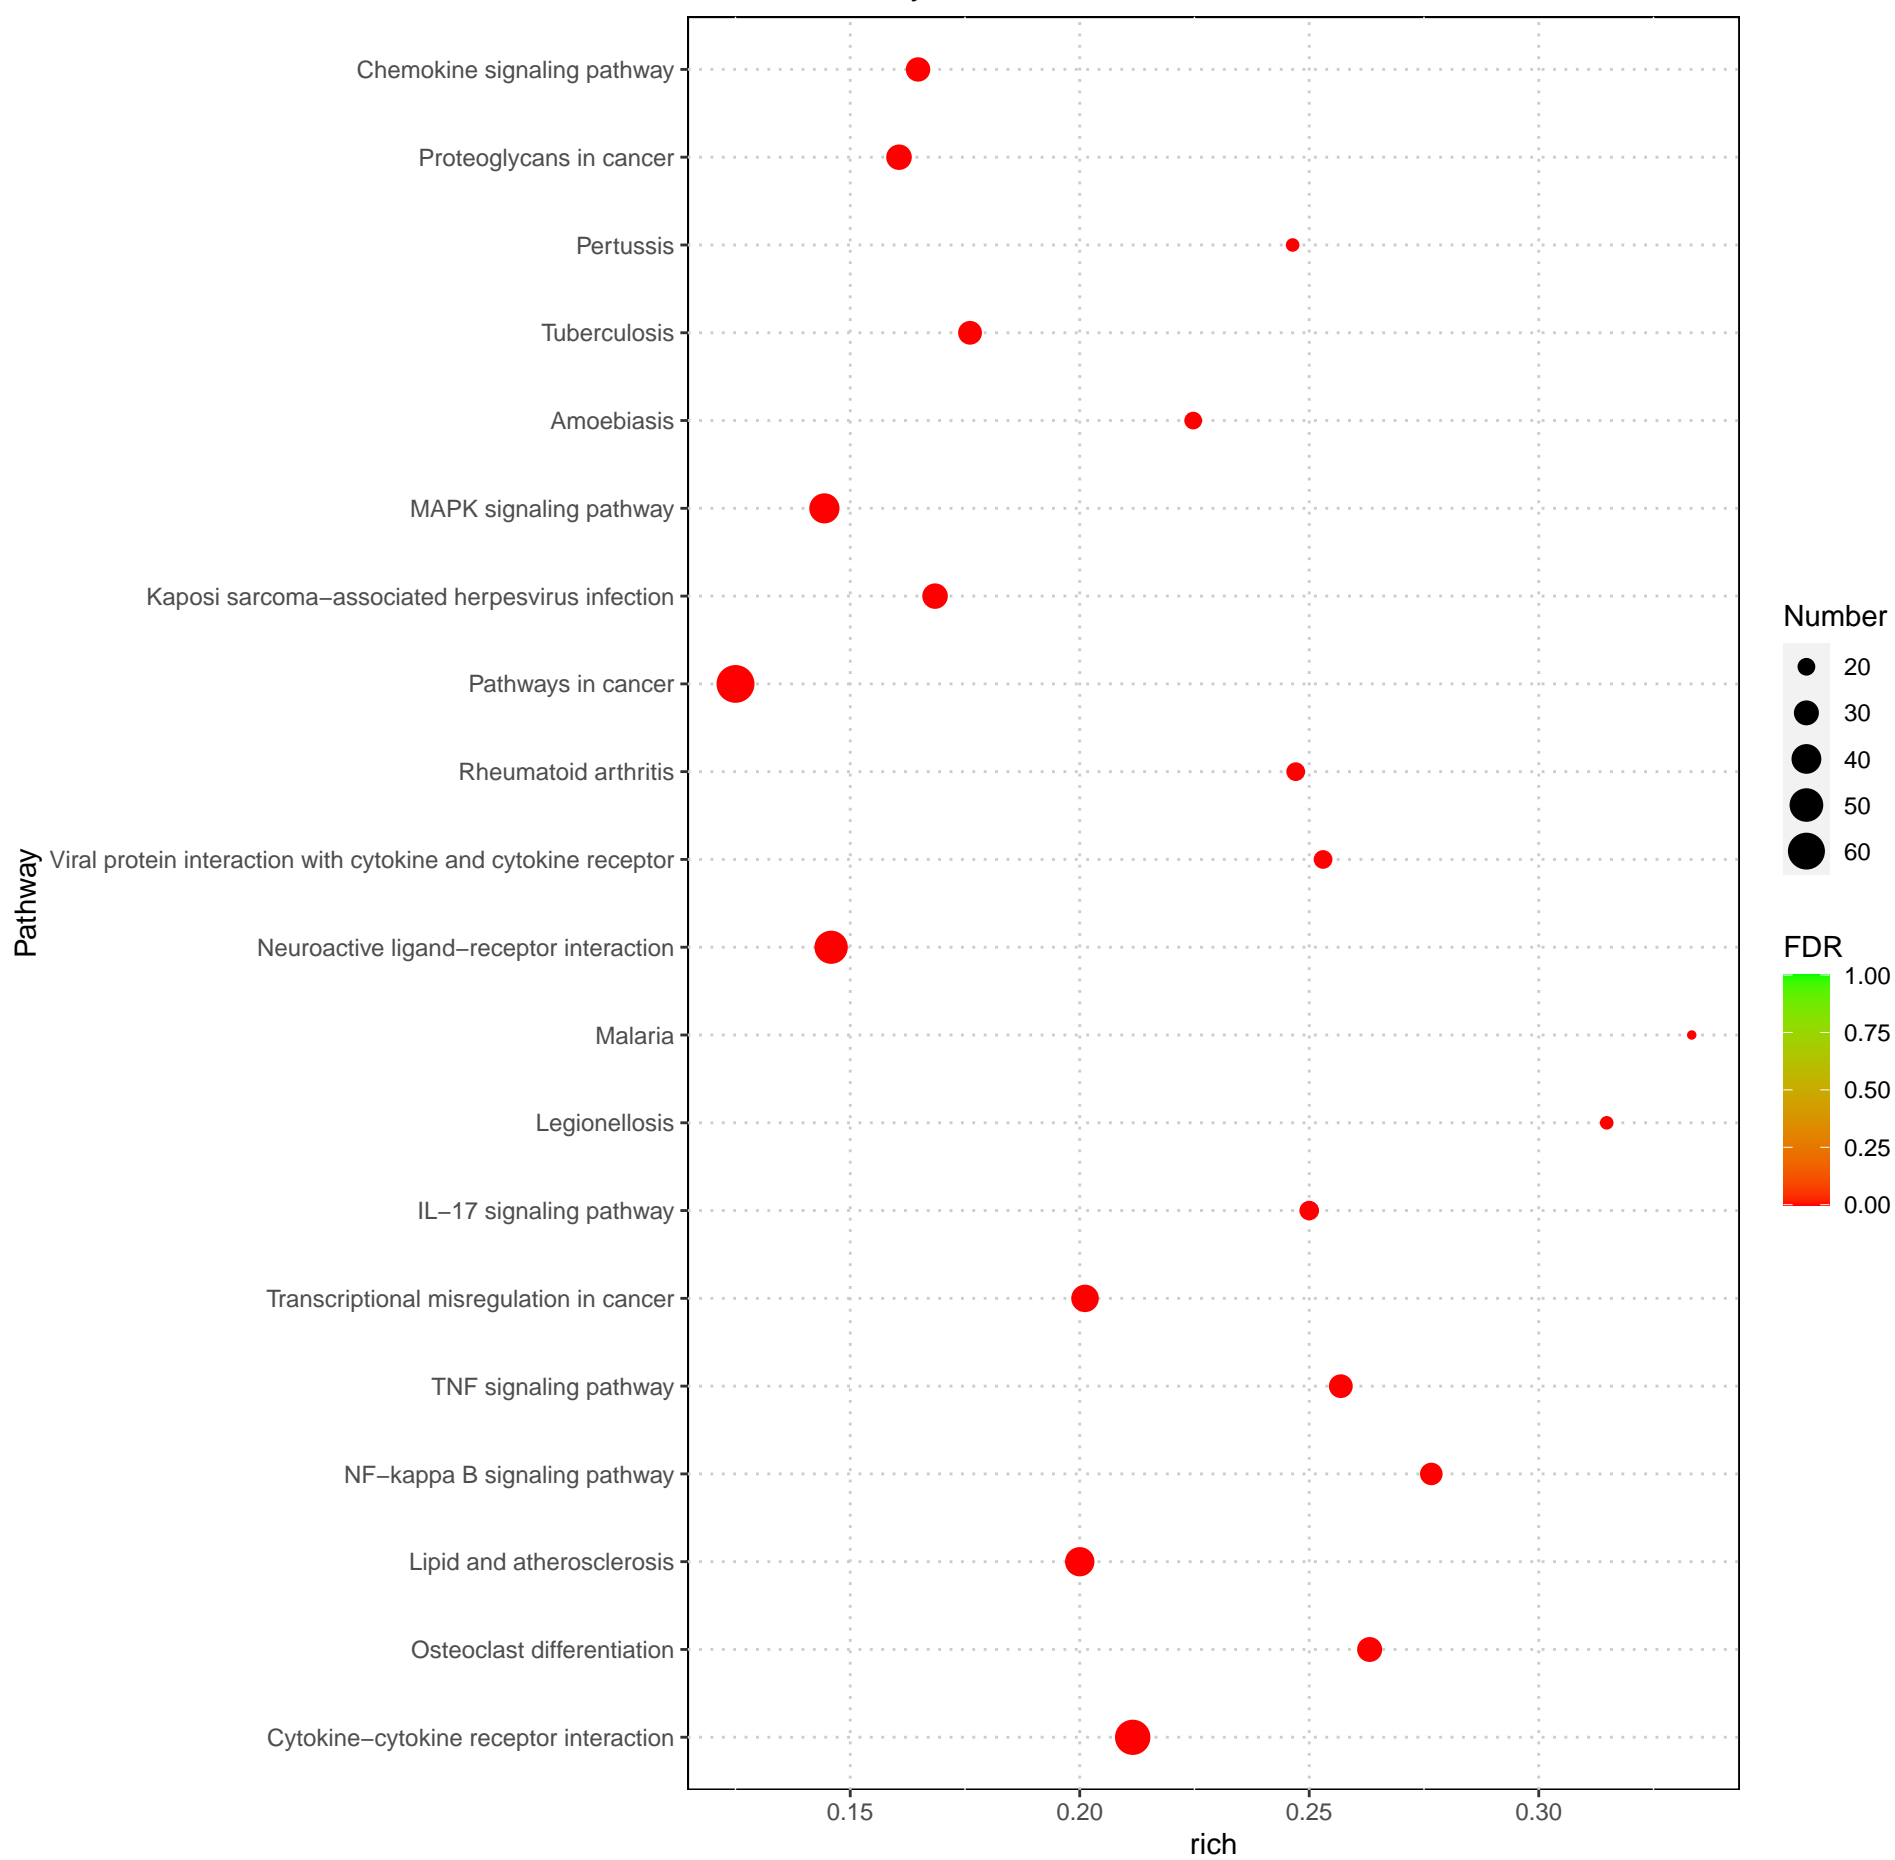

Supplement: Data_Sheet_2.ZIP [file Data_Sheet_2.ZIP]
